# Supplementary material for: An optimization of the LC-MS/MS workflow for deep proteome profiling on an Orbitrap Fusion
Source: Royal Society of Chemistry journal article supplement (doi:10.1039/c5ay01900a), 2015-12-02
Supplement: c5ay01900a2.xlsx [file c5ay01900a2.xlsx]

## Sheet: Table S1
Table S1 Comparison of protein quantitative accuracy with different resolutions with SILAC method.
Resolution-15,000		Resolution-30,000		Resolution-60,000		Resolution-120,000		Resolution-240,000		Resolution-450,000
Protein IDs	Ratio H/L normalized	Protein IDs	Ratio H/L normalized	Protein IDs	Ratio H/L normalized	Protein IDs	Ratio H/L normalized	Protein IDs	Ratio H/L normalized	Protein IDs	Ratio H/L normalized
F5GZU3;B7Z2F6;Q15424-2;Q15424;B7ZLP6;A0AV56	1.11	Q15424-2;Q15424;B7ZLP6;A0AV56;F5GZU3;B7Z2F6;K7ES42	1.1248	Q15424-2;Q15424;B7ZLP6;A0AV56;F5GZU3;B7Z2F6;K7ES42	0.96411	Q15424-2;Q15424;B7ZLP6;A0AV56;F5GZU3;B7Z2F6;K7ES42	0.97051	Q15424-2;Q15424;B7ZLP6;A0AV56;F5GZU3;B7Z2F6;K7ES42	0.96164	Q15424-2;Q15424;B7ZLP6;A0AV56;F5GZU3;B7Z2F6;K7ES42	0.9455
Q99798;A2A274	NaN	Q99798;A2A274	1.0794	M0R026;A1L0T0;M0R1B5;E9PJS0	0.83985	A0AVT1-2;A0AVT1;H0Y9U5;H0Y8S8	1.0613	A0AVT1;A0AVT1-2;H0Y8S8;A0AVT1-3	1.0863	Q99798;A2A274	1.0788
A6NC19;P30044-2;P30044-3;P30044	0.8433	B0V114;B0V113;B0V2J0;B0V112;B0V110;A2AB13;A2AB11;B0V2I8;B0V111;A2AB12;A2AB09;A2AB10;B0V109;O75955	NaN	Q99798;A2A274	1.0922	A0MZ66-2;A0MZ66-8;A0MZ66-4;A0MZ66-5;A0MZ66-6;A0MZ66;A0MZ66-3	NaN	A1A528;O43264	0.90122	H0Y9H2;P35611-2;E7EV99;A2A3N8;E7ENY0;P35611;P35611-3;Q86XM2;P35612-2;P35612-8;P35612-4;P35612-3;P35612	1.1842
A8MU28;Q13564-2;Q13564;A6NCK0	0.91394	A3KGN0;A2BEX1;A2ABE9;A3KGM9;B0V0L9;A2BEX3;A2BEX4;A2BEX2;A2ABF0;B4DZX3;H7C2J4;A3KGM4;A3KGM6;A3KGM5;O43196-4;O43196;O43196-2;O43196-3	1.2678	H0Y9H2;P35611-2;E7EV99;A2A3N8;E7ENY0;P35611;P35611-3;Q86XM2	0.94438	A1A528;O43264	NaN	M0R026;A1L0T0;M0R1B5;E9PJS0;E9PL44	NaN	B0V114;B0V113;B0V2J0;B0V112;B0V110;A2AB13;A2AB11;B0V2I8;B0V111;A2AB12;A2AB09;A2AB10;B0V109;O75955;B4DVY7	0.92378
A6NKE1;A6NDN0;O43617	0.90326	A2ABK4;E9PD43;A2ABK2;A2ABK1;B4DUN1;P18615;B4DYX9	0.84742	A2ABK4;E9PD43;A2ABK2;A2ABK1;B4DUN1;P18615;B4DYX9	0.8789	M0R026;A1L0T0;M0R1B5;E9PL44;E9PJS0	1.0118	Q99798;A2A274	0.99099	B0S7V7;A2ABH1;B4DIA2;Q8TD31;B0S7V6;E9PE84;Q8TD31-2;D6RDI7;B0V092;D6RAE7;E7EQE8;E7EQC5;A2ABH4;E9PGB6;E9PHV1;E7ETC7;A2ABH0;B0V091;A2ABH3;E7EPK4;A2ABH5;B0V090	1.2076
H7C1C4;P51610-2;P51610;A6NEM2	1.1627	A5YKK6-2;A5YKK6;H3BVC9;B5MDN3;A5YKK6-4;A5YKK6-3	1.1897	A2AE51;A2AE48;Q12899	1.1354	Q99798;A2A274	1.0695	H7C5M1;Q5TCT4;P42696-2;A2A2V2;P42696	0.79152	A2AE51;A2AE48;Q12899	1.0482
Q9UKK9;A6NFX8;H0YEY4;A6NCQ0;A6NJU6;A6NHE8	1.031	A8MU28;Q13564-2;Q13564;A6NCK0;J3QLH4	0.79098	A2IDC7;Q4TT37;A2IDC6;Q4TT38;Q13084	0.88339	P35611-2;E7EV99;A2A3N8;E7ENY0;P35611;P35611-3;H0Y9H2;Q86XM2;D6RJE2;H0YFD8;D6RAH3;D6RF25	0.90897	P35611-2;E7EV99;A2A3N8;E7ENY0;P35611;P35611-3;Q86XM2;H0Y9H2;D6RAH3;D6RJE2;H0YFD8;D6RF25	1.2037	A3KFL1;B4DKK6;A3KFL5;A3KFL2;Q13868	0.501
Q13813-3;Q13813;Q13813-2;A6NG51	1.1301	A6NDG6	0.80083	A3KFL1;B4DKK6;A3KFL5;A3KFL2;Q13868	0.88863	B0V112;B0V110;B0V111;A2AB12;A2AB09;A2AB10;B0V109;B4DVY7;O75955;B0V108;B0V114;B0V113;A2ABJ5;B0V2J0;A2AB13;A2AB11;B0V2I8	NaN	B0V114;B0V113;B0V2J0;B0V112;B0V110;A2AB13;A2AB11;B0V2I8;B0V111;A2AB12;A2AB09;A2AB10;B0V109;O75955	0.86007	A8MU28;Q13564-2;Q13564;A6NCK0;J3QLH4;J3QRA5;J3KRK3	0.85375
A6NG79;Q92733	1.0174	A6NKE1;A6NDN0;O43617	0.8615	P20839-2;P20839-4;C9J381;P20839;E7EQS0;P20839-3;C9JV30;J3KNX8;A4D0Z6	1.0213	A2BED6;A2BED7;Q96KQ7-2;B0UZY3;Q96KQ7;B0UZY0;A2ABF8;B0UZY1;A2ABF9	NaN	A2ABK4;E9PD43;A2ABK2;A2ABK1;B4DUN1;P18615;B4DYX9	0.59718	A6NDG6;H3BV17	0.94593
H3BMT0;H3BTV5;H3BU16;Q9H910-2;A6NGP5;Q9H910;H3BMV3;B4DLH4;H3BMM8;B4E1P3	1.0051	P51610-2;P51610;A6NEM2;P51610-3;H7C1C4	0.81214	A5YKK6-3;A5YKK6-2;A5YKK6;A5YKK6-4;H3BT18;H3BU44;H3BVC9;B5MDN3	0.60826	A2ABK4;E9PD43;A2ABK2;A2ABK1;B4DUN1;P18615;B4DYX9	0.69706	A2AE51;A2AE48;Q12899	0.93329	A6NDN0;O43617;A6NKE1	0.96838
A6NKB8;Q9H4A4	0.86613	B4DUS9;A6NF51;O95861;O95861-2;F8VVW8;F8VZG4;F8W1J0;B4DPS5	0.89904	A6NDG6;H3BV17	0.97733	A2AE51;A2AE48;Q12899	1.1456	A2IDC7;Q4TT37;A2IDC6;Q4TT38;Q13084	0.98764	P51610-2;P51610;A6NEM2;P51610-3;H7C1C4	0.7945
H0YK42;B4DEK4;Q13596-2;A6NKH4;O60749;Q13596	1.1301	B0QYY6;I3L1D4;B0QYY7;F8VR27;F8VZY7;A6NFN3;B4DF29;J3QQZ2;B0QYV1;J3QRF4;O43251-9;Q9NWB1-3;O43251-4;B0QYY4;O43251-5;O43251-10;F5H0M1;O43251-2;O43251;Q9NWB1-4;Q9NWB1-5;Q9NWB1;O43251-7;J3KNW3;Q9NWB1-2;B7Z1U7;O43251-6;O43251-8;F8VZG9	0.22598	A6NDN0;O43617;A6NKE1	0.97847	A2IDC6;Q4TT38;Q13084;A2IDC7;Q4TT37	0.81731	A3KFL1;B4DKK6;A3KFL5;A3KFL2;Q13868;A3KFL4	0.99476	Q92599-3;Q92599-2;A6NMH6;A6NFQ9;F6W7K9;F8W8I8;Q92599	1.114
E1B6W5;P22307-2;P22307-4;A6NM69;C9JC79;P22307;H0YF61	1.012	Q92599-2;A6NMH6;A6NFQ9;F6W7K9;F8W8I8;Q92599;Q92599-3	NaN	P51610-2;P51610;A6NEM2;P51610-3;H7C1C4	0.91168	A3KFL1;B4DKK6;A3KFL5;A3KFL2;Q13868	0.86367	P20839;E7EQS0;P20839-3;C9JV30;J3KNX8;A4D0Z6;P20839-2;P20839-4;C9J381;C9K0R9	0.89694	Q9UKK9;A6NFX8;A6NCQ0;A6NJU6;A6NHE8;H0YEY4;C9JYY9	1.0483
E9PM31;H0YEE2;E9PJK1;E9PRJ8;H0YDL9;H0YDJ9;P60033;E9PIF1;A6NMH8	1.0038	D6RAR7;D6RJC6;Q96EV8-3;Q96EV8;A6NFV8	0.91665	B1AK81;B4E2M3;A6NEM5;Q92643	0.99715	P20839;E7EQS0;P20839-3;C9JV30;J3KNX8;A4D0Z6;P20839-2;P20839-4;C9J381;C9K0R9;C9J029;H7C5T1;H7C511	0.97869	A5YKK6-2;A5YKK6;A5YKK6-3;A5YKK6-4;B5MDN3;H3BVC9;H3BMZ2	0.99652	A6NG79;Q92733	0.78106
P08133-2;A6NN80;P08133;E5RK69;E7EMC6;E5RFF0;E5RJR0;E5RI05;E5RJF5;E5RK63;H0YC77;E5RIU8	1.0152	Q9UKK9;A6NFX8;H0YEY4;A6NCQ0;A6NJU6;A6NHE8	0.88001	Q92599-3;Q92599-2;A6NMH6;A6NFQ9;F6W7K9;F8W8I8;Q92599;H7C604;C9J4G8;C9JV02	0.89973	H7C2K3;E7EP45;H0Y6N5;O94901-6;O94901-5;H0Y742;O94901-8;O94901;E9PHI4;A4D2Q0	1.0283	A8MU28;Q13564-2;Q13564;A6NCK0;J3QLH4;J3QRA5;J3KRK3	0.97362	A6NGP5;Q9H910;B4DLH4;H3BU16;Q9H910-2;H3BMV3;H3BMT0;H3BTV5;H3BMM8;B4E1P3	0.75665
Q5JX56;Q5JX58;Q5JX59;Q5JX60;Q5JX44;E7ENH5;A6PVH9;F2Z2V0;Q99829;B0QZ18;Q5JX55;Q5JX61;Q5JX52;Q5JX45;Q5JX53;Q5JX54;Q5JX57;E7EV27	0.89484	A6NG79;Q92733	1.1346	Q9UKK9;A6NFX8;A6NCQ0;A6NJU6;A6NHE8;H0YEY4;C9JYY9	0.95751	A5YKK6-4;A5YKK6-3;A5YKK6-2;A5YKK6;H3BR89;H3BVC9;H3BMH0	0.95891	A6NDG6;H3BV17	1.0561	H7C1X5;E7EUA2;Q9UPX8-4;Q9UPX8;H7BXK2;J3KQC3;Q9UPX8-3;A6NHU9	57.746
P35241;A7YIJ8;F5H1A7;E9PQ82;E9PNV3;P35241-3;H0YE16;P35241-2	0.76612	H3BU16;Q9H910-2;A6NGP5;Q9H910;B4DLH4;H3BMT0;H3BTV5;H3BMV3;H3BMM8;B4E1P3	0.94851	A6NG79;Q92733	0.94207	A6H8Z3;Q15042;C9J837	1.4794	A6NDN0;O43617;A6NKE1	0.99393	P63092-3;P63092-2;P63092;A6NI00;Q5JWF2-2;Q5JWF2	0.95428
Q8IXW7;G8JLE9;A8MQB8;Q06787-8;Q06787-6;G3V0J0;Q06787-2;Q06787-4;Q06787-5;G8JL90;Q06787-7;Q06787-3;Q06787	3.6346	H7BZG6;H0Y673;P56377;A6NH01;B7Z3M9;B4DSU4	1.2342	A6NGP5;Q9H910;B4DLH4;H3BU16;Q9H910-2;H3BMV3;H3BMT0;H3BTV5;H3BMM8;B4E1P3	0.95598	A8MU28;Q13564-2;Q13564;A6NCK0;J3QLH4;J3QRA5;J3KRK3	0.97548	P51610-2;P51610;A6NEM2;P51610-3;H7C1C4	0.94391	A6NIR2;Q9Y547	1.0933
A8MRB2;Q00059	3.2095	F5H677;Q8WTT2;A6NJZ9	0.74362	P63092-3;P63092-2;P63092;A6NI00;Q5JWF2-2;Q5JWF2	0.99856	A6NDG6;H3BV17	0.94574	Q92599-3;Q92599-2;A6NMH6;A6NFQ9;F6W7K9;F8W8I8;Q92599;H7C604;C9J4G8;C9JV02	1.0159	Q8WTT2;A6NJZ9;F5H677	0.91642
A8MU58;F8W950;Q13155	1.2751	H0YK42;Q13596-2;A6NKH4;Q13596;Q13596-3	1.3762	A6NIR2;Q9Y547	0.93077	A6NDN0;O43617;A6NKE1	1.0731	Q9UKK9;A6NFX8;H0YEY4;A6NCQ0;A6NJU6;A6NHE8	1.0361	A6NKB8;Q9H4A4;C9JMZ3	0.86703
A8MUD9;P18124;C9JZ88;C9JIJ5	1.2009	A6NLH6;Q9P003	0.91726	C9IZG3;Q92890-3;A6NJ11;Q92890;Q92890-1	0.84245	P51610-2;P51610;A6NEM2;P51610-3;H7C1C4	0.88944	A6NG79;Q92733	0.99209	Q13596-2;A6NKH4;Q13596;H0YK42;Q13596-3	1.3407
K7ENS2;K7ELT5;K7EP07;K7EK42;Q6FGY5;A8MVD5;Q99426;K7EL99	0.89538	E1B6W5;P22307-2;P22307-4;A6NM69;C9JC79;P22307;H0YF61	1.0237	Q8WTT2;A6NJZ9;F5H677	0.97673	B1AK81;B4E2M3;A6NEM5;Q92643	0.98504	A6NGP5;Q9H910;B4DLH4;H3BU16;Q9H910-2;H3BMV3;H3BMT0;H3BTV5;H3BMM8;B4E1P3	0.88666	A6NLH6;Q9P003	0.72546
Q49AN9;F5H013;P62308;A8MWD9	1.0426	O60831;A6NM71	NaN	H0YK42;Q13596-2;A6NKH4;Q13596;Q13596-3	1.6226	B4DUS9;A6NF51;O95861;O95861-2;F8VVW8;F8VZG4;F8W1J0;B4DPS5	0.9827	E9PIZ0;C9JST7;A6NGW1;O95070;F8W9A1	1.106	P22307-4;A6NM69;C9JC79;P22307;E1B6W5;P22307-2;H0YF61;H0YCB0;P22307-3;E9PLD1	1.0025
A8MXH2;Q99733;F5HFY4;C9J6D1;C9JZI7;E9PNW0;E9PJJ2;E9PS34;E9PNJ7;E9PKT8;H0YCI4;E9PKI2;E9PP22	0.96203	E9PM31;H0YEE2;E9PJK1;E9PRJ8;H0YDL9;H0YDJ9;P60033;E9PIF1;A6NMH8	1.0991	Q7Z3J3;A6NKT7;J3KNY6;J3KNE0;J3KQ37;Q99666;O14715;H7BZ48;Q99666-2;F8W705	0.70909	Q92599-3;Q92599-2;A6NMH6;A6NFQ9;F6W7K9;F8W8I8;Q92599;H7C604;C9J4G8;C9JV02	1.0364	H7BZG6;H0Y673;P56377;A6NH01;B7Z3M9;B4DSU4	0.82515	E9PJK1;E9PRJ8;H0YDL9;H0YDJ9;P60033;E9PIF1;A6NMH8;E9PM31;H0YEE2	1.1554
P43243;A8MXP9;D6REM6;B3KM87;P43243-2;D6R991;H0Y8T4;D6RBK5;D6RBI2;D6RE02;D6RIA2;D6RB45;D6R9F3;D6RAM9;D6RAY2;D6RBS2;D6RCM3;D6REK4;D6R8Z5	1.0047	O43768-6;O43768-5;O43768-2;O43768;D6RE62;O43768-9;O43768-7;O43768-3;O43768-4;A6NMQ3;C9JUF4;Q5T5H1;H3BQ52;H3BTD3;P56211-2;O43768-8;P56211;H3BMD8	0.94023	Q8IY57-3;Q8IY57-2;J3KNM5;A6NL56;Q8IY57	0.86986	D6RAR7;D6RJC6;Q96EV8-3;Q96EV8;A6NFV8	0.96152	A6NHH0;Q9H7Z7	NaN	O43768-2;O43768;O43768-9;O43768-3;O43768-4;A6NMQ3;C9JUF4;Q5T5H1;O43768-6;O43768-5;D6RE62;O43768-7;O43768-8;H3BQ52;H3BTD3;P56211-2;P56211;H3BMD8	1.0283
F5GZR4;Q14896;A8MXZ9	0.21006	P08133-2;A6NN80;P08133;E5RK69;E7EMC6;E5RJF5;E5RK63;E5RJR0;E5RI05;E5RFF0;E5RIU8	1.0135	A6NLH6;Q9P003	0.82189	Q9UKK9;A6NFX8;A6NCQ0;A6NJU6;A6NHE8;C9JYY9;H0YEY4	1.0365	H7C3S0;H7C338;C9K0F7;C9JAL0;F8WF64;C9JZK8;B3KQ77;H7C3I5;A6NND8;A6NHJ8;A6NMA8;O95825	NaN	P08133-2;A6NN80;P08133;E5RK69;E7EMC6;E5RJF5;E5RK63;E5RFF0;H0YC77;E5RIU8;E5RJR0;E5RI05	0.96823
M0R088;Q8IYB3-2;Q8IYB3;A9Z1X7;E9PCT1;M0R1E7;M0QXG5	0.73602	A6PVH9;F2Z2V0;Q99829;E7ENH5;B0QZ18;Q5JX56;Q5JX58;Q5JX59;Q5JX60;Q5JX44;Q5JX45;Q5JX55;Q5JX61;Q5JX52;Q5JX53;Q5JX54;Q5JX57;E7EV27;H0Y524	0.86996	P22307-4;A6NM69;C9JC79;P22307;E1B6W5;P22307-2;H0YF61;H0YCB0;P22307-3;E9PLD1	1.0447	A6NG79;Q92733	0.95642	J3KTL8;A6NHR9-2;A6NHR9;A6NHR9-3	0.95298	A6PVH9;F2Z2V0;Q99829;B0QZ18;E7ENH5;Q5JX56;Q5JX58;Q5JX59;Q5JX60;Q5JX44;Q5JX45;Q5JX55;H0Y524;Q5JX61;Q5JX52	0.82029
Q9Y262-2;J3KN35;Q9Y262;B0QY89;B0QY90;C9JHP4;C9K0Q7;H7C3A0	1.0054	A6PVN6;Q5T949;Q5T948;Q15257-3;Q15257-2;A6PVN5;Q15257;B4DZF8;A6PVN7;Q68CR8;A6PVN8;C9IZ76;A6PVN9;Q15257-4	0.80792	E9PJK1;E9PRJ8;H0YDL9;H0YDJ9;P60033;E9PIF1;A6NMH8;E9PM31;H0YEE2	1.0529	H3BU16;Q9H910-2;A6NGP5;Q9H910;B4DLH4;H3BMT0;H3BTV5;H3BMV3;H3BMM8;B4E1P3	0.96087	P63092-3;P63092-2;P63092;A6NI00;Q5JWF2-2;Q5JWF2	0.86897	A6PVN8;C9IZ76;A6PVN6;Q5T949;Q5T948;A6PVN9;Q15257-3;Q15257-2;A6PVN5;Q15257;B4DZF8	0.89536
Q01844-2;C9JGE3;Q01844-6;B0QYK0;Q01844-3;Q01844;Q01844-5;H7BY36	0.97299	Q9ULV4;A7MAP0;A7MAP1;H0YHL7;B4E3S0;F8W1H8;F8VUX3;F8VSA4;F8VRE9;F8VTT6;F8VVB7;Q6QEF8-4;Q6QEF8-3;Q6QEF8-2;J3QLV6;J3KSS5;Q6QEF8-5;Q6QEF8	1.0722	O43768-2;O43768;D6RE62;O43768-9;O43768-3;O43768-4;A6NMQ3;C9JUF4;Q5T5H1;H3BQ52;H3BTD3;P56211-2;O43768-8;P56211;O43768-6;O43768-5;H3BMD8;O43768-7	1.0137	H7BZG6;H0Y673;P56377;A6NH01;B7Z3M9;B4DSU4	0.94781	A6NIR2;Q9Y547	1.0934	Q9ULV4;A7MAP0;A7MAP1;B4E3S0;H0YHL7;F8W1H8;F8VUX3;F8VSA4;F8VRE9;F8VTT6;F8VVB7;F8VV53	0.8781
H3BPC4;H3BQQ9;P63279;B0QYN7	1.1409	P35241;A7YIJ8;F5H1A7;P35241-2;H0YE16;E9PQ82;E9PNV3;P35241-3	0.76468	A6PVH9;F2Z2V0;Q99829;B0QZ18;E7ENH5;Q5JX56;Q5JX58;Q5JX59;Q5JX60;Q5JX44;Q5JX45;Q5JX55;H0Y524;Q5JX61;Q5JX52	0.88447	J3KTL8;A6NHR9-2;A6NHR9;A6NHR9-3	1.8015	C9IZG3;Q92890-3;A6NJ11;Q92890;Q92890-1	0.95082	P35241;A7YIJ8;F5H1A7;E9PQ82;E9PNV3;P35241-3;H0YE16;P35241-2	0.835
P46379-4;P46379-5;P46379-2;B0UX83;P46379;P46379-3;F6S6P2	1.5523	A8CZ64;P28482;H0YDH9;K7ELV1;K7EN18;P31152;Q16659	0.76319	A6PVN6;Q5T949;Q5T948;Q15257-3;Q15257-2;A6PVN5;Q15257;B4DZF8;A6PVN8;C9IZ76;A6PVN9;A6PVN7;Q68CR8;Q15257-4	1.103	P63092-3;P63092-2;P63092;A6NI00;Q5JWF2-2;Q5JWF2;Q5JWE9;H0Y7F4	0.93798	F5H677;Q8WTT2;A6NJZ9	0.86342	A8CZ64;P28482	1.0175
P26640;B0V043;Q5SP20;B0V044;A2ABF4;B4DZ61	1.0426	H7C2I2;H7C521;H7C5L6;Q9UPE1-2;A8MPP7;Q9UPE1-3;A8MPY5;Q5R363;Q9UPE1-4;Q9UPE1;E7ETV6;B4DS61;Q96SB4;H3BLV9;P78362;P78362-2;Q96SB4-3	0.91213	Q9ULV4;A7MAP0;A7MAP1;B4E3S0;H0YHL7;F8W1H8;F8VUX3;F8VSA4;F8VRE9;F8VTT6;F8VVB7;Q6QEF8-4;Q6QEF8-3;Q6QEF8-2;J3QLV6;J3KSS5;Q6QEF8-5;Q6QEF8	0.98397	A6NIH7	0.61163	A6NKB8;Q9H4A4;C9JMZ3	0.91305	H7C2I2;H7C521;H7C5L6;Q9UPE1-2;A8MPP7;Q9UPE1-3;A8MPY5;Q5R363;Q9UPE1-4;Q9UPE1;E7ETV6;B4DS61;Q96SB4;H3BLV9;P78362;P78362-2;Q96SB4-3	0.83395
B0V0L0;P36915-2;P36915	0.92744	A8MPV3	NaN	P35241;A7YIJ8;F5H1A7;P35241-2;H0YE16	0.91297	A6NIR2;Q9Y547	1.0784	H0YK42;Q13596-2;A6NKH4;Q13596;Q13596-3	1.1719	H0Y9I0;H0Y8L4;P55196-2;P55196-6;Q5TIG5;P55196-3;C9JX92;P55196-1;P55196;A8MQ02;J3KN01;P55196-5	0.75112
P48444;B0YIW6;P48444-2;E9PK34	0.82224	A8MQB8;Q06787-8;G3V0J0;Q06787-2;G8JL90;G8JLE9;Q06787-6;Q06787-4;Q06787-5;Q06787-7;Q06787-3;Q06787;F8W871;Q8IXW7	0.54032	A8CZ64;P28482	0.83757	C9IZG3;Q92890-3;A6NJ11;Q92890;Q92890-1	0.74631	Q7Z3J3;A6NKT7;J3KNY6;J3KNE0	1.0341	A8MQB8;Q06787-8;Q06787-6;G3V0J0;Q06787-2;Q06787-4;Q06787-5;G8JL90;Q06787-7;Q06787-3;Q06787;Q8IXW7;G8JLE9	0.70483
B1AH49;P25325;J3KPV7	1.1405	A8MUD9;P18124;C9JIJ5;C9JZ88	1.1683	H3BQF7;H3BMU1;H3BUI0;J3KR23;P53990-2;P53990-3;P53990;P53990-4;A8KAH5;F5GXM3	0.55215	F5H677;Q8WTT2;A6NJZ9	1.1321	H7C2G7;H7C317;A6NKZ2;P51606	NaN	Q16643;Q16643-2;A8MV58;D6R9W4;F8W9Z3;D6R9Q9	1.2472
B1AH77;B1AH78;B1AH80;P63000;P15153;P63000-2;J3KSC4;J3QLK0;P60763	1.0319	A8MV33;O00764-2;O00764	1.2872	H7C2I2;H7C521;H7C5L6;Q9UPE1-2;A8MPP7;Q9UPE1-3;A8MPY5;Q5R363;Q9UPE1-4;Q9UPE1;E7ETV6;B4DS61;Q96SB4;H3BLV9;P78362;P78362-2;Q96SB4-3	0.92441	H0YK42;Q13596-2;A6NKH4;Q13596;Q13596-3	1.031	Q8IY57-3;Q8IY57-2;J3KNM5;A6NL56;Q8IY57	1.0088	K7ELT5;K7EP07;K7EK42;Q6FGY5;A8MVD5;Q99426;K7EL99;K7ENS2	1.0655
B1AHB1;P33992	1.0089	Q16643;A8MV58;D6R9W4;Q16643-2;D6RFI1;F8W9Z3;D6R9Q9	0.58243	H0Y9I0;H0Y8L4;P55196-2;P55196-6;Q5TIG5;P55196-3;C9JX92;P55196-1;P55196;A8MQ02;J3KN01;P55196-5	1.5241	Q7Z3J3;A6NKT7;J3KNY6;J3KNE0;H7BZ48;J3KQ37;Q99666;O14715	0.89995	A6NLH6;Q9P003	0.88488	Q49AN9;F5H013;P62308;A8MWD9	1.0064
P55769;B1AHD1	1.0582	K7ELT5;K7EP07;K7EK42;Q6FGY5;A8MVD5;Q99426;K7EL99;K7ENS2	0.52531	A8MQB8;Q06787-8;Q06787-6;G3V0J0;Q06787-2;Q06787-4;Q06787-5;G8JL90;Q06787-7;Q06787-3;Q06787;G8JLE9;Q8IXW7	1.6307	Q8IY57-3;Q8IY57-2;J3KNM5;A6NL56;Q8IY57	0.95664	P22307-4;A6NM69;C9JC79;P22307;E1B6W5;P22307-2;H0YF61;H0YCB0;P22307-3;E9PLD1	1.027	P43243;A8MXP9;D6REM6;D6R991;B3KM87;P43243-2;H0Y8T4;D6RBK5;D6R8Z5;D6RCM3;D6REK4;D6RB45;D6R9F3;D6RBS2;D6RBI2;D6RE02;D6RIA2;D6RAM9;D6RAY2	1.0531
B1AJY5;B1AJY7;O75832;B1AJY6;O75832-2	0.94371	P49589-2;A8MVQ3;B4DKY1;P49589;P49589-3	0.94993	A8MTP9;Q9Y2R4	1.2351	A6NLH6;Q9P003	0.75646	E9PJK1;E9PRJ8;H0YDL9;H0YDJ9;P60033;E9PIF1;A6NMH8;E9PM31;H0YEE2	0.92557	A8MXV4	0.49886
F5H7V1;G3V1R5;O43847;O43847-2;B1AKJ5;H0Y5G9	0.47185	O43660-2;O43660;A8MW61;B7Z982;H0YA24;D6RA26	0.94069	A8MUD9;P18124;C9JIJ5;C9JZ88	1.2853	P22307-4;A6NM69;C9JC79;P22307;E1B6W5;P22307-2;H0YF61;H0YCB0;P22307-3;E9PLD1	0.94885	O43768-2;O43768;O43768-9;O43768-3;O43768-4;A6NMQ3;C9JUF4;Q5T5H1;O43768-6;O43768-5;D6RE62;O43768-7;H3BQ52;H3BTD3;P56211-2;O43768-8;P56211;H3BMD8	0.98193	Q14203-5;Q14203-2;Q14203-3;Q14203-4;E7EX90;A8MY36;Q14203;E7EWF7;Q6AWB1	1.152
B1AKP7;G3V162;Q13148;Q13148-2;K7EJM5;K7EN94;Q13148-3;B4DJ45;K7EL26;K7EJ99	1.0874	Q49AN9;F5H013;P62308;A8MWD9;C9JVQ0	1.1024	Q16643;A8MV58;Q16643-2;D6RFI1;D6R9W4;F8W9Z3;D6R9Q9	0.86359	E9PJK1;E9PRJ8;H0YDL9;H0YDJ9;P60033;E9PIF1;A6NMH8;E9PM31;H0YEE2	1.2397	A6PVN6;Q5T949;Q5T948;Q15257-3;Q15257-2;A6PVN5;Q15257;B4DZF8;A6PVN8;C9IZ76;A6PVN9;A6PVN7;Q68CR8;Q15257-4	1.0291	A8MY76;Q86U38	0.69664
Q9NP97;Q8TF09;B4DFR2;H3BQI1;B1AKR6	1.1995	A8MXP8;Q14257;F8WCY5	0.77075	K7ELT5;K7EP07;K7EK42;Q6FGY5;A8MVD5;Q99426;K7ENS2;K7EL99	0.73614	O43768-2;O43768;O43768-9;O43768-3;O43768-4;A6NMQ3;C9JUF4;Q5T5H1;O43768-6;O43768-5;D6RE62;O43768-7;O43768-8;H3BTD3	1.0514	Q9ULV4;A7MAP0;A7MAP1;B4E3S0;H0YHL7;F8W1H8;F8VUX3;F8VSA4;F8VRE9;F8VTT6;F8VVB7;F8VV53;Q6QEF8-4;Q6QEF8-3;Q6QEF8-2;J3QLV6;J3KSS5;Q6QEF8-5;Q6QEF8	0.92061	P34896-3;P34896-2;A8MYA6;P34896;J3KRZ5	1.1659
B1ANR0;Q13310-2;Q13310;Q13310-3;H0Y5F5;H0YEU6;B1ANR1;H0Y6X6;H0YCC8;H0YER0	1.0244	P43243;A8MXP9;D6REM6;D6R991;B3KM87;P43243-2;H0Y8T4;D6RBK5;D6RCM3;D6REK4;D6R8Z5;D6RBI2;D6RE02;D6RIA2;D6RB45;D6R9F3;D6RAM9;D6RAY2;D6RBS2	0.9989	P49589-2;A8MVQ3;B4DKY1;P49589;P49589-3	0.502	A6NN80;P08133;P08133-2;E5RK69;E7EMC6;E5RFF0;E5RJR0;E5RI05;E5RJF5;E5RK63;H0YC77;E5RIU8	1.0772	P35241;A7YIJ8;F5H1A7;P35241-2;H0YE16;P35241-3;E9PQ82;E9PNV3	1.0201	J3QKW7;A8MZF9;P55039;J3QR71;J3QRI9	1.2333
E7EP42;E9PB91;B1APJ0;O14925;Q5SRD1	0.92384	F5GZR4;Q14896;A8MXZ9	NaN	O43660-2;O43660;A8MW61;B7Z982;H0YA24;D6RA26	1.1176	A6NNI4;P21926;G8JLH6	NaN	F8W871;A8MQB8;Q06787-8;G3V0J0;Q06787-2;G8JL90;Q06787-6;Q06787-4;Q06787-5;Q06787-7;Q06787-3;Q06787;G8JLE9	0.91076	M0R088;Q8IYB3-2;Q8IYB3;A9Z1X7;E9PCT1;M0R1E7;M0QXG5;B4DED5	0.96107
B1APM4;P35610;P35610-3;P35610-2	0.71753	Q14203-5;Q14203-2;Q14203-3;Q14203-4;E7EX90;A8MY36;Q14203;Q6AWB1	0.79701	Q49AN9;F5H013;P62308;A8MWD9;C9JVQ0	1.0443	A6PVH9;Q99829;F2Z2V0;B0QZ18;E7ENH5;Q5JX56;Q5JX58;Q5JX59;Q5JX60;Q5JX44;Q5JX45;Q5JX55;Q5JX61;Q5JX52;Q5JX53;Q5JX54;Q5JX57;E7EV27;H0Y524	0.8847	A8MTP9;Q9Y2R4	0.84473	Q9Y262;B0QY89;Q9Y262-2;J3KN35;B0QY90;C9JHP4;C9K0Q7;H7C3A0	1.0783
P07602;B1AVU8	1.1724	A8MY67;P30154-4;P30154;P30154-2;H0YDG7;J3KR29;P30154-3	0.72252	E9PQ02;A8MX29;Q9H0B6-2;Q9H0B6;E9PI24;E9PP09;C9JHT2;E9PM83	0.69469	A6PVN6;Q5T949;Q5T948;Q15257-3;Q15257-2;A6PVN5;Q15257;B4DZF8;A6PVN8;C9IZ76;A6PVN9;A6PVN7;Q68CR8;Q15257-4	1.0824	A8MUD9;P18124;C9JIJ5;C9JZ88	1.3051	Q01844-2;C9JGE3;Q01844-6;B0QYK0;Q01844-3;Q01844;Q01844-5;H7BY36	0.97966
F5H780;E9PMY9;E9PIR7;B2R5P6;Q16881-5;E2QRB9;Q16881-2;B7Z2S5;Q16881-4;E9PNQ6;E7ESI6;Q16881-3;E7EW10;Q16881-6;B7Z904;Q16881;E9PKD3	1.3415	A8MY76;Q86U38	NaN	P43243;A8MXP9;D6REM6;D6R991;B3KM87;P43243-2;H0Y8T4;D6RBK5;D6RCM3;D6REK4;D6R8Z5;D6RBI2;D6RE02;D6RIA2;D6RB45;D6R9F3;D6RAM9;D6RAY2;D6RBS2	1.0416	Q9ULV4;A7MAP0;A7MAP1;B4E3S0;H0YHL7;F8W1H8;F8VUX3;F8VSA4;F8VRE9;F8VTT6;F8VVB7;Q6QEF8-4;Q6QEF8-3;Q6QEF8-2;J3QLV6;J3KSS5;Q6QEF8-5;Q6QEF8	0.93643	Q16643;A8MV58;D6R9W4;Q16643-2;F8W9Z3;D6R9Q9;D6RFI1	0.95962	H3BPC4;H3BQQ9;P63279;B0QYN7	0.83239
Q9UBE0-2;Q9UBE0-3;B3KNJ4;Q9UBE0;M0QX65;M0QZS6;M0R375;M0QYM8;M0R054;B4DY66	0.95074	P34896-3;P34896-2;A8MYA6;P34896;B4DPM9;J3KRZ5	0.959	F5GZR4;Q14896;A8MXZ9	0.035718	P35241;A7YIJ8;F5H1A7;P35241-2;H0YE16;E9PQ82;E9PNV3;P35241-3	1.1008	K7ELT5;K7EP07;K7EK42;Q6FGY5;A8MVD5;Q99426;K7EL99;K7ENS2	0.98218	H0Y799;E9PIQ3;B0V072;B0V073;P25440;H0Y6K2;P25440-2;B0S7P1;E9PKQ9;Q658Y7	1.3975
F8W020;F8VY35;B3KNT8;F8W0J6;F5H4R6;H0YIV4;P55209;F5H1X5;H0YHC3;F8W118;F8VV59;B7Z9C2;F8VRJ2;F8VVB5;H0YH88;F8VXI6;F8VUX1;F8W543;B3KV44	1.0333	M0R088;Q8IYB3-2;Q8IYB3;A9Z1X7;E9PCT1;M0R1E7;M0QXG5;B4DED5	0.85441	Q14203-5;Q14203-2;Q14203-3;Q14203-4;E7EX90;A8MY36;Q14203;E7EWF7;Q6AWB1	0.97972	A8CZ64;P28482	1.0116	P49589-2;A8MVQ3;B4DKY1;P49589;P49589-3	0.74624	P46379-4;P46379-5;P46379-2;B0UX83;P46379;P46379-3;F6S6P2;F6UR09;F6U1F2;F6XTU0;F6RG75;F6WML8;F6VEM6;F6X9W3;F6U341	1.0771
B3KR49;E9PBK7;E9PQW4;P27361-3;P27361;H0YEX6;E9PRH7;E9PJF0	1.3735	Q9Y262-2;J3KN35;Q9Y262;B0QY89;B0QY90;C9JHP4;C9K0Q7;H7C3A0	1.0179	A8MY76;Q86U38	0.90158	H0Y9I0;H0Y8L4;P55196-2;P55196-6;Q5TIG5;P55196-3;C9JX92;P55196-1;P55196;A8MQ02;J3KN01;P55196-5	0.99311	O43660-2;O43660;A8MW61;B7Z982;H0YA24;D6RA26	1.0109	P26640;B0V043;Q5SP20;B0V044;A2ABF4;B4DZ61;H0Y426	0.91504
F5H5N1;B3KRI2;O75251;F5GXJ1	1.4951	Q01844-2;C9JGE3;Q01844-6;B0QYK0;Q01844-3;Q01844;Q01844-5;H7BY36	1.2788	P34896-3;P34896-2;A8MYA6;P34896;J3KRZ5	0.7222	A8MQB8;Q06787-8;Q06787-6;G3V0J0;Q06787-2;Q06787-4;Q06787-5;G8JL90;Q06787-7;Q06787-3;Q06787;Q8IXW7;G8JLE9	1.2241	Q49AN9;F5H013;P62308;A8MWD9;C9JVQ0	1.0759	B0V0L0;P36915-2;P36915	0.55904
B3KRS5;Q92769;J3KPW7;E5RFI6;E5RJ04;E5RGV4;E5RHE7;E5RH52;E5RG37;E5RFP9;H3BM24;E5RK19;E7ESJ6;F5GXM1;O15379;O15379-2	1.069	H3BPC4;H3BQQ9;P63279;B0QYN7	0.74896	J3QL90;J3KRL5;J3QR71;J3QKV7;J3QRI9;J3QKW7;A8MZF9;P55039;J3QQI1;J3QLF3	1.6799	F8WDS8;C9J0U9;D3YTH5;Q53HC9;A8MUM1	3.0815	A8MX49;P49593	NaN	P48444;B0YIW6;P48444-2;E9PK34	0.84127
O15372;B3KS98;E5RHC7;E5RH59;E5RFW7;E5RFH0;E5RGU4;E5RJT0	1.0542	B0QZ37;B0QZ36;E9PPG9;P78406;E9PQ57	0.74124	M0R088;Q8IYB3-2;Q8IYB3;A9Z1X7;E9PCT1;M0QXG5;M0R1E7;B4DED5	0.90346	Q16643;A8MV58;Q16643-2;D6RFI1;D6R9W4;F8W9Z3;D6R9Q9	0.99531	P43243;A8MXP9;D6REM6;D6R991;B3KM87;P43243-2;H0Y8T4;D6R8Z5;D6RBK5;D6RCM3;D6REK4;D6RB45;D6R9F3;D6RBS2;D6RBI2;D6RE02;D6RIA2;D6RAM9;D6RAY2	1.0215	B1AH49;P25325;J3KPV7	1.0779
O00303;B3KSH1;B4DEW9;H0YDT6;E9PQV8	0.88092	G8JLL2;B0UYY4;B0S865;B0UYY6;B0UYY2;Q9UMR5-2;Q9UMR5;G8JLE1;B0S872	0.55707	Q9Y262;B0QY89;Q9Y262-2;J3KN35;B0QY90;C9JHP4;C9K0Q7;H7C3A0	1.072	K7ELT5;K7EP07;K7EK42;Q6FGY5;A8MVD5;Q99426;K7EL99;K7ENS2	0.64913	Q14203-5;Q14203-2;Q14203-3;Q14203-4;E7EX90;A8MY36;Q14203;E7EWF7;Q6AWB1	0.71362	B1AH87;P30536	0.94018
F8W7U8;P49959;B3KTC7;P49959-2	1.1358	P46379-4;P46379-5;P46379-2;B0UX83;P46379;P46379-3;F6S6P2;F6UR09;F6U1F2;F6XTU0;F6RG75;F6WML8;F6VEM6;F6X9W3;F6U341	1.5382	Q01844-2;C9JGE3;Q01844-6;B0QYK0;Q01844-3;Q01844;Q01844-5;H7BY36	1.0012	P49589-2;A8MVQ3;B4DKY1;P49589;P49589-3	0.50205	P34896-3;P34896-2;A8MYA6;P34896;J3KRZ5;B4DPM9	0.96219	B1AHA8;P09601	0.34146
F5H3C5;B4E3K9;B3KUK2;F5H4R2;F5GYZ5;P04179	0.94603	P26640;B0V043;B4DZ61;Q5SP20;B0V044;A2ABF4;H0Y426	0.96779	C9IZX9;B0QZ65;B4DGD8;C9IZ08;F8W9S7;Q14C86-3;Q14C86-4;Q14C86-5;Q14C86-2;Q14C86;Q14C86-6	NaN	O43660-2;O43660;A8MW61;D6RA26;B7Z982;H0YA24	0.95884	A8MZF9;P55039;J3KRL5;J3QKW7	0.77251	B1AHB1;P33992	0.97394
J3QLE5;P14678-2;P63162;P14678;B3KVR1;P14678-3;J3KRY3	1.0488	B0V0L0;P36915-2;P36915	0.88199	P25440;H0Y6K2;P25440-2;B0S7P1;E9PKQ9;H0Y799;E9PIQ3;B0V072;B0V073;Q658Y7	1.1887	A8MW78;Q13588	NaN	M0R088;Q8IYB3-2;Q8IYB3;A9Z1X7;E9PCT1;M0QXG5;M0R1E7;B4DED5	0.88835	P55769;B1AHD1	0.92936
B3KXD6;B5MCF9;O00541-2;O00541;H7C267	0.93476	P48444;B0YIW6;P48444-2;E9PK34	0.83042	P46379-4;P46379-5;P46379-2;B0UX83;P46379;P46379-3;F6S6P2	1.0488	Q49AN9;F5H013;P62308;A8MWD9	0.95588	Q9Y262;B0QY89;Q9Y262-2;J3KN35;B0QY90;C9JHP4;C9K0Q7;H7C3A0;H0Y7E6	1.0433	B1AJQ6;Q86Y82	NaN
B3KYB6;B3KYB7;P48739;P48739-2;B7Z7Q0	0.98836	B1AH49;P25325;J3KPV7	1.2631	P26640;B0V043;Q5SP20;B4DZ61;B0V044;A2ABF4;H0Y426	0.96209	A8MX49;P49593	NaN	Q01844-6;B0QYK0;Q01844-3;Q01844;Q01844-5;Q01844-2;C9JGE3;H7BY36;F8WC90;Q01844-4	0.92198	B1AJY7;O75832;B1AJY5;O75832-2;B1AJY6	0.88926
B4DEM2;C9J7P1;H0Y5J4;B4DDD6;Q9UJU6;Q9UJU6-2;B4DDP6;Q9UJU6-3	1.6718	B1AHB1;P33992;B1AHB2	0.9458	B0V0F8;O60231;B0V0F7;A2AB15;Q5SQH5;Q5JP46;F5H658;Q14562	0.91888	P43243;A8MXP9;D6REM6;D6R991;B3KM87;P43243-2;H0Y8T4;D6RBK5;D6R8Z5;D6RCM3;D6REK4;D6RBI2;D6RE02;D6RIA2;D6RB45;D6R9F3;D6RAM9;D6RAY2;D6RBS2	1.0129	Q99829;B0QZ18;A6PVH9;F2Z2V0;E7ENH5;Q5JX56;Q5JX58;H0Y524;Q5JX59;Q5JX60;Q5JX44;Q5JX45;Q5JX55;Q5JX61;Q5JX52;Q5JX53;Q5JX54;Q5JX57;E7EV27	0.90938	B1AK87;P47756-2;P47756;B1AK88;F6USW4;B1AK85;F6Q0E3	0.96357
B4E1C5;B4DDD8;J3KNE5;P12081-2;D6REN6;P12081;E7ETE2;C9JWK3;B3KWE1;D6RF05;B4DQ67;C9JHI8;E9PG66;C9JV49;B4DDY8;P49590	1.1556	P55769;B1AHD1	0.91061	B0V0L0;P36915-2;P36915	0.97415	A8MXV4	0.88532	P25440;H0Y6K2;P25440-2;B0S7P1;H0Y799;E9PIQ3;B0V072;B0V073;Q658Y7;E9PKQ9	1.0602	G3V1R5;O43847;O43847-2;B1AKJ5;F5H7V1	1.0966
B4DDV1;Q13325	1.0694	B1AJQ6;Q86Y82	0.92254	B0V109;O75955;B0V114;B0V113;B0V2J0;B0V112;B0V110;A2AB13;A2AB11;B0V2I8;B0V111;A2AB12;A2AB09;A2AB10;B4DVY7;B0S8A9	1.1232	C9JFM5;A8MXY0;Q12846	NaN	P46379-4;P46379-5;P46379-2;B0UX83;P46379;P46379-3;F6S6P2;H0Y4L1;H0Y710	0.85146	Q9NP97;B4DFR2;B1AKR6;Q8TF09;H3BQI1	0.82844
Q8WYA6-3;Q8WYA6-2;B4DE16;Q8WYA6	1.0229	B1AJY5;B1AJY7;O75832;B1AJY6;O75832-2	0.9684	P48444;B0YIW6;P48444-2;E9PK34	0.97296	Q14203-5;Q14203-2;Q14203-3;Q14203-4;E7EX90;A8MY36;Q14203;E7EWF7;Q6AWB1	0.89534	P26640;B0V043;B4DZ61;Q5SP20;B0V044;A2ABF4;H0Y426	1.0055	B1AKZ5;Q15121;B1AKZ3	NaN
B4DE40;P52788-2;P52788	1.679	B1AK87;P47756-2;B1AK88;F6USW4;B1AK85;P47756;F6Q0E3	1.1753	B1AH49;P25325;J3KPV7	1.1944	A8MY76;Q86U38	1.1269	B0V0F8;O60231;B0V0F7;A2AB15;Q5SQH5;Q5JP46;F5H658;Q14562	0.95327	B1AMU7;B1AMU3;B1AMU4;Q9Y3B2	0.71528
K7EMV3;B4DEB1;K7EK07;Q71DI3;Q16695;P84243;P68431;K7ES00;K7EP01;Q6NXT2	0.81617	G3V1R5;O43847;O43847-2;B1AKJ5;H0Y5G9;F5H7V1	0.98747	B1AHA8;P09601	0.21339	P34896-3;P34896-2;A8MYA6;P34896;B4DPM9;J3KRZ5	1.2046	B0V0L0;P36915-2;P36915	0.84489	B4DEJ6;B3KT28;B1ANM7;Q9UNN5-2;Q9UNN5	1.0268
F5H698;B4DER1;Q9P2J5;B4DJ10	0.9661	B1AKR6;Q9NP97;B4DFR2;Q8TF09;H3BQI1	1.0976	B1AHB1;P33992;B1AHB2	1.1186	A8MZF9;P55039;J3KRL5;J3QKW7	0.92663	P48444;B0YIW6;P48444-2;E9PK34	0.98684	B1ANR0;Q13310-2;Q13310;Q13310-3;H0Y5F5;H0YEU6;H0YEQ8;B1ANR1;H0YCC8;H0Y6X6;H0YER0	1.0162
B4DEZ3;Q9P0J0;K7EJE1;B4DF76;J3KN00;E7ENQ6	0.83937	Q15121;B1AKZ3;B1AKZ5	4.9006	P55769;B1AHD1	1.1032	M0R088;Q8IYB3-2;Q8IYB3;A9Z1X7;E9PCT1;M0QXG5;M0R1E7;B4DED5	0.94369	B1AH87;P30536	0.94365	B1APM4;P35610;P35610-3;P35610-2	0.73049
B4DF38;I3L3N5;I3L2U8;P43034	1.0694	H0YBU8;Q8N983-4;Q8N983-3;H0Y6Y8;B1AL05;Q8N983-2;Q8N983;C9J5Q3;B1AL06	1.5435	B1AJQ6;Q86Y82	0.91448	Q9Y262;B0QY89;Q9Y262-2;J3KN35;B0QY90;C9JHP4;C9K0Q7;H7C3A0	1.0894	B1AHA8;P09601	NaN	P07602;B1AVU8;P07602-2;C9JIZ6;P07602-3	0.95216
B4DFA2;I3L0N3;P46459;I3L0L3	1.2758	B1ALC0;O15511;O15511-2	1.1352	B1AJY7;O75832;B1AJY5;O75832-2;B1AJY6	1.0862	Q01844-6;B0QYK0;Q01844-3;Q01844;Q01844-5;Q01844-2;C9JGE3;H7BY36;F8WC90;Q01844-4	0.9519	B1AHB1;P33992;B1AHB2	1.0318	E9PIR7;B2R5P6;Q16881-5;E2QRB9;Q16881-2;B7Z2S5;Q16881-4;E9PNQ6;E7ESI6;Q16881-3;E7EW10;Q16881-6;B7Z904;Q16881;E9PKD3;F5H780;E9PMY9;E9PIZ5;E9PQI3;E9PLT3;E9PKI4	0.8169
B4DFL2;P48735;B4DSZ6;H0YL11	0.96083	B1APM4;P35610;P35610-3;P35610-2	0.97373	B1AK87;P47756-2;B1AK88;P47756;F6USW4;B1AK85;F6Q0E3	1.0949	P25440;H0Y6K2;P25440-2;B0S7P1;H0Y799;E9PIQ3;B0V072;B0V073;Q658Y7;E9PKQ9	0.87938	P55769;B1AHD1	1.0961	F8VY35;B3KNT8;F5H4R6;P55209;F8W0J6;H0YIV4;F8W020;F8VV59;F5H1X5;F8W118;F8VUX1;F8W543;B7Z9C2;F8VRJ2;F8VVB5;H0YH88;H0YHC3;F8VXI6;B3KV44;F8VUC3;B7Z4K9	1.0061
P27824;B4DGP8;B4E2T8;D6RAU8;D6RB85;D6RDP7;H0Y9Q7;D6RAQ8;D6RHJ3;D6RD16;D6RFL1;D6RGY2	0.85645	P07602;B1AVU8;P07602-2;C9JIZ6;P07602-3	1.0382	Q5TZA2-2;B1AKD8;Q5TZA2	1.0563	P46379-4;P46379-5;P46379-2;B0UX83;P46379;P46379-3;F6S6P2;F6UR09;F6U1F2;F6XTU0;F6RG75;F6WML8;F6VEM6;F6X9W3;F6U341	1.054	B1AJQ6;Q86Y82	0.95023	B3KQ95;B4DT56;B7Z1J3;B4DJE5;E9PNM1;P37268	1.0384
B4DHG0;E9PEX6;P09622;B4DT69	1.0323	F5H780;E9PMY9;E9PIR7;B2R5P6;Q16881-5;E2QRB9;Q16881-2;B7Z2S5;Q16881-4;E9PNQ6;E7ESI6;Q16881-3;E7EW10;Q16881-6;B7Z904;Q16881;E9PKD3;E9PIZ5	1.0593	G3V1R5;O43847;O43847-2;B1AKJ5;F5H7V1	0.93229	P26640;B0V043;Q5SP20;B4DZ61;B0V044;A2ABF4;H0Y426	0.97875	B1AJY7;O75832;B1AJY5;O75832-2;B1AJY6	0.98252	F5H5N1;B3KRI2;O75251;F5GXJ1	0.79024
B4DIH5;P61201;P61201-2;H0YKU5;H0YM03	0.92646	F8W020;F8VY35;B3KNT8;F8W0J6;F5H4R6;H0YIV4;P55209;F5H1X5;F8VVB5;H0YH88;H0YHC3;F8W118;F8VV59;F8W543;B7Z9C2;F8VRJ2;F8VXI6;F8VUX1;B3KV44	1.0103	Q96SU4-5;Q96SU4-4;Q96SU4-3;E9PJW9;Q96SU4-7;Q96SU4-2;Q96SU4;B1AKJ6;Q96SU4-6;J3KPA3	1.0434	B0V0L0;P36915-2;P36915	0.87377	B1AK87;P47756-2;B1AK88;P47756;F6USW4;B1AK85;F6Q0E3	0.93294	B3KRS5;Q92769;J3KPW7;E5RFI6;E5RJ04;E5RGV4;E5RHE7;E5RH52;E5RG37;E5RFP9;H3BM24;E5RK19	0.91705
D6RDM7;B4DIZ2;P61086-2;P61086	NaN	F5H5N1;B3KRI2;O75251;F5GXJ1	1.4064	B1AKZ5;Q15121;B1AKZ3	6.0254	P48444;B0YIW6;P48444-2;E9PK34	0.95822	O43847;O43847-2;B1AKJ5;G3V1R5;F5H7V1	0.94683	O15372;B3KS98;E5RJT0;E5RGU4;E5RHC7;E5RH59;E5RFW7;E5RFH0	1.1492
B4DJ81;P28331-3;P28331-4;P28331-5;P28331;P28331-2	1.2424	B3KRS5;Q92769;J3KPW7;E5RFI6;E5RJ04;E5RGV4;E5RHE7;E5RH52;E5RG37;E5RFP9;H3BM24;E5RK19;E7ESJ6;O15379;O15379-2	0.95916	H0YBU8;Q8N983-4;Q8N983-3;H0Y6Y8;B1AL05;Q8N983-2;Q8N983;C9J5Q3;B1AL06	1.0893	B1AH49;P25325;J3KPV7	1.2582	Q96SU4-5;Q96SU4-4;Q96SU4-3;E9PJW9;Q96SU4-7;Q96SU4-2;Q96SU4;B1AKJ6;Q96SU4-6;J3KPA3	0.84391	O00303;B3KSH1;B4DEW9;H0YDT6;E9PQV8	1.1477
Q92990-2;B4DJ85;Q92990	NaN	O15372;B3KS98;E5RJT0;E5RGU4;E5RHC7;E5RH59;E5RFW7;E5RFH0	1.0606	Q14155-1;B1ALK7;B7Z6G2;Q14155-5	NaN	B1AH87;P30536	NaN	Q9NP97;B4DFR2;B1AKR6;Q8TF09;H3BQI1	0.9303	O15382-2;M0QZP4;B3KSI3;O15382;M0QZ10;M0QXF9;M0R2K7	0.84616
B4DJ96;O95232;J3KPP4;H0YA81	0.8812	O00303;B3KSH1;B4DEW9;H0YDT6;E9PQV8	0.95319	B1AMU7;B1AMU3;B1AMU4;Q9Y3B2	1.024	P55769;B1AHD1	1.0982	B1AKZ5;Q15121;B1AKZ3	NaN	P49959-2;F8W7U8;P49959;B3KTC7;F5GXT0	0.89037
B4DJE7;B7Z9I1;P11310;P11310-2;Q5T4U5	1.1211	O15382-2;M0QZP4;B3KSI3;O15382;M0QZ10;M0QXF9	1.2475	B1ANR0;Q13310-2;Q13310;Q13310-3;H0Y5F5;H0YEU6;H0YCC8;H0YEQ8;B1ANR1;H0Y6X6;H0YER0;P0CB38;J3KTH5	0.99401	B1AJQ6;Q86Y82	0.951	H0YBU8;Q8N983-4;Q8N983-3;H0Y6Y8;B1AL05;Q8N983-2;Q8N983;C9J5Q3;B1AL06	1.4348	B3KUB4;O43570-2;O43570	1.2965
B4DJF3;B7Z3X4;D6RAY7;Q2VYF1;E7EVU7;Q8TDQ7-3;D6R9P4;Q8TDQ7;P46926;D6RFF8	NaN	F8W7U8;P49959;B3KTC7;P49959-2	1.1159	D6RCR1;B1ANS9-2;B1ANS9	0.94813	B1AJY7;O75832;B1AJY5;O75832-2;B1AJY6	1.0147	Q14155-1;B1ALK7;B7Z6G2;Q14155-5	NaN	B3KUK2;P04179;P04179-2;F5H3C5;F5H4R2;F5GYZ5;B4E3K9;G8JLJ2;G5E9P6;F5GXZ9	0.94855
B4DJP7;P62318;H3BT13	1.0454	B3KUK2;P04179;P04179-2;F5H3C5;B4E3K9;F5H4R2;F5GYZ5;G8JLJ2;G5E9P6;F5GXZ9	0.91139	B1APM4;P35610;P35610-3;P35610-2	1.1402	B1AK87;P47756-2;B1AK88;P47756;F6USW4;B1AK85;F6Q0E3	0.9299	B1AMU7;B1AMU3;B1AMU4;Q9Y3B2	1.2134	J3QLE5;P14678-2;P63162;P14678;B3KVR1;P14678-3;J3KRY3	1.0632
G3V5X9;Q9UNH7-2;B4DJS7;Q9UNH7	0.3611	B3KUM1;Q8ND07	0.80264	P07602;B1AVU8;P07602-2;C9JIZ6;P07602-3	0.9078	Q5TZA2-2;B1AKD8;Q5TZA2	NaN	B1APM4;P35610;P35610-3;P35610-2	0.98843	B3KXD6;B5MCF9;O00541-2;O00541;H7C267	0.94539
B4DJV2;O75390;H0YIC4;F8VPF9;F8VPA1;F8W1S4;H0YH82;F8W642;F8VZK9;F8VX07;F8VRP1;F8VX68;F8VRI6;F8VR34;F8VTT8;F8W4S1	0.96134	J3QLE5;P14678-2;P63162;P14678;B3KVR1;P14678-3;J3KRY3	1.0569	E9PIR7;B2R5P6;Q16881-5;E2QRB9;Q16881-2;B7Z2S5;Q16881-4;E9PNQ6;E7ESI6;Q16881-3;E7EW10;Q16881-6;B7Z904;Q16881;E9PKD3;F5H780;E9PMY9;E9PIZ5;E9PQI3;E9PLT3;E9PKI4	1.0507	G3V1R5;O43847;O43847-2;B1AKJ5;F5H7V1	0.99762	B1ARP7;Q9NWV4	0.98197	B3KXH8;Q9Y5X1	1.1879
M0R213;Q4G0M0;M0R0Y2;B4DK44;P54920;Q9H115	0.89906	B3KXD6;B5MCF9;O00541-2;O00541;H7C267	1.1097	B2WTI3;B2WTI4;Q6NYC1-2;K7EJU9;Q6NYC1;Q6NYC1-3	1.0346	Q96SU4-5;Q96SU4-4;Q96SU4-3;E9PJW9;Q96SU4-7;Q96SU4-2;Q96SU4;B1AKJ6;Q96SU4-6;J3KPA3	1.0037	P07602;B1AVU8;P07602-2;C9JIZ6;P07602-3	0.98237	O43747;O43747-2;J3KQU9;B3KXW5;H3BR36;H3BUN9;H3BNR4	0.69938
E9PGZ4;B4DK71;Q9NTJ5;C9J3E3;F8WD07;C9JV50;F8WDN7	1.304	B3KYB6;P48739;P48739-2;B7Z7Q0;B3KYB7	0.90424	F8VY35;B3KNT8;F5H4R6;P55209;F8W0J6;H0YIV4;F8VV59;F8W543;H0YH88;F8W020;F8W118;F8VUX1;B7Z9C2;F5H1X5;F8VVB5;H0YHC3;F8VRJ2;F8VXI6;B3KV44;F8VUC3;B7Z4K9	1.0415	Q9NP97;B4DFR2;B1AKR6;Q8TF09;H3BQI1	0.91932	E9PIR7;B2R5P6;Q16881-5;E2QRB9;Q16881-2;B7Z2S5;Q16881-4;E9PNQ6;E7ESI6;Q16881-3;E7EW10;Q16881-6;B7Z904;Q16881;F5H780;E9PMY9;E9PKD3;E9PIZ5;E9PQI3;E9PLT3;E9PKI4	0.8499	B3KYB6;P48739;P48739-2;B7Z7Q0;B3KYB7	0.86796
C9J0K6;B4DKK2;P30626-2;P30626	0.82652	B4DDD2;P00374;C9JJ68;B4DM58;Q86XF0	0.72592	B3KQ95;B4DT56;B7Z1J3;B4DJE5;E9PNM1;P37268	0.96127	B1AKZ5;Q15121;B1AKZ3	NaN	B2WTI3;B2WTI4;Q6NYC1-2;K7EJU9;Q6NYC1;Q6NYC1-3	0.8573	B4DDD2;P00374	0.54082
B4DL14;P36542-2;P36542	1.0544	B4DDV1;Q13325	0.99247	B3KRH1;Q99496;Q06587-2;Q06587	0.41195	H0YBU8;Q8N983-4;Q8N983-3;H0Y6Y8;B1AL05;Q8N983-2;Q8N983;C9J5Q3;B1AL06	1.0617	F8VY35;B3KNT8;F5H4R6;P55209;F8W0J6;H0YIV4;F8VV59;F8W020;F8W118;F8VUX1;F8W543;B7Z9C2;F5H1X5;H0YH88;H0YHC3;F8VRJ2;F8VVB5;F8VXI6;B3KV44;F8VUC3;B7Z4K9	1.0192	Q8WYA6-3;Q8WYA6-2;B4DE16;Q8WYA6	1.0605
B4DLN1;P52815;I3L1E8;B4E1E9;Q9UBX3;Q9UBX3-2	1.1601	Q8WYA6-3;Q8WYA6-2;B4DE16;Q8WYA6	1.0235	F5H5N1;B3KRI2;O75251;F5GXJ1	1.5599	Q14155-1;B1ALK7;B7Z6G2;Q14155-5	1.3512	B3KQ95;B4DT56;B7Z1J3;B4DJE5;E9PNM1;P37268	1.0333	B4DE40;P52788-2;P52788;H7C2R7	1.1336
M0R117;B4DM74;Q02543;M0R3D6;M0R1A7;M0R0P7	1.4107	B4DE40;P52788;H7C2R7;P52788-2	1.2368	B3KRS5;Q92769;J3KPW7;H3BM24;E5RFI6;E5RJ04;E5RGV4;E5RHE7;E5RH52;E5RG37;E5RFP9;E5RK19;E7ESJ6	0.96102	B1AMU7;B1AMU3;B1AMU4;Q9Y3B2	1.0198	F5H5N1;B3KRI2;O75251;F5GXJ1	1.0559	B4DE85;Q9BUQ5;P48651	0.69199
J3QL05;J3KP15;B4DN89;Q01130;Q9BRL6-2;Q9BRL6	1.0395	B4DEH8;G3V4T2;Q86U42-2;Q86U42;Q92843-2;H0YJH9;A6NDY0-2;A6NDY0;A6NDY0-4	1.2188	O15372;B3KS98;E5RJT0;E5RGU4;E5RHC7;E5RH59;E5RFW7;E5RFH0	1.0689	B4DEJ6;B3KT28;B1ANM7;Q9UNN5-2;Q9UNN5	0.90616	B3KRS5;Q92769;J3KPW7;H3BM24;Q5TEE2;E5RFI6;E5RJ04;E5RGV4;E5RHE7;E5RH52;E5RG37;E5RFP9;E5RK19;E7ESJ6;O15379;O15379-2	0.97516	K7EMV3;B4DEB1;K7EK07;Q71DI3;Q16695;P84243;P68431;K7ES00;K7EP01;Q6NXT2	0.87059
Q9Y3F4;B4DNJ6;B0AZV0;H0YH33	1.0309	B4DEK4;O60749;D6RC15	1.0594	O00303;B3KSH1;B4DEW9;H0YDT6;E9PQV8	1.0501	B1APM4;P35610;P35610-3;P35610-2	0.96435	O15372;B3KS98;E5RJT0;E5RGU4;E5RHC7;E5RH59;E5RFW7;E5RFH0	1.0701	B4DVV9;K7EPE7;B4DED7;B4DGZ7;F5H2J3;Q96GC9	0.75579
B4DP21;B4DP11;Q15185	0.93992	F5H698;B4DER1;Q9P2J5;B4DJ10	0.99646	O15382-2;M0QZP4;B3KSI3;O15382;M0QZ10;M0QXF9;M0R2K7	0.95925	B1ARP7;Q9NWV4	0.94054	O00303;B3KSH1;B4DEW9;H0YDT6;E9PQV8	1.1116	B4DEH8;G3V4T2;Q86U42-2;Q86U42;Q92843-2;H0YJH9	0.89241
B4DP17;P62633-3;P62633-2;P62633-5;P62633;P62633-4;P62633-6	1.1149	B4DEZ3;Q9P0J0;K7EJE1;B4DF76;J3KN00;E7ENQ6	0.96972	F8W7U8;P49959;B3KTC7;P49959-2;F5GXT0;F5H742;F5H256	1.0236	P07602;B1AVU8;P07602-2;C9JIZ6;P07602-3	0.95865	O15382-2;B3KSI3;O15382;M0QXF9;M0QZP4;M0QZ10;M0R2K7	1.1444	B4DEK4;O60749;D6RC15	0.98985
B4DPJ8;P40227;P40227-2	1.0662	B4DFA2;I3L0N3;P46459;I3L0L3	1.6965	B3KUK2;P04179;F5H3C5;P04179-2;F5H4R2;F5GYZ5;G8JLJ2;B4E3K9;G5E9P6;F5GXZ9	0.92615	E9PIR7;B2R5P6;Q16881-5;E2QRB9;Q16881-2;B7Z2S5;Q16881-4;E9PNQ6;E7ESI6;Q16881-3;E7EW10;Q16881-6;B7Z904;Q16881;F5H780;E9PMY9;E9PKD3;E9PIZ5;E9PLT3;E9PKI4;E9PQI3	0.90453	Q9H3P2-7;B3KSP0;Q9H3P2;H0Y3X6	0.93371	F5H698;B4DER1;Q9P2J5;B4DJ10	0.95805
B4DQ51;P45954	0.96363	B4DFL2;P48735;B4DSZ6;H0YL11	1.0382	J3QLE5;P14678-2;P63162;P14678;B3KVR1;P14678-3;J3KRY3	1.0762	F8VY35;B3KNT8;F5H4R6;P55209;F8W0J6;H0YIV4;F8VV59;F8W020;F8W118;F8VUX1;F8W543;B7Z9C2;F5H1X5;H0YH88;H0YHC3;F8VRJ2;F8VVB5;F8VXI6;B3KV44;F8VUC3;B7Z4K9	1.0319	F8W7U8;P49959;B3KTC7;P49959-2;F5GXT0	1.0262	F5H2F9;B4DF41;P52701;P52701-2	1.1335
Q13595-2;B4DQI6;B4DUA9;Q13595	1.1666	P27824;B4DGP8;B4E2T8;D6RAU8;D6RB85;D6RDP7;H0Y9Q7;D6RAQ8;D6RHJ3;D6RD16;D6RFL1;D6RGY2;H0Y9H1	1.0223	B3KXH8;Q9Y5X1	0.92242	B3KQ95;B4DT56;B7Z1J3;B4DJE5;E9PNM1;P37268	1.1305	B3KUK2;P04179;F5H3C5;F5H4R2;P04179-2;F5GYZ5;G8JLJ2;B4E3K9;G5E9P6;F5GXZ9	0.87571	B8ZZQ4;B4DF73;Q96EY7	0.89498
B4DQJ8;P52209;F5H7U0;K7EM49;K7EMN2;K7EPF6;K7ELN9	1.1336	B4DHZ0	0.75868	O43747;O43747-2;J3KQU9;B3KXW5;H3BNR4	1.1511	B3KR41;Q9Y6D9;C9JTA2	1.2923	J3QLE5;P14678-2;P63162;P14678;B3KVR1;P14678-3;J3KRY3	1.0562	B4DF96;B4DQ14;F8WAE5;Q9BY44;C9IZE1;Q9BY44-2;H7C5Q3;H7C5R5	0.53086
H7C3D3;B4DQX7;B4DQR8;H0Y2Y8;Q15942	NaN	B4DI85;Q9NVJ2	0.84575	B4DDV1;Q13325	1.1634	F5H5N1;B3KRI2;O75251;F5GXJ1	1.3101	O43747;O43747-2;J3KQU9;B3KXW5;H3BR36;H3BUN9;H3BNR4	1.0694	B4DFA2;I3L0N3;P46459;I3L0L3	1.0382
Q99879;Q99877;Q93079;Q5QNW6;P62807;P58876;O60814;Q5QNW6-2;B4DR52;P57053	0.95293	B4DIV7;Q12765-3;Q12765;Q12765-2	1.1134	B4DE16;Q8WYA6;Q8WYA6-3;Q8WYA6-2;A2A2P1	0.8707	B3KRS5;Q92769;J3KPW7;H3BM24;E5RFI6;E5RJ04;E5RGV4;E5RHE7;E5RH52;E5RG37;E5RFP9;E5RK19;E7ESJ6;O15379;O15379-2	1.0181	B3KYB6;P48739;P48739-2;B7Z7Q0;B3KYB7	0.91164	K7EMQ8;J3QKS7;C0IMW7;C0IMW5;B4DFR4;Q969G3-2;C0IMW4;B4DGM3;Q969G3	0.69995
P61619;B4DR61;H7C1Q9;C9JXC6;H7C069;A6NK38;F2Z2C7;A6NIF9;C9JJV4;P61619-3;F8W776;Q8TC24;Q9H9S3-2;Q9H9S3-3;Q9H9S3	0.69227	B4DJ81;P28331-3;P28331-4;P28331-5;P28331;P28331-2	0.46331	B4DVV9;K7EPE7;B4DED7;B4DGZ7;F5H2J3;Q96GC9	0.80187	O15372;B3KS98;E5RJT0;E5RGU4;E5RHC7;E5RH59;E5RFW7;E5RFH0	1.0269	K7ES69;Q99439-2;B4DDF4;Q99439;B4DUT8;H3BQR6;H3BTZ5;H3BQH0;H3BVI6	1.0251	B4DGJ5;M0QX35;Q8N7H5	0.87196
B4DR63;P62191;G3V4X1	0.9844	Q92990-2;B4DJ85;Q92990	1.0088	B4DEK4;O60749;D6RC15	1.0473	O00303;B3KSH1;B4DEW9;H0YDT6;E9PQV8	1.084	K7EJL1;B4DDG7;E7ENJ6;Q9BXS5;Q9BXS5-2;K7EPJ8	1.0942	P27824;B4DGP8;B4E2T8;D6RAU8;D6RB85;D6RDP7;H0Y9Q7;D6RAQ8;D6RGY2;D6RHJ3;D6RD16;D6RFL1;H0Y9H1	0.93185
Q13126-4;Q13126;B4DUC8;Q13126-3;Q13126-2	1.1356	B4DJE7;B7Z9I1;P11310;P11310-2;Q5T4U5;H0YDT5	1.0755	F5H698;B4DER1;Q9P2J5;B4DJ10	1.0466	O15382-2;M0QZP4;B3KSI3;O15382;M0QZ10;M0QXF9;M0R2K7	1.1493	B4DDS3;F5H8J3;O96005	1.2603	Q9C005;B4DIS3	1.0661
B4DUI3;F5H425;O75822	1.9661	B4DJP7;P62318;H3BT13	1.0168	F5H2F9;B4DF41;P52701;P52701-2	1.0898	P49959;B3KTC7;F8W7U8;P49959-2;F5GXT0	0.98472	B4DDV1;Q13325	1.0762	B4DIV7;Q12765-3;Q12765;Q12765-2	1.1027
B4DUR9;O95433;G3V438;H0YJG7;H0YJ63;G3V3W9;H0YJU2	0.80129	G3V5X9;Q9UNH7-2;B4DJS7;Q9UNH7	0.9735	B8ZZQ4;B4DF73;Q96EY7	0.8905	B3KUK2;P04179;P04179-2;F5H3C5;F5H4R2;F5GYZ5;B4E3K9;G8JLJ2;G5E9P6;F5GXZ9	0.92865	B4DE16;Q8WYA6;Q8WYA6-3;Q8WYA6-2;A2A2P1	1.0346	B4DJ81;P28331-3;P28331-4;P28331-5;P28331;P28331-2	1.1883
B4DUX0;O00154-6;O00154-4;O00154-5;O00154;O00154-2;K7EKP8;O00154-3;F5GWE2	0.98974	B4DJV2;O75390;H0YIC4;H0YH82;F8VRP1;F8VX68;F8VPF9;F8VPA1;F8VTT8;F8W1S4;F8W4S1;F8W642;F8VZK9;F8VX07;F8VRI6;F8VWQ5;F8VVF6;F8VU34;F8VR34	0.90799	B4DFA2;I3L0N3;P46459;I3L2G1;I3L0L3;K7EQD6	0.97228	B3KV94;Q9UGL1;Q9UGL1-2	0.6318	B4DVV9;K7EPE7;B4DED7;B4DGZ7;F5H2J3;Q96GC9	0.81865	Q92990-2;B4DJ85;Q92990	1.1481
Q15717;B4DVB8;M0QZR9	1.101	M0R213;Q4G0M0;M0R0Y2;B4DK44;P54920;Q9H115	0.66345	K7ESP6;K7EJ21;B4DFM7;Q9BXR0	0.96044	J3QLE5;P14678-2;P63162;P14678;B3KVR1;P14678-3;J3KRY3	1.0514	B4DEK4;O60749;D6RC15	1.0499	B4DJ96;O95232;J3KPP4;D6RDI2;H0YA81	1.0456
B4DVE7;P50995	0.88934	E9PGZ4;B4DK71;Q9NTJ5;F8WDN7;C9J3E3;F8WD07;C9JV50	1.3734	Q9NP97;B4DFR2;B1AKR6;Q8TF09;H3BNG9;H3BPA0;Q9NP97-2;Q7Z4M1;H3BQI1	0.97804	O43747;O43747-2;J3KQU9;B3KXW5;H3BR36;H3BUN9;H3BNR4	0.92118	B8ZZQ4;B4DF73;Q96EY7	1.2186	B4DJP7;P62318;H3BT13	1.0546
B4DVY1;O15371;B0QYA5;B0QYA6;B0QYA7;B0QYA8	1.2348	C9J0K6;B4DKK2;P30626-2;P30626;B4DHQ6	0.8794	J3QKS7;C0IMW7;C0IMW5;B4DFR4;Q969G3-2;C0IMW4;B4DGM3;Q969G3;K7EMQ8;J3KT85;J3QR61;H7C048	0.79921	B4DDD8;D6REN6;P12081;B4E1C5;B3KWE1;J3KNE5;P12081-2;E7ETE2;C9JWK3;D6RF05;B4DQ67;C9JHI8;E9PG66;C9JV49;B4DDY8;P49590	0.94507	B4DFA2;I3L0N3;P46459;I3L0L3	1.0045	Q9UNH7-2;B4DJS7;Q9UNH7;G3V5X9	1.0712
B4DWC7;B4E136;Q6YN16-2;Q6YN16	NaN	Q9H8Y8;B4DKT0	NaN	Q15418-3;B7Z3B5;F5GYC4;B4DG22;B7ZB17;E9PRI4;E9PGT3;Q15349;Q15418;P51812;Q15349-3;Q15418-2;Q15349-2;F2Z2J1;E9PMM7;D6R910;Q5SVM6;Q5TI62;B1AXG1;Q9UK32;B7ZL90	0.88036	H3BQR6;K7ES69;H3BTZ5;H3BQH0;H3BVI6;Q99439-2;B4DDF4;Q99439;B4DUT8	0.68369	K7ESP6;K7EJ21;B4DFM7;Q9BXR0	1.0039	B4DJV2;O75390;H0YIC4;H0YH82;F8VRP1;F8VX68;F8VPF9;F8VPA1;F8VTT8;F8W1S4;F8W4S1;F8W642;F8VZK9;F8VX07;F8VRI6;F8VWQ5;F8VVF6;F8VU34;F8VR34	1.004
B4DWJ2;P47897;H7C0R3;B7Z840;C9J165;F2Z2V6;C9JSG9	0.96337	H7C3H1;F5H7D9;B4DKZ7;Q8WXI9;Q86YP4-2;Q86YP4;B5MC40	1.8024	P27824;B4DGP8;B4E2T8;D6RAU8;D6RB85;D6RDP7;H0Y9Q7;D6RAQ8;D6RGY2;D6RHJ3;D6RD16;D6RFL1;H0Y9H1	1.0877	K7EJL1;B4DDG7;E7ENJ6;Q9BXS5;Q9BXS5-2;K7EPJ8	1.5509	K7EMQ8;J3QKS7;C0IMW7;C0IMW5;B4DFR4;Q969G3-2;C0IMW4;B4DGM3;Q969G3;H7C048	0.94039	E9PGZ4;B4DK71;Q9NTJ5;F8WDN7;C9J3E3;F8WD07;C9JV50	0.9292
B4DX20;Q92526;Q92526-2	0.97757	B4DL14;P36542-2;P36542	0.98951	B4DGX2;P48426;H7BXS3;Q5JUT3;P78356	NaN	B4DDS3;F5H8J3;O96005	1.2311	F5GYC4;B4DG22;B7ZB17;P51812;Q15418-3;B7Z3B5;E9PRI4;E9PGT3;Q15349;Q15418;Q15349-3;Q15418-2;Q15349-2;F2Z2J1;E9PMM7;D6R910;Q5SVM6;Q5TI62;B1AXG1;Q9UK32;B7ZL90	0.98082	C9J0K6;B4DKK2;P30626-2;P30626;B4DHQ6	0.95156
B4DX52;P25685;M0R080	NaN	B4DLN1;P52815;I3L1E8;B4E1E9;Q9UBX3;Q9UBX3-2	1.0418	Q9C005;B4DIS3	0.97478	B4DDV1;Q13325	1.0317	B4DG89;Q8TAT6;Q8TAT6-2	0.72145	B4DKL3;Q10713;Q5SXN9	1.0523
F5H3I4;B4DXP9;P61163;P42025	0.8102	M0R117;B4DM74;Q02543;M0R3D6;M0R1A7;M0R0P7	1.4081	B4DIV7;Q12765-3;Q12765;Q12765-2	0.9111	B4DE16;Q8WYA6;Q8WYA6-3;Q8WYA6-2;A2A2P1	1.0354	B4DGJ5;M0QX35;Q8N7H5	0.9833	B4DL14;P36542-2;P36542	1.0068
C9JZE0;C9JY20;E7EU85;E9PFF5;P51114-3;P51114-2;B4DXZ6;P51114	0.91729	J3KQP6;H3BMH2;B4DT13;B4DMK0;H3BSC1;P62491;Q15907;B4DQU5;P57735	1.1231	Q92990-2;B4DJ85;Q92990	1.0656	B4DVV9;K7EPE7;B4DED7;B4DGZ7;F5H2J3;Q96GC9	0.94166	B4DGL8;G3XAC4;O75027;O75027-2	0.84596	B4DLH2;Q8N357	1.398
G3V4W0;B4DY08;P07910-2;P07910;P07910-4;G3V576;P07910-3;G3V555;G3V575;G3V5X6;G3V3K6;G3V251;G3V2D6;B4DSU6;G3V5V7;O60812;G3V4M8;G3V2H6;E5RG71;B3KT61;Q86SE5;G3V129	0.98945	J3QL24;J3QKT4;J3KQ22;P32322-2;P32322;B4DMU0;J3QR88;J3QLK9;J3QL23;J3QL32;E2QRB3	0.7967	B4DJP7;P62318;H3BT13	0.94777	B4DEK4;O60749;D6RC15	1.0887	P27824;B4DGP8;B4E2T8;H0Y9Q7;D6RAU8;D6RB85;D6RDP7;D6RAQ8;D6RFL1;D6RGY2;D6RHJ3;D6RD16;H0Y9H1	0.9903	B4DLN1;P52815;B4E1E9;Q9UBX3;Q9UBX3-2;I3L1E8	0.93511
H3BPU7;H3BPM5;H3BN01;H3BNY8;H3BT46;B4DYB8;H3BMZ9;H3BPP3;H3BP57;H3BT48;H3BUZ9;P34949-2;F5GX71;H3BPB8;P34949;H3BUG1;H3BU66;H3BQX0	1.0758	B4DMV3;H7C5G1;Q2TAA2	1.385	Q9UNH7-2;B4DJS7;Q9UNH7;G3V5X9	0.95318	F5H698;B4DER1;Q9P2J5;B4DJ10	1.0428	B4DGU4;P35222;E7EMJ5	1.0377	B4DMK0;Q15907;J3KQP6;H3BMH2;B4DT13;H3BSC1;P62491;B4DQU5;M0R2D0;P57735	0.94597
Q92598-2;Q92598-3;Q92598;B4DYH1;B4DY72;Q5TBM3	1.0872	J3QL05;J3KP15;B4DN89;Q01130;Q9BRL6-2;Q9BRL6	0.9695	B4DJV2;O75390;H0YIC4;H0YH82;F8VRP1;F8VX68;F8VPF9;F8VPA1;F8VTT8;F8W1S4;F8W4S1;F8W642;F8VZK9;F8VX07;F8VRI6;F8VWQ5;F8VVF6;F8VU34;F8VR34	1.0029	B8ZZQ4;B4DF73;Q96EY7	1.4535	B4DIR7;Q8IVX7;Q99504	0.47817	J3QKT4;P32322-2;P32322;B4DMU0;J3QL24;J3KQ22;E2QRB3;J3QR88;J3QLK9;J3QL23;J3QL32	0.65185
B4DZI8;P35606;D6R997;D6RBZ7;D6RCL6;D6RBG7;D6RBT6;H0YAC7	1.0903	B4DNF9;P11802;F8VXD2;F8VYH9;F8VZZ0;F8VTV8;F8VWX7;F8VZ51;F8VZ13	0.75195	E9PGZ4;B4DK71;Q9NTJ5;F8WDN7;C9J3E3;F8WD07;C9JV50	1.0966	B4DFA2;I3L0N3;P46459;I3L2G1;I3L0L3;K7EQD6	1.0544	Q9C005;B4DIS3	1.0087	B4DMV3;H7C5G1;Q2TAA2	NaN
P11234;P11233;Q6ZS74;B4E040	NaN	Q9Y3F4;B4DNJ6;B0AZV0;H0YH33	1.0227	C9J0K6;B4DKK2;P30626-2;P30626;B4DHQ6	0.95669	E7EPW2;B4DQG6;B4DFJ5;P82663	0.88791	Q92990-2;B4DJ85;Q92990	1.0507	J3QL05;J3KP15;B4DN89;Q01130;Q9BRL6-2;Q9BRL6	0.9557
P51570;B4E1G6;K7ERJ9	0.68415	J3KRJ2;J3KRF8;Q96GD4-3;J3QR41;J3KTD6;J3QLN8;B4DNM4;Q96GD4-2;Q96GD4;J9JID1	0.63524	Q9H8Y8;B4DKT0;Q9H8Y8-2	0.83733	J3QKS7;C0IMW7;C0IMW5;B4DFR4;Q969G3-2;C0IMW4;B4DGM3;Q969G3;J3KT85;J3QR61;K7EMQ8;J3QKX6;H7C048	1.0133	B4DJP7;P62318;H3BT13	1.0434	H0YDR7;B4DNB4;Q14181	0.66875
B4E1K7;Q9UJZ1;F2Z2I8	1.6094	B4DP11;Q15185;B4DP21;B4DDC6;B4DHP2	1.002	H7C3H1;F5H7D9;B4DKZ7;Q86YP4-2;Q86YP4;B5MC40;Q8WXI9	1.3691	B4DGL8;G3XAC4;O75027;O75027-2	0.87043	B4DJV2;O75390;H0YIC4;H0YH82;F8VRP1;F8VX68;F8VPF9;F8VPA1;F8W1S4;F8VRI6;F8VTT8;F8W4S1;F8W642;F8VZK9;F8VX07;F8VVF6;F8VR34;F8VWQ5;F8VU34	0.99725	Q9Y3F4;B4DNJ6;B0AZV0;H0YH33	1.0058
B4E241;P84103	0.99164	C9J168;B4DP31;Q14558;Q14558-2	1.7622	B4DL14;P36542-2;P36542	1.0612	P27824;B4DGP8;B4E2T8;H0Y9Q7;D6RAU8;D6RB85;D6RDP7;D6RAQ8;D6RFL1;D6RGY2;D6RHJ3;D6RD16;H0Y9H1	1.0019	J3KN15;B4DJV5;Q13610	0.994	B4DP21;B4DP11;Q15185;B4DDC6;B4DHP2	0.99997
B4E2D3;Q9UKX7-2;Q9UKX7	1.3565	B4DQ51;P45954	1.0913	B4DLN1;P52815;B4E1E9;Q9UBX3;Q9UBX3-2;I3L1E8	1.0035	B4DIR7;Q8IVX7;Q99504	NaN	E9PGZ4;B4DK71;Q9NTJ5;F8WDN7;C9J3E3;F8WD07;C9JV50	1.1064	B4DQ51;P45954	1.2315
C9JA28;Q9UNL2;B4E2P2	0.97515	B4DQI6;B4DUA9;Q13595;Q13595-2	1.1272	M0R3D6;M0R1A7;M0R117;B4DM74;Q02543;M0R0P7	1.4382	Q9C005;B4DIS3	0.95056	C9J0K6;B4DKK2;P30626-2;P30626;B4DHQ6	0.99126	B4DQI6;B4DUA9;Q13595;Q13595-2	0.95679
B5MD38;B4E2W0;F5GZQ3;P55084	0.88288	B4DQJ8;P52209;F5H7U0;K7EM49;K7EMN2;K7EPF6;K7ELN9	1.1263	J3KQP6;H3BMH2;B4DT13;B4DMK0;H3BSC1;P62491;Q15907;B4DQU5;P57735	1.0111	Q92990-2;B4DJ85;Q92990	1.1013	Q9H8Y8;B4DKT0;Q9H8Y8-2	0.80068	B4DQJ8;P52209;F5H7U0;K7EM49;K7EMN2;K7EPF6;K7ELN9	1.0205
B4E363;Q9Y285;K7ER16;K7ER00;K7EK06	0.93654	H7C3D3;B4DQX7;B4DQR8;H0Y2Y8;Q15942	0.95889	P32322-2;P32322;B4DMU0;J3QL24;J3QKT4;J3KQ22;E2QRB3;J3QR88;J3QLK9;J3QL23;J3QL32;J3KTA8;J3QKT3;J3QRZ0	0.86747	B4DJC7;O75569-3;O75569-2;O75569	0.59029	B4DLN1;P52815;B4E1E9;Q9UBX3;Q9UBX3-2;I3L1E8	0.9851	G3V2V8;B4DQV7;J3KMY5;P61916;H0YIZ1;G3V3E8;E7EMS2;G3V3D1	0.69304
B5MC59;P35244	NaN	G3V2V8;B4DQV7;J3KMY5;P61916;H0YIZ1;G3V3E8;E7EMS2;G3V3D1	0.90487	J3QL05;J3KP15;B4DN89;Q01130;Q9BRL6-2;Q9BRL6	0.97243	B4DJP7;P62318;H3BT13	1.0063	B4DMK0;Q15907;J3KQP6;H3BMH2;B4DT13;H3BSC1;P62491;B4DQU5;M0R2D0;P57735	0.97561	E9PP00;Q9C0D7;B4DR47	5.5121
G5E9R5;B5MCC7;P24666;F2Z2Q9;D3YTI2;P24666-3;P24666-2	1.4982	Q99879;Q99877;Q93079;Q5QNW6;P62807;P58876;O60814;Q5QNW6-2;B4DR52;P57053	0.94462	B4DNE4;G3V1Q4;Q16181-2;E7ES33;E7EPK1;Q16181;H0Y3Y4;H0YFF6;Q5JXL7;F5GZE5;Q6ZU15	1.0251	Q9UNH7-2;B4DJS7;Q9UNH7;G3V5X9	0.97068	J3QKT4;P32322-2;P32322;B4DMU0;J3QL24;J3KQ22;E2QRB3;J3QR88;J3QLK9;J3QL23;J3QL32	0.87533	Q99879;Q99877;Q93079;Q5QNW6;P62807;P58876;O60814;Q5QNW6-2;B4DR52;P57053	1.0212
B5MCE7;Q75MG1;B5MCH7;E7ETZ4;Q9Y6E2	0.93075	P61619;B4DR61;H7C1Q9;C9JXC6;H7C069;A6NK38;F2Z2C7;A6NIF9;C9JJV4;P61619-3;F8W776;Q8TC24;Q9H9S3-2;Q9H9S3-3;Q9H9S3	0.91641	Q9Y3F4;B4DNJ6;B0AZV0;H0YH33	1.0209	B4DJV2;O75390;H0YIC4;F8VTT8;F8W4S1;H0YH82;F8VRP1;F8VX68;F8VPF9;F8VPA1;F8W1S4;F8W642;F8VZK9;F8VX07;F8VWQ5;F8VVF6;F8VRI6;F8VU34;F8VR34;F8W0J2;F8VP03	1.0142	B4DMV3;H7C5G1;Q2TAA2	1.4415	P61619;B4DR61;P61619-3	0.74733
B7Z254;Q15084;F8WA83;B5MCQ5;Q15084-2	0.98611	Q02809;B4DR87	14.271	J3KRJ2;J3KRF8;Q96GD4-3;J3QR41;J3KTD6;J3QLN8;B4DNM4;Q96GD4-2;Q96GD4;J9JID1	0.71379	C9J0K6;B4DKK2;P30626-2;P30626;B4DHQ6	0.985	J3QL05;J3KP15;B4DN89;Q01130;Q9BRL6-2;Q9BRL6	0.96016	Q02809;B4DR87	1.0179
B5MCX3;Q15019;Q15019-2;C9J2Q4;C9IY94;C9J938;H7C310;C9JB25;B5MD47;C9IZU3;C9JQJ4;H7C2Y0	0.97921	B4DT35;Q7Z3B4;Q7Z3B4-2;E7EUM5	0.67087	B4DP11;Q15185;B4DP21;B4DDC6;B4DHP2	1.0349	Q9H8Y8;B4DKT0	0.81354	Q9Y3F4;B4DNJ6;B0AZV0;H0YH33	1.0188	D6RH20;G5EA06;Q92552;B4DRT2	0.86169
P62826;B5MDF5;J3KQE5;F5H018;B4DV51;H0YFC6	1.0627	B4DT77;P20073-2;P20073	1.2439	B4DQ14;F8WAE5;Q9BY44;B4DF96;H7C5Q3;C9IZE1;Q9BY44-2;H7C5R5	1.0539	H7C3H1;F5H7D9;B4DKZ7;Q86YP4-2;Q86YP4;B5MC40	0.8682	H7C0I5;H0YGN5;B4DNL7;Q9Y697-2;Q9Y697-3;Q9Y697	0.7345	B4DS49;H7BZN3;Q5UIP0-2;Q5UIP0	1.4325
H3BRV0;Q99613;B5ME19;H3BPE3;H3BPE4;H3BTY8	1.2244	K7EMZ9;B4DTG6;Q8ND56-2;Q8ND56	NaN	B4DQ51;P45954	0.92238	B4DLN1;P52815;B4E1E9;Q9UBX3;Q9UBX3-2;I3L1E8	1.0147	J3KRJ2;J3KRF8;Q96GD4-3;J3QR41;J3KTD6;J3QLN8;B4DNM4;Q96GD4-2;Q96GD4;J9JID1	0.66762	B4DSN5;P18031	1.0058
B7Z1I0;B7Z418;Q13418	NaN	B4DU75;B4DXK8;Q8TED0;H0Y8P4	0.7076	B4DQI6;B4DUA9;Q13595;Q13595-2	0.966	Q7Z721;B4DLT4;P23443-2;F6UYM1;P23443	0.62568	H7BXK7;C9J7N5;B4DNT0;P50452-2;P50452;P50453;P30740;O75830	0.80925	B4DT35;Q7Z3B4;Q7Z3B4-2;E7EUM5	0.7768
C9JA36;B7Z1N7;P54709;H7C4L9;C9JXZ1	0.86647	Q13126-4;Q13126;B4DUC8;Q13126-3;Q13126-2;Q13126-7;J3QSB7;Q13126-6;Q13126-5;J3KRN1;F2Z2F3	0.79261	B4DQJ8;P52209;F5H7U0;K7EM49;K7EPF6;K7EMN2;K7ELN9	1.0807	B4DMK0;Q15907;J3KQP6;H3BMH2;B4DT13;H3BSC1;P62491;M0R2D0;B4DQU5;P57735	0.97737	B4DP11;Q15185;B4DP21;B4DDC6;B4DHP2	1.0163	B4DT77;P20073-2;P20073	0.94682
B7Z1R5;P38606;C9JA17;C9JVW8	1.1668	B4DUI3;F5H425;O75822	1.3778	B4DQX7;B4DQR8;H0Y2Y8;Q15942;H7C3D3	0.85724	P32322-2;P32322;B4DMU0;J3QL24;J3QKT4;J3KQ22;E2QRB3;J3QLK9;J3QL23;J3QL32;J3KTA8;J3QKT3;J3QRZ0;J3QR88	0.82313	B4DP17;P62633-3;P62633-2;P62633;P62633-5;P62633-4;P62633-6	1.0787	B4DU75;B4DXK8;Q8TED0;H0Y8P4	0.93379
B7Z3K3;G3V1R9;Q9NPH2-2;Q9NPH2-3;Q9NPH2;J3QS51	0.85332	F8VSC4;G3V1U3;B4DUX5;P50579	0.92397	Q99879;Q99877;Q93079;Q5QNW6;P62807;P58876;O60814;Q5QNW6-2;B4DR52;P57053;Q99880;Q96A08	0.95161	B4DMV3;H7C5G1;Q2TAA2	0.72211	C9J168;B4DP31;Q14558;Q14558-2;C9JUN4	0.48106	Q13126-4;Q13126;B4DUC8;Q13126-3;Q13126-2;Q13126-7;J3QSB7;Q13126-6;Q13126-5;F2Z2F3	0.91956
B7Z403;Q9HC38-2;Q9HC38;I3L1I0;Q9HC38-3;I3L3Q4	0.77868	Q15717;B4DVB8;M0QZR9;M0R055	1.026	P61619;B4DR61;H7C1Q9;C9JXC6;H7C069;A6NK38;F2Z2C7;A6NIF9;C9JJV4;P61619-3;F8W776;Q8TC24;Q9H9S3-2;Q9H9S3-3;Q9H9S3	0.89391	J3QL05;J3KP15;B4DN89;Q01130;Q9BRL6-2;Q9BRL6	0.98923	H0YBZ9;B4DP61;Q16637-4;Q16637-2;Q16637-3;Q16637;E7EQZ4	0.66904	B4DUI3;F5H425;O75822	0.70833
Q9BUJ2-3;Q9BUJ2-4;B7Z4B8;Q9BUJ2-2;Q9BUJ2;M0QYZ0;M0R3F1;M0R203;M0QZV6;M0R0K8	0.8913	B4DVE7;P50995;H0Y6E1	0.95694	Q02809;B4DR87	1.2793	B4DNE4;G3V1Q4;Q16181-2;E7ES33;E7EPK1;Q16181;H0Y3Y4;H0YFF6;F5GZE5;Q5JXL7;Q6ZU15	0.92805	B4DQ14;F8WAE5;Q9BY44;B4DF96;C9IZE1;H7C5Q3;Q9BY44-2;H7C5R5;F8WF18;F8WAT3	0.83908	B4DUN1;P18615;B4DYX9;A2ABK4;E9PD43;A2ABK2;A2ABK1	0.77508
H7C2W9;C9JU56;B7Z4E3;P62899-3;P62899;P62899-2;B7Z4C8;B8ZZK4	0.94244	B4DVY1;O15371;B0QYA5;B0QYA4;B0QYA3;B0QYA6;B0QYA7;B0QYA8	1.1134	B4DSN5;P18031	1.1314	Q9Y3F4;B4DNJ6;B0AZV0;H0YH33	1.0249	B4DQ51;P45954	1.1747	B4DUS9;O95861;O95861-2;A6NF51;F8VZG4;F8W1J0;B4DPS5;F8VVW8;F8VRY7	1.0023
B7Z4S1;P23193;E5RK46;E5RFI1;E5RJ93;E5RIS7;Q5JRI7;P23193-2;Q15560	0.86154	B4DWJ2;P47897;C9J165;H7C0R3;B7Z840;C9JSG9;F2Z2V6	0.99065	B4DSY9;E7EVD1;O43395	1.1025	H7C0I5;H0YGN5;B4DNL7;Q9Y697-2;Q9Y697-3;Q9Y697	0.92283	F6RU00;B4DQA8;K7EJC8;E9PCW1;O95249	0.89262	B4DUV6;Q9UJA5	2.8231
B7Z5E2;P35998	0.94123	B4DZG7;B4DWW1;P40616;F8VYN9	0.64772	B4DT35;Q7Z3B4;Q7Z3B4-2;E7EUM5	0.91082	J3QR41;J3KTD6;J3QLN8;B4DNM4;Q96GD4-2;Q96GD4;J9JID1;J3KRJ2;J3KRF8;Q96GD4-3;J3KT86	0.87761	B4DQI6;B4DUA9;Q13595;Q13595-2	1.0182	F8VRR3;G3XA91;B4DUX5;F8VQZ7;P50579;F8VZX9;F8VY03;G3V1U3	0.95935
B7Z6A8;Q9NUJ1;C9IZX5	1.152	B4DX52;P25685;M0R080	0.76091	B4DT77;P20073-2;P20073	1.0225	B4DP11;Q15185;B4DP21;B4DDC6;B4DHP2	1.0204	B4DQJ8;P52209;F5H7U0;K7EM49;K7EMN2;K7EPF6;K7ELN9	1.0253	Q15717;B4DVB8;M0QZR9;M0R055	1.0284
F8VZV5;F8W1R7;P60660-2;P60660;J3KND3;G8JLA2;G3V1V0;B7Z6Z4;F8VPF3;G3V1Y7;F8VZU9;F8W1I5;F8W180;P14649	0.97332	F5H3I4;B4DXP9;P61163	0.9064	B4DTG6;Q8ND56-2;Q8ND56;I3L4Q1;K7EMZ9	1.2888	C9J168;B4DP31;Q14558;Q14558-2	NaN	B4DQX7;B4DQR8;H0Y2Y8;Q15942;C9JJK5;H7C3D3	0.70379	B4DVE7;P50995;H0Y6E1	1.0058
B7Z7E9;P17174	0.62823	C9JZE0;C9JY20;E7EU85;E9PFF5;P51114-3;P51114-2;B4DXZ6;P51114	0.8446	B4DU75;B4DXK8;Q8TED0;H0Y8P4	0.88665	B4DQ14;F8WAE5;Q9BY44;B4DF96;C9IZE1;H7C5Q3;Q9BY44-2;H7C5R5	0.914	G3V2V8;B4DQV7;J3KMY5;P61916;H0YIZ1;G3V3E8;E7EMS2;G3V3D1	0.62456	B4DVY1;O15371;B0QYA5;B0QYA6;B0QYA7;B0QYA8;B0QYA4;B0QYA3	0.94128
K7EIJ4;F5H4C2;B7Z7F3;Q9H6Z4-3;Q9H6Z4-2;Q9H6Z4	0.82846	B4DY35;B9A062;Q7Z650;B8ZZU9;P13995	0.88441	Q13126-4;Q13126;B4DUC8;Q13126-3;Q13126-2;Q13126-7;J3QSB7;Q13126-6;Q13126-5;J3KRN1;F2Z2F3	0.85672	B4DQ51;P45954	1.0902	Q99879;Q99877;Q93079;Q5QNW6;P62807;P58876;O60814;Q5QNW6-2;B4DR52;P57053	0.99077	B4DWJ2;P47897;H7C0R3;B7Z840;C9J165;F2Z2V6;C9JSG9	1.04
B7Z7Z8;Q13451	1.1073	Q9H0D6-2;B4DZC3;Q9H0D6	0.69708	B4DUS9;O95861;A6NF51;O95861-2;F8VVW8;F8VZG4;F8W1J0;B4DPS5	0.77972	B4DQI6;B4DUA9;Q13595;Q13595-2	1.0072	P61619;B4DR61;H7C1Q9;C9JXC6;H7C069;A6NK38;F2Z2C7;A6NIF9;C9JJV4;F8W776;Q8TC24;Q9H9S3-2;Q9H9S3-3;Q9H9S3;P61619-3	0.86365	B4DZG7;B4DWW1;P40616;F8VYN9	0.89984
H3BND8;F5H8E5;B7Z815;Q93009;F5H2X1	0.87541	B4DZI8;P35606;D6R997;D6RBZ7;D6RCL6;D6RBG7;D6RBT6;H0YAC7	0.99951	G3V1U3;B4DUX5;P50579;F8VSC4;F8VQZ7;F8VY03;F8VRR3;G3XA91	0.88813	B4DQJ8;P52209;F5H7U0;K7EM49;K7EPF6;K7EMN2;K7ELN9	0.98049	Q02809;B4DR87	0.92517	B4DX52;P25685;M0R080	0.84122
E9PGG1;E7EU01;E7EUM4;E7ERR6;E7ERH4;E7ET01;E7ETL8;E7EQU2;E7ESD3;E7EMU4;E7EV09;E7EQL5;Q13409-6;Q13409-3;B7ZA04;Q13409-2;Q13409-5;Q13409;F8W8S0	NaN	B4DZT4;E7EP00;P53992;G5EA31	2.8255	Q15717;B4DVB8;M0QZR9;M0R055	1.12	Q9HCN4-3;Q9HCN4-2;Q9HCN4-4;Q9HCN4;B4DQM4	0.97702	Q5R363;B4DS61;Q96SB4;H3BLV9;Q96SB4-3;H7C2I2;H7C521;H7C5L6;Q9UPE1-2;A8MPP7;Q9UPE1-3;A8MPY5;Q9UPE1-4;Q9UPE1;E7ETV6;P78362;P78362-2	0.74387	E7EU85;E9PFF5;P51114-3;P51114-2;B4DXZ6;P51114;C9JZE0;C9JY20;F8W871	1.2649
K7ES31;K7EMQ9;K7ERF1;B7ZAM9;Q9UBQ5;K7EQM4	1.0936	P11234;P11233;Q6ZS74;B4E040;F8WEQ6;C9JPE8;C9JYR1;H7C3P7;C9J6B1;C9JQB3	1.5279	B4DVE7;P50995;H0Y6E1	1.0227	G3V2V8;B4DQV7;J3KMY5;P61916;H0YIZ1;G3V3E8;E7EMS2;G3V3D1	0.75352	Q5T8U9;B4DSD4;Q5T8V1;Q8N4J0	NaN	G3V4W0;B4DY08;P07910-2;P07910-4;P07910-3;G3V2D6;G3V5V7;G3V5X6;G3V3K6;G3V251;O60812;B4DSU6;G3V4M8;G3V2H6	1.0117
Q15020-3;F8W667;Q15020-2;F8VV04;B7ZKM0;Q15020	0.74622	Q9P289-2;Q8NBY1;Q9P289;B4E0Y9;Q9P289-3;Q5JV98;H0Y630;B4DR80;Q9Y6E0-2;Q9Y6E0;Q5JV99;C9JDH9;C9J6L2;C9JCC0;C9J232;H7C279;B7Z9K1;A8K6Z3	0.99314	B4DVY1;O15371;B0QYA5;B0QYA4;B0QYA6;B0QYA7;B0QYA8;B0QYA3	1.091	Q99879;Q99877;Q93079;Q5QNW6;P62807;P58876;O60814;Q5QNW6-2;B4DR52;P57053;Q99880;Q96A08	0.96464	B4DSY9;E7EVD1;O43395	1.1014	B4DY35;B9A062;Q7Z650;B8ZZU9;P13995	0.88679
O94979-7;H7BXG7;O94979-6;O94979-3;B7ZL00;O94979-4;O94979-9;O94979-2;O94979;O94979-8;D6REX3;D6RHZ5;H0Y8W8;H0YAB3;O94979-5	0.93654	B4E1D7;Q9NVS9;J3QQV6;B4E0V0;B4E152	0.91163	B4DWJ2;P47897;H7C0R3;C9J165;B7Z840;C9JSG9;F2Z2V6	0.98562	P61619;B4DR61;H7C1Q9;C9JXC6;H7C069;A6NK38;F2Z2C7;A6NIF9;C9JJV4;F8W776;Q8TC24;Q9H9S3-2;Q9H9S3-3;Q9H9S3;P61619-3	0.8684	B4DT35;Q7Z3B4;Q7Z3B4-2;E7EUM5	0.96125	F5H4W0;B4DZ70;P48163	0.78129
F5H2E2;F5GWM7;Q7Z460-2;E7EUA5;B7ZLX3;F5GWS0;Q7Z460-3;F8WA11;Q7Z460	NaN	P51570;B4E1G6;K7ERJ9	1.2135	B4DZG7;B4DWW1;P40616;F8VYN9	0.63773	Q02809;B4DR87	0.93213	B4DT77;P20073-2;P20073	0.9745	Q9H0D6-2;B4DZC3;Q9H0D6	1.1117
B7ZMH9;Q56UN5-5;H7C041;Q56UN5-2;Q56UN5-3;Q56UN5	1.0679	B4E1K7;Q9UJZ1;F2Z2I8	0.92068	B4DX52;P25685;M0R080	0.98242	D6RH20;G5EA06;Q92552;B4DRT2	0.80531	B4DTG6;Q8ND56-2;Q8ND56;K7EMZ9	0.925	B4DZI8;P35606;D6R997;D6RBZ7;D6RCL6;D6RBG7;D6RBT6;H0YAC7	1.032
B8ZZJ0;B9A032;P63165;B8ZZN6	0.91195	B4E241;P84103	1.0021	B4DXG7;P52797	1.0369	Q5R363;B4DS61;Q96SB4;H3BLV9;Q96SB4-3;H7C2I2;D6RBF8;H7C521;H7C5L6;Q9UPE1-2;A8MPP7;Q9UPE1-3;A8MPY5;Q9UPE1-4;Q9UPE1;E7ETV6;P78362;P78362-2	0.76942	Q13126-4;Q13126;B4DUC8;Q13126-3;Q13126-2;Q13126-7;J3QSB7;Q13126-6;Q13126-5;F2Z2F3	1.0094	B4E016;Q96AT9-2;E7EW52;Q96AT9;F8WBT4;C9J6A7;C9JPQ7;Q53TV9;C9J9T0;C9IZU8	0.97286
B8ZZQ6;P06454-2;P06454;B8ZZA1;B8ZZW7;H7C2N1	1.0559	C9JA28;Q9UNL2;B4E2P2	1.0417	E7EU85;E9PFF5;P51114-3;P51114-2;B4DXZ6;P51114;C9JZE0;C9JY20;F8W871	0.90622	B4DT35;Q7Z3B4;Q7Z3B4-2;E7EUM5	1.0632	B4DUS9;O95861;O95861-2;A6NF51;F8VZG4;F8W1J0;B4DPS5;F8VVW8;F8VRY7	0.98813	P11234;P11233;Q6ZS74;B4E040	1.2484
J3KSH8;J3KT51;B8ZZT7;Q9UK76-3;F5GY98;Q9UK76;Q9UK76-2	1.0099	B7Z2R9;B4E2S7;P13473-2;P13473;P13473-3;H0YCG2	0.88689	G3V4W0;B4DY08;P07910-2;P07910-4;P07910-3;G3V2D6;G3V5V7;O60812;G3V5X6;G3V3K6;G3V251;B4DSU6;G3V4M8;G3V2H6;E5RG71;B3KT61;Q86SE5;G3V129	1.0135	B4DT77;P20073-2;P20073	1.0074	B4DUX5;P50579;G3V1U3;F8VQZ7;F8VRR3;G3XA91;F8VSC4;F8VY03;F8VZX9	0.76584	J3QQV6;B4E0V0;B4E1D7;Q9NVS9	0.91689
H7C463;C9J406;B9A067;Q16891-3;Q16891-2;Q16891	0.98041	B4E2W0;P55084;B5MD38;F5GZQ3;C9JEY0;C9JE81;C9K0M0	0.98144	F5H4C6;H0YFA9;F5H260;H7C3P4;B4DYH8;P15586;F6S8M0	0.65052	K7EMZ9;B4DTG6;Q8ND56-2;Q8ND56	0.72453	Q15717;B4DVB8;M0QZR9;M0R055	1.1144	Q9P289-2;Q8NBY1;Q9P289;B4E0Y9;C9JDH9;C9J6L2;C9JCC0;C9J232;Q5JV98;H7C279;B7Z9K1;A8K6Z3;Q9P289-3;H0Y630;B4DR80;O00506;Q9Y6E0-2;Q9Y6E0	1.1586
P27816-5;B9ZVR1;P27816-2;P27816-6;P27816;E7EVA0;B4DSQ1;H7C456;H0Y2V1;H7C4C5;F8W9U4;P27816-4;E9PGM5;P27816-7;B5MEG9	1.0185	B4E2W7;Q9NVT9	1.7351	B4DZI8;P35606;D6R997;D6RBZ7;D6RCL6;D6RBG7;D6RBT6;H0YAC7	1.0901	B4DU75;B4DXK8;Q8TED0;H0Y8P4	1.0538	B4DVE7;P50995;H0Y6E1	1.0424	P51570;B4E1G6;K7EII7	0.75627
I3L2Z5;C6G496;P56270;P56270-2;H3BQI4;I3L411;H3BPU3;I3L4Y2;I3L0V8;I3L0M3;H3BQS2;H3BQD6	0.98194	B4E318;Q9P287-4;Q9P287-3;Q9P287;Q9P287-2	1.1714	B4E016;Q96AT9-2;E7EW52;Q96AT9;F8WBT4;C9J6A7;C9JPQ7;Q53TV9;C9J9T0;C9IZU8	0.99495	Q13126-4;Q13126;B4DUC8;Q13126-3;Q13126-2;Q13126-7;J3QSB7;Q13126-6;Q13126-5;F2Z2F3	0.97305	H3BV01;H3BQT9;J3KRT1;B4DVG8;Q92620	0.67599	B4E1K7;Q9UJZ1;F2Z2I8	0.94704
Q15008;C9IZE4;E9PHI9;Q6UV22;C9J7B7;C9J0E9;H7C531	0.94463	B4E329;O60256-2;O60256;C9JDU5;C9JJS3;C9K0K7;I3L0S1;E7EPA1;O60256-3;C9JDH0;I3L4G9;E7EW35	0.93225	J3QQV6;B4E0V0;B4E1D7;Q9NVS9	0.96843	B4DUV6;Q9UJA5-3;Q9UJA5-2;Q9UJA5	1.4846	B4DVY1;O15371;B0QYA5;B0QYA4;B0QYA6;B0QYA7;B0QYA8;B0QYA3	1.0323	B4E241;P84103	0.9035
C9IZG4;C9IZQ5;O60888-3;O60888;O60888-2	0.85854	K7ER16;B4E363;Q9Y285;K7EK06;K7ER00	1.1716	Q9P289-2;Q8NBY1;Q9P289;B4E0Y9;Q9P289-3;C9JDH9;C9J6L2;C9JCC0;C9J232;Q5JV98;H7C279;B7Z9K1;A8K6Z3;H0Y630;B4DR80;O00506;Q9Y6E0-2;Q9Y6E0	1.0009	G3V1U3;B4DUX5;P50579;F8VSC4;F8VQZ7;F8VY03;F8VRR3;G3XA91	0.80618	B4DWJ2;P47897;H7C0R3;C9J165;B7Z840;C9JSG9;F2Z2V6	1.034	B4E2D3;Q9UKX7-2;Q9UKX7	0.94221
F8WAS3;C9IZN5;H7BYD0;Q5H9R2;Q16718	0.83812	C9K0P9;I3L0M7;I3L2W9;B4E3E5;Q92997;I3L2N2;O14641	0.55203	P51570;B4E1G6;K7ERJ9;K7ERN9;K7EII7	1.1345	Q15717;B4DVB8;M0QZR9;M0R055	1.0821	B4DWL3;P11279	1.2141	C9JA28;Q9UNL2;B4E2P2	0.98041
C9J712;C9J0J7;C9JQ45;P35080-2;P35080;G5E9Q6	NaN	B5LY68;P11172;P11172-2;E9PFD2	0.75373	B4E1K0;Q02241-2;H7BYN4;Q02241	0.9176	B4DVE7;P50995;H0Y6E1	0.99984	B4DZG7;B4DWW1;P40616;F8VYN9	0.76398	B7Z2R9;B4E2S7;P13473-2;P13473;P13473-3;H0YCG2	0.87699
C9J1E1;P53004	0.90852	B5MCY6;Q15435-4;B5MBZ8;Q15435-3;C9JD73;C9J177;Q15435-2;H7C003;Q15435	0.73997	B4E1K7;Q9UJZ1;F2Z2I8	1.0474	B4DVY1;O15371;B0QYA5;B0QYA4;B0QYA3;B0QYA6;B0QYA7;B0QYA8	1.0337	B4DX67;Q5T911;Q9NPJ6	NaN	B4E2W0;P55084;F5GZQ3;B5MD38;C9JEY0;C9JE81;C9K0M0	0.99006
K7EN71;K7ERB2;C9J1E7;Q7Z451;Q10567-4;P63010;Q10567-3;Q10567-2;Q10567;P63010-2;K7EJX1;K7EJT8	0.74149	G5E9R5;B5MCC7;P24666;F2Z2Q9;D3YTI2;P24666-3;P24666-2	1.1648	B4E241;P84103	1.0237	B4DW73;Q16822;B4DT64;H0YML5;H0YM31;P35558	0.59192	B4DXK8;Q8TED0;H0Y8P4;B4DU75	1.0908	B4E2W7;Q9NVT9	0.90853
O43324-2;D6RBD7;C9J1V9;O43324;D6RCQ0;H0YAL7	0.91018	B7Z254;Q15084;F8WA83;B5MCQ5;Q15084-2	1.0209	C9JA28;Q9UNL2;B4E2P2	0.99625	B4DZG7;B4DWW1;P40616;F8VYN9	0.68975	E7EU85;E9PFF5;P51114-3;P51114-2;B4DXZ6;P51114;C9JZE0;C9JY20	0.87586	B4E329;O60256-2;O60256;I3L0S1;E7EPA1;O60256-3;I3L4G9;C9JDU5;C9JJS3;C9K0K7;C9JDH0;E7EW35	0.9485
C9J2P0;K4DI90;P51965	0.94168	B5MD87;H0Y6C3;Q53H96	0.94887	B7Z2R9;B4E2S7;P13473-2;P13473;P13473-3;H0YCG2	0.95922	B4DX67;Q5T911;Q9NPJ6	NaN	G3V4W0;B4DY08;P07910-2;P07910-4;P07910-3;G3V2D6;G3V5V7;G3V5X6;G3V3K6;G3V251;O60812;B4DSU6;G3V4M8;G3V2H6;E5RG71;B3KT61;Q86SE5;G3V129	1.0064	C9K0P9;I3L0M7;I3L2W9;B4E3E5;Q92997;I3L2N2;O14641	0.68357
C9J4M6;C9J2Y9;P30876	1.0748	P62826;B5MDF5;J3KQE5;F5H018;B4DV51;H0YFC6	0.95179	B4E2W0;P55084;F5GZQ3;B5MD38;C9JEY0;C9JE81;C9K0M0	1.0873	Q96KB5;B4DX68;E5RFX4;E5RIE1	NaN	B4DY35;B9A062;Q7Z650;B8ZZU9;P13995	0.91867	B5MCW9;Q9HC35;B5MBZ0;F2Z2B5	0.80718
H7C497;C9JRH2;C9JMJ4;C9J3R0;C9JQZ4;C9JW69;P18754;P18754-2	1.121	P12814-2;P12814;P12814-3;B7TY16;H9KV75;G3V2W4;G3V2N5;H7C5W8;P35609;B2RCS5;H0YJ11;Q08043;G3V2X9;H0YJW3;G3V2E8;G3V5M4;B7Z4P8	1.0164	B4E329;O60256-2;O60256;C9JDU5;C9JJS3;C9K0K7;I3L0S1;E7EPA1;O60256-3;C9JDH0;I3L4G9;E7EW35	0.87681	E7EU85;E9PFF5;P51114-3;P51114-2;B4DXZ6;P51114;C9JZE0;C9JY20	0.96529	F5H4C6;F5H260;H7C3P4;B4DYH8;P15586;F6S8M0;H0YFA9	0.93618	B5MCY6;Q15435-4;B5MBZ8;Q15435-3;C9JD73;C9J177;Q15435-2;H7C003;Q15435	0.71325
C9JUA8;C9JBJ6;C9J413;C9JLU1;P52434	NaN	Q5JB52;B7WPG3;Q8WVV9-4;Q8WVV9;D6W592	0.99985	Q9HC35;B5MBZ0;B5MCW9;F2Z2B5	1.1505	G3V4W0;B4DY08;P07910-2;P07910-4;P07910-3;G3V2D6;G3V5V7;G3V251;O60812;G3V5X6;G3V3K6;B4DSU6;G3V4M8;G3V2H6;E5RG71;B3KT61;Q86SE5;G3V129	1.0131	B4DZ70;P48163;F5H4W0	0.92808	G5E9R5;B5MCC7;P24666;F2Z2Q9;D3YTI2;P24666-3;P24666-2	1.0094
M0R0A1;C9J4Z3;Q6P4E4;E9PEL3;M0R2L6;P61513;G5E9R3;A6NKH3	0.99614	C9JA36;B7Z1N7;P54709;H7C4L9;C9JXZ1	0.90816	B5MCY6;Q15435-4;B5MBZ8;Q15435-3;C9JD73;C9J177;Q15435-2;H7C003;Q15435	1.0058	B4DY35;B9A062;Q7Z650;B8ZZU9;P13995	0.69833	B4DZ96;Q3SXZ7	1.0338	B5MCE7;B5MCH7;E7ETZ4;Q9Y6E2;Q75MG1	0.94673
E5RK35;P55327-2;P55327-4;P55327;D0UFD3;C9J502;D0UFD1;P55327-3;F5H0B0	NaN	B7Z1R5;P38606;C9JA17;C9JVW8	0.95877	B5MCE7;B5MCH7;E7ETZ4;Q9Y6E2;Q75MG1	1.2612	B4DZG6;Q9BTX1-4;G3XA81;Q9BTX1-2;Q9BTX1	NaN	B4DZI8;P35606;D6R997;D6RBZ7;D6RCL6;D6RBG7;D6RBT6;H0YAC7	1.0323	B7Z254;Q15084;F8WA83;B5MCQ5;Q15084-2	0.93597
C9J8R8;C9J7C7;G5E9W8;P46976-3;C9JQ42;D3DNH0;P46976-2;P46976	NaN	P14927;P14927-2;B7Z2R2	1.303	B5MCF9;O00541-2;O00541;B3KXD6;C9JXJ1;H7C267	1.1109	B4DZI8;P35606;D6R997;D6RBZ7;D6RCL6;D6RBG7;D6RBT6;H0YAC7	1.0922	B4E016;Q96AT9-2;E7EW52;Q96AT9;F8WBT4;C9J6A7;C9JPQ7;Q53TV9;C9J9T0;C9IZU8	1.1711	B5MD87;H0Y6C3;Q53H96	1.2412
H7C3Z6;E7EX83;C9J840;H7C0P6;E7ENQ1;O95819-4;G3XAA2;H7C360;O95819-2;O95819;O95819-5;E7EN19;E7ESS2;O95819-3;G5E948	0.77508	B7Z341;F8WBF9;Q9UGV2-3;Q9UGV2-2;Q9UGV2;Q5TH30	1.3379	Q8NHH9-3;B5MCN0;B7Z7X8;Q8NHH9-4;Q8NHH9-2;Q8NHH9	1.3658	B4E016;Q96AT9-2;E7EW52;Q96AT9;F8WBT4;C9J6A7;C9JPQ7;Q53TV9;C9J9T0;C9IZU8	1.0365	Q9P289-2;Q8NBY1;Q9P289;B4E0Y9;Q9P289-3;C9JDH9;C9J6L2;C9JCC0;C9J232;Q5JV98;H7C279;B7Z9K1;A8K6Z3;H0Y630;B4DR80;O00506;Q9Y6E0-2;Q9Y6E0;Q5JV99	0.99284	P62826;B5MDF5;J3KQE5;F5H018;H0YFC6;B4DV51	1.0193
C9J8H9;C9JJT5;F8W7V3;P56134-2;F5H4H2;P56134;C9JU26;G3V325	0.97824	B7Z3K3;G3V1R9;Q9NPH2-2;Q9NPH2-3;Q9NPH2;J3KRH4;J3QS51	0.92926	B7Z254;Q15084;F8WA83;B5MCQ5;Q15084-2	0.9768	J3QQV6;B4E0V0;B4E1D7;Q9NVS9	0.96398	B4E1D7;Q9NVS9;B4E0V0;B4E152;J3QQV6	0.95368	P12814-2;P12814;P12814-3;B7TY16;H9KV75;G3V2W4;H0YJ11;H0YJW3;G3V2N5;H7C5W8;P35609;B2RCS5;Q08043;G3V5M4;G3V2X9;G3V380;G3V2E8;B7Z4P8	0.77783
C9JTT7;C9J8M3;C9JZI1;P35249;C9JXZ7;C9JGY5;F8WE44	0.72604	Q15813;B7Z3P1	NaN	B5MD87;H0Y6C3;Q53H96	0.94739	Q9P289-2;Q8NBY1;Q9P289;B4E0Y9;Q9P289-3	0.99115	P51570;B4E1G6;K7ERJ9;K7EII7	0.86883	B7Z1I0;B7Z418;Q13418	0.73784
C9J8Q5;P51649;P51649-2	0.52551	B7Z3X4;D6RAY7;D6R9P4;P46926;D6R917;D6RB13;E7EVU7;Q8TDQ7-3;Q8TDQ7-2;Q8TDQ7;D6RFF8	1.0824	P62826;B5MDF5;J3KQE5;F5H018;H0YFC6;B4DV51	0.97442	P51570;B4E1G6;K7EII7;K7ERJ9	0.94892	B4E1K0;Q02241-2;H7BYN4;Q02241	0.79039	C9JA36;B7Z1N7;P54709;H7C4L9;C9JXZ1	0.96678
Q14061;C9J8T6	0.8059	B7Z403;Q9HC38-2;Q9HC38;Q9HC38-3;I3L3Q4;I3L1I0	0.89151	P12814-2;P12814;P12814-3;B7TY16;H9KV75;G3V2W4;G3V2N5;P35609;B2RCS5;Q08043;G3V5M4;G3V2X9;H0YJ11;H0YJW3;H7C5W8;G3V2E8;G3V380;B7Z4P8	1.4932	B4E1K0;Q02241-2;H7BYN4;Q02241	0.80502	B4E241;P84103	0.9204	B7Z1R5;P38606;C9JA17;C9JVW8	0.94632
H0YGA2;D6RAW0;D6RA11;D6RFM0;Q9UQL0;P62837-2;D6RAH7;C9J9H9;H9KV45;Q9Y2X8;P62837;P61077;P51668;P61077-2;P61077-3	NaN	H0Y8F7;B7Z415;D6RGG7;P09417	NaN	B7Z1I0;B7Z418;Q13418	0.73835	B4E241;P84103	1.0013	B4E2J1;Q8NBU5;Q8NBU5-2	NaN	B7Z341;F8WBF9;Q9UGV2-3;Q9UGV2-2;Q9UGV2;Q5TH30	0.86162
C9J9K3;P08865;A6NE09;C9JQR9	1.0001	Q9BUJ2-4;B7Z4B8;Q9BUJ2-2;Q9BUJ2;M0R3F1;Q9BUJ2-3;M0QYZ0;M0R203;M0QYM5;M0QZV6;M0R0K8;M0QYI8	1.0709	B7Z1K2;B7Z524;H0YDX7;J3QT46;Q9Y450-4;Q9Y450;H0YES5	1.0163	P0C7W0-3;J3KRR4;B4E2F8;P0C7W0;P0C7W0-2	NaN	C9JA28;Q9UNL2;B4E2P2	1.0434	B7Z3K3;G3V1R9;Q9NPH2-2;Q9NPH2-3;Q9NPH2;J3QS51	0.86458
C9JE21;C9JAA9;Q9NW13-2;Q9NW13	1.0104	Q5T3R7;B7Z7A3;Q9BZE4	1.0893	B7Z1R5;P38606;C9JA17;C9JVW8	0.97341	B4E2J1;Q8NBU5;Q8NBU5-2	1.0125	B7Z2R9;B4E2S7;P13473-2;P13473;P13473-3;H0YCG2	0.90448	B7Z3X4;D6RAY7;E7EVU7;D6R9P4;P46926;D6RFF8	1.0174
Q16629-3;Q16629-2;Q16629-4;C9JAB2;Q16629	0.95742	K7EIJ4;F5H4C2;B7Z7F3;Q9H6Z4-3;Q9H6Z4-2;Q9H6Z4	0.88186	B7Z341;F8WBF9;Q9UGV2-3;Q9UGV2-2;Q9UGV2;Q5TH30	0.99681	C9JA28;Q9UNL2;B4E2P2	1.0616	B4E2W0;P55084;B5MD38;F5GZQ3;C9JEY0;C9JE81;C9K0M0	1.0023	B7Z403;Q9HC38-2;Q9HC38;I3L1I0;I3L3Q4;Q9HC38-3	0.9705
C9JAJ9	8.8598	B7Z7Z8;Q13451	1.4014	B7Z358;Q8N5N7	1.3279	B4E2S7;P13473-2;P13473;P13473-3;H0YCG2;B7Z2R9	0.90062	B4E2W7;Q9NVT9	0.90252	Q9BUJ2-4;B7Z4B8;Q9BUJ2-2;Q9BUJ2;M0R3F1;Q9BUJ2-3;M0QYZ0;M0R203;M0QYM5;M0QZV6;M0R0K8;M0QYI8	1.085
C9JAK5;P18085;C9JPM4	0.95847	B7Z800;P55263-2;P55263	0.57899	B7Z3K3;G3V1R9;Q9NPH2-2;Q9NPH2-3;Q9NPH2;J3QS51;J3KRH4	0.82746	B4E2W0;P55084;F5GZQ3;B5MD38;C9JEY0;C9JE81;C9K0M0	1.0448	C9JVS0;C9JPY0;F8WAZ5;F2Z2B1;H7C1T3;C9J2E1;C9J050;B4E322;Q9Y5K3-2;Q9Y5K3-4;Q9Y5K3-3;P49585;Q9Y5K3;C9JEJ2	0.987	B7Z5N7;B7Z594;B7Z4U7;B7Z738;Q8WVM8	1.0507
C9JBI3;P78330	1.1746	H3BND8;F5H8E5;B7Z815;Q93009;F5H2X1	0.92746	Q15813;B7Z3P1	1.1854	C9K0P9;I3L0M7;I3L2W9;B4E3E5;Q92997;I3L2N2;O14641	0.71777	B4E329;O60256-2;O60256;E7EPA1;O60256-3;I3L4G9;C9JDU5;C9JJS3;C9K0K7;I3L0S1;C9JDH0;E7EW35	0.86869	P09493-5;F5H7S3;H7BYY1;H0YK48;B7Z596;H0YL80;H0YKX5;H0YKP3;H0YNC7;P09493-2;H0YL52;P09493-7;P09493-6;P09493-4;P09493-3;P09493;D9YZV8;D9YZV3;D9YZV2;Q6ZN40;H0YN06	0.56719
C9JD53;C9JKM8;Q13907;Q13907-2	1.7501	Q13409-6;Q13409-3;B7ZA04;Q13409-2;Q13409-5;Q13409;F8W8S0;E7EQL5;E9PGG1;E7EU01;E7EUM4;E7ERR6;E7ERH4;E7ET01;E7ETL8;E7EQU2;E7ESD3;E7EMU4;E7EV09	0.99721	B7Z3X4;D6RAY7;D6R9P4;P46926;E7EVU7;Q8TDQ7-3;Q8TDQ7;D6RFF8;D6R917;D6RB13;B4DJF3;Q2VYF1;Q8TDQ7-2	0.89316	B4E3L6	NaN	C9K0P9;I3L0M7;I3L2W9;B4E3E5;Q92997;I3L2N2;O14641	1.1231	H0YAW3;B7Z6B8;Q16698	0.8137
C9JDR0;Q15738	1.0954	K7ES31;K7EMQ9;K7ERF1;B7ZAM9;Q9UBQ5	1.3885	B7Z403;Q9HC38-2;Q9HC38;I3L3Q4;I3L1I0;Q9HC38-3	0.98929	B5MCW9;Q9HC35;B5MBZ0;F2Z2B5	1.0067	B5MCW9;Q9HC35;B5MBZ0;F2Z2B5	0.98702	B7Z6L5;Q9UGI8-2;Q9UGI8	0.90278
C9JTS3;C9JG97;Q13685;C9JEH3	1.2106	Q9NR46;B7ZC38;Q9NR46-2;F8WFB9;B7ZC39	1.0619	Q9BUJ2-4;B7Z4B8;Q9BUJ2-2;Q9BUJ2;Q9BUJ2-3;M0R3F1;M0QYZ0;M0R203;M0QZV6;M0R0K8;M0QYM5;M0QYI8	1.0047	B5MCY6;Q15435-4;B5MBZ8;Q15435-3;C9JD73;C9J177;Q15435-2;H7C003;Q15435	1.0932	B5MCY6;Q15435-4;B5MBZ8;Q15435-3;C9JD73;C9J177;Q15435-2;H7C003;Q15435	1.0033	B7Z6P0;H3BQR2;Q9Y5Y2	0.57357
C9JFE4;Q13098-5;Q13098;Q13098-7;Q13098-6	0.95175	F8VV04;B7ZKM0;Q15020;Q15020-3;F8W667;Q15020-2	0.92269	B7Z5R1;P31749	0.78801	B5MCF9;O00541-2;O00541;B3KXD6;H7C267;C9JXJ1	0.96491	B5MC98;Q9HCU5	1.083	F8W1R7;P60660-2;P60660;J3KND3;G8JLA2;G3V1V0;B7Z6Z4;F8VPF3;F8VZV5;G3V1Y7;F8VZU9;F8W180;F8W1I5;P14649;F8VXL3;H0YI43	0.92042
C9JFR7;P99999;CON__P62894	0.85997	O95487-2;O95487;B7ZKM8	1.6468	B7Z6B8;Q16698;H0YAW3;E5RJD2;E5RJG7;E5RFV2	1.1515	Q8NHH9-3;B5MCN0;B7Z7X8;Q8NHH9-4;Q8NHH9-2;Q8NHH9	NaN	B5MCF9;O00541-2;O00541;B3KXD6;H7C267;C9JXJ1	0.9766	B7Z7A3;Q9BZE4;Q5T3R7;B4DY13	0.95427
I3L4I3;I3L1P4;I3L4M7;I3L445;F8WDZ1;Q8IZL8;I3L3A8;C9JFV4;Q8IZL8-2	NaN	Q86UV5-4;Q86UV5-7;Q86UV5-3;Q86UV5-2;Q86UV5;B7ZKS7	1.3804	B7Z6I5;Q5QNY5;P40855-5;P40855;H0YJ60;H0YDY4;G3V3G9	1.3399	B7Z254;Q15084;F8WA83;B5MCQ5;Q15084-2	0.9701	Q8NHH9-3;B5MCN0;B7Z7X8;Q8NHH9-4;Q8NHH9-2;Q8NHH9	0.62201	B7Z7F3;Q9H6Z4-3;Q9H6Z4-2;Q9H6Z4;K7ENJ2;K7EID7;K7ENB9;K7EPW1;K7EIJ4;K7EJV3;F5H4C2	0.9967
C9JG87;Q9NYK5;Q9NYK5-2	9.3954	O94979-6;O94979-3;B7ZL00;O94979-4;O94979-9;O94979-2;O94979;O94979-8;D6REX3;O94979-7;H7BXG7;D6RHZ5;O94979-5;H0Y8W8;H0YAB3;H0YAF5;H0Y9T9;H0Y9K1;H0Y8V7	0.93961	B7Z6L5;Q9UGI8-2;Q9UGI8	1.1363	C9JHU6;C9JUM0;B7ZA47;B5MCU4;B7ZAJ5;Q9H6V9;Q9H6V9-2;B5MDU6	NaN	B7Z254;Q15084;F8WA83;B5MCQ5;Q15084-2	1.0146	B7Z7G2;J3QQX3;P22570;P22570-2;E7EQC1;P22570-3;J3QKZ8;G3V0F2;B4DQQ4;B4DX24	0.74093
P13798;C9JIF9	NaN	F5H2E2;F5GWM7;Q7Z460-2;E7EUA5;B7ZLX3;F5GWS0;Q7Z460-3;F8WA11;Q7Z460	NaN	F8W1R7;P60660-2;P60660;J3KND3;G8JLA2;G3V1V0;B7Z6Z4;F8VPF3;F8VZV5;G3V1Y7;F8VZU9;F8W180;F8W1I5;P14649;F8VXL3;H0YI43	1.0102	B5MD87;H0Y6C3;Q53H96	1.1237	B5MD87;H0Y6C3;Q53H96	1.1054	B7Z7Q6;P42785;P42785-2	0.78305
C9JIG9;O95747	0.91822	Q9ULU4-2;Q9ULU4-4;Q9ULU4-3;Q9ULU4-6;B7ZM62;H7C4X9;H7C0U2;Q9ULU4-8;Q2HXV1;Q9ULU4-14;Q2HXV3;Q9ULU4-12;Q9ULU4-9;Q9ULU4-5;Q9ULU4;J3KPU3;Q9ULU4-13;Q9ULU4-10;Q9ULU4-11;Q9ULU4-7;F5H0X3	0.90965	B7Z7A3;Q9BZE4;B4DY13;Q5T3R7	1.0062	B5MDC9	0.98401	P62826;B5MDF5;J3KQE5;F5H018;B4DV51;H0YFC6	1.0345	B7Z7Z8;Q13451	1.1527
F2Z2Y6;C9JIZ0;C9JNV3;O95777	5.6701	B7ZMH9;Q56UN5-5;H7C041;Q56UN5-2;Q56UN5-3;Q56UN5	1.031	K7EIJ4;F5H4C2;B7Z7F3;Q9H6Z4-3;Q9H6Z4-2;Q9H6Z4	1.188	P62826;B5MDF5;J3KQE5;F5H018;B4DV51;H0YFC6	1.008	P12814-2;P12814;P12814-3;B7TY16;H9KV75;G3V2W4;G3V2N5;P35609;B2RCS5;H7C5W8;H0YJ11;H0YJW3;Q08043;G3V2X9;G3V5M4;G3V2E8;G3V380;B7Z4P8	1.1121	B7Z800;P55263-2;P55263	0.96984
C9JJ47;Q96CW1-2;Q96CW1;E9PFW3;C9JJD3;C9JPV8;C9JTK4;C9JGT8	0.84951	B8ZZL3;O60573	0.91679	B7Z7G2;J3QQX3;P22570;P22570-2;E7EQC1;P22570-3;J3QKZ8;G3V0F2;B4DQQ4;B4DX24	0.61578	B5MDQ4;Q92600;B7Z1E5;F8WBZ6	1.2723	E9PQD8;H0YE25;H0YF25;B7Z1J9;E9PLI5;Q8NB37;Q8NB37-2	1.2799	B7Z806;P13807-2;P13807;F5H1N8;F5H3S3	1.147
C9JL85;P58546	1.0241	P63165;B8ZZN6;B8ZZJ0;B9A032;B8ZZ67;A8MUS8	0.97229	P48739;P48739-2;B7Z7Q0;B3KYB6;B3KYB7	0.88427	P12814-2;P12814;P12814-3;B7TY16;H9KV75;G3V2W4;G3V2N5;H7C5W8;H0YJW3;P35609;B2RCS5;H0YJ11;Q08043;G3V2X9;G3V5M4;G3V2E8;G3V380;B7Z4P8	0.99127	H0YES5;B7Z1K2;B7Z524;H0YDX7;J3QT46;Q9Y450-4;Q9Y450;E9PHZ9	0.91221	H3BND8;F5H8E5;B7Z815;Q93009;F5H2X1	1.0537
C9JXB8;C9JNW5;P83731	0.95423	B8ZZQ6;P06454-2;P06454;B8ZZA1;B8ZZW7;H7C2N1	1.0496	B7Z7Q6;P42785;P42785-2	1.2235	B7Z1I0;B7Z418;Q13418	0.96938	B7Z1R5;P38606;C9JA17;C9JVW8	0.95531	B7Z9I1;P11310;P11310-2;Q5T4U5;B4DJE7;H0YDT5;E9PJM9	1.0539
O60828-6;C9JQA1;O60828-3;O60828-2;O60828	0.98087	J3KT51;B8ZZT7;Q9UK76;Q9UK76-2;J3KSH8;Q9UK76-3;F5GY98	0.94746	B7Z7Z8;Q13451	1.384	E9PQD8;H0YE25;H0YF25;B7Z1J9;E9PLI5;Q8NB37;Q8NB37-2	1.4827	H0Y9C2;B7Z1Z6;H0Y6G2;H7BXS4;Q13554-7;Q8WU40;Q9UQM7;Q13557-8;Q13557-12;Q13554-4;Q9UQM7-2;Q13557-9;Q13557-10;Q13554-6;Q13555-10;Q13557-5;D6R938;Q13557;Q13554-3;Q13557-3;E9PBG7;Q13557-6;Q5SWX3;Q13554-8;Q13554-5;Q13557-4;Q13557-11;Q13555-3;Q13555-5;Q13555-4;Q13555-7;E9PF82;Q13555-9;Q13554-2;Q13555-2;Q13555-8;Q13555;Q13555-6;Q13554	1.4667	E7EQL5;Q13409-6;Q13409-3;B7ZA04;Q13409-2;Q13409-5;Q13409;F8W8S0;E9PGG1;E7EUM4;E7ERR6;E7ERH4;E7ET01;E7ETL8;E7EQU2;E7ESD3;E7EMU4;E7EV09;E7EU01	0.99003
G3V1K1;Q9NX63;C9JRZ6;F8WAR4	0.71914	H7C463;C9J406;B9A067;Q16891-3;Q16891-2;Q16891	1.0471	B7Z800;P55263-2;P55263	0.79144	H0YES5;B7Z1K2;B7Z524;H0YDX7;J3QT46;Q9Y450-4;Q9Y450;E9PHZ9	1.1146	Q9BXK5-2;B7Z238;Q9BXK5	1.3374	K7ES31;K7EMQ9;K7ERF1;B7ZAM9;Q9UBQ5;K7EQM4	0.63211
C9JSJ3	NaN	E7ERW8;O60610-2;B9ZVX0;E9PHQ0;O60610-3;E7ET75;E9PEZ3;O60610;H9KV28;E7EMV0	0.9451	B7Z806;P13807-2;P13807;F5H3S3;F5H1N8;P54840	0.79365	B7Z1R5;P38606;C9JA17;C9JVW8	0.96009	Q5T8E0;B7Z2A7;Q5T8D3-4;Q5T8D3-2;Q5T8D3-3;Q5T8D3	1.0141	B7ZBC9;B7ZBC8;O75449-2;O75449	1.0974
Q5JRX3-3;Q5JRX3;Q5JRX3-2;C9JSL2;H0Y7L7	0.88379	I3L2Z5;C6G496;P56270;P56270-2;H3BQI4;H3BQS2;H3BQD6;I3L411;H3BPU3;I3L4Y2;I3L0M3;I3L0V8	0.91453	H3BND8;F5H8E5;B7Z815;Q93009;F5H2X1	0.99166	B7Z341;F8WBF9;Q9UGV2-3;Q9UGV2-2;Q9UGV2;Q5TH30	1.1029	B7Z341;F8WBF9;Q9UGV2-3;Q9UGV2-2;Q9UGV2;Q5TH30	0.89944	B7ZKM0;Q15020;F8VV04;Q15020-2;Q15020-3;H0YHU8;F8W667	1.1039
Q86YJ6-5;C9JU10;Q86YJ6-3;Q86YJ6-2;Q86YJ6-4;Q86YJ6	NaN	C8C9T5;Q14318;Q14318-2;J3KQ73	1.0701	F5GXQ0;B7Z9G5;Q5VW32	0.85526	B7Z358;Q8N5N7	0.94128	B7Z358;Q8N5N7	0.99789	O94979-7;H7BXG7;O94979-6;O94979-3;B7ZL00;O94979-4;O94979-9;O94979-2;O94979;O94979-8;D6REX3;D6RHZ5;H0YAB3;H0Y9K1;H0Y8W8;O94979-5;H0YAF5;H0Y8V7	0.92172
Q63HR2-5;Q63HR2-2;F8VV64;C9JVR1;Q63HR2-6;Q63HR2;Q63HR2-4	0.55769	Q9H9M0;F8WAU4;C9IZ01;Q96RP9;Q96RP9-2	0.97726	B7Z9I1;P11310;P11310-2;Q5T4U5;B4DJE7;H0YDT5;E9PJM9	1.1962	B7Z3I9;P13716	1.079	B7Z403;Q9HC38-2;Q9HC38;I3L3Q4;I3L1I0;Q9HC38-3	0.94468	F5H2E2;F5GWM7;Q7Z460-2;E7EUA5;B7ZLX3;F5GWS0;Q7Z460-3;F8WA11;Q7Z460	0.8006
C9JYL7;H7C187;O14513-4;O14513-3;O14513-2;O14513	1.0966	Q15008;C9IZE4;E9PHI9;Q6UV22;C9J7B7;C9J0E9;H7C531	0.91047	Q13409-6;Q13409-3;B7ZA04;Q13409-2;Q13409-5;Q13409;F8W8S0;E7EQL5;E9PGG1;E7EUM4;E7ERR6;E7ERH4;E7ET01;E7ETL8;E7EQU2;E7ESD3;E7EMU4;E7EV09;E7EU01	0.96314	Q15813;B7Z3P1	0.96648	B7Z418;Q13418;B7Z1I0;E9PM54;E9PNR4	0.98966	Q53GS9-2;G5E9H0;B8ZZD1;B9A018;Q53GS9	0.76266
C9K025;P18077	0.82831	C9IZG4;O60888-3;O60888;O60888-2;C9IZQ5	1.113	K7ES31;K7EMQ9;K7ERF1;B7ZAM9;Q9UBQ5;K7EQM4	1.3722	B7Z403;Q9HC38-2;Q9HC38;I3L3Q4;I3L1I0;Q9HC38-3	0.98277	Q9BUJ2-4;B7Z4B8;Q9BUJ2-2;Q9BUJ2;M0R3F1;Q9BUJ2-3;M0QYZ0;M0QYM5;M0R0K8;M0QYI8;M0R203;M0QZV6	1.0315	B8ZZF8;Q9Y4Y9	0.95496
Q04637-5;E7EX73;Q04637-4;E9PGM1;Q04637-3;E7EUU4;Q04637;D3DNT2;E9PFM1;Q04637-6;G5E9S1;C9JF13;C9J6B6;H7C044;C9J2Z7;C9K073;F5H8J4;F5H564;Q504Z1;O43432;O43432-3;H7C0V6;F8WCF2;REV__C9JBJ8;C9JHW9;REV__Q8NEG2;REV__F5H7J8;REV__C9JQZ6;REV__J3KQX6	0.99728	P43307-2;F5H5Y2;C9J3L8;C9J5W0;P43307;E9PAL7;C9IZQ1	0.74289	Q9NR46;B7ZC38;Q9NR46-2;B7ZC39;F8WFB9	1.0561	Q9BUJ2-4;B7Z4B8;Q9BUJ2-2;Q9BUJ2;M0R3F1;Q9BUJ2-3;M0QYZ0;M0R203;M0QZV6;M0R0K8;M0QYI8;M0QYM5	1.0946	B7Z5R1;P31749	0.61185	P63165;B8ZZN6;B8ZZJ0;B8ZZ67;A8MUS8;B9A032	0.91189
D3YTB1;P62910;F8W727;D3YTI8	1.0894	O60229-3;C9IZQ6;O60229-2;H7BXZ5;O60229;J3QSW6	0.9888	B7ZKM0;Q15020;F8VV04;Q15020-2;Q15020-3;F8W667;H0YHU8	1.0301	P09493-5;F5H7S3;H7BYY1;H0YK48;B7Z596;H0YL80;H0YKX5;H0YNC7;P09493-2;H0YL52;P09493-7;P09493-6;P09493-4;P09493-3;P09493;D9YZV8;D9YZV3;D9YZV2;Q6ZN40;H0YN06;H0YK20;H0YL42	1.8575	B7Z632;O43929-2;O43929-3;O43929	NaN	B8ZZQ6;P06454-2;P06454;B8ZZA1;B8ZZW7;H7C2N1	0.94448
D6R9L5;P35659;D6RDA2;P35659-2;B4DFG0	0.89932	C9J0J7;P35080-2;G5E9Q6;C9J712;C9JQ45;P35080	0.97349	O95487-2;O95487;B7ZKM8	NaN	B7Z5R1;P31749	0.95301	H0YAW3;B7Z6B8;Q16698	0.69092	J3KT51;B8ZZT7;Q9UK76;Q9UK76-2;J3KSH8;Q9UK76-3;F5GY98	0.8911
Q9UHY7-2;D6RA00;Q9UHY7	1.3224	O43324-2;D6RBD7;C9J1V9;O43324;D6RCQ0;H0YAL7	0.88302	Q86UV5-4;Q86UV5-7;Q86UV5-3;Q86UV5-2;Q86UV5;B7ZKS7	0.92998	P62070-2;E9PK85;P62070-3;P62070;B7Z5Z2	0.92386	B7Z6I5;Q5QNY5;P40855-5;P40855;H0YJ60;H0YDY4;G3V3G9	0.98492	B8ZZU8;Q15370;I3L0M9;Q15370-2	0.95697
D6RAA6;P57088	0.98525	C9J2P0;K4DI90;P51965	1.0779	O94979-7;H7BXG7;O94979-6;O94979-3;B7ZL00;O94979-4;O94979-9;O94979-2;O94979;O94979-8;D6REX3;D6RHZ5;H0YAB3;H0Y9K1;O94979-5;H0Y8V7;H0Y8W8;H0YAF5	0.90153	B7Z632;O43929-2;O43929-3;O43929	1.2207	B7Z6L5;Q9UGI8-2;Q9UGI8	1.101	B8ZZZ0;Q6NVY1-2;Q6NVY1;H7C400;H7BYI7	0.86681
E9PGB1;E7ESU7;D6RAX2;E7EPF8;Q13363-2;Q13363	1.1375	C9J4M6;C9J2Y9;P30876	0.95892	Q53GS9-2;B8ZZD1;B9A018;Q53GS9;G5E9H0	0.958	H0YAW3;B7Z6B8;Q16698	0.71669	B7Z6P0;H3BQR2;Q9Y5Y2	0.99497	B9A067;Q16891-3;Q16891-2;Q16891;H7C463;C9J406;D6RAW4	0.98531
D6RD63;Q9BT78-2;Q9BT78;D6RAX7;D6RFN0	1.1708	C9J3F6;Q92609;Q92609-2	0.85382	B8ZZF8;Q9Y4Y9	0.89454	B7Z6I5;Q5QNY5;P40855-5;P40855;H0YJ60;H0YDY4;G3V3G9	1.1036	G5EA28;E9PKW9;P11117-2;E9PQW9;B7Z6U3;E9PP23;E9PHY0;P11117	NaN	B9ZVN9;O95602	0.14976
J3QSY4;D6RC52;D6RCB9;Q9NX24	NaN	C9JUA8;C9JBJ6;C9J413;C9JLU1;P52434	0.87107	P63165;B8ZZN6;B8ZZ67;A8MUS8;B8ZZJ0;B9A032	0.95345	B7Z6L5;Q9UGI8-2;Q9UGI8	1.1649	F8W1R7;P60660-2;P60660;J3KND3;G8JLA2;G3V1V0;B7Z6Z4;F8VPF3;F8VZV5;G3V1Y7;F8VZU9;F8W180;F8W1I5;P14649;F8VXL3;H0YI43	0.97367	E7ERW8;O60610-2;B9ZVX0;E9PHQ0;O60610-3;E7ET75;E9PEZ3;O60610;H9KV28;E7EMV0;E5RJ79;B4E2I7	1.0292
D6RDG3;P20290-2;H0Y9Y1;P20290	1.0445	C9J453;O15344-2;O15344;C9JZJ7	0.97041	H7C3S9;Q99627-2;E9PGT6;B8ZZP3;Q99627	1.3459	B7Z6P0;H3BQR2;Q9Y5Y2	0.86958	B7Z7A3;Q9BZE4;B4DY13;Q5T3R7	1.0307	H3BQI4;I3L2Z5;C6G496;P56270;P56270-2;I3L411;H3BPU3;I3L4Y2;I3L0M3;H3BQS2;H3BQD6;I3L0V8	0.8692
D6RDJ3;H0Y723;E7EQB9;O15160-2;O15160	NaN	C9J4Z3;P61513;M0R0A1;Q6P4E4;E9PEL3;M0R2L6;G5E9R3;A6NKH3	1.0808	B8ZZQ6;P06454-2;P06454;B8ZZA1;B8ZZW7;H7C2N1	0.98536	B7Z7A3;Q9BZE4;B4DY13;Q5T3R7	1.1014	B7Z7F3;Q9H6Z4-3;Q9H6Z4-2;Q9H6Z4;K7ENJ2;K7EID7;K7ENB9;K7EPW1;K7EIJ4;K7EJV3;F5H4C2	0.9671	C9IY40;Q5T653	0.7382
D6RDY6;O76094-2;O76094	1.7323	P55327-2;P55327-4;P55327;D0UFD3;C9J502;D0UFD1;P55327-3;F5H0B0;E5RK35;E5RFR7;H0YC44;D0UFD5	1.8691	J3KT51;B8ZZT7;Q9UK76;Q9UK76-2;J3KSH8;Q9UK76-3;F5GY98	0.9107	B7Z7F3;Q9H6Z4-3;Q9H6Z4-2;Q9H6Z4;F5H4C2;K7EIJ4;K7EJV3;K7ENJ2;K7EID7;K7ENB9;K7EPW1;K7EN31	0.91148	B7Z7Q6;P42785;P42785-2	1.1528	Q15008;C9IZE4;E9PHI9;Q6UV22;C9J7B7;H7C531;C9J0E9	0.93259
D6RGI3;Q9NVA2;D6RER5;D6RDP1;D6R9Y6;Q14141-3;D6RDU5;Q14141-2;Q14141-4;B1AMS2;Q14141;Q9NVA2-2;F5H1J5	0.47059	Q7Z2W4-3;Q7Z2W4-2;Q7Z2W4;C9J6P4	1.0698	B8ZZU8;Q15370;I3L0M9;Q15370-2	0.84719	P48739;P48739-2;B7Z7Q0;B3KYB6;B3KYB7	0.84941	B7Z7Z8;Q13451	1.1942	C9IZG4;O60888-3;O60888;O60888-2;C9IZQ5	0.87403
D6RFM5;E9PBJ5;P31040;H0Y8X1	1.0314	C9J813;Q05682-5;E9PGZ1;Q05682-4;F5H1Z9;E7EX44;Q05682-3;Q05682-6;Q05682-2;Q05682	1.1649	B9A067;Q16891-2;Q16891;C9J406;Q16891-3;H7C463;D6RAW4	1.0121	B7Z7Q6;P42785;P42785-2;E9PLY4;E9PNF7;E9PQB5;E9PL85;E9PNJ1;E9PQN3;E9PKN6;E9PIG4	0.75816	B7Z800;P55263-2;P55263;P55263-3	1.0925	P43307-2;F5H5Y2;C9J3L8;C9J5W0;P43307;E9PAL7;C9IZQ1	1.0071
D6RJA6;Q7L014	1.0725	C9J8H1;P36543-2;P36543	0.36914	F8VZV1;F8W1Z6;Q7Z3U7-2;F8VWA6;B9EGP5;Q7Z3U7-4;Q7Z3U7	0.78496	B7Z7Z8;Q13451	NaN	B7Z806;P13807-2;P13807;F5H1N8;F5H3S3;M0QYU1	1.019	C9J000;O75521-2;O75521	0.86886
E1P5S2;Q14498-3;Q14498-2;Q14498;H0Y4X3;G3XAC6;Q5QP22;Q5QP21;Q5QP23	0.98897	C9J8H9;C9JJT5;F8W7V3;P56134-2;F5H4H2;P56134;C9JU26;G3V325	0.94246	B9ZVT1;Q8IXT5;E5RHG1;E5RJ83;E5RJV8;E5RJW8	0.9098	B7Z800;P55263-2;P55263	0.83691	H3BND8;F5H8E5;B7Z815;Q93009;F5H2X1	1.041	C9J0J7;P35080-2;G5E9Q6	0.87571
E2QRG8;Q00765	1.7154	C9JTT7;C9J8M3;C9JZI1;P35249;C9JXZ7;C9JGY5;F8WE44	1.4826	O60610-2;B9ZVX0;E9PHQ0;O60610-3;E7ET75;E9PEZ3;O60610;H9KV28;E7ERW8;E7EMV0;B4E2I7;E5RJ79	0.79168	B7Z806;P13807-2;P13807;F5H3S3;F5H1N8;M0QYU1	NaN	F5GXQ0;B7Z9G5;Q5VW32;Q5VW33	NaN	O43324-2;D6RBD7;C9J1V9;O43324;H0YAL7;D6RCQ0	0.94595
E2QRI1;Q32P28-2;Q32P28;Q32P28-3	1.0837	C9J8Q5;P51649;P51649-2;F5H328	0.8575	Q15008;C9IZE4;E9PHI9;Q6UV22;C9J7B7;H7C531;C9J0E9	0.95717	H3BND8;F5H8E5;B7Z815;Q93009;F5H2X1	1.0895	B7Z9I1;P11310;P11310-2;Q5T4U5;B4DJE7;H0YDT5;E9PJM9	0.88078	C9J4M6;C9J2Y9;P30876	0.96493
H0YBG2;E5RFX7;E5RG77;H0YBB9;O94903	1.0508	Q14061;C9J8T6;H7C4E5	0.80828	C9IZG4;O60888-3;O60888;O60888-2;C9IZQ5	0.80423	F5GXQ0;B7Z9G5;Q5VW32	0.92369	Q13409-6;Q13409-3;B7ZA04;Q13409-2;Q13409-5;Q13409;F8W8S0;E7EQL5;E9PGG1;E7EUM4;E7ERR6;E7ERH4;E7ET01;E7ETL8;E7EQU2;E7ESD3;E7EMU4;E7EV09;E7EU01	0.8741	C9J363;Q9BUL8;H7C5M9;C9JSA3;C9JND6;C9J6F3;C9J5C3	0.99561
E5RGK8;E5RJT4;G5EA13;O60353	NaN	H0YGA2;D6RAW0;D6RA11;D6RFM0;Q9UQL0;P62837-2;D6RAH7;C9J9H9;H9KV45;Q9Y2X8;P62837;P61077;P51668;P61077-2;P61077-3	1.11	P43307-2;F5H5Y2;C9J3L8;C9J5W0;P43307;E9PAL7;C9IZQ1	0.8813	B7Z9I1;P11310;P11310-2;Q5T4U5;B4DJE7;H0YDT5;E9PJM9	1.1288	K7ES31;K7EMQ9;K7ERF1;B7ZAM9;Q9UBQ5;K7EQM4	0.98909	F8W038;Q8IXM2;C9J4G0;Q8IXM2-2;H0YIS7	NaN
E5RGN3;O00244;E5RIM7	0.93877	C9J9K3;P08865;A6NE09;C9JQR9	1.0023	C9J000;O75521-2;O75521	1.1555	Q13409-6;Q13409-3;B7ZA04;Q13409-2;Q13409-5;Q13409;F8W8S0;E7EQL5;E9PGG1;E7EUM4;E7ERR6;E7ERH4;E7ET01;E7ETL8;E7EQU2;E7ESD3;E7EMU4;E7EV09;E7EU01	0.8834	Q7Z3K3-5;E9PM80;Q7Z3K3-2;Q7Z3K3-3;B7ZBY5;Q7Z3K3;M0R2X2;H0YCT3;Q7Z3K3-4;F5H8H4	1.1121	C9J4Z3;P61513;M0R0A1;Q6P4E4;E9PEL3;M0R2L6;G5E9R3;A6NKH3	1.1392
E5RGS4;O60925	1.0096	Q16629-3;Q16629-2;Q16629-4;C9JAB2;Q16629;F8WEA1	1.058	O43324-2;D6RBD7;C9J1V9;O43324;H0YAL7;D6RCQ0	0.97426	K7ES31;K7EMQ9;K7ERF1;B7ZAM9;Q9UBQ5;K7EQM4	1.0329	Q9NR46;B7ZC38;Q9NR46-2;B7ZC39;F8WFB9	1.026	P55327-2;P55327-4;P55327;D0UFD3;C9J502;D0UFD1;P55327-3;F5H0B0;E5RFR7;H0YC44;D0UFD5;E5RK35	0.94642
E5RGX5;Q93045;Q93045-2	0.94386	C9JNK6;C9JAZ1;Q8IZ68;O75431	0.73427	C9J4M6;C9J2Y9;P30876	1.0145	Q7Z3K3-5;E9PM80;Q7Z3K3-2;Q7Z3K3-3;B7ZBY5;Q7Z3K3;H0YCT3;F5H8H4	0.98603	B7ZKM0;Q15020;F8VV04;Q15020-2;Q15020-3;H0YHU8;F8W667	1.0739	C9JT64;C9J679;C9JN15;Q13427-2;E9PG73;Q13427	0.77658
E5RHG8;Q15369-2;Q15369;E5RJ89	1.0234	C9JB50;G5E9L2;H0YLP6;H0YMF4;P46779;P46779-2;P46779-3;H0YKD8	1.1025	C9J3F6;Q92609;Q92609-2	1.1592	Q9NR46;B7ZC38;Q9NR46-2;B7ZC39;F8WFB9	1.0213	O95487-2;O95487;B7ZKM8	0.76587	Q7Z2W4-2;Q7Z2W4;C9J6P4;Q7Z2W4-5;H7C5K1;Q7Z2W4-4;Q7Z2W4-3	1.2144
G3V117;E5RHX8;Q9NPA8	0.83913	C9JBI3;P78330	0.82188	C9J469;C9J931;Q15382	1.035	B7ZKM0;Q15020;F8VV04;Q15020-2;Q15020-3;F8W667;H0YHU8	1.1733	O94979-7;H7BXG7;O94979-6;O94979-3;B7ZL00;O94979-4;O94979-9;O94979-2;O94979;O94979-8;D6REX3;D6RHZ5;H0YAB3;H0Y9K1;H0Y8V7;O94979-5;H0Y8W8;H0YAF5	1.0284	Q8N1B9;C9J6X0;O95299;E7ESZ7;Q8WXC9	1.017
E5RI99;P62888;E5RJH3	1.0129	C9JD32;J3KT29;P62829;B9ZVP7;J3QQT9;J3KTJ3	0.8377	F8W038;Q8IXM2;C9J4G0;Q8IXM2-2;H0YIS7	1.0884	O95487-2;O95487;B7ZKM8	1.1272	F5H2E2;F5GWM7;Q7Z460-2;E7EUA5;B7ZLX3;F5GWS0;Q7Z460-3;F8WA11;Q7Z460;H7C5M8;H0Y5T1;F5H3X0	0.94913	C9J719;C9JJ78;Q15125	1.5407
E5RIW3;O75347;E5RJD8;B4DT30;E5RIX8;E5RHG6	0.96502	C9JD53;C9JKM8;Q13907;Q13907-2	1.4877	C9J4Z3;P61513;M0R0A1;Q6P4E4;E9PEL3;M0R2L6;G5E9R3;A6NKH3	1.0803	O94979-7;H7BXG7;O94979-6;O94979-3;B7ZL00;O94979-4;O94979-9;O94979-2;O94979;O94979-8;D6REX3;D6RHZ5;H0YAB3;H0Y9K1;O94979-5;H0Y8V7;H0Y8W8;H0YAF5	0.8993	Q53GS9-2;B8ZZD1;B9A018;Q53GS9;G5E9H0	0.90848	C9J813;Q05682-5;E9PGZ1;Q05682-4;F5H1Z9;E7EX44;Q05682-3;Q05682-6;Q05682-2;Q05682	0.68474
H7C5V5;H0YF01;H0YBZ4;E7EP84;E5RJS5;Q15390	NaN	C9JDR0;Q15738	1.0362	C9JJV6;C9JZL8;C9J5M0;C9JC07;Q96S97	0.83913	F5H2E2;F5GWM7;Q7Z460-2;E7EUA5;B7ZLX3;F5GWS0;Q7Z460-3;F8WA11;Q7Z460	0.99861	B8ZZF8;Q9Y4Y9	0.94687	Q9NX33;C9JX57;F5GXV2;D3DSE6;C9J818;P57076;F8VZ95	0.79173
E7EMD0;F5H468;E7EVY7;P16435;H0Y4R2	0.87743	C9JE21;Q9NW13;C9JAA9;Q9NW13-2	0.78731	Q7Z2W4-3;Q7Z2W4-2;Q7Z2W4;C9J6P4	0.79718	Q9ULU4-2;Q9ULU4-4;Q9ULU4-3;Q9ULU4-6;B7ZM62;H7C4X9;H7C0U2;Q9ULU4-8;Q2HXV1;Q9ULU4-14;Q2HXV3;Q9ULU4-12;Q9ULU4-9;Q9ULU4-5;Q9ULU4;J3KPU3;Q9ULU4-13;Q9ULU4-10;Q9ULU4-11;Q9ULU4-7;F5H0X3	0.98932	P63165;B8ZZN6;B8ZZJ0;B8ZZ67;A8MUS8;B9A032	0.98131	H7C3Z6;E7EX83;C9J840;H7C0P6;O95819;O95819-3;G5E948;E7ENQ1;O95819-4;G3XAA2;H7C360;O95819-2;O95819-5;E7EN19;E7ESS2	0.50629
O14617-3;E7EMM2;O14617-4;O14617-2;G5E988;O14617;O14617-5	NaN	C9JES6;Q14012	0.96682	C9J712;P35080	1.3484	H7C173;H7C202;Q6P582;Q6NZ67;B8ZZ87;H7BZ50	0.98028	B8ZZQ6;P06454-2;P06454;B8ZZA1;B8ZZW7;H7C2N1	0.94794	C9J8H9;C9JJT5;F8W7V3;P56134-2;F5H4H2;P56134;C9JU26;G3V325	1.0116
E7EUI7;E7EMN6;Q6NXS1;P41236	0.73215	C9JFE4;Q13098-5;Q13098;Q13098-7;Q13098-6;J3QQX0	0.93237	C9J719;C9JJ78;Q15125	0.98522	B8ZZF8;Q9Y4Y9	0.88597	J3KT51;B8ZZT7;Q9UK76;Q9UK76-2;J3KSH8;Q9UK76-3;F5GY98	0.94422	C9JTT7;C9J8M3;C9JZI1;P35249;C9JXZ7;C9JGY5;F8WE44	0.89716
E7EN38;Q92878;Q92878-2;E9PM98;E7ESD9;Q92878-3	0.95736	C9JFR7;P99999;CON__P62894	0.98861	E9PFH4;Q9Y5L0-3;Q9Y5L0;Q9Y5L0-1;C9J7E5	1.0109	P63165;B8ZZN6;B8ZZ67;A8MUS8;B8ZZJ0;B9A032	0.9523	B8ZZU8;Q15370;I3L0M9;Q15370-2	0.97522	C9J8Q5;P51649;P51649-2;F5H328	0.9968
E7EU94;E7ESX0;Q8WWY3-3;E7EN72;Q8WWY3-2;E7ESA8;E7EVX8;Q8WWY3	0.99422	I3L4I3;I3L1P4;I3L4M7;I3L445;F8WDZ1;Q8IZL8;I3L3A8;C9JFV4;Q8IZL8-2	1.0864	C9J813;Q05682-5;E9PGZ1;Q05682-4;F5H1Z9;E7EX44;Q05682-3;Q05682-6;Q05682-2;Q05682	1.0599	H7C3S9;Q99627-2;E9PGT6;B8ZZP3;Q99627	0.69067	C9J2I0;P52594-2;B8ZZY2;P52594-3;P52594;P52594-4	1.1072	Q14061;C9J8T6;H7C4E5	0.73103
P19367-4;P19367-2;P19367;P19367-3;E7ENR4;B1AR62;B1AR61;B1AR63;Q2TB90-3;Q2TB90-2;E9PB90;Q2TB90;P52789;P52790	0.95386	F5H304;C9JH72;F5H0U6;P40937-2;P40937	1.1029	H7C3Z6;E7EX83;C9J840;H7C0P6;E7ENQ1;O95819-4;G3XAA2;H7C360;O95819-2;O95819;O95819-5;E7EN19;E7ESS2;O95819-3;G5E948	0.89072	B8ZZQ6;P06454-2;P06454;B8ZZA1;B8ZZW7;H7C2N1	0.97174	B8ZZZ0;Q6NVY1-2;Q6NVY1;H7BYI7	1.0069	C9J9K3;P08865;A6NE09;C9JQR9	1.0584
P55265-5;P55265;P55265-4;E7ENU4;P55265-3;H0YCK3;P55265-2	0.77919	P13798;C9JIF9;H7C393;F8WEH5;C9JLK2;H7C1U0	0.87575	C9J8H9;C9JJT5;F8W7V3;P56134-2;F5H4H2;P56134;C9JU26;G3V325	0.99532	J3KT51;B8ZZT7;Q9UK76;Q9UK76-2;J3KSH8;Q9UK76-3;F5GY98	0.94883	F8WF17;B9A055;Q3ZCW2	NaN	Q16629-3;Q16629-2;Q16629-4;C9JAB2;Q16629;F8WEA1	0.98913
E7EPB3;P50914	0.86638	C9JIG9;O95747	0.92424	C9JTT7;C9J8M3;C9JZI1;P35249;C9JXZ7;C9JGY5;F8WE44	1.1063	B8ZZU8;Q15370;I3L0M9;Q15370-2	0.95706	B9A067;Q16891-2;Q16891;C9J406;Q16891-3;H7C463;D6RAW4	1.0077	C9JAF7;O95721	0.99045
Q16181-2;E7ES33;E7EPK1;Q16181;B4DNE4;G3V1Q4;H0Y3Y4;H0YFF6;Q5JXL7;F5GZE5;Q6ZU15	1.0412	F2Z2Y6;C9JIZ0;C9JNV3;O95777	3.2727	C9J8Q5;P51649;P51649-2;F5H328	0.9361	C9J406;B9A067;Q16891-2;Q16891;H7C463;Q16891-3	1.0053	F8VZV1;F8W1Z6;Q7Z3U7-2;F8VWA6;B9EGP5;Q7Z3U7-4;Q7Z3U7;F8VZV6;F8VQS2	1.1989	C9JNK6;C9JAZ1;Q8IZ68;O75431	1.0144
E7EQ69;Q9GZZ1	0.43808	P82930;C9JJ19;H3BP88	0.91554	Q14061;C9J8T6;H7C4E5	0.88765	F8VZV1;F8W1Z6;Q7Z3U7-2;F8VWA6;B9EGP5;Q7Z3U7-4;Q7Z3U7;F8VZV6;F8VQS2	1.0367	B9ZVN9;O95602	1.0229	C9JBI3;P78330	0.9966
F5GX39;E7EQ72;Q15363	NaN	C9JUE0;C9JJP5;G5E9V1;Q92734;C9JTY3	1.9843	C9J9K3;P08865;A6NE09;C9JQR9	1.0107	B9ZVN9;O95602	0.71695	B9ZVT1;Q8IXT5;E5RJW8;E5RHG1;E5RJ83;E5RJV8	0.88375	C9JBJ6;C9JLU1;P52434;C9JUA8;C9J413;C9JCU7	1.0632
H7C1R3;H0Y5Q7;G5E9Q7;E7EQB8;E9PDD5;P51553	0.73737	F8WB86;Q6PJ80;C9JLR4;Q92575	0.84098	Q96D46;C9JA08	1.258	B9ZVT1;Q8IXT5;E5RJW8;E5RHG1;E5RJ83;E5RJV8	0.79589	C9IY40;Q5T653	NaN	C9JC63;Q15070-3;E7EVY0;Q15070-2;Q15070;J3KNA0	1.1404
E7EQR4;P15311	0.96394	C9JXB8;C9JNW5;P83731	0.99368	Q16629-3;Q16629-2;Q16629-4;C9JAB2;Q16629;F8WEA1	1.0942	E7ERW8;O60610-2;B9ZVX0;E9PHQ0;O60610-3;E7ET75;E9PEZ3;O60610;H9KV28;E7EMV0;E5RJ79;B4E2I7	0.94153	Q15008;C9IZE4;E9PHI9;Q6UV22;C9J7B7;C9J0E9;H7C531	0.94757	C9JDR0;Q15738	1.0722
G3V3B0;Q9UKV3-3;Q9UKV3-2;E7EQT4;Q9UKV3-5;Q9UKV3;G3V3T3	0.85152	C9JWG0;C9JVG3;C9JQU9;C9JNZ1;Q16851-2;Q16851;E7EUC7;F2Z3H1;C9JTZ5;C9JUW1	0.92193	C9JAW5;Q9Y241;C9JNU6	0.92966	C9IY40;Q5T653	NaN	P43307-2;F5H5Y2;C9J3L8;C9J5W0;P43307;E9PAL7;C9IZQ1	0.9956	C9JE21;Q9NW13;C9JAA9;Q9NW13-2	0.87774
E7ES08;E7EQU1;O15347;E9PES6	0.97207	Q9H254-2;C9JRP8;M0QZQ3;Q9H254-4;Q9H254;M0R1V6	1.4673	C9JBI3;P78330	2.0673	Q15008;C9IZE4;E9PHI9;Q6UV22;C9J7B7;C9J0E9;H7C531	0.97081	C9J0J7;P35080-2;G5E9Q6;C9JQ45	0.89147	C9JES6;Q14012	0.89562
E7ER35;E9PC03;P43356	NaN	Q9NX63;C9JRZ6;F8WAR4;G3V1K1	0.94874	C9JBJ6;C9JLU1;P52434;C9JCU7;C9JUA8;C9J413	0.983	C9IZG4;O60888-3;O60888;O60888-2;C9IZQ5	0.97939	O43324-2;D6RBD7;C9J1V9;O43324;H0YAL7;D6RCQ0	0.82765	C9JFE4;Q13098-5;Q13098;Q13098-7;Q13098-6;J3QQX0	0.99191
E9PDE8;O95757;E7ES43;D6RJ96	0.96979	C9JVB6;Q7L0Y3	0.99665	E9PNC7;Q14919;Q14919-2;C9JCC6;E9PQX9	1.1447	P43307-2;F5H5Y2;C9J3L8;C9J5W0;P43307;E9PAL7;C9IZQ1	1.099	C9J2G0;F8W733;Q9NXR7-4;Q9NXR7-3;Q9NXR7;Q9NXR7-1	1.2206	C9JFR7;P99999;CON__P62894	0.85826
E7ESU4;Q9H0A0	1.0067	C9JVN1	0.57552	C9JDR0;Q15738	1.0543	C9JRU6;C9J0B2;C9JUW4;C9J8R4;C9JVE2;Q96GG9	1.0426	C9J2P0;K4DI90;P51965	0.95846	I3L4I3;I3L1P4;I3L4M7;I3L445;F8WDZ1;Q8IZL8;I3L3A8;C9JFV4;Q8IZL8-2	0.95663
G5E9S2;E7ET17;E7EWE5;P51659-3;P51659;P51659-2;E7EPL9;E7ER27	1.0592	O60716-32;O60716-31;O60716-29;O60716-27;O60716-30;O60716-28;O60716-26;O60716-25;O60716-24;O60716-23;O60716-21;O60716-19;O60716-22;O60716-20;O60716-16;O60716-18;O60716-15;O60716-17;O60716-13;O60716-11;O60716-14;O60716-12;O60716-10;O60716-8;O60716-9;O60716-7;O60716-5;C9JZR2;O60716-3;O60716-6;O60716-4;O60716-2;O60716;E9PKY0	1.5772	C9JG97;Q13685;C9JEH3;H7C0R2;C9JTS3	1.3373	C9J0J7;P35080-2;G5E9Q6	0.98579	C9J2Y9;P30876;C9J4M6;C9JMN3;C9JZW8	1.1083	P13798;C9JIF9;F8WEH5;H7C393	0.65565
P62847-2;E7ETK0;P62847-3;P62847;P62847-4	1.0817	C9K025;P18077;F8WBS5;F8WB72	0.99368	C9JES6;Q14012	0.91216	O43324-2;D6RBD7;C9J1V9;O43324;H0YAL7;D6RCQ0	1.0065	C9J3F6;Q92609;Q92609-2	1.0845	C9JIG9;O95747	0.94106
P60953;E7ETU3;Q5JYX0;P60953-1	0.95736	P78344-2;H0Y3P2;P78344;D3DQV9;E9PKF8;H0YE22;H0YEC5;H0YD77;H0YCH5	1.0155	C9JFE4;Q13098-5;Q13098;Q13098-7;Q13098-6;J3QQX0	1.0094	C9J2G0;F8W733;Q9NXR7-4;Q9NXR7-3;Q9NXR7;Q9NXR7-1	0.97928	C9J453;O15344-2;O15344;C9JZJ7	1.0383	C9JIM8;P11166	1.2276
Q13428-5;Q13428-2;Q13428-8;J3KQ96;Q13428-6;Q13428-7;Q13428;E7ETY2;Q13428-3;Q13428-4;E9PHK9	0.35373	D3YTB1;P62910;F8W727;D3YTI8	1.1329	C9JFR7;P99999;CON__P62894	0.91021	C9J2P0;K4DI90;P51965	1.0008	C9J469;C9J931;Q15382	0.97157	F2Z2Y6;C9JIZ0;C9JNV3;O95777	1.0015
P50395;E7EU23;P50395-2;Q5SX87;Q5SX91;Q5SX86;Q5SX90	0.94448	Q8IY33-4;Q8IY33-2;Q8IY33-5;D3YTD2;Q8IY33	0.37566	Q8IZL8;C9JFV4;Q8IZL8-2;F8WDZ1;I3L3A8;I3L4M7;I3L445;I3L4I3;I3L1P4;E7EV54;I3L4P1	1.0259	C9J4M6;C9J2Y9;P30876	0.99542	Q8IXM2-2;F8W038;Q8IXM2;C9J4G0	1.1423	P82930;C9JJ19;H3BP88	1.0394
E7EU96;Q8NEV1;P68400;P68400-2	0.86636	D3YTE0;Q8N9T8-2;Q8N9T8;H0YFD2	0.71872	P13798;C9JIF9;H7C393;F8WEH5;C9JLK2;H7C1U0	0.94202	C9JBD3;C9J3C1;C9JKZ2;H7BZI1;Q02818	1.5885	C9J4Z3;P61513;M0R0A1;Q6P4E4;E9PEL3;M0R2L6;G5E9R3;A6NKH3	1.0955	P22694-10;P22694-4;P22694-3;P17612-2;P22694;P22612;P17612;P22694-5;P22694-7;P22694-6;C9JK39;P22694-9;P22694-2;Q15136;B1APG2;B1APF8;B1APF9;K7ERP6;P22694-8;B1APG3	0.94099
P28288-2;F5GYC1;P28288;E7EUE1	1.2597	D6PSQ9;P49903;Q5T5U6;Q5T5U9;B4DWK0	NaN	C9JIG9;O95747	1.0034	C9J3F6;Q92609;Q92609-2	0.95163	F8WF03;F2Z2I0;F2Z2W5;C9J647;Q9NXE4-2;Q9NXE4;Q9NXE4-4	1.0055	C9JLF4;Q9NVH0-2;Q9NVH0	0.77818
E7EUT8;Q12874	1.0955	H0Y9L5;D6R905;Q06265-3;Q06265-4;D6RIY6;Q06265;Q06265-2	0.92438	F2Z2Y6;C9JIZ0;C9JNV3;O95777	0.9156	C9J3N8;P04792	0.86665	C9J712;P35080	1.1807	F8WB86;Q6PJ80;C9JLR4;Q92575	1.1219
E7EUY0;P78527-2;P78527;H0YG84	1.0308	D6R9J0;Q8NBM8	NaN	P82930;C9JJ19;H3BP88	1.1236	C9J453;O15344-2;O15344;C9JZJ7	0.86043	Q9Y2I1-4;Q9Y2I1-3;C9J715;Q9Y2I1	0.77048	O95104-2;C9JLZ0;O95104	0.55625
G5E9S8;Q07866-8;G3V2E7;Q07866-2;Q07866-3;Q07866;F8W6L3;Q07866-7;G3V3H3;Q07866-5;Q07866-10;Q07866-6;G3V5R9;Q07866-4;Q07866-9;E7EVH7	0.96481	D6RBF6;D6RFG2;D6R9U8;D6RIR6;Q9BUT1-2;Q9BUT1	0.88341	C9JJP5;G5E9V1;Q92734;C9JUE0;C9JTY3	1.4896	C9J469;C9J931;Q15382	1.0159	Q9NX33;C9JX57;F5GXV2;D3DSE6;C9J818;P57076;F8VZ95	NaN	C9JNV2;P41223;C9JCD9	0.82355
O43674-2;E7EWP0;O43674;H0Y886	0.67811	Q9UHY7-2;D6RA00;Q9UHY7	1.1114	O60336-4;F8WC21;O60336-3;C9JL14;O60336-6;O60336;O60336-2	0.97869	F8W038;Q8IXM2;C9J4G0;H0YIS7;Q8IXM2-2;F8W1H0	1.1299	E7EX83;C9J840;H7C0P6;E7ENQ1;O95819-4;G3XAA2;H7C360;O95819-2;O95819;O95819-5;E7EN19;E7ESS2;O95819-3;G5E948;H7C3Z6;Q9UKE5-8;Q8N4C8-5;Q9UKE5-5;Q8N4C8-2;Q9UKE5-7;Q8N4C8-3;Q9UKE5-3;Q8N4C8-4;F5H5M9;Q9UKE5-6;Q9UKE5-2;Q8N4C8;F5H865;Q9UKE5-4;Q9UKE5	0.75516	C9JXB8;C9JNW5;P83731	0.9809
P68036-2;P68036;E7EWS7	0.71091	D6RA57;Q96EY4;H0Y9X1	0.96362	F8WB86;Q6PJ80;C9JLR4;Q92575	0.80147	C9J4I3;P51692	1.2827	C9JTT7;C9J8M3;C9JZI1;P35249;C9JXZ7;C9JGY5;F8WE44	0.92625	G5E9W8;P46976-3;C9JQ42;D3DNH0;P46976-2;P46976;C9J8R8;C9J7C7	0.78452
E9PH64;E7EWZ0;Q9Y6M9;E9PF49	0.86478	D6RAN4;P32969;H0Y9V9;E7ESE0;H0Y9R4	1.1354	C9JNV2;P41223;C9JCD9	0.97148	C9J4Z3;P61513;M0R0A1;Q6P4E4;E9PEL3;M0R2L6;G5E9R3;A6NKH3	1.0767	C9J8Q5;P51649;P51649-2;F5H328	1.0808	O60828-6;C9JQA1;O60828-3;O60828-2;O60828;O60828-10;O60828-9;O60828-8;O60828-7;O60828-5;O60828-4	0.84142
P23588;E7EX17;F8VX11;B4DS13;F8W0K0;F8VRU1;F8VYE9;F8VSC7;F8VP89	1.0948	E9PGB1;E7ESU7;D6RAX2;E7EPF8;Q13363-2;Q13363	0.80382	C9JXB8;C9JNW5;P83731	0.95123	C9JJV6;C9JZL8;C9J5M0;C9JC07;Q96S97	NaN	Q14061;C9J8T6;H7C4E5	0.83226	C9JQD4;O43447;A6NM32;H0YEL5;A6NNE7	1.0876
E7EXA3;Q9GZT8-3;Q9GZT8-2;Q9GZT8	0.94633	Q9BT78;D6RAX7;D6RFN0;D6RD63;Q9BT78-2	0.97585	G5E9W8;P46976-3;C9JQ42;D3DNH0;P46976-2;P46976;C9J8R8;C9J7C7	1.0035	Q7Z2W4-2;Q7Z2W4;C9J6P4;Q7Z2W4-3;Q7Z2W4-5;H7C5K1;Q7Z2W4-4	0.91038	C9J9K3;P08865;A6NE09;C9JQR9	1.0354	Q9NX63;C9JRZ6;G3V1K1;F8WAR4	1.0068
Q8IY67;Q8IY67-2;E9PAU2	NaN	P06730;P06730-3;D6RBW1;P06730-2;H0Y8J7;D6RHE2;H0Y8X3;A6NMX2	0.94653	O60828-6;C9JQA1;O60828-3;O60828-2;O60828;O60828-7;O60828-4;O60828-10;O60828-9;O60828-8;H7C053;O60828-5	0.90119	Q9Y2I1-4;Q9Y2I1-3;C9J715;Q9Y2I1	1.5096	Q96D46;C9JA08;C9J0B9	1.334	Q5JRX3;Q5JRX3-2;C9JSL2;Q5JRX3-3;H0Y7L7;B1APQ0	1.4532
F8VZJ2;F8W0W4;H0YHX9;Q13765;Q13765-2;E9PAV3;F8W1N5;F8VNW4;F8VZ58;Q9BZK3	0.9882	D6RDJ3;E7EQB9;O15160-2;O15160;H0Y9C4;H0Y723	0.99958	C9JQD4;O43447;H0YEL5;A6NNE7	0.92673	C9J808;Q9BYG3;H7BZL0;C9J6C5	0.9598	Q16629-3;Q16629-2;Q16629-4;C9JAB2;Q16629;F8WEA1	0.98676	C9JTA6;Q12824-2;Q12824;G5E975	0.76022
O00139-2;O00139-1;E9PB70;O00139;O00139-4	0.78008	D6RE82;P56182	1.1492	Q9NX63;C9JRZ6;G3V1K1;F8WAR4	0.89029	Q9NX33;C9JX57;F5GXV2;D3DSE6;C9J818;P57076;F8VZ95	NaN	C9JAF7;O95721	0.89756	Q9H9P8-2;C9JVN9;Q9H9P8	0.45577
E9PBU3;P31939;F5GWY2;H7C1S2;H7C084;C9JLK0;H7BZU3;F8WEF0	0.93252	J3KNE5;P12081-2;D6REN6;P12081;B4E1C5;B4DDD8;B3KWE1;E7ETE2;C9JWK3;C9JV49;B4DDY8;P49590;D6RF05;D6RJE6;B4DQ67;C9JHI8;E9PG66	0.96088	Q5JRX3-3;Q5JRX3;Q5JRX3-2;C9JSL2;B1APQ0;H0Y7L7	0.97943	H7C3Z6;E7EX83;C9J840;H7C0P6;E7ENQ1;O95819-4;G3XAA2;H7C360;O95819-2;O95819;O95819-5;E7EN19;E7ESS2;O95819-3;G5E948	0.8833	C9JAW5;Q9Y241;C9JNU6	0.92193	C9JYN0;Q16563-2;Q16563	1.5485
E9PBY7;E9PQ61;O75152	1.1073	D6RGI3;Q9NVA2;D6RER5;D6RDU5;Q9NVA2-2;D6RDP1;D6R9Y6;Q14141-3;Q14141-2;Q14141-4;B1AMS2;Q14141;F5H1J5	0.76388	Q9H857-4;Q9H857-3;Q9H857-2;Q9H857;C9JTZ6;E9PAL9;H7C519	1.1375	C9J8H9;C9JJT5;F8W7V3;P56134-2;F5H4H2;P56134;C9JU26;G3V325	1.0092	C9JNK6;C9JAZ1;Q8IZ68;O75431	0.95078	O60716-24;O60716-23;O60716-21;O60716-19;O60716-22;O60716-20;O60716-16;O60716-18;O60716-15;O60716-17;O60716-13;O60716-11;O60716-14;O60716-12;O60716-10;O60716-8;O60716-9;O60716-7;O60716-5;C9JZR2;O60716-3;O60716-6;O60716-4;O60716-2;O60716;E9PRE2;O60716-32;O60716-31;O60716-29;O60716-27;O60716-30;O60716-28;O60716-26;O60716-25	1.5785
E9PG39;E9PC15;Q53H12	0.51284	O95394;D6RF12;E9PF86;D6RCD1;D6RC77;D6RCQ8;D6RF77;D6RIS6;J3KN95	0.99055	C9JVE2;Q96GG9;C9JRU6;C9J0B2;C9JUW4;C9J8R4	1.6285	C9JTT7;C9J8M3;C9JZI1;P35249;C9JXZ7;C9JGY5;F8WE44	0.93254	C9JBI3;P78330	0.96442	C9K058;Q9H2H8;H7BZ14	1.0124
E9PC52;Q16576;Q16576-2;Q5JP01;Q5JP02;C9J959;C9J7L0;Q5JNZ6	0.94798	D6RFH4;H3BUX2;O43169;J3KNF8	1.0437	O15530-2;E9PER6;O15530-3;C9JWR9;O15530;Q6A1A2;O15530-4;O15530-5	1.0336	C9J8Q5;P51649;P51649-2;F5H328	0.90789	C9JBJ6;C9JLU1;P52434;C9JUA8;C9J413;C9JCU7	1.1846	C9K0C3;Q6UWP7-2;Q6UWP7-3;Q6UWP7	0.87506
E9PCI9;P14324	0.85908	D6RFM5;P31040;E9PBJ5;H0Y8X1	1.0689	C9JX83;O00566	NaN	Q14061;C9J8T6;H7C4E5	0.90077	C9JC63;Q15070-3;E7EVY0;Q15070-2;Q15070;J3KNA0	NaN	P78344-2;H0Y3P2;P78344;D3DQV9;E9PKF8;H0YE22;H0YEC5;H0YD77;H0YCH5	1.0549
E9PCY4;P61962;B4E039	0.97593	D6RFW1;Q96EQ0	0.80405	O60716-24;O60716-23;O60716-21;O60716-19;O60716-22;O60716-20;O60716-16;O60716-18;O60716-15;O60716-17;O60716-13;O60716-11;O60716-14;O60716-12;O60716-10;O60716-8;O60716-9;O60716-7;O60716-5;C9JZR2;O60716-3;O60716-6;O60716-4;O60716-2;O60716;E9PRE2;O60716-32;O60716-31;O60716-29;O60716-27;O60716-30;O60716-28;O60716-26;O60716-25	1.0699	C9J9K3;P08865;A6NE09;C9JQR9	1.0333	E9PNC7;E9PQX9;Q14919;Q14919-2;C9JCC6	NaN	D3YTB1;P62910;F8W727;D3YTI8	1.1035
E9PD53;Q9NTJ3;Q9NTJ3-2;C9JVD8;C9J578;C9JR83	1.3185	P14406;D6RIE3;D6RGV5;H0UI06;D6R9C3	1.1245	D3YTB1;P62910;F8W727;D3YTI8	1.0945	Q96D46;C9JA08	1.2166	C9JDR0;Q15738	1.06	H0YFD2;D3YTE0;Q8N9T8-2;Q8N9T8	0.51337
F5H861;E9PL69;E9PD78;P23921	0.61189	E1P5S2;Q14498-3;Q14498-2;Q14498;H0Y4X3;G3XAC6;Q5QP22;Q5QP21;Q5QP23	1.0158	D3YTE0;Q8N9T8-2;Q8N9T8;H0YFD2	1.036	C9JWI7;E7EMT0;C9JA91;Q9Y6A5	NaN	C9JEB9;C9JM78;C9JQ90;Q02338	1.2524	D6PSQ9;P49903;Q5T5U6;Q5T5U9;B4DWK0	0.85775
Q96AE4;Q96AE4-2;E9PEB5;B4DT31;C9JSZ1	0.97714	E2QRG8;Q00765	1.1478	D6PSQ9;P49903;Q5T5U9;B4DWK0;Q5T5U6	1.468	Q16629-3;Q16629-2;Q16629-4;C9JAB2;Q16629;F8WEA1	1.0323	C9JG97;Q13685;C9JEH3;C9JTS3;H7C0R2	1.012	D6R9C3;P14406;D6RIE3;D6RGV5;H0UI06	0.89026
F5H7M3;H0YDD4;E9PEJ4;P10515	1.0105	E2QRI1;Q32P28-2;Q32P28;Q32P28-3	0.59971	D6R905;Q06265;Q06265-2;D6RAP4;H0Y9L5;D6RA17;Q06265-3;Q06265-4;D6RIY6	1.0409	C9JAW5;Q9Y241;C9JNU6	0.9627	C9JES6;Q14012	1.0061	D6R9J0;Q8NBM8	1.0618
P50570-3;P50570-2;K7ESI9;P50570;F5H4R9;E9PEQ4;E5RIK2;Q6P2G1;E5RHK8;Q05193-5;Q05193-3;Q05193-4;Q9UQ16-2;Q9UQ16-3;Q05193-2;Q05193;Q9UQ16;Q9UQ16-4	0.81227	E9PRZ9;E3W975;E9PM92;O00193	0.93304	D6RBF6;D6RFG2;D6R9U8;D6RIR6;Q9BUT1-2;Q9BUT1	1.0399	C9JNK6;C9JAZ1;Q8IZ68;O75431	1.0973	C9JFE4;Q13098-5;Q13098;Q13098-7;Q13098-6;J3QQX0	1.1595	D6R9P3;D6RD18;Q99729-3;D6RBZ0;Q99729-2;Q99729-4;Q99729	1.065
E9PF10;O75694-2;O75694	NaN	E9PBA6;E3W994;J3KR49;O75122;F5H604;E7ERI8;E7EW49;H0Y5T1;F5H3X0	0.89423	Q9UHY7-2;D6RA00;Q9UHY7	1.0165	C9JBI3;P78330	1.888	C9JFR7;P99999;CON__P62894	0.88148	Q9UHY7-2;D6RA00;Q9UHY7	1.0592
Q16836;E9PF18;J3KQ17;Q16836-2	1.0009	O60313;E5KLK1;E5KLJ6;E5KLJ9;O60313-2;E5KLJ5	1.2152	D6RAA6;P57088	0.90583	C9JBJ6;C9JLU1;P52434;C9JUA8;C9J413;C9JCU7	1.0345	I3L1P4;I3L4M7;I3L445;F8WDZ1;Q8IZL8;I3L3A8;C9JFV4;Q8IZL8-2;I3L4I3	1.0284	D6RAA6;P57088	0.7653
E9PFH8;P05455;E7ERC4;E9PGX9;E9PFL9	0.98147	E5RFP0;Q8WVJ2	2.2809	D6RAW0;D6RFM0;P62837-2;D6RAH7;H9KV45;P62837;P61077;P61077-2;P61077-3;H0YGA2;D6RA11;Q9UQL0;C9J9H9;Q9Y2X8;P51668	1.3006	C9JBL1;Q9Y6A9	NaN	P13798;C9JIF9;H7C393;F8WEH5;C9JLK2;H7C1U0	1.0533	D6RAW0;D6RFM0;P62837-2;D6RAH7;H9KV45;P62837;P61077;P61077-2;P61077-3;H0YGA2;D6RA11;Q9UQL0;C9J9H9;Q9Y2X8;P51668	0.97098
E9PH29;P30048	1.086	E5RFP6;E5RJN6;E5RHZ6;Q9Y277;Q9Y277-2;F5H740;E5RHE1;E5RK27;F8W7Y3;E5RFL1	1.0547	D6RFM7;D6RAP6;Q9UJX5-2;Q9UJX5;E9PCR4	0.36909	E9PNC7;E9PQX9;Q14919;Q14919-2;C9JCC6	0.99439	F8W7D0;C9JIM0;P30039	1.2082	D6RHU2;D6RAI5;Q13423;D6RCR6;E9PCX7	1.1457
E9PLF1;P28161-2;E9PHN6;P28161;F6XZQ7;E9PHN7;Q5T8Q9;P46439;Q5T8R1	0.93273	H0YBG2;E5RFX7;E5RG77;H0YBB9;O94903	1.0323	E9PGB1;E7ESU7;D6RAX2;E7EPF8;Q13363-2;Q13363	0.95306	H0Y4D4;H7C131;P09110-2;C9JDE9;P09110	0.89883	F2Z2Y6;C9JIZ0;C9JNV3;O95777	0.90782	D6RFM7;D6RAP6;Q9UJX5-2;Q9UJX5;E9PCR4	NaN
E9PI41	NaN	E5RIU2;F8VWB3;E5RGL6;E5RHC5;Q8N6T3-3;Q8N6T3;Q8N6T3-2	0.87203	Q9BT78;D6RAX7;D6RD63;Q9BT78-2;D6RFN0	1.0031	C9JTS3;C9JG97;Q13685;C9JEH3	1.7754	P82930;C9JJ19;H3BP88	1.22	E9PGB1;E7ESU7;D6RAX2;E7EPF8;Q13363-2;Q13363	0.94098
E9PK01;P29692;P29692-3;P29692-2;E9PRY8;E9PPR1;E9PL12;E9PQ49;E9PI39;E9PMW7;E9PL71;E9PQZ1;P29692-4;E9PN91;E9PIZ1;H0YCK7;E9PK06;E9PKK3;E9PK72;E9PNW6;E9PJD0;H0YE58;H0YE72;E9PQC9	0.98021	E5RGN3;O00244;E5RIM7	0.98021	P06730;P06730-3;D6RBW1;P06730-2;D6RHE2;H0Y8J7;H0Y8X3;A6NMX2	1.0839	C9JES6;Q14012	1.0146	C9JUE0;C9JJP5;G5E9V1;Q92734;C9JTY3	0.93178	D6RB01;Q9Y6X4	0.94908
E9PK09;E9PQN2;E9PKI6;Q9NYF8-3;E9PK91;Q9NYF8-2;Q9NYF8;E9PJA7;Q9NYF8-4;H0YF00	1.1361	E5RJ48;E5RJA0;E5RGR0;O75608-2;O75608	0.86061	J3QSY4;D6RC52;D6RCB9;Q9NX24	1.0184	E9PPU6;H0YC94;C9JEV6;Q9UJ70;H7C3G9;Q9UJ70-2	0.63932	F8WB86;Q6PJ80;C9JLR4;Q92575	0.95129	D6RBV2;Q12907;D6RBH1;D6RDX1;D6RIU4	1.0882
E9PK57	NaN	E5RGX5;Q93045;Q93045-2	1.0144	Q8N5K1;D6RCF4	0.78123	C9JF46;P48059-2	1.3574	I3L2L5;C9JLW8;I3L4Q0;I3L317	1.4398	P06730;P06730-3;D6RBW1;P06730-2;D6RHE2;H0Y8J7;H0Y8X3;A6NMX2	0.92412
E9PKG1;Q99873-3;Q99873-2;Q99873-4;Q99873;H7C2I1;E9PNR9;E9PQ98;E9PIX6;H0YDE4;E9PMW9;E9PI83;Q9NR22-2;Q9NR22	1.0083	E5RHG8;Q15369;Q15369-2;E5RJ89	1.0055	D6RCK3;Q9H8S9-2;H7BZ12;Q9H8S9;Q7L9L4;Q7L9L4-2	0.86704	C9JFE4;Q13098-5;Q13098;Q13098-7;Q13098-6;J3QQX0	1.0398	C9JNV2;P41223;C9JCD9	1.0146	D6RCD1;D6RC77;D6RCQ8;D6RF77;O95394;D6RF12;E9PF86	0.94272
H0YD18;E9PKG6;P80303-2;P80303	NaN	E5RHW4;O94905;E5RJ09	1.0192	D6RDJ3;E7EQB9;O15160-2;O15160;H0Y723	1.0982	C9JFR7;P99999;CON__P62894	0.85936	C9JXB8;C9JNW5;P83731	0.95648	D6RCP9;P27707;D6RFG8	NaN
E9PN51;F8W9K7;E9PKH6;E9PPW7;O00217	1.0405	E5RI56;E5RGM3	0.78177	D6RGE2;D6RE73;E7ENF9;Q96CN7	0.84923	Q8IZL8;C9JFV4;Q8IZL8-2;I3L4M7;F8WDZ1;I3L3A8;I3L4I3;I3L1P4;I3L445;E7EV54	0.97191	Q9NR56-3;Q9NR56-4;Q9NR56-7;Q9NR56-6;C9JP00;Q9NR56-2;Q9NR56-5;Q9NR56;B4E3F7;O95205;H7C4T5;Q9NUK0-2;B1AKI6;Q9NUK0;Q5VZF2-3;Q5VZF2-2;Q5VZF2	1.3107	D6RDJ3;E7EQB9;O15160-2;O15160;H0Y723	1.1227
P17480-2;E9PKP7;P17480	0.99478	E5RI99;P62888;E5RJH3	1.0188	D6REN6;P12081;B4DDD8;B3KWE1;E7ETE2;J3KNE5;P12081-2;B4E1C5;C9JWK3;C9JV49;B4DDY8;P49590;B4DQ67;C9JHI8;E9PG66;D6RF05;D6RJE6	0.93319	H7C3C2;F8W954;F8WF98;H7C2M8;H7C0W2;C9JHL4;Q9H3P2	NaN	C9JP16;O75718	1.0251	J3KNE5;P12081-2;D6REN6;P12081;B4E1C5;B4DDD8;B3KWE1;E7ETE2;C9JWK3;C9JV49;B4DDY8;P49590;D6RF05;D6RJE6;B4DQ67;C9JHI8;E9PG66	0.82598
E9PL22;Q9Y4L1;B7Z909;E9PJ21	1.0596	E5RIW3;O75347;E5RJD8;B4DT30;E5RIX8;E5RHG6	0.97798	D6RGI3;Q9NVA2;D6RER5;Q9NVA2-2;D6RDU5;D6RDP1;D6R9Y6;H0Y9G8;H0Y961;Q14141-3	1.1114	F8W0M9;C9JID8;Q0VDG4-2;Q0VDG4	0.73994	G5E9W8;P46976-3;C9JQ42;D3DNH0;P46976-2;P46976;C9J8R8;C9J7C7	1.0566	D6RGI3;Q9NVA2;D6RER5;Q9NVA2-2;D6RDP1;D6R9Y6;D6RDU5;H0Y9G8;H0Y961;Q14141-3;Q14141-2;Q14141-4;B1AMS2;Q14141;F5H1J5	1.1089
E9PLK3;P55786;B7Z463;H0YDG0;F5GZY4;E5RJ24;E7EWZ2;A6NEC2;H0YCQ5;A6NEC2-2;H0YAQ6;E9PJ74;L7N488;E9PRQ5;E9PP11	0.95879	E5RJ68;O00203;H0YBD0	1.0811	D6RFH4;H3BUX2;O43169;J3KNF8;J3QR91	0.88654	P13798;C9JIF9;H7C393;F8WEH5;C9JLK2;H7C1U0	1.0331	O60828-6;C9JQA1;O60828-3;O60828-2;O60828;O60828-10;O60828-9;O60828-8;O60828-7;O60828-5;O60828-4	0.92471	D6RFH4;H3BUX2;O43169;J3KNF8	1.0664
E9PLL6;P46776;E9PJD9;E9PKT2;H0YF34;E9PLX7	1.0641	E7ERH2;F8W8N3;P63208-2;P63208;E5RJR5	1.563	D6RFM5;P31040;E9PBJ5;H0Y8X1	0.9521	C9JIG9;O95747	1.0065	Q9NX63;C9JRZ6;F8WAR4;G3V1K1	1.061	D6RFM5;P31040;E9PBJ5;H0Y8X1	0.99189
E9PNT8;Q9Y6C9;E9PIE4	1.3055	E7EM64;Q7L5N1;H7C3T0	1.0564	D6RFW1;Q96EQ0	0.91832	F2Z2Y6;C9JIZ0;C9JNV3;O95777	1.0264	Q5JRX3;Q5JRX3-2;C9JSL2;Q5JRX3-3;H0Y7L7;B1APQ0	1.0889	Q9BT78;D6RFN0;D6RD63;D6RAX7;Q9BT78-2	0.97847
E9PP73;P53618	0.9349	E7EUI7;E7EMN6;Q6NXS1;P41236	0.94357	D6RG15;Q6IBS0	1.5315	P82930;C9JJ19;H3BP88	1.1626	C9JTN7;P31483-2;F8W8I6;P31483;H7BY49;Q96B58;E5RGV5;E5RG67	0.98899	D6RG15;Q6IBS0;H0Y858	0.68319
E9PPI9;Q9NPD3	0.77893	E7ENQ1;O95819-4;G3XAA2;H7C360;O95819-2;O95819;O95819-5;E7EN19;E7ESS2;O95819-3;G5E948;H7C3Z6;C9J338;I3L2I2;E7EX83;C9J840;H7C0P6;Q9UKE5-8;Q8N4C8-5;Q9UKE5-5;Q8N4C8-2;Q9UKE5-7;Q8N4C8-3;Q9UKE5-3;Q8N4C8-4;F5H5M9;Q9UKE5-6;Q9UKE5-2;Q8N4C8;F5H865;Q9UKE5-4;Q9UKE5	0.93061	Q9NRP0;D6RH22	0.93355	C9JLF4;Q9NVH0-2;Q9NVH0	1	Q9H857-4;Q9H857-3;Q9H857-2;Q9H857;C9JTZ6;E9PAL9;C9J036;H7C519;H7C4G8	0.71562	Q9NRP0;D6RH22	0.82548
P62861;E9PR30	1.0624	H0Y6T7;E7ENA9;F6Y097;Q92542-2;Q92542;Q5T205;H0Y3Z4	0.91076	D6RIC3;Q9Y3C1;Q9Y3C1-2	1.0276	I3L2L5;C9JLW8;I3L317;I3L4Q0	1.3552	F5H6I7;Q6DD88;C9JUU1	0.88608	D6RIC3;Q9Y3C1;Q9Y3C1-2	1.1231
F2Z2T0;Q3YEC7-3;Q3YEC7;Q3YEC7-2;Q3YEC7-4;Q3YEC7-5;Q3YEC7-6;G3V154;G8JLF3	0.52107	E7ENN3;Q8NF91-4;E9PEL9;Q8NF91;Q8NF91-7;H0Y326;H0Y325;Q8NF91-8;Q8NF91-2	1.1367	O43865-2;Q96HN2-4;Q96HN2-3;D7UEQ7;H0Y8B3;O43865;F8W7N8;Q96HN2-2;Q96HN2	1.3448	C9JM78;C9JQ90;Q02338;C9JEB9;H7C2W1;C9K0G7;E9PCG9	NaN	C9JVE2;Q96GG9;C9JRU6;C9J0B2;C9JUW4;C9J8R4	0.863	O43865-2;Q96HN2-4;Q96HN2-3;D7UEQ7;H0Y8B3;O43865;F8W7N8;Q96HN2-2;Q96HN2	0.93261
F5GWH5;P61165	0.90737	P19367-4;P19367-2;P19367;P19367-3;E7ENR4;B1AR62;B1AR61;B1AR63;Q2TB90;Q2TB90-3;Q2TB90-2;E9PB90;P52789;P52790	0.96567	E1P5S2;Q14498-3;Q14498-2;Q14498;G3XAC6;H0Y4X3;Q5QP23;G3V546;G3V5Z6;Q5QP22;Q5QP21;H0YJJ3;G3XAP0;Q86U06-3;Q86U06-4;Q86U06-5;Q86U06-2;Q86U06	0.96578	C9JP35;C9JMN4;Q92520	0.75719	Q9H9P8-2;C9JVN9;Q9H9P8;G3V5S1;G3V272	1.1854	E1P5S2;Q14498-3;Q14498-2;Q14498;H0Y4X3;G3XAC6;Q5QP23;G3V546;G3V5Z6;Q5QP22;Q5QP21;H0YJJ3;G3XAP0;Q86U06-3;Q86U06-4;Q86U06-5;Q86U06-2;Q86U06	0.90647
F5GWX5;Q14839;Q14839-2;Q5TG85;K7EMY3;Q8TDI0;Q12873-2;Q12873;E9PG89	0.73083	P55265-5;P55265;P55265-4;E7ENU4;P55265-3;H0YCK3;P55265-2	0.96921	E2QRG8;Q00765	0.77648	C9JXB8;C9JNW5;P83731	0.95807	C9JX83;O00566	0.86667	E2QRG8;Q00765	0.9809
F5GX50;F5GXT8;F5H796;Q9NR28-2;Q9NR28-3;Q9NR28	1.1382	E7EPB3;P50914	0.95918	E2QRI1;Q32P28-2;Q32P28;Q32P28-3	0.94965	Q9NR56-3;Q9NR56-4;Q9NR56-7;Q9NR56-6;C9JP00;Q9NR56-2;Q9NR56-5;Q9NR56;B4E3F7;O95205;H7C4T5;Q9NUK0-2;B1AKI6;Q9NUK0;Q5VZF2-3;Q5VZF2-2;Q5VZF2	1.1799	C9JYN0;Q16563-2;Q16563	NaN	E2QRI1;Q32P28-2;Q32P28;Q32P28-3	1.3037
P26358;F5GX68;P26358-2;K7EMU8;K7EJL0	1.0725	Q16181-2;E7ES33;E7EPK1;Q16181;B4DNE4;G3V1Q4;H0Y3Y4;H0YFF6;Q5JXL7;F5GZE5;Q6ZU15	0.98858	E9PBA6;E3W994;J3KR49;O75122;F5H604;E7ERI8;E7EW49;H0Y5T1;F5H3X0;F5H2E2;F5GWM7;Q7Z460-2;E7EUA5;B7ZLX3;F5GWS0;Q7Z460-3;F8WA11;Q7Z460	1.0468	C9JP16;O75718	0.69223	O60716-24;O60716-23;O60716-21;O60716-19;O60716-22;O60716-20;O60716-16;O60716-18;O60716-15;O60716-17;O60716-13;O60716-11;O60716-14;O60716-12;O60716-10;O60716-8;O60716-9;O60716-7;O60716-5;C9JZR2;O60716-3;O60716-6;O60716-4;O60716-2;O60716;O60716-32;O60716-31;O60716-29;O60716-27;O60716-30;O60716-28;O60716-26;O60716-25;E9PKY0;E9PRE2	1.0111	E9PRZ9;E3W975;E9PM92;O00193	1.1885
F5H895;F5GXX5;P61803	0.91462	E7EQB8;E9PDD5;P51553;E9PF84;G5E9Q7;H7C1R3;H7C1W2;H0Y5Q7	1.3054	O60313;E5KLK1;E5KLJ6;E5KLJ9;O60313-2;E5KLJ5	0.82026	C9JQ41;H7C525;Q4VC31;C9JBU9	1.2767	H0Y6A0;C9JZR4;E9PB03;Q9NP61	NaN	E9PBA6;E3W994;J3KR49;O75122;F5H604;E7ERI8;E7EW49	0.82906
F5GY37;Q99623;J3KPX7;B4DW05;Q99623-2;F5H3X6;F5GWA7;F5H0C5;F5H2D2;F5H0S4	1.0793	E7EQT4;Q9UKV3-5;Q9UKV3;G3V3B0;Q9UKV3-3;Q9UKV3-2;G3V3T3	0.98681	E5RFP0;Q8WVJ2	2.3153	O60828-6;C9JQA1;O60828-3;O60828-2;O60828;O60828-7;O60828-4;O60828-10;O60828-9;O60828-8;H7C053;O60828-5	0.89795	C9K058;Q9H2H8;H7BZ14	0.88613	O60313;E5KLK1;E5KLJ6;E5KLJ9;O60313-2;E5KLJ5	1.1337
F5GYK7;F8W6E4;P43304-2;P43304	1.8681	E7ES08;E7EQU1;O15347;E9PES6	1.0236	H0YBG2;E5RFX7;E5RG77;H0YBB9;O94903	1.0737	C9JR60;J3KTK0;J3KSW6;Q8IX18-3;C9JEW8;Q8IX18-2;Q8IX18	1.2218	E7ENM1;E7EPD2;D2KFR9;P42224-2;J3KPM9;P42224	0.94934	H0YBG2;E5RFX7;E5RG77;H0YBB9;O94903	1.0219
F5GYN4;Q96FW1;J3KR44;F5H6Q1;F5GYJ8;F5H3F0;Q96FW1-2	1.0072	E7EQV9;P61313;E7ENU7;E7EX53;P61313-2;E7ERA2	1.9577	E5RGN3;O00244;E5RIM7	1.0344	Q9NX63;C9JRZ6;F8WAR4;G3V1K1	0.98781	P78344-2;H0Y3P2;P78344;D3DQV9;E9PKF8;H0YD77;H0YCH5;H0YE22;H0YEC5	1.0599	E5RGN3;O00244;E5RIM7	0.9365
F5GZ76;F5H4X1;O60763;F5GYR8;O60763-2;H0Y7C0	1.4645	Q5QPM9;E7ER20;Q5QPM7;Q92530	1.9123	E5RGS4;O60925;D6RGG5	0.99947	Q5JRX3;Q5JRX3-2;C9JSL2;Q5JRX3-3;B1APQ0;H0Y7L7	0.98815	D3YTB1;P62910;F8W727;D3YTI8	1.1087	E5RGS4;O60925;D6RGG5	0.93947
F5GYX7;P09238	0.57106	P30566;E7ERF4;P30566-2	0.70189	E5RGX5;Q93045;Q93045-2	1.074	C9JTN7;P31483-2;E7ETC0;H7BY49;A6NKZ9	1.161	H0YFD2;D3YTE0;Q8N9T8-2;Q8N9T8	1.0046	E5RGX5;Q93045;Q93045-2	0.82195
F5GZ27;K7EJE8;K7EKE6;Q8N8K8;P36776;K7ER27	2.4196	E7ES32;Q96EY1-2;Q96EY1	1.1008	E5RH83;E5RIH5;E5RIZ0;Q6NXR4	0.55865	H7C519;Q9H857-4;Q9H857-3;Q9H857-2;Q9H857;C9JTZ6;E9PAL9	0.87999	D6RAY7;D6R9P4;P46926;B7Z3X4;E7EVU7;D6RFF8;D6RB13;Q8TDQ7-3;Q8TDQ7;D6R917;B4DJF3;Q2VYF1;Q8TDQ7-2	0.91574	E5RHG8;Q15369;Q15369-2;E5RJ89	0.90516
F5GZJ1;Q15021;E7EN77	1.1944	O95757;E7ES43;E9PDE8;D6RJ96	0.99444	E5RHC5;Q8N6T3-3;Q8N6T3;Q8N6T3-2;E5RIU2;F8VWB3;E5RGL6;E5RHT6;F8W1U7;F8VWH9;E7EV62	0.96993	C9JXK9;C9JUT4;Q93052	1.5116	D6RBF6;D6RFG2;D6R9U8;D6RIR6;Q9BUT1-2;Q9BUT1	0.85174	E5RHW4;O94905;E5RJ09	1.0896
P08195-2;P08195-3;F5GZS6;P08195;J3KPF3;P08195-4;F5GZI0;H0YFX4;F5H867;F5H0E2;H0YFS2	0.86818	E7ESS1;P04637-8;P04637-9;P04637-7;P04637-5;P04637-6;P04637-2;J3KP33;P04637-3;P04637-4;P04637;E9PFT5;E7EQX7	0.40967	E5RHG8;Q15369;Q15369-2;E5RJ89	0.96215	F8W7P7;C9JW18;O75717	0.88906	Q9UHY7-2;D6RA00;Q9UHY7	1.1237	G3V117;E5RHX8;Q9NPA8	1.1775
K7ENF1;K7ESC7;F5H0M0;Q15067-3;Q15067-2;Q15067	0.86636	E7ESU4;Q9H0A0	1.0239	E5RHW4;O94905;E5RJ09;B0QZ43;O75477;O94905-2;O94905-3	0.93162	C9JX83;O00566	NaN	D6RFM0;P62837-2;D6RAH7;H9KV45;P62837;P61077;P61077-2;P61077-3;D6RAW0;H0YGA2;D6RA11;Q9UQL0;C9J9H9;Q9Y2X8;P51668	0.97221	E5RI99;P62888;E5RJH3	1.0408
Q9Y536;F5H284;A2BFH1	1.0075	Q13330-3;E7ESY4;Q13330;H0YIT0;E9PF88;C9JJM0;H0YIV8;F8W9Y9;E9PCS8;Q13330-2;H0Y4T7;E7EQY4;Q9BTC8-2;E7EV10;Q9BTC8	0.88638	G3V117;E5RHX8;Q9NPA8	0.83527	C9JYN0;Q16563-2;Q16563	NaN	D6RFM7;D6RAP6;Q9UJX5-2;Q9UJX5;E9PCR4	0.76405	E5RIW3;O75347;E5RJD8;B4DT30;E5RIX8;E5RHG6	0.98896
Q1M185;Q1M188;Q1M186;F5H2U8;Q1M187;P52926-2;P52926;F5H2A4;F5H6H0	0.69433	O95299;E7ESZ7;Q8WXC9;Q8N1B9;C9J6X0	0.74065	E5RI99;P62888;E5RJH3	1.0728	O60716-24;O60716-23;O60716-21;O60716-19;O60716-22;O60716-20;O60716-16;O60716-18;O60716-15;O60716-17;O60716-13;O60716-11;O60716-14;O60716-12;O60716-10;O60716-8;O60716-9;O60716-7;O60716-5;C9JZR2;O60716-3;O60716-6;O60716-4;O60716-2;O60716;O60716-32;O60716-31;O60716-29;O60716-27;O60716-30;O60716-28;O60716-26;O60716-25;E9PKY0;E9PRE2	1.0367	D6RB19;D6RHV0;F5H7P7;Q96BP3	0.85378	E5RJ68;O00203	1.198
F5H2A7;P61758	1.278	P62847-2;E7ETK0;P62847-3;P62847;P62847-4	1.1212	E5RIW3;O75347;E5RJD8;B4DT30;E5RIX8;E5RHG6	1.0233	E7ENM1;E7EPD2;D2KFR9;P42224-2;J3KPM9;P42224	1.0136	D6RBV2;Q12907;D6RDX1;D6RIU4;D6RBH1	1.0947	E5RJA0;O75608-2;O75608	1.5051
P11586;G3V2B8;F5H2F4;G3V3L6	1.0393	E7ETQ7;Q5TGM0;Q9NP79	1.0842	E5RJ68;O00203;H0YBD0	1.0393	D3YTB1;P62910;F8W727;D3YTI8	1.0758	P06730;P06730-3;D6RBW1;P06730-2;H0Y8J7;D6RHE2;H0Y8X3;A6NMX2	1.131	E7ERH2;F8W8N3;P63208-2;P63208;E5RJR5;E5RGM3	0.81158
F5H335;Q14152	1.0038	P60953;E7ETU3;P60953-1;Q5JYX0	0.96561	E5RJA0;O75608-2;O75608;E5RGR0	1.1742	D3YTE0;Q8N9T8-2;Q8N9T8;H0YFD2	0.76081	D6RC52;D6RCB9;Q9NX24;H0YC83;J3QSY4	1.2381	E5RJY1;E7ESM1;Q92597-3;E9PDL6;Q92597-2;Q92597	0.91974
G3V1P4;G5EA58;F5H345;P08397-2;P08397	0.88846	P50395;E7EU23;P50395-2;Q5SX87;Q5SX91;Q5SX90;Q5SX86	0.95405	P63208;E5RJR5;E5RGM3;E7ERH2;F8W8N3;P63208-2	0.87978	E7EWK1;F5H1L4;E7ENA2;Q9NNW7-2;D3YTF8;F5H2V0;D3YTF9;Q9NNW7;Q9NNW7-3	1.1002	D6RCD0;Q8NBQ5	1.3971	E7EM64;Q7L5N1	0.87208
P05023-3;P05023;F5H3A1;P05023-2;M0R116;B1AKY9;P13637;P50993;F5H6J6;B7Z2T0;H0Y7C1;Q5TC01;Q13733;Q5TC02;M0QXF2;E9PRA5;P20648;P54707;P54707-2	1.2389	E7EU96;Q8NEV1;P68400;P68400-2	1.0132	E7EM64;Q7L5N1;H7C3T0	0.92444	D6PSQ9;P49903;Q5T5U9;B4DWK0;Q5T5U6;Q5T5U7	0.88014	Q8N5K1;D6RCF4	1.113	O14617-3;E7EMM2;O14617-4;O14617-2;G5E988;O14617;O14617-5	1.0042
F5H3X9;P30153;B3KQV6;C9J9C1;E9PH38;P30154-4;P30154;P30154-3;P30154-2;H0YDG7;J3KR29;A8MY67	0.96368	F5GYC1;P28288;E7EUE1;P28288-2	1.193	E7EUI7;E7EMN6;Q6NXS1;P41236	0.90502	H0Y9L5;D6R905;Q06265-3;Q06265-4;D6RIY6;Q06265;Q06265-2	0.9892	D6RCK3;Q9H8S9-2;H7BZ12;Q9H8S9;Q7L9L4;Q7L9L4-2	0.86924	E7EUI7;E7EMN6;Q6NXS1;P41236	1.0553
Q5T8N1;F5H5C2;Q8WUM0	0.86923	F8W0A9;E7EUE5;P05091;F8VXI5;F8VP50	0.89649	H0Y6T7;E7ENA9;F6Y097;Q92542-2;Q92542;Q5T205;H0Y3Z4	1.0964	D6R9C3;P14406;D6RIE3;D6RGV5;H0UI06	0.92583	D6RCP9;P27707;D6RFG8	NaN	H0Y6T7;E7ENA9;F6Y097;Q92542-2;Q92542;Q5T205;H0Y3Z4	0.79423
Q9BQE3;F5H5D3;F8VVB9;F8VQQ4;F8VRZ4;F8VS66;F8VWV9;F8VX09;C9JEV8;C9JQ00;C9JJQ8;A6NHL2-2;A6NHL2;C9JDL2;C9K0S6;F8VRK0;F8VXZ7;F8VS94;F8VYI2;F8VXB8;F8W0F6;Q9H853	1.1108	E7EUY0;P78527-2;P78527;H0YG84	1.0378	P19367-4;P19367-2;P19367;P19367-3;E7ENR4;B1AR63;B1AR62;B1AR61;E9PB90;P52789;Q2TB90;Q2TB90-3;Q2TB90-2;P52790	0.97145	D6RCT6;D6RIA0;D6R9E3;Q9BWT6	0.99948	D6RDJ3;E7EQB9;O15160-2;O15160;H0Y723	1.316	P19367-4;P19367-2;P19367;P19367-3;E7ENR4;E9PB90;P52789;B1AR62;B1AR61;B1AR63;Q2TB90;P52790;Q2TB90-3;Q2TB90-2	1.0178
Q12849-5;F5H5I6;H0Y8R1;H0YAK1;Q12849;H0YAM1	1.0471	P27816-2;P27816-6;P27816;E7EVA0;P27816-5;B9ZVR1;H0Y2V1;F8W9U4;P27816-4;E9PGM5;B4DSQ1;H7C4C5;B5MEG9;H7C456;P27816-7	0.97937	P55265-5;P55265;P55265-4;E7ENU4;P55265-3;H0YCK3;P55265-2	0.97458	D6RAY7;D6R9P4;P46926;B7Z3X4;E7EVU7;D6RFF8;D6RB13;Q8TDQ7-3;Q8TDQ7;D6R917;B4DJF3;Q2VYF1;Q8TDQ7-2	0.95352	J3KNE5;P12081-2;D6REN6;P12081;B4E1C5;B4DDD8;B3KWE1;C9JWK3;E7ETE2;D6RF05;C9JV49;B4DDY8;P49590;D6RJE6;B4DQ67;C9JHI8;E9PG66	0.99728	P55265-5;P55265-3;H0YCK3;P55265-2;P55265;P55265-4;E7ENU4	0.93036
H3BNH3;H3BR91;Q15572-2;F5H647;Q15572-6;Q15572	0.99603	E7EVD1;O43395;B4DSY9	1.0501	E7EP00;P53992;G5EA31;B4DZT4	0.84765	Q9UHY7-2;D6RA00;Q9UHY7	1.0472	D6RGI3;Q9NVA2;D6RER5;Q9NVA2-2;D6RDU5;D6RDP1;D6R9Y6;H0Y9G8;H0Y961;Q14141-3;Q14141-2;Q14141-4;B1AMS2;Q14141;F5H1J5	1.0518	E7EP00;G5EA31;P53992;B4DZT4	0.81065
H7BYW1;F5H668;H0YGL6;P20340-2;P20340;C9JU14;J3KR73;F5GZB1;B7Z337;Q9NRW1;C9JB90;F5GXN4;Q14964	1.0339	G5E9S8;Q07866-8;G3V2E7;Q07866-2;Q07866-3;Q07866;F8W6L3;Q07866-7;G3V3H3;Q07866-5;Q07866-10;Q07866-6;G3V5R9;Q07866-4;Q07866-9;E7EVH7	1.0099	E7EPB3;P50914	0.9738	D6RAW0;D6RFM0;P62837-2;D6RAH7;H9KV45;P62837;P61077;P61077-2;P61077-3;H0YGA2;D6RA11;Q9UQL0;C9J9H9;Q9Y2X8;P51668	1.0458	D6RFH4;H3BUX2;O43169;J3KNF8;J3QR91	0.93772	E7EPB3;P50914	0.93778
F5H6T1;P61160;P61160-2	1.1337	Q9UM54-6;E7EW20;Q9UM54-5;Q9UM54-2;Q9UM54-4;Q9UM54-1;Q9UM54	1.5064	Q9Y520-3;Q9Y520-6;Q9Y520-4;E7EPN9;Q9Y520-5;Q9Y520;Q9Y520-7;Q9Y520-2	0.86865	D6RFM7;D6RAP6;Q9UJX5-2;Q9UJX5;E9PCR4	0.61561	D6RFM5;P31040;E9PBJ5;H0Y8X1	0.99262	Q16181-2;E7ES33;E7EPK1;Q16181;B4DNE4;G3V1Q4;H0Y3Y4;H0YFF6;F5GZE5;Q5JXL7;Q6ZU15	0.83399
Q9Y277;Q9Y277-2;F5H740;E5RK27;E5RFP6;E5RJN6;E5RHZ6;E5RHE1	1.3068	E9PID8;P33240-2;P33240;E7EWR4;Q9H0L4	NaN	P19404;E7EPT4	1.003	D6RB19;D6RHV0;F5H7P7;Q96BP3	1.1442	Q9BT78;D6RFN0;D6RAX7;Q9BT78-2;D6RD63	0.97519	Q9Y520-3;Q9Y520-6;Q9Y520-4;E7EPN9;Q9Y520-5;Q9Y520;Q9Y520-7;Q9Y520-2	0.85599
O95197-3;O95197-4;F5H774;O95197-2;O95197	1.6352	P68036-2;P68036;E7EWS7	0.84907	E7EQ69;Q9GZZ1;C9J5J3;Q9GZZ1-2;B0AZT5;C9J5D1	1.3403	D6RBV2;Q12907;D6RDX1;D6RIU4;D6RBH1	0.94872	D6RFW1;Q96EQ0	1.0716	P19404;E7EPT4	0.91442
F5H7E2;P42285	0.83128	E7EWT1;P39656	1.0217	F5GX39;E7EQ72;Q15363	0.826	P06730;P06730-3;D6RBW1;P06730-2;H0Y8J7;D6RHE2;H0Y8X3;A6NMX2	1.1215	D6RG15;Q6IBS0;H0Y858	1.1196	E7EQ69;Q9GZZ1	1.038
F5H7V7;P51970	NaN	P23588;E7EX17;B4DS13;F8VX11;F8W0K0;F8VRU1;F8VYE9;F8VSC7;F8VP89	1.0295	E7EQB8;E9PDD5;P51553;E9PF84;G5E9Q7;H7C1W2;H7C1R3;H0Y5Q7	0.9977	D6RC52;D6RCB9;Q9NX24;H0YC83;J3QSY4	1.0412	D6RHW1;D6RIY1;D6RGK3;D6RIV9;D6RIE8;Q9HBM6;Q16594	0.6236	F5GX39;E7EQ72;Q15363	0.94061
F5H897;Q12931;I3L0K7;I3L239	1.0456	E7EXA3;Q9GZT8-3;Q9GZT8-2;Q9GZT8	1.0821	E7EQT4;Q9UKV3-5;Q9UKV3;G3V3B0;Q9UKV3-3;Q9UKV3-2;G3V3T3	0.8966	D6RCP9;P27707;D6RFG8	NaN	P14406;D6RIE3;D6RGV5;H0UI06;D6R9C3	0.98652	E7EQB8;E9PDD5;P51553;H7C1R3;H0Y5Q7;E9PF84;G5E9Q7	0.88293
M0QYS5;F5H8D7;P18887	0.76303	Q8IY67-2;E9PAU2;Q8IY67	0.94502	E7ES08;E7EQU1;O15347;E9PES6	0.97241	D6RDJ3;E7EQB9;O15160-2;O15160;H0Y723	1.1717	Q9NRP0;D6RH22	0.87757	E7EQG2;Q14240;Q14240-2;Q9NZE6;J3KSN7;E7EMV8	0.9231
I3L2P8;F5H8J2;H7BZ94;P07237;I3L398;H0Y3Z3;I3L312;I3NI03;I3L4M2;I3L0S0;I3L3U6;I3L1Y5;I3L514;I3L3P5	0.93477	F8W1N5;F8VZJ2;F8VNW4;F8W0W4;H0YHX9;Q13765;Q13765-2;E9PAV3;F8VZ58;Q9BZK3	1.0439	Q9UI10-3;Q9UI10;Q9UI10-2;E7ERK9	0.99805	D6RGE2;D6RE73;E7ENF9;Q96CN7	0.95313	O43865-2;Q96HN2-4;Q96HN2-3;D7UEQ7;H0Y8B3;O43865;F8W7N8;Q96HN2-2;Q96HN2	0.81204	E7EQT4;Q9UKV3-5;Q9UKV3;G3V3B0;Q9UKV3-3;Q9UKV3-2;G3V3T3	0.97842
F6S4E6;F6QYI9;F6R6M7	NaN	E9PAV9;Q5T3I0;Q5T3I0-3;E9PPY4;Q5T3I0-2;F2Z3C6;F8W895	0.9664	O95757;E7ES43;E9PDE8;D6RJ96	0.86957	D6RGI3;Q9NVA2;D6RER5;Q9NVA2-2;D6RDU5;D6RDP1;D6R9Y6;H0Y9G8;H0Y961;Q14141-3	1.146	E2QRG8;Q00765	0.9544	E9PES6;E7ES08;E7EQU1;O15347	0.88823
F6SBX2;Q9NSE4	1.0749	O00139-2;O00139-1;E9PB70;O00139;O00139-4	0.76384	E7ESS1;P04637-8;P04637-9;P04637-7;P04637-5;P04637-6;P04637-2;J3KP33;P04637-3;P04637-4;P04637;E9PFT5;E7EMR6;E7EQX7	0.88451	D6RFH4;H3BUX2;O43169;J3KNF8;J3QR91	0.88151	Q9NYP7-3;E2QRH7;Q9NYP7;Q9NYP7-2	1.0517	E7EQV9;P61313;E7ENU7;E7EX53;P61313-2;E7ERA2	2.2471
F8VPD4;P27708;H7C2E4;H7BZB3	0.9874	Q5SNT2-2;E9PBR6;Q5SNT2	0.89465	E7ESU4;Q9H0A0;E9PJN6;E9PMU0	0.88145	D6RFM5;P31040;E9PBJ5;H0Y8X1	0.9822	E9PBA6;E3W994;J3KR49;O75122;F5H604;E7ERI8;E7EW49	0.95645	E9PCS8;Q13330-2;E7EQY4;Q9BTC8-2;E7EV10;Q9BTC8;Q13330-3;E7ESY4;Q13330;H0YIT0;E9PF88	1.2065
Q13838;Q13838-2;F8VQ10;Q5STU3;B4DP52;F6UN21;F6TRA5;F6WLT2;F6UJC5;H0Y400;B4DIJ6;H0YCC6	0.97609	Q8NBJ7-2;E9PBT8;Q8NBJ7;J3KQJ1;F8WEX5;E9PG02;Q8NBJ7-5;J3QT17;C9JL30;A8MXB9;Q8NBJ7-3;C9J660;F8WA42	0.4395	Q13330-3;E7ESY4;Q13330;Q13330-2;H7C3F3;H0YIT0;E9PF88;C9JJM0;H0YIV8;F8W9Y9;E9PCS8;H0Y4T7;E7EQY4;Q9BTC8-2;E7EV10;Q9BTC8	0.79001	D6RFW1;Q96EQ0	1.0478	O60313;E5KLK1;E5KLJ6;E5KLJ9;O60313-2;E5KLJ5	0.90548	P30566;E7ERF4;P30566-2	1.0249
F8VS07;Q9UHB6-3;F8VQE1;Q9UHB6-2;Q9UHB6;F8VRN8;Q9UHB6-4	0.72012	E9PBU3;P31939;F5GWY2;H7C084;H7C1S2;C9JLK0;F8WEF0;H7BZU3	0.98191	O95299;E7ESZ7;Q8WXC9;Q8N1B9;C9J6X0	0.85858	D6RG15;Q6IBS0;H0Y858	1.0192	E5RFF9;Q9BRT9	0.98394	Q9UI10-3;Q9UI10;Q9UI10-2;E7ERK9	1.3361
F8VZQ7;F8W0B5;H0YH87;Q99700-2;Q24JQ7;F8WB06;F8VQP2;Q99700-4;Q99700	0.98719	E9PBY7;E9PQ61;O75152	0.86305	P62847-2;E7ETK0;P62847-3;P62847;P62847-4	1.1373	D6RHW1;D6RIY1;D6RGK3;D6RIV9;D6RIE8;Q9HBM6;Q16594	0.8425	E5RFI2;Q9BYD1	1.1738	O95757;E7ES43;E9PDE8;D6RJ96	0.76516
P09651-3;F8VXY0;F8VRQ1;P09651-2;F8W6I7;P09651;F8VSB5;F8W1S7;F8VZ49;F8VTQ5;F8W646;Q32P51;J3KQA8;H0YH80;F8VYN5	1.0928	E9PG39;E9PC15;Q53H12	1.1519	P60953;E7ETU3;P60953-1;Q5JYX0	0.95216	Q9NRP0;D6RH22	0.94802	E5RFX7;E5RG77;H0YBB9;O94903;H0YBG2	1.0368	Q9NWU5-2;Q9NWU5-3;Q9NWU5;E7ESL0;J3KQY1	1.6918
F8VXB1;F8VUC5;F8W156;F8VS17;F8VYZ4;P61923;F8VVA7;F8W651;F8VXR1;F8VWL5	1.0749	Q8IWS0;E9PC97;Q8IWS0-2;Q5JRC6;B4E0G4	1.1281	E9PF06;P09001;H0Y9G6;E7ETU7	1.0602	D6RHC4;Q8IWZ3-5;Q8IWZ3-3;Q8IWZ3-2;O75179-5;O75179-3;E9PDP5;O75179-4;G5E964;H0YM23;E7EUV3;Q8IWZ3;Q8IWZ3-4;O75179-2;O75179;Q8IWZ3-6	0.6817	E5RGF9;E7ESJ7;Q9NRY5	0.91638	E7ESS1;P04637-8;P04637-9;P04637-7;P04637-5;P04637-6;P04637-2;J3KP33;P04637-3;P04637-4;P04637;E9PFT5;E7EQX7;E7EMR6	0.83145
F8VUA2;F8VVT7;Q9HD42;F5H875	0.94944	E9PCI9;P14324	1.0154	Q13428-8;Q13428-7;E7ETY2;Q13428-3;Q13428-2;J3KQ96;Q13428-6;Q13428;Q13428-4;E9PHK9;H0YA99;Q13428-5	0.93069	D6RIC3;Q9Y3C1;Q9Y3C1-2	0.91479	E5RGG1;H9KVE0;Q9UJW0-2;Q9UJW0;Q9UJW0-3	NaN	E7ESU4;Q9H0A0	0.79974
F8VUA6;F8VWC5;H0YHA7;Q07020;J3QQ67;F8VYV2;G3V203	1.1977	E9PFG7;F5H801;Q02218-2;Q02218;E9PDF2;E9PCR7;Q9ULD0-3;Q9ULD0-2;Q9ULD0	0.16613	P50395;E7EU23;P50395-2;Q5SX87;Q5SX91;Q5SX90;Q5SX86	1.0045	E2QRG8;Q00765	0.94533	E5RGN3;O00244;E5RIM7	1.0579	P62847-2;E7ETK0;P62847-3;P62847;P62847-4	1.1751
F8VVL1;O43583	0.9707	E9PCX7;Q13423;D6RAI5	1.0968	E7EU96;Q8NEV1;P68400;P68400-2	0.97225	E9PBA6;E3W994;J3KR49;O75122;F5H604;E7ERI8;E7EW49;H7C5M8;H0Y5T1;F5H3X0	1.1083	E5RGS4;O60925;D6RGG5	0.97342	P60953;E7ETU3;P60953-1;Q5JYX0	0.85723
F8VVM2;Q00325-2;Q00325;F8VZL5;F8VWR4;F8VWQ0	1.0214	E9PCY5;Q02880-2;Q02880	1.2569	Q16851-2;Q16851;E7EUC7;C9JWG0;C9JVG3;C9JQU9;C9JNZ1;F2Z3H1;C9JTZ5;C9JUW1	0.86802	O60313;E5KLK1;E5KLJ6;E5KLJ9;O60313-2;E5KLJ5	1.1444	E5RGX5;Q93045;Q93045-2	0.90796	E9PF06;P09001;H0Y9G6;E7ETU7	1.0277
F8VXJ7;Q9Y2B0;F8W031;H0YI18;F8W1K5	1.2692	E9PD53;Q9NTJ3;Q9NTJ3-2;C9JR83;C9JVD8;C9J578;C9J9E4;C9JWF0;C9IYK2;C9JJ64	2.3266	F5GYC1;P28288;E7EUE1;P28288-2	1.0215	E5RFF9;Q9BRT9	1.0202	E5RH51;Q96EX1	0.94576	Q13428-5;Q13428-2;Q13428-8;J3KQ96;Q13428-6;Q13428-7;Q13428;E7ETY2;Q13428-3;Q13428-4;E9PHK9;H0YA99	1.0916
Q9UBQ0;Q9UBQ0-2;H3BLV8;F8VXU5	0.96242	F5H861;E9PL69;E9PD78;P23921	0.91357	F8W0A9;E7EUE5;P05091;F8VXI5;F8VP50;H0Y2X5;P00352;P47895	1.0065	E5RFX7;E5RG77;H0YBB9;O94903;H0YBG2	0.97538	E5RHC5;Q8N6T3-3;Q8N6T3;Q8N6T3-2;E5RIU2;F8VWB3;E5RGL6;E5RHT6;F8W1U7;F8VWH9;E7EV62	1.03	P50395;E7EU23;P50395-2;Q5SX87;Q5SX91;Q5SX90;Q5SX86	1.0184
G3V213;F8VZG5;P54819-3;P54819-5;P54819-2;F8W1A4;P54819;P54819-4;P54819-6;F8VY04;F8VPP1	1.0858	Q5T9S2;E9PDA0;Q5T9S5-2;E9PFB9;G3V388;Q5T9S5;J3KP97	0.54321	E7EUT4;P04406;E7EUT5;O14556	0.96448	E5RGF9;E7ESJ7;Q9NRY5	0.77052	E5RHG8;Q15369;Q15369-2;E5RJ89	0.97357	E7EU96;Q8NEV1;P68400;P68400-2	0.77195
P35580;P35580-2;F8W6L6;P35580-3;P35580-4;E7ERA5	1.0434	E9PE17;Q9Y2R5;I3L0E3	1.3561	P27816-6;P27816;E7EVA0;P27816-2;P27816-5;B9ZVR1;H0Y2V1;H7C4C5;F8W9U4;P27816-4;E9PGM5;B4DSQ1;H7C456;B5MEG9;P27816-7	0.88625	E5RGN3;O00244;E5RIM7	1.0496	E5RHW4;O94905;E5RJ09;O94905-2;O94905-3;B0QZ43;O75477	0.97806	Q16851-2;Q16851;E7EUC7;C9JWG0;C9JVG3;C9JQU9;C9JNZ1;F2Z3H1;C9JTZ5;C9JUW1	1.0626
F8W720;P49915	1.1277	F5H7M3;H0YDD4;E9PEJ4;P10515	0.95134	E7EVX8;Q8WWY3;Q8WWY3-2;E7ESA8;E7EU94;E7ESX0;Q8WWY3-3;E7EN72	0.906	E5RGS4;O60925;D6RGG5	0.9787	E5RI99;P62888;E5RJH3	1.0355	F5GYC1;P28288;E7EUE1;P28288-2	1.0178
Q14157-4;Q14157-1;Q14157-3;F8W726;Q14157;Q14157-5;Q5VU77;Q5VU81;Q5VU80;Q5VU79;Q5VU78	0.82751	Q9UIA9;E9PEN8	2.7373	Q9UM54-6;E7EW20;Q9UM54-5;Q9UM54-2;Q9UM54-4;Q9UM54-1;Q9UM54	0.86418	E5RGX5;Q93045;Q93045-2	0.94253	E5RIW3;O75347;E5RJD8;B4DT30;E5RIX8;E5RHG6	0.98264	F8W0A9;E7EUE5;P05091;F8VXI5;F8VP50	0.78515
F8W7I9;P46060;H0Y4Q3	1.0243	E9PF10;O75694-2;O75694	1.0768	E9PID8;P33240-2;P33240;E7EWR4;Q9H0L4	1.0274	E5RHG8;Q15369;Q15369-2;E5RJ89	0.94735	E5RJ68;O00203;H0YBD0	1.1117	E7EUT8;Q12874	0.92087
F8W7Q4;Q96A26	0.33994	E9PF19;Q9Y4P3	1.0156	P68036-2;P68036;E7EWS7	0.82229	E5RHW4;O94905;E5RJ09;O94905-2;O94905-3;B0QZ43;O75477	1.0921	E5RJA0;O75608-2;O75608;E5RGR0;E5RJ48	0.92228	P27816-6;P27816;E7EVA0;P27816-2;P27816-5;B9ZVR1;H7C456;H0Y2V1;H7C4C5;F8W9U4;P27816-4;E9PGM5;B4DSQ1;B5MEG9;P27816-7	0.96818
F8W8K5;Q9UMY4-2;Q9UMY4	1.4566	E9PFH8;P05455;E7ERC4;E9PGX9;E9PFL9	0.96779	E9PH64;E7EWZ0;Q9Y6M9;E9PF49	0.83063	G3V117;E5RHX8;Q9NPA8	NaN	E7ERH2;F8W8N3;P63208-2;P63208;E5RJR5;E5RGM3	0.80359	Q9UM54-6;E7EW20;Q9UM54-5;Q9UM54-2;Q9UM54-4;Q9UM54-1;Q9UM54	0.50238
Q9NQC3-3;H7C106;F8W914;Q9NQC3-2;Q9NQC3-5;Q9NQC3-4;F8WAM4;Q9NQC3-6;Q9NQC3	0.77293	Q04637-6;Q04637-5;Q04637-4;Q04637-3;Q04637;E9PFM1;G5E9S1;E7EX73;E9PGM1;E7EUU4;D3DNT2;C9JF13;C9J6B6;C9J2Z7;C9K073;H7C044;F5H8J4;F5H564;Q504Z1;O43432;O43432-3;H7C0V6;REV__C9JBJ8;REV__Q8NEG2;REV__F5H7J8;REV__C9JQZ6;REV__J3KQX6	1.0039	P23588;E7EX17;B4DS13;F8VX11;F8W0K0;F8VRU1;F8VYE9;F8VSC7;F8VP89	1.0517	E5RI99;P62888;E5RJH3	1.0546	E7EM64;Q7L5N1;H7C3T0	0.97724	E7EWK3;Q9H2U1-3;Q9H2U1-2;F5GZS0;Q9H2U1	0.28497
H0Y606;H0Y406;H0Y5Z6;Q5SVK0;H0Y382;Q5SVK5;Q12791-5;H0Y379;Q5SVJ7;Q12791-4;Q5SVJ9;Q5SVK3;Q12791-2;Q5SVJ8;Q12791;Q12791-7;F8WA96;Q12791-3;J3KQ16	NaN	Q96CW1-2;Q96CW1;E9PFW3;C9JJ47	1.13	M0QX29;M0R259;Q9NP81;M0QWZ7;E7EX87;Q9NP81-2;M0R2C6	1.3813	H0YAU9;E5RIM3;Q9Y263	NaN	O14617-3;E7EMM2;O14617-2;G5E988;O14617;O14617-5;O14617-4	1.0464	E9PID8;P33240-2;P33240;E7EWR4;Q9H0L4	0.79565
Q5T378;Q5T376;F8WAN4;Q9P2Q2	0.12526	E9PGT1;Q15631;H7C1D4	0.9746	Q8IY67-2;E9PAU2;Q8IY67;K7EKR9	0.97733	E5RIW3;O75347;E5RJD8;B4DT30;E5RIX8;E5RHG6	1.0024	E7EUI7;E7EMN6;Q6NXS1;P41236	0.97846	P68036-2;P68036;E7EWS7	0.77856
F8WB69;O94888	1.0069	Q99627-2;E9PGT6;Q99627;H7C3S9;B8ZZP3	1.8071	F8VZJ2;H0YHX9;Q13765;Q13765-2;E9PAV3;F8W0W4;F8W1N5;F8VNW4;F8VZ58;Q9BZK3	1.0161	E5RJ68;O00203;H0YBD0	1.1128	E7EMW7;J3KMW7;O95071	1.2741	E9PH64;E7EWZ0;Q9Y6M9;E9PF49	0.92779
F8WBH7;O95456-2;O95456	0.97004	Q86Y56-3;E9PGY2;H0Y650;Q86Y56	9.4377	E9PPY4;Q5T3I0-2;F2Z3C6;E9PAV9;Q5T3I0;Q5T3I0-3	0.71134	E5RJA0;O75608-2;O75608;E5RGR0	1.108	E7ENA9;F6Y097;Q92542-2;Q92542;Q5T205;H0Y6T7;H0Y3Z4;Q5T209	1.0349	F8VX11;P23588;E7EX17;B4DS13;F8W0K0;F8VRU1;F8VYE9;F8VSC7;F8VP89	0.97689
F8WDD7;P59998;F8WCF6;P59998-2;F8WE39;P59998-3;F8WDW3;F6TTL5;H7C0A3	0.82465	E9PH29;P30048	0.99465	O00139-2;O00139-1;E9PB70;O00139;O00139-4;D6R9M0	0.73368	P63208;E5RJR5;E7ERH2;F8W8N3;P63208-2;E5RGM3	0.73649	P19367-4;P19367-2;P19367;P19367-3;E7ENR4;Q2TB90;B1AR62;B1AR61;B1AR63;Q2TB90-3;Q2TB90-2;P52790	1.0149	E7EXA3;Q9GZT8-3;Q9GZT8-2;Q9GZT8	1.0479
F8WCR5;H7C2U6;Q9BPW8	NaN	E9PH64;Q9Y6M9;E7EWZ0;E9PF49	0.77599	Q8NBJ7-2;E9PBT8;Q8NBJ7;J3KQJ1;F8WEX5;E9PG02;Q8NBJ7-5;J3QT17;C9JL30;A8MXB9;Q8NBJ7-3;C9J660;F8WA42	0.68697	E7EM64;Q7L5N1;H7C3T0	1.0085	P55265-5;P55265;P55265-4;E7ENU4;P55265-3;H0YCK3;P55265-2	1.0409	Q8IY67-2;E9PAU2;Q8IY67;K7EKR9;Q8IY67-3	0.77619
Q9BVJ6-2;F8WD00;Q9BVJ6-3;Q5TAP6;Q9BVJ6	1.3606	Q13428-2;Q13428-8;Q13428;Q13428-3;Q13428-4;E9PHK9;J3KQ96;Q13428-6;Q13428-7;E7ETY2;H0YA99;Q13428-5	0.73934	E9PBY7;E9PQ61;O75152	0.71733	O14617-3;E7EMM2;O14617-4;O14617-2;G5E988;O14617;O14617-5	1.4104	E7EP00;G5EA31;P53992;B4DZT4	0.88584	F8VZJ2;H0YHX9;Q13765;Q13765-2;E9PAV3;F8W0W4;F8W1N5;F8VNW4;F8VZ58;Q9BZK3	1.0255
F8WEI3;F8WDT8;G3V0G3;H7C3E9;Q9NY93-2;Q9NY93	NaN	P28161-2;E9PHN6;P28161;F6XZQ7;E9PLF1;E9PHN7;E9PGV1;Q5T8Q9;P46439;Q5T8R1	0.85464	E9PG39;E9PC15;Q53H12	0.92197	E7EUI7;E7EMN6;Q6NXS1;P41236	0.88234	K7ENK8;K7EQW1;K7ELZ1;Q9UFG5;E7EP72;K7EK56;Q9UFG5-2	0.57867	Q9BRX5;E9PB21;Q9BRX5-2	1.1268
P09496-2;P09496-4;P09496-3;P09496;F8WF69	0.98517	E9PRB9;E9PL01;Q15005;E9PI68	1.1953	E9PC74;Q13144	1.6474	E7EMW7;J3KMW7;O95071	0.98765	E7EPB3;P50914	0.92534	O00139-2;O00139-1;E9PB70;O00139;O00139-4	0.82016
F8WF86;Q8TBC4-2;Q8TBC4	0.80102	E9PMC8;E9PIG5;O00212	0.89286	Q5TZP9;E9PC90;P14635	0.75649	H0Y6T7;E7ENA9;F6Y097;Q92542-2;Q92542;Q5T205;H0Y3Z4	0.99549	Q16181-2;E7ES33;E7EPK1;Q16181;B4DNE4;G3V1Q4;H0Y3Y4;H0YFF6;F5GZE5;Q5JXL7;Q6ZU15	0.91174	Q5SNT2-2;E9PBR6;Q5SNT2	0.94141
Q16630-3;F8WJN3;Q16630;Q16630-2	1.1019	E9PLA7;Q9UBU9-2;E9PIN3;Q9UBU9	1.1869	Q8IWS0-2;Q5JRC6;Q8IWS0;E9PC97;B4E0G4	1.1223	P19367-4;P19367-2;P19367;P19367-3;E7ENR4;B1AR63;E9PB90;Q2TB90;P52789;B1AR62;B1AR61;Q2TB90-3;Q2TB90-2;P52790	1.0522	Q9Y520-3;Q9Y520-4;E7EPN9;Q9Y520-5;Q9Y520;Q9Y520-7;Q9Y520-6;Q9Y520-2;H7C5N8	0.97601	E9PBY7;E9PQ61;O75152	0.57953
O75439;G3V0E4;F8WEA6;F8WBE1;F8WAZ6;E7ERZ4	2.9026	E9PIQ6;Q14181	NaN	E9PCI9;P14324	1.0262	P55265-5;P55265;P55265-4;E7ENU4;P55265-3;H0YCK3;P55265-2	0.98289	P19404;E7EPT4	1.0232	E9PG39;E9PC15;Q53H12	1.0409
G3V0E5;P02786;F5H6B1	1.0935	E9PIR3;Q9Y5J9	0.8374	Q14244-5;Q14244-3;Q14244-2;Q14244-4;F5H1E2;Q14244;E9PCP3	0.90878	E7EP00;G5EA31;P53992;B4DZT4	0.97222	E7EQ69;Q9GZZ1;Q9GZZ1-2;C9J5D1;B0AZT5;C9J5J3;F8WCK0;C9JZU6	0.88712	Q5TZP9;E9PC90;P14635	NaN
G3V126;Q9UI12-2;Q9UI12	1.1356	E9PK01;P29692;P29692-3;P29692-2;E9PRY8;E9PPR1;E9PL12;E9PQ49;E9PI39;E9PMW7;E9PL71;E9PQZ1;P29692-4;E9PN91;E9PIZ1;H0YCK7;E9PK06;E9PKK3;E9PK72;E9PNW6;E9PJD0;H0YE58;H0YE72;E9PQC9	0.96488	E9PD53;Q9NTJ3;Q9NTJ3-2;C9JR83;C9JVD8;C9J578;C9J9E4	1.051	K7ENK8;K7EQW1;K7ELZ1;Q9UFG5;E7EP72;K7EK56;Q9UFG5-2	0.7851	E7EQT4;Q9UKV3-5;Q9UKV3;G3V3B0;Q9UKV3-3;Q9UKV3-2;G3V3T3	0.95724	Q8IWS0-2;Q5JRC6;Q8IWS0;E9PC97;B4E0G4	0.81986
G3V153;Q14444-2;Q14444;E9PP31;E9PLA9	0.84851	E9PKG6;P80303-2;P80303;E9PJP3;H0YD18;E9PM22;E9PLR0;E9PLE9;J3KQU0	0.86637	E9PE17;Q9Y2R5;I3L0E3	1.2108	E7EPB3;P50914	0.95557	E7ES08;E7EQU1;O15347;E9PES6	0.9358	E9PCI9;P14324	0.90579
Q9BZZ5-2;G3V1C3;Q9BZZ5;E9PQK6;Q9BZZ5-3;Q9BZZ5-5;H0YER7;Q9BZZ5-1;B4E283	1.1391	E9PNX5;E9PKK8;E9PQ14;E9PPK9;Q9NY33-4;Q9NY33;G3V1D3;G3V180	1.7083	Q9UIA9;E9PEN8	3.108	Q9Y520-3;Q9Y520-4;E7EPN9;Q9Y520-5;Q9Y520;Q9Y520-7;Q9Y520-6;Q9Y520-2	0.86806	Q9BRR6-4;Q9BRR6-3;E7EQY8;Q9BRR6-2;Q9BRR6	0.75306	F5H801;Q02218-2;Q02218;E9PDF2;E9PCR7;C9J4G7;Q02218-3;E9PFG7	0.74007
G3V1U9;Q71U36;Q13748;F8VXZ4;Q13748-2;Q6PEY2;F8VWX4	1.0069	P17480-2;E9PKP7;P17480;E9PMM2	0.91499	E9PF10;O75694-2;O75694	0.99144	E9PJI4;E9PPA5;E9PKQ3;O14757-2;J3KN87;O14757-3;O14757;E7EPP6	NaN	Q9UI10-3;Q9UI10;Q9UI10-2;E7ERK9	0.78004	E9PCY4;P61962;B4E039	0.90841
G3V1X9;P45973	0.85848	E9PL22;Q9Y4L1;E9PJ21;B7Z909;J3KTF1;J3KSJ2;J3KT27;J3QQH7;J3QLE9;J3QL06	0.98483	E9PF19;Q9Y4P3	1.0121	P19404;E7EPT4	1.0319	H7C089;E7ES35;Q5R3I4	NaN	E9PD53;Q9NTJ3;Q9NTJ3-2;C9JR83;C9JVD8;C9J578;C9J9E4	0.9063
H0YJ40;G3V4X6;J3KMY7;Q9GZT3;G3V2S9;H0YJW7;H0YJ07;H0YJU7;H0YJI1	0.99777	E9PLK3;P55786;B7Z463;E5RJ24;E7EWZ2;A6NEC2;F5GZY4;H0YAQ6;H0YDG0;A6NEC2-2;H0YCQ5;E9PJ74;L7N488;E9PP11;E9PI82;E9PJY4;E9PPD4;A6NEC2-3;E9PRQ5	1.0553	O95394;E9PF86;D6RF12;J3KN95;H0Y8I3;D6RCQ8;D6RF77;D6RCD1;D6RC77;H0Y987	1.042	E7EWE1;E7EQ61;Q9GZZ9	1.1685	O95757;E7ES43;E9PDE8;D6RJ96	0.97627	P32929-2;E9PDV0;P32929	NaN
G3V5E4;G3V4W4;Q96EK6	1.0754	E9PLL6;P46776;E9PJD9;E9PLX7	1.0461	E9PFH8;P05455;E7ERC4;E9PGX9;E9PFL9	0.95481	E7EQ69;Q9GZZ1;Q9GZZ1-2;B0AZT5;C9J5D1	1.111	Q8WWY3-2;E7ESA8;E7EVX8;Q8WWY3;E7EU94;E7ESX0;Q8WWY3-3;E7EN72	1.1767	E9PE17;Q9Y2R5;I3L0E3	0.87646
G3V5P4;Q9Y281;F8WDN3	0.97687	E9PLQ8;E9PRB8	1.2841	Q04637-5;Q04637-4;Q04637-3;Q04637;E9PFM1;Q04637-6;C9JF13;C9J6B6	0.93945	F5GX39;E7EQ72;Q15363	0.98077	E7ESI2;P24941-2;P24941;G3V5T9	NaN	P50570-3;F5H4R9;E9PEQ4;P50570-2;K7ESI9;P50570;Q05193-5;Q05193-3;Q05193-4;Q05193-2;Q05193;E5RIK2;K7ELR1;Q6P2G1;E5RHK8;Q9UQ16-2;Q9UQ16-3;Q9UQ16;Q9UQ16-4	0.96097
P60900;G3V5Z7;G3V295;B4DXJ9;G3V3U4;G3V3I1;B4DQR4;G3V4S5;G3V2S7;H0YJC4	1.0185	E9PLX3;O43504	0.85109	Q14738-3;H0Y8C4;Q14738-2;E9PFR3;Q14738	0.78853	M0QZ54;M0R118;M0R0M7;Q15833-2;Q15833;E7EQD5	0.67237	Q9NWU5-2;Q9NWU5-3;Q9NWU5;E7ESL0;J3KQY1	1.6955	E9PF10;O75694-2;O75694	0.65139
G5E972;P42167;A2T926;P42167-2;P42166;H0YJH7	1.0743	E9PM04;H0YCN4;Q9BTE7	1.0099	Q96CW1-2;Q96CW1;E9PFW3;C9JJ47;C9JJD3;C9JPV8;C9JTK4;C9JGT8	1.2067	E7EQD9;O43795-2;E9PDF6;O43795	0.79949	E7EST3;E9PKV8;Q8N5M4;Q8WYY7	1.1157	E9PF19;Q9Y4P3	1.0469
Q12906;G5E9M5;Q12906-5;Q12906-4;Q12906-2;Q12906-6;Q12906-3;K7EQR9;Q96SI9-2;Q96SI9;K7ERM6;K7ENK6;K7EM82;K7ELV3;K7EJ09;K7ER69;K7EKJ9	1.0403	H0YCN7;H0YEK5;E9PMD2;J3KND1;Q96ER3;E9PRZ1	1.2309	E9PGM4;Q04446	1.3584	E7EQT4;Q9UKV3-5;Q9UKV3;G3V3B0;Q9UKV3-3;Q9UKV3-2;G3V3T3	0.97426	E7ESU4;Q9H0A0;E9PJN6;E9PMU0	1.0165	E9PF63;O75116;C9JFJ0;D6REE7;Q13464	1.5146
O75534-2;O75534;O75534-3;G5E9Q2;E9PLT0;E9PKN4;E9PLD4	1.3195	E9PMH2;E9PPD7;O00170	1.2576	E9PGT1;Q15631;H7C1D4;Q15631-2	1.0627	E7ES08;E7EQU1;O15347;E9PES6;P0C6E5	0.94448	Q13330-3;E7ESY4;Q13330;Q13330-2;H0Y4T7;F8VSM3;H0YIT0;E9PF88;C9JJM0;H0YIV8;F8W9Y9	1.4037	E9PFH8;P05455;E7ERC4;E9PGX9;E9PFL9	1.0099
G5EA52;P30101	0.98675	E9PMI6;J3KN38;P54105;E9PJF4	0.9429	E9PH05;F8W7Q4;Q96A26	1.3167	E9PCS8;E7EQY4;Q9BTC8-2;E7EV10;Q9BTC8;Q13330-2;D6W5A2;Q13330-3;E7ESY4;Q13330;H0YIT0;E9PF88	0.92322	O95299;E7ESZ7;Q8WXC9;Q8N1B9;C9J6X0	1.0154	Q04637-5;Q04637-4;Q04637-3;Q04637;E9PFM1;Q04637-6;E7EX73;E9PGM1;E7EUU4;D3DNT2;G5E9S1;C9JF13;C9J6B6;C9J2Z7;C9K073;H7C0V6;H7C044;F5H8J4;F5H564;Q504Z1;O43432;O43432-3;F8WCF2;C9JWH7;C9J556;C9JHW9;C9JSU8;C9JWW9	0.89337
P31943;G8JLB6;E9PCY7;H0YB39;E5RGV0;D6RIT2;D6RIU0;D6RBM0;E7EQJ0;D6RAM1;D6R9T0;D6RFM3;D6RDU3;D6RJ04;D6RIH9;H0YBG7;H0YBD7;F5GZT4;E7EN40;D6R9D3;D6RF17;D6RDL0;E5RGH4;E5RJ94;H0YAQ2	0.97789	E9PN17;O75964	0.9736	E9PH29;P30048	0.98756	Q9BRR6-4;Q9BRR6-3;E7EQY8;Q9BRR6-2;Q9BRR6	0.85933	P62847-2;E7ETK0;P62847-3;P62847;P62847-4	1.296	Q14738-3;Q14738-2;E9PFR3;Q14738;H0Y8C4	0.68933
O00429-4;O00429-5;O00429-3;G8JLD5;O00429-2;O00429;J3KPI2;O00429-6;B4DPZ9;F8W1W3;F8VUJ9;F8VZ52;F8VR28;F8VYL3;B4DDQ3;B4DGC9	0.92557	H0YEF3;Q8TDP1-2;Q8TDP1;E9PN81	1.3401	E9PHA2;Q15003;B4E189;C9J470;H7C415;C9JZP1	0.79885	Q9UI10-3;Q9UI10;Q9UI10-2;E7ERK9	0.73467	P60953;E7ETU3;P60953-1;Q5JYX0	0.88086	Q96CW1-2;Q96CW1;E9PFW3;C9JJ47;C9JJD3;C9JPV8;C9JTK4;C9JGT8	0.84596
Q9NVI7-3;H0Y2W2;Q9NVI7-2;Q5T9A4;Q9NVI7;Q5T2N8;Q5T9A4-3;Q5T9A4-2;Q5SV16	0.94705	E9PNQ1;P46977	1.0265	E9PHA6;P43246;P43246-2;C9J809	0.97154	O95757;E7ES43;E9PDE8;D6RJ96	0.91465	E9PF06;P09001;H0Y9G6;E7ETU7;D6RC14	1.1274	E9PGT1;Q15631;H7C1D4;Q15631-2	0.90147
H0Y362;Q8NEW0	NaN	E9PNT8;Q9Y6C9;E9PIE4	1.039	E9PHS0;O43813	1.4449	Q9NWU5-2;Q9NWU5-3;Q9NWU5;E7ESL0;J3KQY1	1.845	P50395;E7EU23;P50395-2;Q5SX87;Q5SX91;Q5SX90;Q5SX86	1.0109	E9PH29;P30048	0.94958
H0Y4R1;P12268;E7ETK5;C9K0R9;P20839-2;P20839-4;C9J381;P20839;E7EQS0;P20839-3;C9JV30;J3KNX8;A4D0Z6	0.99244	E9PPJ0;Q13435;H0YEX5;E9PJT3;E9PJ04;H0YCG1;E9PIL8;H0YDT7	1.0055	O43491-2;E9PII3;O43491-3;E9PK52;E9PPD9;E9PHY5;O43491;E9PPC9;E9PQD2;Q6ZSX4;Q6R5J7;E9PJP4;E9PQN0;J3KT37;E9PRG1;E9PIG0;H0Y5B0;Q9Y2J2-3;Q9Y2J2-2;F5GX05;Q9Y2J2	0.9578	E7EST3;E9PKV8;Q8N5M4;Q8WYY7	1.0802	E7EU96;P68400;Q8NEV1;P68400-2	0.9547	E9PHA2;Q15003;H7C415;C9JZP1;B4E189;C9J470	0.84576
H0Y653;H0YDU4;O00567	0.88179	E9PPW7;O00217;E9PN51;F8W9K7;E9PKH6	1.1178	E9PRB9;E9PL01;Q15005;E9PI68	0.87998	E7ESU4;Q9H0A0;E9PJN6;E9PMU0	0.98182	Q16851-2;Q16851;E7EUC7;C9JVG3;C9JQU9;C9JNZ1;C9JWG0;F2Z3H1;C9JTZ5;C9JUW1	0.93016	E9PI14;Q9NX20	1.3448
H0Y6Y5;Q13505-3;Q13505	0.63112	E9PQQ1;P08151-2;P08151	NaN	Q5BJD5-3;Q5BJD5-2;E9PJ42;Q5BJD5	0.71194	O95299;E7ESZ7;Q8WXC9;Q8N1B9;C9J6X0	0.84868	F5GYC1;P28288;E7EUE1;P28288-2	1.0133	E9PRB9;E9PL01;Q15005;E9PI68	NaN
P62158;H0Y7A7;E7ETZ0;E7EMB3;Q96HY3;M0QZ52;G3V361;F8WBR5;G3V226;G3V479;C9J7T9;P27482;P02585	1.0403	E9PQW4;P27361-3;P27361;E9PBK7;E9PJF0;P27361-2;B3KR49;H0YEX6;E9PRH7	0.92816	E9PK01;P29692;P29692-3;P29692-2;E9PRY8;E9PPR1;E9PL12;E9PQ49;E9PI39;E9PQZ1;P29692-4;E9PMW7;E9PL71;E9PN91;E9PIZ1;H0YCK7;E9PK06;E9PKK3;E9PK72;H0YE58;H0YE72;E9PNW6;E9PQC9;E9PJD0	0.98025	Q15154-2;E7ETA6;Q15154;A6NNN6;E7EV93;H0YBA1;E7EV56	0.6357	F8W0A9;E7EUE5;P05091;F8VXI5;F8VP50;H0Y2X5;P00352;P47895	0.99113	E9PIN3;Q9UBU9;E9PLA7;Q9UBU9-2	1.0457
O00410;H0Y8C6;O00410-3;O00410-2;B4E0R6;C9JMV5;E7ETV3;H0Y3V4;C9JZD8;C9J875;C9JQT6;E7ESA1;E7ESZ1;E7EWK4;E7EX05;E7EQT5;E7ETV8;E7EV12	1.0172	Q9NQP4;E9PQY2	0.45746	E9PKG6;P80303-2;P80303;E9PLR0;E9PLE9;J3KQU0;E9PJP3;E9PM22;H0YD18	0.90923	P62847-2;E7ETK0;P62847-3;P62847;P62847-4	1.1493	P27816-6;P27816;E7EVA0;P27816-2;P27816-5;B9ZVR1;H0Y2V1;F8W9U4;P27816-4;E9PGM5;B4DSQ1;H7C456;H7C4C5;B5MEG9;P27816-7	0.95018	Q5BJD5-3;Q5BJD5-2;E9PJ42;Q5BJD5	1.422
H0Y8E6;P49736	0.9128	E9PS41;Q6RFH5-2;Q6RFH5	2.135	E9PNX5;E9PKK8;E9PQ14;E9PPK9;Q9NY33-4;Q9NY33;G3V1D3;G3V180;Q9NY33-2	1.6639	P60953;E7ETU3;P60953-1;Q5JYX0	0.92124	Q9UM54-5;Q9UM54-2;Q9UM54-6;Q9UM54-4;Q9UM54-1;E7EW20;Q9UM54	0.85831	E9PK01;P29692;P29692-2;E9PRY8;P29692-3;E9PPR1;E9PL12;E9PQ49;E9PI39;E9PMW7;E9PIZ1;E9PL71;H0YCK7;E9PQZ1;P29692-4;E9PN91;E9PK06;E9PKK3;E9PK72;H0YE58;H0YE72;E9PNW6;E9PQC9;E9PJD0	1.0188
O43598;H0Y8X4;O43598-2	0.92223	F2Z2H2;Q15404-2;Q15404	0.923	P17480-2;E9PKP7;P17480;E9PMM2	0.97518	E9PF06;P09001;H0Y9G6;E7ETU7	1.094	E7EWK3;Q9H2U1-3;Q9H2U1-2;F5GZS0;Q9H2U1	1.0866	E9PKG6;P80303-2;P80303;H0YD18;E9PLR0;E9PLE9;J3KQU0	0.86412
H0Y9V9;P32969;D6RAN4;E7ESE0;H0Y9R4	1.1193	F2Z2K0;Q9UNZ2-4;Q9UNZ2;Q9UNZ2-5;J3QK90	NaN	E9PL22;Q9Y4L1;E9PJ21;B7Z909;J3KTF1;J3KT27;J3QQH7;J3QLE9;J3QL06;J3KSJ2	0.93374	E7ETU9;O00469;O00469-2	NaN	O43674-2;E7EWP0;O43674;H0Y886	1.0369	E9PNX5;E9PKK8;E9PQ14;E9PPK9;Q9NY33-4;Q9NY33;G3V1D3;G3V180;Q9NY33-2	0.99053
H0YB71;O94804;Q9H2G2-2;Q9H2G2	1.0924	F2Z2T0;Q3YEC7;Q3YEC7-2;G3V154;Q3YEC7-3;G8JLF3;Q3YEC7-4;Q3YEC7-5;Q3YEC7-6;B1AMX5	1.0258	E9PLK3;P55786;B7Z463;E5RJ24;E7EWZ2;A6NEC2;F5GZY4;H0YAQ6;H0YDG0;A6NEC2-2;E9PP11;H0YCQ5;E9PJY4;E9PJ74;E9PPD4;A6NEC2-3;L7N488;E9PI82;E9PRQ5	0.98624	Q13428-8;Q13428-7;E7ETY2;Q13428-3;Q13428-2;J3KQ96;Q13428-6;Q13428;Q13428-4;E9PHK9;Q13428-5;H0YA99	0.97838	P33240-2;P33240;E7EWR4;E9PID8;Q9H0L4	1.1246	P17480-2;E9PKP7;P17480	0.76671
H0YC04;P21281	1.208	F2Z356;Q9UKN8	0.85035	E9PLL6;P46776;E9PJD9;E9PLX7;E9PKT2;H0YF34	1.0207	E7ETZ4;Q9Y6E2;E9PFD4;C9JF98;F8WDX8;E7EMS9;Q75MG1	0.85633	P68036-2;P68036;E7EWS7	0.88475	E9PKW4;H3BRY5;P50226;P50225;E9PKR8;P50225-2;E9PM76;P50224;Q1ET66	0.63248
H0YDU8;P53041;A8MU39	0.64706	F5GWH5;P61165	0.95523	Q9BQB6-3;I3L3B4;F8W9H0;Q9BQB6-2;Q9BQB6;E9PLN8	0.94517	P50395;E7EU23;P50395-2;Q5SX87;Q5SX91;Q5SX90;Q5SX86	1.021	E9PH64;E7EWZ0;Q9Y6M9;E9PF49	0.98112	E9PL22;Q9Y4L1;E9PJ21;B7Z909;J3KTF1;J3QL06;J3KSJ2;J3KT27;J3QQH7;J3QLE9	0.86662
Q9Y223-5;Q9Y223-4;Q9Y223-3;H0YFA7;K4DID8;Q9Y223;Q9Y223-2	NaN	F5GWX5;Q14839;Q14839-2;Q8TDI0;Q5TG85;K7EMY3;Q12873-2;Q12873;E9PG89;F2Z2R5;I3L229;H7C3H7;H7C0J3	0.95035	E9PLQ8;E9PRB8	1.12	E7EU96;P68400;Q8NEV1;P68400-2	0.98231	P23588;E7EX17;B4DS13;F8VX11;F8W0K0;F8VRU1;F8VYE9;F8VSC7;F8VP89	0.94803	E9PLK3;P55786;B7Z463;E5RJ24;E7EWZ2;A6NEC2;F5GZY4;H0YDG0;E9PP11;H0YAQ6;A6NEC2-2;H0YCQ5;E9PJY4;E9PPD4;A6NEC2-3;E9PJ74;L7N488;E9PRQ5	1.0081
H0YGW7;Q8NE71-2;Q8NE71;Q5STZ7	1.042	F5H1S8;F5GX14;Q14165	1.0857	E9PLX3;O43504	0.96492	Q16851-2;Q16851;E7EUC7;C9JWG0;C9JVG3;C9JQU9;C9JNZ1;F2Z3H1;C9JTZ5;C9JUW1	0.96534	E7EX41;F5H5U2;Q8NHQ9	NaN	E9PLL6;P46776;E9PJD9;E9PLX7;E9PKT2;H0YF34	0.981
H0YHI8;O14974-5;O14974-2;O14974	1.487	P26358;F5GX68;P26358-2;P26358-3	1.1682	E9PM04;Q9BTE7;E9PLH8;E9PM78;H0YD80;E9PLS2;E9PQV9;H0YCN4	0.94925	F5GYC1;P28288;E7EUE1;P28288-2	1.053	Q05682-5;E9PGZ1;Q05682-4;F5H1Z9;E7EX44;Q05682-3;Q05682-6;Q05682-2;Q05682;C9J813;C9JE79;F8WE61;C9JEK3	0.86886	Q9BQB6-3;I3L3B4;F8W9H0;Q9BQB6-2;Q9BQB6;E9PLN8	1.1265
H0YI92;H0YIA8;Q9NUP9;O14910	NaN	F5GYQ2;F5GX77;J3KNG5;Q9UI30;M0R242	1.5797	E9PM92;O00193;E9PRZ9;E3W975;E9PQA1	1.0033	E7EUY0;P78527-2;P78527;H0YG84	1.0418	M0QX29;M0R259;Q9NP81;M0QWZ7;E7EX87;Q9NP81-2;M0R2C6	1.11	E9PRB8;E9PLQ8	1.5432
H0YKT4;H0YNG3;H0YK72;P67812;H0YK83	0.98584	F5GXT8;F5H796;Q9NR28-2;Q9NR28-3;Q9NR28	1.0565	H0YCN7;H0YEK5;E9PMD2;J3KND1;Q96ER3;E9PRZ1;E9PL53	1.0065	E7EV59;P21283	0.84515	E7EXA3;Q9GZT8-3;Q9GZT8-2;Q9GZT8	1.0588	E9PM04;H0YCN4;Q9BTE7	0.74026
P33316-2;H0YNW5;H0YKC5;P33316;H0YMM5;H0YNJ9;H0YKI0;H0Y477;H0YMP1	0.93127	F5H895;F5GXX5;P61803	0.87318	E9PMI6;J3KN38;P54105;E9PJF4	1.3332	P27816-6;P27816;E7EVA0;P27816-2;P27816-5;B9ZVR1;H0Y2V1;F8W9U4;P27816-4;E9PGM5;B4DSQ1;H7C4C5;H7C456;B5MEG9;P27816-7	0.96501	Q8IY67-2;E9PAU2;Q8IY67;K7EKR9;K7EKA4	0.89675	E9PMI6;J3KN38;P54105;E9PJF4	0.99317
P46779;P46779-2;P46779-3;H0YKD8;C9JB50;G5E9L2;H0YLP6;H0YMF4	1.0192	F5GYN4;Q96FW1;J3KR44;F5H6Q1;F5GYJ8;F5H3F0;Q96FW1-2	1.035	E9PN17;O75964	0.75422	E7EVD1;O43395;B4DSY9	1.0029	F8VZJ2;H0YHX9;Q13765;Q13765-2;E9PAV3;F8W0W4;F8W1N5;F8VNW4;F8VZ58;Q9BZK3	1.0806	H0YEF3;Q8TDP1-2;Q8TDP1;E9PN81	1.1123
H0YLA1;H3BQA8;H0YL19;H0YN81;Q9GZS3	1.1923	F5GZ27;K7EJE8;K7EKE6;Q8N8K8;P36776;K7ER27;K7ER56;K7ERR6	1.0074	E9PN51;F8W9K7;E9PPW7;O00217;E9PKH6	1.0933	E7EVX8;Q8WWY3;Q8WWY3-2;E7ESA8;E7EU94;E7ESX0;Q8WWY3-3;E7EN72	0.94534	E9PPY4;Q5T3I0-2;F2Z3C6;E9PAV9;Q5T3I0;Q5T3I0-3	0.85039	E9PPG9;P78406;E9PQ57;B0QZ37;B0QZ36	0.87888
H0YMZ1;H0YL69;P25789;H0YMI6;H0YMA1;H0YN18;H0YLS6;H0YLC2;H0YKT8;P25789-2;H0YKS0	0.87331	F5GZJ1;Q15021;E7EN77	1.3546	H0YEF3;Q8TDP1-2;Q8TDP1;E9PN81;E9PKP0;H0YE52;H0YCP5	1.0613	Q9UM54-6;E7EW20;Q9UM54-5;Q9UM54-2;Q9UM54-4;Q9UM54-1;Q9UM54	0.81471	H7C5W6;E9PB09;Q86XA9-2;Q86XA9;F5H619	1.2258	E9PPW7;O00217;E9PN51;F8W9K7;E9PKH6	0.99609
H0YM70;Q9UL46	1.1014	P08195-2;P08195-3;F5GZS6;P08195;J3KPF3;P08195-4;H0YFS2;F5H867;F5H0E2;F5GZI0;F5GZR9;H0YFX4	0.90365	E9PPG9;P78406;E9PQ57;B0QZ37;B0QZ36	0.93357	E9PID8;P33240-2;P33240;E7EWR4;Q9H0L4	1.2903	E9PLU0;E9PRI6;E9PB14;O00330	0.91917	E9PQW4;P27361-3;P27361;E9PJF0;P27361-2;E9PBK7;B3KR49;H0YEX6;E9PRH7;H0YDH9;K7ELV1;K7EN18;P31152;Q16659	0.97457
H0YN42;P07355;H0YMD0;H0YMU9;P07355-2;H0YKS4;H0YM50;A6NMY6;H0YMM1;H0YNP5;H0YKL9;H0YKZ7;H0YLV6;H0YMT9;H0YKX9;H0YN28;H0YL33;H0YKV8;H0YMW4;H0YMD9;H0YNA0;H0YNB8;H0YN52;H0YKN4;H0YLE2	1.015	F5H7F0;Q8NB66;F5H090	0.82731	E9PQW4;P27361-3;P27361;E9PBK7;E9PJF0;P27361-2;B3KR49;H0YEX6;E9PRH7;H0YDH9;K7ELV1;K7EN18;P31152;Q16659	1.2299	P68036-2;P68036;E7EWS7	0.87004	Q9BRX5;E9PB21;Q9BRX5-2	1.0291	Q9NQP4;E9PQY2	0.75465
Q92841;H3BLZ8;Q92841-1;Q92841-3;Q92841-2;C9JMU5;G5E9L5	0.99581	F5H0L8;Q9Y6Y8-2;Q9Y6Y8	NaN	E9PS41;Q6RFH5-2;Q6RFH5;H0YFP2;H0YGM6	0.74013	E9PH64;E7EWZ0;Q9Y6M9;E9PF49	0.83256	O00139-2;O00139-1;E9PB70;O00139;O00139-4;D6R9M0	1.4788	P62861;E9PR30	1.0904
H3BV80;Q15287-3;Q15287-2;H3BMM9;H3BTC0;Q15287;H3BR57;H3BPG5;H3BMS0	0.93765	F5H0M0;Q15067-3;Q15067-2;Q15067;K7ENF1;K7ESC7	1.162	F2Z2T0;Q3YEC7;Q3YEC7-2;Q3YEC7-3;Q3YEC7-4;Q3YEC7-5;Q3YEC7-6;G3V154;G8JLF3;B1AMX5	0.90067	P23588;E7EX17;B4DS13;F8VX11;F8W0K0;F8VRU1;F8VYE9;F8VSC7;F8VP89	1.0411	E9PB90;P52789	NaN	F2Z2H2;Q15404-2;Q15404	0.75633
Q86WV2;H3BN72;H3BNV9;P13073;H3BNI5;H3BPG0	0.83336	H0YI98;F5H223;Q13561;Q13561-3;Q13561-2;F5H2S7;F8WAG8	0.92063	F2Z356;Q9UKN8	1.0364	E7EX41;F5H5U2;Q8NHQ9	0.40203	Q5SNT2-2;E9PBR6;Q5SNT2	0.95533	Q9UNZ2-6;F2Z2K0;Q9UNZ2;Q9UNZ2-5;J3QK90;Q9UNZ2-4	0.73191
H3BV04;H3BN93;H3BUB6;H3BPL9;O15127	2.2134	Q1M185;Q1M188;Q1M186;F5H2U8;Q1M187;P52926-2;P52926;F5H2A4;F5H6H0	0.71855	F5GWH5;P61165	1.0345	Q05682-5;E9PGZ1;Q05682-4;F5H1Z9;E7EX44;Q05682-3;Q05682-6;Q05682-2;Q05682;C9J813	0.96405	Q8NBJ7-2;E9PBT8;Q8NBJ7;J3KQJ1;F8WEX5;E9PG02;Q8NBJ7-5;J3QT17;C9JL30;A8MXB9;Q8NBJ7-3;C9J660;F8WA42	0.64867	F2Z2T0;Q3YEC7;Q3YEC7-2;Q3YEC7-3;Q3YEC7-4;Q3YEC7-5;Q3YEC7-6;G3V154;G8JLF3;B1AMX5	1.5096
H3BNW0;Q9NXG2	1.0619	P11586;G3V2B8;F5H2F4;G3V3L6	0.99029	Q96B13;Q13362-2;Q13362-3;Q13362;Q13362-4;H0YJ75;F5GWP3;H0YJ35;G3V2U3	1.19	M0QX29;M0R259;Q9NP81;M0QWZ7;E7EX87;Q9NP81-2;M0R2C6	1.2273	E9PBY7;E9PQ61;O75152	0.77619	F5GWH5;P61165	0.91564
P20674;H3BNX8;H3BRM5;H3BV69;H3BRI0	0.90778	F5H2J1;Q8WXR4-6;Q8WXR4-3;Q8WXR4-5;Q8WXR4-2;Q8WXR4-4;Q8WXR4;Q8WXR4-7;Q8NEV4	1.0176	F5GWX2;Q9NRV9;H0YG71	0.91294	Q8IY67-2;E9PAU2;Q8IY67;K7EKR9;Q8IY67-3	0.86226	E9PG39;E9PC15;Q53H12	1.0105	F5GWX2;Q9NRV9;H0YG71	1.4693
H3BNY7;H3BQX5;P50224-2;H3BRY5;P50225;P50224;Q1ET66	0.47322	H0YEC8;H0YDJ3;F5H2U2;Q13523	0.76073	F5GWX5;Q14839;Q14839-2;Q8TDI0;Q12873-2;Q12873;E9PG89;K7EMY3;Q5TG85;F2Z2R5;I3L229;H7C3H7;H7C0J3	1.0473	F8VZJ2;H0YHX9;Q13765;Q13765-2;E9PAV3;F8W0W4;F8W1N5;F8VNW4;F8VZ58;Q9BZK3	1.042	E9PC50;Q6Y7W6-4;Q6Y7W6;Q6Y7W6-3;I1E4Y6;C9JHW1;E7ESB6	1.0758	F5GWX5;Q14839;Q14839-2;Q8TDI0;Q5TG85;K7EMY3;Q12873-2;Q12873;E9PG89;I3L229;H7C3H7;H7C0J3;F2Z2R5	1.1519
Q96DC0;P42126-2;H3BP91;P42126;H3BS70	0.86746	G3V1P4;G5EA58;F5H345;P08397-2;P08397	0.85031	F5GX19;F5H3Y3;Q6IAA8	0.93862	E9PPY4;Q5T3I0-2;F2Z3C6;E9PAV9;Q5T3I0;Q5T3I0-3	1.134	Q8IWS0-2;Q5JRC6;Q8IWS0;E9PC97;B4E0G4	0.96778	F5GX19;F5H3Y3;Q6IAA8	0.95516
P35637-2;P35637;H3BPE7	0.96683	F5H365;Q15436;F5H6C4;G3V531;B3KXI2;G3V5X8;G3V4Q2;G3V4V1;G3V1W4;G3V3G5;G3V2R6;G3V5K1;G3V299;Q5QPE2;Q15437	0.95668	P26358;F5GX68;P26358-2;P26358-3;K7EMU8;K7EJL0	0.94301	E9PLU0;E9PRI6;E9PB14;O00330	0.74518	E9PCI9;P14324	0.96563	F5H5V4;F5GX23;F8W7V8;O00233-2;J3KN29;O00233;F5H7X1;F5H169;F5H182	0.8084
H3BPF6;Q99471;Q99471-2;H3BMQ1;Q99471-3	0.95306	P05023-3;P05023;F5H3A1;P05023-2;M0R116;P13637;F5H6J6;B7Z2T0;B1AKY9;P50993;H0Y7C1;P20648;P54707;P54707-2;Q5TC01;Q5TC02;M0QXF2	1.1114	F5GYQ2;F5GX77;Q9UI30;J3KNG5;M0R242	1.0196	Q9BRX5;E9PB21;Q9BRX5-2	0.8282	F5H801;Q02218-2;Q02218;E9PDF2;E9PCR7;Q02218-3;E9PFG7;C9J4G7;Q9ULD0-3;Q9ULD0-2;Q9ULD0	1.0179	F5GX33;Q9UJS0;Q9UJS0-2;B3KR64;O75746	1.0698
H3BQQ2;Q86UK7-2;Q86UK7-3;Q86UK7	1.3902	F5H5A9;Q9Y2Z0-2;Q9Y2Z0	1.1051	F5GXX5;P61803;F5H895	0.95733	O00139-2;O00139-1;E9PB70;O00139;O00139-4;D6R9M0;Q8N4N8	0.90476	E9PD53;Q9NTJ3;Q9NTJ3-2;C9JR83;C9JVD8;C9J578;C9J9E4	1.1392	P26358;F5GX68;P26358-2;K7EMU8;K7EJL0	0.7269
H3BQZ7;Q1KMD3	0.69302	Q5T8N1;F5H5C2;Q8WUM0	1.0093	F5GYN4;Q96FW1;J3KR44;F5H6Q1;F5GYJ8;F5H3F0;Q96FW1-2	1.0302	Q5SNT2-2;E9PBR6;Q5SNT2	1.0775	E9PDD5;P51553;G5E9Q7;E7EQB8;E9PF84;H7C1R3;H7C1W2;H0Y5Q7	0.97202	F5GX77;J3KNG5;Q9UI30;F5GYQ2;M0R242	0.95097
H3BQZ9;P07741;P07741-2;H3BSW3;H3BQF1;H3BQB1	0.86253	Q9BQE3;F5H5D3;F8VVB9;F8VRZ4;F8VS66;A6NHL2-2;A6NHL2;F8VX09;F8VWV9;C9JEV8;C9JQ00;C9JJQ8;C9K0S6;F8VRK0;C9JDL2;F8VXZ7;F8VS94;F8VYI2;F8VXB8;F8W0F6;Q9H853	1.0155	Q9Y639-3;Q9Y639-1;Q9UFM8;Q9Y639-4;H7BXJ1;Q9Y639-5;F5GZD0;Q9Y639	1.2112	Q8NBJ7-2;E9PBT8;Q8NBJ7;J3KQJ1;F8WEX5;E9PG02;Q8NBJ7-5;J3QT17;C9JL30;A8MXB9;Q8NBJ7-3;C9J660;F8WA42	0.6626	Q96J85;E9PDG5;Q71RC2-2;Q71RC2-5;Q71RC2-3;Q71RC2;Q71RC2-4;G3XAA8;Q92615	1.4353	F5GXW5;Q99622	0.56128
H3BRG4;P22695;H3BSJ9;H3BP04;H3BUE4;H3BUI9	1.0394	Q12849-5;F5H5I6;H0Y8R1;H0YAK1;Q12849;H0YAM1	1.0574	H0Y390;Q9UPN3-4;F5GZL7;Q9UPN3-3;Q9UPN3-2;F8W8Q1;Q9UPN3-5;Q9UPN3;H3BPE1;H3BQK9;H0YD69	1.0446	E9PBY7;E9PQ61;O75152	0.86532	P32929-2;E9PDV0;P32929	1.0292	F5H895;F5GXX5;P61803	0.7493
H3BRV9;P61970;J3QS01	1.0434	F5H5M8;Q9BXF9	0.25671	P08195-2;P08195-3;F5GZS6;P08195;J3KPF3;P08195-4;F5GZI0;H0YFS2;F5H867;H0YFX4;F5H0E2	0.9219	E9PC15;Q53H12;E9PG39	0.90781	E9PE17;Q9Y2R5;I3L0E3	0.97761	F5GYN4;Q96FW1;J3KR44;F5H6Q1;F5GYJ8;F5H3F0;Q96FW1-2	1.0032
H3BTQ7;Q9Y5N6	0.83504	F5H5Y3;G3V1U4;Q9UHB9-2;Q9UHB9;Q9UHB9-3	1.1128	G3V582;F8W7D6;Q9NQX3;Q9NQX3-2;F5H039;G3V4D2;G3V4R0;G3V355	0.80156	Q5TZP9;E9PC90;P14635;H0YA62	0.73104	Q9UIA9;E9PEN8;E7ESC6;H0YBE1	1.0438	F5GZ49;F5H0U5;Q9NZD2	0.97022
Q8WWM7-6;Q8WWM7-8;Q8WWM7-5;Q8WWM7-4;Q8WWM7-2;Q63ZY4;H3BUF6;Q8WWM7;Q8WWM7-3;H3BRB0	1.001	H3BNH3;H3BR91;Q15572-2;F5H647;Q15572-6;Q15572	1.0194	F5H0B0;P55327-2;P55327-4;P55327;D0UFD3;C9J502;D0UFD1;P55327-3;E5RFR7;H0YC44;D0UFD5;E5RK35;H0YC42;H0YAT2	1.1302	Q8IWS0-2;Q5JRC6;Q8IWS0;E9PC97;B4E0G4	1.0525	E9PEZ3;O60610;H9KV28;E7ERW8;O60610-2;B9ZVX0;E9PHQ0;O60610-3;E7ET75;E7EMV0;B4E2I7;E5RJ79	1.0165	Q9Y639-3;Q9Y639-1;Q9UFM8;Q9Y639-4;H7BXJ1;Q9Y639-5;F5GZD0;Q9Y639	NaN
H3BV16;Q96II6;O96000;H3BPJ9	1.2865	H7BYW1;F5H668;H0YGL6;P20340-2;P20340;C9JB90;F5GXN4;C9JU14;J3KR73;F5GZB1;B7Z337;Q9NRW1;Q14964	1.0934	F5H0L8;Q9Y6Y8-2;Q9Y6Y8	1.2394	E9PCI9;P14324	0.97268	E9PF10;O75694;O75694-2;D6RA13	1.0155	H0Y390;Q9UPN3-4;F5GZL7;Q9UPN3-3;Q9UPN3-2;F8W8Q1;Q9UPN3-5;Q9UPN3;H3BPE1;H3BQK9;H0YD69	NaN
Q7L2E3-3;H7BXY3;Q7L2E3;Q7L2E3-2	0.65519	F5H6D0;Q13724;C9J8D4	0.84988	Q15286-2;F5H157;Q15286	5.5879	Q14244-5;Q14244-3;Q14244-2;Q14244-4;F5H1E2;Q14244;E9PCP3	1.1578	E9PF19;Q9Y4P3	0.81167	P08195-2;P08195-3;F5GZS6;P08195;J3KPF3;P08195-4;H0YFS2;F5GZI0;F5H867;F5H0E2;H0YFX4	0.90246
P22061;P22061-2;J3KP72;H7BY58;B7Z972;F8WDT3;F8WAV5;F8WAX2;H7C4X2;C9J0F2	0.95501	P61769;F5H6I0	1.0691	F5H1S8;Q14165;H0YG07;F5GX14	0.87032	Q9Y4E8-2;Q9Y4E8-3;E9PCQ3;Q9Y4E8	NaN	O95394;E9PF86;D6RCQ8;D6RF77;D6RF12;D6RCD1;H0Y8I3;D6RC77;J3KN95	0.90635	F5H643;F8W898;Q9H9Y6-2;Q9H9Y6;F5GZX4	1.1131
P17096;P17096-3;H7BYM6	NaN	F5H6N1;Q96A72;F5H3U9;F5H6P7;F5H124;A6NEC0	1.6372	F5H1S9;G8JLB3;Q9Y606-2;Q9Y606;F5H168;F5GY32;F8W9U5;F5H1B2;F5GXL3	0.88401	F5H801;Q02218-2;Q02218;E9PDF2;E9PCR7;Q02218-3;C9J4G7;E9PFG7;Q9ULD0-3;Q9ULD0-2;Q9ULD0	0.80348	E9PFH8;P05455;E7ERC4;E9PFL9;E9PGX9	1.0563	F5H0M0;Q15067-3;Q15067-2;Q15067;K7ENF1;K7ESC7	0.98759
H7BZJ3	0.90126	F5H6T1;P61160;P61160-2	0.77837	F5H223;Q13561;Q13561-3;Q13561-2;F5H2S7;F8WAG8;F8W1I6;H0YHL1;H0YI98;F8VX93;F8VRV7;F8VW18	0.92342	E9PCY5;Q02880-2;Q02880	0.96476	Q04637-5;Q04637-4;Q04637-3;Q04637;E9PFM1;Q04637-6;C9JF13;C9J6B6;H7C044;H7C0V6;F8WCF2;REV__C9JBJ8;C9JHW9;REV__Q8NEG2;REV__F5H7J8;REV__C9JQZ6;REV__J3KQX6	0.92012	Q15286-2;F5H157;Q15286	1.4031
P61956-2;P61956;H7BZT4;Q6EEV6;P55854;A8MUA9;B4DUW4;A8MU27	1.1616	F5H721;Q9Y2W2	0.63919	Q1M185;Q1M188;Q1M186;F5H2U8;Q1M187;P52926-2;P52926;F5H2A4;F5H6H0	0.7517	E9PD53;Q9NTJ3;Q9NTJ3-2;C9JR83;C9JVD8;C9J578;C9J9E4;C9JWF0;C9IYK2;C9JJ64	0.95964	Q14738-3;Q14738-2;E9PFR3;Q14738;H0Y8C4;H0YJ35;H0YJU0	0.93705	F5H1G8;Q14344	0.74873
H7C0Q6;Q9C037-3;Q9C037-2;Q9C037	1.1405	O95197-3;O95197-4;F5H774;O95197-2;O95197	1.2836	P11586;G3V2B8;F5H2F4;G3V3L6	1.0123	E9PDV0;P32929;P32929-2	0.87463	Q96CW1-2;Q96CW1;E9PFW3;C9JJ47;C9JJD3;C9JPV8;C9JTK4;C9JGT8	1.0296	F5H1S8;Q14165;H0YG07;F5GX14	0.79593
H7C125;P61019-2;P61019	0.73554	F5H7E2;P42285	1.0605	F5H2U2;Q13523;H0YEC8;H0YDJ3	1.0837	E9PE17;Q9Y2R5;I3L0E3	1.0868	O60502-2;E9PGF9;O60502;H7C3X0;O60502-3	0.89635	F5H223;Q13561;Q13561-3;Q13561-2;F5H2S7;F8WAG8;H0YI98;F8W1I6;H0YHL1;F8VW18;F8VX93;F8VRV7	0.97027
H7C159;H7C3A1;Q9BXP5-5;Q9BXP5-4;Q9BXP5-2;Q9BXP5-3;Q9BXP5	1.1111	Q4G177;F5H826;Q5JPE7-2;Q15155;P69849;Q5JPE7;J3KN36	0.93108	G3V1P4;G5EA58;F5H345;P08397-2;P08397	0.96379	E9PE51;Q9BW83-2;Q9BW83	1.3833	E9PGM4;Q04446	1.3791	Q1M185;Q1M188;Q1M186;F5H2U8;Q1M187;P52926-2;P52926;F5H2A4;F5H6H0	0.52499
H7C2G3;P30042-2;H7C1F6;P30042	0.68839	F5H897;Q12931;I3L0K7;I3L239;I3L2D5	1.0567	F5H365;Q15436;F5H6C4;B3KXI2;G3V531;G3V5X8;G3V4Q2;G3V4V1;G3V1W4;G3V3G5;G3V2R6;G3V5K1;G3V299	1.0534	Q9NQV8-2;E9PEH0;Q9NQV8	0.90841	E9PGT1;Q15631;H7C1D4;Q15631-2	0.99792	P11586;G3V2B8;F5H2F4;G3V3L6	0.98334
H7C4E3;Q8N766-4;Q8N766-3;Q8N766-2;Q8N766	0.70019	M0QYS5;F5H8D7;P18887;M0QZ96;M0R0D2;M0R1U8	0.91808	P05023;F5H3A1;P05023-3;P05023-2;M0R116;P13637;F5H6J6;B7Z2T0;B1AKY9;P50993;H0Y7C1;Q5TC01;Q5TC02;M0QXF2	0.97879	Q9UIA9;E9PEN8;E7ESC6	1.0982	Q99627-2;E9PGT6;Q99627;H7C3S9;B8ZZP3	0.94843	F5H2T0;O95163	1.0335
I3L276;I3L4P8;I3L463;I3L159;I3L1F5;P30519;I3L430	2.0387	Q99733;F5HFY4;C9J6D1;C9JZI7;E9PNW0;E9PJJ2;E9PS34;E9PNJ7;A8MXH2;E9PKT8;E9PKI2;E9PP22;H0YCI4;C9J1B1	0.97476	Q96JB5;F5H3I5;J3QL95;J3KRI2;J3KRK4;J3KS63;J3QS62;J3QRM1;J3QQY1;Q96JB5-3;Q96JB5-2	0.74595	E9PEQ6;Q9UNP9;E9PKY5;Q9UNP9-2;Q9UNP9-3	0.81063	E9PH29;P30048	0.95578	G3V1P4;G5EA58;F5H345;P08397-2;P08397	0.7999
I3L1L3;Q9BQG0;Q9BQG0-2;I3L2H8	1.4255	O60341;O60341-2;F6S0T5	1.2769	F5H459;Q92572	0.96343	E9PEW0;Q9P275;Q9P275-2	1.2873	E9PH73;O95461-2;O95461	1.422	F5H365;Q15436;B3KXI2;F5H6C4;G3V531;G3V5X8;G3V4Q2;G3V4V1;G3V1W4;G3V3G5;G3V2R6	1.1011
I3L1P8;Q02978;F5GY65	1.056	F6SBX2;Q9NSE4	0.71112	F5H4J2;O75381-2;O75381	1.1296	E9PF10;O75694;O75694-2;D6RA13	1.0171	E9PHA2;Q15003;H7C415;C9JZP1;B4E189;C9J470	0.91601	P05023-3;P05023;F5H3A1;P05023-2;M0R116;P13637;F5H6J6;B7Z2T0;B1AKY9;P50993;H0Y7C1;Q13733;Q5TC01;E9PRA5;P20648;P54707;P54707-2;Q5TC02;Q5TC05;M0QXF2	0.97386
I3L397;P63241;P63241-2;I3L504;F8WCJ1;C9J7B5;C9J4W5;Q9GZV4;Q6IS14	1.0624	F6TTL5;F8WDD7;P59998;F8WCF6;P59998-3;P59998-2	0.3562	F5H5A9;Q9Y2Z0-2;Q9Y2Z0	1.2411	E9PF19;Q9Y4P3	0.93134	E9PHS0;O43813	NaN	F5H5A9;Q9Y2Z0-2;Q9Y2Z0	1.1849
P35613-2;I3L4S8;P35613;I3L192;P35613-3;P35613-4	0.91316	F8VPD4;P27708;H7BZB3;H7C2E4;H7C3Z5;P31327-2;P31327;J3KQL0	1.0211	Q5T8N1;F5H5C2;Q8WUM0	0.99487	E9PFH8;P05455;E7ERC4;E9PGX9;E9PFL9	0.99583	E9PHV4;O15514	NaN	Q5T8N1;F5H5C2;Q8WUM0	0.79781
I3L505;O14561	2.6611	Q13838;Q13838-2;F8VQ10;Q5STU3;B4DP52;F6WLT2;F6S4E6;F6UN21;F6TRA5;F6UJC5;B4DIJ6;H0Y400;F6QYI9;F6R6M7;H0YCC6	1.0454	Q12849-5;F5H5I6;H0Y8R1;H0YAK1;Q12849;H0YAM1	0.85604	Q04637-5;Q04637-4;Q04637-3;Q04637;E9PFM1;Q04637-6;C9JF13;C9J6B6;H7C0V6;H7C044;F8WCF2;C9JWH7;C9J556;REV__C9JBJ8;C9JHW9;C9JSU8;C9JWW9;REV__Q8NEG2;REV__F5H7J8;REV__C9JQZ6;REV__J3KQX6	1.0015	E9PL01;Q15005;E9PI68;E9PRB9	0.92506	Q12849-5;F5H5I6;H0Y8R1;H0YAK1;Q12849;H0YAM1	0.81854
J3KN55;Q96EY8	2.6364	F8VR84;F8VQQ3;Q9HB07;H3BPH3	1.2849	F5H5Y3;G3V1U4;Q9UHB9;Q9UHB9-2;Q9UHB9-3	1.0498	Q14738-3;H0Y8C4;Q14738-2;E9PFR3;Q14738	1.065	E9PI70;E9PIP0;E9PRL3;E9PPH0;E9PPA0;Q9BWS9-3;Q9BWS9;Q9BWS9-2;J3KNL3	2.1097	F5H5K6;Q9BVI4	0.79663
O15027-2;O15027-4;O15027-3;O15027;O15027-5;J3KNL6	0.96831	F8VQR7;Q16527;F8VW96	3.2431	F5H668;H0YGL6;P20340-2;P20340;H7BYW1;C9JU14;J3KR73;F5GZB1;B7Z337;Q9NRW1;C9JB90;F5H3K7;F5GXN4;P20340-3;Q14964	0.98438	Q96CW1-2;Q96CW1;E9PFW3;C9JJ47;C9JJD3;C9JPV8;C9JTK4;C9JGT8	1.2738	E9PI88;O60547	0.74485	F5H5Y3;Q9UHB9;G3V1U4;Q9UHB9-2;Q9UHB9-3	1.2798
J3KNT0;Q16658;C9JPH9;C9JFC0;H7BYX5	1.0153	F8VXI1;F8VQS7;F8VRD8;Q9UI09	0.80898	F5H669;Q8N684-2;Q8N684;Q8N684-3;J3QT54;F5H6M0;F5H047;C9J286;C9J323	1.3129	O60502-2;E9PGF9;O60502;O60502-3;H7C3X0	1.0027	Q5T6K7;E9PI99;E9PIG7;Q13952-6;Q5T6K5;Q13952-7;Q13952-2;Q13952-5;Q13952-3;Q13952	0.89056	F5H668;H0YGL6;P20340-2;P20340;H7BYW1;C9JB90;F5H3K7;F5GXN4;C9JU14;P20340-3;J3KR73;F5GZB1;B7Z337;Q9NRW1;Q14964	0.9262
J3KPV4;P33991;E5RG31;E7ER43;E5RK04;E5RHP5	0.90859	F8VRL4;F8VRR0;Q9NZJ9-3;Q96G61;Q8NFP7;Q9NZJ9;Q9NZJ9-2	0.80474	F5H6D0;Q13724;C9J8D4	0.91744	E9PGT1;Q15631;H7C1D4;Q15631-2	1.0672	E9PIN3;Q9UBU9;E9PLA7;Q9UBU9-2	1.0851	F5H669;Q8N684-2;Q8N684;Q8N684-3;J3QT54;F5H6M0;F5H047	0.45092
Q9NTK5;J3KQ32;Q9NTK5-2;Q9NTK5-3;C9JCJ9;C9JTK6	1.1125	P09651-3;F8VXY0;F8VRQ1;P09651-2;F8W6I7;P09651;F8VSB5;F8W1S7;F8VZ49;F8W646;F8VTQ5;Q32P51;J3KQA8;F8VYN5;H0YH80	1.076	O00159-2;F5H6E2;O00159-3;O00159	0.97002	E9PGY2;H0Y650;Q86Y56;Q86Y56-3;Q86Y56-2	0.84464	Q5BJD5-3;Q5BJD5-2;E9PJ42;Q5BJD5	1.1505	F5H6C0;Q9BZK7;Q9BQ87;O60907-2;O60907	1.4064
Q9Y3E5;J3KQ48	0.99454	Q12792-4;F8VS81;Q12792;Q12792-3	1.3974	P61769;F5H6I0;H0YLF3	1.0634	E9PH05;F8W7Q4;Q96A26	0.92175	Q5VU43-3;Q5VU43;Q5VU43-4;E9PJ64;F8WAP3	0.80629	F5H6D0;Q13724;C9J8D4	0.81031
P15170-2;J3KQG6;H3BR35;P15170;Q8IYD1;H3BSV8	0.95176	F8VUA2;F8VVT7;Q9HD42;F5H875	0.94831	F5H6N1;Q96A72;F5H3U9;F5H6P7;A6NEC0;F5H124	1.2781	E9PH29;P30048	0.98156	J3KP84;E9PPG7;E9PRU6;F2Z2D6;Q9NTX5-5;E9PJS8;E9PLY6;H0Y5L2;Q9NTX5-6;Q9NTX5-2;Q9NTX5	1.1934	Q9BSC4-2;F5H6G7;Q9BSC4-4;Q9BSC4	0.28273
Q96C36;J3KR12	0.80769	F8W651;P61923;F8VVA7;F8VXB1;F8VUC5;F8W156;F8VS17;F8VYZ4;F8VWL5;F8VYK5;F8VXR1;B4DDX8	1.1543	F5H721;Q9Y2W2	0.79493	E9PHA2;Q15003;C9JZP1;C9J470;H7C415;B4E189	1.1379	E9PK01;P29692;P29692-2;E9PRY8;P29692-3;E9PQ49;E9PI39;E9PPR1;E9PL12;E9PL71;E9PQZ1;P29692-4;E9PMW7;E9PIZ1;H0YCK7;E9PN91;E9PK06;E9PKK3;E9PK72;H0YE58;H0YE72;E9PNW6;E9PQC9;E9PJD0	1.0115	P61769;F5H6I0	1.0367
J3KR24;P41252;Q5TCC4;Q5TCC5;Q5TCD2;Q5TCD1	0.96106	F8VVM2;Q00325-2;Q00325;F8VWQ0;F8VZL5;F8VWR4	1.0009	H0YKH0;H0YLW9;H0YLI3;F5H7D6;H0YNT2;Q04726-2;F8W964;Q04726-3;F8W8S3;Q6PI57;Q04726-5;Q04726-4;Q04726;H0YKT5;H0YKN8;H0YL70	1.848	E9PHA6;P43246;P43246-2;C9J809	1.0483	E9PKG6;P80303-2;P80303;E9PLR0;E9PLE9;J3KQU0;E9PJP3;H0YD18;E9PM22	0.97181	F5H6N1;Q96A72;F5H3U9;F5H124;F5H6P7;A6NEC0	0.84649
J3KSM3;J3KRR2;J3QKR3;P49720	0.98665	Q9UBQ0;Q9UBQ0-2;H3BLV8;F8VXU5	0.99386	F5H7E2;P42285	0.92501	E9PHS0;O43813;F8WDS9	0.81584	E9PKK4;G3V1A9;P42695	0.84151	F5H6T1;P61160;P61160-2	1.0944
J3QQT2;J3KRX5;P18621;J3QL51;P18621-2;J3QLC8;J3QS96;J3KRB3;J3KSJ0	0.92113	F8VYE8;P36873;F8W0W8;P36873-2;P62136-2;F8VR82;A6NNR3;P62140;E7ETD8;C9JP48;C9J9S3;B4DNE3;F8W0V8;H0Y3Y6;F8WE71;F5H1L6;F5H037	1.1371	F5H897;Q12931;I3L0K7;I3L239;I3L2D5	1.0374	E9PHV4;O15514	0.86536	P17480-2;E9PKP7;P17480;E9PMM2;E9PLT2	0.95528	F5H6V2;Q96G03;H0Y921;B4E0G8	0.82314
J3KS22;Q7Z4W1;J3QS36;J3QS45;J3KRZ4;J3KSZ5;J3QL34	1.0185	F8VZY9;P05783;CON__P05784;C9JM50;CON__H-INV:HIT000015463;P08727;CON__P08727;CON__P19001	0.95403	Q99733;F5HFY4;C9J6D1;C9JZI7;E9PNW0;E9PJJ2;E9PS34;E9PNJ7;A8MXH2;E9PKT8;E9PKI2;E9PP22;H0YCI4;C9J1B1	0.8408	E9PI14;Q9NX20	0.97605	E9PKW4;H3BRY5;P50226;P50225;E9PKR8;P50225-2;E9PM76;P50224;Q1ET66	0.80359	F5H721;Q9Y2W2	1.048
J3QQY2;J3KS45;Q9UM00-2;Q9UM00;J9JIE6	0.85103	P54819-2;F8W1A4;P54819;P54819-3;P54819-5;F8VZG5;F8VY04;P54819-6;P54819-4;G3V213;F8VPP1	1.1583	F6RFD5;P60981;P60981-2	1.2146	E9PL01;Q15005;E9PI68;E9PRB9;H0YE04	1.0079	E9PL22;Q9Y4L1;E9PJ21;B7Z909;J3KTF1;J3QL06;J3QQH7;J3QLE9;J3KT27;J3KSJ2	0.86868	F5H7B0;Q15477	0.99814
J3KT73;J3QL01;P63173;J3KSP2	0.97881	F8W6E4;P43304-2;P43304;F5GYK7	1.5255	O60341;O60341-2;F6S0T5	0.98891	E9PLA7;Q9UBU9-2;E9PIN3;Q9UBU9	1.0017	E9PLK3;P55786;B7Z463;E5RJ24;E7EWZ2;A6NEC2;F5GZY4;H0YAQ6;H0YDG0;A6NEC2-2;H0YCQ5;E9PJ74;L7N488;E9PRQ5;E9PP11;E9PI82;E9PJY4;E9PPD4;A6NEC2-3	1.007	F5H897;Q12931;I3L0K7;I3L239;I3L2D5	0.99167
P17844;J3KTA4;B4DLW8;J3KRZ1;J3QRQ7;J3QSF1;J3QR02;J3KRX8;J3QRN5	1.0396	Q9UHY1;F8W6G1	1.1689	F6SBX2;Q9NSE4	1.1651	Q5BJD5-3;Q5BJD5-2;E9PJ42;Q5BJD5	NaN	Q9BQB6-3;I3L3B4;F8W9H0;Q9BQB6-2;Q9BQB6;E9PLN8	1.1231	M0QYS5;F5H8D7;P18887;M0QZ96;M0R0D2;M0R1U8	0.85026
J3QR09;J3KTE4;P84098;J3QL15	1.0455	P35580;P35580-2;F8W6L6;P35580-3;P35580-4;E7ERA5	1.0766	F8VPD4;P27708;H7BZB3;H7C2E4;H7C3Z5	1.0183	E9PJ81;E9PRQ7;Q04323;Q04323-2;E9PS08	NaN	E9PLQ8;E9PRB8	0.95167	Q99733;F5HFY4;C9J6D1;C9JZI7;E9PNW0;E9PJJ2;E9PS34;E9PNJ7;A8MXH2;E9PKT8;E9PKI2;E9PP22;H0YCI4;C9J1B1	0.79976
J3KTF8;P52565;J3QQX2;J3KRE2;J3KS60;A8MXW0;J3KRY1	0.91767	F8W720;P49915	1.0012	Q13838;Q13838-2;F8VQ10;Q5STU3;F6WLT2;B4DP52;F6UN21;F6TRA5;F6S4E6;F6UJC5;B4DIJ6;H0Y400;F6R6M7;H0YCC6;F6QYI9;F6QWI5;F6U6E2;K7EN69;F6S2B7;E7EMX2;K7ENP6;K7EL56;K7EIL8;F6SXL5;K7EN25	1.0485	E9PK01;P29692;P29692-2;E9PRY8;E9PPR1;E9PL12;E9PQ49;E9PI39;E9PMW7;E9PQZ1;P29692-4;E9PIZ1;H0YCK7;E9PK06;E9PKK3;E9PK72;E9PNW6;E9PJD0;H0YE58;H0YE72;E9PQC9	1.0025	E9PM04;H0YCN4;Q9BTE7	1.137	F6RFD5;P60981;P60981-2	1.1243
Q07955;J3KTL2;J3KSR8;Q07955-3;Q07955-2;J3QQV5;J3KSW7	1.0629	Q14157-4;Q14157-1;Q14157-3;F8W726;Q14157;Q14157-5;Q5VU77;Q5VU81;Q5VU80;Q5VU79;Q5VU78	1.1252	F8VQR7;Q16527;F8VW96	1.1448	E9PKG6;P80303-2;P80303;J3KQU0;E9PLR0;E9PLE9;E9PJP3;E9PM22;H0YD18;H0YEG8	0.96014	E9PM92;O00193;E9PRZ9;E3W975;E9PQA1	1.0193	O60341;O60341-2;F6S0T5	1.4271
J3QRG6;P42771;P42771-4;K7ES20;P42771-2;K7ENC6;P42771-3;G3XAG3;P42772	0.9837	F8W733;Q9NXR7-4;Q9NXR7-3;Q9NXR7;Q9NXR7-1;C9J2G0	15.751	P09651-3;F8VXY0;F8VRQ1;P09651-2;F8W6I7;P09651;F8VSB5;F8W1S7;F8VZ49;F8VTQ5;Q32P51;F8W646;J3KQA8;H0YH80;F8VYN5	1.0847	E9PKK4;G3V1A9;P42695	NaN	E9PMI6;J3KN38;P54105;E9PJF4	1.1019	F6SBX2;Q9NSE4	0.91325
P19105;O14950;J3QRS3;J3KTJ1;P24844-2;P24844	1.0646	F8W7H5;Q5VYM1-3;Q5VYM1-2;Q5VYM1	1.0886	F8VRX4;Q8TDD1;Q8TDD1-2	2.0543	E9PLH9;E9PP14;E9PKL9;Q13630;E9PP60;H0YE90	0.89139	E9PN17;O75964	0.98243	F8VPD4;P27708;H7C2E4;H7BZB3;H7C3Z5;P31327-2;P31327;J3KQL0	1.0076
J3QRZ5;P54578;A6NJA2;B7Z4N8;J3QQT6;J3KS55;H0YA47	0.96508	F8W8K5;Q9UMY4-2;Q9UMY4	1.1458	Q12792-4;F8VS81;Q12792;Q12792-3;H0Y858	0.87578	P17480-2;E9PKP7;P17480;E9PMM2	0.88619	E9PN51;F8W9K7;E9PPW7;O00217;E9PKH6	1.1417	Q13838;Q13838-2;F8VQ10;Q5STU3;B4DP52;F6WLT2;F6UN21;F6TRA5;F6UJC5;F6S4E6;B4DIJ6;H0Y400;H0YCC6;F6QYI9;K7EPJ3;F6R6M7;K7EN69;K7ENP6;F6QWI5;K7EL56;K7EIL8;F6U6E2;F6S2B7;F6SXL5;E7EMX2;K7EN25	1.1046
J3QSV6;O76021;I3L3C4;B4DJ58;I3L3U9	0.96915	F8W914;Q9NQC3-2;Q9NQC3-5;Q9NQC3;Q9NQC3-3;H7C106;Q9NQC3-4;F8WAM4;Q9NQC3-6	0.77505	F8VSC5;Q6P3W7;F8VPW3;H0YIK6	0.80719	E9PL22;Q9Y4L1;E9PJ21;B7Z909;J3KTF1;J3QL06;J3KSJ2;J3KT27;J3QQH7;J3QLE9	0.89598	E9PN57;H0YEK1;G3V1B8;H0YEB6;O60232	1.0814	F8VQQ3;Q9HB07;F8VR84	1.0457
J3QT28;O43684-2;O43684;B4DDM6;J3QSX4	1.0439	F8W9U3;Q96IU4;Q96IU4-2;B4DQI4	0.96579	F8VTY2;Q8NFH4	3.4995	E9PLK3;P55786;B7Z463;E5RJ24;E7EWZ2;A6NEC2;F5GZY4;H0YAQ6;H0YDG0;E9PP11;A6NEC2-2;H0YCQ5;E9PJY4;E9PJ74;E9PPD4;A6NEC2-3;L7N488;E9PRQ5;E9PJF9;E9PPZ2	0.98828	H0YEF3;Q8TDP1-2;Q8TDP1;E9PN81;E9PKP0;H0YE52;H0YCP5	1.2752	F8VQR7;Q16527;F8VW96	1.5771
Q03252;J9JID7	1.097	F8WA86;Q15417;B4DFK6;K7ES69;E9PDU6;Q99439-2;B4DDF4;Q99439;B4DUT8	1.3222	F8VUA2;F8VVT7;Q9HD42	0.96834	E9PLL6;P46776;E9PJD9;E9PLX7;E9PKT2;H0YF34	1.0055	E9PNW4;P13987;E9PR17	1.0083	F8VXI1;F8VQS7;F8VRD8;Q9UI09	0.97228
Q13620-3;Q13620-1;K4DI93;Q13620;A6NE76;Q13619-2;Q13619	0.6037	Q5T378;Q5T376;F8WAN4;Q9P2Q2	0.072214	F8VUY8;Q96QD8	1.8406	Q9BQB6-3;I3L3B4;F8W9H0;Q9BQB6-2;Q9BQB6;E9PLN8	0.94946	E9PNW8;Q8WVX9	1.0574	P09651-3;F8VXY0;F8VRQ1;P09651-2;F8W6I7;P09651;F8VSB5;F8W1S7;F8VZ49;F8VTQ5;Q32P51;F8W646;J3KQA8;H0YH80;F8VYN5	1.1313
K7EJC1;K7EJR3;P48556	0.99583	F8WBH7;O95456-2;O95456	1.0142	P61923;F8VVA7;F8VXB1;F8VUC5;F8W156;F8W651;F8VS17;F8VYZ4;F8VWL5;F8VXR1;F8VYK5;B4DHZ0;B4DDX8	1.0488	E9PLQ8;E9PRB8	1.1333	E9PPG9;P78406;E9PQ57;B0QZ37;B0QZ36	0.97642	F8VRX4;Q8TDD1;Q8TDD1-2	NaN
K7EKS1;P36954	NaN	F8WCZ0;Q9Y316-2;Q9Y316;Q5R2V8	7.6317	F8VVM2;Q00325-2;Q00325;F8VWQ0;F8VZL5;F8VWR4	1.0184	E9PM04;Q9BTE7;E9PLH8;E9PM78;H0YD80;E9PLS2;E9PQV9;H0YCN4	1.0097	E9PQW4;P27361-3;P27361;P27361-2;E9PJF0;B3KR49;E9PBK7;H0YEX6;E9PRH7;H0YDH9;K7ELV1;K7EN18;P31152;Q16659	0.95228	Q12792-4;F8VS81;Q12792;Q12792-3	0.77764
K7EQJ5;K7EM56;P62841;K7ELC2;K7EJ78	0.99547	Q9BVJ6-2;F8WD00;Q9BVJ6-3;Q5TAP6;Q9BVJ6	2.2202	Q9UBQ0;Q9UBQ0-2;H3BLV8;F8VXU5	0.96913	E9PM92;O00193;E9PRZ9;E3W975;E9PQA1	1.0412	Q9NQP4;E9PQY2	1.0221	F8VUA2;F8VVT7;Q9HD42	1.0454
P14314-2;P14314;K7ELL7;K7EKX1;K7EJ70;K7EPW7	1.0606	F8WDT8;G3V0G3;H7C3E9;Q9NY93-2;Q9NY93;F8WEI3	0.77852	F8VYE8;P36873;F8W0W8;P36873-2;F8VR82	0.93794	H0YCN7;H0YEK5;E9PMD2;J3KND1;Q96ER3;E9PRZ1;E9PL53	1.1828	E9PR16;G3V198;Q12769;E9PSI3;Q12769-3	0.91084	P61923;F8VVA7;F8VXB1;F8VUC5;F8W156;F8W651;F8VS17;F8VYZ4;F8VWL5;F8VXR1;F8VYK5;B4DHZ0;B4DDX8	1.0659
P41567;K7EM18;O60739	1.0638	F8WEI7;P09382	1.3764	P54819-2;F8W1A4;P54819;P54819-3;F8VZG5;P54819-6;P54819-5;P54819-4;F8VY04;G3V213;F8VPP1	0.98757	E9PMI6;J3KN38;P54105;E9PJF4	0.94716	P62861;E9PR30	1.0364	Q9UBQ0;Q9UBQ0-2;H3BLV8;F8VXU5	0.92635
K7EN45;Q13526	1.0752	Q16630-3;F8WJN3;Q16630;Q16630-2	1.1081	F8W6E4;P43304-2;P43304;F5GYK7	1.653	E9PN17;O75964	1.0011	E9PRR7;Q14331	0.92012	P54819-2;F8W1A4;P54819;P54819-3;P54819-5;F8VZG5;F8VY04;P54819-6;P54819-4;G3V213;F8VPP1	0.96876
K7ENA8;O75821;K7ER90;K7EL20;K7EP16;K7EL60	1.0313	G3V0E5;P02786;F5H6B1	1.1764	Q9UHY1;F8W6G1;C9JHZ6	0.86357	E9PN51;F8W9K7;E9PPW7;O00217;E9PKH6	1.1286	H0YFP2;E9PS41;Q6RFH5-2;Q6RFH5	0.93717	Q07866-8;G3V2E7;Q07866-2;Q07866-3;Q07866;F8W6L3;Q07866-7;G3V3H3;Q07866-5;Q07866-10;Q07866-6;G3V5R9;Q07866-4;Q07866-9;G5E9S8;E7EVH7;H0YGB8;H0YJU9;H0YJL0;G3V2P7;H0YJT3;H0YG16	1.256
K7ENG2;P26368-2;P26368	1.0257	Q9BZZ5-2;G3V1C3;Q9BZZ5;Q9BZZ5-3;Q9BZZ5-5;E9PQK6;Q9BZZ5-1;B4E283;H0YER7	1.141	G5E9S8;Q07866-8;G3V2E7;Q07866-2;Q07866-3;Q07866;F8W6L3;Q07866-7;G3V3H3;Q07866-5;Q07866-10;Q07866-6;G3V5R9;Q07866-4;Q07866-9;E7EVH7;H0YGB8;H0YJU9;G3V2P7;H0YJL0;H0YJT3;H0YG16;A8MZ87	1.0079	H0YEF3;Q8TDP1-2;Q8TDP1;E9PN81	1.2107	F2Z2H2;Q15404-2;Q15404	1.0343	P35580;P35580-2;F8W6L6;P35580-3;P35580-4	0.9344
K7EPL2;Q9UBT2;B3KWB9;K7ES38	1.1805	G3V1K0;K7ER96;O43396	2.4125	P35580;P35580-2;F8W6L6;P35580-3;P35580-4;E7ERA5;P12883;P13535;Q9Y623;P12882;P11055;Q9UKX2;A7E2Y1	1.056	E9PND2;E9PP21;P21291	NaN	F2Z2T0;Q3YEC7;Q3YEC7-2;Q3YEC7-3;Q3YEC7-4;Q3YEC7-5;Q3YEC7-6;G3V154;G8JLF3;B1AMX5	1.0491	F8W7Q4;Q96A26;E9PH05	0.95924
K7EPT6;Q92804-2;Q92804	1.1222	Q9NQZ6-2;Q9NQZ6-4;Q9NQZ6-3;G3V1L3;Q9NQZ6	0.34718	F8W6R3;P43897;P43897-2	1.0594	E9PNR6;H0YE29;Q07960	0.79001	F2Z376;H7C4K7;Q5SRE5-2;Q5SRE5	0.59221	F8W8K5;Q9UMY4-2;Q9UMY4	0.69569
K7EQ02;Q96EP5-2;Q96EP5;K7EJ88	1.0703	G3V1U9;Q71U36;F8VXZ4;Q13748;Q13748-2;Q6PEY2;F8VQQ4;F8VWX4	0.95297	F8W733;Q9NXR7-4;Q9NXR7-3;Q9NXR7;Q9NXR7-1;C9J2G0	0.83424	E9PNW4;P13987;E9PR17	1.0975	I3L4H1;Q00169;F5GWE5;I3L3W1;I3L2X8;I3L471;I3L4C0;I3L4U7;I3L459	1.0665	F8W914;Q9NQC3-2;Q9NQC3-5;Q9NQC3;Q9NQC3-3;H7C106;Q9NQC3-4;F8WAM4;Q9NQC3-6	0.76163
K7EQA9;Q16543;K7EIU0;K7EL68;K7EKQ2	1.0019	G3V1V0;F8W1R7;P60660-2;P60660;J3KND3;G8JLA2;B7Z6Z4;F8VPF3;F8VZV5;G3V1Y7;F8VZU9;F8W180;H0YI43;F8W1I5;P14649;F8VXL3	0.99129	F8W7F7;Q7Z7H5-3;Q7Z7H5;Q7Z7H5-2	0.79021	E9PNW8;Q8WVX9	NaN	F5GWH5;P61165	0.93749	O43663-3;F8W9B5;O43663-2;H9KV59;O43663;H0YL53	0.65557
M0QX71;Q9BQ67	1.3926	G3V1X9;P45973	0.81996	F8W840;Q9BYJ9;Q7Z739	1.1942	E9PPG9;P78406;E9PQ57;B0QZ36;B0QZ37	0.89878	Q96B13;Q13362-2;Q13362-3;Q13362;Q13362-4;H0YJ75;F5GWP3;H0YN84;G3V2U3	0.8539	F8W9U3;Q96IU4;Q96IU4-2;B4DQI4	1.132
M0QXC3;M0R2Z3;M0R303;M0R2D2;M0R1Y4;M0R003;Q3ZCQ8;Q3ZCQ8-2;M0R047	0.91996	Q13404;Q13404-7;Q13404-2;Q13404-1;G3V2F7;Q13404-8;J3KNL8;Q13404-6;Q15819;G3V113;E5RGE2;H0YBP9;D6RG00;H0YBX6	0.95488	F8W8K5;Q9UMY4-2;Q9UMY4	0.81831	E9PPI9;Q9NPD3	NaN	H3BUB0;H3BM75;F5GWS3;Q6P9B6	NaN	F8WA86;Q15417;B4DFK6;E9PDU6	1.0571
M0QXF7;Q969H8;M0QYN0	1.3078	G3V2Q1;G3V4C1	1.1605	F8W914;Q9NQC3-2;Q9NQC3-5;Q9NQC3;Q9NQC3-3;H7C106;Q9NQC3-4;F8WAM4;Q9NQC3-6	0.65425	E9PPY3;O43159	0.61032	F5GWX2;Q9NRV9;H0YG71	0.89232	F8WAH1;Q9UDR5	1.3886
P14866-2;M0QXS5;P14866;M0QYT0;M0R076;H7C464;M0R1W6;Q5JB52;B7WPG3;Q8WVV9-4;Q8WVV9;D6W592	0.96925	G3V4X8;Q13573;G3V3A4;G3V5R3	1.1905	O43663-3;F8W9B5;O43663-2;H9KV59;O43663;H0YL53	1.0064	E9PQ14;Q9NY33-4;Q9NY33;G3V1D3;G3V180;E9PNX5;E9PKK8;E9PPK9;Q9NY33-2	NaN	F5GWX5;Q14839;Q14839-2;Q8TDI0;Q5TG85;K7EMY3;Q12873-2;Q12873;E9PG89;F2Z2R5;I3L229;H7C3H7;F5H6N4;H7C0J3	1.0544	F8WBH7;O95456-2;O95456	1.0859
M0R0F0;P46782;M0R0R2;M0QZN2	1.0644	G3V4F7;P61011-2;P61011	0.8123	F8W9U3;Q96IU4;Q96IU4-2;B4DQI4	1.2233	E9PQW4;P27361-3;P27361;E9PJF0;P27361-2;E9PBK7;B3KR49;H0YEX6;E9PRH7;H0YDH9;K7ELV1;K7EN18;P31152;Q16659	1.0396	F5GX19;F5H3Y3;Q6IAA8	1.0685	F8WBJ6;Q9NRX1	0.82539
M0R192;P30043;M0QZL1	NaN	M0QYG8;M0R1D2;M0R0C1;M0QYJ8;P60983;O60234;G3V4P8	1.2056	F8WA86;Q15417;B4DFK6;E9PDU6	0.78244	Q9NQP4;E9PQY2	1.1482	F5GX39;Q15363;E7EQ72	NaN	P59998;F8WCF6;P59998-3;F6TTL5;F8WDD7;H7C0A3;P59998-2	0.96164
M0R210;P62249;M0R3H0;M0QX76;M0R1M5;Q6IPX4	1.2666	G3V5E4;G3V4W4;Q96EK6	0.96863	F8WAK8;Q8N3U4;Q8N3U4-2	0.85187	E9PR16;G3V198;Q12769	0.84999	P26358;F5GX68;P26358-2;P26358-3;K7EMU8;K7EJL0;K7ENW7	0.98617	Q14257;F8WCY5;H0YL43;A8MXP8	0.75487
M0R221;M0R2B8;P09012;M0R0G9;M0QXK2;M0QZG7;M0R268;P08579	1.1231	G3V5P4;Q9Y281;F8WDN3	1.0115	J3QRU4;P63027;F8WCA0;L7N2F9;K7ENK9;K7EKX0	1.733	P62861;E9PR30	0.98657	F5GYQ2;F5GX77;Q9UI30;J3KNG5;M0R242	0.97257	F8WD00;Q9BVJ6-3;Q9BVJ6;Q9BVJ6-2;Q5TAP6	1.3172
M0R3C3;Q9NZ01-2;Q9NZ01	1.0139	P60900;G3V5Z7;G3V295;G3V3I1;B4DXJ9;G3V3U4;B4DQR4;G3V4S5;G3V2S7;H0YJC4	0.93171	P59998;F8WCF6;P59998-3;F8WDD7;H7C0A3;P59998-2;F6TTL5;F8WE39	0.4348	E9PRR7;Q14331	0.75658	F5H7R9;P20962;F5GXR3	NaN	F8WEI3;F8WDT8;G3V0G3;Q9NY93-2;Q9NY93;H7C3E9	1.4687
O00116	1.1021	G5E972;P42167;P42167-2;H0YJH7	1.1182	Q14257;F8WCY5;H0YL43;A8MXP8	1.0498	E9PRT4;Q4G0F5	0.91039	F5GXV0;F5H2Q5;O95425-2;O95425	NaN	F8WEI7;P09382	0.7762
O00148;B1Q2N1;Q8N5M0;K7EQN7;K7EPJ3;K7ENP6;F6QWI5;K7EL56;K7EIL8;F6U6E2;K7EN69;F6S2B7;F6SXL5;E7EMX2;K7EN25	5.0293	Q9BQ52-4;G5E9D5;Q9BQ52;H7C2I4;Q9BQ52-2;E7ES68;H7C3Y9;Q9BQ52-3	2.1507	F8WD00;Q9BVJ6-3;Q9BVJ6;Q9BVJ6-2;Q5TAP6	1.0569	E9PRZ0;J3QR49;P46734-2;P46734;P46734-3	NaN	F5H895;F5GXX5;P61803	0.91582	Q16630-3;F8WJN3;Q16630;Q16630-2	0.89446
O00231;O00231-2;J3QRY4	1.0195	Q12906;G5E9M5;Q12906-5;Q12906-4;Q12906-2;Q12906-6;Q12906-3;K7EQR9;K7EKJ9;K7ERM6;K7ENK6;K7EM82;K7ELV3;K7EJ09;K7ER69;Q96SI9-2;Q96SI9	1.0308	F8WDI0;Q9NT62-2;Q9NT62	1.1028	F2Z2H2;Q15404-2;Q15404	1.1042	F5GYN4;Q96FW1;J3KR44;F5H6Q1;F5GYJ8;F5H3F0;Q96FW1-2	1.0237	G3V126;Q9UI12-2;Q9UI12	0.77522
O00232;O00232-2	1.0437	O75534-2;O75534;O75534-3;G5E9Q2;E9PLT0;E9PLD4;E9PNG3	0.9615	F8WDT8;G3V0G3;Q9NY93-2;Q9NY93;F8WEI3;H7C3E9	0.88345	F2Z2T0;Q3YEC7;Q3YEC7-2;G3V154;Q3YEC7-3;G8JLF3;Q3YEC7-4;Q3YEC7-5;Q3YEC7-6;B1AMX5	0.9822	J3QL14;F8WEN9;P61421;F5GYQ1	1.0191	Q9BZZ5-2;G3V1C3;Q9BZZ5;Q9BZZ5-3;Q9BZZ5-5;Q9BZZ5-1;B4E283;E9PQK6;H0YER7	0.95576
O00264;B7Z1L3	1.0547	H7C5F2;Q9H3I1;H7C5H3;G5E9W7;G5E9V5;P82650	0.78495	F8WEI7;P09382	0.85788	Q8IZ69-2;Q8IZ69;F2Z2W7	0.86984	Q9Y639-3;Q9Y639-1;Q9UFM8;Q9Y639-4;H7BXJ1;Q9Y639-5;F5GZD0;Q9Y639	1.4409	G3V1K0;K7ER96;O43396	NaN
O00273-2;O00273	0.75878	G5E9W3;Q9UKF6	0.9282	Q16630-3;F8WJN3;Q16630;Q16630-2	1.02	F2Z376;H7C4K7;Q5SRE5-2;Q5SRE5	NaN	H0Y390;Q9UPN3-4;F5GZL7;Q9UPN3-3;Q9UPN3-2;F8W8Q1;Q9UPN3-5;Q9UPN3;H3BPE1;H3BQK9	1.1487	Q15165-3;J3QT77;Q15165-1;Q15165;G3V1K3	0.4607
O00299	0.97019	G5E9Z2;Q96KA5-2;Q96KA5	0.6513	G3V126;Q9UI12-2;Q9UI12	0.846	F5GWH5;P61165	NaN	P08195-2;P08195-3;F5GZS6;P08195;J3KPF3;P08195-4;H0YFS2;F5H867;F5H0E2;F5GZI0;F5GZR9;H0YFX4	0.91893	O15226;G3V1N1	0.64036
O00422;H7BZW6	0.93437	Q92879-5;Q92879-2;Q92879-3;Q92879;Q92879-4;G5EA30;E9PQK4;E9PSH0;E9PKU1	NaN	H0YH02;G3V167;Q9UGN5-2;Q9UGN5	0.99483	Q96B13;Q13362-2;Q13362-3;Q13362;Q13362-4;H0YJ75;F5GWP3;H0YN84;G3V2U3	1.0607	F5H643;F8W898;Q9H9Y6-2;Q9H9Y6;F5GZX4	1.0898	G3V1X9;P45973;F8VNY3	0.91293
O00442;O00442-2	NaN	G5EA52;P30101	0.9836	G3V198;Q12769;E9PR16	0.82167	F5GWX2;Q9NRV9;H0YG71	0.74559	F5H0B0;P55327-2;P55327-4;P55327;D0UFD3;C9J502;D0UFD1;P55327-3;E5RFR7;H0YC44;D0UFD5;E5RK35;H0YC42;H0YAT2	0.94985	G3V337;Q9NYT0	0.24593
O00487	1.2758	P31943;G8JLB6;E9PCY7;D6RBM0;D6RIT2;D6RIU0;E7EQJ0;D6RAM1;E5RGV0;D6R9T0;D6RFM3;E7EN40;D6RDU3;D6RJ04;D6RIH9;H0YB39;D6RDL0;H0YBD7;D6RF17;H0YBG7;D6R9D3;E5RGH4;F5GZT4;E5RJ94;H0YAQ2	1.0382	Q9BZZ5-2;G3V1C3;Q9BZZ5;Q9BZZ5-3;Q9BZZ5-5;Q9BZZ5-1;B4E283;H0YER7;E9PQK6	1.0146	F5GWX5;Q14839;Q14839-2;Q8TDI0;K7EMY3;Q12873-2;Q12873;E9PG89;Q5TG85;F2Z2R5;F6T542;I3L229;H7C3H7;H7C0J3;F5H6N4	1.0802	F5H0L8;Q9Y6Y8-2;Q9Y6Y8	NaN	Q13573;G3V3A4;G3V4X8;G3V5R3	0.83699
O00571-2;O00571;B4DXX7;O15523;B4E132;C9J8G5;C9J081;B4E3C4	1.0048	H0Y4R4;Q5JTV8;J3KN66	0.95165	Q15165-3;J3QT77;Q15165-1;Q15165;G3V1K3	1.1934	F5GX19;F5H3Y3;Q6IAA8	0.95536	F5H0M0;Q15067-3;Q15067-2;Q15067;K7ENF1;K7ESC7	1.2048	G3V4C1	1.1446
O14654	0.88427	Q969Q0;P83881;H7BZ11;H0Y5B4;J3KQN4	0.93498	O15226;G3V1N1	1.3395	F5H5V4;F5GX23;F8W7V8;O00233-2;J3KN29;O00233;F5H7X1;F5H169;F5H182	0.77281	Q15286-2;F5H157;Q15286	NaN	G3V5E4;G3V4W4;Q96EK6	1.2593
O14737;B4DE64;K7EQA1;K7EL31;K7ESJ4;Q3HM38;K7EPG2	0.92376	H0Y612;Q9UPN9-2;Q9UPN9	0.96826	G3V1X9;P45973;F8VNY3	0.84908	P26358;F5GX68;P26358-2;P26358-3;K7EMU8;K7EJL0;K7ENW7	0.97303	F5H1S8;Q14165;H0YG07;F5GX14	0.99747	H0YJ95;G3V4Z6;Q01650;Q9UM01;Q92536	1.1127
O14744-2;O14744;G3V580;G3V2L6;C9JSX3;A8MTP3;B4DX49;G3V5W5;G3V5L5;G3V2X6;H0YJX6;B4DV00	0.89753	H0Y6J1;Q99549;Q99549-2	1.0751	G3V5I6;Q6PJT7-4;Q6PJT7-3;G3V256;H0YJA2;Q6PJT7-5;Q6PJT7-9;Q6PJT7-2;Q6PJT7;G3V3Y4	0.80181	F5GX77;Q9UI30;F5GYQ2;J3KNG5;M0R242	1.0158	F5H1S9;G8JLB3;Q9Y606-2;Q9Y606;F5GXL3;F5H168;F5GY32;F8W9U5;F5H1B2	0.89381	P56378;G3V5Q3;G3V556	0.93631
O14818;O14818-2;H0Y586;Q5JXJ2;Q8TAA3-2;Q8TAA3-5;Q8TAA3;F5GY34	1.1623	H0Y6Y5;Q13505-3;Q13505	0.92575	Q13404;Q13404-7;Q13404-2;Q13404-1;G3V2F7;Q13404-8;J3KNL8;Q13404-6;D6RG00;E5RGE2	1.036	F5GXE0;H0YGE9;F5GXU0;F5H883;P20645	1.127	F5H223;Q13561;Q13561-3;Q13561-2;F5H2S7;F8WAG8;F8W1I6;H0YI98;H0YHL1;F8VW18;F8VX93;F8VRV7	0.9766	G3V5P4;Q9Y281;F8WDN3	0.90243
O14828-2;O14828	1.2604	P62158;H0Y7A7;E7ETZ0;E7EMB3;Q96HY3;M0QZ52;G3V361;F8WBR5;G3V226;G3V479;C9J7T9;P27482;P02585	1.0355	H0YJ40;G3V4X6;J3KMY7;Q9GZT3;G3V2S9;H0YJW7;H0YJ07;H0YJU7;H0YJI1	0.99024	F5GXM3;H3BQF7;H3BMU1;H3BUI0;P53990-2;P53990-3;P53990;P53990-4;H3BQ38;E9PF00;H3BPP6;H3BRE2;J3KR23;A8KAH5	NaN	Q1M185;Q1M188;Q1M186;F5H2U8;Q1M187;P52926-2;P52926;F5H2A4;F5H6H0	0.75689	P60900;G3V5Z7;G3V295;B4DXJ9;G3V3I1;G3V3U4;B4DQR4;G3V4S5;G3V2S7;H0YJC4	0.97409
O14949	0.80053	H0Y7R8	1.0022	Q13573;G3V3A4;G3V4X8;G3V5R3	0.90737	F5GXW5;Q99622	0.4223	F5H2D9;K7EP06;O43148;O43148-2	1.1245	G5E972;P42167;P42167-2;A2T926;H0YJH7	1.0321
O14979-3;O14979-2;O14979	1.1938	O43598-2;O43598;H0Y8X4	0.96932	G3V470;G3V5X7;Q99973-2;Q99973;G3V591;G3V2A4	0.12052	F5H895;F5GXX5;P61803	0.88258	F5H2F2;P54687-4;P54687;P54687-5	1.1068	Q9BQ52-4;G5E9D5;Q9BQ52;H7C2I4;Q9BQ52-2;E7ES68;H7C3Y9;Q9BQ52-3	0.8785
O14980;C9JKM9;C9J673;C9IZS4;C9JQ02;C9JV99;F8WF71;C9JF49;C9IYM2;H7BZC5	0.93397	Q96DT7-4;H0YBE6;Q96DT7-3;Q96DT7-2;Q96DT7	NaN	G3V4C1	1.126	F5GYN4;Q96FW1;J3KR44;F5H6Q1;F5GYJ8;F5H3F0;Q96FW1-2	1.0258	P11586;G3V2B8;F5H2F4;G3V3L6	0.99412	Q12906;G5E9M5;Q12906-5;Q12906-4;Q12906-2;Q12906-6;Q12906-3;K7EKJ9;K7EQR9;K7ER69;K7ERM6;K7ENK6;K7EM82;K7EJ09;K7EKY0;K7EPG3;Q96SI9-2;Q96SI9;K7ELV3	0.92529
O15042-2;O15042;O15042-3;E7ET15;C9JB80;C9JDJ7;C9J5L1;H7C4V2;E7EW00;H0Y8D9	0.84766	H0YBL1;P29218;P29218-3	0.88813	G3V4F2;Q86TX2;P49753	0.67034	J3QL14;F8WEN9;P61421;F5GYQ1	1.0834	H0YDJ3;F5H2U2;Q13523;H0YEC8	1.1443	O75534-2;O75534;O75534-3;G5E9Q2;E9PLT0;E9PKN4;E9PLD4;E9PNG3	1.062
O15067;F5GWT9;J3KTQ5;J3QSG0;J3QSH6	1.0248	H0YDU8;P53041;A8MU39	0.85722	P60983;G3V4P8;M0QYG8;M0R1D2;M0R0C1;M0QYJ8;O60234	0.98125	F5GZ49;F5H0U5;Q9NZD2	0.77916	G3V1P4;G5EA58;F5H345;P08397-2;P08397;F5GY90;F5H226	1.0125	G5E9W3;Q9UKF6	1.1136
O15116;E5RJ47;E5RH18	1.2193	H0YEB6;E9PN57;H0YEK1;G3V1B8;O60232	NaN	G3V5E4;G3V4W4;Q96EK6	1.0423	Q9Y639-3;Q9Y639-1;Q9UFM8;Q9Y639-4;H7BXJ1;Q9Y639-5;F5GZD0;Q9Y639;H3BU51;F5GYM7	1.1725	F5H365;Q15436;B3KXI2;F5H6C4;G3V531;G3V4V1;G3V1W4;G3V3G5;G3V2R6;G3V5X8;G3V4Q2;G3V5K1;G3V299	1.0346	G5E9Z2;Q96KA5-2;Q96KA5	0.58279
O15144;H7C3F9	1.0329	H0YH15;O60306	NaN	O75909-1;G3V5E1;O75909;O75909-4;O75909-2	0.98758	Q9H2U1-3;Q9H2U1-2;F5GZS0;Q9H2U1;E7EWK3	1.1314	P05023-3;P05023;F5H3A1;P05023-2;M0R116;P13637;F5H6J6;B7Z2T0;B1AKY9;P50993;H0Y7C1;Q13733;Q5TC01;E9PRA5;P20648;P54707;P54707-2;Q5TC02;M0QXF2	0.99823	Q92879-5;Q92879-2;Q92879-3;Q92879;Q92879-4;G5EA30	0.73836
O15145;F8VR50;C9JZD1	1.1128	P82979;H0YHG0;F8VZQ9;Q567R9;F8VS12	0.82709	G3V5P4;Q9Y281;F8WDN3	0.94133	P08195-2;P08195-3;F5GZS6;P08195;J3KPF3;P08195-4;H0YFS2;F5H867;F5H0E2;F5GZI0;H0YFX4;F5GZR9	0.92917	F5H425;O75822;B4DUI3;H0YGJ7;H0YLP3	0.87262	G5EA52;P30101	0.93782
O15260-2;Q5T8U5;Q5T8U7;O15260;B7Z6A4	1.1973	H0YHI8;O14974-5;O14974-2;O14974	0.9179	P60900;G3V5Z7;G3V295;G3V3I1;B4DXJ9;G3V3U4;B4DQR4;G3V4S5;G3V2S7;H0YJC4	1.0638	F5H643;F8W898;Q9H9Y6-2;Q9H9Y6;F5GZX4	1.1377	Q99816-2;F5H442;Q99816	NaN	Q5T6H7;Q9NQW7-2;Q9NQW7;G8JLB2;Q9NQW7-3	0.80901
O15355	1.2692	H0YHS6;Q9Y2Z4	1.9268	G3XA94;Q9NPL8	1.4095	F5H0B0;P55327-2;P55327-4;P55327;D0UFD3;C9J502;D0UFD1;P55327-3;E5RFR7;H0YC44;D0UFD5;E5RK35;H0YC42;H0YAT2;H7C5V3;Q9Y2Q9	1.1195	F5H4J2;O75381-2;O75381	0.9521	P31943;G8JLB6;E9PCY7;D6RIT2;D6RIU0;D6RBM0;H0YB39;E7EQJ0;D6RAM1;E5RGV0;D6R9T0;D6RFM3;D6RDU3;D6RJ04;D6RIH9;E7EN40;H0YBG7;H0YBD7;D6RDL0;F5GZT4;D6R9D3;D6RF17;E5RGH4;E5RJ94;H0YAQ2	1.0148
O15479	1.2653	H0YKT4;H0YNG3;H0YK72;P67812;H0YK83	1.182	Q9Y5J9;G3XAN8	0.94881	F5H0L8;Q9Y6Y8;Q9Y6Y8-2	NaN	F5H506;Q9HCU8	0.68146	G8JLI6;Q8IVL6	1.3332
O43143;B0V0F8;O60231	1.0544	P33316-2;H0YNW5;H0YKC5;P33316;H0YMM5;H0YNJ9;H0YKI0;H0Y477;H0YMP1	0.96478	G5E972;P42167;P42167-2;A2T926;H0YJH7	1.0381	K7ENF1;K7ESC7;F5H0M0;Q15067-3;Q15067-2;Q15067	1	Q8WUW1;F5H577;Q8WUW1-2	NaN	Q9H6R4-2;G8JLK7;Q9H6R4-4;Q9H6R4	1.4057
O43172-2;O43172	1.1387	H0YKK6;Q06323;H0YNE3;A6NJG9	0.94201	Q9BQ52-4;G5E9D5;Q9BQ52;E7ES68;Q9BQ52-3;H7C3Y9;H7C2I4;Q9BQ52-2	1.1336	F5H157;Q15286;Q15286-2	NaN	F5H5A9;Q9Y2Z0-2;Q9Y2Z0	1.0199	H0Y4J6;P00568;Q5T9B7;H0YID2	0.72873
O43175;Q5SZU1	0.90771	H0YM70;Q9UL46;H0YKU2	0.96028	Q15555-4;G5E9I6;Q15555-3;Q15555;K7EL66;K7ERD8;Q15555-2	1.0586	F5H1G8;Q14344	0.91496	Q5T8N1;F5H5C2;Q8WUM0	0.90408	H0Y4Z7;P43155-3;P43155-2;P43155	0.69853
O43242;B4DT72;H0YGV8	0.99779	H3BLU7;O43488;Q8NHP1;H7C5H7;O95154	1.0275	Q12906;G5E9M5;Q12906-5;Q12906-4;Q12906-2;Q12906-6;Q12906-3;K7EQR9;K7EKJ9;K7ER69;K7EKY0;Q96SI9-2;Q96SI9;K7ERM6;K7ENK6;K7EM82;K7ELV3;K7EJ09;K7EPG3	0.99107	F5H1S8;Q14165;H0YG07;F5GX14	1.1664	Q12849-5;F5H5I6;H0Y8R1;H0YAK1;Q12849;H0YAM1	0.93564	Q969Q0;P83881;H7BZ11;H0Y5B4;J3KQN4	0.91845
O43390;Q2L7G6;O43390-2;E7ETM7	1.0127	Q92841;H3BLZ8;Q92841-1;Q92841-3;Q92841-2;C9JMU5;G5E9L5	1.0272	O75534-2;O75534;O75534-3;G5E9Q2;E9PLT0;E9PLD4;E9PKN4;E9PNG3	1.0244	F5H1S9;G8JLB3;Q9Y606-2;Q9Y606;F5H168;F5GY32;F8W9U5;F5H1B2;F5GXL3	1.0455	F5H5Y3;G3V1U4;Q9UHB9;Q9UHB9-2;Q9UHB9-3	0.95146	H0Y612;Q9UPN9-2;Q9UPN9	1.2972
O43399-2;O43399-4;O43399;O43399-3;O43399-5;Q5JWU6;O43399-6	1.0501	H3BV80;Q15287-3;Q15287-2;H3BMM9;H3BTC0;Q15287;H3BMS0;H3BR57;H3BPG5	0.99647	G5E9W7;G5E9V5;P82650;H7C5F2;Q9H3I1;H7C5H3	1.0437	F5H223;Q13561;Q13561-3;Q13561-2;F5H2S7;H0YI98;F8WAG8;F8VW18;F8W1I6;H0YHL1;F8VX93;F8VRV7	1.0006	F5H668;H0YGL6;P20340-2;P20340;H7BYW1;C9JU14;J3KR73;F5GZB1;B7Z337;Q9NRW1;C9JB90;F5H3K7;F5GXN4;P20340-3;Q14964	0.88377	H0Y650;Q86Y56;Q86Y56-3;E9PGY2;H7C3B1;Q86Y56-2	0.7974
O43491;O43491-2;E9PII3;O43491-3;E9PK52;E9PPD9;E9PHY5;J3KT37;Q6ZSX4;E9PMG5;E9PN54;E9PMV8;H0Y5B0;Q6R5J7;Q9Y2J2-3;Q9Y2J2-2;F5GX05;Q9Y2J2	2.4814	Q86WV2;H3BN72;H3BNV9;P13073;H3BNI5;H3BPG0	0.87087	Q9P2E5-2;G5E9W2;Q9P2E5	1.2229	Q7LBC6-3;F5H275;Q7LBC6-2;Q7LBC6	1.1541	F5H669;Q8N684-2;Q8N684;Q8N684-3;J3QT54;F5H6M0;F5H047	1.247	H0Y6Y5;Q13505-3;Q13505	0.96992
O43615;M0QXU7;M0R301;M0QXM9;M0R124	1.0419	H3BS70;Q96DC0;P42126-2;H3BP91;P42126	0.89894	G5E9W3;Q9UKF6	0.97119	Q1M185;Q1M188;Q1M186;F5H2U8;Q1M187;P52926-2;P52926;F5H2A4;F5H6H0	0.76986	F5H698;Q9P2J5;B4DJ10;B4DER1	1.0436	H0Y746;Q96T76-5;Q96T76-9;Q96T76;Q96T76-8	NaN
O43681	0.86043	P35637-2;P35637;H3BPE7	0.93652	G5E9Z2;Q96KA5-2;Q96KA5	1.0372	F5H2F2;P54687-4;P54687;P54687-5	0.91229	F5H6D0;Q13724;C9J8D4	0.92979	P62158;H0Y7A7;E7ETZ0;E7EMB3;M0QZ52;Q96HY3;F8WBR5;G3V479;G3V361;G3V226;C9J7T9;P27482;P02585	0.96581
O43707;D6PXK4;F5GXS2;P12814-2;P12814;P12814-3;B7TY16;H7C144;H9KV75;P35609;B2RCS5;G3V2W4;Q08043;K7EJH8;G3V2N5;G3V2E8;K7EP19;G3V5M4;G3V2X9;H0YJ11;H0YJW3;H7C5W8;B7Z4P8;Q9H254-2;C9JRP8;M0QZQ3;Q9H254-4;Q9H254	1.0522	H3BPK3;Q16775-2;Q16775;H3BPQ4;H3BV79;H3BQW8	1.0708	Q92879-5;Q92879-2;Q92879-3;Q92879;Q92879-4;G5EA30;E9PQK4;E9PSH0;E9PKU1;E9PKA1;F5H4Y5;F5H0D8;B4DIB6;O95319-5;O95319-2;Q5VZZ6;O95319;O95319-4;O95319-3;E9PC62	1.0731	P11586;G3V2B8;F5H2F4;G3V3L6	1.0151	P61769;F5H6I0;H0YLF3	1.0091	H0Y8U4;P35251-2;P35251	0.68175
O43765;K7EMD6;K7ERW5	0.90792	H3BQP1;Q14694;Q14694-3;Q14694-2;H3BNS8	1.0435	G5EA52;P30101	0.95268	F5H2U2;Q13523;H0YDJ3;H0YEC8	1.1436	F5H6N1;Q96A72;A6NEC0;F5H124	1.1364	O43598;H0Y8X4;O43598-2	0.91881
O43776;B4DN60;K7EMQ6;K7EPK2;K7EQ35	0.96571	H3BQQ2;Q86UK7-2;Q86UK7-3;Q86UK7	1.1569	Q5T6H7;Q9NQW7-2;Q9NQW7;G8JLB2;Q9NQW7-3	0.90962	G3V1P4;G5EA58;F5H345;P08397-2;P08397	0.97171	F5H721;Q9Y2W2;F5H5G4	0.84439	H0Y9X2;P48729;P48729-2	1.1878
O43809;H3BV41;H3BND3	NaN	H3BQZ7;Q1KMD3	1.2128	P31943;G8JLB6;E9PCY7;D6RIT2;D6RIU0;D6RBM0;D6RAM1;E5RGV0;D6R9T0;D6RFM3;D6RDU3;D6RJ04;D6RIH9;H0YB39;E7EQJ0;E7EN40;H0YBG7;H0YBD7;D6RDL0;E5RGH4;F5GZT4;D6R9D3;D6RF17;H0YAQ2;E5RJ94	1.0027	F5H365;Q15436;F5H6C4;B3KXI2;G3V531;G3V5X8;G3V4Q2;G3V4V1;G3V1W4;G3V3G5;G3V2R6;G3V5K1;G3V299	1.0618	F5H7B0;Q15477	0.97827	H0YAS9;Q15006	1.6449
O43852-2;O43852;O43852-4;O43852-3;H0Y875;O43852-15;O43852-9;O43852-5;O43852-12;O43852-13;O43852-14;O43852-7;O43852-11;O43852-8;O43852-10;O43852-6	0.95783	H3BQZ9;P07741;P07741-2;H3BSW3;H3BQF1;H3BQB1	0.92006	G8JLK7;Q9H6R4-4;Q9H6R4;Q9H6R4-2	1.2945	P05023-3;P05023;F5H3A1;P05023-2;M0R116;B1AKY9;P13637;P50993;F5H6J6;B7Z2T0;H0Y7C1;Q13733;E9PRA5;P54707;P54707-2;Q5TC01;P20648;Q5TC02;M0QXF2	1.0182	F5H7E2;P42285	1.0814	H0YBX3;P52758;H0YB34	0.82197
O43865;O43865-2;Q96HN2-4;Q96HN2-3;D7UEQ7;H0Y8B3;F8W7N8;Q96HN2-2;Q96HN2	0.61789	H3BRV0;Q99613;B5ME19;H3BPE3;H3BPE4;H3BTY8	0.98677	Q01433-3;Q01433-5;Q01433-2;Q01433-4;H0Y360;Q01433	0.90533	F5H425;O75822;B4DUI3	0.91036	F5H7M3;H0YDD4;P10515;E9PEJ4	0.96959	H0YBL1;P29218;P29218-3;E5RG13;E5RIP7	0.89281
O60264;F6TQG2;P28370-2;P28370	1.0193	H3BRV9;P61970;J3QS01	0.99027	H0Y4Z7;P43155-3;P43155-2;P43155	0.76036	Q99816-2;F5H442;Q99816	0.53239	F5H897;Q12931;I3L0K7;I3L239;I3L2D5	1.0403	H0YCG0;Q14160-2;Q14160;Q14160-3	0.80289
O60506-4;O60506-3;O60506-2;O60506;O60506-5;F6UXX1	1.0648	H3BRY5;P50225;P50224;Q1ET66;H3BNY7;H3BQX5;P50224-2;P50225-2;E9PKW4;P50226	0.67346	Q969Q0;P83881;H7BZ11;H0Y5B4;J3KQN4	0.95101	F5H456;Q5JTH9-2;Q5JTH9-3;Q5JTH9	0.96242	M0QYS5;F5H8D7;P18887;M0QZ96;M0R0D2;M0R1U8	0.88811	H0YDD4;P10515;F5H7M3;E9PEJ4	0.88515
O60684	NaN	Q9P035;H3BS72;B4DRF4;H3BPZ1;H3BMZ1;H3BRL8	0.93424	H0Y5G9	0.97248	F5H459;Q92572	1.107	Q99733;F5HFY4;C9J6D1;C9JZI7;E9PNW0;E9PJJ2;E9PS34;E9PNJ7;A8MXH2;E9PKT8;E9PKI2;E9PP22;H0YCI4;C9J1B1	0.91878	H0YDP7;Q13405	1.0681
O60869-2;O60869	0.99031	H3BUM1	NaN	H0Y612;Q9UPN9-2;Q9UPN9	1.145	J3KS14;F5H478;J3KRU5;J3QLH3;Q9UHR5-2;Q9UHR5;J3QQJ0	0.96907	O60341;O60341-2;F6S0T5	0.90512	H0YDU8;P53041;A8MU39	0.91347
O60884	NaN	Q7Z2W9-2;H3BUY0;Q7Z2W9	0.84945	H0Y650;Q86Y56;E9PGY2;Q86Y56-2;Q86Y56-3;H7C3B1	1.4695	Q8WUW1;F5H577;Q8WUW1-2	NaN	F6SBX2;Q9NSE4	0.95234	H0YEK1;H0YEB6;O60232;E9PN57;E9PK41;G3V1B8	1.1555
O75083;D6RD66;O75083-3	1.0731	H3BV16;Q96II6;O96000;H3BPJ9	1.0401	H0Y6J1;Q99549;Q99549-2	0.97434	F5H5A9;Q9Y2Z0-2;Q9Y2Z0	0.90119	F6T1Q0;Q6L8Q7-2;Q6L8Q7	0.95626	H0YEW1;J3KN98;Q38SD2	1.0241
O75131;E5RG68;H0YB26;E5RHZ0;E5RJ85	0.88172	Q7L2E3-3;H7BXY3;Q7L2E3;Q7L2E3-2	0.8707	H0Y6Y5;Q13505-3;Q13505	0.96583	Q5T8N1;F5H5C2;Q8WUM0	1.075	F8VPD4;P27708;H7C2E4;H7BZB3;H7C3Z5;P31327-2;P31327;J3KQL0	1.0244	H0YG82;P82673-2;P82673	NaN
O75306-2;O75306;B7Z9L2	0.84318	P22061;P22061-2;J3KP72;H7BY58;B7Z972;F8WDT3;F8WAV5;F8WAX2;H7C4X2;C9J0F2	0.98854	H0Y711;Q9BQA1	1.2788	F5H5E2;Q8NHP8	0.97566	Q13838;Q13838-2;F8VQ10;Q5STU3;B4DP52;F6WLT2;F6UN21;F6TRA5;F6S4E6;F6UJC5;B4DIJ6;H0Y400;F6R6M7;H0YCC6;F6QYI9;F6QWI5;F6U6E2;F6S2B7;E7EMX2	1.0582	H0YH15;O60306	1.0403
O75340-2;O75340;H0Y9X3;H0Y9N1	0.78026	P17096;P17096-3;H7BYM6	0.63546	P62158;H0Y7A7;E7ETZ0;E7EMB3;Q96HY3;M0QZ52;G3V361;F8WBR5;G3V226;G3V479;C9J7T9;P27482;P02585	0.99039	Q12849-5;F5H5I6;H0Y8R1;H0YAK1;Q12849;H0YAM1	0.97707	F8VRK6;H0YH87;Q99700-2;Q24JQ7;F8WB06;F8VQP2;Q99700-4;Q99700	NaN	H0YHI8;O14974-5;O14974-2;O14974	0.75341
O75348;C9JYK3;O95670-2;F2Z307;O95670;C9JRT2	1.3048	H7C312;H7BZ20;P23919	0.73921	O43598;H0Y8X4;O43598-2	1.0561	F5H668;H0YGL6;P20340-2;P20340;H7BYW1;C9JU14;J3KR73;F5GZB1;B7Z337;Q9NRW1;C9JB90;F5H3K7;F5GXN4;P20340-3;Q14964	0.94118	F8VQR7;Q16527;F8VW96	1.1756	H0YHS6;Q9Y2Z4	1.1696
O75367-2;O75367-3;O75367;B4DJC3	0.86601	H7BZG0;Q9NYU2-2;Q9NYU2	1.1657	H0YCV6;P22059	0.64899	F5H669;Q8N684-2;Q8N684;Q8N684-3;J3QT54;F5H6M0;F5H047	0.90825	F8VUA7;F8VQX7;Q9BZF1-3;Q9BZF1-2;Q9BZF1	1.0643	H0YHU4;H0YIH0;Q9UBP6	NaN
O75396	0.9599	H7BZJ3	0.91069	I3L252;H0YCY6;Q3LXA3	1.703	F5H699	1.0475	F8VR82;F8VYE8;P36873;P36873-2;F8W0W8	0.95595	H0YJV7;Q96MM3;P25490;H0YJU4;O15391	1.1722
O75400-2;O75400-3;O75400	0.80623	P61956-2;P61956;H7BZT4;Q6EEV6	0.94405	H0YCY8;P53634	0.93835	F5H6B2;Q9UHN6	0.87728	P09651-3;F8VXY0;F8VRQ1;P09651-2;F8W6I7;P09651;F8VSB5;F8W1S7;F8VZ49;F8VTQ5;Q32P51;F8W646;J3KQA8;H0YH80;F8VYN5	1.1211	H0YNG3;H0YK72;P67812;H0YK83;H0YNX5;H0YKT4;H0YNA5;B4DUL4	1.3058
O75436;G3V1N8;O75436-2;F5H4L7	0.59892	O00422;H7BZW6	0.99506	Q5TC12-2;H0YD21;Q5TC12-3;Q5TC12;I3L448;H0YCA6	1.1978	F5H6D0;Q13724;C9J8D4	0.97635	Q12792-4;F8VS81;Q12792;Q12792-3	0.78249	P33316-2;H0YNW5;H0YKC5;P33316;H0YMM5;H0YNJ9;H0YKI0;H0Y477;H0YMP1	0.95794
O75438;O75438-2	0.61078	H7C0Q6;Q9C037-3;Q9C037-2;Q9C037	1.1202	H0YDD4;P10515;F5H7M3;E9PEJ4	0.97058	P61769;F5H6I0	0.97721	F8VSC5;Q6P3W7;H0YIK6	0.83107	P46779;P46779-2;P46779-3;H0YKD8;C9JB50;G5E9L2;H0YLP6;H0YMF4	1.0861
O75475;O75475-3;O75475-2;H3BPQ6;Q9Y3E1	0.99522	P30042-2;H7C1F6;P30042;H7C2G3;H7C455;F2Z2Q0;H7BYH1	0.78522	H0YDU8;P53041;A8MU39	0.9784	F5H6N1;Q96A72;F5H3U9;F5H6P7;A6NEC0;F5H124	1.3169	F8VUA2;F8VVT7;Q9HD42;F5H875	1.1165	H0YMZ1;H0YL69;P25789;H0YMA1;H0YN18;H0YKT8;H0YLS6;H0YLC2;H0YMI6;P25789-2;H0YKS0	0.95333
O75494-5;Q5JRI1;O75494-4;O75494-6;O75494-3;O75494-2;O75494	0.84828	H7C2I8;Q9H0C8	1.038	H0YEK1;H0YEB6;O60232;E9PN57;E9PK41;G3V1B8	0.84328	F5H721;Q9Y2W2;F5H5G4	0.82728	F8VUY8;Q96QD8	NaN	H0YLC7;Q53XA7;P16930	1.297
O75531	1.118	Q99848;H7C2Q8	1.0027	H0YFP3;P50336	2.553	F5H7E2;P42285;H0YAC4	1.043	P61923;F8VVA7;F8VXB1;F8VUC5;F8W156;F8W651;F8VS17;F8VYZ4;F8VWL5;F8VXR1;F8VYK5;B4DHZ0;B4DDX8	1.0244	O94788-2;H0YMG7;O94788-3;O94788;H0YM00;Q9UED3;H0YKL3	0.89146
O75533;H7C341	1.0546	H7C3A1;Q9BXP5-5;Q9BXP5-4;Q9BXP5-2;Q9BXP5-3;Q9BXP5;H7C1K0;H7C159	1.0554	P82979;H0YHG0;F8VZQ9;Q567R9;F8VS12	0.94521	F5H7M3;H0YDD4;P10515;E9PEJ4	0.97773	Q8TAQ2-2;Q8TAQ2-3;Q8TAQ2;F8VXC8;F8VZW6	1.0686	H0YN26;P39687;O95626;O43423	0.96532
O75607	1.1663	H7C3P6;J3KP29;P52948-6;P52948-2;P52948-5;P52948;H0YDF4	0.93616	H0YHI8;O14974-5;O14974-2;O14974	0.91016	F5H7Y0;Q96HC4;E9PBF5;Q96HC4-4;D6RB78;H0YBI4;Q96HC4-3;F5H0X8;H0Y8Y3;Q96HC4-2;D3YTJ1	1.1255	Q9UBQ0;Q9UBQ0-2;H3BLV8;F8VXU5	1.105	H0YN81;Q9GZS3;H0YL19;H0YLA1;H3BQA8;H0YMF9	0.76058
O75643;O75643-2;C9JAQ9;B4E0P5	1.0214	H7C5L1;Q9H7Z7	1.9949	H0YHS6;Q9Y2Z4	1.1778	F5H897;Q12931;I3L0K7;I3L239;I3L2D5	1.033	P54819-2;F8W1A4;P54819;P54819-3;P54819-5;F8VZG5;F8VY04;P54819-6;P54819-4;G3V213;F8VPP1	0.98187	H3BLU7;O43488;Q8NHP1;O95154	1.0847
O75663-2;O75663	NaN	H9KV68	0.9374	H0YHU4;H0YIH0;Q9UBP6	0.72056	M0QYS5;F5H8D7;P18887;M0QZ96;M0R0D2;M0R1U8	0.85525	F8W6E4;P43304-2;P43304;F5GYK7	0.94274	Q92841;H3BLZ8;Q92841-1;Q92841-3;Q92841-2;C9JMU5;G5E9L5	0.93563
O75844	1.3396	Q6Y7W6-4;Q6Y7W6;Q6Y7W6-3;I1E4Y6;C9JH18;E9PC50	0.85458	H0YKT4;H0YNG3;H0YK72;P67812;H0YK83	1.2466	Q99733;F5HFY4;C9J6D1;C9JZI7;E9PNW0;E9PJJ2;E9PS34;E9PNJ7;A8MXH2;E9PKT8;E9PKI2;E9PP22;C9J1B1;H0YCI4	0.83995	Q9UHY1;F8W6G1;C9JHZ6	0.84548	H3BM38;O00161;H3BNE1;H3BR18;H3BPJ0;O00161-2;H3BNG6;H3BU94;H3BR99;H3BV99;H3BP15;H3BQY9	NaN
O75874;C9J4N6;C9JJE5;C9JLU6	1.0158	I3L0H8;Q9NUU7;H3BTB3;J3QRH0;H3BSL8;H0YD26;H3BMQ5;H3BN59;Q9UHL0-2;B4DRZ7;I3L352;E9PR46;Q9UMR2-2;Q9UMR2-4;J3QL17;Q9UMR2;Q9UHL0;H3BQK0	0.98117	P33316-2;H0YNW5;H0YKC5;P33316;H0YMM5;H0YNJ9;H0YKI0;H0Y477;H0YMP1	0.93793	O60341;O60341-2;F6S0T5	0.87721	G5E9S8;Q07866-8;G3V2E7;Q07866-2;Q07866-3;Q07866;F8W6L3;Q07866-7;G3V3H3;Q07866-5;Q07866-10;Q07866-6;G3V5R9;Q07866-4;Q07866-9;E7EVH7;A8MZ87;H0YJU9;G3V2P7;H0YJL0;H0YJT3;H0YG16;B4DME9;Q9NSK0;Q9NSK0-3	0.98985	H3BV80;Q15287-3;Q15287-2;H3BMM9;H3BTC0;Q15287;H3BMS0;H3BR57;H3BPG5	0.91966
O75881	NaN	I3L276;I3L4P8;I3L463;I3L159;I3L1F5;P30519;I3L430	1.6116	P46779;P46779-2;P46779-3;H0YKD8;C9JB50;G5E9L2;H0YLP6;H0YMF4	1.1625	Q8N4H5;Q5JRT7;F6S928;F8W8Z9	0.95817	P35580;P35580-2;F8W6L6;P35580-3;P35580-4;E7ERA5	0.9921	Q86WV2;H3BN72;H3BNV9;P13073;H3BNI5;H3BPG0	0.88033
O75915;F8WF90;C9JQU6;F8WF33	1.206	I3L1P8;Q02978;F5GY65	1.0461	H0YMZ1;H0YN18;H0YL69;P25789;H0YKT8;H0YMA1;P25789-2;H0YMI6;H0YKS0;H0YLS6;H0YLC2	1.0132	F6SBX2;Q9NSE4	0.9348	F8W6R3;P43897;P43897-2;C9JG32;P43897-3;C9JT21;F8VPA7;P43897-4;F8VS27	1.0338	H3BV04;H3BN93;H3BUB6;H3BPL9;O15127	0.65805
O75937	1.009	I3L397;P63241;P63241-2;I3L504	1.1121	H0YLC7;Q53XA7;P16930	0.91152	F6TQG2;P28370-2;P28370	NaN	F8W7Q4;Q96A26;E9PH05	1.1231	H3BN98;H3BPJ2;F5GXP4;Q15041	0.87474
O75947-2;O75947;F5H608	1.0578	P35613-2;I3L4S8;P35613;I3L192;P35613-3;P35613-4	0.97326	H0YM70;Q9UL46;H0YKU2	0.98556	F8VPD4;P27708;H7C2E4;H7BZB3;H7C3Z5	1.0325	F8W840;Q9BYJ9;Q7Z739	1.0137	H3BNW0;Q9NXG2	0.87896
O75964;E9PN17	1.0236	J3KMY7;Q9GZT3;H0YJ40;G3V4X6;G3V2S9;H0YJW7;H0YJ07;H0YJU7;H0YJI1	1.1816	O94788-2;H0YMG7;O94788-3;O94788;H0YM00	1.0285	Q13838;Q13838-2;F8VQ10;Q5STU3;F6WLT2;B4DP52;F6UN21;F6TRA5;F6S4E6;F6UJC5;B4DIJ6;H0Y400;F6R6M7;H0YCC6;F6QYI9;F6QWI5;F6U6E2;K7EN69;F6S2B7;E7EMX2;K7ENP6;K7EL56;K7EIL8;F6SXL5;K7EN25	1.0568	F8W8K5;Q9UMY4-2;Q9UMY4	0.8068	H3BPK3;Q16775-2;Q16775;H3BV79;H3BQW8;H3BPQ4	0.98913
O76003	1.4999	Q5VYK3;J3KN16	0.91269	Q71UM5;H0YMV8;C9JLI6	2.3194	H0YH87;Q99700-2;Q24JQ7;F8WB06;F8VQP2;Q99700-4;Q99700;F8VRK6;F8VZQ7;F8W0B5	NaN	F8W914;Q9NQC3-2;Q9NQC3-5;Q9NQC3;Q9NQC3-3;H7C106;Q9NQC3-4;F8WAM4;Q9NQC3-6	0.81166	H3BPL5;Q96ES7	1.3326
O76031	1.0525	J3KN55;Q96EY8	2.6132	H0YN26;P39687;H7BZ09;O95626;O43423	0.88373	F8VQR7;Q16527;F8VW96	1.174	Q9Y6M1-5;Q9Y6M1-6;Q9Y6M1-3;Q9Y6M1-4;Q9Y6M1-1;Q9Y6M1;F8W930	1.2871	H3BPR2;Q13232	0.80932
O94822;O94822-3	0.1389	Q96GX9;J3KN82;Q96GX9-3	1.171	H3BLU7;O43488;Q8NHP1;H7C5H7;O95154	1.1485	F8VRL4;F8VRR0;Q9NZJ9-3;Q96G61;Q8NFP7;Q9NZJ9;Q9NZJ9-2	1.0033	H0YL53;O43663-3;F8W9B5;O43663-2;H9KV59;O43663	NaN	H3BQQ2;Q86UK7-2;Q86UK7-3;Q86UK7	0.9553
O94826	1.0987	O15027-2;O15027-4;O15027-3;O15027;O15027-5;J3KNL6	0.97715	Q92841;H3BLZ8;Q92841-1;Q92841-3;Q92841-2;C9JMU5;G5E9L5	0.95227	P09651-3;F8VXY0;F8VRQ1;P09651-2;F8W6I7;P09651;F8VSB5;F8W1S7;F8VZ49;F8VTQ5;Q32P51;F8W646;J3KQA8;H0YH80;F8VYN5	1.0854	F8W9S7;Q14C86-3;Q14C86-4;Q14C86-5;Q14C86-2;Q14C86;Q14C86-6	0.58994	H3BQZ7;Q1KMD3	0.83552
O94906-2;O94906	1.0139	J3KNT0;Q16658;C9JPH9;C9JFC0;H7BYX5	0.99405	H3BV80;Q15287-3;Q15287-2;H3BMM9;H3BTC0;Q15287;H3BMS0;H3BR57;H3BPG5	0.93033	F8VSC5;Q6P3W7;H0YIK6	1.0044	F8W9U3;Q96IU4;Q96IU4-2;B4DQI4	0.93209	H3BRV0;Q99613;B5ME19;H3BPE3;H3BPE4;H3BTY8	0.95675
O95202;O95202-2;O95202-3	0.88451	J3KP30;Q5QJE6	0.47674	Q86WV2;H3BN72;H3BNV9;P13073;H3BNI5;H3BPG0	0.94426	H0YI23;F8VU51;H0YIQ2;P49750-3;P49750;P49750-4	NaN	F8WA86;Q15417;B4DFK6;E9PDU6	1.1045	H3BRV9;P61970;J3QS01	1.1402
O95292;E5RK64;O95292-2	0.70303	O95232;J3KPP4;B4DJ96;D6RDI2;D6RHH0;H7C5U7;O95232-2;C9JL41;H0YA81	0.90701	H3BN98;H3BPJ2;F5GXP4;Q15041	1.0708	F8VUA2;F8VVT7;Q9HD42;F5H875	1.0409	F8WAK8;Q8N3U4;Q8N3U4-2	1.0242	H3BV19;H3BSA1;P19784	0.68247
O95347-2;O95347;Q5T821	1.1441	J3KPV4;P33991;E5RG31;E7ER43;E5RK04;E5RHP5;E5RFJ8	0.9784	P42126-2;H3BP91;P42126;H3BS70;Q96DC0	1.2132	P61923;F8VVA7;F8VXB1;F8VUC5;F8W156;F8W651;F8VS17;F8VYZ4;F8VWL5;F8VXR1;F8VYK5;B4DHZ0;B4DDX8	1.031	F8WBJ6;Q9NRX1	1.0053	Q969X6-2;Q969X6;H3BSH7	0.65362
O95373;E9PLJ0;E9PLB2	0.95332	Q99623;J3KPX7;F5GY37;Q99623-2;B4DW05;F5H3X6;F5GWA7;F5H0C5;F5H2D2;F5H0S4	1.0398	H3BPK3;Q16775-2;Q16775;H3BPQ4;H3BV79;H3BQW8	1.1551	Q8TAQ2-2;Q8TAQ2-3;Q8TAQ2;F8VXC8;F8VZW6	1.1325	J3QRU4;P63027;F8WCA0;L7N2F9;K7ENK9;K7EKX0	NaN	H3BUR4;Q9ULX3	1.0228
Q5TIH2;O95562	1.178	Q16836;J3KQ17;Q16836-2;E9PF18	1.044	H3BPR2;Q13232	0.92116	Q9UBQ0;Q9UBQ0-2;H3BLV8;F8VXU5	0.98713	P59998;F8WCF6;P59998-3;F8WDD7;H7C0A3;P59998-2;F6TTL5;F8WDW3;F8WE39	0.97568	Q7Z2W9-2;H3BUY0;Q7Z2W9	1.4671
O95816;A2A296;B4DXE2	NaN	Q9NTK5;J3KQ32;Q9NTK5-2;Q9NTK5-3;C9JCJ9;C9JTK6	1.0501	H3BQZ7;Q1KMD3	1.1647	F8VYE8;P36873;F8W0W8;P36873-2;F8VR82;E7ETD8;B4DNE3;F8W0V8;H0Y3Y6;F8WE71	1.0154	Q14257;F8WCY5;H0YL43;A8MXP8	1.0153	H3BV16;Q96II6;O96000;H3BPJ9	0.86417
O95831-3;O95831;O95831-2;E9PMA0;Q1L6K4;O95831-5;O95831-4	0.8043	Q9Y3E5;J3KQ48	1.0481	H3BQZ9;P07741;P07741-2;H3BSW3;H3BQF1;H3BQB1	0.95465	F8W181;Q02878;F8VZ45;F8VR69;F8VZA3;F8VWR1	1.1171	F8WD00;Q9BVJ6-3;Q9BVJ6;Q9BVJ6-2;Q5TAP6	0.96781	Q5H909;Q9UNF1-2;H7BXW3;Q9UNF1;Q5H907	0.71833
O95881	0.95491	P15170-2;J3KQG6;H3BR35;P15170;Q8IYD1;H3BSV8	1.055	H3BR50;P27449	0.87504	P54819-2;F8W1A4;P54819;P54819-3;P54819-5;F8VZG5;F8VY04;P54819-6;P54819-4;G3V213;F8VPP1	1.022	F8WDI0;Q9NT62-2;Q9NT62	1.0423	Q9Y5U8;H7BXW7	1.589
O96008;K7EKG4;O96008-2;K7EJ57	0.96113	J3KR24;P41252;Q5TCC4;Q5TCC5;Q5TCD2;Q5TCD1	0.97499	H3BRY5;P50225;E9PKW4;P50226;P50224;Q1ET66;H3BNY7;H3BQX5;E9PKR8;P50224-2;P50225-2;E9PM76	0.74153	G5E9S8;Q07866-8;G3V2E7;Q07866-2;Q07866-3;Q07866;F8W6L3;Q07866-7;G3V3H3;Q07866-5;Q07866-10;Q07866-6;G3V5R9;Q07866-4;Q07866-9;E7EVH7;H0YGB8;H0YJU9;H0YJL0;G3V2P7;H0YJT3;H0YG16	0.91878	F8WDT8;G3V0G3;Q9NY93-2;Q9NY93;F8WEI3;H7C3E9	0.9294	Q7L2E3-3;H7BXY3;Q7L2E3;Q7L2E3-2	0.85155
P00338;P00338-3;P00338-4;F5H308;P00338-5;P00338-2;F5GYU2;F5GXY2;F5GXH2;F5H5J4;F5H6W8;F5GZQ4;F5H8H6;F5GXC7;F5GWW2;F5GXU1;F5H5G7;F5H155;G3XAP5;F5H245;Q6ZMR3;P07864	1.0288	J3KRR0;J3QQM5;Q9BT23	1.4732	Q969X6-2;Q969X6;H3BSH7	0.97741	P35580;P35580-2;F8W6L6;P35580-3;P35580-4;E7ERA5	1.0022	F8WEI7;P09382	0.97077	P22061;P22061-2;J3KP72;H7BY58;B7Z972;F8WDT3;F8WAV5;F8WAX2;C9J0F2;H7C4X2	0.90844
P00367;B4DGN5;B3KV55;P49448	1.1507	J3QQT2;J3KRX5;P18621;J3QL51;P18621-2;J3QLC8;J3QS96;J3KRB3;J3KSJ0	0.9479	H3BUU5;P08047	NaN	F8W6R3;P43897;P43897-2	0.89354	Q16630-3;F8WJN3;Q16630;Q16630-2	0.94807	P17096;P17096-3;H7BYM6	0.5759
P00387-2;P00387;P00387-3;B1AHF3	1.0486	J3KS05;P83916;K7ELA4;B5MD17;C9JWS9	0.83644	Q7Z2W9-2;H3BUY0;Q7Z2W9	0.805	O75935-3;F8W786;Q8NB28;O75935-2;O75935	0.64877	G3V117;Q9NPA8;E5RHX8	0.92017	H7C312;H7BZ20;P23919	0.83444
P00390-5;P00390-4;P00390-2;P00390-3;P00390;E5RI06;H0YBD4	0.788	J3KS22;Q7Z4W1;J3QS36;J3QL34;J3QS45;J3KRZ4;J3KSZ5;J3QRQ2	1.0031	Q5H909;Q9UNF1-2;H7BXW3;Q9UNF1;Q5H907	0.83366	F8W840;Q9BYJ9;Q7Z739	1.0469	G3V126;Q9UI12-2;Q9UI12	0.93604	H7BZJ3	0.88059
P00403	1.3019	J3KS31;O43670-3;O43670-2;O43670;J3QRS9;O43670-4	1.0176	Q9Y5U8;H7BXW7	1.087	F8W8K5;Q9UMY4-2;Q9UMY4	0.91705	Q9NY33-4;Q9NY33;G3V1D3;G3V180;E9PNX5;E9PKK8;E9PQ14;E9PPK9;Q9NY33-2	1.1009	P61956-2;P61956;H7BZT4;Q6EEV6;P55854;A8MUA9;B4DUW4;A8MU27	1.0229
P00441;H7BYH4	0.92031	J3QQY2;J3KS45;Q9UM00-2;Q9UM00;J9JIE6	0.8836	P22061;P22061-2;J3KP72;H7BY58;B7Z972;F8WDT3;F8WAV5;F8WAX2;H7C4X2;C9J0F2	0.98089	F8W914;Q9NQC3-2;Q9NQC3-5;Q9NQC3;Q9NQC3-3;H7C106;Q9NQC3-4;F8WAM4;Q9NQC3-6	0.7449	Q9BZZ5-2;G3V1C3;Q9BZZ5;Q9BZZ5-3;Q9BZZ5-5;Q9BZZ5-1;B4E283;H0YER7;E9PQK6	1.0456	H7C0Q6;Q9C037-3;Q9C037-2;Q9C037	1.2121
P00491;G3V5M2;G3V308;G3V393;G3V2H3	1.0725	P17844;J3KTA4;B4DLW8;J3QRQ7;J3KRZ1;J3KRX8;J3QSF1;J3QR02;J3QRN5	1.0435	Q5JRG1;Q9BVL2-2;H7BYF2;Q9BVL2-3;Q9BVL2	0.95151	Q9Y6M1-5;Q9Y6M1-6;Q9Y6M1-3;Q9Y6M1-4;Q9Y6M1-1;Q9Y6M1;F8W930	NaN	Q9BRK5-4;H0Y3T6;Q9BRK5-3;G3V1E2;Q9BRK5-2;Q9BRK5-6;Q9BRK5	NaN	P30042-2;H7C1F6;P30042;H7C455;F2Z2Q0;H7BYH1;H7C2G3	0.9919
P00492;Q9NRG1-2;Q9NRG1	0.97278	J3QR09;J3KTE4;P84098;J3QL15	1.0462	P17096;P17096-3;H7BYM6	0.6395	H0YL53;O43663-3;F8W9B5;O43663-2;H9KV59;O43663	1.0658	Q15165-3;J3QT77;Q15165-1;Q15165;G3V1K3	NaN	Q99848;H7C2Q8	0.75294
P00505;E7ERW2	0.98665	J3KTF8;P52565;J3QQX2;A8MXW0;J3KRY1;J3KRE2;J3KS60	0.98654	H7C312;H7BZ20;P23919	0.8757	F8W9S7;Q14C86-3;Q14C86-4;Q14C86-5;Q14C86-2;Q14C86;Q14C86-6;C9IZX9;B0QZ65;B4DGD8;C9IZ08	NaN	O15226;G3V1N1	1.6512	H7C3A1;Q9BXP5-5;Q9BXP5-4;Q9BXP5-2;Q9BXP5-3;Q9BXP5;H7C1K0;H7C159	0.85784
P00558;B7Z7A9;E7ERH5;P07205	0.94237	Q07955;J3KTL2;Q07955-3;Q07955-2;J3KSR8;J3QQV5;J3KSW7	1.0347	H7BZJ3	0.97498	F8W9U3;Q96IU4;Q96IU4-2;B4DQI4	1.0671	G3V1R9;Q9NPH2-2;Q9NPH2-3;Q9NPH2;B7Z3K3;J3QS51;J3KRH4	0.87738	H7C4E3;Q8N766-4;Q8N766-3;Q8N766-2;Q8N766	0.99903
P00918;E5RID5;E5RK37	1.0773	Q8IWX8;J3QK89	0.60328	P61956-2;P61956;H7BZT4;Q6EEV6;P55854;A8MUA9;B4DUW4;A8MU27	0.92678	F8WA86;Q15417;B4DFK6;E9PDU6	0.8071	M0QXH4;G3V1S7;Q92839;M0R2V0	0.94582	H7C4H2;Q9Y5M8	1.0372
P02545-2;Q6UYC3;P02545-3;P02545;Q5TCI8;D6RAQ3;P02545-4;H0YAB0	0.99308	J3QKR3;P49720;J3KSM3;J3KRR2	1.0176	H7C0D0;Q16850-2;Q16850	1.8651	F8WAK8;Q8N3U4;Q8N3U4-2	0.96858	G3V1X9;P45973;F8VNY3	0.92715	H7C579;Q9NQR4;F8WF70	0.72907
P04040	1.7299	Q13045-2;J3QLG3;Q13045;J3QQU5;J3QLR6;J3QQQ2;J3KS54	0.60854	P61966;H7C1E4	NaN	F8WBJ6;Q9NRX1	1.2053	G3V5I6;Q6PJT7-4;Q6PJT7-3;G3V256;H0YJA2;Q6PJT7-5;Q6PJT7-9;Q6PJT7-2;Q6PJT7;G3V3Y4	1.0231	Q6Y7W6-4;Q6Y7W6;Q6Y7W6-3;I1E4Y6;F8WCD5;C9JPV7;C9JXQ0;C9J0V6;C9JHT0;C9JRZ2;C9JHW1;E7ESB6;E9PC50	3.435
P04075;J3KPS3;H3BQN4;H3BPS8;H3BUH7;H3BR04;H3BMQ8;H3BR68;H3BU78;Q5T7D5;P05062	0.94549	J3QQN4;J3QLK5	1.2272	H7C1F6;P30042;P30042-2;H7C2G3;H7C455;F2Z2Q0;H7BYH1	1.0913	J3QRU4;P63027;F8WCA0;L7N2F9	NaN	Q13404;Q13404-7;Q13404-2;Q13404-1;G3V2F7;Q13404-6;Q13404-8;J3KNL8;E5RGE2;D6RG00	0.96911	Q6PK04;I3L0U5	0.74727
P04080	0.94681	J3QLR8;Q9Y3D9	0.76034	H7C1U8;Q9BUR5;C9J574;Q9BUR5-2	0.90854	P59998;F8WCF6;P59998-3;F8WDD7;H7C0A3;P59998-2;F6TTL5	0.856	P07311;G3V2U7	1.2814	I3L159;I3L1F5;P30519;I3L276;I3L4P8;I3L463;I3L430	0.81519
P04181;P04181-2	1.0064	Q07020;J3QQ67;F8VUA6;F8VYV2;F8VWC5;G3V203;H0YHA7;F8VXR6	1.2106	H7C3P6;J3KP29;P52948-6;P52948-2;P52948-5;P52948;H0YDF4	1.1273	Q14257;F8WCY5;H0YL43;A8MXP8	0.98864	G3V325;C9J8H9;C9JJT5;F8W7V3;P56134-2;F5H4H2;P56134;C9JU26;O75127	1.0533	I3L1L3;Q9BQG0;Q9BQG0-2	0.95191
P04350;M0R278;M0R1I1	NaN	J3QRG6;P42771;P42771-4;K7ES20;P42771-2;K7ENC6;P42772;P42771-3;G3XAG3	1.1704	H7C492;Q9Y276;H7BZF6	2.3203	F8WD00;Q9BVJ6-3;Q9BVJ6;Q9BVJ6-2;Q5TAP6	1.0743	G3V3G7;G3V340;Q13033-2;Q13033;M0R2A7;M0QXN2;M0R0G2;M0R0P4;M0R0W8;F5GYK2;O43815-2;Q9NRL3;F8VYA6;O43815	1.1956	I3L1P8;Q02978;F5GY65	1.0593
P04406;E7EUT4;E7EUT5;O14556	0.97605	P19105;O14950;J3QRS3;J3KTJ1;P24844;P24844-2	1.0771	H7C4H2;Q9Y5M8	0.51187	F8WDI0;Q9NT62-2;Q9NT62	1.017	Q13573;G3V3A4;G3V4X8;G3V5R3	0.96877	P46108-2;I3L297;P46108	0.85323
Q5SRN7;P30455;P30443;P13746;P05534;P04439;Q5SRN5;P13746-2;Q29960-2;B0S7Z4;P01893;Q29940;P30685;P30498;P30495;P30493;P30492;P30491;P30490;P30484;P30464;P18465;P18464;P10319;P30447;P16188;Q29960;P30510;P30508;P30504;B0S7Z5;B0S7Z6;Q31611;B0UXQ1;A9R9N8;A2BDY9;A2ARK8;P17693;Q5RJ85;B0V0C2;Q6DU44;P13747;Q95365;Q29836;Q29718;Q04826;P30488;P30487;P30485;P30483;P30481;P30480;P30479;P30475;P30466;P30462;P30…	1.5109	J3QRZ5;P54578;A6NJA2;B7Z4N8;J3QQT6;J3KS55;H0YA47	1.061	H7C579;Q9NQR4;F8WF70	0.92099	F8WDN2;Q99757	0.81068	Q8NHV4-2;Q8NHV4;G3V3F1	NaN	I3L397;P63241;I3L504;P63241-2;Q6IS14;F8WCJ1;C9J7B5;C9J4W5;Q9GZV4	1.0181
P04843;B7Z4L4;F8WF32	0.90875	J3QSV6;O76021;I3L3U9;I3L3C4;I3L234	1.0369	H7C5L1;Q9H7Z7	0.90812	F8WDT8;G3V0G3;Q9NY93-2;Q9NY93;F8WEI3;H7C3E9	0.92787	G3V4C1	1.1083	I3L4J1;Q9UN37;O75351;Q6PIW4-2;Q6PIW4	0.74557
P04844-2;P04844;F2Z3K5;Q5JYR4;Q5JYR7;H0Y5M1	1.0921	J3QT28;O43684-2;O43684;B4DDM6;J3QSX4	0.98795	H9KV68	0.91935	F8WEI7;P09382	1.0228	G3V4F2;Q86TX2;P49753;B3KSA0;P49753-2	0.78652	P35613-2;I3L4S8;P35613;I3L192;P35613-3;P35613-4	0.91878
P05114;F2Z2W6;F2Z2Y5;H7BXJ5;A6NL93;A6NEL0	0.87384	Q8WXC6;J3QT29	NaN	P46736-4;P46736-2;P46736-3;P46736;H9KVA9	0.3464	Q16630-3;F8WJN3;Q16630;Q16630-2	1.0161	P60983;G3V4P8;M0QYG8;M0R1D2;M0R0C1;M0QYJ8;O60234	1.086	J3KMY7;Q9GZT3;H0YJ40;G3V4X6;G3V2S9;H0YJW7;H0YJ07;H0YJU7;H0YJI1	1.1186
P05141;Q9H0C2	1.0179	Q03252;J9JID7	0.85543	Q6Y7W6-4;Q6Y7W6;Q6Y7W6-3;I1E4Y6;C9JH18;E9PC50	0.98517	G3V126;Q9UI12-2;Q9UI12	1.0694	G3V5E4;G3V4W4;Q96EK6	1.1212	Q9P0J0;J3KN00;B4DEZ3;K7EJE1;B4DF76;E7ENQ6	0.75465
P05198;H0YJS4;G3V4T5	0.92293	Q13620-3;Q13620-1;K4DI93;Q13620;A6NE76;Q13619-2;Q13619	0.93172	I3L276;I3L4P8;I3L463;I3L159;I3L1F5;P30519;I3L430	1.1979	G3V1B8;H0YEB6;O60232;E9PN57;H0YEK1	1.1669	H0YIZ6;H0YJ09;G3V5Z2;G3V4X7;G3V5A5;Q9H6D7-2;G3V541;Q9H6D7-4;Q9H6D7	1.0776	Q5VYK3;J3KN16;Q5VYK5	0.92717
P05204;Q15651-2;O00479;Q15651	0.68791	K7EIJ8;Q8IYT4-2;Q8IYT4;K7EM02	0.98675	I3L1P8;Q02978;F5GY65	1.0594	Q9BZZ5-2;G3V1C3;Q9BZZ5;Q9BZZ5-3;Q9BZZ5-5;Q9BZZ5-1;B4E283;H0YER7;E9PQK6	1.0296	O75909-1;G3V5E1;O75909;O75909-4	0.85879	Q5JPE7-2;Q15155;P69849;Q5JPE7;J3KN36;Q4G177;F5H826	1.0369
P05386	0.9512	K7EJC1;K7EJR3;P48556	1.0706	P46108-2;I3L297;P46108	1.1917	Q15165-3;J3QT77;Q15165-1;Q15165;G3V1K3	1.4924	G3V5P4;Q9Y281;F8WDN3	0.94347	Q5JTV8;J3KN66;H0YD16;H0Y4R4;E9PKD1	0.94768
P05387;H0YDD8	1.0714	K7EPR4;K7EJJ1;K7EMG5;Q9Y6Q5;Q9Y6Q5-2	1.0991	I3L397;P63241;I3L504;P63241-2;F8WCJ1;C9J7B5;C9J4W5;Q9GZV4;Q6IS14	1.0743	O15226;G3V1N1	NaN	P60900;G3V5Z7;G3V295;G3V3I1;B4DXJ9;G3V3U4;B4DQR4;G3V4S5;G3V2S7;H0YJC4	1.0095	Q96GX9;J3KN82;Q96GX9-3	1.1617
P05388;F8VU65;Q3B7A4;F8VWS0;F8VPE8;G3V210;F8VW21;F8VQY6;F8VRK7;Q8NHW5;F8VZS0;F8VWV4;F8VS58;F8W1K8	1.0113	Q7Z451;K7EJT8;P63010;P63010-2;C9J1E7;Q10567-4;Q10567-3;Q10567-2;Q10567;K7EJX1;K7EN71;K7ERB2	1.0269	P35613-2;I3L4S8;P35613;I3L192;P35613-3;P35613-4	0.98228	G3V1R9;Q9NPH2-2;Q9NPH2-3;Q9NPH2;B7Z3K3;J3QS51	0.86645	G3XA94;Q9NPL8	1.3009	O15027-2;O15027-4;O15027-3;O15027;O15027-5;J3KNL6	1.1224
P06493;E5RIU6;P06493-2;K7ELV5;E7ESI2;P24941-2;P24941;Q00526;G3V5T9;G3V317;F8VXD2;F8VYH9;B4DNF9;F8VZZ0;F8VTV8;F8VWX7;F8VZ51;K7EJ83;Q00535-2;H0YAZ9;Q00535;P11802;Q00534;E7EUK8;Q96Q40-2;Q96Q40-4;E5RGN0;Q96Q40-3;O94921-3;F8W6H8;Q96Q40;O94921-2;O94921;F5H6Z0;Q07002;Q07002-2;Q00536;Q00536-3;Q07002-3;Q00537-2;Q00537;Q00536-2;J3QSD7;Q9NYV4-3;Q14004-2;Q9NYV4-2;Q9NYV4;Q14004	1.163	K7EKI4;K7ELF1;K7ELQ0;Q9BYD3-2;K7ES61;Q9BYD3	1.0204	I3L4U9;Q8TAT6;Q8TAT6-2	0.67772	G3V1X9;P45973;F8VNY3	0.87559	Q96M27;G3XAL7;Q96M27-3;Q96M27-2;Q96M27-4;Q96M27-5	0.84059	Q9UJV9;J3KNN5	0.7092
P06576;F8VPV9;H0YH81;F8W079;F8W0P7;H0YI37;F8VQY0	1.0401	K7EKS1;P36954	NaN	I3L531;P53384-2;P53384	NaN	G3V5I6;Q6PJT7-4;Q6PJT7-3;G3V256;H0YJA2;Q6PJT7-5;Q6PJT7-9;Q6PJT7-2;Q6PJT7;G3V3Y4	0.92163	G3XAL9;P55011-3;P55011	NaN	J3KPV4;P33991;E5RG31;E7ER43;E5RHP5;E5RK04	0.99183
P06733;P06733-2;K7EM90;K7EQF3;K7EN23;F5H0C8;P13929-3;B7Z2X9;P13929-2;P13929;P09104;F5H1C3;F5H5U1;F5GWQ3;E5RI09;F5GZ30;E5RG95;K7EPM1;K7EKN2;E5RGZ4	1.0074	K7EM56;P62841;K7ELC2;K7EQJ5;K7EJ78	1.0517	Q9P0J0;J3KN00;B4DEZ3;K7EJE1;B4DF76;E7ENQ6	1.0012	Q13404;Q13404-7;Q13404-2;Q13404-1;G3V2F7;Q13404-8;Q13404-6	0.98551	Q9Y5J9;G3XAN8	1.1005	Q99623;J3KPX7;F5GY37;Q99623-2;B4DW05;F5GWA7;F5H3X6;F5H0C5;F5H2D2;F5H0S4	0.97026
P06737-2;P06737;E9PK47;E9PMM6;P11217-2;P11217;H0Y4Z6	0.98906	P14314-2;P14314;K7ELL7;K7EPW7;K7EKX1;K7EJ70	0.95639	Q5VYK3;J3KN16;Q5VYK5	0.97976	P07311;G3V2U7	0.98837	M0QZ24;G5E928;O00754	NaN	Q16836;J3KQ17;Q16836-2;E9PF18	0.98157
P06744;P06744-2;K7EP41;K7ELR7;K7ERC6;K7ERK8;K7EIL4;K7ENR8;K7ESF4	1.0169	K7EM09;K7EPR0;K7ELQ9;Q6UW68	0.95251	J3KN29;O00233;F5H5V4;F5GX23;F8W7V8;O00233-2;F5H7X1;F5H169;F5H182;O00233-3	0.87406	Q13573;G3V3A4;G3V4X8;G3V5R3	1.1729	G5E972;P42167;P42167-2;A2T926;H0YJH7	0.89059	Q9NTK5;J3KQ32;Q9NTK5-2;Q9NTK5-3;C9JTK6;C9JCJ9	1.0015
P06748;P06748-3;P06748-2;E5RI98;E5RGW4	1.0227	K7ELV2;Q96EE3;Q96EE3-1	NaN	Q5JPE7-2;Q15155;P69849;Q5JPE7;J3KN36;Q4G177;F5H826	0.968	G3V3Y1;Q8N8N7;G3V288;Q8N8N7-2;G3V2R9;G3V3C1	1.1485	G5E9C7;P36507	NaN	Q9Y3E5;J3KQ48	0.92861
P06753-2;Q5VU66;Q5VU59;P06753-3;Q5VU58;Q5VU61;Q5VU72;J3KN67;D6R904;P06753;Q5VU63;K7EP68;K7ERG3;K7ENT6;H0YKX5;H0YNC7;P09493-2;P09493-5;F5H7S3;P07951-3;H7BYY1;H0YK48;H0YL52;B7Z596;Q5TCU3;P09493-7;P09493-6;P09493-4;P09493-3;P09493;P07951-2;P07951;D9YZV8;D9YZV3;D9YZV2;CON__Q3SX28;Q5TCU8;Q6ZN40;H0YL80;H0YKP3;D6RFM2;A6NL28-2;A6NL28	0.96502	K7ELZ9;K7EMW4;Q969V3-2;Q969V3	0.7735	Q96GX9;J3KN82;Q96GX9-3	1.1201	G3V4C1	0.8962	Q9BQ52-4;G5E9D5;Q9BQ52;E7ES68;H7C2I4;Q9BQ52-3;Q9BQ52-2;H7C3Y9	1.0105	Q14318;Q14318-2;J3KQ73;C8C9T5;M0R2K9	0.53313
Q16778;P33778;P23527;P06899;Q6DRA6;Q6DN03	0.96083	P41567;K7EM18;O60739	0.88377	O15027-2;O15027-4;O15027-3;O15027;O15027-5;J3KNL6	1.0448	G3V4F2;Q86TX2;P49753;B3KSA0;P49753-2	0.64931	Q15555-4;G5E9I6;Q15555-3;Q15555;K7EL66;K7ERD8;Q15555-2	0.95978	P15170-2;J3KQG6;H3BR35;P15170;Q8IYD1;H3BSV8	1.1174
P07108;P07108-3;P07108-2;P07108-4;P07108-5	NaN	K7ENG2;P26368-2;P26368	0.96425	Q9UJV9;J3KNN5	0.92185	P60983;G3V4P8;M0QYG8;M0R1D2;M0R0C1;M0QYJ8;O60234	0.91065	Q12906;G5E9M5;Q12906-5;Q12906-4;Q12906-2;Q12906-6;Q12906-3;K7EKJ9;K7EQR9;K7ER69;K7EJ09;K7ERM6;K7ENK6;K7EM82;Q96SI9-2;Q96SI9;K7ELV3;K7EKY0	0.97082	J3KRR0;J3QQM5;Q9BT23	0.67534
P07195;A8MW50;C9J7H8;F5H793	1.0286	K7ENW9	9.1566	J3KNT0;Q16658;C9JPH9;C9JFC0;H7BYX5	1.0004	G3V4W4;Q96EK6;G3V5E4	1.1548	O75534-2;O75534;O75534-3;G5E9Q2;E9PLT0;E9PLD4;E9PNG3	1.0592	J3QQT2;J3KRX5;P18621;J3QL51;P18621-2;J3QLC8;J3QS96;J3KRB3;J3KSJ0	0.84907
P07305;P07305-2	0.62885	K7EPT6;Q92804-2;Q92804;K7ENI1;K7EKB2;K7EL85	0.97543	O95232;J3KPP4;B4DJ96;D6RDI2;D6RHH0;H7C5U7;O95232-2;C9JL41;H0YA81	0.91634	O75909-1;G3V5E1;O75909;O75909-4	0.96711	G5E9W7;G5E9V5;P82650;C9J5D8;H7C5F2;Q9H3I1;H7C5H3	1.1936	J3KS05;P83916;K7ELA4;B5MD17;C9JWS9	0.61035
P07339;H7C469;H7C1V0;F8WD96;C9JH19;F8W787	1.0347	K7EQA9;Q16543;K7EIU0;K7EL68;K7EKQ2	0.91496	J3KPV4;P33991;E7ER43;E5RG31;E5RHP5;E5RK04;E5RFJ8	1.0141	G3V5P4;Q9Y281;F8WDN3	0.99866	G5E9W3;Q9UKF6;C9JZH6	1.1	J3KS22;Q7Z4W1;J3QS36;J3QL34;J3QS45;J3KRZ4;J3KSZ5;J3QRQ2	0.92461
Q5JP53;P07437;Q5ST81;E9PBJ4;G3V2A3;G3V5W4;G3V2R8;G3V3R4;G3V2N6	1.0215	K7EQD9;Q9BRP1	0.93236	Q99623;J3KPX7;F5GY37;Q99623-2;B4DW05;F5GWA7;F5H3X6;F5H0C5;F5H2D2;F5H0S4	1.0134	P60900;G3V5Z7;G3V295;B4DXJ9;G3V3I1;B4DQR4;G3V3U4;G3V4S5;G3V2S7;H0YJC4	1.0085	G5E9Z2;Q96KA5-2;Q96KA5	0.96619	J3KS31;O43670-3;O43670-2;O43670;J3QRS9;O43670-4	0.88031
P07737;K7EJ44;I3L3D5;CON__P02584	1.0413	K7ERZ3;K7EQF4;O60664-3;O60664;K7EL96;K7ER39;O60664-2	1.5482	Q16836;J3KQ17;Q16836-2;E9PF18	0.98444	G3XA94;Q9NPL8	1.067	Q92879-5;Q92879-2;Q92879-3;Q92879;Q92879-4;G5EA30;E9PQK4;E9PSH0;E9PKU1;B4DIB6;O95319-5;O95319-2;Q5VZZ6;O95319;O95319-4;O95319-3;E9PC62	1.0903	J3QQY2;J3KS45;Q9UM00-2;Q9UM00;J9JIE6	0.82577
P07814	0.92774	K7ES02;Q13867;J3KS79;K7ENH5;K7ESE8;J3KSD8;E7EMN3	1.3254	Q9NTK5;J3KQ32;Q9NTK5-2;Q9NTK5-3;C9JCJ9;C9JTK6	1.0661	H0YJ00;P51003-2;Q9NRJ5;G3XAH6;P51003	0.91367	G5EA52;P30101	0.98375	J3KSQ6;J3QR04;P63272	1.2555
P07858	1.0206	P50570-2;K7ESI9;P50570;P50570-3;F5H4R9;E9PEQ4;Q05193-5;Q05193-3;Q05193-4;Q05193-2;Q05193;E5RIK2;Q6P2G1;E5RHK8;Q9UQ16-2;Q9UQ16-3;Q9UQ16;Q9UQ16-4	1.0234	Q9Y3E5;J3KQ48	0.9478	Q96M27;G3XAL7;Q96M27-3;Q96M27-2;Q96M27-4;Q96M27-5	1.0437	Q5T6H7;Q9NQW7-2;Q9NQW7;G8JLB2;Q9NQW7-3	0.932	J3KSS4;J3QRP4;J3QQN6;J3QR27;J3QLU1;J3QKQ0;J3QRD0;J3QRA8;J3QL02;J3KSV5;J3QKT2;Q96KP4-2;Q96KP4	1.0477
P07900;P07900-2;Q86U12;G3V2J8;Q58FG0;Q14568;Q58FG1	0.96249	M0QX71;Q9BQ67	1.2907	Q14318;Q14318-2;J3KQ73;C8C9T5;M0R2K9	1.0986	G3XAL9;P55011-3;P55011	0.87971	P31943;G8JLB6;E9PCY7;D6RIT2;D6RIU0;D6RBM0;E7EQJ0;D6RAM1;D6R9T0;D6RFM3;D6RDU3;D6RJ04;D6RIH9;H0YB39;E5RGV0;E7EN40;D6RDL0;H0YBG7;H0YBD7;D6RF17;F5GZT4;D6R9D3;E5RGH4;E5RJ94;H0YAQ2	1.0131	P17844;J3KTA4;B4DLW8;J3QRQ7;J3QSF1;J3KRZ1;J3QR02;J3KRX8;J3QRN5	1.0198
P07919	0.90047	O14579-2;O14579;M0QXB4;M0R061;O14579-3	1.0804	P15170-2;J3KQG6;P15170;H3BR35;Q8IYD1;H3BSV8	1.0415	Q9Y5J9;G3XAN8	1.002	Q9H6R4-2;G8JLK7;Q9H6R4-4;Q9H6R4	0.77729	J3QR09;J3KTE4;P84098;J3QL15	1.1017
P07954-2;P07954	1.0137	M0QXF7;Q969H8;M0QYN0	1.1446	M0QY17;Q9NWV8-3;M0R3F4;M0R2A4;M0R2K3;M0R193;M0R0I0;M0R2I2;M0QX07;Q9NWV8;J3KQS6	0.95274	G5E972;P42167;P42167-2;H0YJH7	0.93566	H0Y2P2;Q96IV0-3;Q96IV0-2;Q96IV0	0.94685	J3KTF8;P52565;J3QQX2;J3KRE2;A8MXW0;J3KRY1;J3KS60	0.9823
P08107;P08107-2;E7EP94;Q5SP16	0.96694	M0QXM4;Q15758;B4DWS4;Q15758-2;M0QX44	0.90454	J3KR24;P41252;Q5TCC4;Q5TCC5;Q5TCD1;Q5TCD2;Q5TCC6	0.94052	Q9BQ52-4;G5E9D5;Q9BQ52;E7ES68;H7C2I4;Q9BQ52-2;Q9BQ52-3;H7C3Y9	0.8542	H0YAE7;H0Y8N3;Q9HCX4-2;H0Y2U3;Q9HCX4-3;H0Y3E4;H0Y9S0;Q9HCX4	1.0263	Q07955;J3KTL2;Q07955-3;Q07955-2;J3KSR8;J3QQV5;J3KSW7	1.0093
P08238;Q58FF7;Q5T9W8;H0Y6E4;H0Y5S7;H0Y598;Q58FF6	0.97387	M0QZ49;M0QXU9;M0QZI7;Q9HCG1	7.2495	J3KRR0;J3QQM5;Q9BT23	1.1384	Q15555-4;G5E9I6;Q15555-3;Q15555;K7EL66;K7ERD8;Q15555-2	0.86793	H0Y362;Q8NEW0	0.7222	Q8IWX8;J3QK89	0.69229
P08243-2;P08243;P08243-3;F8WEJ5;C9J057;C9JLN6;C9JM09;C9JT45	1.0557	M0QY97;Q9UPT8	NaN	J3KRT0;J3KS23;Q13951;Q13951-2	0.9247	Q12906;G5E9M5;Q12906-5;Q12906-4;Q12906-2;Q12906-6;Q12906-3;K7EQR9;K7EKJ9;K7ER69;Q96SI9-2;Q96SI9;K7ERM6;K7ENK6;K7EM82;K7ELV3;K7EJ09;K7EKY0	0.96973	H0Y4W0;H0Y6Z9;Q9UBI1	1.0785	J3QKR3;P49720;J3KSM3;J3KRR2	0.94802
P08559-3;P08559;P08559-2;P08559-4;Q5JPU0;Q5JPT9;Q5JPU1	0.99855	M0QZI4;Q8IV08	0.5251	J3QQT2;J3KRX5;P18621;J3QL51;P18621-2;J3QLC8;J3QS96;J3KRB3;J3KSJ0	0.91984	O75534-2;O75534;O75534-3;G5E9Q2;E9PLT0;E9PLD4;E9PNG3;E9PKN4	1.1474	H0Y4Z7;P43155-3;P43155-2;P43155	0.82448	J3QKS9;J3QLQ6;Q9H8H0	0.8911
P08574	0.65025	M0QZK8;O75223;O75223-3;H7BZK5;B8ZZK2	0.61884	J3KS05;P83916;K7ELA4;B5MD17;C9JWS9	1.085	G5E9W7;G5E9V5;P82650;H7C5L9;H7C5F2;Q9H3I1;H7C5H3	0.97009	Q9HDC9-2;H0Y512;Q9HDC9	1.1654	J3QLR7;P62314	2.0086
P08621-2;P08621;M0QYR1;P08621-3;M0QX04;P08621-4	1.1383	M0R0F0;P46782;M0R0R2;M0QZN2	1.0549	J3KS22;Q7Z4W1;J3QS36;J3QL34;J3QS45;J3KRZ4;J3KSZ5;J3QRQ2	0.99258	G5E9W3;Q9UKF6	0.94157	H0Y612;Q9UPN9-2;Q9UPN9	1.1504	J3QLR8;Q9Y3D9	0.95952
P08670;B0YJC4;B0YJC5;Q5JVS8;P17661;Q16352;P07197-2;P07196;E7EMV2;E7ESP9;P07197;P12036-2;P12036	0.91307	M0R192;P30043;M0QZL1	0.80144	J3KS31;O43670-3;O43670-2;O43670;J3QRS9;O43670-4	0.85694	G5E9Z2;Q96KA5-2;Q96KA5	1.4237	H0Y6J1;Q99549;Q99549-2	0.8206	Q07020;J3QQ67;F8VWC5;G3V203;H0YHA7;F8VUA6;F8VYV2;F8VXR6	1.1255
P0CW22;P08708;H0YN88;H0YK46;H0YN73;H3BNC9	0.98428	M0R208;Q16740	2.0512	J3QQY2;J3KS45;Q9UM00-2;Q9UM00;J9JIE6	0.86122	Q92879-5;Q92879-2;Q92879-3;Q92879;Q92879-4;G5EA30;E9PQK4;E9PSH0;E9PKU1;E9PKA1;F5H4Y5;F5H0D8	0.9065	H0Y6Y5;Q13505-3;Q13505	0.87025	J3QRI7;J3QQQ9;J3QQV1;P61254;J3KTJ8;E5RIT6;J3QRC4;Q9UNX3;J3KSS0;E5RHH1;J3KS10	0.96066
P08754	2.8727	M0R210;P62249;M0R3H0;M0R1M5;M0QX76;Q6IPX4	1.2596	J3KS89;K7EQP4;P49748-2;P49748;P49748-3;K7EJW8	0.55483	G5EA52;P30101	0.96045	H0Y746;Q96T76-5;Q96T76-9;Q96T76;Q96T76-8	NaN	J3QRD1;P51648;P51648-2	0.55741
P08758;D6RBL5;E7ENQ5;D6RBE9;E9PHT9;D6RCN3	1.0271	M0R3B2;Q9Y314;M0QX85;M0R1K2	0.77034	P17844;J3KTA4;B4DLW8;J3KRZ1;J3QSF1;J3QRQ7;J3QR02;J3KRX8;J3QRN5	1.0209	P60660-2;G8JLA2;F8W1R7;P60660;J3KND3;G3V1V0;B7Z6Z4;F8VPF3;F8VZV5;F8VZU9;G3V1Y7;F8W180;F8VXL3;F8W1I5;P14649;H0YI43	0.97071	P62158;H0Y7A7;E7ETZ0;E7EMB3;Q96HY3;M0QZ52;G3V361;F8WBR5;G3V226;G3V479;C9J7T9;P27482;P02585	0.96972	J3QRG6;P42771;P42771-4;K7ES20;P42771-2;K7ENC6;P42771-3;G3XAG3;P42772	0.80684
P09132	0.95264	M0R3C3;Q9NZ01;Q9NZ01-2;B3KSQ1;M0QXM3	0.8325	J3QR09;J3KTE4;P84098;J3QL15	1.0882	Q5T6H7;Q9NQW7-2;Q9NQW7;G8JLB2;Q9NQW7-3	0.88443	O43598;H0Y8X4;O43598-2	0.96087	K7EIG7;J3QRN6;O94832	1.607
P09211;A8MX94	0.9542	O00116	0.98337	J3KTF8;P52565;J3QQX2;A8MXW0;J3KRY1;J3KRE2;J3KS60	0.98481	P31943;G8JLB6;E9PCY7;D6RIU0;D6RBM0;E5RGV0;D6RFM3;D6RIT2;H0YB39;E7EQJ0;D6RAM1;D6R9T0;D6RDU3;D6RJ04;D6RIH9;E7EN40;H0YBG7;H0YBD7;D6RDL0;E5RGH4;F5GZT4;D6R9D3;D6RF17;E5RJ94;H0YAQ2	1.0313	Q96EY4;H0Y9X1;D6RA57	1.203	P19105;O14950;J3QRS3;J3KTJ1;P24844;P24844-2	1.0511
P09234	0.82218	O00148;Q8N5M0;B1Q2N1;K7EQN7;K7EPJ3;K7EN69;K7ENP6;F6QWI5;K7EL56;K7EIL8;F6U6E2;F6S2B7;F6SXL5;E7EMX2;K7EN25	2.4142	Q07955;J3KTL2;Q07955-3;Q07955-2;J3KSR8;J3QQV5;J3KSW7	1.0303	G8JLK7;Q9H6R4-4;Q9H6R4;Q9H6R4-2	NaN	H0Y9X2;P48729;P48729-2	0.95455	J3QRZ5;P54578;A6NJA2;B7Z4N8;J3QQT6;J3KS55;H0YA47	0.91237
P09429;Q5T7C4;Q5T7C6;B2RPK0;Q5T7C0;P23497;P0C6E5	1.0086	O00154-6;O00154-4;O00154-5;O00154;B4DUX0;O00154-2;K7EKP8;O00154-3;F5GWE2	1.0653	Q8IWX8;J3QK89	0.70543	H0Y2Y8;Q15942;C9IZ41;H7C3D3;B4DQX7;B4DQR8	0.74395	H0YBL1;P29218;P29218-3;E5RG13;E5RIP7	1.1197	Q9Y570-2;Q9Y570;J3QT22;Q9Y570-3	0.8877
P09661;H0YMA0;H0YKK0;H0YLR3	0.90455	O00186	1.0299	Q9UNZ2;Q9UNZ2-5;J3QK90;Q9UNZ2-6;F2Z2K0;Q9UNZ2-4	1.0621	Q01433-3;Q01433-5;Q01433-2;Q01433-4;H0Y360;Q01433	0.92855	H0YCY8;P53634	1.1152	J3QT28;O43684-2;O43684;B4DDM6;J3QSX4	0.95385
P09874;Q5VX84;Q5VX85	0.95618	O00231;O00231-2;J3QRY4	0.94036	J3QKR3;P49720;J3KSM3;J3KRR2	1.0188	H0Y4J6;P00568;Q5T9B7;H0YID2	0.95658	Q5TC12-2;H0YD21;Q5TC12-3;Q5TC12;I3L448;H0YEW4;I3L1W9;A8MRA7	0.94555	Q8WXC6;J3QT29	NaN
P09936;D6RE83;D6R956;D6R974;D6RF53	0.88013	O00232;O00232-2	0.93237	Q13045-2;J3QLG3;Q13045	0.87141	H0Y4W0;H0Y6Z9;Q9UBI1	1.0901	H0YDP7;Q13405	1.3376	Q03252;J9JID7	1.2354
P09960;P09960-4;P09960-2;P09960-3;B4DEH5	0.94879	O00264;B7Z1L3	0.89801	J3QLR8;Q9Y3D9	0.90588	Q9HDC9-2;H0Y512;Q9HDC9	0.65742	H0YDU8;P53041;A8MU39	0.98349	Q13620-1;K4DI93;Q13620;Q13620-3;A6NE76;Q13619-2;Q13619	1.2993
P09972;K7EKH5;C9J8F3;J3KSV6;J3QKP5;A8MVZ9	0.93213	O00273;O00273-2	0.88873	Q07020;J3QQ67;F8VYV2;F8VWC5;G3V203;H0YHA7;F8VUA6;F8VXR6	1.2246	Q969Q0;P83881;H7BZ11;H0Y5B4;J3KQN4	0.9461	H0YEH2;Q14671-2;Q14671;Q14671-3;Q5T1Z4;Q5T1Z8;H0YDQ6;H0YDK8;E9PR38;E7EWT3;B4DG92	NaN	K7EIN4;K7EQ63;Q13445	1.2338
Q71UI9;P0C0S5;Q71UI9-3;Q71UI9-4	0.84174	O00299	0.95242	J3QRD1;P51648;P51648-2;J3KTD9;I3L2W1;K7EN73;J3QS00;I3L1M4;C9JGJ2;I3L0X1	0.90675	H0Y612;Q9UPN9-2;Q9UPN9;E7EN20	1.0546	H0YFP3;P50336	0.59078	K7EM73;K7EIV0;P04632;K7ELJ7;K7ES82;K7EP80;K7EKD8	0.68296
Q99878;Q96KK5;Q9BTM1;Q16777;Q6FI13;P0C0S8;P20671;Q9BTM1-2;H0YFX9	0.87102	O00410;O00410-3;B4E0R6;H0Y8C6;O00410-2;C9JZD8;C9J875;C9JQT6;E7ESA1;E7ESZ1;E7EWK4;E7EX05;E7EQT5;E7ETV8;E7EV12;E7ETV3;C9JXE0;C9J5I6;C9JMV5;H0Y3V4	1.0754	J3QRG6;P42771;P42771-4;K7ES20;P42771-2;K7ENC6;P42772;P42771-3;G3XAG3	1.0571	H0Y6J1;Q99549;Q99549-2	1.3555	H0YH15;O60306	1.0552	K7EIY6;Q9BV68-2;Q9BV68	1.1299
P10155-3;Q5LJA0;P10155-4;P10155;P10155-2;D6RDN1;D6RE09;H0Y9N5	0.94919	O00425;O00425-2	1.0285	P19105;O14950;J3QRS3;J3KTJ1;P24844;P24844-2	1.0916	H0Y6Y5;Q13505-3;Q13505	0.92265	H0YHI8;O14974-5;O14974-2;O14974	0.90834	K7EJE8;K7EKE6;F5GZ27;Q8N8K8;P36776;K7ER27;K7ER56;K7ERR6	1.0292
P10412;P16402;P22492;P16401	0.4818	O00429-3;O00429;O00429-6;O00429-4;O00429-5;G8JLD5;O00429-2;J3KPI2;B4DGC9;F8VZ52;H0YI79;F8VR28;F8VYL3;B4DPZ9;F8W1W3;F8VUJ9;B4DDQ3	1.047	J3QRZ5;P54578;A6NJA2;B7Z4N8;J3QQT6;J3KS55;H0YA47	1.1845	P62158;H0Y7A7;E7ETZ0;E7EMB3;Q96HY3;M0QZ52;G3V361;F8WBR5;G3V226;G3V479;C9J7T9;P27482;P02585	0.97469	H0YIQ2;P49750-3;P49750;P49750-4	1.1047	Q7Z451;K7EJT8;P63010;P63010-2;K7EJX1;K7EN71;K7ERB2;C9J1E7;Q10567-4	0.88656
P10599;P10599-2	1.0473	O00442;O00442-2	1.2506	J3QSV6;O76021;I3L3U9;I3L3C4;B4DJ58;I3L234	1.1582	O43598;H0Y8X4;O43598-2	0.95867	H0YJV7;P25490;Q96MM3;H0YJU4;O15391	0.97809	O00411;K7EKS3	0.5429
P10606	0.87254	O00487;C9JW37	0.94065	Q9Y570;J3QT22;Q9Y570-2;Q9Y570-3	1.1815	H0YAS9;Q15006	NaN	H0YNG3;H0YK72;P67812;H0YK83;H0YKT4;H0YNX5;H0YNA5;B4DUL4	1.1864	K7EM56;P62841;K7ELC2;K7EJ78;K7EQJ5	0.99057
P10644;K7EM13;K7EPB2;K7ER48	1.8225	O00560-3;O00560;O00560-2;G5EA09;B4DHN5;E9PBU7	9.2249	J3QT28;O43684-2;O43684;B4DDM6;J3QSX4	0.96247	H0YBL1;P29218;P29218-3;E5RG13;E5RIP7	1.0098	P33316-2;H0YNW5;H0YKC5;P33316;H0YMM5;H0YNJ9;H0YKI0;H0Y477;H0YMP1	0.96847	Q3MHD2;Q3MHD2-2;K7ELG9	1.1486
P10768;H7BZT7	0.78833	O00567;H0Y653;H0YDU4;Q5JXT2	1.0258	Q8WXC6;J3QT29	NaN	Q5TC12-2;H0YD21;Q5TC12-3;Q5TC12;I3L448;H0YCA6;H0YEW4;I3L1W9;A8MRA7	1.099	P46779;P46779-2;P46779-3;H0YKD8;C9JB50;G5E9L2;H0YMF4;H0YLP6	1.0755	P14314-2;P14314;K7ELL7;K7EPW7;K7EKX1;K7EJ70	0.9723
P10809;E7EXB4;E7ESH4;B7Z712;C9JL25;C9JCQ4;C9JL19;C9J0S9	1.0404	O00571-2;O00571;B4DXX7;O15523;B4E132;C9J081;B4E3C4;C9J8G5;B4DLA0;H0Y960;D6RCM4;Q9NQI0-3;Q9NQI0-2;D6RDK4;Q9NQI0	0.99846	Q03252;J9JID7	0.9877	H0YDP7;Q13405;E9PNF1	1.3284	Q8N4P3-2;H0YNP9;H0YKT9;Q8N4P3	NaN	K7EM09;K7EPR0;K7ELQ9;Q6UW68	0.56531
P11021	0.98055	O00629;H7C4F6;O00505	0.82496	Q13620-1;K4DI93;Q13620;Q13620-3;Q13619-2;Q13619;A6NE76	1.0399	H0YDU8;P53041;A8MU39	1.0463	H0YKU1;H0YNJ8;Q9NYL9	0.73459	P41567;K7EM18	0.91898
P11142;E9PKE3;P11142-2;E9PNE6;E9PN89;A8K7Q2;E9PLF4;E9PQQ4;E9PQK7;E9PK54;E9PPY6;P54652;E9PN25;E9PM13;E9PI65;E9PS65;E9PSH5	1.037	O00743-2;O00743;O00743-3;B7Z3E2	1.1956	K7EIE8;O95983-2;O95983	0.81347	H0YFP3;P50336	1.0757	H0YMZ1;H0YL69;P25789;H0YN18;H0YMA1;H0YKT8;P25789-2;H0YLC2;H0YMI6;H0YKS0;H0YLS6;H0YMV3	0.96187	K7EP08;K7ENL3;P40763-2;P40763	NaN
P11177-2;P11177;P11177-3;C9J634;F8WF02	1.0044	O00762-2;O00762-3;O00762	0.67024	K7EIJ8;Q8IYT4-2;Q8IYT4;K7EM02	1.1261	H0YHI8;O14974-5;O14974-2;O14974	1.0282	H0YLC7;P16930;Q53XA7	1.0698	K7EP46;P52888;K7EIK4;K7EL32;B3KSE2;K7EL02	0.78011
P11387	0.89042	Q8TB70;O14530;F8WBV5;G3XAJ4;F8WCJ3;B8ZZX4	1.1342	K7EIV0;P04632;K7EM73;K7ELJ7;K7ES82;K7EP80;K7EKD8;K7EK10;Q96L46	1.1928	H0YI92;H0YIA8;Q9NUP9;O14910	0.85711	H0YMB1;Q96TC7-2;Q96TC7	1.1334	K7EPT6;Q92804-2;Q92804;K7EKB2	0.87726
P11388;P11388-2;P11388-3;P11388-4;J3KTB7	0.93715	O14545	0.99163	K7EJE8;K7EKE6;Q8N8K8;P36776;F5GZ27;K7ER27;K7ER56;K7EQF8;K7ERR6	1.0587	H0YKT4;H0YNG3;H0YK72;P67812;H0YK83	1.2208	Q71UM5;H0YMV8;C9JLI6	0.89146	K7EQD9;Q9BRP1	0.98448
P11413;P11413-3;P11413-2;E9PD92;E7EM57;E7EUI8	0.86288	O14561;I3L505;H3BNK3	1.3088	K7EK07;P84243	NaN	P46779;P46779-2;P46779-3;H0YKD8;C9JB50;G5E9L2;H0YLP6;H0YMF4	1.0669	H0YN26;P39687;O43423;H7BZ09;O95626	0.95372	K7ERZ3;K7EQF4;O60664-3;O60664;K7EL96;O60664-2	1.1166
P11766;H0YAG8	0.9785	O14647-2;O14647;H0YJG4;H3BTW3;O14646-2;O14646;Q9HCK8-2;Q9HCK8;Q8TD26;Q3L8U1-2;Q3L8U1-3;Q3L8U1;Q9P2D1	1.5495	K7EKI4;K7ELF1;K7ELQ0;Q9BYD3-2;K7ES61;Q9BYD3	1.3956	H0YLW7;H0YMW8;H0YNF3;H0YMR6;H0YLE6;H0YL55;H7BXE3;Q9NWH9	NaN	H3BLU7;O43488;Q8NHP1;H7C5H7;O95154	1.0182	K7ER14;Q9UHD8-3;Q9UHD8-7;Q9UHD8-2;Q9UHD8-5;Q9UHD8;K7EIR4;K7EKN4;K7EN52;K7ENQ5;K7EJZ2;K7ELJ9;K7ER52;K7EIE4;K7EQD7;K7EJL9;K7EK18;K7EL40;Q9UHD8-4;Q9UHD8-9;Q9UHD8-8	1.1839
P11940;P11940-2;E7EQV3;E7ERJ7;H0YBQ4;H0YAR2;Q9H361;H0YBN4;E5RGH3;E5RH24;E5RJB9;H0YB86;H0YAP2;H3BNY3;Q4VXU2;E5RHG7;H0YAS6;H0YB75;H3BPI5;Q4VY17;H0YAS7;H0YC10;E5RGC4;E5RFD8;H0YEQ8;Q5JQF8;Q96DU9	1.0124	O14654	0.97412	K7EKS1;P36954	0.67007	H0YMZ1;H0YL69;P25789;H0YN18;H0YMA1;H0YKT8;P25789-2;H0YLC2;H0YMI6;H0YKS0;H0YLS6;H0YMV3	0.96835	Q92841;H3BLZ8;Q92841-1;Q92841-3;Q92841-2;C9JMU5;G5E9L5	0.97591	K7ERN2;P32942	NaN
P12004	0.87854	O14737;B4DE64;K7EQA1;K7EL31;K7ESJ4;Q3HM38;K7EPG2	0.90508	K7EM56;P62841;K7ELC2;K7EQJ5;K7EJ78	1.0466	H0YLC7;P16930;Q53XA7	0.96438	Q9H0A8;H3BM91	0.87413	O14579-2;O14579;M0QXB4;M0R061;O14579-3	1.0553
P12236;I7HJJ0	1.1012	O14744-2;O14744;B4DX49;G3V5W5;A8MTP3;B4DV00;G3V580;G3V2L6;C9JSX3;H0YJX6;G3V5L5;H0YJD3;H7BZ44;G3V2X6	0.98982	Q3MHD2;Q3MHD2-2;K7ELG9	1.5196	H0YM70;Q9UL46;H0YKU2	0.95142	H3BV80;Q15287-3;Q15287-2;H3BMM9;H3BTC0;Q15287;H3BR57;H3BPG5;H3BMS0	0.99821	M0QXF7;Q969H8;M0QYN0	1.0641
P12270	1.0892	O14776-2;O14776;G3V220	2.8775	P14314-2;P14314;K7ELL7;K7EPW7;K7EKX1;K7EJ70	0.96287	Q71UM5;H0YMV8;C9JLI6	0.92043	H3BN98;H3BPJ2;F5GXP4;Q15041	NaN	M0R299;M0QXL5;P22087;M0R0P1;M0R2Q4;M0R2U2;M0R1H0;M0R2B0;A6NHQ2	0.94852
P12277;G3V4N7;H0YJG0;G3V461;H0YJK0;G3V2I1	0.97391	O14818;O14818-2;Q5JXJ2;H0Y586;Q8TAA3-2;Q8TAA3-5;Q8TAA3;F5GY34	1.047	K7ELV2;Q96EE3;Q96EE3-1;K7EP88;K7EPZ5;K7ENI5	1.4419	H3BLU7;O43488;Q8NHP1;H7C5H7;O95154	1.0455	P42126-2;H3BP91;P42126;Q96DC0;H3BS70	1.0104	M0QXM4;Q15758;B4DWS4;Q15758-2;M0QX44	0.80848
P12955-3;P12955-2;P12955	0.75225	O14828-2;O14828	1.1802	K7EM11;O14908-2;O14908	1.9444	Q92841;H3BLZ8;Q92841-1;Q92841-3;Q92841-2;C9JMU5;G5E9L5	0.97407	H3BPK3;Q16775-2;Q16775;H3BPQ4;H3BQW8;H3BV79	0.9649	M0QY97;Q9UPT8	0.5434
P12956;B1AHC9;B1AHC8;F5H1I8	1.0408	O14925;Q5SRD1;E7EP42;C9JSY4;E9PB91;B1APJ0	2.3096	P41567;K7EM18	0.80396	H3BM42;Q92896;Q92896-3;Q92896-2	1.1056	H3BPL5;Q96ES7	NaN	M0R1S0;P53680-2;M0QZ21;P53680;M0R0N4;M0QYZ2	NaN
P13010;C9JZ81;H7C0H9	1.1079	O14929-2;O14929	1.8276	Q49A26-5;Q49A26-4;K7EMM8;Q49A26-2;Q49A26-3;Q49A26	NaN	H3BV80;H3BMM9;H3BTC0;Q15287;Q15287-3;Q15287-2;H3BR57;H3BPG5;H3BMS0;H3BRK4;H3BTV0;H3BNI3;H3BP82;H3BTR6;H3BUG0;H3BTY0;H3BNU7;H3BUL0	1.0459	H3BPR2;Q13232	0.94134	M0R050;Q9NQT4	NaN
P13489;E9PMJ3;E9PLZ3;E9PIM9;E9PIK5;H0YCR7;E9PMA9;E9PMN0	1.2249	O14949	1.5062	K7ENR6;Q969U7	1.0771	H3BN72;H3BNV9;P13073;Q86WV2;H3BPG0;H3BNI5	0.96889	H3BQQ2;Q86UK7-2;Q86UK7-3;Q86UK7	1.0176	M0R0F0;P46782;M0R0R2;M0QZN2	1.0903
P13639	1.0828	O14979-3;O14979-2;O14979	1.1	K7ENW5;K7ES52;K7ERJ1;P04183;K7ERV3	0.78965	H3BN98;H3BPJ2;F5GXP4;Q15041	1.0338	H3BQZ7;Q1KMD3	0.99282	M0R0Y2;P54920;M0R213;Q4G0M0;B4DK44;M0R2M1;Q9H115	0.72453
P13667;C9JMN9	0.89423	O14980;C9JKM9;C9J673;C9IZS4;C9JQ02;C9JV99;F8WF71;C9JF49;C9IYM2;H7BZC5	1.0604	K7EPJ1;Q16763	0.71169	H3BPY0;H3BNT2;O75208	NaN	H3BR50;P27449	0.99111	M0R192;P30043;M0QZL1	1.0046
P13693;Q5W0H4;Q8TBK7;Q56UQ5;J3KPG2;E9PJF7;H0YCX0	1.0257	O15042-2;O15042;E7ET15;O15042-3;C9JDJ7;C9J5L1;E7EW00;H0Y8D9;C9JB80;H7C4V2	1.0627	K7EQ60;Q13057;Q13057-2	1.0314	P42126-2;H3BP91;P42126;Q96DC0;H3BS70	1.1656	H3BRL3;O14562;H3BUM8	0.71293	M0R208;Q16740	0.83874
P13797;B7Z6M1;B4DGB4;F8W8D8;B4DI60;H7C4N2;P13796;Q14651;C9JAM8;Q5TBN3	0.94607	O15067;F5GWT9;J3KTQ5;J3KTL4;J3KT98;J3QSG0;J3QSH6;H0YGH1	1.2669	K7ERZ3;K7EQF4;O60664-3;O60664;K7EL96;O60664-2	0.95438	H3BPK3;Q16775-2;Q16775;H3BPQ4;H3BQW8;H3BV79	0.96567	Q969X6-2;Q969X6;H3BSH7	0.79967	M0R210;P62249;M0R3H0;M0QX76;M0R1M5;Q6IPX4	1.3091
P13804;P13804-2;H0YL12;H0YLU7;H0YKF0;H0YK49;H0YNX6;J3KN60;H0YL83	0.84139	O15116;E5RJ47;E5RH18	1.3492	K7EQQ8;Q9NXH9-2;Q9NXH9;K7EQY6;K7ENI9;K7ERR5;K7EQU7	1.0579	H3BQ23;H3BUG4;H3BV90;H3BT65;Q6FI81-3;Q6FI81	1.0086	H3BUG4;H3BV90;H3BT65;Q6FI81-3;Q6FI81;H3BQ23;H3BPG7	1.0184	P28340;M0R2B7;M0QXE6;M0QXQ2;M0R3H8;M0QZR8	0.62771
P14174	0.99509	O15127;H3BV04;H3BN93;H3BUB6;H3BPL9	1.9568	K7ERC2;Q9NY61	0.77364	H3BQQ2;Q86UK7-2;Q86UK7-3;Q86UK7	0.989	H3BUR4;Q9ULX3	NaN	M0R389;Q15102;M0QXS6;M0R323;M0QZT2;M0R1K3	0.91961
Q5T621;P14550	0.89827	O15143;F8VXW2;C9JM51;F8WEB3;C9JTT6;C9JBJ7;C9K057;C9J4Z7;C9JEY1;C9JQM8;C9JFG9;C9J6C8;F8WCG3	0.79266	K7ERT7;Q99536	0.7504	H3BQZ7;Q1KMD3	0.99718	H3BUU5;P08047	0.98484	M0R3B2;Q9Y314;M0QX85;M0R1K2	1.0565
P14618;P14618-3;P14618-2;H3BTN5;Q504U3;H3BQ34;H3BSU3;H3BUW1;H3BTJ2;H3BT25;H3BU13;H3BN34;H3BQZ3;P30613-2;P30613	0.97873	O15144;H7C3F9	1.2003	K7ES02;Q13867;J3KS79;K7ENH5;K7ESE8;J3KSD8;E7EMN3	1.0216	H3BR50;P27449	NaN	Q7Z2W9-2;H3BUY0;Q7Z2W9	1.1519	M0R3C3;Q9NZ01;Q9NZ01-2;B3KSQ1;M0QXM3	0.93898
P14625;F8W026;H0YIV0;Q58FF3	0.97212	O15145;C9JZD1;F8VR50	0.93636	P50570-2;K7ESI9;P50570;P50570-3;F5H4R9;E9PEQ4;K7EPK9;E5RIK2;Q6P2G1;E5RHK8;Q05193-5;Q05193-3;Q05193-4;Q9UQ16-2;Q9UQ16-3;Q05193-2;Q05193;Q9UQ16;Q9UQ16-4	0.95616	H3BRL3;O14562;H3BUM8	0.8827	H7C2Z6;H7BXD5;P28676	NaN	O00116	1.164
P14868;Q68CR9;H7BZ35;C9J7S3;C9JLC1;H7C278;C9JQM9	1.1217	O15212;A2AB88	0.98411	M0QX71;Q9BQ67	0.8644	H3BRV9;P61970;J3QS01	0.99659	Q5H909;Q9UNF1-2;H7BXW3;Q9UNF1;Q5H907	0.71746	O00148;Q8N5M0;B1Q2N1;K7EQN7	1.1959
P15121;E9PCX2;C9JRZ8-2;C9JRZ8	1.0075	O15260-2;Q5T8U5;Q5T8U7;O15260;B7Z6A4	0.93153	M0QX85;M0R1K2;M0R3B2;Q9Y314;M0R1T7	0.94266	H3BRY5;P50225;E9PKW4;P50224;P50226;Q1ET66;H3BNY7;H3BQX5;E9PKR8;P50224-2;P50225-2;E9PM76	0.88454	Q9Y5U8;H7BXW7	1.1931	O00151	1.1736
P15374;Q5TBK7	1.071	O15355	1.0368	O14579-2;O14579;M0QXB4;M0R061;O14579-3	1.0553	Q969X6-2;Q969X6;H3BSH7	1.1497	Q7L2E3-3;H7BXY3;Q7L2E3;Q7L2E3-2	0.98352	O00154-6;O00154-4;O00154;O00154-2;B4DUX0;O00154-3;O00154-5;K7EKP8;F5GWE2	0.98229
P15531;P15531-2	1.0416	O15479	1.0922	M0QXF7;Q969H8;M0QYN0	1.0321	H3BT58;Q14019	0.94458	P22061;P22061-2;J3KP72;H7BY58;B7Z972;F8WDT3;F8WAV5;F8WAX2;H7C4X2;C9J0F2	0.92909	O00170	0.876
P15880;H0YEN5;E9PQD7;E9PMM9;I3L404;E9PPT0;E9PM36;H3BNG3;H0YE27	1.0454	O43143;F5H658;Q14562	1.0921	M0QXM4;Q15758;B4DWS4;Q15758-2;M0QX44	0.73781	H3BUR4;Q9ULX3	0.9453	Q5T7U1;Q9Y5Q8-2;H7BY84;Q9Y5Q8;Q9Y5Q8-3	0.77436	O00186	NaN
P16152;B4DFK7;E9PQ63;A8MTM1;O75828	0.97479	O43172-2;O43172	0.95568	Q96B54;M0QXZ5	0.86496	H3BUU5;P08047	0.96869	Q5JRG1;Q9BVL2-2;H7BYF2;Q9BVL2-3;Q9BVL2	0.73699	O00231;O00231-2;J3QRY4;J3QS13	0.95299
P16403	0.40122	O43175;Q5SZU1	0.91334	M0QY97;Q9UPT8	0.7918	Q5H907;Q5H909;Q9UNF1-2;H7BXW3;Q9UNF1	0.80868	P17096;P17096-3;H7BYM6	0.62142	O00232;O00232-2	0.9012
P16615;H7C5W9;P16615-5;P16615-2;P16615-3;P16615-4;F8VSH0	0.92878	O43242;B4DT72;H0YGV8	0.98155	M0QZK8;O75223;O75223-3;H7BZK5;B8ZZK2	0.98161	Q9Y5U8;H7BXW7	0.96956	H7BZJ3	0.94482	O00264;B7Z1L3	0.92114
P16949;A2A2D0;P16949-2;B7Z2Z7;Q9H169;G5EA16;Q9H169-2;E5RIR6;E7EVN3	0.99397	O43290	0.64849	M0R0F0;P46782;M0R0R2;M0QZN2	1.0592	Q7L2E3-3;H7BXY3;Q7L2E3;Q7L2E3-2	0.89401	P61956-2;P61956;H7BZT4;Q6EEV6;P55854;A8MUA9;B4DUW4;A8MU27	0.96746	O00267-2;O00267	0.90606
P16989-2;P16989;P16989-3;Q9Y2T7	0.66247	O43390;Q2L7G6;O43390-2;E7ETM7	1.0146	M0R0Y2;P54920;M0R2M1;M0R027;M0R058;M0R0I4;Q4G0M0;B4DK44;Q9H115;M0R213	1.1936	P22061;P22061-2;J3KP72;H7BY58;B7Z972;F8WDT3;F8WAV5;F8WAX2;H7C4X2;C9J0F2	0.92947	H7C0D0;Q16850-2;Q16850	1.3075	O00273-2;O00273;K7ERT1	0.97676
P17066;P48741	0.99791	O43399;O43399-5;Q5JWU6;O43399-2;O43399-4;O43399-3;O43399-6	0.83041	M0R208;Q16740;M0QYV5	1.7832	Q9Y5Q8-2;H7BY84;Q9Y5Q8;Q9Y5Q8-3;Q5T7U4;Q5T7U1	NaN	H7C131;P09110-2;P09110;B4DVF4;H0Y4D4;C9JDE9	0.73918	O00299	0.89818
P17812;B4DR64;B7Z9C4;Q9NRF8	0.87193	O43447;H0YEL5;A6NNE7;C9JQD4	0.84097	M0R210;P62249;M0R3H0;M0R1M5;M0QX76;Q6IPX4	1.288	Q5JRG1;Q9BVL2-2;H7BYF2;Q9BVL2-3;Q9BVL2	0.78811	P61966;H7C1E4	NaN	O00410;O00410-3;H0Y8C6;B4E0R6;O00410-2;E7EWK4;E7EX05;E7EQT5;E7EV12;E7ETV3;C9JZD8;C9J875;C9JQT6;E7ESA1;E7ESZ1;E7ETV8;C9JMV5;H0Y3V4;C9JXE0;C9J5I6;C9JZ53	1.0431
P17858;P17858-2	1.0775	O43491;O43491-2;E9PII3;O43491-3;E9PK52;E9PPD9;E9PHY5;Q6ZSX4;Q6R5J7;E9PJP4;E9PPC9;E9PQN0;J3KT37;E9PRG1;E9PIG0;E9PQD2;E9PMG5;E9PN54;E9PMV8;H0Y5B0;Q9Y2J2-3;Q9Y2J2-2;F5GX05;Q9Y2J2	1.1123	Q92797-2;M0R3C7;Q92797;M0R1C2;M0R180;M0QXP5	0.75706	P17096;P17096-3;H7BYM6	0.63317	H7C1F6;P30042;P30042-2;H7C2G3;H7C455;F2Z2Q0;H7BYH1	1.0096	O00422;H7BZW6	0.91143
P17980;E9PM69;E9PKD5;E9PN50;E9PMD8;E9PRB8;E9PLQ8;E9PS45;E9PLG2	1.0755	O43583;F8VVL1	1.0135	O00116	0.94757	H7BZJ3	0.95397	Q99848;H7C2Q8	0.94495	O00425;O00425-2	0.98647
P17987;E7EQR6;F5H282;E7ERF2;F5GZ03;F5GZI8;F5H136;F5H676;F5GYL4;F5H726;F5H7Y1	0.9755	O43615;M0QXU7;M0R301;M0QXM9;M0R124	1.0415	O00148;Q8N5M0;B1Q2N1;K7EQN7;K7EPJ3	1.0134	P61956-2;P61956;H7BZT4;Q6EEV6;P55854;A8MUA9;B4DUW4;A8MU27	0.96252	H7C3P6;P52948-6;P52948-2;P52948-5;P52948;H0YCT1;H0YDF4;J3KP29	0.87778	O00429-3;O00429;O00429-6;O00429-4;O00429-5;G8JLD5;O00429-2;J3KPI2;B4DGC9;F8VZ52;H0YI79;F8VR28;F8VYL3;B4DPZ9;F8W1W3;F8VUJ9;B4DDQ3	0.95163
P18206-2;P18206;P18206-3;B4DTM7;Q5JQ13	0.87842	O43681	1.0612	O00151	0.9508	H7C0D0;Q16850-2;Q16850	1.5912	H7C492;Q9Y276;H7BZF6	0.84033	O00442;O00442-2;A6NIC1	1.3064
P18669;P15259;Q8N0Y7	0.97404	O43707;D6PXK4;F5GXS2;H7C144;K7EJH8;K7EP19	1.0188	O00154-4;O00154-6;O00154;O00154-2;O00154-3;O00154-5;B4DUX0;K7EKP8;F5GWE2;Q6ZUV0	0.96761	P61966;H7C1E4	NaN	H7C4H2;Q9Y5M8	0.9856	O00487;C9JW37	0.84718
P18859;P18859-2	0.8187	O43719;Q5H919;Q5H918	1.145	O00170;E9PMH2;E9PPD7	0.9361	Q99848;H7C2Q8	1.0178	P46736-4;P46736-2;P46736-3;P46736;H9KVA9	0.73317	O00560-3;O00560;B4DHN5;E9PBU7;O00560-2;G5EA09	0.62127
P19338;H7BY16;C9JYW2;C9JLB1;C9J1H7;C9JWL1	0.99627	O43765;K7EMD6;K7ERW5	0.91164	O00178	0.62313	H7C3P6;P52948-6;P52948-2;P52948-5;P52948;J3KP29;H0YDF4	1.1718	I3L0Q0;I3L2Q4;P62253	0.9575	O00567;H0Y653;H0YDU4;Q5JXT2	1.0146
P19387	0.90192	O43776;B4DN60;K7EQ35;K7EMQ6;K7EIU7;K7EPK2;B4DG16;K7EJ19	0.96202	O00186	0.95611	H7C492;Q9Y276;H7BZF6	0.82622	I3L1P5;O14964-2;O14964	0.80472	O00571;O00571-2;B4DXX7;O15523;B4E132;B4E3C4;B4DLA0;C9J081;C9J8G5;H0Y960;D6RCM4;Q9NQI0-3;Q9NQI0-2;D6RDK4;Q9NQI0	0.99283
P19388	0.83895	O43809;H3BV41;H3BND3	0.80213	O00231;O00231-2;J3QRY4	0.89851	H7C4H2;Q9Y5M8	0.69892	I3L1P8;Q02978;F5GY65	1.055	O00629;H7C4F6	0.70327
P19623;K7EL89;K7EKM4	1.0121	O43837-2;O43837;O43837-3	1.0431	O00232;O00232-2	0.96406	H7C5L1;Q9H7Z7	NaN	Q96CP2;I3L1Y9;I3L4I0	0.9258	O00743-2;O00743;O00743-3;B7Z3E2;Q5T1S7	0.97976
P20042	0.7235	O43852;O43852-3;O43852-2;O43852-4;H0Y875;O43852-15;O43852-5;O43852-13;O43852-14;O43852-9;O43852-11;O43852-10;O43852-6;O43852-12;O43852-7;O43852-8	0.97269	O00264;B7Z1L3;O15173	1.0165	H9KV68;H0Y3Y0;Q5T7U0	0.95413	P46108-2;I3L297;P46108	0.8515	O00764;F2Z2Y4;O00764-2;A8MV33;O00764-3	0.7548
P20618	0.7675	O43865-2;O43865;Q96HN2-4;Q96HN2-3;D7UEQ7;H0Y8B3;F8W7N8;Q96HN2-2;Q96HN2	0.96734	O00267-2;O00267;M0QYL9	1.0133	M0R2V8;H9KV91;Q96B36	1.2872	I3L2B0;K7EIG1;O75153	0.98664	O14525-2;O14525	0.86018
P20700;E9PBF6	1.0333	O60220	1.0275	O00273;O00273-2	0.97133	P46736-4;P46736-2;P46736-3;P46736;H9KVA9	0.71582	I3L397;P63241;I3L504;P63241-2;Q6IS14;F8WCJ1;C9J7B5;C9J4W5;Q9GZV4	1.0555	Q8TB70;O14530	0.90463
P20962	1.0595	O60264;F6TQG2;P28370-2;P28370	1.0236	O00299	0.87586	Q6Y7W6-4;Q6Y7W6;Q6Y7W6-3;I1E4Y6;F8WCD5;C9JPV7;C9JXQ0;C9J0V6;C9JHT0;C9JRZ2;C9JH18;C9JHW1;E7ESB6;E9PC50	0.75033	I3L4J1;Q9UN37;O75351;Q6PIW4-2;Q6PIW4	0.84702	O14561;I3L505;H3BNK3	1.0372
P21266	0.84221	O60266;H7C1A6;C9JLX3;B3KT86	0.95295	O00410;O00410-3;B4E0R6;H0Y8C6;O00410-2;C9JZD8;E7EQT5;E7ETV3;C9J875;C9JQT6;E7ESA1;E7ESZ1;E7EWK4;E7EX05;E7ETV8;E7EV12;C9JXE0;C9J5I6;C9JMV5;H0Y3V4;O60518	1.0469	I3L0Q0;I3L2Q4;P62253	1.1038	P35613-2;I3L4S8;P35613;I3L192;P35613-3;P35613-4	0.98697	O14654	0.90536
P21333-2;P21333;Q5HY54;F8WE98;E9PHF0;H0Y5F3;H0Y5C6	1.0103	O60271-9;O60271-4;O60271;O60271-5;O60271-3;O60271-2	1.2109	O00422;H7BZW6	0.96946	Q6PK04;I3L0U5	0.76258	I3L531;P53384-2;P53384	0.82618	O14737;K7EQA1;K7EL31;B4DE64;K7ESJ4;Q3HM38;K7EPG2	0.96862
P21796;C9JI87	1.0132	O60493-3;O60493-2;O60493-4;O60493	NaN	O00425;O00425-2;F8WD15	1.0539	I3L159;I3L1F5;P30519;I3L276;I3L4P8;I3L463;I3L430	0.97934	J3KMY7;Q9GZT3;H0YJ40;G3V4X6;G3V2S9;H0YJW7;H0YJ07;H0YJU7;H0YJI1	1.1125	O14744-2;O14744;B4DX49;G3V5W5;G3V580;A8MTP3;G3V5L5;G3V2L6;C9JSX3;H0YJX6;B4DV00;G3V2X6;G3V5T6;H0YJ77	0.937
P21912	0.95038	O60506-4;O60506-3;O60506-2;O60506;O60506-5;F6UXX1	1.0529	O00429-3;O00429;O00429-6;O00429-4;O00429-5;G8JLD5;O00429-2;J3KPI2;B4DGC9;B4DPZ9;F8W1W3;F8VUJ9;F8VZ52;H0YI79;F8VR28;F8VYL3;B4DDQ3	0.99977	I3L1P8;Q02978;F5GY65	1.0568	Q9P0J0;J3KN00;B4DEZ3;K7EJE1;B4DF76;E7ENQ6	0.91271	O14776-2;O14776;G3V220	1.1476
P22087;M0R0P1;M0R299;M0QXL5;M0R2Q4;M0R2U2;M0R1H0;M0R2B0;A6NHQ2	1.0318	O60678-2;O60678	0.97599	O00442;O00442-2;A6NIC1	0.88844	Q96CP2;I3L1Y9	NaN	Q5VYK3;J3KN16;Q5VYK5	1.012	O14818;O14818-2;H0Y586;Q8TAA3-2;Q8TAA3-5;Q8TAA3;Q5JXJ2;F5GY34	0.95921
P22102;P22102-2;B4DJ93;C9JBJ1;C9JTV6;F8WD69;C9JZG2;C9JKQ7;H7C366;H7C489;H7C5I9	0.93714	O60684;F5H4G7;F5GYL8;O15131	0.63906	O00479	1.1769	I3L2B0;K7EIG1;O75153	0.96591	J3KN29;O00233;F5H5V4;F5GX23;F8W7V8;O00233-2;F5H169;F5H182;F5H7X1;O00233-3	0.96393	O14828-2;O14828	0.63999
P22234;E9PBS1;P22234-2;D6RF62	0.97597	O60701-3;O60701-2;O60701	1.0369	O00487;C9JW37	0.98405	I3L2C5;Q9P2R3;Q9P2R3-2;Q9P2R3-4	1.474	Q9UKL0;J3KN32;H0YF22;Q9P2K3-4;Q9P2K3;Q9P2K3-3	1.078	O14925;Q5SRD1;E7EP42;C9JSY4;E9PB91;B1APJ0	2.418
P22314;Q5JRR9;Q5JRS0;Q5JRR6;Q5JRS1;Q5JRS3;Q5JRS2	0.93706	O60763;O60763-2;F5GZ76;F5H4X1;F5GYR8;H0Y7C0	0.92824	O00505;H0Y4S9	0.37306	I3L2C7;P57678	NaN	Q5JPE7-2;Q15155;P69849;Q5JPE7;J3KN36;Q4G177;F5H826;H3BUC9	1.097	O14929-2;O14929	1.136
P22392-2;Q32Q12;P22392;J3KPD9;E7ERL0;F6XY72;O60361;E5RHP0;C9K028	1.0239	O60832-2;O60832;H7C0M1;C9IYT0;H7BZF2;H7C2Q9;H7C2Q2	1.0464	O00560;O00560-3;O00560-2;G5EA09;B4DHN5;E9PBU7	0.98769	I3L397;P63241;I3L504;P63241-2;Q6IS14;F8WCJ1;C9J7B5;C9J4W5;Q9GZV4	1.0616	J3KN66;E9PKD1;Q5JTV8;H0YD16;H0Y4R4;H0YDU3;Q5JTV8-2	0.92254	O14949	1.202
P22626;P22626-2	1.0621	O60841	1.7623	O00567;H0Y653;H0YDU4;Q5JXT2	0.84357	P35613-2;I3L4S8;P35613;I3L192;P35613-3;P35613-4	0.99365	Q96GX9;J3KN82;Q96GX9-3	0.84913	O14979-3;O14979-2;O14979	1.1657
P23246;P23246-2;H0Y9K7;H0Y9U2	1.056	O60869-2;O60869	1.0707	O00571;O00571-2;B4DXX7;O15523;B4E132;B4E3C4;B4DLA0;C9J081;C9J8G5;H0Y960;D6RCM4;Q9NQI0-3;Q9NQI0-2;D6RDK4;Q9NQI0	0.97488	I3L531;P53384-2;P53384	1.2166	O15027-2;O15027-4;O15027-3;O15027;O15027-5;J3KNL6	0.98293	O14980;C9JKM9;C9J673;C9IZS4;C9JQ02;C9JV99;F8WF71;C9JF49;C9IYM2;H7BZC5	1.041
P23284	0.96815	O60884;H3BMW5	1.3549	O00629;H7C4F6	1.0454	J3KMY7;Q9GZT3;H0YJ40;G3V4X6;G3V2S9;H0YJW7;H0YJ07;H0YJU7;H0YJI1	1.0643	Q9UJV9;J3KNN5	0.97723	O15067;F5GWT9;J3KTQ5;J3KT98;H0YGH1	0.92657
P23381;P23381-2;G3V277;G3V423;G3V3P2;G3V227;G3V5U1;G3V456;G3V3H8;G3V3Y5;G3V2F2;G3V3R3;G3V4S4;G3V313;G3V339;G3V2C0;G3V4C7;G3V4N8;G3V5W1;G3V3S7;G3V3X0;G3V2Y7;H0YJP3	0.90128	O60925;E5RGS4;D6RGG5	0.8508	O00743;O00743-3;O00743-2;Q5T1S7;B7Z3E2	1.2457	Q9P0J0;J3KN00;B4DEZ3;K7EJE1;B4DF76;E7ENQ6	0.98756	P27448-8;P27448-3;P27448-4;P27448-2;P27448;J3KNR0	1.3001	O15116;E5RJ47;E5RH18	0.95206
P23396;J3KN86;E9PL09;E9PPU1;E9PL45;F2Z2S8;H0YCJ7;H0YEU2;H0YF32;E9PQ96;E9PJH4;E9PK82;E9PSF4;E9PQX2;H0YES8	1.0618	O75083;D6RD66;O75083-3	1.0471	O00762-2;O00762-3;O00762	0.71919	Q5VYK3;J3KN16;Q5VYK5	1.0475	J3KNU8;Q02252;G3V4Z4	1.1182	O15143;F8WCG3;F8VXW2;C9JM51;F8WEB3;C9JTT6;C9JBJ7;C9K057;C9J4Z7;C9JEY1;C9JQM8;C9JFG9;C9J6C8	1.3218
P23526;P23526-2	0.9864	O75131;E5RG68;H0YB26;E5RHZ0;E5RJ85;E5RFT7;E5RG97;Q86VY2;Q7Z6C8;Q719H8;Q96FN4;E7ENV7;Q8IYJ1;Q96A23;O95741;Q9UBL6-2;Q86YQ8;Q96A23-2;Q9HCH3;F5GXN1;Q9UBL6	1.0072	O00764-2;O00764;F2Z2Y4;A8MV33;O00764-3	1.0233	Q5JPE7-2;Q15155;P69849;Q5JPE7;J3KN36;Q4G177;F5H826;H3BUC9	1.0735	P04637-5;P04637-6;P04637-2;J3KP33;P04637-3;P04637-4;P04637;E7ESS1;P04637-8;P04637-9;P04637-7;E7EMR6;E7EQX7;E9PCY9;E9PFT5	0.95786	O15144;H7C3F9;G5E9S7;C9JTV5;G5E9J0	0.99398
P23528;G3V1A4;E9PP50;E9PK25;E9PQB7;E9PLJ3;E9PS23	0.94683	O75306-2;O75306;B7Z9L2	0.87175	O14545	0.66329	J3KN66;H0Y4R4;E9PKD1;Q5JTV8	1.1124	O95232;J3KPP4;B4DJ96;D6RDI2;D6RHH0;H7C5U7;O95232-2;C9JL41;H0YA81	0.9357	O15145;C9JZD1	0.90965
P24534;F2Z2G2;C9JZW3;F8WF65	1.0784	O75340-2;O75340;H0Y9X3;H0Y9N1	0.75505	O14561;I3L505;H3BNK3	1.1403	Q96GX9;J3KN82;Q96GX9-3	1.1505	J3KPV4;P33991;E7ER43;E5RG31;E5RK04;E5RHP5;E5RFJ8	1.03	O15212;A2AB88	1.0089
Q5QNZ2;P24539	0.78855	O75348;C9JYK3;O95670-2;F2Z307;O95670;C9JRT2	1.0424	O14654	1.0188	O15027-2;O15027-4;O15027-3;O15027;O15027-5;J3KNL6	1.132	P25325;J3KPV7;B1AH49	0.99586	O15260-2;Q5T8U5;Q5T8U7;O15260;B7Z6A4	1.0567
P24752;G3XAB4;H0YEL7;E9PRQ6;E9PKF3	0.95092	O75367-2;O75367-3;O75367;D6RCF2;B4DJC3	0.76507	O14737;B4DE64;K7EQA1;K7EL31;K7ESJ4;Q3HM38;K7EPG2	0.98286	Q9UJV9;J3KNN5	0.80636	Q99623;J3KPX7;F5GY37;Q99623-2;B4DW05;F5GWA7;F5H3X6;F5H0C5;F5H2D2;F5H0S4	1.0103	O15294	0.74093
P25205;B4DWW4;J3KQ69;Q7Z6P5	1.0453	O75369-6;O75369-3;O75369-2;O75369-9;O75369;O75369-8;O75369-5;O75369-4;E7EN95;O75369-7	1.0023	O14744;O14744-2;G3V5W5;G3V580;B4DX49;G3V2L6;A8MTP3;G3V5L5;C9JSX3;B4DV00;G3V2X6;H0YJX6;G3V507;G3V2F5;H0YJD3;H7BZ44	0.98224	J3KNU8;Q02252	1.0063	Q16836;J3KQ17;Q16836-2;E9PF18	1.0599	O15355	0.93887
P25398	1.0853	O75396	1.1006	O14776-2;O14776;G3V220	1.288	P04637-5;P04637-6;P04637-2;J3KP33;P04637-3;P04637-4;P04637;E7ESS1;P04637-8;P04637-9;P04637-7;E7EQX7;E9PFT5;E7EMR6;E9PCY9	0.94497	Q9NTK5;J3KQ32;Q9NTK5-2;Q9NTK5-3;C9JCJ9;C9JTK6	1.009	O15400-2;O15400	NaN
P25705-2;P25705;K7ENP3;K7EK63;K7EK77;K7EJP1;K7EQT2;K7ERX7;K7ENJ4;K7EKV9;K7ESA0	0.99311	O75400-2;O75400-3;O75400	0.94646	O14818;O14818-2;H0Y586;Q5JXJ2;Q8TAA3-2;Q8TAA3-5;Q8TAA3;F5GY34	0.97882	O95232;J3KPP4;B4DJ96;D6RDI2;D6RHH0;H7C5U7;O95232-2;C9JL41;H0YA81	1.0595	Q9Y3E5;J3KQ48	0.99562	O15479	1.0665
P25786;P25786-2;F5GX11;B4DEV8	0.8698	O75436;G3V1N8;O75436-2;F5H4L7	1.8499	O14828-2;O14828	1.1554	O60830;J3KPV3	2.2097	Q14318;Q14318-2;J3KQ73;C8C9T5;M0R2K9	NaN	O15511;O15511-2;B1ALC0	1.0185
P25787;H7C402;H3BT36;C9JCK5	0.89045	O75438;O75438-2	0.97083	O14925;Q5SRD1;C9JSY4;E7EP42;E9PB91;B1APJ0	1.4244	J3KPV4;P33991;E7ER43;E5RG31;E5RK04;E5RHP5;E5RFJ8	1.0311	J3KQG4;P04062-2;P04062	0.71725	O43143;F5H658;Q14562	1.0551
P25788-2;P25788	0.97679	O75439;E7ERZ4;G3V0E4	0.94862	O14929;O14929-2;F8WEW1;F8W9G7	0.98386	Q99623;J3KPX7;F5GY37;Q99623-2;B4DW05;F5GWA7;F5H3X6;F5H0C5;F5H2D2;F5H0S4	0.99202	P15170-2;J3KQG6;P15170;H3BR35;Q8IYD1;H3BSV8	1.0755	O43172-2;O43172	0.75789
P26038	1.0372	O75475;O75475-3;O75475-2;H3BPQ6;Q9Y3E1	0.99475	O14949	1.3997	Q16836;J3KQ17;Q16836-2;E9PF18	1.0787	Q969Q0;P83881;J3KQN4;H7BZ11;H0Y5B4	0.94061	O43175;Q5SZU1	0.88748
P26196	1.0951	O75489;B4DFM8;E9PS48	3.5454	O14979-3;O14979-2;O14979	1.1127	Q9NTK5;J3KQ32;Q9NTK5-2;Q9NTK5-3;C9JCJ9;C9JTK6	1.0028	M0QY17;Q9NWV8-3;M0R3F4;M0R2A4;M0R2K3;M0R193;M0R0I0;M0R2I2;M0QX07;Q9NWV8;J3KQS6	0.89329	O43242;B4DT72;H0YGV8	0.93951
P26373;P26373-2;J3QSB4;H3BTH3;J3KS98;H3BUK8	0.95419	O75494-5;Q5JRI1;O75494-4;O75494-6;O75494-3;O75494-2;O75494;Q8WXF0	0.95199	O14980;C9JKM9;C9J673;C9IZS4;C9JQ02;C9JV99;F8WF71;C9IYM2;H7BZC5;C9JF49	1.0071	Q9Y3E5;J3KQ48	0.96525	Q9BTW9-5;Q9BTW9;J3KR97;Q9BTW9-4;I3L4D2;I3L1S3;I3L3H4;I3L131;I3L143;I3L0V3;I3L163;I3L500;I3L439	1.6566	O43290;E9PQI8	0.83518
P26583;D6R9A6	0.86552	O75531	0.97327	O15042-2;O15042;E7ET15;E7EW00;H0Y8D9;O15042-3;C9JDJ7;C9J5L1;C9JB80;H7C4V2	0.98999	Q14318;Q14318-2;J3KQ73;C8C9T5;M0R2K9	0.96252	J3KRR0;J3QQM5;Q9BT23	1.0961	O43390;Q2L7G6;O43390-2;E7ETM7	0.98857
P26599;P26599-2;P26599-3;A6NLN1;K7EKJ7;K7ES59;K7ELW5;K7EK45;Q9UKA9;Q9UKA9-2;Q9UKA9-4;Q9UKA9-3;B4DSS8	0.95808	O75533;H7C341;F8WC19;O75533-2;B4DGZ4	1.0241	O15067;F5GWT9;H0YGH1;J3QSG0;J3QSH6;J3KTQ5;J3KTL4;J3KT98	1.096	P15170-2;J3KQG6;P15170;H3BR35;Q8IYD1;H3BSV8	1.0292	J3QQT2;J3KRX5;P18621;J3QL51;P18621-2;J3QLC8;J3QS96;J3KRB3;J3KSJ0	0.95016	O43399;O43399-5;Q5JWU6;O43399-2;O43399-4;O43399-3;O43399-6	0.90986
P26639;P26639-2;E7ERI3;G3XAN9;D6RCA5;D6R9F8;D6RDJ6;D6RBR8;A2RTX5-2;B7ZLP8;A2RTX5;D6RJ97;D6RHV7;D6RCS6	0.99023	O75607	1.1276	O15116;E5RJ47;E5RH18	1.1168	P31327-2;P31327;J3KQL0	NaN	J3KS05;P83916;K7ELA4;B5MD17;C9JWS9	0.96431	O43491;O43491-2;E9PII3;O43491-3;E9PK52;E9PPD9;E9PHY5;Q6ZSX4;H0Y5B0;E9PJP4;E9PPC9;E9PQN0;J3KT37;E9PRG1;E9PIG0;E9PQD2;E9PMV8;Q6R5J7	0.88466
P26641;B4DTG2;E7EMT2	1.0285	O75629	1.0494	O15127;H3BV04;H3BN93;H3BUB6;H3BPL9	1.9292	M0QY17;Q9NWV8-3;M0R3F4;M0R2A4;M0R2K3;M0R193;M0R0I0;M0R2I2;M0QX07;Q9NWV8;J3KQS6	0.89358	J3KS22;Q7Z4W1;J3QS36;J3QL34;J3QS45;J3KRZ4;J3KSZ5;J3QRQ2	0.97599	O43583;F8VVL1	0.85636
P27348;E9PG15	1.0353	O75643;O75643-2;C9JAQ9;B4E0P5	1.0633	O15143;F8WCG3;F8VXW2;C9JM51;F8WEB3;C9JTT6;C9JBJ7;C9K057;C9J4Z7;C9JEY1;C9JQM8;C9JFG9;C9J6C8	1.5256	P26440-2;P26440;J3KR54;H0YLC3	1.0153	J3KS31;O43670-3;O43670-2;O43670;J3QRS9;O43670-4	0.88992	O43592;F8WDU6	0.84422
P27635;F8W7C6;H7C123;H7C2C5;Q96L21;B8A6G2;A6QRI9;H7C2U2	1.1221	O75663;O75663-2	1.0533	O15144;H7C3F9;C9JTV5;G5E9J0	1.1215	J3KRR0;J3QQM5;Q9BT23	1.354	J3QQY2;J3KS45;Q9UM00-2;Q9UM00;J9JIE6	0.73506	O43615;M0QXU7;M0R301;M0QXM9;M0R124	0.78589
P27694;I3L4R8	0.99522	O75821;K7ER90;K7EL20;K7ENA8;K7EP16;K7EL60;K7ENH0	1.1031	O15145;C9JZD1;F8VR50	0.9304	J3KSM3;J3KRR2;J3QKR3;P49720	1.0436	P17844;J3KTA4;B4DLW8;J3QRQ7;J3KRZ1;J3KRX8;J3QSF1;J3QR02;J3QRN5	1.021	O43657	0.98157
P27695;G3V3M6;G3V3C7;G3V5Q1;G3V5D9;G3V5M0;G3V359;G3V574;H7C4A8	0.88116	O75844	0.90183	O15260-2;Q5T8U5;Q5T8U7;O15260;B7Z6A4	0.90794	J3QQT2;J3KRX5;P18621;J3QL51;P18621-2;J3QLC8;J3QS96;J3KRB3;J3KSJ0	0.94407	J3QR09;J3KTE4;P84098;J3QL15	1.1522	O43665-3	0.62349
P27797;K7EJB9	1.0427	O75874;C9J4N6;C9JJE5;C9JLU6	0.99889	O15269	1.4648	J3KS05;P83916;K7ELA4;B5MD17;C9JWS9	1.0541	J3KTF8;P52565;J3QQX2;A8MXW0;J3KRY1;J3KRE2;J3KS60	1.0046	O43678	NaN
P28066;P28066-2	1.0631	O75915;F8WF90;C9JQU6;F8WF33	0.93703	O15294;O15294-3;C9JZL3;O15294-4;O15294-2	0.97435	J3KS15;Q14197	0.87205	Q07955;J3KTL2;Q07955-3;Q07955-2;J3KSR8;J3QQV5;J3KSW7	0.99983	O43681	1.0105
P28070	0.92112	O75934	0.78717	O15355	1.0377	J3KS22;Q7Z4W1;J3QS36;J3QL34;J3QS45;J3KRZ4;J3KSZ5;J3QRQ2	1.0017	Q8IWX8;J3QK89	0.98933	O43707;D6PXK4;F5GXS2;H7C144;K7EJH8;K7EP19	0.94952
P28072;I3L3X7	0.85474	O75937	1.0296	O15397;F5H2I3;F5H244;O15397-2	0.89921	J3QQY2;J3KS45;Q9UM00-2;Q9UM00;J9JIE6	0.80284	Q9UNZ2-4;Q9UNZ2;Q9UNZ2-5;J3QK90;Q9UNZ2-6;F2Z2K0	0.73874	O43719;Q5H919;Q5H918	0.98233
P28074;H0YJM8;P28074-3;P28074-2	1.1104	O75940	1.0884	O15400-2;O15400	1.1125	J3KSI8;J3QQS1;J3QKW2;Q9Y2R9;J3QLS3	1.0728	J3QKR3;P49720;J3KSM3;J3KRR2	1.0044	O43765;K7EMD6;K7ERW5	0.84805
P28838-2;P28838;H0Y9Q1	0.95774	O75947-2;O75947;F5H608	1.145	O15479	0.96416	P17844;J3KTA4;B4DLW8;J3QRQ7;J3KRZ1;J3KRX8;J3QSF1;J3QR02;J3QRN5	1.0281	J3QKS9;J3QLQ6;Q9H8H0	1.0596	O43776;B4DN60;K7EQ35;K7EMQ6;K7EIU7;K7EPK2;B4DG16;K7EJ19	0.89157
P29144;Q5VZU9	1.6547	O76003	0.97072	O15511;O15511-2;B1ALC0	1.0873	J3QR09;J3KTE4;P84098;J3QL15	1.0653	J3QL56;O75880	1.1378	O43809;H3BND3;H3BV41	0.95884
P29401;P29401-2;B4E022;E9PFF2;F8W888;F8WAX4	0.97057	O76094;O76094-2;D6RDY6	1.1266	O43143	1.0624	J3KTF8;P52565;J3QQX2;J3KRE2;A8MXW0;J3KRY1;J3KS60	1.0019	Q13045-2;J3QLG3;Q13045;J3QQU5;J3QLR6;J3QQQ2;J3KS54	0.85212	O43837-2;O43837;O43837-3	1.0684
P29966	0.94824	O94776;Q68DB1	1.0409	O43159;E9PPP6;E9PPY3	1.3129	Q07955;J3KTL2;Q07955-3;Q07955-2;J3KSR8;J3QQV5;J3KSW7	1.0771	J3QLR8;Q9Y3D9	0.85752	O43852;O43852-3;O43852-5;O43852-6;O43852-2;O43852-4;O43852-13;H0Y875;O43852-14;O43852-15;O43852-11;O43852-10;O43852-9;O43852-12;O43852-7;O43852-8	0.92661
P30040;P30040-2;F8VY02	0.84899	O94788-2;O94788;H0YMG7;O94788-3;E9PF31;H0YM00	0.87533	O43172-2;O43172	1.1706	Q8IWX8;J3QK89	1.6295	Q9Y2R9;J3QLS3;J3KSI8;J3QQS1;J3QKW2	0.82166	O60220	1.0133
P30041	0.9574	O94826	1.0236	O43175;Q5SZU1	0.8908	Q9UNZ2;Q9UNZ2-5;J3QK90;Q9UNZ2-6;F2Z2K0;Q9UNZ2-4	1.1508	Q07020;J3QQ67;F8VWC5;G3V203;H0YHA7;F8VYV2;F8VUA6;F8VXR6	1.1122	O60231;B0V0F8;Q5SQH5;Q5JP46;B0V0F7;A2AB15	0.90896
P30046;B7Z522;A6NHG4;B5MC82;J3KQ18;H7C342	0.9924	O94888;F8WB69;H7BYF4	1.079	O43242;B4DT72;H0YGV8	0.94814	Q13045-2;J3QLG3;Q13045;J3QQU5;J3QLR6;J3QQQ2;J3KS54	0.98987	J3QRI7;J3QQQ9;J3QQV1;P61254;J3KTJ8;E5RIT6;J3QRC4;Q9UNX3;J3KSS0;E5RHH1;J3KS10	0.9715	O60264;F6TQG2;P28370-2;P28370	0.99133
P30050;P30050-2	1.101	O94906-2;O94906	3.1607	O43290;E9PQI8	0.84081	J3QLR8;Q9Y3D9	1.0035	J3QQW9;Q15022	NaN	O60271-4;O60271-5;O60271-9;O60271-2;O60271;O60271-3;Q9UPT6-2;E9PFH7;Q9UPT6	1.0526
P30084	0.98848	O94925-3;O94925;H7BZD1	1.2273	O43390;O43390-2;Q2L7G6;E7ETM7	1.0338	Q07020;J3QQ67;F8VYV2;F8VWC5;G3V203;H0YHA7;F8VUA6;F8VXR6	1.1112	Q96MU7-2;Q96MU7;J3QR07	0.62087	O60343-2;O60343-3;O60343	0.68655
P30085;Q5T0D2	1.1632	O94973-3;O94973;O94973-2;O95782-2;O95782;M0R2D9;E9PR62;E9PJJ7	4.0335	O43396;K7ER96;K7EKG2;K7EPB7;K7EML9;G3V1K0	1.2466	J3QRI7;J3QQQ9;J3QQV1;P61254;J3KTJ8;E5RIT6;J3QRC4;J3KSS0;E5RHH1;J3KS10	0.97738	J3QRD1;P51648;P51648-2;J3KTD9;I3L2W1	0.88078	O60506;O60506-2;F6UXX1	1.0278
P30086	0.89525	O94992	1.1038	O43399;O43399-5;Q5JWU6;O43399-2;O43399-4;O43399-3;O43399-6	0.92928	J3QQW9;Q15022	NaN	J3QRG6;P42771;P42771-4;K7ES20;P42771-2;K7ENC6;P42772;P42771-3;G3XAG3	0.8664	O60678-2;O60678	0.83119
Q2YDB7;P30405	NaN	O95202;O95202-2;O95202-3	1.0566	O43583;F8VVL1	1.093	J3QRD1;P51648;P51648-2;J3QS00;I3L1M4	0.78372	K7EIG7;J3QRN6;O94832;J3KRL0	1.2339	O60684;F5H4G7;F5GYL8;O15131;Q5TFJ7;H0Y3K0	0.87709
P30419;K7EN42;B7Z8J4;P30419-2	0.80485	O95292;E5RK64;O95292-2	0.63283	O43592;F8WDU6;F5GYW6	0.95916	J3QRG6;P42771;P42771-4;K7ES20;P42771-2;K7ENC6;P42771-3;G3XAG3;P42772	1.0092	P19105;O14950;J3QRS3;J3KTJ1;P24844;P24844-2	1.0188	O60701-3;O60701-2;O60701	0.96624
P30520	0.88879	O95347-2;O95347;Q5T821	0.92375	O43615;M0QXU7;M0R301;M0R124;M0QXM9	0.9428	K7EIG7;J3QRN6;O94832;J3KRL0	0.88914	Q9Y570;J3QT22;Q9Y570-2;Q9Y570-3	1.028	O60763;O60763-2;F5H4X1;F5GYR8;F5GZ76;H0Y7C0;REV__Q5VZ89-5;REV__Q5VZ89-6;REV__Q5VZ89	1.222
P31150;G5E9U5	1.1625	Q5QPQ3;Q5QPQ2;O95372;Q5QPN5;E7EPS4;Q5QPN9;Q5QPQ1;Q5QPQ0	0.26979	O43657	1.1529	P19105;O14950;J3QRS3;P24844;J3KTJ1;P24844-2	1.0305	J3QT28;O43684-2;O43684;B4DDM6;J3QSX4	0.95969	O60832-2;O60832;H7C0M1;C9IYT0;H7BZF2;H7C2Q9;H7C2Q2	0.91567
P31153;B4DN45;Q00266	1.0976	O95373;E9PLJ0;E9PLB2	1.0192	O43665-3	0.67154	O43670-2;O43670;J3QRS9;O43670-4;J3QS27;J3KTL1;J3KRB6;J3KRW6;H0Y3M2;J3KS31;O43670-3	0.76935	Q8WXC6;J3QT29	NaN	O60841	0.88415
P31689;B7Z5C0	1.0283	O95433;G3V438;B4DUR9;H0YJ63;H0YJG7;H0YJU2;G3V3W9;H0YJG6	1.0703	O43678	1.0403	J3QRZ5;P54578;A6NJA2;B7Z4N8;J3QQT6;J3KS55;H0YA47	1.1	Q03252;J9JID7	1.0003	O60869-2;O60869	0.91174
P31930	1.0881	O95573;H7C260;O60488-2;O60488	0.85272	O43681	0.97336	J3QSV6;O76021;I3L3U9;I3L3C4;B4DJ58;I3L234	1.1764	Q13620-1;K4DI93;Q13620;Q13620-3;A6NE76;Q13619-2;Q13619	1.0464	O60884;H3BMW5	0.99868
P31937	NaN	O95758-1;O95758-6;O95758-2;O95758;O95758-5;O95758-4;O95758-7	0.90724	O43707;D6PXK4;F5GXS2;H7C144;K7EJH8;K7EP19	1.0132	Q9Y570;J3QT22;Q9Y570-2;Q9Y570-3	1.0306	K7EIE8;O95983-2;O95983	1.0106	O75083;D6RD66;O75083-3	0.83322
P31942-3;P31942-2;P31942;P31942-4;B4DHY1;P31942-6;P31942-5	0.88605	O95793-2;O95793;Q5JW30;O95793-3	0.67028	O43719;Q5H919;Q5H918	1.1367	J3QT28;O43684-2;O43684;B4DDM6;J3QSX4	0.93227	K7EIF9;K7EK35;Q1KLZ6;P51692;Q8WWS9;P42229	0.77712	O75131;E5RG68;E5RHZ0;H0YB26;E5RJ85;E5RFT7;E5RG97;Q86VY2;Q7Z6C8;Q719H8;Q96FN4;E7ENV7;Q8IYJ1;Q96A23;O95741;Q9UBL6-2;Q86YQ8;Q96A23-2;Q9HCH3;F5GXN1;Q9UBL6	1.0912
P31946-2;P31946;Q4VY20;Q4VY19	0.96293	O95816;B4DXE2;A2A296	1.0106	O43765;K7EMD6;K7ERW5	0.90798	Q8WXC6;J3QT29	NaN	K7EM02;K7EIJ8;Q8IYT4-2;Q8IYT4	NaN	O75145-2;O75145;F8VWR9;E9PPF6;B4DEU8;E9PJZ7;H0YHK3;E7ETG6;B7Z663;Q13136-2;B1N949;B1APN9;Q13136;G3V200;O75334-2;J3KNM3;O75334-4;O75334-3;O75334	1.042
P31947-2;P31947	1.0778	O95831-3;O95831;O95831-2;E9PMA0;O95831-5;Q1L6K4;O95831-4	0.9928	O43776;B4DN60;K7EQ35;K7EJ19;K7EIU7;K7EPK2;B4DG16;K7EMQ6	1.0048	Q03252;J9JID7	0.98415	K7EIR0;Q9BV38	0.97534	O75223;M0QZK8;B8ZZK2;O75223-3;H7BZK5;O75223-2;O75223-4	1.2596
P31948;G3XAD8;F5H0T1;F5H783;F5GXD8;H0YGI8	0.99284	O95881	0.95678	O43809;H3BND3;H3BV41	0.89254	Q13620-1;K4DI93;Q13620;Q13620-3;A6NE76;Q13619-2;Q13619	0.99544	K7EJE8;K7EKE6;F5GZ27;Q8N8K8;P36776;K7ER27;K7ER56;K7ERR6	1.0214	O75306-2;O75306;B7Z9L2	0.84104
P31949	1.0199	O96008;O96008-2;K7EKG4;K7EJ57	1.0133	O43837-2;O43837;O43837-3	0.962	K4DID9;Q59FY4;Q13085-3;Q13085-2;Q13085;Q13085-4	0.89031	K7EJR3;P48556;K7EJC1;K7ERW6;K7ENY6	0.97401	O75340-2;O75340;H0Y9N1;H0Y9X3	0.91595
P32119;A6NIW5;P32119-2	0.93063	O96019-2;O96019;H7C5S0	0.88692	O43852;O43852-3;O43852-5;O43852-2;O43852-4;H0Y875;O43852-15;O43852-6;O43852-13;O43852-14;O43852-9;O43852-11;O43852-10;O43852-12;O43852-7;O43852-8	1.0002	K7EIE8;O95983-2;O95983	0.77652	K7EM56;P62841;K7ELC2;K7EQJ5;K7EJ78	0.97569	O75348;C9JYK3;O95670-2;F2Z307;O95670;C9JRT2	1.0004
P33176;E9PET8;J3KNA1;O60282;Q12840;O60282-2	1.116	P00338;P00338-3;P00338-4;P00338-5;P00338-2;F5H308;F5GYU2;F5GXY2;F5GXH2;F5H5J4;F5H6W8;F5GZQ4;F5H8H6;F5GXC7;F5GWW2;F5GXU1;F5H5G7;F5H155;G3XAP5;F5H245;Q6ZMR3;P07864	1.0368	O60220	1.0251	K7EIJ8;Q8IYT4-2;Q8IYT4;K7EM02	1.2935	Q3MHD2;Q3MHD2-2;K7ELG9	0.98235	O75367-2;O75367-3;O75367;B4DJC3;D6RCF2	0.8459
P33993;P33993-3;P33993-2;C9J8M6	1.0515	P00367;B4DGN5;B3KV55;P49448	1.0991	O60264;F6TQG2;P28370-2;P28370	0.94697	K7EIN4;K7EQ63;Q13445	1.1476	P14314-2;P14314;K7ELL7;K7EPW7;K7EKX1;K7EJ70	0.96078	O75368	0.84981
P34897-3;P34897;P34897-2;B4DLV4;G3V2Y4;H0YIZ0;G3V5L0;G3V4W5;G3V540;G3V2D2;G3V241;G3V3Y8;G3V4T0;G3V4X0;G3V2W0;G3V2E4;B4DPM9;P34896-3;P34896-2;A8MYA6;P34896	1.1236	P00387-2;P00387;P00387-3;B1AHF3	0.93926	O60271-4;O60271;O60271-5;O60271-3;O60271-9;O60271-2;D6RHI8	0.87922	K7EIR0;Q9BV38;K7EML4	0.97719	K7ELQ0;Q9BYD3-2;K7ES61;Q9BYD3;K7EJ73;K7EKI4;K7ELF1	1.1083	O75369-6;O75369-3;O75369-2;O75369-9;O75369;O75369-8;O75369-5;O75369-4;E7EN95;O75369-7;H7C5L4	1.0171
P34932	0.99703	P00390-5;P00390-4;P00390-2;P00390-3;P00390;E5RI06;H0YBD4;H0YC68	0.78458	O60306;H0YH15	0.97438	K7EIU8;Q13485	NaN	K7EM09;K7EPR0;K7ELQ9;Q6UW68	0.85529	O75396	0.88812
P35232;C9JW96;C9JZ20;E7ESE2;E9PCW0;B4DY47;D6RBK0	0.99661	P00403	0.96802	O60343-2;O60343-3;O60343	1.883	K7EJE8;K7EKE6;Q8N8K8;P36776;F5GZ27;K7ER27;K7ER56;K7ERR6;K7EQF8	0.97811	K7ELV2;Q96EE3;Q96EE3-1;K7EP88;K7EPZ5;K7ENI5	1.0205	O75400-2;O75400-3;O75400;H7C2N3;H0YG38;F5H578	0.96726
P35268;K7ELC4;K7EMH1;K7ERI7;K7EP65;K7EKS7;K7EJT5;C9JYQ9;Q6P5R6;H0Y8C2	1.6419	P00441;H7BYH4	0.94785	O60493-2;O60493-4;O60493;O60493-3	1.06	K7EM56;P62841;K7ELC2;K7EQJ5;K7EJ78	1.0549	K7EM11;O14908-2;O14908	NaN	O75436;G3V1N8;O75436-2;F5H4L7	0.9299
P35573;P35573-2;P35573-3	1.1511	P00491;G3V5M2;G3V308;G3V393;G3V2H3	0.88956	O60506;O60506-3;O60506-2;O60506-4;O60506-5;F6UXX1	0.98414	K7ELG5;Q8IYJ9;P51452	NaN	P41567;K7EM18	0.99996	O75438;O75438-2	1.2637
P35579;P35579-2;Q5BKV1;P35749-4;P35749-3;P35749;P35749-2;B1AH99;Q7Z406-5;Q7Z406-4;Q7Z406;Q7Z406-6;F2Z2U8;Q7Z406-2;G8JLL9	1.0448	P00492;Q9NRG1-2;Q9NRG1	0.97584	O60573;B8ZZL3;C9JEL3;B9A044;B8ZZJ9;B8ZZ50	1.2087	P14314-2;P14314;K7ELL7;K7EPW7;K7EKX1;K7EJ70	1.0048	K7EML9;K7ER96;O43396	0.97396	O75439;E7ERZ4;G3V0E4	0.994
P36543-2;P36543;P36543-3;C9J8H1	1.196	P00505;E7ERW2	0.99964	O60678-2;O60678	0.91714	K7ELQ0;Q9BYD3-2;K7ES61;Q9BYD3;K7EJ73;K7EKI4;K7ELF1	1.1063	Q49A26-5;Q49A26-4;K7EMM8;Q49A26-2;Q49A26-3;Q49A26	1.1661	O75475;O75475-3;O75475-2	0.77085
P36551;H0YA22	1.2255	P00558;B7Z7A9;E7ERH5;P07205	0.94684	O60684;F5H4G7;F5GYL8;O15131;Q5TFJ7;H0Y3K0	0.99816	K7EM09;K7EPR0;K7ELQ9;Q6UW68	0.91416	K7ENI6;K7ERE1;Q8N2U0	0.96073	O75489;B4DFM8;E9PS48;G3V194	0.83661
P36578;H3BM89;H3BU31;H3BTP7	1.0846	P00846	0.9778	O60701-3;O60701-2;O60701	1.0399	K7ELV2;Q96EE3;Q96EE3-1;K7EP88;K7ENI5;K7EPZ5	1.1505	K7ENR6;Q969U7	0.84708	O75494-5;Q5JRI1;O75494-4;O75494-6;O75494-3;O75494-2;O75494;Q8WXF0	1.2287
P36871;P36871-3;P36871-2	1.1171	P00918;E5RID5;E5RK37	1.0707	O60739	0.795	P41567;K7EM18	0.96345	K7ENW5;K7ES52;K7ERJ1;P04183;K7ERV3	0.73372	O75531	1.0024
P36957;Q86SW4;B7Z5W8;H0YJF9;G3V5M3;G3V3F0	0.89898	P02545-2;Q6UYC3;P02545-3;P02545;Q5TCI8;D6RAQ3;P02545-4;H0YAB0	1.0114	O60763;O60763-2;F5H4X1;F5GYR8;F5GZ76;H0Y7C0;REV__Q5VZ89-5;REV__Q5VZ89-6;REV__Q5VZ89	1.1452	Q49A26-5;Q49A26-4;K7EMM8;Q49A26-2;Q49A26-3;Q49A26	NaN	K7EP46;P52888;K7EIK4;K7EMU4;K7EL32;B3KSE2;K7EL02	1.3523	O75533;H7C341	1.0604
P37108;H0YLA2	1.0247	P03886	0.84425	O60832-2;O60832;H7C0M1;C9IYT0;H7C2Q9;H7BZF2;H7C2Q2	0.98176	K7ENG2;P26368-2;P26368	0.94315	K7EQ03;Q9BTD8-4;Q9BTD8-2;Q9BTD8-3;K7EP90;Q9BTD8	NaN	O75607	0.87512
P37198	1.3154	P04035-2;P04035;P04035-3	0.016538	O60841	1.0135	K7ENR6;Q969U7	0.81478	K7EPT6;Q92804-2;Q92804;K7EKB2	1.022	O75629	0.97557
P37802;C9J5W6;Q9UI15	1.0772	P04040	0.78576	O60869-2;O60869	1.024	K7ENW5;K7ES52;K7ERJ1;P04183;K7ERV3	0.86719	K7EQA8;Q86X55-2;Q86X55-1;Q86X55	1.2261	O75643;O75643-2;C9JAQ9;B4E0P5	0.97014
P37837;F2Z393	0.93456	P04075;J3KPS3;H3BQN4;H3BPS8;H3BUH7;H3BR04;H3BMQ8;H3BU78;H3BR68;Q5T7D5;P05062	0.97018	O60884;H3BMW5	0.90165	K7EQ03;Q9BTD8-4;Q9BTD8-2;Q9BTD8-3;K7EP90;Q9BTD8;K7ER08	0.89435	K7EQD9;Q9BRP1	0.99976	O75663-2;O75663	1.0899
P38117;P38117-2;M0QY67	0.97537	P04080	1.1396	O75083;O75083-3;D6RD66	1.0928	K7EPJ1;Q16763	0.6113	K7ERZ3;K7EQF4;O60664-3;O60664;K7EL96;O60664-2	1.0441	O75794	0.81481
P38159;H0Y6E7;H3BT71;P38159-2;Q96E39;H3BR27;P38159-3;B3KRG5;H3BUY5;H3BNC1;O75526;Q8N7X1	0.91525	P04181;P04181-2	0.96923	O75131;E5RG68;H0YB26;E5RHZ0;E5RJ85;E5RG97;E5RFT7;Q86VY2;Q7Z6C8;Q719H8;Q96FN4;E7ENV7;Q8IYJ1;Q96A23;O95741;Q9UBL6-2;Q86YQ8;Q96A23-2;Q9HCH3;F5GXN1;Q9UBL6	1.0026	K7EQA8;Q86X55-2;Q86X55-1;Q86X55	NaN	K7ERN7;Q9NVX2	1.1403	O75821;K7ER90;K7EL20;K7ENA8;K7EL60;K7ENH0;K7EP16	1.0698
P38646;D6RJI2;H0YBG6;D6RA73;H0Y8S0	1.0403	P04350;M0R278;M0R1I1	0.79094	O75306-2;O75306;B7Z9L2	0.85023	K7ERZ3;K7EQF4;O60664-3;O60664;K7EL96;K7ER39;O60664-2	0.9563	P50570-2;K7ESI9;P50570;P50570-3;F5H4R9;E9PEQ4;Q05193-5;Q05193-3;Q05193-4;Q05193-2;Q05193;K7EPK9;E5RIK2;Q6P2G1;E5RHK8;Q9UQ16-2;Q9UQ16-3;Q9UQ16;Q9UQ16-4	0.98132	O75844	0.81806
P38919;I3L3F6;I3L2Z3;I3L3H2;I3L2M0;J3QQP0;E9PBH4;F8WE11	1.2135	P04406;E7EUT4;E7EUT5;O14556	0.98406	O75340-2;O75340;H0Y9X3;H0Y9N1	0.88776	K7EQQ8;Q9NXH9-2;Q9NXH9;K7EQY6;K7ENI9;K7ERR5;K7EQU7	1.0057	O14579-2;O14579;M0QXB4;M0R061;O14579-3	1.0182	O75874;C9J4N6;C9JJE5;C9JLU6	0.88765
P39019;M0R2L9;M0QXK4;M0QYF7;M0R140	0.98158	Q5SRN7;P30455;P30443;P13746;P04439;Q5SRN5;P13746-2;P05534;A2BDY9;Q29960-2;B0S7Z4;P01893;P30459;P10314;P30447;P16188;Q29960;P30508;B0S7Z5;B0S7Z6;B0UXQ1;A9R9N8;A2ARK8;Q29940;P30685;P30498;P30495;P30493;P30492;P30491;P30490;P30484;P30464;P18465;P18464;P10319;Q09160;P30512;P30457;P30456;P30453;P30450;P18462;P16190;P16189;P10316;P01892;P01891;B0UXQ0;Q9TNN7;Q29963;Q07000;P30505;P30501;P30510;P30504;B0U…	1.2455	O75348;C9JYK3;O95670-2;F2Z307;O95670;C9JRT2	0.97688	K7ERT7;Q99536	0.83493	M0R0J2;M0R3A8;M0QYF4;Q9NWS0-3;M0QXD5;M0QYA2;Q9NWS0	NaN	O75915;F8WF90;C9JQU6;F8WF33	0.85768
P39023;H7C422;G5E9G0;H7C3M2;F8WCR1;B5MCW2;Q92901	1.0319	P04843;B7Z4L4;F8WF32	1.0204	O75367-2;O75367-3;O75367;B4DJC3;D6RCF2	0.91939	P50570-2;K7ESI9;P50570;Q05193-5;Q05193-3;Q05193-4;Q05193-2;Q05193;K7EPK9	0.9367	M0QXF7;Q969H8;M0QYN0	1.0047	O75934	1.1468
P39656;E7EWT1	1.0032	P04844-2;P04844;Q5JYR4;Q5JYR7;F2Z3K5;Q5JYR3;H0Y5M1	1.0317	O75368	0.76063	M0QX85;M0R1K2;M0R3B2;Q9Y314;M0R1T7	0.92432	Q96B54;M0QXZ5	NaN	O75937	0.98142
P39687;H0YN26;O43423	1.0965	P05114;F2Z2W6;F2Z2Y5;H7BXJ5;A6NEL0;A6NL93	0.78621	O75369-6;O75369-3;O75369-2;O75369-9;O75369;O75369-8;O75369-5;O75369-4;E7EN95;O75369-7	0.87444	O14579-2;O14579;M0QXB4;M0R061;O14579-3	1.0536	M0QY97;Q9UPT8	0.64808	O75940	0.67211
P39748;I3L3E9;F5H1Y3	0.93519	P05141;Q9H0C2	1.0686	O75376-2;O75376;C9JAP0;E7EVU5;E7EW50;J3KS51	2.3452	M0QXF7;Q969H8;M0QYN0	0.9147	M0QYE0;M0R0I3;M0QZV5;Q99961;M0R2K6;F5H5J3;Q99961-2;Q99962	0.80191	O75947-2;O75947;F5H608	0.96167
P40429;M0QYS1;Q6NVV1;M0QZU1	1.5129	P05198;H0YJS4;G3V4T5	0.89575	O75380;D6RBT3	1.031	M0QY97;Q9UPT8	0.70192	P53680-2;P53680;M0R0N4;M0QYZ2;M0R1S0;M0QZ21	1.5342	O75964;E9PN17	1.0103
P40925-2;P40925;P40925-3;B9A041;B8ZZ51;C9JF79;C9JRL4	0.97681	P05204;Q15651-2;Q15651	0.66884	O75396	1.0395	M0R3C8;M0QYH2;Q96T60	1.0248	M0R050;Q9NQT4	0.77704	O76003	0.93367
P40926;E9PDB2;G3XAL0	0.9634	P05386	0.97027	O75400-2;O75400-3;O75400;H7C2N3;H0YG38;F5H578	0.99871	M0QZQ8;Q8IUR0	1.2897	M0R0F0;P46782;M0R0R2;M0QZN2	1.0413	O76021;J3QSV6;I3L3U9;I3L3C4;B4DJ58;I3L234	0.99925
P40938-2;P40938	1.6579	P05387	1.0047	O75436;G3V1N8;F5H4L7;O75436-2	0.98807	M0QZR8;P28340;M0R2B7	NaN	M0R0Y2;P54920;M0R213;M0R2M1;M0QZM9;M0QZN5;M0R031;Q4G0M0;B4DK44;Q9H115	0.93373	O76031	0.96532
P40939;H0YFD6;B4DYP2	1.0004	P05388;Q3B7A4;F8VWS0;F8VU65;F8VW21;F8VPE8;G3V210;Q8NHW5;F8VQY6;F8VRK7;F8VZS0;F8VWV4;F8VS58;F8W1K8	0.99584	O75438;O75438-2	0.97319	M0QZV5;Q99961;M0QYE0;M0R0I3;F5H5J3;Q99961-2;Q99962	1.1456	M0R192;P30043;M0QZL1	0.77717	O76094;O76094-2;D6RDY6	0.96049
P41091;Q2VIR3;Q2VIR3-2;F8W810;H7BZU1	0.81914	P05976-2;P05976;P08590	1.0638	O75439;G3V0E4;E7ERZ4;F8WAZ6;F8WEA6;F8WBE1	0.90426	M0R0F0;P46782;M0R0R2;M0QZN2	1.0296	M0R1L7;O43633;M0R1T5	0.91329	O94760;O94760-2;B4DYP1;B4DGT0	0.93911
P41227-2;P41227;C9JN83	0.78294	P06132;H0Y5R6	0.83302	O75475;O75475-3;O75475-2	0.94695	M0R0Y2;P54920;M0R2M1;M0R213;M0R0I4;Q4G0M0;B4DK44;Q9H115	0.99289	M0R208;Q16740;M0QYV5	0.76565	O94776;Q68DB1;F8VSM3;H0Y4T7;D6W5A2	0.95438
P41240;H3BUM9;K7ENL8;K7ES68;P42679-3;K7EQY5;P42679;P42679-2	0.87695	P06280	0.94214	O75489;B4DFM8;E9PS48	0.91406	M0R208;Q16740;M0QYV5	0.91161	M0R210;P62249;M0R3H0;M0QX76;M0R1M5;Q6IPX4	1.2977	O94826	1.0429
P41250	0.9675	P06493;P06493-2;E5RIU6;K7ELV5;E7ESI2;P24941-2;P24941;Q00526;G3V5T9;G3V317;K7EJ83;Q00535-2;H0YAZ9;Q00535;Q00534;E7EUK8;Q96Q40-2;Q96Q40-4;E5RGN0;Q96Q40-3;O94921-3;F8W6H8;Q96Q40;O94921-2;O94921;F5H6Z0;Q07002;Q07002-2;Q00536;Q00536-3;Q07002-3;Q00537-2;Q00537;Q00536-2;J3QSD7;Q9NYV4-3;Q14004-2;Q9NYV4-2;Q9NYV4;Q14004	1.0729	O75494-5;Q5JRI1;O75494-4;O75494-6;O75494-3;O75494-2;O75494	1.0746	M0R210;P62249;M0R3H0;M0R1M5;M0QX76;Q6IPX4	1.2789	P28340;M0R2B7;M0R3H8;M0QZR8	1.248	O94888;C9JAT7;F5GYB1;F8WB69;H7BYF4	1.0102
P42677;Q5T4L4;C9J1C5	1.0678	P06576;F8VPV9;H0YH81;F8W079;F8W0P7;H0YI37;F8VQY0	1.0002	O75531	0.93045	M0R389;Q15102;M0QZT2;M0QXS6;M0R323;M0R1K3	0.84	M0R389;Q15102;M0QZT2;M0QXS6;M0R323;M0R1K3	0.93545	O94906-2;O94906	0.87
P42704;B8ZZ38;C9JCA9;H7C3W8	1.0353	P06733;P06733-2;K7EM90;K7EQF3;K7EN23;P13929-3;B7Z2X9;P13929-2;P13929;P09104;E5RI09;E5RG95;K7EPM1;K7EKN2;E5RGZ4;F5H0C8;F5H1C3;F5H5U1;F5GWQ3;F5GZ30	1.0078	O75533;H7C341;O75533-2;B4DGZ4	0.97265	M0R3C3;Q9NZ01;B3KSQ1;Q9NZ01-2;M0QXM3	0.94539	M0R3B2;Q9Y314;M0QX85;M0R1K2;M0R1T7	1.0662	O94925-3;O94925;H7BZD1;C9JIJ6;B8ZZA8	0.683
P42766;H0Y3A0;F2Z388	0.95681	P06737-2;P06737;E9PK47;E9PMM6;P11217-2;P11217;H0Y4Z6	1.0101	O75607	1.0486	Q92797-2;M0R3C7;Q92797;M0R1C2;M0R180;M0QXP5	0.779	M0R3C3;Q9NZ01;Q9NZ01-2;B3KSQ1	0.97699	O94992	0.77877
P43487;C9JXG8;C9JJ34;C9JGV6;C9JDM3;C9JIC6;H7C137;B3KUP2	0.98533	P06744;P06744-2;K7EP41;K7ELR7;K7ERC6;K7ENR8;K7EIL4;K7ERK8;K7ESF4	0.99577	O75629	1.0813	O00116	0.94828	Q92797-2;M0R3C7;Q92797;M0R1C2;M0R180;M0QXP5	0.78919	O95197-3;B7Z4M1;O95197-6;O95197-5;O95197-4;F5H774;O95197-2;O95197	1.0116
Q5SYT8;P43490	0.85445	P06748;P06748-3;P06748-2;E5RI98;E5RGW4	1.0201	O75643;O75643-2;C9JAQ9;B4E0P5	1.0337	O00148;Q8N5M0;B1Q2N1;K7EQN7;K7EPJ3	1.0726	O00116	1.0221	O95202;O95202-2;O95202-3	0.98079
P43686;P43686-2	0.9607	P06753-2;P06753-3;Q5VU58;Q5VU59;Q5VU66;Q5VU61;Q5VU72;J3KN67;D6R904;P06753;K7EP68;Q5VU63;D6RFM2;A6NL28-2;A6NL28	1.0141	O75663;O75663-2	1.0387	O00151	1.1025	O00148;Q8N5M0;B1Q2N1;K7EQN7;K7EPJ3;K7EN69;K7ENP6;K7EL56;K7EIL8;F6SXL5;K7EN25	1.114	O95292;E5RK64;O95292-2	0.98407
P45880-2;P45880;P45880-1;B4DKM5;Q5JSD2;Q5JSD1;A2A3S1	1.0807	Q16778;P33778;P23527;P06899;Q6DRA6;Q6DN03	0.94312	O75688-3;O75688	0.7907	O00154-6;O00154-4;O00154;O00154-5;K7EKP8;O00154-2;B4DUX0;O00154-3;F5GWE2;Q6ZUV0	1.0563	O00151	1.0098	O95336;M0R261;M0R1L2;M0R0U3	0.85808
P45974-2;P45974	0.88732	P07108;P07108-3;P07108-2;P07108-4;P07108-5	0.97532	O75691	NaN	O00161;H3BNE1;H3BR18;H3BM38;H3BPJ0;O00161-2;H3BNG6;H3BU94;H3BR99;H3BV99;H3BP15;H3BQY9	1.0354	O00154-6;O00154-4;O00154;O00154-2;O00154-3;O00154-5;B4DUX0;K7EKP8;F5GWE2	1.0286	O95347-2;O95347;Q5T821	0.81998
P46013-2;P46013	1.2341	P07195;A8MW50;C9J7H8;F5H793	0.99939	O75821;K7ENA8;K7ER90;K7EL20;K7EP16;K7EL60;K7ENH0	1.0665	O00170;E9PPD7;E9PMH2	0.9339	O00161;H3BNE1;H3BR18;H3BM38;H3BPJ0;O00161-2;H3BR99;H3BV99;H3BP15;H3BQY9	0.85232	O95373;E9PLB2;E9PLJ0	1.0172
P46087-2;P46087;P46087-4;P46087-3;F5GYR3	1.4159	P07237;I3L2P8;F5H8J2;H7BZ94;I3L398;H0Y3Z3;I3L312;I3L4M2;I3NI03;I3L0S0;I3L3U6;I3L3P5;I3L1Y5;I3L514	0.93555	O75844	0.94406	O00178;B0QY59	0.81185	O00170;E9PMH2;E9PPD7	0.92046	O95400	0.85077
P46777;Q5T7N0	1.1275	P07305;P07305-2	0.52772	O75874;C9J4N6;C9JJE5;C9JLU6	0.9308	O00186	0.80119	O00178;B0QY59	0.91777	O95433;B4DUR9;G3V438;H0YJ63;H0YJG7;G3V3W9;H0YJU2;H0YJG6	1.032
P46778;G3V1B3;M0R181	0.96102	P07339;H7C469;F8WD96;C9JH19;H7C1V0;F8W787	1.0357	O75915;F8WF90;C9JQU6;F8WF33	0.91585	O00231;O00231-2;J3QRY4;J3QS13	0.96591	O00186	0.91524	O95573;O60488-2;O60488	0.74913
P46781;B5MCT8;C9JM19;F2Z3C0;A8MXK4	1.4504	P07355;H0YN42;P07355-2;H0YMD0;H0YMU9;A6NMY6;H0YKS4;H0YM50;H0YMM1;H0YNP5;H0YKZ7;H0YLV6;H0YMT9;H0YKX9;H0YN28;H0YL33;H0YKL9;H0YMW4;H0YNA0;H0YKV8;H0YMD9;H0YNB8;H0YN52;H0YKN4;H0YLE2	1.0457	O75934	1.0912	O00232;O00232-2	0.97614	O00231;O00231-2;J3QRY4;J3QS13	0.97656	O95758-1;O95758-6;O95758-2;O95758;O95758-5;O95758-4;O95758-7	0.83042
P46783;F6U211;Q9NQ39	1.0094	Q5JP53;P07437;Q5ST81;E9PBJ4;G3V2A3;G3V5W4;G3V2R8;G3V3R4;G3V2N6	0.96494	O75937	1.0446	O00264;B7Z1L3	0.90354	O00232;O00232-2	0.95407	O95782-2;O95782;E9PJJ7;M0R2D9;E9PR62	0.87357
P46940;H0YLE8;E9PDT6;Q13576-2;J3KR91;F5H7S7;E7EWC2;Q13576;F2Z2E2;Q86VI3	1.1807	P07737;K7EJ44;CON__P02584;I3L3D5	1.0641	O75940	0.96765	O00267-2;O00267;M0QYL9	0.9444	O00264;B7Z1L3;O15173	0.9714	Q5JW30;O95793-2;O95793-3;O95793;Q5JW28	0.90498
P47813;O14602;A6NJH9	1.1158	P07814	0.91601	O75947-2;O75947;F5H608	1.0696	O00273-2;O00273	1.0017	O00267-2;O00267	0.83424	O95816;B4DXE2;A2A296	0.8081
P47914	0.81468	P07858	1.0378	O76003	1.0606	O00299	0.87658	O00273-2;O00273	0.95364	O95831-3;O95831;Q1L6K4;O95831-4;O95831-2;E9PMA0;O95831-5	0.9294
P47985;P0C7P4	1.0895	P07900;P07900-2;Q86U12;G3V2J8;Q58FG0;Q14568	0.96318	O76031	0.95327	O00410;O00410-3;H0Y8C6;O00410-2;B4E0R6;E7ETV3;E7EWK4;E7EX05;E7EQT5;E7EV12;C9JZD8;C9J875;C9JQT6;E7ESA1;E7ESZ1;E7ETV8;C9JMV5;H0Y3V4;C9JXE0;C9J5I6;C9JZ53	1.0554	O00291-3;O00291	0.94497	O95881	0.92342
P48047;H7C0C1;H7C068;H7C086	0.99941	P07910;G3V4W0;B4DY08;P07910-2;G3V576;P07910-4;P07910-3;G3V555;G3V575;G3V5V7;G3V2D6;G3V5X6;G3V3K6;G3V251;B4DSU6;O60812;G3V4M8;G3V2H6;E5RG71;B3KT61;Q86SE5;G3V129	0.99113	O76071	0.88487	O00422;H7BZW6	1.0116	O00299	0.94728	O96008;O96008-2;K7EKG4;K7EJ57	0.9818
P48507	NaN	P07919	1.8187	O76094;O76094-2;D6RDY6	1.4024	O00425;O00425-2;F8WD15	0.99264	O00410;O00410-3;H0Y8C6;O00410-2;B4E0R6;E7ETV3;E7EWK4;E7EX05;E7EQT5;E7EV12;C9JMV5;H0Y3V4;C9JZD8;C9J875;C9JQT6;E7ESA1;E7ESZ1;E7ETV8;C9JXE0;C9J5I6;C9JZ53;O60518	1.0485	O96019-2;O96019;H7C5S0	0.83941
P48637;B7Z514;B6F210	0.73125	P07954-2;P07954	0.79701	O94760;O94760-2;B4DYP1;B4DGT0	1.0508	O00429-3;O00429;O00429-6;O00429-4;O00429-5;G8JLD5;O00429-2;J3KPI2;B4DGC9;B4DPZ9;F8W1W3;F8VUJ9;F8VZ52;H0YI79;F8VR28;F8VYL3;B4DDQ3	0.97619	O00422;H7BZW6	0.9564	P00338;P00338-3;P00338-4;F5H308;P00338-5;P00338-2;F5GYU2;F5GXY2;F5GXH2;F5H5J4;F5H6W8;F5GZQ4;F5H8H6;F5GXC7;F5GWW2;F5GXU1;F5H5G7;F5H155;G3XAP5;F5H245;Q6ZMR3;P07864	1.0749
P48643;E7ENZ3;B7ZAR1;E9PCA1;B4DYD8;D6RIZ7;H0Y914	1.0154	P08107;P08107-2;E7EP94;Q5SP16	0.95535	O94776;Q68DB1	0.97509	O00442;O00442-2;A6NIC1	1.0289	O00425;O00425-2;F8WD15	1.0145	P00367;B4DGN5;P49448;B3KV55	1.0075
P48729;P48729-2;E5RG27;D6RGE5;H0Y9X2;Q71TU5	1.0616	P08237;P08237-3;P08237-2	2.8729	O94826	1.1071	O00487;C9JW37	0.79283	O00429-3;O00429;O00429-6;O00429-4;O00429-5;G8JLD5;O00429-2;J3KPI2;B4DGC9;B4DPZ9;F8W1W3;F8VUJ9;F8VZ52;H0YI79;F8VR28;F8VYL3;B4DDQ3	0.9314	P00387-2;P00387;P00387-3;B1AHF3	0.96908
P49006	0.9877	P08238;Q58FF7;Q5T9W8;H0Y6E4;H0Y5S7;H0Y598	0.97792	O94874;O94874-3;O94874-2	2.064	O00560;O00560-3;O00560-2;G5EA09;B4DHN5;E9PBU7	0.8422	O00442;O00442-2;A6NIC1	1.0848	P00390-5;P00390-4;P00390-2;P00390-3;P00390;H0YBD4;H0YC68;E5RI06	0.95179
P49189;B4DXY7	1.0015	P08240-2;P08240	0.084095	O94888;C9JAT7;F5GYB1;F8WB69;H7BYF4	1.0867	O00567;H0Y653;H0YDU4;Q5JXT2	0.90211	O00479	NaN	P00403	0.87976
P49207	0.95836	P08243-2;P08243;P08243-3;F8WEJ5;C9J057;C9JLN6;C9JM09;C9JT45	0.90113	O94906;O94906-2	1.1917	O00571;O00571-2;B4DXX7;O15523;B4E132;B4E3C4;B4DLA0;C9J081;C9J8G5;H0Y960;D6RCM4;Q9NQI0-3;Q9NQI0-2;D6RDK4;Q9NQI0	1.0156	O00487;C9JW37	0.89683	P00441;H7BYH4	0.91276
P49257	NaN	P08559-3;P08559;P08559-2;P08559-4;Q5JPU3;Q5JPU0;Q5JPT9;Q5JPU1;P29803	1.4656	O94925-3;O94925;B8ZZC5;H7BZD1;B8ZZA8;O94925-2	1.106	O00629;H7C4F6	1.0227	O00560;O00560-3;O00560-2;G5EA09;B4DHN5;E9PBU7	1.0348	P00491;G3V5M2;G3V2H3;G3V308;G3V393	0.96457
P49321;P49321-3;P49321-2;Q5T624;F5H3J2;H0YDS9;E9PRH9;H0YF33;E9PI86;E9PPQ8;E9PPR5	1.0694	P08574	5.6833	O94973;O94973-2;E9PJJ7	1.3791	O00743;O00743-3;O00743-2;Q5T1S7;B7Z3E2	0.96815	O00567;H0Y653;H0YDU4;Q5JXT2	0.95706	P00492;Q9NRG1-2;Q9NRG1	1.0378
P49327	1.0192	P08621-2;P08621;P08621-3;M0QYR1;M0QX04;P08621-4	0.9253	O95163;F5H2T0	0.92001	O00762-2;O00762;O00762-3	NaN	O00571;O00571-2;B4DXX7;O15523;B4E3C4;B4E132;B4DLA0;C9J081;C9J8G5;D6RCM4;Q9NQI0-3;Q9NQI0-2;D6RDK4;Q9NQI0;H0Y960	0.99552	P00505;E7ERW2	1.0192
P49368;P49368-2;B4DUR8;E9PRC8;Q5SZX6;Q5SZX9;E9PM09;Q5SZW8;E9PQ35	1.024	P08670;B0YJC4;B0YJC5;Q5JVS8;P17661;H7C5W5;P41219;P41219-2;Q16352;P07197-2;E7EMV2;E7ESP9;P07197;P12036-2;P12036	0.97459	O95197-3;B7Z4M1;O95197-6;O95197-5;O95197-4;F5H774;O95197-2;O95197	0.87223	O00764-2;O00764;F2Z2Y4;A8MV33;O00764-3	1.03	O00629;H7C4F6	0.96424	P00558;B7Z7A9;E7ERH5;P07205	0.94852
P49411;H3BNU3	1.0566	P0CW22;P08708;H0YN88;H0YK46;H0YN73;H3BNC9	1.0002	O95202;O95202-2;O95202-3	0.93949	Q8TB70;O14530;F8WBV5;G3XAJ4;F8WCJ3;B8ZZX4	1.0389	O00743-2;O00743;O00743-3;B7Z3E2;Q5T1S7	1.0806	P00846	1.0358
P49419-2;P49419;H0YHM6;F8VS02;P49419-4;P49419-3	0.74255	P08754;F5GZL8;P63096-2;B4E2X5;P04899-3;P04899-2;B3KTZ0;P63096;P04899;P04899-4	1.7804	O95239-2;O95239;Q2VIQ3	0.85169	O14545	0.97611	O00762-2;O00762;O00762-3	0.96138	P00918;E5RID5;E5RK37	1.043
P49458;E9PE20;P49458-2	1.0174	P08758;D6RBL5;E7ENQ5;E9PHT9;D6RBE9;D6RCN3	1.0023	O95292;E5RK64;O95292-2	0.80599	O14561;I3L505;H3BNK3	1.0299	O00764-2;O00764;F2Z2Y4;A8MV33;O00764-3	0.91403	P02545-2;Q6UYC3;P02545;P02545-3;Q5TCI8;D6RAQ3;P02545-4;H0YAB0	0.85631
P49588;H3BPK7	0.91339	P09012;M0R0G9;M0QXK2;M0R221;M0R2B8;M0QZG7;M0R268;P08579	0.98574	O95336;M0R261;M0R1L2;M0R0U3	0.98325	O14654	0.9572	O14525-2;O14525	0.90512	P02786;F8WBE5;F5H6B1;G3V0E5	1.0593
P49591;Q5T5C7	0.82133	P09132	0.9198	O95347-2;O95347;Q5T821	1.0718	O14737;B4DE64;K7EQA1;K7EL31;K7ESJ4;Q3HM38;K7EPG2	1.0382	Q8TB70;O14530	0.90376	P04040	1.0982
P49721	0.8539	P09211;A8MX94	0.95478	O95372;Q5QPQ0;Q5QPQ3;Q5QPQ2;E7EPS4;Q5QPN9;Q5QPQ1;Q5QPN5	0.847	O14744;G3V5W5;O14744-2;B4DX49;G3V580;B4DV00;H0YJX6;A8MTP3;G3V2L6;C9JSX3;G3V5L5;G3V2X6;G3V507;G3V2F5;H0YJ77;H0YJD3;H7BZ44	0.96417	O14545	NaN	P04075;J3KPS3;H3BQN4;H3BPS8;H3BUH7;H3BR04;H3BMQ8;H3BU78;H3BR68;Q5T7D5;P05062	0.98716
P49755;G3V2K7	0.75171	P09234	1.0013	O95373;E9PLB2;E9PLJ0	1.0172	O14773-2;O14773	NaN	O14561;I3L505;H3BNK3	1.0387	P04080	1.0131
P49756;H0YE46;P49756-2;P49756-3	0.79083	P09429;Q5T7C4;Q5T7C6;B2RPK0;Q5T7C0;P23497;P0C6E5	0.97721	O95376	1.486	O14776-2;O14776;G3V220	1.5637	O14654	0.95762	P04181;P04181-2	0.95488
P49773;D6REP8;D6RE99;D6RD60;D6RC06	1.0413	P09496-2;P09496-4;P09496-3;P09496;F8WF69;F5H6N3;C9J8P9	0.83431	O95400	0.82187	O14802	0.92404	O14737;B4DE64;K7EQA1;K7EL31;K7ESJ4;Q3HM38;K7EPG2	1.006	P04350;M0R278;M0QY85;M0R0X0;M0QY37;M0QX14;M0QZL7;M0R1I1	0.80225
P49792;H7BZ48;J3KQ37;Q7Z3J3;A6NKT7;Q99666;O14715;J3KNY6;J3KNE0;E9PGT0	1.0024	P09543-2;P09543;K7ERC4;B4DFN6	1.4518	O95433;G3V438;B4DUR9;H0YJ63;H0YJG7;H0YJU2;G3V3W9;H0YJG6	1.1101	O14818;O14818-2;H0Y586;Q5JXJ2;Q8TAA3-2;Q8TAA3-5;Q8TAA3;F5GY34	0.96994	O14744;G3V5W5;O14744-2;B4DX49;G3V580;A8MTP3;B4DV00;G3V2L6;H0YJX6;G3V5L5;G3V2X6;C9JSX3;G3V507;G3V2F5;H0YJ77;G3V5T6;H0YJD3;H7BZ44	0.92458	P04406;E7EUT4;E7EUT5;O14556	0.9951
P50213-2;P50213;B7Z9J8;H0YL72;H0YMU3;H0YNF5;H0YKD0;H0YLI6;H0YM46	1.0052	P09622;B4DT69;E9PEX6;B4DHG0;F8WDM5;F2Z2E3	1.0741	O95456-2;O95456;F8WBH7	1.046	O14828-2;O14828	0.90927	O14776-2;O14776;G3V220	1.0946	Q5SRN7;P30455;P30443;P13746;P04439;Q5SRN5;P13746-2;P30447;P16188;P05534;A2BDY9;Q29960-2;B0S7Z4;P30459;P10314;Q29960;P30508;B0S7Z5;B0S7Z6;B0UXQ1;A9R9N8;A2ARK8;Q29940;P30685;P30498;P30495;P30493;P30492;P30491;P30490;P30484;P30464;P18465;P18464;P10319;P01893;Q09160;P30512;P30457;P30456;P30453;P30450;P18462;P16190;P16189;P10316;P01892;P01891;B0UXQ0;P30510;P30504;Q9TNN7;Q29963;Q07000;P30505;P30501;B0U…	0.89067
Q5HY57;P50402	NaN	P09661;H0YKK0;H0YMA0;H0YLR3	0.86223	O95573;H7BYZ7;H7C260;O60488-2;O60488	1.0114	Q5VV87;O14880;Q5VV89	NaN	O14818;O14818-2;H0Y586;Q8TAA3-2;Q8TAA3-5;Q8TAA3;Q5JXJ2;F5GY34	0.98319	P04818	0.40927
P50454;E9PKH2;E9PR70;E9PPV6;H0YEP8;E9PLA6;E9PJH8;E9PIG2;E9PRS3;E9PNX1;E9PK86;E9PMI5	1.0776	P09669	1.2681	O95758-1;O95758-6;O95758-2;O95758;O95758-5;O95758-4;O95758-7	1.0074	O14925;Q5SRD1;C9JSY4;E7EP42;E9PB91;B1APJ0	1.8825	O14828-2;O14828	0.87731	P04843;B7Z4L4;F8WF32	1.0689
P50502;H7C3I1;Q8IZP2;Q8NFI4;F6VDH7;F8WAQ7	0.9645	P09874;Q5VX84;Q5VX85	0.98871	O95782-2;O95782;O94973-3;M0R2D9;E9PR62	0.86662	O14929;O14929-2;F8WEW1;F8W9G7	1.0871	O14925;Q5SRD1;C9JSY4;E7EP42;E9PB91;B1APJ0	1.9376	P04844-2;P04844;F2Z3K5;Q5JYR4;Q5JYR7;Q5JYR3	1.0771
P50897;E9PSE5;E9PP28;E9PK48;P50897-2;E9PMG2	1.1031	P09936;D6RE83;D6R956;D6R974;D6RF53	0.88687	O95793-2;O95793-3;O95793;Q5JW30;Q5JW28	0.78131	O14949	1.0974	O14929;O14929-2;F8WEW1;F8W9G7	1.1099	P05114;F2Z2W6;F2Z2Y5;H7BXJ5;A6NEL0;A6NL93	0.66186
P50990;B4DEM7;B4DQH4;H7C4C8;H7C2U0	0.97659	P09960;P09960-4;P09960-2;P09960-3;B4DEH5	0.91776	O95816;B4DXE2;A2A296	0.8677	O14966;P57729;Q13637	0.74119	O14949	1.1561	P05141;Q9H0C2	1.1522
P50991;P50991-2;B7Z9L0;B7Z2F4	1.0339	P09972;K7EKH5;C9J8F3;J3KSV6;J3QKP5;A8MVZ9	0.92561	O95831-3;O95831;O95831-2;E9PMA0;Q1L6K4;O95831-5;O95831-4	0.95791	O14979-3;O14979-2;O14979	1.1153	O14979-3;O14979-2;O14979	1.1278	P05198;H0YJS4;G3V4T5	0.96067
P51116	1.2027	Q71UI9;P0C0S5;Q71UI9-3;Q71UI9-4;Q71UI9-2;C9J0D1;C9J386	0.81967	O95881	0.99505	O14980;C9JKM9;C9J673;C9IZS4;C9JQ02;C9JV99;F8WF71;C9IYM2;H7BZC5;C9JF49	1.0239	O14980;C9JKM9;C9J673;C9IZS4;C9JQ02;C9JV99;F8WF71;C9IYM2;H7BZC5;C9JF49	1.0038	P05204;Q15651-2;Q15651	0.70664
P51148;P51148-2;F8VVK3;K7ENY4;K7ERI8;K7ERQ8;F8VWU4;F8VVZ0;F8VUA5;P61020-2;B4DJA5;P61020;P20339	1.3062	Q99878;Q96KK5;Q9BTM1;Q16777;Q6FI13;P0C0S8;P20671;Q9BTM1-2;H0YFX9	0.85149	Q96II6;O96000;H3BV16;H3BPJ9	0.95671	O15042-2;O15042;E7ET15;O15042-3;C9JDJ7;C9J5L1;E7EW00;H0Y8D9;C9JB80;H7C4V2	0.89345	O15042-2;O15042;E7ET15;O15042-3;C9JB80;C9JDJ7;C9J5L1;E7EW00;H0Y8D9;H7C4V2	0.90113	P05386	1.0086
P51149;C9J592;C9J8S3;C9IZZ0;C9J4V0;C9J4S4;C9J7D1	0.99821	P10155-3;Q5LJA0;P10155-4;P10155;P10155-2;D6RDN1;D6RE09;H0Y9N5	1.0621	O96005;K7EQQ1;B4DDS3;F5H8J3	1.2697	O15067;F5GWT9;H0YGH1;J3QSG0;J3QSH6;J3KTQ5;J3KTL4;J3KT98	1.1661	O15067;F5GWT9;H0YGH1;J3QSG0;J3QSH6;J3KTQ5;J3KTL4;J3KT98	1.0627	P05387;H0YDD8	1.0599
P51571;H7C1C6;A6NLM8	0.9524	P10412;P22492;P16401	0.44933	O96008;O96008-2;K7EKG4;K7EJ57	1.0148	O15127;H3BV04;H3BN93;H3BUB6;H3BPL9	0.52551	O15116;E5RJ47;E5RH18	1.1784	P05388;Q3B7A4;F8VWS0;F8VU65;F8VW21;F8VPE8;G3V210;F8VQY6;F8VRK7;Q8NHW5;F8VZS0;F8VWV4;F8VS58;F8W1K8	1.0091
P51572;P51572-2;C9JSP1;C9JQ75;C9J0M4;C9JMD7;C9JM14	1.0644	P10599;P10599-2	1.0239	O96019-2;O96019;H7C5S0;C9JQT2	0.91921	O15143;F8WCG3;F8VXW2;C9JM51;F8WEB3;C9JTT6;C9JBJ7;C9K057;C9J4Z7;C9JEY1;C9JQM8;C9JFG9;C9J6C8	1.3268	O15121	0.87546	P05783;F8VZY9;CON__P05784;C9JM50;CON__H-INV:HIT000015463;P08727;CON__P08727;CON__P19001	0.88075
P51665;H3BNT7;H3BTM8;B4DXI8;H3BQV2	0.92594	P10606	0.88605	P00338;P00338-3;P00338-4;P00338-5;P00338-2;F5H308;F5GXY2;F5GXH2;F5GYU2;F5H5J4;F5H6W8;F5GZQ4;F5H8H6;F5GXC7;F5GWW2;F5GXU1;F5H5G7;F5H155;G3XAP5;F5H245;Q6ZMR3;P07864	1.0304	O15144;C9JTV5;G5E9J0;G5E9S7;H7C3F9	1.0865	O15127;H3BV04;H3BN93;H3BUB6;H3BPL9	0.8123	P05976-2;P05976;P08590	NaN
P51858;A8K8G0;P51858-2;Q5SZ07	1.0818	P10644;K7EM13;K7EPB2;K7ER48	1.3708	P00367;B4DGN5;B3KV55;P49448	1.1236	O15145;C9JZD1;F8VR50	0.94739	O15143;F8WCG3;F8VXW2;C9JM51;F8WEB3;C9JTT6;C9JBJ7;C9K057;C9J4Z7;C9JEY1;C9JQM8;C9JFG9;C9J6C8	1.3482	P06132;H0Y5R6;Q5T446	0.7764
P51991;E7EWI9;P51991-2;H7C1J8	0.95016	P10768;H7BZT7	0.97146	P00374;B4DDD2;B4DM58	0.66946	O15260-2;Q5T8U5;Q5T8U7;O15260;B7Z6A4	1.0292	O15144;H7C3F9;C9JTV5;G5E9J0	1.0397	P06280	0.61871
P52272-2;P52272;M0QZM1;M0R2T0;M0R019;M0R2I7;M0QYQ7;M0R0N3;M0QY96;M0R0Y6;M0QYL3	1.034	P10809;E7ESH4;E7EXB4;B7Z712;C9JL25;C9JCQ4;C9JL19;C9J0S9	1.0564	P00387-2;P00387;P00387-3;B1AHF3	0.81631	O15269	1.3154	O15145;C9JZD1;F8VR50	0.97634	P06493;P06493-2;E5RIU6;K7ELV5;Q00526;G3V317;K7EJ83;H0YAZ9;Q00534;E7EUK8;Q96Q40-2;Q96Q40-4;E5RGN0;Q96Q40-3;O94921-3;F8W6H8;Q96Q40;O94921-2;O94921;F5H6Z0;Q07002;Q07002-2;Q00536;Q00536-3;Q07002-3;Q00537-2;Q00537;Q00536-2;J3QSD7;Q9NYV4-3;Q14004-2;Q9NYV4-2;Q9NYV4;Q14004	0.95286
P52292;J3QLL0;J3KS65;J3QL07	1.0215	P11021	0.95404	P00390-4;P00390-2;P00390;P00390-5;P00390-3;H0YBD4;E5RI06;H0YC68	0.93703	O15294;O15294-4;O15294-2;O15294-3	0.85793	O15212;A2AB88	0.90986	P06576;F8VPV9;H0YH81;F8W079;F8W0P7;H0YI37;F8VQY0	1.0083
P52597	0.98581	P11142;E9PKE3;P11142-2;E9PNE6;A8K7Q2;E9PN89;E9PLF4;E9PQQ4;E9PQK7;E9PK54;E9PS65;E9PPY6;P54652;E9PN25;E9PM13;E9PI65;E9PSH5	1.0534	P00403	1.1188	O15355	0.98948	O15260-2;Q5T8U5;Q5T8U7;O15260;B7Z6A4	1.0409	P06733;P06733-2;K7EM90;K7EQF3;K7EN23;P13929-3;B7Z2X9;P13929-2;P13929;P09104;E5RI09;E5RG95;K7EPM1;K7EKN2;E5RGZ4;F5H0C8;F5H1C3;F5H5U1;F5GWQ3;F5GZ30	1.0209
P52907;C9JUG7;B4DG50;F8W9N7;P47755	0.90448	P11177-2;P11177;P11177-3;C9J634;F8WF02	0.92066	P00441;H7BYH4	0.90727	O15397;O15397-2;F5H2I3;H0YH64;F5H244	0.91678	O15269;O15269-2	1.4399	P06737-2;P06737;E9PK47;E9PMM6;P11217-2;P11217;H0Y4Z6	0.97506
P53007;B4DP62	1.0863	P11216	0.8609	P00491;G3V5M2;G3V308;G3V2H3;G3V393	0.90924	O15400-2;O15400	1.1396	O15294;O15294-4;O15294-2;O15294-3	0.93843	P06744;P06744-2;K7EP41;K7ELR7;K7ERC6;K7ENR8;K7ERK8;K7ESF4;K7EIL4;Q8N196	0.97529
P53396-2;P53396;B4E3P0;K7ESG8;K7EIE7	0.993	P11387;E5RIC7;Q969P6-2;Q969P6;E5RJ33;H0YBR3;H0YC03;E5RGE7;E5RGR4;E5RFE3;E5RGR2;E5RJ95;E5RFS0	0.74763	P00492;Q9NRG1-2;Q9NRG1	0.953	O15479	1.0229	O15355	1.0079	P06748;P06748-3;P06748-2;E5RI98;E5RGW4	1.0594
P53597	1.711	P11388;P11388-2;P11388-3;P11388-4;J3KTB7	0.89572	P00505;E7ERW2	1.0103	O15511;O15511-2;B1ALC0	0.96573	O15397;F5H2I3;F5H244;O15397-2	0.95103	P06753-2;P06753-3;Q5VU58;Q5VU59;Q5VU66;Q5VU61;Q5VU72;J3KN67;D6R904;P06753;Q5VU63;K7EP68;K7ERG3;K7ENT6;D6RFM2;A6NL28-2;A6NL28;K7EPV9	0.93425
P53621;P53621-2	1.3459	P11413;P11413-3;P11413-2;E9PD92;E7EM57;E7EUI8	0.87971	P00558;B7Z7A9;E7ERH5;P07205	0.97044	O43143;F5H658;Q14562	1.0186	O15400-2;O15400	1.0313	Q16778;P33778;P23527;P06899;Q6DRA6;Q6DN03	0.99879
Q5T8R3;Q49A45;Q5T8R5;P53985	1.302	P11766;H0YAG8	1.1258	P00568;Q5T9B7;H0Y4J6;H0YID2	0.9359	O43156	1.4907	O15479;O15481;Q96LZ2;P43366;Q9UBF1	1.0607	P07099;B1AQP8;B1AQP9	1.0209
P53999;D6RC37;D6R970	0.99964	P11940;P11940-2;E7EQV3;E7ERJ7;H0YBQ4;H0YAR2;Q9H361;H0YBN4;H3BNY3;H0YAP2;H3BPI5;E5RGH3;E5RH24;E5RJB9;H0YB86;H0YAS6;H0YB75;Q4VXU2;E5RHG7;H0YAS7;Q4VY17;H0YC10;E5RGC4;E5RFD8;Q5JQF8;Q96DU9	1.0503	P00846	1.0466	O43172-2;O43172	1.0016	O15511;O15511-2;B1ALC0	0.95462	P07108;P07108-3;P07108-2;P07108-4;P07108-5	1.0281
P54136-2;P54136;F5H3T8;E5RH09;E5RJM9	1.1066	P12004	0.91341	P00918;E5RID5;E5RK37	1.0643	O43175;Q5SZU1	0.9034	O43143	1.0607	P07195;A8MW50;C9J7H8;F5H793	1.0414
P54577	0.83747	P12235	2.0548	P02545-2;Q6UYC3;P02545;P02545-3;Q5TCI8;D6RAQ3;P02545-4;H0YAB0	0.92982	O43237;J3KRZ2;J3KRI4;B4DZP4	NaN	O43156	NaN	P07196	0.91779
P54727;P54727-2;Q5W0S5;Q5W0S4;H0Y579;K7ENJ0;K7ELW1;K7ESE3;P54725	1.2566	P12236;I7HJJ0	1.0389	P02786;G3V0E5;F5H6B1;F8WBE5	1.1366	O43242;B4DT72;H0YGV8	0.88085	O43172-2;O43172	0.92892	P07203	0.46529
P54886-2;P54886	0.99396	P12268;H0Y4R1;E7ETK5	0.95743	P04040	1.1422	O43290;E9PQI8	0.98585	O43175;Q5SZU1	0.89998	P07237;H7BZ94;I3L2P8;F5H8J2;I3L398;H0Y3Z3;I3L312;I3L4M2;I3NI03;I3L0S0;I3L3U6;I3L3P5;I3L1Y5;I3L514	0.91834
P55010;H0YLZ1;H0YN40	0.96532	P12270	1.089	P04075;J3KPS3;H3BQN4;H3BPS8;H3BUH7;H3BR04;H3BMQ8;H3BU78;H3BR68;Q5T7D5;P05062	0.95456	O43390;O43390-2;Q2L7G6;E7ETM7	1.009	O43242;B4DT72;H0YGV8	0.92751	P07305;P07305-2	0.39457
P55036;Q5VWC4;H0Y3Y9;A6PVX3;P55036-2;H0Y561	0.88859	P12277;G3V4N7;H0YJG0;G3V461;H0YJK0;G3V2I1	0.96212	P04080	1.0362	O43396;K7ER96;K7EML9;G3V1K0;K7EKG2;K7EPB7	1.0377	O43290	0.96293	P07339;H7C469;F8WD96;C9JH19;F8W787;H7C1V0	0.94335
P55060-3;P55060;F8W904;B4DUC5;P55060-2	1.0075	P12532;P12532-2;J3KQ93;E9PCP8;F8WCN3;P17540;C9JSQ1	0.90177	P04181;P04181-2	0.97541	O43399;O43399-5;Q5JWU6;O43399-2;O43399-4;O43399-3;O43399-6	1.0082	O43390;O43390-2;Q2L7G6;E7ETM7	1.004	P07355;H0YN42;P07355-2;H0YMD0;H0YMU9;A6NMY6;H0YKS4;H0YM50;H0YMM1;H0YNP5;H0YN28;H0YL33;H0YKZ7;H0YLV6;H0YMT9;H0YKX9;H0YKL9;H0YMW4;H0YNA0;H0YKV8;H0YMD9;H0YN52;H0YNB8;H0YKN4;H0YLE2	0.97501
P55072;C9JUP7;C9IZA5	0.9413	P12955-2;P12955;P12955-3	1.1249	P04350;M0R2D3;M0R278;M0QY85;M0R0X0;M0QY37;M0QX14;M0QZL7;M0QYM7;M0R1I1;M0R042;M0R2T4;F8W813	1.0676	O43447;C9JQD4;H0YEL5;A6NNE7;A6NM32	0.89192	O43399;O43399-5;Q5JWU6;O43399-2;O43399-4;O43399-3;O43399-6	1.0174	Q5JP53;P07437;Q5ST81;E9PBJ4;I3L2F9;A6NNZ2;A6NKZ8;Q9H4B7;CON__ENSEMBL:ENSBTAP00000025008;G3V5W4;G3V2R8;G3V3R4;G3V2N6	1.02
P55145	0.80742	P12956;B1AHC9;B1AHC8;F5H1I8	0.95913	Q5SRN7;P13746;P04439;Q5SRN5;P13746-2;P05534;P30455;P30443;A2BDY9;P30459;P10314;P30447;P16188;B0UXQ1;A9R9N8;A2ARK8;Q29960-2;B0S7Z4;P30512;P30457;P30456;P30453;P30450;P18462;P16190;P16189;P10316;P01892;P01891;B0UXQ0;Q29960;P30508;Q5SPM3;A9R9N7;B0S7Z5;B0S7Z6;Q29940;P30685;P30498;P30495;P30493;P30492;P30491;P30490;P30484;P30464;P18465;P18464;P10319;Q09160;P30510;P30504;Q9TNN7;Q07000;P30505;P30501;A2B…	0.9395	O43464-4;O43464-3;O43464	NaN	O43447;C9JQD4;H0YEL5;A6NNE7;A6NM32	0.88129	P07737;K7EJ44;CON__P02584;I3L3D5	1.0205
P55795	0.88506	P13010;C9JZ81;H7C0H9	1.0473	P04818	0.87778	O43491;E9PPD9;E9PHY5;O43491-3;E9PK52;O43491-2;E9PII3;H0Y5B0;Q6R5J7;Q6ZSX4;E9PQD2;E9PN54;E9PMV8;E9PJP4;E9PPC9;E9PQN0;J3KT37;E9PRG1;E9PIG0;E9PMG5;Q4VXN0;Q9H4G0-4;Q9H4G0-3;Q9H4G0-2;Q9H4G0	1.0513	O43491;O43491-2;E9PII3;O43491-3;E9PK52;E9PPD9;E9PHY5;E9PQD2;Q6ZSX4;H0Y5B0;Q6R5J7;E9PJP4;E9PPC9;E9PQN0;J3KT37;E9PRG1;E9PIG0;E9PMG5;E9PN54;E9PMV8;Q9Y2J2-3;Q9Y2J2-2;F5GX05;Q9Y2J2	1.0742	P07741;H3BQZ9;P07741-2;H3BQB1;H3BQF1;H3BSW3	0.87743
P55884;P55884-2;C9JZG1;C9JQN7	0.96945	P13489;E9PMJ3;E9PLZ3;E9PIM9;E9PIK5;H0YCR7;E9PMA9;E9PMN0;E9PR82;E9PMI1	1.0571	P04843;B7Z4L4;F8WF32	1.1015	O43504;E9PLX3	1.0708	O43504;E9PLX3	1.102	P07814	0.92114
P56192;A6NC17;H0YIP0;H0YHV5;B3KVK7;H0YIC2;H0YHL6;H0YI94;H0YI27	0.87139	P13639	1.0678	P04844-2;P04844;Q5JYR4;Q5JYR7;F2Z3K5;Q5JYR3;H0Y5M1	0.93287	O43505	1.017	O43583;F8VVL1	0.92436	P07858	0.6728
P56385	4.8047	P13667	0.92525	P05114;F2Z2W6;F2Z2Y5;H7BXJ5;A6NEL0;A6NL93	0.84334	O43583;F8VVL1	1.0635	O43592;F8WDU6;F5GYW6;F5GZM3	0.98017	P07900;P07900-2;Q86U12;G3V2J8;Q58FG0;Q14568;Q58FG1	0.95915
P56537;B7ZBH1;B7ZBG9	0.94541	P13693;Q5W0H4;Q8TBK7;J3KPG2;E9PJF7;Q56UQ5;H0YCX0;Q9HAU6	1.0291	P05141;Q9H0C2	1.0733	O43592;F8WDU6;F5GYW6	0.93295	O43615;M0QXU7;M0R301;M0QXM9;M0R124	0.89984	P07910	1.0114
P60174-1;P60174;P60174-4	0.99929	P13797;B7Z6M1;B4DGB4;F8W8D8;B4DI60;H7C4N2;P13796;Q14651;Q5TBN3;C9JAM8;F2Z2Z9	0.96542	P05198;H0YJS4;G3V4T5	0.97388	O43615;M0QXU7;M0R301;M0R124;M0QXM9	0.94387	O43657	NaN	P07919	0.96792
P60228;E5RGA2;E5RHS5;H0YAW4;H0YBR5;H0YBP5;E5RII3;E5RIT4	0.8909	P13804;P13804-2;H0YLU7;H0YK49;H0YL12;H0YNX6;H0YKF0;H0YL83;J3KN60	0.8722	P05204;Q15651-2	0.6945	O43657	0.91595	O43678	0.99087	P07954-2;P07954	0.90918
P60842;J3KT12;P60842-2;J3KSZ0;J3QS69;J3KTB5;J3QL43;E7EQG2;Q14240;Q14240-2;J3KTN0;J3QR64;Q9NZE6;J3QLN6;J3KS25;J3QKZ9;J3QL52;J3KSN7;J3KT04;J3KS93;E7EMV8;B4E102	1.0566	Q9BUB1;P13861;H7C330;H7C1L0;C9J830;P31323	2.1944	P05386	0.71867	O43665-3	NaN	O43681;K7ERW9	1.0008	P08107;P08107-2;E7EP94;Q5SP16	0.97857
P60866;P60866-2;E5RIP1;E5RJX2;G3XAN0	1.0175	P14174	0.96993	P05387	0.98771	O43678	0.87104	O43707;D6PXK4;F5GXS2;H7C144;K7EJH8;K7EP19	0.98117	P08237;P08237-3;P08237-2;F8VSL1;F8VX13;F8VNX2;F8VZQ1	0.97798
P60891;B1ALA9;B4DNL6;P21108;B1ALA7;P11908;P11908-2;A6NMS2;H7C518;H7C540;D3YTJ7	1.1234	P14550;Q5T621	0.97144	P05388;Q3B7A4;F8VWS0;F8VU65;F8VW21;F8VPE8;G3V210;Q8NHW5;F8VQY6;F8VRK7;F8VZS0;F8VWV4;F8VS58;F8W1K8	0.93611	O43681;K7ERW9	0.95646	O43719;Q5H919;Q5H918	0.86736	P08238;Q58FF7;Q5T9W8;H0Y6E4;H0Y5S7;H0Y598;Q58FF6	0.98559
P60903	0.95828	P14618;P14618-2;P14618-3;H3BTN5;H3BQ34;Q504U3;H3BSU3;H3BUW1;H3BTJ2;H3BT25;H3BU13;H3BN34;H3BQZ3;P30613-2;P30613	0.9766	P05783;F8VZY9;CON__P05784;C9JM50;P08727;CON__P08727;CON__P19001	0.98383	O43707;D6PXK4;F5GXS2;H7C144;K7EJH8;K7EP19	1.004	O43765;K7EMD6;K7ERW5	0.93487	P08240-2;P08240	0.91345
P61006	1.0327	P14625;H0YIV0;Q58FF3;F8W026	0.98928	P05976-2;P05976;P08590	2.1282	O43719;Q5H919;Q5H918	0.92553	O43776;B4DN60;K7EQ35;K7EMQ6;K7EIU7;K7EPK2;B4DG16;K7EJ19	0.96183	P08243-2;P08243;P08243-3;F8WEJ5;C9J057;C9JT45;C9JLN6;C9JM09	0.80674
P61026;H0YLJ8;H0YL94;H0YMN7;H0YNE9;F5GY21;P51153;Q92930;B4DEK7;P59190-2;P59190	0.84737	P14854;K7EQD3	1.3022	P06132;H0Y5R6;Q5T446	0.87384	O43765;K7EMD6;K7ERW5	0.99231	O43809;H3BND3;H3BV41	0.99025	P08559-3;P08559;P08559-4;P08559-2;Q5JPU3;Q5JPU0;Q5JPU1;P29803;Q5JPT9	1.0851
P61081;M0QX69;M0QYI6	0.99376	P14866;P14866-2;M0QXS5;M0QYT0;M0R1W6;M0R076;M0QYL7;H7C464	0.99176	P06280	1.1068	O43776;B4DN60;K7EQ35;K7EMQ6;K7EIU7;K7EPK2;B4DG16;K7EJ19	0.97036	O43837-2;O43837;O43837-3	0.99544	P08574	1.1214
P61088;F8VQQ8;F8VSD4;F8VV71;Q5JXB2;F8VZ29	0.98437	P14868;Q68CR9;H7BZ35;C9J7S3;C9JLC1;C9JQM9;H7C278	1.0404	P06493;P06493-2;E5RIU6;K7ELV5;E7ESI2;P24941-2;P24941;Q00526;G3V5T9;G3V317;K7EJ83;H0YAZ9;E7EUK8;Q96Q40-2;P50750;Q96Q40-4;E5RGN0;Q96Q40-3;O94921-3;F8W6H8;Q96Q40;O94921-2;O94921;F5H6Z0;P50750-2;Q00536;Q00536-3;Q00537-2;Q00537;Q00536-2;J3QSD7;Q9NYV4-3;Q14004-2;Q9NYV4-2;Q9NYV4;Q14004	0.94968	O43809;H3BND3;H3BV41	0.97093	O43852;O43852-3;O43852-5;O43852-2;O43852-4;H0Y875;O43852-15;O43852-6;O43852-13;O43852-14;O43852-9;O43852-11;O43852-10;O43852-12;O43852-7;O43852-8	0.99545	P08621-2;P08621;P08621-3;M0QYR1;M0QX04;P08621-4	0.89919
P61158;F8WEW2;F8WE84;F5H3P5;B4DXW1	1.1099	P15121;E9PCX2;E9PEF9;C9JRZ8-2;C9JRZ8	1.0373	P06576;F8VPV9;H0YH81;F8W079;F8W0P7;H0YI37;F8VQY0	0.99748	O43837;O43837-2;O43837-3	0.98041	O43895	2.0148	P08670;B0YJC4;B0YJC5;Q5JVS8;H7C5W5;P41219;P17661;P41219-2;Q16352;P07197-2;E7EMV2;E7ESP9;P07197;P12036-2;P12036	0.82196
P84077;P61204;B7ZB63;H0YGG7;F5H423;F5H0C7	0.91352	P15311;E7EQR4	1.0632	P06733;P06733-2;K7EM90;K7EQF3;K7EN23;P13929-3;B7Z2X9;P13929-2;P13929;P09104;E5RI09;E5RG95;K7EPM1;K7EKN2;E5RGZ4;F5H0C8;F5H1C3;F5H5U1;F5GWQ3;F5GZ30	1.0092	O43852;O43852-3;O43852-5;O43852-6;O43852-2;O43852-4;O43852-13;O43852-14;O43852-11;O43852-10;H0Y875;O43852-9;O43852-15;O43852-12;O43852-7;O43852-8	0.95776	O60216;E5RG18;E5RI01;E5RFZ5;Q9H4I0	1.2538	P0CW22;P08708;H0YN88;H0YK46;H0YN73	1.0312
P61221;D6R9I9	1.08	P15374;Q5TBK7	0.88661	P06737-2;P06737;E9PK47;E9PMM6;P11217-2;P11217;H0Y4Z6	0.96552	O43865-2;O43865;Q96HN2-4;Q96HN2-3;D7UEQ7;H0Y8B3;F8W7N8;Q96HN2-2;Q96HN2	1.0247	O60220	1.1213	P08754;P63096;P04899;P04899-4;A2A2R6;Q5JWD1;H0Y7E8;Q5JWE9;H0Y7F4;F5GZL8;P63096-2;B4E2X5;P04899-3;P04899-2;B3KTZ0;P11488;P19087;P09471-2;P09471;A8MTJ3;P38405;P38405-2	1.1407
P61224-2;P61224-3;P62834;P61224;F5H823;B7ZB78;F5GZG1;P61224-4;A6NIZ1;F5H4H0;F5GYH7;F5H077;F5GWU8;F5H491;F5H0B7;F5H500;F5H6R7;F5H004;F5GYB5;F5GX62;E7ESV4;F5H7Y6	1.2182	P15531;P15531-2	1.0491	P06744;P06744-2;K7EP41;K7ELR7;K7ERC6;K7ENR8;K7ERK8;K7EIL4;K7ESF4	0.95849	O43933;E9PE75	0.75527	O60264;F6TQG2;P28370-2;P28370	0.95441	P08758;D6RBL5;E7ENQ5;D6RBE9;E9PHT9;D6RCN3	0.97213
P61247;D6RG13;D6RAT0;F5H4F9;D6RB09;E9PFI5;H0Y9Y4;H0Y8L7;D6R9B6;D6RAS7;D6RED7;D6RGE0;D6RI02	1.0957	P15880;H0YEN5;E9PQD7;E9PMM9;I3L404;E9PM36;E9PPT0;H3BNG3;H0YE27	1.1021	P06748;P06748-3;P06748-2;E5RI98;E5RGW4	1.0076	O60220	1.1032	O60271-4;O60271-9;O60271-2;O60271;O60271-5;O60271-3;D6RHI8;E9PFH7;Q9UPT6	1.0185	P09012;M0R221;M0R2B8;M0QZG7;M0R268;M0R0G9;M0QXK2;P08579	0.86935
P61254;J3KTJ8;J3QRI7;J3QQQ9;J3QQV1;E5RIT6;J3QRC4;Q9UNX3;J3KSS0;E5RHH1;J3KS10	0.97306	Q5TEJ7;P15927;P15927-2;P15927-3	1.0306	P06753-2;Q5VU59;P06753-3;Q5VU66;Q5VU58;Q5VU61;Q5VU72;J3KN67;D6R904;P06753;Q5VU63;K7EP68;K7ERG3;H0YL80;H0YKX5;H0YKP3;H0YNC7;P09493-2;P09493-5;F5H7S3;H7BYY1;H0YK48;H0YL52;B7Z596;P09493-7;P09493-6;P09493-4;P09493-3;P09493;D9YZV8;D9YZV3;D9YZV2;Q6ZN40;D6RFM2;A6NL28-2;A6NL28	1.0242	O60231;B0V0F8;Q5SQH5;Q5JP46;B0V0F7;A2AB15	1.0634	O60343-2;O60343-3;O60343;O60343-4;O60343-5	0.9768	P09132	0.83393
P61289;P61289-2;B3KQ25;K7ESG5;K7EMD0;K7EPX6;K7EKR3;K7ENH2;B7Z8D3	0.93885	P16152;B4DFK7;E9PQ63;A8MTM1;O75828	0.95224	Q16778;P33778;P23527;P06899;Q8N257;Q6DRA6;Q6DN03	0.93725	O60256;E7EPA1;B4E329;O60256-3;O60256-2;C9JDH0;I3L4G9;E7EW35;C9JDU5;C9JJS3;C9K0K7;I3L331;I3L164;I3L0S1	0.80274	O60493-2;O60493-4;O60493;O60493-3	1.1695	P09211;A8MX94	0.93942
P61313;E7EQV9;E7ENU7;E7EX53;P61313-2;E7ERA2	1.8475	P16402	NaN	P07108;P07108-3;P07108-2;P07108-4;P07108-5	1.0889	O60264	0.97516	O60506;O60506-2;O60506-3;O60506-4;O60506-5;F6UXX1	1.0581	P09234	1.0182
P61353;K7ELC7;K7EQQ9;K7ERY7	1.0621	P16403	0.35877	P07195;A8MW50;C9J7H8;F5H793	1.0078	O60271-4;O60271-5;O60271-9;O60271-2;O60271;O60271-3	1.0463	O60573;B8ZZL3;C9JEL3;B9A044;B8ZZJ9;B8ZZ50	0.92362	P09417;H0Y8F7;B7Z415;D6RGG7;B3KW71	0.66509
P61586;Q5JR07;C9JNR4;E9PQH6;C9JX21;Q5JR08;P08134;Q5JR05;E9PN11	0.94249	P16435;E7EMD0;F5H468;E7EVY7;H0Y4R2	1.0672	P07196	1.3152	O60306;H0YH15	0.97281	O60678;O60678-2	1.093	P09429;Q5T7C4;Q5T7C6;Q5T7C0;B2RPK0;P23497	0.98425
P61604;B8ZZL8;B8ZZ54	1.0195	P16615;P16615-5;P16615-2;P16615-3;H7C5W9;P16615-4;B3KY17;O14983-2;Q93084-4;Q93084-2;O14983;Q93084-3;Q93084-7;Q93084;Q93084-6;Q93084-5;F8VSH0	1.0018	P07203	0.99877	O60343-2;O60343-3;O60343	1.3078	O60684;F5H4G7;F5GYL8;Q5TFJ7;O15131;H0Y3K0	0.97616	P09496-2;P09496-4;P09496-3;P09496;F5H6N3;F8WF69;C9J8P9	0.95529
P61964	1.0543	P16949;A2A2D0;P16949-2;B7Z2Z7;Q9H169;G5EA16;Q9H169-2;E5RIR6;E7EVN3	0.91795	P07237;I3L2P8;F5H8J2;H7BZ94;H0Y3Z3;I3L398;I3L312;I3L4M2;I3NI03;I3L0S0;I3L3U6;I3L3P5;I3L1Y5;I3L514	0.93683	O60493-2;O60493-4;O60493;O60493-3	1.153	O60701-2;O60701;O60701-3;E7ER95;E7ER83;E7ETF4;E7EV97	0.98549	P09543-2;P09543;K7ERC4	0.64704
Q5T6W5;P61978-3;P61978;P61978-2;Q5T6W2;Q5T6W1	0.9698	P16989;P16989-3;Q9Y2T7;H0YG22	0.75501	P07305;P07305-2	0.53011	O60506;O60506-2;O60506-3;O60506-4;O60506-5;F6UXX1	1.0474	O60739	0.79305	P09622;B4DT69;E9PEX6;B4DHG0;F8WDM5;F2Z2E3	1.0043
P61981	0.97107	P16989-2	0.79973	P07339;H7C469;F8WD96;C9JH19;H7C1V0;F8W787	1.0092	O60566;O60566-3;H3BTB9;O60566-2	NaN	O60763;O60763-2;F5H4X1;F5GYR8;F5GZ76;H0Y7C0;REV__Q5VZ89-5;REV__Q5VZ89-6;REV__Q5VZ89	1.0054	P09661;H0YKK0;H0YMA0;H0YLR3	0.92065
P62072	NaN	P17066;P48741	0.97017	P07355;H0YN42;P07355-2;H0YMD0;H0YMU9;A6NMY6;H0YKS4;H0YM50;H0YMM1;H0YNP5;H0YN28;H0YL33;H0YKZ7;H0YLV6;H0YMT9;H0YKX9;H0YKL9;H0YMW4;H0YNA0;H0YKV8;H0YN52;H0YMD9;H0YNB8;H0YKN4;H0YLE2	0.99136	O60573;B8ZZL3;C9JEL3;B9A044;B8ZZJ9;B8ZZ50	0.99655	O60783	0.91999	P09669	1.2098
P62081;B5MCP9	1.0843	P17096-2	0.63576	P07384;E9PL37;E9PRM1	0.91719	O60678-2;O60678	1.0438	O60832-2;O60832;H7C0M1;C9IYT0;H7C2Q9;H7BZF2;H7C2Q2	0.98012	P09874;Q5VX84;Q5VX85	0.93407
P62136;E9PMD7;F8VR82;A6NNR3;F8VYE8;P36873;F8W0W8;P36873-2;P62136-2;E7ETD8;P62140;C9J9S3;C9JP48;B4DNE3;F8W0V8	1.1018	P17174;B7Z7E9	0.83147	Q5JP53;P07437;Q5ST81;E9PBJ4;I3L2F9;A6NNZ2;A6NKZ8;G3V2A3;Q9H4B7;CON__ENSEMBL:ENSBTAP00000025008;G3V5W4;G3V2R8;G3V3R4;G3V2N6	1.0021	O60684;F5H4G7;F5GYL8;O15131;Q5TFJ7;H0Y3K0	1.0905	O60841	0.9255	P09936;D6RE83;D6R956;D6R974;D6RF53	0.84743
P62195;P62195-2;J3QQM1;J3QSE0;J3KRP2;J3QSA9;J3KTQ9;J3QRW1;J3QLH6	0.96931	P17812;B4DR64;B7Z9C4	0.88408	P07737;K7EJ44;CON__P02584;I3L3D5	1.0348	O60701-2;O60701;O60701-3;E7ER95;E7ER83;E7ETF4;E7EV97	1.0696	O60869-2;O60869	0.99897	P09960;P09960-4;P09960-2;P09960-3;B4DEH5	0.95699
P62241;Q5JR95	1.0591	P17858;P17858-2	1.0265	P07814	0.88639	O60739	0.77346	O60884;H3BMW5	1.0611	P09972;K7EKH5;C9J8F3;J3KSV6;J3QKP5;A8MVZ9	0.93411
P62244;I3L3P7;I3L246;H3BN98;H3BV27;H3BT37;I3L303;H3BVC7	1.0834	P17980;E9PM69;E9PKD5;E9PMD8;E9PN50;E9PS45;E9PLG2	0.85291	P07858	0.99478	O60763;O60763-2;F5H4X1;F5GYR8;F5GZ76;H0Y7C0;REV__Q5VZ89-5;REV__Q5VZ89-6;REV__Q5VZ89	1.0527	O60888-3;O60888;O60888-2;C9IZG4;C9IZQ5	0.98894	Q71UI9;P0C0S5;Q71UI9-3;Q71UI9-4;Q71UI9-2;C9J0D1;C9J386	0.82871
P62258;P62258-2;B4DJF2;I3L3T1;K7EM20;K7EIT4;I3L0W5	0.97602	P17987;E7EQR6;F5H282;E7ERF2;F5GZ03;F5H136;F5GZI8;F5H676;F5GYL4;F5H726;F5H7Y1	0.97548	P07900;P07900-2;Q86U12;G3V2J8;Q58FG0;Q14568	0.95312	O60783	0.73535	O75083;O75083-3;D6RD66	0.96605	Q99878;Q96KK5;Q9BTM1;Q16777;Q6FI13;P0C0S8;P20671;Q9BTM1-2;H0YFX9;A8MQC5;REV__H0Y672;REV__E7EQ67;REV__H7BY63;REV__Q8NB25-4;REV__Q8NB25-2;REV__Q8NB25-3;REV__Q8NB25	0.84028
P62263;H0YB22;E5RH77	0.99558	P18085;C9JPM4;C9JAK5	0.884	P07910	0.6799	O60831;A6NP52;A6NM71	0.9486	O75131;E5RG68;H0YB26;E5RHZ0;E5RJ85;E5RFT7;E5RG97;Q86VY2;Q7Z6C8;Q719H8;Q96FN4;E7ENV7;Q8IYJ1;Q96A23;O95741;Q9UBL6-2;Q86YQ8;Q96A23-2;Q9HCH3;F5GXN1;Q9UBL6	0.99397	P10155-3;Q5LJA0;P10155-4;P10155;P10155-2;G5E9R9;D6RDN1;D6RE09	1.0433
P62266;D6RD47	0.98064	P18206-2;P18206;Q5JQ13;P18206-3;B4DTM7	1.0943	P07919	1.0042	O60832-2;O60832;H7C0M1;C9IYT0;H7BZF2;H7C2Q9;H7C2Q2	0.98619	O75223;M0QZK8;O75223-3;B8ZZK2;H7BZK5;O75223-2;O75223-4	0.91245	P10412	0.35879
P62269;J3JS69	1.0638	P18583-6;P18583-2;P18583-10;P18583-3;P18583-4;P18583-7;P18583;P18583-5;P18583-9;P18583-8;J3QSZ5;H7C1M2	0.88807	P07954-2;P07954	1.0597	O60841	1.0558	O75306-2;O75306;B7Z9L2	1.0083	P10599;P10599-2	1.0695
P62273;P62273-2	1.0669	P18669;P15259;Q8N0Y7	0.99768	P08107;P08107-2;E7EP94;Q5SP16	0.95529	O60869-2;O60869	1.0405	O75340-2;O75340;H0Y9N1;H0Y9X3	0.98016	P10606	0.84292
P62277;J3KMX5;E9PS50	0.99027	P18754;P18754-2;C9JW69;H7C497;C9JRH2;C9JMJ4;C9J3R0;C9JQZ4	0.86386	P08133;P08133-2;A6NN80;E5RK69;E7EMC6;E5RJF5;E5RK63;E5RFF0;E5RJR0;E5RI05;E5RIU8;H0YC77	1.0657	O60884;H3BMW5;I3L320	0.96631	O75348;C9JYK3;O95670-2;F2Z307;O95670;C9JRT2	1.0047	P10644;K7EPB2;K7ER48;K7EM13;K7EPR5;K7EQK3;K7EMU2;K7EMZ6;K7EIE5;K7EID3;K7ENR3;K7EJ40;K7EK41	0.88931
P62280;M0QZC5;M0R1H5;M0R1H6	1.0127	P18859;P18859-2;A8MUH2	0.87449	P08237;P08237-3;P08237-2;F8VSL1;F8VX13;F8VNX2;F8VZQ1;F8VP00	1.1567	O75083;O75083-3;D6RD66	1.049	O75367-2;O75367-3;O75367;B4DJC3;D6RCF2	0.89698	P10768;H7BZT7	1.0327
P62304;A6NHK2	1.0542	P19338;H7BY16;C9JYW2;C9JLB1;C9J1H7;C9JWL1	1.0018	P08238;Q58FF7;Q5T9W8;H0Y6E4;H0Y5S7;H0Y598	0.96605	O75131;E5RG68;H0YB26;E5RHZ0;E5RJ85;E5RG97;E5RFT7;Q86VY2;Q7Z6C8;Q719H8;Q96FN4;E7ENV7;Q8IYJ1;Q96A23;O95741;Q9UBL6-2;Q86YQ8;Q96A23-2;Q9HCH3;F5GXN1;Q9UBL6	0.96631	O75368	0.81416	P10809;E7ESH4;E7EXB4;B7Z712;C9JL25;C9JCQ4;C9JL19;C9J0S9	1.0766
P62306;F8W0W6	1.4835	P19387	0.73374	P08240-2;P08240	0.76021	O75145-2;O75145	0.8266	O75369-6;O75369-3;O75369-2;O75369-9;O75369;O75369-8;O75369-5;O75369-4;E7EN95;O75369-7;H7C5L4	0.94522	P11021	0.9025
P62316;P62316-2;K7ERG4	0.95137	P19388	0.89664	P08243-2;P08243;P08243-3;F8WEJ5;C9J057;C9JLN6;C9JM09;C9JT45	0.85031	O75223;M0QZK8;O75223-3;B8ZZK2;H7BZK5;O75223-2;O75223-4	0.94949	O75396	0.98989	P11142;E9PKE3;E9PNE6;P11142-2;A8K7Q2;E9PN89;E9PLF4;E9PQQ4;E9PQK7;E9PK54;E9PS65;P54652;E9PPY6;E9PN25;E9PM13;E9PI65;E9PSH5	1.0878
P62333;H0YJE9;H0YJT1;H0YJC0	0.96415	P19623;K7EL89;K7EKM4;K7EQ47	1.0159	P08559-3;P08559;P08559-4;P08559-2;Q5JPU3;Q5JPU0;Q5JPU1;P29803;Q5JPT9	1.1567	O75306-2;O75306;B7Z9L2	0.95087	O75400-2;O75400-3;O75400;F5H578;H7C2N3;H0YG38	0.97698	P11172;P11172-2;B5LY68;E9PFD2;F2Z3P2;F2Z303;F8WDG4;B5LY72	0.97649
P62424;Q5T8U2;Q5T8U3	0.76633	P20020-5;P20020-2;P20020-6;P20020-3;P20020-4;P20020;E7ERY9;P23634-5;P23634-4;P23634-3;P23634-2;P23634-7;P23634-6;P23634-8;P23634	0.58879	P08574	1.1704	O75340-2;O75340;H0Y9N1;H0Y9X3	0.93055	O75436;G3V1N8;F5H4L7;O75436-2	0.97705	P11177-2;P11177;P11177-3;C9J634;F8WF02	0.98162
P62495;Q96CG1;B7Z7P8;D6RCB3;D6RJE8;I3L492	1.0128	P20042	0.94685	P08579	1.0972	O75348;C9JYK3;O95670-2;F2Z307;O95670;C9JRT2	0.99064	O75438;O75438-2	1.1976	P11216	0.79455
P62701;A6NH36;C9JEH7;P22090;Q8TD47;C9JQ55	1.0485	P20290-2;P20290;D6RDG3;H0Y9Y1	1.0888	P08621;P08621-2;P08621-3;M0QYR1;M0QX04;P08621-4	0.95965	O75367-2;O75367-3;O75367;B4DJC3;D6RCF2	0.92354	O75439;G3V0E4;E7ERZ4;F8WAZ6;F8WEA6;F8WBE1	1.0016	P11387;E5RIC7;Q969P6-2;Q969P6	0.79956
P62750;H7BY10;K7EJV9;K7ERT8;A8MUS3;K7EMA7	0.99887	P20618	0.88154	P08670;B0YJC4;B0YJC5;Q5JVS8;P17661;H7C5W5;P41219;P41219-2;Q16352;P07197-2;E7EMV2;E7ESP9;P07197;P12036-2;P12036	0.91977	O75368	0.8747	O75449-2;O75449;B7ZBC9;B7ZBC8;Q9BW62	1.2647	P11388;P11388-2;P11388-3;P11388-4;J3KTB7	0.8214
P62753;A2A3R5;A2A3R7	1.035	P20674;H3BNX8;H3BRM5;H3BV69;H3BRI0	1.1067	P0CW22;P08708;H0YN88;H0YK46;H0YN73;H3BNC9	0.98623	O75369-6;O75369-3;O75369-2;O75369-9;O75369;O75369-8;E7EN95;O75369-7;O75369-5;O75369-4;H7C5L4	0.94832	O75475;O75475-3;O75475-2;H3BPQ6;Q9Y3E1	0.80107	P11413;P11413-3;P11413-2;E9PD92;E7EM57;E7EUI8	0.89684
P62805	1.0599	P20700;E9PBF6	1.1201	P08754;P63096;P04899;P04899-4;A2A2R6;Q5JWD1;H0Y7E8;Q5JWE9;H0Y7F4;F5GZL8;P63096-2;B4E2X5;P04899-3;P04899-2;B3KTZ0;P11488;P19087;P09471-2;P09471;A8MTJ3;P38405;P38405-2	1.0714	O75380;D6RBT3	1.1114	O75489;B4DFM8;E9PS48	0.96056	P11766;H0YAG8;D6RAY0;D6R9G2;D6RFE4	1.155
P62829;C9JD32;J3KT29;B9ZVP7;J3KTJ3;J3QQT9	0.93732	P20962;F5H7R9;F5GXR3	0.67892	P08758;D6RBL5;E7ENQ5;D6RBE9;E9PHT9;D6RCN3	0.93675	O75396	0.9466	O75494-5;Q5JRI1;O75494-4;O75494-6;O75494-3;O75494-2;O75494	0.92887	P11802;F8VXD2;F8VYH9;B4DNF9;F8VZZ0;F8VTV8;F8VWX7;F8VZ51;F8VZ13;F8W1L8	1.3722
P62851	1.0209	P21266	1.0577	P09012;M0R221;M0R2B8;M0QZG7;M0R268;M0R0G9;M0QXK2	0.83337	O75400-2;O75400-3;O75400;F5H578;H7C2N3;H0YG38	0.95083	O75503	1.0391	P11940;P11940-2;E7EQV3;E7ERJ7;H0YBQ4;H0YAR2;Q9H361;H0YBN4;H3BNY3;E5RGH3;E5RH24;E5RJB9;H0YAP2;H0YB86;H3BPI5;Q4VXU2;H0YAS6;H0YB75;Q4VY17;E5RHG7;H0YAS7;Q96DU9;H0YC10;E5RGC4;E5RFD8	1.0765
P62854;Q5JNZ5	1.1208	P21281;H0YC04;C9J5E3;C9JNS9;C9JL73;P15313	1.3196	P09132	0.93742	O75436;G3V1N8;O75436-2;F5H4L7	0.97575	O75521-2;O75521;C9J000;F8WAW4;F1LLU7;C9JB63	1.0295	P12004	0.93821
P62857	1.1182	P21333-2;P21333;Q5HY54;E9PHF0;F8WE98;H0Y5F3;H0Y5C6	0.92861	P09211;A8MX94	0.96145	O75438;O75438-2	NaN	O75531	0.9444	P12235	1.4446
P62875	1.199	P21796;C9JI87	0.98917	P09234	1.0045	O75439;G3V0E4;E7ERZ4;F8WEA6;F8WBE1;F8WAZ6	1.0528	O75533;H7C341;O75533-2;B4DGZ4	1.0129	P12236;I7HJJ0	1.0951
P62877	1.033	P21912	1.089	P09417;B3KW71;H0Y8F7;B7Z415;D6RGG7	1.2791	O75449-2;O75449;B7ZBC9;B7ZBC8;Q9BW62	0.81746	O75607	1.0435	P12268;H0Y4R1;E7ETK5;C9K0R9	0.92252
P62879;C9JZN1;C9JIS1;C9JXA5;E7EP32;P62873;Q9HAV0;B1AKQ8;F6X3N5;F6UT28;C9JD14;F5H100;F5H8J8;B3KVK2;B3KPU1;F5H0S8;E9PCP0;P16520	0.89519	P21964-2;P21964;E7EMS6	0.98856	P09429;Q5T7C4;Q5T7C6;Q5T7C0;B2RPK0;P23497;P0C6E5	0.95884	O75475;O75475-3;O75475-2	0.84547	O75629	1.0836	P12270	1.0197
Q59GN2;P62891	1.0432	P22087;M0R299;M0QXL5;M0R0P1;M0R2Q4;M0R2U2;M0R1H0;M0R2B0;A6NHQ2	0.96404	P09496-2;P09496-4;P09496-3;P09496;F8WF69;F5H6N3;C9J8P9	0.96058	O75489;B4DFM8;E9PS48	0.92	O75643;O75643-2;C9JAQ9;B4E0P5	0.99858	P12277;G3V4N7;H0YJG0;G3V461;H0YJK0;G3V2I1	0.96208
P62906	1.1157	P22102;P22102-2;F8WD69;C9JBJ1;C9JTV6;B4DJ93;C9JZG2;C9JKQ7;H7C366;H7C489;H7C5I9	0.9761	P09543-2;P09543;K7ERC4	1.1223	O75494-5;Q5JRI1;O75494-4;O75494-6;O75494-3;O75494-2;O75494	0.87282	O75663;O75663-2	0.9887	P12532;P12532-2;F8WCN3;J3KQ93;E9PCP8;C9JSQ1;P17540;C9JJX8;C9J995;C9J8F6	0.99029
P62913;Q5VVC9;Q5VVC8	1.0008	P22234;E9PBS1;P22234-2;D6RF62	0.97497	P09622;B4DT69;E9PEX6;B4DHG0;F8WDM5;F2Z2E3	1.0382	O75521-2;O75521;F1LLU7;C9J000	1.2443	O75688-3;O75688	0.74069	P12955-2;P12955;P12955-3	0.92833
P62917;E9PKZ0;E9PIZ3;E9PKU4;G3V1A1;E9PP36	0.89778	P22314;Q5JRR9;Q5JRS0;Q5JRR6;Q5JRS1;Q5JRS3;Q5JRS2	0.96529	P09661;H0YKK0;H0YMA0;H0YLR3	0.91998	O75531	0.94139	O75691	1.1078	P12956;B1AHC9;B1AHC8;F5H1I8	0.97721
P62937;F8WE65;C9J5S7;Q567Q0;E5RIZ5	1.0327	P22392-2;Q32Q12;P22392;J3KPD9;E7ERL0;F6XY72;E5RHP0;O60361;C9K028	1.0129	P09669	1.1186	O75533;H7C341;O75533-2;B4DGZ4;F8WC19	0.97709	O75717;C9JYB3;F8W7P7;C9JW18	1.5444	P13010;C9JZ81;H7C0H9	1.0137
P62942;Q1JUQ5;Q5W0X3	0.98224	P22626;P22626-2	1.0492	P09874;Q5VX84;Q5VX85	0.95828	O75607	0.97325	O75792	0.66725	P13489;E9PMJ3;E9PLZ3;E9PIM9;E9PIK5;H0YCR7;E9PMN0;E9PMA9;E9PR82;E9PMI1	0.96154
P62979	0.87136	P22695;H3BRG4;H3BSJ9;H3BP04;H3BUE4;H3BUI9	1.0607	P09936;D6RE83;D6R956;D6R974;D6RF53	0.8635	O75629	1.1482	O75794	1.0478	P13639	1.0549
P62993;P62993-2;J3KT38	1.1006	P22830;P22830-2;K7EPN2;K7EKP7;K7ELX4	1.1544	P09960;P09960-4;P09960-2;P09960-3;B4DEH5	0.9286	O75643;O75643-2;C9JAQ9;B4E0P5	0.97355	O75821;K7ER90;K7EL20;K7ENA8;K7EP16;K7EL60;K7ENH0	0.99603	P13667	0.88623
P62995-3;P62995;H7C2L4;H7BXF3	0.9787	P23193;P23193-2;E5RJ93;E5RIS7;B7Z4S1;Q5JRI7;Q15560	1.0499	P09972;K7EKH5;C9J8F3;J3KSV6;J3QKP5;A8MVZ9	0.92041	O75663;O75663-2	1.007	O75844	0.96677	P13674-3;P13674-2;P13674	0.7523
P63104;E7EX29;E7ESK7;B0AZS6;E7EX24;E5RGE1;E5RIR4;E9PD24;E7EVZ2;B7Z2E6;H0YB80	0.99866	P23246;P23246-2;H0Y9K7;H0Y9U2	1.0223	Q71UI9;P0C0S5;Q71UI9-3;Q71UI9-4;Q71UI9-2;C9J0D1;C9J386	0.82067	O75688-3;O75688	0.9228	O75874;C9J4N6;C9JJE5;C9JLU6	0.91977	P13693;Q5W0H4;Q8TBK7;J3KPG2;E9PJF7;Q56UQ5;H0YCX0;Q9HAU6	1.0608
P63151;P63151-2;Q66LE6	0.68857	P23258;K7EKE5;K7EIS0;Q9NRH3	1.2678	Q99878;Q96KK5;Q6FI13;P0C0S8;Q9BTM1;Q16777;Q9BTM1-2;H0YFX9;A8MQC5;REV__H0Y672;REV__E7EQ67;REV__H7BY63;REV__Q8NB25-4;REV__Q8NB25-2;REV__Q8NB25-3;REV__Q8NB25	0.81641	O75691	1.0748	O75915;F8WF90;C9JQU6;F8WF33	0.96519	P13797;B7Z6M1;B4DGB4;F8W8D8;B4DI60;H7C4N2;P13796;Q5TBN3;F2Z2Z9	0.84196
P63167;F8VXI7;F8VXL2;F8VRV5;Q96FJ2	0.91509	P23284	0.99503	P10155-3;Q5LJA0;P10155-4;P10155;P10155-2;H0Y9N5;D6RDN1;D6RE09;G5E9R9	0.99669	O75792	0.70053	O75934	1.0181	P13804;P13804-2;H0YLU7;H0YL12;H0YK49;H0YNX6;H0YKF0;H0YL83;J3KN60	0.92995
Q5VTU3;P63172	NaN	P23381;P23381-2;G3V277;G3V3H8;G3V3Y5;G3V423;G3V3P2;G3V227;G3V5U1;G3V456;G3V2Y7;G3V5W1;G3V3S7;G3V3X0;G3V2F2;G3V3R3;G3V4S4;G3V313;G3V339;G3V2C0;G3V4C7;G3V4N8;H0YJP3	0.89033	P10253	1.2592	O75794;H7BZW7	0.98086	O75937	0.93488	Q9BUB1;P13861;H7C1L0;H7C330;H7C4A9;C9J830;P31323	0.75252
Q8WVC2;P63220;Q9BYK1;Q9BYK2	1.1204	P23396;J3KN86;E9PL09;E9PPU1;E9PL45;F2Z2S8;H0YCJ7;E9PQ96;E9PJH4;H0YF32;E9PK82;H0YEU2;E9PSF4;E9PQX2;H0YES8	1.0715	P10412;P22492;P16401	0.44594	O75821;K7ER90;K7EL20;K7ENA8;K7EP16;K7EL60;K7ENH0	0.95817	O75940	0.92928	P14174	1.0464
P63244;J3KPE3;D6RHH4;H0YAF8;D6RAC2;H0Y8W2;D6R9Z1;D6R9L0;D6REE5;D6RFX4;H0YAM7;D6RAU2;E9PD14;D6RBD0;D6RFZ9;D6RF23;H0Y8R5;D6RGK8;D6R909;H0Y9P0;D6RHJ5;D6RDI0	1.0331	P23434	1.0504	P10599;P10599-2	1.0112	O75844	0.97406	O75947-2;O75947;F5H608	1.0222	P14550;Q5T621	0.98619
P63261;I3L3I4;I3L3I0;I3L1U9;I3L4N8;K7EM38;I3L3R2;J3KT65;C9JUM1	1.0275	P23511-2;P23511	NaN	P10606	0.95563	O75874;C9J4N6;C9JJE5;C9JLU6	0.99956	O75976-2;O75976	NaN	P14618;P14618-3;P14618-2;H3BTN5;H3BQ34;Q504U3;H3BSU3;H3BUW1;H3BTJ2;H3BT25;H3BU13;H3BN34;H3BQZ3;P30613-2;P30613	0.9605
P63313	0.96538	P23526;P23526-2	0.98888	P10619	1.2331	O75915;F8WF90;C9JQU6;F8WF33	0.91195	O76003	0.98609	P14625;Q58FF3;H0YIV0;F8W026	0.94517
P67775-2;P67775;P62714;H0YBN9;H0YC23;E5RI56;E5RFI3;E5RHP4;E7ESG8;E5RHC1	1.0781	P23528;G3V1A4;E9PP50;E9PK25;E9PQB7;E9PLJ3;E9PS23	0.97205	P10644;K7EPB2;K7ER48;K7EM13;K7EPR5;K7EQK3;K7EMU2;K7EMZ6;K7EIE5;K7EID3;K7ENR3;K7EJ40;K7EK41	1.3266	O75934	1.2187	O76021;J3QSV6;I3L3U9;I3L3C4;B4DJ58;I3L234	1.1135	P14735;P14735-2;Q5T5N3	1.0089
P67809;H0Y449;C9J5V9	0.99371	P24534;F2Z2G2;C9JZW3;F8WF65	1.0011	P10768;H7BZT7	0.95442	O75937	1.0023	O76031	1.0317	P14854;K7EQD3	0.98431
P67936;P67936-2;K7EMU5;K7EPV9;H0YK20;H0YL42;K7EPB9	1.1412	Q5QNZ2;P24539	0.96463	P10809;E7ESH4;E7EXB4;B7Z712;C9JL25;C9JCQ4;C9JL19;C9J0S9	1.0439	O75940	0.83408	O76071	NaN	P14866;P14866-2;M0QXS5;M0R1W6;M0R076;M0QYL7;H7C464;Q5JB52;B7WPG3;Q8WVV9-4;Q8WVV9;D6W592	0.94798
P68133;P68032;P63267;P62736;Q5T8M8;A6NL76;Q5T8M7;P63267-2;F8WB63;B8ZZJ2;C9JFL5;F6UVQ4;F6QUT6	0.98646	P24752;E9PRQ6;G3XAB4;H0YEL7	0.95721	P11021	0.9824	O75947-2;O75947;F5H608	1.0319	O76094;O76094-2;D6RDY6	0.93314	P14868;Q68CR9;H7BZ35;C9J7S3;C9JLC1;C9JQM9;H7C278	1.0044
P68104;Q5VTE0;A6PW80;Q5JR01	1.0421	Q6NX41;P24928	1.0079	P11142;E9PKE3;E9PNE6;P11142-2;A8K7Q2;E9PN89;E9PLF4;E9PQQ4;E9PQK7;E9PK54;E9PS65;E9PPY6;P54652;E9PN25;E9PM13;E9PI65;E9PSH5	1.0548	O76003	1.0294	O94760;O94760-2;B4DYP1;B4DGT0	0.99951	P14927;P14927-2;B7Z2R2	0.98882
P68371;A8K854;M0R2D3;M0QY85;M0R0X0;M0QY37;M0QX14;M0QZL7;M0QYM7;M0R042;M0R2T4	0.99495	P25205;B4DWW4;J3KQ69;Q7Z6P5	1.0678	P11172;P11172-2;E9PFD2;B5LY68;F2Z3P2;F2Z303;F8WDG4;B5LY72	0.80075	O76031	0.87547	O94776;Q68DB1	1.0307	P15104	0.50928
P68402;P68402-3;P68402-2;J3KNE3;P68402-4	0.9595	P25398	1.0347	P11177-2;P11177;P11177-3;C9J634;F8WF02	0.99548	O76071	1.1404	O94788-2;O94788;H0YMG7;O94788-3;H0YM00;E9PF31	0.87866	P15121;E9PCX2;E9PEF9;C9JRZ8-2;C9JRZ8	1.0017
P78347-2;P78347-4;P78347-3;P78347	1.4303	P25705-2;P25705;K7EK63;K7ENP3;K7EK77;K7EQT2;K7ERX7;K7EJP1;K7ENJ4;K7EKV9;K7ESA0	1.0059	P11216	1.0984	O76094;O76094-2;D6RDY6	0.89077	O94826	1.0624	P15311;E7EQR4	0.97998
P78371;P78371-2;F5GWF6;F8VQ14	1.0275	P25786;P25786-2;F5GX11;B4DEV8	0.98113	P11233;P11234;Q6ZS74;B4E040;H7C3P7;F8WEQ6;C9JPE8;C9JYR1;C9J6B1;C9JQB3	1.0124	O94760;O94760-2;B4DYP1;B4DGT0	0.93679	O94874-3;O94874	NaN	P15374;Q5TBK7	0.92763
Q5TA02;P78417-3;P78417;Q5TA01;P78417-2	1.0448	P25787;C9JCK5;H7C402;H3BT36;Q6MZI6	0.97519	P11387;E5RIC7;Q969P6-2;Q969P6;E5RJ33;H0YBR3;H0YC03;E5RGE7;E5RGR4;E5RFE3;E5RGR2;E5RJ95;E5RFS0	0.83842	O94776;Q68DB1;F8VSM3;H0Y4T7	1.0881	O94888;C9JAT7;F5GYB1;F8WB69;H7BYF4	0.97971	P15531;P15531-2	0.86207
P80723-2;P80723	0.72309	P25788-2;P25788;G3V4X5	1.0106	P11388;P11388-2;P11388-3;P11388-4;J3KTB7	0.87895	O94788-2;O94788;H0YMG7;O94788-3;H0YM00;Q9UED3;E9PF31;H0YKL3	0.96193	O94906;O94906-2	1.0093	P15880;H0YEN5;E9PQD7;I3L404;E9PMM9;E9PM36;E9PPT0;H3BNG3;H0YE27	1.0946
P82979;F8VZQ9;H0YHG0;Q567R9;F8VS12	1.015	P25789;H0YMZ1;H0YN18;H0YL69;P25789-2;H0YMA1;H0YKT8;H0YMI6;H0YKS0;H0YLS6;H0YLC2	1.015	P11413;P11413-3;P11413-2;E9PD92;E7EM57;E7EUI8	0.86452	O94826	1.0617	O94925-3;O94925;H7BZD1;B8ZZA8;B8ZZC5;C9JIJ6;O94925-2	1.0827	P15927;P15927-2;P15927-3;Q5TEJ7;Q5TEJ0	0.78316
P84085;C9J1Z8	1.1781	P26038	0.95551	P11441;Q5HY81;F8WB70	0.82601	O94874;O94874-2;O94874-3	0.83524	O94973;O94973-2;E9PJJ7;O94973-3;M0R2D9;E9PR62	1.0292	P16152;B4DFK7;E9PQ63;A8MTM1;O75828	0.93933
P84090;G3V279	1.0236	P26196	1.0407	P11766;D6RFE4;D6R9G2	0.86668	O94888;C9JAT7;F5GYB1;F8WB69;H7BYF4	0.98457	O94992	0.76599	P16383-2;P16383	0.79271
P98179	1.0021	P26373;P26373-2;J3QSB4;H3BTH3;J3KS98;H3BUK8	0.9752	P11802;F8VXD2;F8VYH9;B4DNF9;F8VZZ0;F8VTV8;F8VWX7;F8VZ51;F8VZ13;F8W1L8	0.47924	O94906;O94906-2	1.0147	O95163;F5H2T0	0.82036	P16402	0.22969
Q00341-2;Q00341;H0Y394;C9JT62;C9JHS7;C9JK79;C9JHZ8;C9JES8;C9JZI8;C9J5E5;C9JIZ1;H7C2D1;H7C0A4	0.99181	P26583;D6R9A6	0.88419	P11940;P11940-2;E7EQV3;E7ERJ7;H0YBQ4;H0YAR2;Q9H361;H0YBN4;H0YAP2;H3BNY3;H0YB86;E5RGH3;E5RH24;E5RJB9;H3BPI5;H0YAS6;H0YB75;Q4VXU2;E5RHG7;H0YAS7;Q4VY17;H0YC10;E5RGC4;E5RFD8;Q5JQF8;Q96DU9	1.0271	O94925-3;O94925;H7BZD1;B8ZZA8;B8ZZC5;C9JIJ6;O94925-2	1.1002	O95197-3;B7Z4M1;O95197-6;O95197-5;O95197-4;F5H774;O95197-2;O95197	1.011	P16403;P22492;P16401	0.27731
Q00610-2;Q00610;J3KS13;J3KR87;P53675-2;P53675;K7EJJ5;J3KSQ2;J3KRF5;F5H5N6	0.9881	P26599;P26599-2;P26599-3;A6NLN1;K7EK45;K7ES59;K7EKJ7;K7ELW5;Q9UKA9;Q9UKA9-2;Q9UKA9-4;Q9UKA9-3;B4DSS8	0.98154	P12004	0.91066	O94973;O94973-2;E9PJJ7	0.93934	O95202;O95202-2;O95202-3	0.93789	P16615;P16615-5;P16615-2;P16615-3;H7C5W9;P16615-4;B3KY17;O14983-2;Q93084-4;Q93084-2;O14983;Q93084-3;Q93084-7;Q93084;Q93084-6;Q93084-5;F8VSH0	0.94618
Q00688;G3V5F2	1.016	P26639;P26639-2;E7ERI3;G3XAN9;D6RCA5;D6R9F8;D6RDJ6;D6RJ97;D6RHV7;D6RCS6;A2RTX5-2;B7ZLP8;A2RTX5	0.96417	P12235	1.4679	O94992	0.81627	O95218-2;O95218	0.99162	P16949;P16949-2;A2A2D0	0.88964
Q00796;H0YLA4;B7Z3A6;H0YKB3	0.55424	P26641;B4DTG2;E7EMT2	1.0703	P12236;I7HJJ0	1.0768	O95163;F5H2T0;H0YDF3	1.014	O95239;O95239-2;Q2VIQ3	0.59483	P16989;P16989-2;P16989-3;Q9Y2T7;H0YG22	0.88866
Q00839;Q00839-2;Q5RI18	1.0441	P27348;E9PG15	1.0774	P12268;H0Y4R1;E7ETK5;C9K0R9	0.95314	O95197-3;B7Z4M1;O95197-6;O95197-5;O95197-4;F5H774;O95197-2;O95197	1.0276	O95292;E5RK64;O95292-2	0.85226	P17066;P48741	0.99135
Q01081;Q01081-2;Q01081-4;K7EPL9;K7EJH3;K7EJM7;M0QYK5;Q01081-3;K7ERY8;M0R2N4;Q8WU68-3;Q8WU68-2;Q8WU68	1.0072	P27635;F8W7C6;H7C123;B8A6G2;H7C2C5;A6QRI9;Q96L21;H7C2U2	1.0684	P12270	1.0199	O95202;O95202-2;O95202-3	0.97734	O95336;M0R261;M0R1L2;M0R0U3	0.92155	P17174;B7Z7E9	0.84833
Q01082-3;Q01082-2;Q01082	0.83855	P27694;I3L4R8;I3L524;I3L2M5	0.96735	P12277;H0YJG0;G3V4N7;G3V461;H0YJK0	0.96369	O95292;E5RK64;O95292-2	0.92977	O95347;O95347-2;Q5T821	1.0392	P17812;B4DR64;B7Z9C4;Q9NRF8	1.0073
Q49AS9;Q01085;Q01085-2;F8WE16;E7ETJ9;C9JTN7;P31483-2;F8W8I6;P31483	1.202	P27695;G3V3M6;G3V5Q1;G3V3C7;G3V5D9;G3V5M0;G3V359;G3V3Y6;G3V574;H7C4A8	0.86661	P12532;P12532-2;F8WCN3;E9PCP8;J3KQ93;C9JSQ1;C9JJX8;C9J995;C9J8F6;P17540;C9J6W7;C9JT96	1.0293	O95336;M0R1L2;M0R261;M0R0U3	0.95127	O95372;Q5QPQ0;E7EPS4;Q5QPN9;Q5QPQ3;Q5QPQ2;Q5QPN5;Q5QPQ1	0.94374	P17858;P17858-2	0.95154
Q01105-3;Q5VXV2;Q01105-2;Q01105	0.94769	P27797;K7EJB9;K7EL50	1.0299	P12955-2;P12955;P12955-3	1.0308	O95347;O95347-2;Q5T821	1.0285	O95373;E9PLB2;E9PLJ0	1.0148	P17980;E9PM69;E9PN50;E9PMD8;E9PKD5;E9PS45;E9PLG2	0.86248
Q01469;I6L8B7	1.168	P28066;P28066-2	1.0244	P12956;B1AHC9;B1AHC8;F5H1I8	1.006	O95372;Q5QPQ0;E7EPS4;Q5QPN9;Q5QPQ3;Q5QPQ2;Q5QPN5;Q5QPQ1	0.88169	O95399;Q5H8X8;O95399-2	0.74672	P17987;E7EQR6;F5H282;E7ERF2;F5GZ03;F5H136;F5GZI8;F5H676;F5H726;F5GYL4;F5H7Y1	0.96773
Q01518-2;Q01518;Q5T0R1;Q5T0R9;Q5T0R7;Q5T0R6;Q5T0R5;Q5T0R4;Q5T0R3;Q5T0R2;Q5T0S3;Q5T0R8	0.98522	P28070	1.2111	P13010;C9JZ81;H7C0H9	1.0162	O95373;E9PLB2;E9PLJ0	1.0587	O95400	0.99902	P18077;C9K025;F8WBS5;F8WB72	1.0901
Q01813;Q01813-2;B1APP6;Q5VSR6;Q5VSR5;H0Y3Y3;B1APP8	0.96692	P28072;I3L3X7	0.8726	P13489;E9PMJ3;E9PLZ3;E9PIM9;H0YCR7;E9PIK5;E9PMA9;E9PMN0;E9PR82;E9PMI1	1.0938	O95394;D6RCQ8;D6RF12;E9PF86;D6RCD1;D6RF77;H0Y8I3;D6RC77;J3KN95	0.9649	O95433;G3V438;B4DUR9;H0YJ63;H0YJU2;H0YJG7;G3V3W9;H0YJG6	1.0286	P18085;C9JPM4;C9JAK5;F5H1V1;F5H6T5;F8WCJ5;F8WDB3	0.88525
Q02750-2;Q02750;G5E9C7;P36507	0.8665	P28074;P28074-3;H0YJM8;P28074-2	0.99088	P13639	1.0368	O95400	0.86393	O95456-2;O95456;F8WBH7	1.0029	P18124;A8MUD9;C9JIJ5;C9JZ88	1.2106
Q02790;F5H1U3;H0YFG2;F5H120	1.0596	P28838-2;P28838;H0Y9Q1	0.97525	P13667	0.92914	O95433;B4DUR9;G3V438;H0YJ63;H0YJG7;G3V3W9;H0YJU2;H0YJG6	1.039	Q5TIH2;O95562	0.85292	P18206-2;P18206;Q5JQ13;P18206-3;B4DTM7	0.95424
Q02878;F8W181;F8VZ45;F8VZA3;F8VWR1;F8VR69;F8VRY1	1.0938	P29144;Q5VZU9	1.1242	P13674-3;P13674-2;P13674	1.0534	O95456-2;O95456;F8WBH7	0.98585	O95573;H7BYZ7;H7C260	1.0022	P18583-8;P18583-6;P18583-2;P18583-10;P18583-3;P18583-4;P18583-7;P18583;P18583-5;P18583-9	0.81868
Q02952-3;Q02952-2;Q02952	1.0066	P29373	0.91533	P13693;Q5W0H4;J3KPG2;E9PJF7;Q8TBK7;Q56UQ5;H0YCX0;Q9HAU6	1.0525	O95573;H7BYZ7;H7C260	0.97131	O95747;C9JIG9	0.84708	P18669;P15259;Q8N0Y7	0.9753
Q04760;Q04760-2	1.0522	P29401;P29401-2;B4E022;E9PFF2;F8W888;F8WAX4	1.0084	P13797;B7Z6M1;B4DGB4;F8W8D8;B4DI60;H7C4N2;P13796;Q5TBN3;F2Z2Z9	0.97728	O95758-1;O95758-6;O95758-2;O95758;O95758-5;O95758-4;O95758-7	1.0443	O95758-1;O95758-6;O95758-2;O95758;O95758-5;O95758-4;O95758-7	1.0533	P18754;P18754-2;C9JW69;H7C497;C9JRH2;C9JMJ4;C9J3R0;C9JQZ4	1.0031
Q04837;E7EUY5;C9K0U8	1.0699	P29966	0.91479	P13804;P13804-2;H0YLU7;H0YL12;H0YK49;H0YNX6;H0YKF0;H0YL83;J3KN60	0.93746	O95782-2;O95782;O94973-3;M0R2D9;E9PR62	0.96698	O95782-2;O95782	0.7983	P18859;P18859-2;A8MUH2	0.88486
Q04917;F8WEB6;A2IDB1;A2IDB2	0.89828	P30040;F8VY02;P30040-2	1.0019	Q9BUB1;P13861;P31323;H7C330;H7C1L0;C9J830	0.88041	O95793-2;O95793-3;O95793;Q5JW30;Q5JW28;F6UDC6	0.88334	O95793-2;O95793-3;O95793;Q5JW30;Q5JW28;F6UDC6	0.97586	P19338;H7BY16;C9JYW2;C9JLB1;C9J1H7;C9JWL1	0.98462
Q05639	1.0371	P30041	0.93976	P14174	1.0283	O95816;B4DXE2;A2A296	0.88157	O95816;B4DXE2;A2A296	0.92914	P19387	1.1244
Q06203;D6RE15;D6RCC8	0.99284	P30044-2;P30044;P30044-3;A6NC19	0.91304	P14550;Q5T621	0.96626	O95831-3;O95831;O95831-2;E9PMA0;Q1L6K4;O95831-5;O95831-4	0.97325	O95831-3;O95831;O95831-2;E9PMA0;O95831-5;Q1L6K4;O95831-4	0.97637	P19525-2;P19525	1.0548
Q06210-2;Q06210;E5RJP4;O94808	1.0518	P30046;B7Z522;A6NHG4;B5MC82;J3KQ18;H7C342	0.90651	P14618;P14618-3;P14618-2;H3BTN5;H3BQ34;Q504U3;H3BSU3;H3BUW1;H3BTJ2;H3BT25;H3BU13;H3BN34;H3BQZ3;P30613-2;P30613	0.96245	O95881	0.99964	O95881	0.97523	P19623;K7EL89;K7EKM4;K7EQ47	1.075
Q06323;H0YKK6;H0YNE3;A6NJG9;H0YLU2	1.0423	P30049	2.0817	P14625;H0YIV0;Q58FF3;F8W026	0.95599	Q96II6;O96000;H3BV16;H3BPJ9	0.95608	O96000;H3BV16;H3BPJ9;Q96II6	0.96652	P20042	0.95786
Q06830	0.94467	P30050;P30050-2	1.0129	P14735;P14735-2	0.96538	O96008;O96008-2;K7EKG4;K7EJ57	1.141	O96008;O96008-2;K7EKG4;K7EJ57	1.0725	P20290-2;P20290;D6RDG3;H0Y9Y1	1.1476
Q07021;I3L3Q7;I3L3B0	1.0135	P30084	1.0006	P14854	1.0344	O96019-2;O96019;H7C5S0;C9JQT2	0.94078	O96019-2;O96019;H7C5S0;C9JQT2	0.93588	P20618	0.86709
Q07065	0.93318	P30085;Q5T0D2;E9PGI8	1.0594	P14866;P14866-2;M0QXS5;M0R076;M0R1W6;H7C464;M0QYL7	1.0124	P00338;P00338-3;P00338-4;P00338-5;P00338-2;F5H308;F5GYU2;F5GXY2;F5GXH2;F5H5J4;F5H6W8;F5GZQ4;F5H8H6;F5GXC7;F5GWW2;F5GXU1;F5H5G7;F5H155;G3XAP5;F5H245;Q6ZMR3;P07864	1.0576	P00167-2;P00167;P00167-3;J3KNC7	1.0705	P20674;H3BNX8;H3BRM5;H3BV69;H3BRI0	0.95181
Q07666-2;Q07666;Q07666-3;O75525-2;O75525;Q5VWX1	1.0203	P30086	0.92771	P14868;Q68CR9;H7BZ35;C9J7S3;C9JLC1;H7C278;C9JQM9	1.0383	P00367;B4DGN5;B3KV55;P49448	1.0579	P00338;P00338-3;P00338-4;F5H308;P00338-5;P00338-2;F5GYU2;F5GXY2;F5GXH2;F5H5J4;F5H6W8;F5GZQ4;F5H8H6;F5GXC7;F5GWW2;F5GXU1;F5H5G7;F5H155;G3XAP5;F5H245;Q6ZMR3;P07864	1.0608	P20700;E9PBF6	0.94678
Q08211;Q08211-2	1.0322	P30153;F5H3X9;B3KQV6;C9J9C1;E9PH38;E9PPI5;E9PNM7;E9PHZ6	0.95392	P14923	0.71817	P00374;B4DDD2;B4DM58	0.82588	P00367;B4DGN5;B3KV55;P49448	0.9985	P21266	1.0148
Q08945;E9PPZ7;E9PMD4	1.0171	Q2YDB7;P30405	0.55562	P14927;P14927-2;B7Z2R2	1.0249	P00387-2;P00387;P00387-3;B1AHF3	0.93802	P00374;B4DDD2;B4DM58	0.7363	P21281;H0YC04	0.9907
Q08J23-2;Q08J23;G3V1R4;D6RAS3	1.3868	P30419;P30419-2;B7Z8J4;K7EN82;K7EN42	0.85855	P15104	0.70312	P00390-2;P00390;P00390-3;P00390-4;P00390-5;H0YBD4;H0YC68;E5RI06	0.94695	P00387-2;P00387;P00387-3;B1AHF3	0.96659	P21333-2;P21333;Q5HY54;E9PHF0;F8WE98;H0Y5C6;H0Y5F3	0.92278
Q09028-3;Q09028;Q09028-2;Q09028-4;H0YF10;H0YCT5;H0YDK2;H0YEU5;B4DRT0;E9PNS2;E9PIC4;E9PNS6	0.95662	P30520	1.1004	P15121;E9PCX2;E9PEF9;C9JRZ8-2;C9JRZ8	0.96999	P00403	0.96911	P00390-2;P00390;P00390-4;P00390-3;P00390-5;H0YBD4;H0YC68;E5RI06	0.97083	Q9HBB2;P21399	1.4627
Q0VAA8;Q7Z3H0;Q7Z3H0-2	14.318	P30837	1.1639	P15311;E7EQR4;E9PQ82;E9PNV3;P35241-3	1.0166	P00441;H7BYH4	0.88133	P00403	0.90156	P21796;C9JI87	0.97745
Q12904;Q12904-2;D6R937	1.8728	P31150;G5E9U5	1.0164	P15374;Q5TBK7	0.94784	P00491;G3V5M2;G3V308;G3V2H3;G3V393	0.98843	P00441;H7BYH4	0.9103	P21912	0.94284
Q12905	0.88382	P31153;B4DN45;Q00266	0.9388	P15531;P15531-2	1.0373	P00492;Q9NRG1-2;Q9NRG1	1.0168	P00491;G3V5M2;G3V2H3;G3V308;G3V393	1.016	P21964-2;P21964;E7EMS6;F8WBW9;E7EUU8	0.87433
Q12996	0.99648	P31350;P31350-2;C9JXC1	NaN	P15880;H0YEN5;E9PQD7;I3L404;E9PMM9;E9PM36;E9PPT0;H3BNG3;H0YE27	1.0238	P00505;E7ERW2	1.0153	P00492;Q9NRG1-2;Q9NRG1	1.0268	P22059;H0YCV6	0.99248
Q13011	NaN	P31689;B7Z5C0	1.0786	P15927;P15927-2;P15927-3;Q5TEJ7;Q5TEJ0	0.92245	P00558;B7Z7A9;E7ERH5;P07205	0.97315	P00505;E7ERW2	1.0093	P22102;P22102-2;F8WD69;C9JBJ1;C9JTV6;B4DJ93;C9JZG2;C9JKQ7;H7C366;H7C489;H7C5I9	0.97452
Q13112	NaN	P31930	1.1641	P16152;B4DFK7;E9PQ63;A8MTM1	0.99781	P00846	0.99316	P00558;B7Z7A9;E7ERH5;P07205	0.9653	P22234;E9PBS1;P22234-2;D6RF62	0.98123
Q13123	NaN	P31937;H7BZL2	0.8249	P16383-2;P16383	1.2857	P00918;E5RID5;E5RK37	1.0349	P00568;Q5T9B7;H0Y4J6;H0YID2	0.98501	P22314;Q5JRR6;Q5JRR9;Q5JRS0;Q5JRS1;Q5JRS3;Q5JRS2	0.95295
Q13151	0.92803	P31942-3;P31942-2;P31942;P31942-4;B4DHY1;P31942-6;P31942-5	0.98026	P16403	0.35865	P02545-2;Q6UYC3;P02545;P02545-3;Q5TCI8;D6RAQ3;P02545-4;H0YAB0	0.92622	P00846	1.0232	P22392-2;Q32Q12;J3KPD9;P22392;E7ERL0;E5RHP0;O60361;F6XY72;C9K028	1.0714
Q13162;H7C3T4;A6NJJ0;A6NG45	0.98394	P31946-2;P31946;Q4VY20;Q4VY19	0.99693	P16435;E7EMD0;F5H468;E7EVY7;H0Y4R2	0.9274	P02786;G3V0E5;F5H6B1;F8WBE5	1.1312	P00918;E5RID5;E5RK37	1.0241	P22626;P22626-2	1.0591
Q13177;H7C1X3;H0YCG5;E9PM17;B3KNX7;O75914-2;Q13153;Q13153-2;O75914;O75914-4;O75914-3	1.0016	P31947-2;P31947	0.97259	P16615;P16615-5;P16615-2;P16615-3;H7C5W9;P16615-4;Q93084-4;Q93084-2;Q93084-3;Q93084-7;Q93084;Q93084-6;Q93084-5;B3KY17;O14983-2;O14983;F8VSH0	0.99562	P04040	0.91977	P00966;Q5T6L7;Q5T6L5;Q5T6L6	0.57663	P22695;H3BRG4;H3BSJ9;H3BP04;H3BUE4;H3BUI9	1.026
Q13185;C9JMM0;B8ZZ43	1.0655	P31948;G3XAD8;F5H0T1;F5H783;F5GXD8;H0YGI8	0.97599	P16949;P16949-2;A2A2D0;B7Z2Z7;Q9H169;G5EA16;Q9H169-2;E5RIR6;E7EVN3	0.96234	P04075;J3KPS3;H3BQN4;H3BPS8;H3BUH7;H3BR04;H3BMQ8;H3BU78;H3BR68;Q5T7D5;P05062	0.96057	P02545-2;Q6UYC3;P02545;P02545-3;Q5TCI8;D6RAQ3;P02545-4;H0YAB0	0.9042	P22830;P22830-2;K7EPN2;K7EKP7;K7ELX4	0.87383
Q13200;E7EW34;E9PCS3;H7C1H2;H7C2Q3;C9JPC0	0.92263	P31949	1.0171	P16989;P16989-3;H0YG22	0.82373	P04080	1.0159	P02786;G3V0E5;F5H6B1;F8WBE5	1.0948	P23193;P23193-2;B7Z4S1;E5RJ93;E5RIS7;E5RK46;E5RFI1;Q5JRI7;Q15560	0.84305
Q13242;H0YIB4	0.98037	P32119;A6NIW5;P32119-2	0.98445	P16989-2;Q9Y2T7	1.2109	P04181;P04181-2	0.98529	P04040	1.0803	P23246;P23246-2;H0Y9K7;H0Y9U2	1.038
Q13247-3;Q13247;Q13247-2;Q08170	1.0759	P33176;E9PET8;O60282;J3KNA1;Q12840;O60282-2;C9JWB9	0.88869	P17066;P48741	0.94489	P04350;M0R278;M0QY85;M0R0X0;M0QY37;M0QX14;M0QZL7;M0R1I1	0.9072	P04066	1.0145	P23258;Q9NRH3;K7EKE5;K7EIS0	1.2788
Q13263;Q13263-2;M0R0K9;M0R3C0;M0R2I3	1.0016	P33993;P33993-3;P33993-2;C9J8M6	0.98973	P17096-2	0.62016	P04406;E7EUT4;E7EUT5;O14556	0.97672	P04075;J3KPS3;H3BQN4;H3BPS8;H3BUH7;H3BR04;H3BMQ8;H3BU78;H3BR68;Q5T7D5;P05062	0.97284	P23284	0.97619
Q13283;E5RIZ6;E5RI46;E5RIF8;E5RH42;Q5HYE9;E5RJU8;F5H4D6;E5RH00;D6R9X5;D6R9A4;D6RBM9;D6REX8;D6RBR0;D6RE13;D6RBW8	1.0587	P34897-3;P34897;P34897-2;B4DLV4;H0YIZ0;G3V2Y4;G3V5L0;G3V4W5;G3V540;G3V2W0;G3V241;G3V3Y8;G3V4T0;G3V4X0;G3V2E4;G3V2D2;G3V2Y1;G3V3C6	1.0299	P17174;B7Z7E9	0.84515	Q5SRN7;P04439;Q5SRN5;P13746;P13746-2;P30455;P30443;P05534;A2BDY9;P30447;P16188;P30459;P10314;B0UXQ1;A9R9N8;A2ARK8;P01893;P30512;P30457;P30456;P30453;P30450;P18462;P16190;P16189;P10316;P01892;P01891;B0UXQ0;Q5SPM3;A9R9N7;Q09160	0.88933	P04080	0.9899	P23368-2;P23368	1.505
Q13347;Q5TFK1	0.8576	P34932	1.0019	P17612-2;P17612;Q15136;K7ERP6;P22694-10;P22694-4;P22694-3;P22694;P22612;P22694-5;P22694-7;P22694-6;C9JK39;P22694-9;P22694-2	0.94871	P04632;K7EM73;K7EIV0;K7ELJ7;K7EKD8;K7ES82;K7EP80;K7EMQ1;K7EK10	0.90248	P04181;P04181-2	0.97271	P23381;P23381-2;H0YJP3;G3V277;G3V3H8;G3V3Y5;G3V423;G3V3P2;G3V227;G3V5U1;G3V456;G3V5W1;G3V3S7;G3V3X0;G3V2Y7;G3V2F2;G3V3R3;G3V4S4;G3V313;G3V339;G3V2C0;G3V4C7;G3V4N8	0.89794
Q13435;E9PPJ0;E9PJT3;H0YEX5;E9PJ04;H0YCG1;E9PIL8;H0YDT7	1.1526	P34949-2;P34949;H3BMZ9;H3BPP3;H3BUZ9;H3BPB8;H3BPU7;H3BUG1;H3BU66;H3BPM5;H3BN01;H3BQX0;H3BNY8;H3BT46;H3BP57;H3BT48;F5GX71;B4DYB8	0.96988	P17812;B7Z9C4;B4DR64	0.96154	P04818;Q8WYK4;Q8WYK3	1.0045	P04350;M0R2D3;M0R278;M0QY85;M0R0X0;M0QY37;M0QX14;M0QZL7;M0QYM7;M0R042;M0R1I1;M0R2T4;F8W813	0.94289	P23396;J3KN86;E9PL09;E9PPU1;E9PL45;F2Z2S8;H0YCJ7;H0YEU2;E9PQ96;E9PJH4;E9PK82;H0YF32;E9PSF4;E9PQX2;H0YES8;E9PJN9	1.0869
Q13442;F8WBW6	0.81449	P35232;C9JW96;C9JZ20;E7ESE2;E9PCW0;B4DY47;D6RBK0	0.92298	P17858;P17858-2	0.98076	P04843;B7Z4L4;F8WF32	1.0101	P04406;E7EUT4;E7EUT5;O14556	0.98913	P23434	0.97778
Q13541	0.87306	P35237;H0Y3G3	1.0625	P17980;E9PM69;E9PMD8;E9PKD5;E9PN50;E9PS45;E9PLG2	0.95521	P04844-2;P04844;Q5JYR4;Q5JYR7;F2Z3K5;Q5JYR3;H0Y5M1	1.0373	Q5SRN7;P13746;P04439;Q5SRN5;P13746-2;A2BDY9;P30447;P16188;P05534;P30459;P10314;P30455;P30443;B0UXQ1;A9R9N8;A2ARK8;Q29960-2;B0S7Z4;P30512;P30457;P30456;P30453;P30450;P18462;P16190;P16189;P10316;P01892;P01891;B0UXQ0;Q29960;P30508;Q5SPM3;A9R9N7;B0S7Z5;B0S7Z6;Q29940;P30685;P30498;P30495;P30493;P30492;P30491;P30490;P30484;P30464;P18465;P18464;P10319;P30510;P30504;Q9TNN7;Q07000;P30505;P30501;A2BF24;Q95…	0.92502	P23526;P23526-2	0.96426
Q13616	1.1354	P35244;B5MC59	1.5381	P17987;E7EQR6;E7ERF2;F5H282;F5H136;F5GZ03;F5H676;F5GZI8;F5H726;F5GYL4;F5H7Y1	0.9844	Q7L7L0;P04908	0.86156	P04632;K7EIV0;K7ELJ7;K7EM73;K7EKD8;K7ES82;K7EP80;K7EK10;K7EMQ1;Q96L46	0.78827	P23528;G3V1A4;E9PP50;E9PK25;E9PQB7;E9PLJ3;E9PS23	1.01
Q13642-1;Q13642-5;Q13642-4;Q5JXI8;Q5JXI0;Q5JXH9;Q13642-3;Q5JXH8;Q5JXH7;Q5JXI3;Q5JXI2;Q13642	1.0119	P35251-2;P35251;H0Y8U4	0.72073	P18077;C9K025;F8WBS5;F8WB72	1.1396	P05091;F8W0A9;E7EUE5;F8VXI5;F8VP50;H0Y2X5;P00352;P47895	0.99575	P04792;F8WE04;C9J3N8	0.90995	P23921;F5H861;E9PL69;E9PD78	0.84897
Q9BVA1;Q13885	1.1089	P35268;K7ELC4;K7EMH1;K7ERI7;K7EP65;K7EKS7;K7EJT5;C9JYQ9;Q6P5R6;H0Y8C2	0.98075	P18085;C9JPM4;C9JAK5	0.96934	P05114;F2Z2W6;F2Z2Y5;H7BXJ5;A6NEL0;A6NL93	0.76994	P04818;Q8WYK4;Q8WYK3	0.66389	P24534;F2Z2G2;C9JZW3;F8WF65	1.0111
Q14008-2;Q14008;Q14008-3;E9PQH5	0.90382	P35270	1.0491	P18206-2;P18206;Q5JQ13;P18206-3;B4DTM7	0.98461	P05141;Q9H0C2	1.1976	P04843;B7Z4L4;F8WF32	1.0234	Q5QNZ2;P24539	1.0723
Q14103-3;Q14103;D6RAF8;H0Y8G5;H0YA96;Q14103-4;B4DTC3;Q14103-2;D6RF44;D6RBQ9;D6RD83;F5H6R6	1.0671	P35520;P35520-2;F5H2U1;C9JMA6;H7C2H4	1.3042	P18583-6;P18583-2;P18583-10;P18583-3;P18583-4;P18583-7;P18583;P18583-5;P18583-9;P18583-8;H7C1M2	1.0611	P05198;H0YJS4;G3V4T5	0.99343	P04844-2;P04844;Q5JYR4;Q5JYR7;F2Z3K5;H0Y5M1	1.0145	P24752;H0YEL7;G3XAB4;E9PRQ6;E9PKF3	0.9348
Q14166	1.141	P35573;P35573-2;P35573-3	0.84707	P18669;P15259;Q8N0Y7	0.9954	P05204;Q15651-2;Q15651	0.72954	P05114;F2Z2W6;F2Z2Y5;H7BXJ5;A6NEL0;A6NL93	0.7336	Q6NX41;P24928	0.73659
Q14204;H0YJ21	0.98021	P35579;P35579-2;Q5BKV1;B1AH99	1.0558	P18754;P18754-2;C9JW69;H7C497;C9JRH2;C9JMJ4;C9J3R0;C9JQZ4	1.0403	P05386	0.90619	P05141	1.1339	P25205;B4DWW4;J3KQ69;Q7Z6P5	0.98797
Q14247-3;Q14247;Q14247-2;B4E358;E9PKG3;E9PP90;H0YEV2;H7C314;H0YCD9	1.1216	P35659;D6RDA2;P35659-2;B4DFG0;D6R9L5;H0Y8X0;H0Y993	0.94544	P18859;P18859-2;A8MUH2	0.9412	P05387	1.0536	P05198;H0YJS4;G3V4T5	1.0028	P25398	1.0518
Q14258	0.65826	P35998;B7Z5E2;C9JLS9	0.86472	P18887;M0R0D2;M0QYS5;F5H8D7;M0QZ96;M0R1U8	0.87258	P05388;Q3B7A4;F8VWS0;F8VU65;F8VW21;F8VPE8;G3V210;F8VQY6;F8VRK7;F8VZS0;Q8NHW5;F8VWV4;F8VS58;F8W1K8	1.0069	P05204;Q15651-2;Q15651	0.70461	P25705;P25705-2;K7ENP3;K7EK63;K7EK77;K7ENJ4;K7ERX7;K7EQT2;K7EJP1;K7EKV9;K7ESA0	1.0043
Q14315-2;Q14315	1.0618	P36405	0.93608	P19338;H7BY16;C9JYW2;C9JLB1;C9J1H7;C9JWL1	0.98516	P05556-2;P05556;P05556-5;P05556-4;P05556-3;C9JPK5;E7ERX5;Q5T3E6;E9PLR6;E7EUI6;E7EQW5	1.0479	P05386	0.90259	P25786;P25786-2;F5GX11;B4DEV8	0.88967
Q14566	0.92467	P36551;H0YA22	0.81724	P19387;H3BRR2	0.86006	P05783;F8VZY9;CON__P05784;C9JM50;P08727;CON__P08727;CON__P19001;K7EMD9;K7EPJ9;CON__H-INV:HIT000015463;P13646-2;Q14525;CON__Q14525;K7ERE3;Q15323;CON__Q9UE12;CON__Q15323;CON__A2A5Y0;O76013-2;P13646-3;CON__ENSEMBL:ENSP00000377550;CON__Q92764;C4AM86;Q04695;CON__Q04695;CON__Q9QWL7;CON__P08730-1;Q14532;CON__Q14532;O76014;CON__Q6IFX2;CON__A2AB72;Q92764;CON__Q497I4;P19012;O76015;CON__P19012;CON__O76015;C…	0.94296	P05387;H0YDD8	1.0457	P25787;C9JCK5;Q6MZI6;H7C402;H3BT36	0.90611
Q14677-2;Q14677;Q14677-3;H0YD52	1.2243	P36578;H3BM89;H3BTP7;H3BU31	1.1332	P19388	0.89638	P06132;H0Y5R6;Q5T446	0.89588	P05388;Q3B7A4;F8VWS0;F8VU65;F8VPE8;G3V210;F8VW21;F8VQY6;F8VRK7;F8VWV4;F8VZS0;Q8NHW5;F8VS58;F8W1K8	1.0001	P25788-2;P25788;G3V4X5	0.8928
Q14683;G8JLG1;H0Y7K8	1.0637	P36871;P36871-3;P36871-2	1.0427	P19525-2;P19525	0.99328	P06280	1.0441	P05556-2;P05556;P05556-5;P05556-4;P05556-3	1.0833	P26038	0.87321
Q14692	1.7293	P36957;B7Z5W8;Q86SW4;H0YJF9;G3V5M3;G3V3F0	0.89877	P19623;K7EL89;K7EKM4;K7EQ47	1.0422	P06493;P06493-2;E5RIU6;K7ELV5;E7ESI2;P24941-2;P24941;Q00526;G3V5T9;G3V317	0.97114	P05783;F8VZY9;CON__P05784;C9JM50;P08727;CON__P08727;CON__P19001;K7EMD9;K7EPJ9;P13646-2;Q14525;CON__Q14525;K7ERE3;Q15323;CON__Q9UE12;CON__Q15323;CON__A2A5Y0;O76013-2;P13646-3;CON__ENSEMBL:ENSP00000377550;CON__Q92764;C4AM86;Q04695;CON__Q04695;CON__Q9QWL7;CON__P08730-1;Q14532;CON__Q14532;O76014;CON__Q6IFX2;CON__A2AB72;Q92764;CON__Q497I4;P19012;O76015;CON__P19012;CON__O76015;CON__A2A4G1;P13646;Q7Z3Y7…	0.9311	P26196	0.89578
Q14697;Q14697-2;F5H6X6;E9PKU7;E9PNH1;H0YFL4;E9PRF8	0.99725	P37108;H0YLA2	0.97441	P20042	0.95803	P06576;F8VPV9;H0YH81;F8W079;F8W0P7;H0YI37;F8VQY0	0.99333	P05976-2;P05976;P08590	0.96938	P26368-2;P26368;K7ENG2;K7ELP8	0.98604
Q14739;C9JXK0	0.9304	P37198;M0QXN5	0.6338	P20290-2;P20290;D6RDG3;H0Y9Y1	1.0353	P06733;P06733-2;K7EM90;K7EQF3;K7EN23;P13929-3;B7Z2X9;P13929-2;P13929;P09104;E5RI09;E5RG95;K7EPM1;K7EKN2;E5RGZ4;F5H0C8;F5H1C3;F5H5U1;F5GWQ3;F5GZ30	1.01	P06132;H0Y5R6;Q5T446	0.89185	P26373;J3QSB4;P26373-2;H3BTH3;H3BUK8;J3KS98	0.98551
Q14789;Q14789-2;C9JGI8;C9J4Q3;B8ZZG1;REV__Q8N884-2;REV__Q8N884;Q9NZW5;E7EU81	0.63824	P37802;C9J5W6;Q9UI15	1.0823	P20618	0.89602	P06737-2;P06737;E9PK47;E9PMM6;P11217-2;P11217;H0Y4Z6	1.01	P06280	0.82886	P26583;D6R9A6	0.86825
Q14974;B7ZAV6;F5H4R7;J3KTM9;J3QR48;J3QKQ5;J3QRG4	0.94962	P37837;F2Z393	0.96917	P20674;H3BRM5;H3BV69;H3BNX8;H3BRI0	0.97024	P06744;P06744-2;K7EP41;K7ELR7;K7ERC6;K7ENR8;K7ERK8;K7EIL4;K7ESF4	0.97948	P06493;P06493-2;E5RIU6;K7ELV5;Q00526;G3V317	0.94338	P26599;P26599-2;P26599-3;A6NLN1;K7ES59;K7ELW5;K7EKJ7;K7EK45	0.95923
Q14978;Q14978-2;Q14978-3	0.78071	P38117;P38117-2;M0QY67	0.95346	P20700;E9PBF6	1.038	P06748;P06748-3;P06748-2;E5RI98;E5RGW4	1.0244	P06576;F8VPV9;H0YH81;F8W079;F8W0P7;H0YI37;F8VQY0	0.99511	P26639;P26639-2;E7ERI3;G3XAN9;D6R9F8;D6RCA5;D6RDJ6;A2RTX5-2;B7ZLP8;A2RTX5;D6RBR8;D6RJ97;D6RHV7;D6RCS6	0.89883
Q14980-4;Q14980-3;Q14980-2;Q14980;K4DIE0;H0YFY6;Q9BTE9	1.577	P38159;H3BT71;P38159-2;H0Y6E7;Q96E39;B3KRG5;H3BUY5;H3BR27;P38159-3;H3BNC1;O75526;Q8N7X1	1.0022	P20962	1.0293	P06753-2;P06753-3;Q5VU58;Q5VU59;Q5VU61;Q5VU66;Q5VU72;J3KN67;D6R904;P06753;K7EP68;Q5VU63;K7ERG3;D6RFM2;A6NL28-2;A6NL28	0.97074	P06733;P06733-2;K7EM90;K7EQF3;K7EN23;P13929-3;B7Z2X9;P13929-2;P13929;P09104;E5RI09;E5RG95;K7EPM1;K7EKN2;E5RGZ4;F5H0C8;F5H1C3;F5H5U1;F5GWQ3;F5GZ30	1.0255	P26641;B4DTG2;E7EMT2	1.0449
Q14CX7-2;Q14CX7	0.91126	P38646;D6RJI2;D6RA73;H0YBG6;H0Y8S0	1.0064	P21266	1.1497	Q16778;P33778;P23527;P06899;Q8N257;Q6DRA6;Q6DN03	0.9341	P06737-2;P06737;E9PK47;E9PMM6;P11217-2;P11217;H0Y4Z6	0.97057	P27144;D3DQ64	1.0644
Q15029-2;Q15029;K7EJ81;K7EP67;K7EJ74	0.86289	P38919;I3L3F6;I3L2Z3;I3L3H2;I3L2M0;J3QQP0;E9PBH4;F8WE11	1.1088	P21281;H0YC04;C9J5E3;C9JNS9;C9JL73;P15313	1.1443	P07099	0.83782	P06744;P06744-2;K7EP41;K7ELR7;K7ERC6;K7ENR8;K7ERK8;K7EIL4;K7ESF4;Q8N196	0.97228	P27348;E9PG15	1.0151
Q15046;Q15046-2;J3KRL2;H3BPV7;H3BVA8	1.0296	P39019;M0R2L9;M0QXK4;M0QYF7;M0R140	0.94387	P21333-2;P21333;Q5HY54;E9PHF0;F8WE98;H0Y5C6;H0Y5F3	0.87703	P07108;P07108-3;P07108-2;P07108-4;P07108-5	0.94609	P06748;P06748-2;P06748-3;E5RI98;E5RGW4	1.0131	P27635;F8W7C6;H7C123;H7C2C5;B8A6G2;A6QRI9;Q96L21;H7C2U2	1.0792
Q15050	0.85678	P39023;G5E9G0;H7C422;B5MCW2;H7C3M2;F8WCR1;Q92901	1.044	Q9HBB2;P21399	1.1102	P07195;A8MW50;C9J7H8;F5H793	1.0229	P06753-2;P06753-3;Q5VU58;Q5VU59;Q5VU61;Q5VU66;Q5VU72;D6R904;K7EP68;Q5VU63;K7ERG3;H0YL80;H0YKX5;H0YKP3;H0YNC7;P09493-2;P09493-5;F5H7S3;H7BYY1;H0YK48;H0YL52;B7Z596;P09493-7;P09493-6;P09493-4;P09493-3;P09493;D9YZV8;D9YZV3;D9YZV2;Q6ZN40;D6RFM2;A6NL28-2;A6NL28	0.97964	P27694;I3L4R8;I3L524;I3L2M5	0.89704
Q15056-2;Q15056	0.85846	P39687;H0YN26;O95626;O43423	1.0338	P21796;C9JI87	1.008	P07196	0.77826	Q16778;P33778;P23527;P06899;Q6DRA6;Q6DN03	0.95797	P27695;G3V3M6;G3V5Q1;G3V3C7;G3V5D9;G3V5M0;G3V359;H7C4A8;G3V3Y6;G3V574	0.92335
Q15102;M0R389;M0R1K3	0.94683	P39748;I3L3E9;F5H1Y3	0.98062	P21817-3;P21817-2;P21817	0.17375	P07237;H7BZ94;I3L2P8;F5H8J2;I3L398;H0Y3Z3;I3L312;I3L4M2;I3NI03;I3L0S0;I3L3U6;I3L3P5;I3L1Y5;I3L514	0.97235	P07099	1.0004	P27797;K7EJB9;K7EL50;K7EM77	0.92383
Q15125;C9J719;C9JJ78	1.0144	P40222	0.84603	P21912	1.1078	P07305;P07305-2	0.52527	P07108;P07108-3;P07108-2;P07108-4;P07108-5;P07108-6	0.99633	P28066;P28066-2	0.88447
Q15126	0.78234	P40227;B4DPJ8;P40227-2;B4DX20;Q92526;Q92526-2	0.99114	P21964-2;P21964;E7EMS6;F8WBW9;E7EUU8	0.99826	P07339;H7C469;F8WD96;C9JH19;F8W787;H7C1V0	0.98629	P07195;A8MW50;C9J7H8;F5H793	1.0288	P28070	0.99019
Q15149-7;Q15149-8;Q15149-9;Q15149-5;Q15149-4;Q15149-6;Q15149-3;Q15149-2;Q15149	NaN	P40429;M0QYS1;Q6NVV1;M0QZU1	1.2949	P22087;M0R299;M0QXL5;M0R0P1;M0R2Q4;M0R2U2;M0R1H0;M0R2B0;A6NHQ2	0.95034	P07355;H0YN42;P07355-2;H0YMD0;H0YMU9;A6NMY6;H0YKS4;H0YM50;H0YMM1;H0YNP5;H0YN28;H0YL33;H0YKZ7;H0YLV6;H0YMT9;H0YKX9;H0YKL9;H0YMW4;H0YNA0;H0YKV8;H0YMD9;H0YN52;H0YNB8;H0YKN4;H0YLE2	0.97349	P07199	NaN	P28072;I3L3X7	1.0921
Q15181;Q5SQT6	1.0118	P40925-2;P40925;P40925-3;B9A041;B8ZZ51;C9JF79;C9JRL4	0.98212	P22102;P22102-2;F8WD69;C9JBJ1;C9JTV6;B4DJ93;C9JZG2;C9JKQ7;H7C366;H7C489	0.97252	P07384;E9PRM1;E9PIA9;E9PLX0;E9PJJ3;E9PLC9;E9PMC6;E9PJA6;E9PSA6;E9PLQ6;E9PL37;E9PQB3	0.89248	P07237;I3L2P8;F5H8J2;H7BZ94;I3L398;I3L312;H0Y3Z3;I3L4M2;I3NI03;I3L0S0;I3L3U6;I3L3P5;I3L1Y5;I3L514	0.92713	P28074;P28074-3;H0YJM8;P28074-2	0.98614
Q15233;Q15233-2;C9JYS8;H7C367;C9IZL7;C9J4X2	0.99926	P40926;E9PDB2;G3XAL0	0.91331	P22234;E9PBS1;P22234-2;D6RF62	1.0107	Q5JP53;P07437;Q5ST81;E9PBJ4;G3V2A3;G3V5W4;G3V2R8;G3V3R4;G3V2N6	0.99821	P07305;P07305-2	0.47896	P28161;E9PHN7;P28161-2;E9PHN6;F6XZQ7;E9PLF1;E9PGV1;Q5T8Q9;P46439;Q5T8R1	0.80653
Q15293;E9PNT6;E9PJD5;B7Z1M1	1.1761	P40938-2;P40938	0.73673	P22314;Q5JRR6;Q5JRR9;Q5JRS0;Q5JRS1;Q5JRS3;Q5JRS2	0.96148	P07737;K7EJ44;CON__P02584;I3L3D5	1.0075	P07339;H7C469;F8WD96;C9JH19;F8W787;H7C1V0	0.95913	P28838-2;P28838;H0Y9Q1;H0Y983	0.9081
Q15365	0.94619	P40939;B4DYP2;H0YFD6	1.1726	P22392-2;Q32Q12;P22392;J3KPD9;E7ERL0;O60361;F6XY72;E5RHP0;C9K028	1.017	P07741;P07741-2;H3BQZ9;H3BQB1;H3BQF1;H3BSW3	0.94985	P07355;P07355-2;H0YN42;H0YMD0;H0YMU9;A6NMY6;H0YKS4;H0YM50;H0YMM1;H0YNP5;H0YN28;H0YL33;H0YKZ7;H0YLV6;H0YMT9;H0YKX9;H0YKL9;H0YMW4;H0YNA0;H0YKV8;H0YMD9;H0YN52;H0YNB8;H0YKN4;H0YLE2	1.0043	P29144;Q5VZU9	1.0694
Q15366-3;Q15366-2;F8VZX2;Q15366-4;Q15366-5;Q15366-6;Q15366;B4DLC0;H3BRU6;G3V0E8;B4DXP5;F8W0G4;F8VXH9;F8W1G6;F8VRG9;F8VWQ4;J3QT27;P57721-2;P57721-3;P57721-5;E9PFP8;P57721-4;P57721;F8VTZ0;H3BND9;H3BSS4;F8VRH0;H3BSP4;C9K0A2;F8WC71;C9IZV9;C9J7A9;C9JSA6;C9J5V4;C9JTY5;C9JZY3;C9J0A4;P57723-2;P57723	0.989	P41091;Q2VIR3;Q2VIR3-2;F8W810;H7BZU1	0.89805	P22626;P22626-2	1.045	P07814	0.94458	P07384;E9PIA9;E9PLX0;E9PJJ3;E9PLC9;E9PMC6;E9PJA6;E9PSA6;E9PLQ6;E9PQB3;E9PRM1	0.88479	P29373;Q5SYZ4	0.84967
Q15393;Q15393-2;Q15393-3;H3BMB0;J3QRB2;J3QL37;I3L4G7;J3QKV4	1.0814	P41227-2;P41227;C9JN83;C9JW55;F8W808;A8MWP7	0.88011	P22695;H3BRG4;H3BSJ9;H3BP04;H3BUE4;H3BUI9	1.0597	P07858	1.0423	Q5JP53;P07437;Q5ST81;E9PBJ4;I3L2F9;A6NNZ2;A6NKZ8;Q9H4B7;CON__ENSEMBL:ENSBTAP00000025008	1.0525	P29401;P29401-2;B4E022;E9PFF2;F8W888;F8WAX4	1.0045
Q15459;E9PAW1	1.0761	P41240;H3BUM9;H3BU69;K7ENL8;K7ES68;P42679-3;K7EQY5;P42679;P42679-2	0.94885	P22830;P22830-2;K7ELX4;K7EPN2;K7EKP7	0.95546	P07900;P07900-2;Q86U12;G3V2J8;Q58FG0;Q14568;Q58FG1	0.95632	Q5URX0;P07686;D6REQ8;H0Y9B6	NaN	P29966	0.93021
Q15645	0.57459	P41250	0.98898	P23193;P23193-2;E5RIS7;E5RJ93;B7Z4S1;E5RK46;E5RFI1;Q5JRI7;Q15560	0.98867	P07910;G3V576;G3V555;G3V575	0.85463	P07737;K7EJ44;CON__P02584;I3L3D5	1.0278	P30040;F8VY02;P30040-2	0.93707
Q15691	1.0379	P41743	NaN	P23246;P23246-2;H0Y9K7;H0Y9U2	1.0293	P07919	1.009	P07741;P07741-2;H3BQF1;H3BQZ9;H3BQB1;H3BSW3	0.91221	P30041	0.92835
Q15751	0.36767	P42025;G5E9Q5	1.2736	P23258;Q9NRH3;K7EKE5;K7EIS0	1.1708	P07954-2;P07954	0.9959	P07814	0.94805	P30044-2;P30044;P30044-3;A6NC19	0.9178
Q15758;M0QXM4;B4DWS4;Q15758-2;M0QX44	1.0411	P42166;A2T926	1.0042	P23284	0.97497	P08107;P08107-2;E7EP94;Q5SP16	0.96278	P07858	1.166	P30046;B7Z522;A6NHG4;B5MC82;J3KQ18;H7C342	0.9421
Q15785	1.1824	P42677;Q5T4L4;C9J1C5	1.0459	P23381;P23381-2;G3V277;G3V3H8;G3V3Y5;G3V423;G3V5U1;G3V456;H0YJP3;G3V3P2;G3V227;G3V2Y7;G3V3X0;G3V2F2;G3V3R3;G3V4S4;G3V313;G3V339;G3V2C0;G3V4C7;G3V4N8;G3V5W1;G3V3S7	0.87529	P08237;P08237-3;P08237-2;F8VSL1;F8VX13;F8VNX2;F8VZQ1;F8VP00	1.0006	P07900;P07900-2;Q86U12;G3V2J8;Q58FG0;Q14568;Q58FG1	0.96162	P30049	1.1245
Q15836	0.94525	P42704;B8ZZ38;C9JCA9;H7C3W8	1.0349	P23396;J3KN86;E9PL09;E9PPU1;E9PL45;F2Z2S8;H0YCJ7;H0YEU2;E9PQ96;E9PJH4;E9PK82;H0YF32;E9PSF4;E9PQX2;H0YES8;E9PJN9	1.0792	P08238;Q58FF7;Q5T9W8;H0Y6E4;H0Y5S7;H0Y598;Q58FF6	0.96911	P07910	0.94881	P30050;P30050-2	0.97146
Q15843;E9PS38;F8VSA6;E9PL57	1.003	P42766;H0Y3A0;F2Z388	0.94672	P23434	1.0523	P08240-2;P08240	1.1528	P07919	0.9766	P30084	1.013
Q16186	1.0495	P43034;I3L2U8;B4DF38;I3L3N5;P43034-2;I3L495	1.0656	P23526;P23526-2	0.96544	P08243-2;P08243;P08243-3;F8WEJ5;C9J057;C9JT45;C9JLN6;C9JM09	0.86096	P07954-2;P07954	0.91198	P30085;Q5T0D2;E9PGI8	0.9643
Q16222-2;Q16222-3;Q16222;B1AR80	0.96294	P43246;P43246-2;E9PHA6;C9J809	0.89125	P23528;G3V1A4;E9PP50;E9PK25;E9PQB7;E9PLJ3;E9PS23	1.0302	P08559-3;P08559;P08559-4;P08559-2;Q5JPU3;Q5JPU0;Q5JPU1;Q5JPT9;P29803	1.0201	P08107;P08107-2;E7EP94;Q5SP16	0.97934	P30086	0.91623
Q16531;F5GY55;F5H775;F5H6C5;F5H238;F5H581;B4DG00;F5H2L3;F5GYG8;F5GWI0;F5GZY8;F5H198;F8WF81;F5GZ34;F5H0Y5;F5H4N9	1.1186	P43487;C9JXG8;C9JJ34;C9JGV6;H7C137;C9JDM3;C9JIC6;B3KUP2	0.94858	P23786	1.11	P08574	1.3035	P08133;P08133-2;A6NN80;E5RK69;E7EMC6;E5RFF0;E5RJF5;E5RK63;E5RJR0;E5RI05;H0YC77;E5RIU8	1.0234	P30153;F5H3X9;B3KQV6;C9J9C1;E9PH38;P30154-4;P30154;P30154-2;A8MY67;P30154-3;H0YDG7;J3KR29;E9PPI5;E9PNM7;E9PHZ6	0.95323
Q16878	1.0325	Q5SYT8;P43490;F5H246	1.0038	P23921;E9PD78;F5H861;E9PL69	1.0937	P08621-2;P08621;P08621-3;M0QYR1;M0QX04;P08621-4	0.98343	P08237;P08237-3;P08237-2;F8VP00	1.1045	P30405;Q2YDB7;H0Y548	0.87654
Q19AV6	1.889	P43686;P43686-2	0.97349	P24534;F2Z2G2;C9JZW3;F8WF65	1.021	P08670;B0YJC4;B0YJC5;Q5JVS8;P17661;H7C5W5;P41219;P41219-2;Q16352;P07197-2;E7EMV2;E7ESP9;P07197;P12036-2;P12036	0.89837	P08238;Q58FF7;Q5T9W8;H0Y6E4;H0Y5S7;H0Y598	0.97115	P30419-2;P30419;K7EN82;B7Z8J4;B4DXS1;Q5VUC6;F5H594;O60551;Q5VUC7	0.82097
Q2NL82	1.8447	P45880;P45880-2;P45880-1;B4DKM5;Q5JSD2;Q5JSD1;A2A3S1	1.077	Q5QNZ2;P24539	0.97463	P0CW22;P08708;H0YN88;H0YK46;H0YN73	1.0189	P08240-2;P08240	0.91237	P30520	0.91046
Q2TAY7;B4E3L0	1.1357	P45974-2;P45974;H7C5J3;Q92995-2;Q92995	0.93553	P24666;G5E9R5;B5MCC7;F2Z2Q9;P24666-3;P24666-2;D3YTI2	1.0287	P08754;P63096-2;P63096	0.90994	P08243-2;P08243;P08243-3;F8WEJ5;C9J057;C9JT45;C9JLN6;C9JM09	0.85398	P30533;D6REW6	1.0078
Q52LJ0;Q52LJ0-2	1.1581	P46013-2;P46013	1.2352	P24752;H0YEL7;G3XAB4;E9PKF3;E9PRQ6	0.91131	P08758;D6RBL5;E7ENQ5;D6RBE9;E9PHT9;D6RCN3	0.96628	P08559-3;P08559;P08559-4;P08559-2;Q5JPU3;Q5JPU0;Q5JPU1;Q5JPT9;P29803	1.0495	P30550	0.8923
Q53GQ0;E9PI21	0.95196	P46060;F8W7I9;H0Y4Q3;B0QYT6;B0QYT5;B0QYT4	1.007	Q6NX41;P24928	0.58373	P09012;M0R268;M0R221;M0R2B8;M0QZG7;M0R0G9;M0QXK2	0.89714	P08574	1.0737	P30837	0.78596
Q562R1	0.84352	P46063;F5H2L2;F8WA66;F8WD97;F5H4P4;F5H3W0	1.0779	P25205;B4DWW4;J3KQ69;Q7Z6P5	1.06	P09132	0.858	P08621;P08621-2;P08621-3;M0QYR1;M0QX04;P08621-4	0.90634	P31150;G5E9U5	0.8248
Q58FF8	1.2189	P46087-2;P46087;P46087-4;P46087-3;F5H5X6;F5GYR3;F5H359;F5H8G6;F5GWB7;F5H709	0.87854	P25398	1.0478	P09211;A8MX94	0.90502	P08670;B0YJC4;B0YJC5;Q5JVS8;P17661;H7C5W5;P41219;P41219-2;Q16352;P07197-2;E7EMV2;E7ESP9;P07197;P12036-2;P12036	0.89509	P31153;B4DN45;Q00266	0.87148
Q5BKZ1-3;Q5BKZ1	1.237	P46109	0.68525	P25705-2;P25705;K7EK63;K7ENP3;K7EK77;K7EQT2;K7ERX7;K7EJP1;K7ENJ4;K7EKV9;K7ESA0	1.0011	P09234	1.0458	P0CW22;P08708;H0YN88;H0YK46;H0YN73	1.0019	P31350;P31350-2;C9JXC1	0.82877
Q5JQQ4;Q9BVM2	NaN	P46777;Q5T7N0	1.1437	P25786;P25786-2;F5GX11;B4DEV8	0.95175	P09417;B3KW71;H0Y8F7;B7Z415;D6RGG7	1.0229	P08754	0.97251	P31689;B7Z5C0	0.96734
Q5LJB0;Q9Y5K5-2;Q9Y5K5-4;Q9Y5K5-3;Q9Y5K5;Q5LJA5;Q5LJA9	1.2502	P46778;G3V1B3;M0R181	0.98192	P25787;C9JCK5;Q6MZI6;H7C402;H3BT36	0.95879	P09429;Q5T7C4;Q5T7C6;Q5T7C0;B2RPK0;P23497	0.96035	P08758;D6RBL5;E7ENQ5;D6RBE9;E9PHT9;D6RCN3	0.99094	P31930	1.0126
Q5QPL9;Q9UKM9-2;Q9UKM9;Q5QPM0;Q5QPM1;Q5QPM2	1.1219	P46781;B5MCT8;C9JM19;F2Z3C0;A8MXK4	1.6405	P25788-2;P25788;G3V4X5	0.98084	P09496-2;P09496-4;P09496-3;P09496;F8WF69;F5H6N3	0.91996	P09012;M0R268;M0R221;M0R2B8;M0QZG7;M0R0G9;M0QXK2	0.82669	P31937;H7BZL2	1.2318
Q5SQT3;Q9P0M6	12.142	P46783;F6U211;Q9NQ39	0.89689	P26038	0.97974	P09497-2;P09497	0.9734	P09132	0.82263	P31939;E9PBU3;F5GWY2;H7C1S2;H7C084;C9JLK0;F8WEF0;H7BZU3	0.96985
Q8NCW5-2;Q5T3I4;Q5T3I3;Q8NCW5	0.87462	P46940;H0YLE8	0.9723	P26196	0.9212	P09543-2;P09543;B4DFN6	0.90063	P09211;A8MX94	0.93624	P31942-3;P31942-2;P31942;P31942-4;B4DHY1;P31942-6;P31942-5	0.90808
Q9UBQ7;Q5T946	1.2419	P47813;O14602;A6NJH9	0.95855	P26368-2;P26368;K7ENG2;K7ELP8	0.96562	P09622;B4DT69;E9PEX6;B4DHG0;F8WDM5;F2Z2E3	0.99796	P09234	1.0759	P31946;Q4VY20;Q4VY19	1.218
Q5TB20;Q9BTT0;H0YCE2;E9PPH5;Q5TB25;Q5TB19;Q9BTT0-2	0.96309	P47914	0.83875	P26373;P26373-2;J3QSB4;H3BTH3;J3KS98;H3BUK8	0.98746	P09661;H0YKK0;H0YMA0;H0YLR3	0.93156	P09417;B3KW71;H0Y8F7;B7Z415;D6RGG7	0.98895	P31946-2	0.90993
Q5TBE3-2;Q5TBE3	0.17515	P47985;P0C7P4	1.9057	P26583;D6R9A6	0.90525	P09669	0.94308	P09429;Q5T7C4;Q5T7C6;Q5T7C0;B2RPK0;P0C6E5;P23497	0.96815	P31947-2;P31947	1.023
Q5TCU6;Q9Y490	1.114	P48047;H7C0C1;H7C086;H7C068	0.99526	P26599;P26599-2;P26599-3;A6NLN1;K7EK45;K7ES59;K7ELW5;K7EKJ7	0.96344	P09874;Q5VX84;Q5VX85	0.97041	P09496-2;P09496-4;P09496-3;P09496;F5H6N3;C9J8P9;F8WF69	0.92961	P31948;G3XAD8;F5H0T1;F5H783;F5GXD8;H0YGI8	0.96425
Q5TH69	0.22688	P48147	0.86797	P26639;P26639-2;E7ERI3;G3XAN9;D6R9F8;D6RCA5;D6RDJ6;A2RTX5-2;B7ZLP8;A2RTX5;D6RBR8;D6RJ97;D6RHV7;D6RCS6	0.98676	P09936;D6RE83;D6R956;D6R974;D6RF53	0.85982	P09543-2;P09543;B4DFN6;K7ERC4	0.88937	P31949	1.0026
Q5VT94;Q9H3K2	NaN	P48507	0.86633	P26641;B4DTG2;E7EMT2	1.0085	P09960;P09960-4;P09960-2;P09960-3;B4DEH5	0.94094	P09622;B4DT69;E9PEX6;B4DHG0;F8WDM5;F2Z2E3	0.96776	P32119;A6NIW5;P32119-2	0.94658
Q6GMV3	0.80823	P48637;B7Z514;B6F210	1.0709	P27144;D3DQ64	1.103	P09972;K7EKH5;C9J8F3;J3KSV6;J3QKP5;A8MVZ9	0.95352	P09661;H0YKK0;H0YMA0;H0YLR3	0.9073	P32969;D6RAN4;H0Y9V9;E7ESE0;H0Y9R4	1.1161
Q9Y3B3-2;Q9Y3B3;Q6JUT2	1.927	P48643;E7ENZ3;B7ZAR1;E9PCA1;B4DYD8;D6RIZ7;H0Y914	1.0036	P27348;E9PG15	1.0165	Q71UI9;P0C0S5;Q71UI9-3;Q71UI9-4;Q71UI9-2;C9J0D1;C9J386	0.8179	P09669	1.0046	P33176;E9PET8;J3KNA1;O60282;Q12840;O60282-2;C9JWB9	0.97855
Q6P2Q9;I3L0J9	0.97395	P48729;P48729-2;H0Y9X2;D6REM4;E7ETM0;Q71TU5;Q8N752	0.95596	P27635;F8W7C6;H7C123;H7C2C5;B8A6G2;A6QRI9;Q96L21;H7C2U2	1.0386	P10155;P10155-3;Q5LJA0;P10155-4;P10155-2;H0Y9N5;D6RDN1;D6RE09;G5E9R9	0.98595	P09874;Q5VX84;Q5VX85	0.97258	P33993;P33993-3;P33993-2;C9J8M6	0.96723
Q6PI48	1.1007	P49006	0.8734	P27694;I3L4R8;I3L524;I3L2M5	0.89856	P10412;P16402;P22492;P16401	0.43885	P09936;D6RE83;D6R956;D6R974;D6RF53	0.84567	P34897-3;P34897;P34897-2;B4DLV4;H0YIZ0;G3V2Y4;G3V5L0;G3V4W5;G3V540;G3V2W0;G3V241;G3V3Y8;G3V4T0;G3V4X0;G3V2E4;G3V2D2;G3V2Y1;G3V3C6;B4DPM9	0.97847
Q6PKG0-3;Q6PKG0;H0YC73;Q659C4-7;Q659C4-6;H0YBW1;Q659C4-5;E5RH50;Q659C4-9;Q659C4-2;Q659C4	1.1904	P49189;B4DXY7	0.94992	P27695;G3V3M6;G3V5Q1;G3V3C7;G3V5D9;G3V5M0;G3V359;H7C4A8;G3V3Y6;G3V574	0.97408	P10599;P10599-2	1.0287	P09960;P09960-4;P09960-2;P09960-3;B4DEH5	0.95671	P34932	0.96038
Q6UXN9	1.0353	P49207	0.90992	P27797;K7EJB9;K7EL50	0.9475	P10606	1.4662	P09972;K7EKH5;C9J8F3;J3KSV6;J3QKP5;A8MVZ9	0.93461	P34949;H3BMZ9;H3BPP3;H3BUZ9;P34949-2;F5GX71;H3BPB8;H3BN01;H3BNY8;H3BP57;H3BT48;H3BPU7;H3BUG1;H3BU66;H3BPM5;H3BQX0;H3BT46;B4DYB8	1.0806
Q6Y1H2	0.8916	P49257	0.97805	P28066;P28066-2	0.95415	P10619	1.2416	Q71UI9;P0C0S5;Q71UI9-3;Q71UI9-4;Q71UI9-2;C9J0D1;C9J386	0.80243	P35232;C9JW96;C9JZ20;E7ESE2;E9PCW0;B4DY47;D6RBK0	0.97883
Q7KZF4;H7C597	1.0251	P49321;P49321-3;P49321-2;Q5T624;F5H3J2;H0YDS9;E9PRH9;H0YF33;E9PI86;E9PPQ8;E9PPR5	1.031	P28070	1.0393	P10644;K7EPB2;K7ER48;K7EM13;K7EPR5;K7EQK3;K7EMU2;K7EMZ6;K7EIE5;K7EID3;K7ENR3;K7EJ40;K7EK41	1.0398	Q99878;Q96KK5;Q9BTM1;Q16777;Q6FI13;P0C0S8;P20671;Q9BTM1-2;H0YFX9;A8MQC5;REV__H0Y672;REV__E7EQ67;REV__H7BY63;REV__Q8NB25-4;REV__Q8NB25-2;REV__Q8NB25-3;REV__Q8NB25	0.84465	P35237;H0Y3G3	1.0502
Q7L2H7;H0YCQ8;B4E2Q4;J3KNJ2;E9PRY0;E9PN86	1.1362	P49327;J3KTF0	0.99511	P28072;I3L3X7	0.95617	P10768;H7BZT7	1.0069	P10155-3;Q5LJA0;P10155-4;P10155;P10155-2;H0Y9N5;D6RDN1;D6RE09	0.92017	P35244;B5MC59	2.0352
Q7Z4H3-3;Q7Z4H3-2;Q7Z4H3	2.2472	P49354-2;P49354	NaN	P28074;P28074-3;H0YJM8;P28074-2	1.0417	P10809;E7ESH4;E7EXB4;B7Z712;C9JL25;C9JL19;C9JCQ4;C9J0S9	1.0518	P10253	0.86037	P35268;K7ELC4;K7EMH1;K7ERI7;K7EP65;K7EKS7;K7EJT5;C9JYQ9;Q6P5R6;H0Y8C2	1.0976
Q7Z4V5-2;Q7Z4V5;M0R0J3;K7EQZ6;I3L080;K7EPS6	1.0906	P49368;B4DUR8;P49368-2;E9PRC8;Q5SZX6;Q5SZX9;E9PM09;Q5SZW8;E9PQ35	1.0199	P28161;P28161-2;E9PHN6;F6XZQ7;E9PHN7;E9PLF1;E9PGV1;Q5T8Q9;P46439;Q5T8R1	0.93498	P11021	0.9633	P10412	0.41825	P35270	0.61477
Q7Z7F0-4;Q7Z7F0-3;Q7Z7F0-2;Q7Z7F0	1.0022	P49411;H3BNU3	0.94955	P28331-4;P28331-5;P28331;P28331-2;B4DJ81;P28331-3;C9JPQ5	1.8601	P11142;E9PKE3;E9PNE6;P11142-2;A8K7Q2;E9PN89;E9PLF4;E9PQQ4;E9PQK7;E9PK54;E9PS65;E9PPY6;E9PN25;P54652;E9PM13;E9PI65;E9PSH5	1.0668	P10599;P10599-2	1.0147	P35520;P35520-2;F5H2U1;C9JMA6;H7C2H4	1.0418
Q7Z7K6-3;Q7Z7K6	1.1534	P49419-2;F8VS02;P49419-4;P49419;H0YHM6;F8VVF2;P49419-3	0.71284	P28838-2;P28838;H0Y9Q1	0.96147	P11166;C9JIM8	0.98224	P10606	0.88428	P35573;P35573-2;P35573-3	1.0151
Q86U42-2;Q86U42;H0YJH9;B4DEH8;G3V4T2;Q92843-2	1.3409	P49458;E9PE20;P49458-2	0.99203	P29144;Q5VZU9	1.2306	P11171-7;P11171-2;P11171;P11171-4;P11171-3;E9PEW9;P11171-5;P11171-6	0.88374	P10619	1.0022	P35579;P35579-2;Q5BKV1;B1AH99	0.90742
Q86UP2-2;Q86UP2-3;Q86UP2;B7Z6P3;G3V4Y7;H0YJP2;G3V5P0	NaN	P49588;H3BPK7	0.89927	P29373;Q5SYZ4	1.3214	P11172;B5LY68;P11172-2;E9PFD2;B5LY72;F2Z3P2;F2Z303;F8WDG4	0.99568	P10644;K7EPB2;K7ER48;K7EM13;K7EPR5;K7EQK3;K7EMU2;K7EMZ6;K7EIE5;K7EID3;K7ENR3;K7EJ40;K7EK41	0.95744	P35637-2;P35637;H3BPE7	0.89733
Q8NBS9-2;Q86UY0;Q8NBS9	1.2759	P49591;Q5T5C7	0.87182	P29401;P29401-2;B4E022;E9PFF2;F8W888;F8WAX4	1.0396	P11177-2;P11177;P11177-3;C9J634;F8WF02	1.0587	P10768;H7BZT7	0.95451	P35659;P35659-2;B4DFG0;D6RDA2;D6R9L5;H0Y8X0;H0Y993	0.94536
Q86V81;E9PB61	0.9346	P49643	0.88096	P29966	0.9513	Q5VVL7;P11182	0.98411	P10809;E7ESH4;E7EXB4;B7Z712;C9JL25;C9JCQ4;C9JL19;C9J0S9	1.0654	P35998;B7Z5E2;C9JLS9	0.9123
Q86VH2-2;Q86VH2;Q86VH2-3	3.3305	P49721	0.90755	P30040;F8VY02;P30040-2	0.95258	P11216	0.99706	P11021	0.94027	P36405	1.0528
Q86VP6;Q86VP6-2;Q86VP6-3;H0YH27	1.0123	P49736;H0Y8E6	1.0121	P30041	0.94089	P11233;H7C3P7;P11234;Q6ZS74;B4E040	1.0721	P11142;E9PKE3;E9PNE6;P11142-2;A8K7Q2;E9PN89;E9PLF4;E9PS65;E9PQQ4;E9PQK7;E9PK54;E9PPY6;P54652;E9PM13;E9PN25;E9PI65;E9PSH5	1.07	P36543-2;P36543;P36543-3;C9J8H1	0.56165
Q86Y56;Q86Y56-3;E9PGY2;H0Y650;Q86Y56-2	8.498	P49755;G3V2K7	0.81901	P30043;M0R192;M0QZL1	0.81131	P11387;E5RJ95;E5RFS0;E5RIC7;Q969P6-2;Q969P6;E5RJ33;H0YBR3;H0YC03;E5RGE7;E5RGR4;E5RFE3;E5RGR2	0.81166	P11166;C9JIM8	1.1666	P36551;H0YA22	0.92281
Q8IUE6	1.2607	P49756;P49756-2;P49756-3;E9PQU5;H0YE46	0.96794	P30044-2;P30044;P30044-3;A6NC19	1.0082	P11388;P11388-2;P11388-3;P11388-4;J3KTB7	0.85626	P11172;B5LY68;P11172-2;B5LY72;E9PFD2;F2Z3P2;F2Z303;F8WDG4	0.97897	P36578;H3BM89;H3BTP7;H3BU31	1.1326
Q8N163-2;Q8N163;H0YC69;E5RGU7;E5RFJ3;H0YC58;E5RHJ4;G3V119;H0YB24	1.0414	P49770;H0YK01;H0YJJ8;G3V5E5	1.3208	P30046;B7Z522;A6NHG4;B5MC82;J3KQ18;H7C342	0.97518	P11413;P11413-3;P11413-2;E9PD92;E7EM57;E7EUI8	0.88842	P11177-2;P11177;P11177-3;C9J634;F8WF02	0.99913	P36639-4;P36639-3;P36639-2;P36639	NaN
Q8N183	0.7867	P49773;D6REP8;D6RE99;D6RD60;D6RC06	0.9915	P30049	0.88262	P11717	1.3136	Q5VVL7;P11182	1.1405	P36871;P36871-2;P36871-3	0.80378
Q8N1F7-2;Q8N1F7;H3BNG7;H3BV15;H3BMX0;H3BNN5;H3BRI8;H3BP95;H3BM93;H3BVG0	1.6215	P49792;E9PGT0;H7BZ48;J3KQ37;Q7Z3J3;A6NKT7;Q99666;O14715;J3KNY6;J3KNE0	0.95661	P30050;P30050-2	1.0203	P11766;D6R9G2;D6RFE4;H0YAG8	0.95501	P11216	1.1375	P36954;K7EKS1	1.0453
Q8N1G4	1.3607	P49916;K7EQB6;K7ERZ5;P49916-2	0.95446	P30084	0.99047	P11802;F8VXD2;F8VYH9;B4DNF9;F8VZZ0;F8VTV8;F8VWX7;F8VZ51;F8VZ13;F8W1L8;K7EJ83;H0YAZ9;Q00534;E7EUK8;Q96Q40-2;Q96Q40-4;E5RGN0;Q96Q40-3;O94921-3;F8W6H8;Q96Q40;O94921-2;O94921;F5H6Z0;Q07002;Q07002-2;Q00536;Q00536-3;Q07002-3;Q00537-2;Q00537;Q00536-2;J3QSD7;Q9NYV4-3;Q14004-2;Q9NYV4-2;Q9NYV4;Q14004	1.2076	P11233;P11234;Q6ZS74;B4E040;H7C3P7	1.1198	P36957;B7Z5W8;Q86SW4;H0YJF9;G3V5M3;G3V3F0	0.86378
Q8N475-3;Q8N475-2;Q8N475	0.80649	P50213;H0YL72;P50213-2;B7Z9J8;H0YKD0;H0YLI6;H0YMU3;H0YM64;H0YNF5;H0YM46	1.1818	P30085;Q5T0D2;E9PGI8	0.9057	P11940;P11940-2;E7EQV3;E7ERJ7;H0YBQ4;H0YAR2;Q9H361;H0YBN4;H3BNY3;E5RGH3;E5RH24;E5RJB9;H0YAP2;H0YB86;H3BPI5;Q4VXU2;H0YAS6;H0YB75;Q4VY17;E5RHG7;H0YAS7;Q96DU9;H0YC10;E5RGC4;E5RFD8	1.048	P11387;E5RJ33;H0YBR3;H0YC03;E5RGE7;E5RGR4;E5RFE3;E5RGR2;E5RJ95;E5RFS0;E5RIC7;Q969P6-2;Q969P6	0.88496	P37108;H0YLA2	0.95545
Q8N5M9	NaN	P50402;Q5HY57	0.91931	P30086	0.94516	P12004	0.90869	P11388;P11388-2;P11388-3;P11388-4;J3KTB7	0.85076	P37802;C9J5W6;Q9UI15	0.97251
Q8N8S7-2;Q8N8S7	1.0126	P50454;E9PR70;E9PPV6;E9PKH2;E9PK86;E9PMI5;E9PNX1;H0YEP8;E9PJH8;E9PIG2;E9PRS3;E9PLA6;E9PQ34	0.99641	P30153;F5H3X9;B3KQV6;C9J9C1;E9PH38;E9PPI5;E9PNM7;E9PHZ6	0.97698	P12235	1.3802	P11413;P11413-3;P11413-2;E9PD92;E7EM57;E7EUI8	0.94009	P37837;F2Z393;E9PM01;E9PKI8	0.93189
Q8NBF2-2;Q8NBF2	1.0639	P50502;H7C3I1;Q8IZP2;Q8NFI4;F6VDH7;F8WAQ7	0.99161	P30154-4;P30154;P30154-2;A8MY67;P30154-3;H0YDG7;J3KR29	0.84569	P12236;I7HJJ0	1.0799	P11717	1.0191	P38117;P38117-2;M0QY67	1.0132
Q8NC51;Q8NC51-3;Q8NC51-2;Q8NC51-4	0.95248	P50750;P50750-2	1.1603	P30405;Q2YDB7;H0Y548	1.0482	P12268;H0Y4R1;E7ETK5	0.95757	P11766;H0YAG8;D6R9G2;D6RFE4;D6RAY0	0.87862	P38159;P38159-2;H0Y6E7;H3BT71;Q96E39;B3KRG5;H3BUY5;H3BR27;P38159-3;H3BNC1;O75526;Q8N7X1	1.032
Q8NDC0	0.96025	P50897;E9PSE5;E9PP28;E9PK48;P50897-2;E9PMG2	1.2708	P30419;P30419-2;B7Z8J4;K7EN82;K7EN42;B4DXS1;Q5VUC6;F5H594;O60551;Q5VUC7	0.95074	P12270;Q5SWX9	1.0693	P11802;F8VYH9;F8VTV8;F8VWX7;F8W1L8;F8VXD2;B4DNF9;F8VZZ0;F8VZ51;F8VYY1;Q96BE9;F8VZ13	1.1313	P38646;D6RJI2;D6RA73;H0YBG6;H0Y8S0	0.98511
Q8NGZ4	NaN	P50990;B4DEM7;B4DQH4;H7C4C8;H7C2U0	0.99132	P30520	0.90106	P12277;H0YJG0;G3V4N7;G3V461;H0YJK0;G3V2I1	0.94833	P11940;P11940-2;E7EQV3;E7ERJ7;H0YBQ4;H0YAR2;H0YBN4;Q9H361;H3BNY3;E5RGH3;E5RH24;E5RJB9;H0YAP2;H0YB86;H3BPI5;Q4VXU2;H0YAS6;H0YB75;Q4VY17;E5RHG7;H0YAS7;Q96DU9;H0YC10;E5RGC4;E5RFD8	1.0634	P38919;I3L3F6;I3L2Z3;I3L3H2;I3L2M0;E9PBH4;F8WE11	0.96218
Q8NI27;F2Z2V2	0.8233	P50991;B7Z9L0;P50991-2;B7Z2F4	0.9858	P30566;P30566-2;E7ERF4	1.0051	P12532;P12532-2;E9PCP8;F8WCN3;J3KQ93;C9JSQ1;P17540;C9JJX8;C9J995;C9J8F6;C9J6W7;C9JT96	0.96424	P12004	0.91629	P39019;M0R2L9;M0QXK4;M0QYF7;M0R140	1.0708
Q8TC12-3;Q8TC12-2;Q8TC12	NaN	P51116	1.1804	P30825;Q5JR49	0.70701	P12955-2;P12955;P12955-3	0.97278	P12235	1.5426	P39023;G5E9G0;B5MCW2;H7C422;H7C3M2;F8WCR1;Q92901	1.0398
Q8TEX9;Q8TEX9-2;H0YN14;H0YLV0;H0YL92;H0YK93;H0YKG5;H0YN07;H0YMR4	1.1046	P51148;P51148-2;K7ERI8;K7ERQ8;F8VVK3;K7ENY4;F8VWU4;F8VVZ0;F8VUA5;P61020-2;B4DJA5;P61020;P20339;F8WC93;F8WCY6;F8WD79;F8VPW9;F8VSF8;F8VWZ7	1.011	P30837	0.96612	P12956;B1AHC9;B1AHC8;F5H1I8	1.0112	P12236;I7HJJ0;Q9H0C2	1.0935	P39656;E7EWT1	1.0466
Q8WTR4-4;Q8WTR4-3;Q8WTR4-2;Q8WTR4	1.9127	P51149;C9J592;C9J8S3;C9IZZ0;C9J4V0;C9J4S4;C9J7D1	1.0131	P31150;G5E9U5	0.96392	P13010;C9JZ81;H7C0H9	1.0279	P12268;H0Y4R1;E7ETK5	0.95148	P39748;F5H1Y3;I3L3E9	0.91202
Q8WUM4;Q8WUM4-2;F8WEQ7;F8WBR8;C9IZF9	0.79771	P51531-2;P51531;P51532-5;P51532-2;P51532-3;P51532-4;P51532;Q9HBD4;F6VDE0	1.0194	P31153;B4DN45;Q00266	1.0518	P13284	0.83782	P12270;Q5SWX9	0.93362	P40222	1.5097
Q8WW12;Q8WW12-3;Q8WW12-2	1.07	P51571;H7C1C6;A6NLM8	0.95491	P31350;P31350-2;C9JXC1	0.64652	P13489;E9PMJ3;E9PLZ3;E9PIM9;H0YCR7;E9PIK5;E9PMN0;E9PMA9;E9PR82;E9PMI1	1.0566	P12277;H0YJG0;G3V4N7;G3V461;H0YJK0;G3V2I1	0.96539	P40227;B4DPJ8;P40227-2;Q92526;Q92526-2;B4DX20;J3KRI6	0.9865
Q8WXF1-2;Q8WXF1	0.6551	P51572;P51572-2;C9JSP1;C9JQ75;C9J0M4;C9JMD7;C9JM14	1.0122	P31689;B7Z5C0	1.0314	P13639	1.0476	P12532;P12532-2;E9PCP8;F8WCN3;J3KQ93;C9JSQ1;C9JJX8;C9J995;C9J8F6;C9J6W7;C9JT96;P17540	0.98092	P40429;M0QYS1;Q6NVV1;M0QZU1	1.2162
Q8WZ42-11;Q8WZ42-4;Q8WZ42-7;Q8WZ42-2;Q8WZ42;Q8WZ42-8;Q8WZ42-12;Q8WZ42-5	1.6448	P51659;E7ER27;E7EWE5;P51659-3;P51659-2;G5E9S2;E7ET17;E7EPL9	1.092	P31930	1.0446	P13667;C9JMN9	0.90211	P12955-2;P12955;P12955-3	0.97555	P40925-2;P40925;P40925-3;B9A041;B8ZZ51;C9JF79;C9JRL4	0.92825
Q92499	0.97796	P51665;B4DXI8;H3BNT7;H3BTM8;H3BQV2	0.91564	P31937;H7BZL2	0.93857	P13674-3;P13674-2;P13674	1.169	P12956;B1AHC9;B1AHC8;F5H1I8	1.0165	P40926;E9PDB2;G3XAL0	0.94936
Q92504	0.75102	P51858;A8K8G0;P51858-2;Q5SZ07	0.98806	P31939;E9PBU3;F5GWY2;H7C1S2;H7C084;C9JLK0;H7BZU3;F8WEF0	1.0309	P13693;Q5W0H4;J3KPG2;E9PJF7;Q8TBK7;Q56UQ5;H0YCX0	1.0167	P13010;C9JZ81;H7C0H9	1.0092	P40937-2;P40937;F5H304;C9JH72;F5H5S0;F5H0U6;F8W9B4	0.84704
Q92522	0.79804	P51970;F5H7V7	0.8974	P31942;P31942-3;P31942-2;P31942-4;B4DHY1;P31942-5;P31942-6	0.98698	P13797;B7Z6M1;B4DGB4;F8W8D8;B4DI60;H7C4N2;P13796;Q5TBN3;F2Z2Z9	0.94257	P13073;H3BN72;H3BNV9;Q86WV2;H3BPG0;H3BNI5	0.90076	P40938-2;P40938	1.1154
Q92616	0.85079	P51991;E7EWI9;P51991-2;H7C1J8	1.0419	P31946-2;P31946;Q4VY20;Q4VY19	1.0071	P13804;H0YLU7;P13804-2;H0YKF0;H0YL12;H0YK49;H0YNX6;J3KN60;H0YL83	1.0004	P13284	0.9842	P40939;H0YFD6;B4DYP2	0.89943
Q92621;F2Z2D0;F8WCW4	1.2104	P52272-2;P52272;M0QZM1;M0R019;M0R2T0;M0R0N3;M0R2I7;M0QYQ7;M0R0Y6;M0QY96;M0QYL3	1.0309	P31947-2;P31947	0.96285	Q9BUB1;P13861;H7C1L0;H7C330;H7C4A9;C9J830;P31323	1.0674	P13489;E9PMJ3;E9PLZ3;E9PIM9;H0YCR7;E9PIK5;E9PMN0;E9PMA9;E9PR82;E9PMI1	0.98636	P41091;Q2VIR3;Q2VIR3-2;F8W810;H7BZU1	0.9709
Q92688-2;Q92688;Q5T6W8	0.94943	P52292;J3QLL0;J3KS65;J3QL07	0.9398	P31948;G3XAD8;F5H0T1;F5H783;F5GXD8;H0YGI8	0.97687	P14174	0.99995	P13639	1.0609	P41227-2;P41227;C9JN83;C9JW55;F8W808;A8MWP7;Q9BSU3	0.93699
Q92747;E9PF58;B4DLQ7;F8WFD3	1.0557	P52597	1.0792	P31949	1.0278	P14550;Q5T621	1.0108	P13667	0.91687	P41240;H3BUM9;H3BU69;K7ENL8;K7ES68;P42679-3;K7EQY5;P42679;P42679-2	0.86074
Q92900-2;Q92900	0.74988	P52701-2;P52701;C9JH55;C9J8Y8;C9J7Y7;F8WAX8;F5H2F9;B4DF41	1.0272	P32119;A6NIW5;P32119-2	0.96182	P14618;P14618-3;P14618-2;H3BTN5;H3BQ34;Q504U3;H3BSU3;H3BUW1;H3BTJ2;H3BT25;H3BU13;H3BN34;H3BQZ3;P30613-2;P30613	0.96511	P13674-3;P13674-2;P13674	1.0574	P41250	0.85837
Q92905;E5RFS1;E5RG35;E5RK55	1.047	P52907	0.91452	P32969;D6RAN4;H0Y9V9;E7ESE0;H0Y9R4	1.0654	P14625;H0YIV0;F8W026;Q58FF3	0.95519	P13693;Q5W0H4;Q8TBK7;Q56UQ5;J3KPG2;E9PJF7;H0YCX0	1.0659	P41252;J3KR24;Q5TCC4;Q5TCD1;Q5TCC5;Q5TCD2;Q5TCC6	0.97714
Q92945;M0R0I5;M0QYH3;M0QXW7;M0QYG1;M0R0C6;M0R3J3;M0R251;M0R263	0.85931	P53004;C9J1E1	0.87022	P33176;E9PET8;O60282;J3KNA1;Q12840;O60282-2	0.99556	P14735;P14735-2	0.79547	P13797;B7Z6M1;B4DGB4;F8W8D8;B4DI60;H7C4N2;P13796;Q5TBN3;F2Z2Z9	0.90569	P42025;G5E9Q5	2.0508
Q92979	0.88783	P53007;B4DP62	1.1705	P33993;P33993-3;P33993-2;C9J8M6	1.0271	P14854;K7EQD3	1.0385	P13804;H0YLU7;P13804-2;H0YKF0;H0YL12;H0YK49;H0YNX6;J3KN60;H0YL83	0.98749	P42126-2;P42126;H3BP91;Q96DC0;H3BS70	0.97477
Q93077;Q7L7L0;P04908	0.90873	P53396-2;P53396;B4E3P0;K7ESG8;K7EIE7	0.96802	P34897-3;P34897;P34897-2;B4DLV4;H0YIZ0;G3V2Y4;G3V5L0;G3V4W5;G3V540;G3V2W0;G3V241;G3V3Y8;G3V4T0;G3V4X0;G3V2E4;G3V2D2;G3V2Y1;G3V3C6;B4DPM9	0.99301	P14866;P14866-2;M0QXS5;M0R1W6;M0R076;M0QYL7;H7C464;Q5JB52;B7WPG3;Q8WVV9-4;Q8WVV9;D6W592	0.98554	Q9BUB1;P13861;H7C330;C9J830;H7C1L0	0.89785	P42166	0.85284
Q96A33;Q96A33-2	1.4674	P53597	0.92614	P34932	1.0012	P14868;Q68CR9;H7BZ35;C9J7S3;C9JLC1;H7C278;C9JQM9	1.0258	P14174	1.0237	P42285;F5H7E2	0.98894
Q96AG4	0.96626	P53618;E9PP73	0.79834	P34949;H3BMZ9;H3BPP3;H3BUZ9;P34949-2;H3BPB8;H3BP57;H3BT48;F5GX71;H3BPU7;H3BUG1;H3BU66;H3BPM5;H3BN01;H3BQX0;H3BNY8;H3BT46;B4DYB8	0.92542	P14923	NaN	P14550;Q5T621	0.98548	P42677;Q5T4L4;Q71UM5;H0YMV8;C9J1C5;C9JLI6	1.1132
Q96C01;E7EQY1;C9J2Y4;C9JF51	0.93324	P53621;P53621-2	1.1529	P35232;C9JW96;C9JZ20;E7ESE2;E9PCW0;B4DY47;D6RBK0	0.95848	P14927;P14927-2;B7Z2R2;E5RHG9	0.82547	P14618;P14618-3;P14618-2;H3BTN5;H3BQ34;Q504U3;H3BSU3;H3BUW1;H3BTJ2;H3BT25;H3BU13;H3BN34;H3BQZ3;P30613-2;P30613	0.97303	P42704;B8ZZ38;C9JCA9;H7C3W8	1.0645
Q96CS3	0.90385	P53985;Q5T8R3;Q49A45;Q5T8R5	0.92396	P35237;H0Y3G3;C9JTJ8;C9JVA8;H7BXK7;P50452-2;P50452	0.88044	P15104	0.9338	P14625;Q58FF3;F8W026;H0YIV0	0.94386	P42765;K7EME0	0.81369
Q96CX2;Q68DU8	0.99272	P53999;D6RC37;D6R970	1.0189	P35244;B5MC59	1.2474	P15121;E9PCX2;E9PEF9;C9JRZ8-2;C9JRZ8	0.92653	Q5TZP9;P14635;E9PC90	1.0434	P42766;H0Y3A0;F2Z388	0.99994
Q96EL3	1.1914	P54136;P54136-2;F5H3T8;E5RJM9;E5RH09	1.0314	P35250;P35250-2	0.85614	P15311;E7EQR4	0.99916	P14735;P14735-2	0.93287	P43034;I3L2U8;B4DF38;I3L3N5;I3L495;P43034-2	0.97049
Q96HE7	1.4569	P54577	0.91622	P35251-2;P35251;H0Y8U4	0.60604	P15374;Q5TBK7	0.93786	P14854;K7EQD3	1.0213	P43246;P43246-2;E9PHA6;C9J809	0.99936
Q96I99;H0Y852;E9PDQ8;Q96I99-2	0.96483	P54727;P54727-2;H0Y579;Q5W0S5;Q5W0S4;K7ENJ0;K7ELW1;K7ESE3;P54725	1.0764	P35268;K7ELC4;K7EMH1;K7ERI7;K7EP65;K7EKS7;K7EJT5;C9JYQ9;Q6P5R6;H0Y8C2	0.93323	P15531;P15531-2	0.98665	P14866;P14866-2;M0QXS5;M0QYT0;M0R076;M0R1W6;M0QYL7;H7C464;Q5JB52;B7WPG3;Q8WVV9-4;Q8WVV9;D6W592	0.97103	P43487;C9JXG8;C9JJ34;C9JGV6;H7C137;C9JDM3;C9JIC6;B3KUP2	0.92131
Q96IX5	0.86414	P54886-2;P54886	0.9893	P35270	1.1274	P15880;H0YEN5;I3L404;E9PMM9;E9PQD7;E9PM36;E9PPT0;H3BNG3;H0YE27	1.0602	P14868;Q68CR9;H7BZ35;C9J7S3;C9JLC1;H7C278;C9JQM9	1.0203	P43490;Q5SYT8;F5H246;C9JF35;C9JG65	0.95043
Q96KP4-2;Q96KP4	NaN	P55010;H0YLZ1;H0YN40;H0YK11;H0YMJ8;H0YM54;H0YK29	0.99101	P35520;P35520-2;C9JMA6;F5H2U1;H7C2H4	0.98131	P15924-2;P15924	1.1121	P14923	1.2739	P43686;P43686-2	0.95207
Q96LB4-3;Q96LB4;Q96LB4-4	NaN	P55036;Q5VWC4;H0Y3Y9;A6PVX3;P55036-2;H0Y561	0.95788	P35573;P35573-2;P35573-3	1.1259	P15927;P15927-2;P15927-3;Q5TEJ7;Q5TEJ0	0.92192	P14927;P14927-2;B7Z2R2	0.92545	P45880;P45880-2;P45880-1;B4DKM5;Q5JSD2;Q5JSD1;A2A3S1	1.0574
Q96P70	0.98556	P55060-3;P55060;F8W904;B4DUC5;P55060-2	0.96881	P35579;P35579-2;Q5BKV1;B1AH99;REV__E7EQT4;REV__Q9UKV3-5;REV__Q9UKV3	1.0281	P16152;B4DFK7;E9PQ63;A8MTM1;O75828	0.96948	P15104	0.82663	P45974-2;P45974	0.78076
Q96PK6	1.0313	P55072;C9JUP7;C9IZA5	0.95262	P35637-2;P35637;H3BPE7	0.90672	P16383-2;P16383	NaN	P15121;E9PCX2;E9PEF9;C9JRZ8-2;C9JRZ8	0.92986	P46013-2;P46013	0.5332
Q96QK1;I3L4S0;I3L4P4	1.0569	P55145;H7C2D6	0.9084	P35659;D6RDA2;P35659-2;B4DFG0;D6R9L5;H0Y8X0;H0Y993	0.96097	P16403	0.35028	P15311;E7EQR4	0.9928	P46060;F8W7I9;H0Y4Q3;B0QYT6;B0QYT5;B0QYT4	0.97556
Q96QV6;P16104;Q71UI9-2;C9J0D1;A8MQC5;C9J386;REV__H0Y672;REV__E7EQ67;REV__H7BY63;REV__Q8NB25-4;REV__Q8NB25-2;REV__Q8NB25-3;REV__Q8NB25	0.63246	P55735;A8MXL6;P55735-2;B4DXJ1;E7ERC8	1.0326	P35998;B7Z5E2;C9JLS9	0.88987	P16435;E7EVY7;H0Y4R2;E7EPN3;E7EMD0;F5H468	0.9006	P15374;Q5TBK7	1.0103	P46063	0.92757
Q99417	1.0424	P55795	1.0461	P36404	0.87619	P16615;P16615-5;P16615-2;P16615-3;P16615-4;H7C5W9;Q93084-4;Q93084-2;Q93084-3;Q93084-7;Q93084;Q93084-6;Q93084-5;B3KY17;O14983-2;O14983;J3QSY6;F8VSH0	0.99534	P15531;P15531-2	0.90023	P46087-2;P46087;P46087-4;P46087-3;F5H5X6;F5H359;F5H8G6;F5GWB7;F5H709;F5GYR3	0.74904
Q99436;B4E0P1;Q5TBG5	0.93422	P55809;B7Z528;E9PDW2	0.8678	P36405	0.98583	P16949;P16949-2;A2A2D0;B7Z2Z7;Q9H169;G5EA16;Q9H169-2;E5RIR6;E7EVN3	0.89533	P15880;H0YEN5;E9PQD7;I3L404;E9PMM9;E9PM36;E9PPT0;H3BNG3;H0YE27	1.0595	P46109	0.87375
Q99460-2;Q99460;H7C378	0.49317	P55884;P55884-2;C9JQN7;C9JZG1	1.0899	P36543-2;P36543;P36543-3;C9J8H1	1.1218	P16989;P16989-3;Q9Y2T7;H0YG22	0.84015	P15927;P15927-2;P15927-3;Q5TEJ7;Q5TEJ0	0.92758	P46777;Q5T7N0	1.1008
Q99497;K7ELW0;K7EN27	1.1236	P56192;B3KVK7;A6NC17;H0YHV5;H0YIP0;H0YIC2;F8VPL7;F8VS26;H0YHL6;F8W0M7;F8W0S4;F8VZZ9;H0YI94;H0YI27;F5H2V6	0.95256	P36551;H0YA22;D6RER6	0.85034	P16989-2	1.3259	P16152;B4DFK7;E9PQ63;A8MTM1;O75828	0.99213	P46778;G3V1B3;M0R181;M0R3I5	1.0213
Q99598;Q5VVQ1	1.8561	Q5VTU8;P56381	1.0418	P36578;H3BM89;H3BTP7;H3BU31	1.1397	P17066;P48741	0.96244	P16383-2;P16383	0.71117	P46781;B5MCT8;C9JM19;F2Z3C0;A8MXK4	1.9479
Q99615-2;Q99615;K7EJE9;K7EK03;K7EJL5;K7EN19;K7EJV7;K7ER44;K7ELJ8;K7EPP7;K7ESP1;K7EIH8	1.4089	P56385	6.1783	P36871;P36871-2;P36871-3	0.94819	P17096-2	0.50647	P16403;P16402;P22492;P16401	0.33726	P46783;F6U211;Q9NQ39	0.9751
Q99714-2;Q99714;Q5H928	1.1802	P56537;B7ZBH1;B7ZBG9	0.94045	P36957;B7Z5W8;Q86SW4;H0YJF9;G3V5M3;G3V3F0	0.89068	P17174;B7Z7E9	0.89643	P16435;E7EMD0;F5H468;E7EVY7;H0Y4R2	0.96723	P46940;H0YLE8	1.0953
Q99729-3;D6R9P3;D6RD18;Q99729-4;D6RBZ0;Q99729-2;Q99729	1.0357	P56545;Q5SQP8;P56545-2	0.9589	P37108;H0YLA2	0.92053	P17612-2;P17612;Q15136;K7ERP6;P22694-10;P22694-4;P22694-3;P22694;P22694-5;P22694-7;P22694-6;C9JK39;P22694-9;P22694-2;B1APG2;B1APF8;B1APF9;P22694-8;B1APG3;P22612	0.8319	P16615;P16615-5;P16615-2;P16615-3;P16615-4;H7C5W9;B3KY17;O14983-2;Q93084-4;Q93084-2;O14983;Q93084-3;Q93084-7;Q93084;Q93084-6;Q93084-5;F8VSH0;J3QSY6	0.97219	P46977;E9PNQ1;E9PIJ8;E9PN73;E9PI32;H0YET6	1.0023
Q99832;Q99832-3;B8ZZC9;F5GZK5;Q99832-4;Q99832-2;B7Z1C9;F8WAM2;F8WBP8	0.97745	P56556	1.0786	P37198;M0QXN5	1.0324	P17812;B7Z9C4;B4DR64	0.94931	P16949;P16949-2;A2A2D0;B7Z2Z7;Q9H169;G5EA16;Q9H169-2;E5RIR6;E7EVN3	0.88578	P47755;C9JUG7;B4DG50;F8W9N7	0.88313
Q99880;Q96A08	0.83561	P57088;D6RAA6	0.89638	P37802;C9J5W6;Q9UI15	0.95714	P17858;P17858-2	0.94214	P16989;P16989-3;H0YG22	0.79283	P47813;O14602;A6NJH9	0.91452
Q9BPX3	0.69736	P57105	1.3588	P37837;F2Z393;E9PM01;E9PKI8	0.97098	P17980;E9PM69;E9PKD5;E9PMD8;E9PN50;E9PS45;E9PLG2	0.97203	P17066;P48741	0.97846	P47914	0.85452
Q9BQ69	0.82899	P58107;E9PPU0	1.2117	P38117;P38117-2;M0QY67	1.0097	P17987;E7EQR6;F5H282;E7ERF2;F5GZ03;F5H136;F5GZI8;F5H676;F5H726;F5GYL4;F5H7Y1	0.99529	P17096-2	NaN	P47985;P0C7P4	0.93568
Q9BQA1;H0Y711;B4DP38	1.151	P58546;C9JL85	1.2155	P38159;H0Y6E7;H3BT71;P38159-2;Q96E39;B3KRG5;H3BUY5;H3BR27;P38159-3;H3BNC1;O75526;Q8N7X1	1.0171	P18031;B4DSN5	1.0624	P17174;B7Z7E9	0.93996	P48047;H7C0C1;H7C086;H7C068	0.97184
Q9BR76	1.0158	P60174-1;P60174;P60174-4	1.0068	P38646;D6RJI2;H0YBG6;D6RA73;H0Y8S0	1.003	P18077;C9K025;F8WBS5;F8WB72	1.0494	P17612-2;P17612;Q15136;K7ERP6;P22694-10;P22694-4;P22694-3;P22694;P22612;P22694-5;P22694-7;P22694-6;C9JK39;P22694-9;P22694-2;B1APG2;B1APF8;B1APF9;P22694-8;B1APG3	0.94914	P48147	1.1778
Q9BRA2;I3L0K2;I3L3M7;I3L2R6	1.0964	P60228;H0YBR5;E5RGA2;E5RIT4;E5RHS5;H0YBP5;E5RII3;H0YAW4	0.96313	P38919;I3L3F6;I3L2Z3;I3L3H2;I3L2M0;E9PBH4;F8WE11	0.96897	P18085;C9JPM4;C9JAK5	0.89155	P17812;B4DR64;B7Z9C4	0.98131	P48506	NaN
Q9BS26	1.1165	P60602-2;P60602	1.0645	P39019;M0R2L9;M0QXK4;M0QYF7;M0R140	0.98019	P18124;A8MUD9;C9JIJ5;C9JZ88	1.3379	P17858;P17858-2;F8WEU2	0.93893	P48507	1.2359
Q9BUF5;K7ESM5;K7EL29;K7ES63;K7ESQ3;K7EQT3;K7EJ64;K7ERA8;K7EJZ4;K7EN98;K7EPE5	0.95608	P60842;J3KT12;P60842-2;J3QS69;J3KTB5;J3KSZ0;J3QL43;J3QR64;J3KTN0;J3QLN6;J3KS25;J3QKZ9;J3QL52;J3KSN7;B4E102	1.0766	P39023;G5E9G0;B5MCW2;H7C422;H7C3M2;F8WCR1;Q92901	1.0345	P18206-2;P18206;Q5JQ13;P18206-3;B4DTM7	0.98526	P17980;E9PM69;E9PKD5;E9PMD8;E9PN50;E9PS45;E9PLG2	0.95653	P48556;K7EJR3;K7EJC1;K7ERW6;K7ENY6	1.0729
Q9BUQ8	1.0687	P60866;P60866-2;E5RIP1;E5RJX2;G3XAN0	1.0002	P39656;E7EWT1	1.1232	P18583-6;P18583-2;P18583-10;P18583-3;P18583-4;P18583-7;P18583;P18583-5;P18583-9;P18583-8;H7C1M2;J3QSZ5	0.99433	P17987;E7EQR6;F5H282;E7ERF2;F5GZ03;F5H136;F5GZI8;F5H676;F5H726;F5GYL4;F5H7Y1	0.99045	P48637;B7Z514;B6F210	0.88207
Q9BVK6;F8W7F7;Q7Z7H5-3;Q7Z7H5-2;Q7Z7H5	1.1414	P60891;B1ALA9;B4DNL6;P11908;P11908-2;P21108;B1ALA7;A6NMS2;H7C518;H7C540;D3YTJ7	1.0721	P39748;F5H1Y3;I3L3E9	0.97796	P18669;P15259;Q8N0Y7	0.97139	P18031;B4DSN5	1.176	P48643;E7ENZ3;B7ZAR1;E9PCA1;B4DYD8;D6RIZ7;H0Y914	0.98727
Q9BVP2-2;Q9BVP2	1.2679	P60903	1.0076	P40222	0.87394	P18754;P18754-2;C9JW69;H7C497;C9JRH2;C9JMJ4;C9J3R0;C9JQZ4	1.031	P18077;C9K025;F8WBS5;F8WB72	1.0195	P48735;B4DFL2;B4DSZ6;H0YL11	0.91932
Q9BWD1;B7Z233	1.1097	P61006;B4DEK7;H0YMN7;H0YNE9;F5GY21;Q92930;H0YLJ8;H0YL94;M0R257;P59190-2;P59190;P20337;O95716;P20336;Q96E17	0.92445	P40227;B4DPJ8;P40227-2;J3KRI6	0.9992	P18859;P18859-2;A8MUH2	1.0222	P18085;C9JPM4;C9JAK5	0.83543	P49006	0.80276
Q9BWF3;Q9BWF3-3;D6R9K7;J3QRR5;Q9BWF3-4;Q9BWF3-2;E9PB51;B0LM41	2.175	P61019-2;P61019;E9PKL7;H7C125;Q8WUD1;Q6PIK3	0.80265	P40429;M0QYS1;Q6NVV1;M0QZU1	1.2745	P19174;P19174-2	1.0462	P18206-2;P18206;Q5JQ13;P18206-3;B4DTM7	1.0276	P49189;B4DXY7	0.95732
Q9BWJ5	1.1838	Q9BZU3;P61024;Q5T179	0.99498	P40925-2;P40925;P40925-3;B9A041;B8ZZ51;C9JF79;C9JRL4	0.97295	P19338;H7BY16;C9JYW2;C9JLB1;C9J1H7;C9JWL1	0.98189	P18583-6;P18583-2;P18583-10;P18583-3;P18583-4;P18583-7;P18583;P18583-5;P18583-9;P18583-8;H7C1M2	1.0415	P49207	0.89078
Q9BX68	0.5518	P61026	0.81802	P40926;E9PDB2;G3XAL0	0.94056	P19387	0.79431	P18669;P15259;Q8N0Y7	0.98782	P49257	1.0747
Q9BXJ9;Q9BXJ9-4;Q6N069-5;Q6N069-4;Q6N069-3;Q6N069-2;Q6N069	1.2558	P61081;M0QYI6;M0QX69	0.99451	P40938-2;P40938	0.95755	P19388	0.94373	P18754;P18754-2;C9JW69;H7C497;C9JRH2;C9JMJ4;C9J3R0;C9JQZ4	0.991	P49321;P49321-3;P49321-2;Q5T624;F5H3J2;H0YDS9;E9PI86;E9PRH9;H0YF33;E9PPQ8;E9PPR5	1.0062
Q9BY77-2;Q9BY77;F8WCX5;Q6R954;B4DMM2;F8WEE2	0.93748	P61088;F8VQQ8;Q5JXB2;F8VSD4;F8VV71;F8VZ29	0.93132	P40939;H0YFD6;B4DYP2	1.0231	P19525-2;P19525	0.96273	P18859;P18859-2;A8MUH2	0.99435	P49327;J3KTF0	0.99401
Q9C0C9;K7EQ12;K7ES11	2.474	P61106	0.80745	P41091;Q2VIR3;Q2VIR3-2;F8W810;H7BZU1	0.94787	P19623;K7EL89;K7EKM4;K7EQ47;K7ESL0	1.0476	P19338;H7BY16;C9JYW2;C9JLB1;C9J1H7;C9JWL1	0.98317	P49354-2;P49354	NaN
Q9GZL7	0.91455	P61158;B4DXW1;F5H3P5;F8WEW2;F8WE84	1.0453	P41208	1.0369	P19784;H3BNI9;H3BV19;H3BSA1	1.0227	P19387	1.1424	P49368;B4DUR8;P49368-2;E9PRC8;Q5SZX6;E9PM09;E9PQ35;Q5SZX9;Q5SZW8	0.98791
Q9H0U4;E9PLD0;P62820;E7END7;B7Z8M7;P62820-2;Q92928;P62820-3;E7ETK2	0.92107	P61201;P61201-2;B4DIH5;H0YKU5;H0YM03	0.99291	P41227-2;P41227;C9JN83;F8W808;A8MWP7;C9JW55;Q9BSU3;H0Y8T0	0.95737	P20042	0.95877	P19388	0.89986	P49406	0.88231
Q9H1E3;Q9H1E3-2	0.83672	P84077;P61204;B7ZB63;F5H423;F5H0C7;H0YGG7	0.88437	P41240;H3BUM9;H3BU69;K7ENL8;K7ES68;P42679-3;K7EQY5;P42679;P42679-2	0.93541	P20290	NaN	P19525-2;P19525	0.94912	P49411;H3BNU3	1.0031
Q9H2M9	NaN	P61221;D6R9I9;H0Y990;D6RGF4	1.0207	P41250	0.96277	P20290-2;D6RDG3;H0Y9Y1	1.0507	P19623;K7EL89;K7EKM4;K7EQ47;K7ESL0	1.0226	P49419-2;P49419;F8VS02;P49419-4;P49419-3;H0YHM6;F8VVF2	0.85686
Q9H3K6;Q9H3K6-2;H3BV85;H3BTW0;H3BVE0	1.0061	P61224-2;P61224-3;P61224;P61224-4;P62834;F5H823;B7ZB78;F5GZG1;E7ESV4;F5H7Y6;A6NIZ1;F5H4H0;F5GYH7;F5H077;F5GWU8;F5H491;F5H0B7;F5H500;F5H6R7;F5H004;F5GYB5;F5GX62;F8WBC0	1.1536	P42025;G5E9Q5	1.6485	P20618	0.96505	P19784;H3BV19;H3BSA1;H3BNI9	0.97186	P49458;E9PE20;P49458-2	1.0309
Q9H3N1;G3V448	0.90467	P61247;D6RG13;D6RAT0;H0Y9Y4;F5H4F9;D6RB09;E9PFI5;H0Y8L7;D6R9B6;D6RAS7;D6RED7;D6RI02;D6RGE0	1.1036	P42166	1.0028	P20671	0.83267	P20042	1.0268	P49588;H3BPK7	0.84134
Q9H444	0.44241	P61254;J3QRI7;J3QQQ9;J3QQV1;J3KTJ8;J3QRC4;J3KSS0;J3KS10	0.97128	P42677;Q5T4L4;C9J1C5	1.0967	P20674;H3BNX8;H3BRM5;H3BV69;H3BRI0	0.98383	P20290-2;P20290;D6RDG3;H0Y9Y1	1.0585	P49591;Q5T5C7	0.8805
Q9H773;H3BSA6	0.93219	P61289;P61289-2;B3KQ25;K7ESG5;K7EMD0;K7EPX6;K7EKR3;K7ENH2;B7Z8D3	1.072	P42704;B8ZZ38;C9JCA9;H7C3W8	1.0481	P20700;E9PBF6	1.0229	P20338	1.1153	P49643	0.85892
Q9H7S9;Q96F45-3;Q96F45-2;Q96F45	0.97215	P61353;K7ELC7;K7EQQ9;K7ERY7	1.0509	P42765;K7EME0	1.286	P21266	1.1159	P20618	0.90611	P49721	0.98555
Q9H993;F5GZY1	3.1339	P61586;Q5JR08;P08134;E9PN11;Q5JR07;C9JNR4;E9PQH6;C9JX21;Q5JR05;E9PLA2;C9J1T2;C9JRM1;Q5JR06	0.94171	P42766;H0Y3A0;F2Z388	0.96528	P21281;H0YC04;H0YC45;C9J5E3;C9JNS9;C9JL73;P15313	1.0584	P20645;F5GXE0;H0YGE9;F5GXU0;H0YGT2;F5H883	1.0549	P49736;H0Y8E6	1.0682
Q9H9B4;D6RAE9;D6RDG7;D6RFI0	0.82096	P61604;B8ZZL8;B8ZZ54	1.0107	P43034;I3L2U8;B4DF38;I3L3N5;P43034-2;I3L495	0.98187	P21333-2;P21333;Q5HY54;E9PHF0;F8WE98;H0Y5C6;H0Y5F3	0.94186	P20674;H3BNX8;H3BRM5;H3BV69;H3BRI0	0.93451	P49753;G3V4F2;Q86TX2;B3KSA0;P49753-2	0.77385
Q9HB71;Q5R370;B2ZWH1;Q9HB71-2	1.0781	P61758;F5H2A7	1.3674	P43487;C9JXG8;C9JJ34;C9JGV6;H7C137;C9JDM3;C9JIC6;B3KUP2	0.96941	Q9HBB2;P21399;Q5VZA6	0.81039	P20700;E9PBF6	0.98669	P49755;G3V2K7	1.0779
Q9NP73-4;Q9NP73-3;Q9NP73	NaN	P61962;E9PCY4;B4E039	0.77389	P43490;Q5SYT8;F5H246;C9JF35;C9JG65	0.9646	P21796;C9JI87	1.0091	P21266;Q5T8Q9;P46439;Q5T8R1	1.0872	P49756;P49756-2;P49756-3;H0YE46;E9PQU5	0.70473
Q9NP79;E7ETQ7;Q5TGM0	0.88915	P61964	0.96703	P43686;P43686-2	1.0039	P21912	1.0942	P21281;H0YC04;C9J5E3;C9JNS9;C9JL73;P15313	1.0615	P49770;H0YK01;H0YJJ8;G3V5E5	1.0466
Q9NQG5	0.82808	P61978;P61978-2;Q5T6W1	1.0056	P45880;P45880-2;P45880-1;B4DKM5;Q5JSD2;Q5JSD1;A2A3S1	1.0662	P21964-2;P21964;E7EMS6;F8WBW9;E7EUU8	1.0901	P21333-2;P21333;Q5HY54;E9PHF0;F8WE98;H0Y5C6;H0Y5F3	0.93904	P49773;D6REP8;D6RE99;D6RD60;D6RC06	0.98978
Q9NR30-2;Q9NR30;Q9BQ39	0.99207	Q5T6W5;P61978-3;Q5T6W2	0.97615	P45974-2;P45974;H7C5J3;Q92995-2;Q92995	0.82948	P22033	1.7288	Q9HBB2;P21399;Q5VZA6	0.97873	P49792;E9PGT0;J3KQ37;Q7Z3J3;A6NKT7;Q99666;O14715;J3KNY6;J3KNE0;H7BZ48;Q99666-2;F8W705;P0DJD0;J3QTV4;P0DJD1;F8VYC4	0.97474
Q9NR31;D6RAA2;Q5SQT8;D6RDB2;D6RD69;Q9Y6B6;H0Y5E8;B4DQ19	0.92234	P61981	0.9699	P46013-2;P46013	0.86521	P22059;H0YCV6	0.68681	P21796;C9JI87	1.0213	P49915;F8W720	0.99311
Q9NR45;Q5TBR0;Q5TBR1	1.0326	P62072	NaN	P46060;F8W7I9;H0Y4Q3;B0QYT6;B0QYT5;B0QYT4	0.99123	P22087;M0R299;M0QXL5;M0R0P1;M0R2Q4;M0R2U2;M0R1H0;M0R2B0;A6NHQ2	0.99098	P21912	0.99833	P49916;P49916-2;K7EQB6;K7ERZ5	1.8206
Q9NRN7;B4DDW7;E9PNF3;E9PLW6	0.98302	P62081;B5MCP9	1.0526	P46063;F5H2L2;F8WA66;F8WD97;F5H4P4;F5H3W0	1.0239	P22102;P22102-2;F8WD69;B4DJ93;C9JBJ1;C9JTV6;C9JZG2;C9JKQ7;H7C489;H7C366	0.98211	P21964-2;P21964;E7EMS6;F8WBW9;E7EUU8	1.003	P50213;H0YL72;P50213-2;B7Z9J8;H0YLI6;H0YMU3;H0YKD0;H0YM64;H0YNF5;H0YM46	0.97838
Q9NRW3	0.82863	P62136;E9PMD7	0.99641	P46087-2;P46087;P46087-4;P46087-3;F5GYR3;F5H5X6;F5H359;F5H8G6;F5GWB7;F5H709	0.90661	P22234;E9PBS1;P22234-2;D6RF62	0.99704	P22059;H0YCV6	0.81097	P50402;Q5HY57	1.072
Q9NRW7	NaN	P62191;B4DR63;G3V4X1	0.9265	P46109	0.92439	P22314;Q5JRR6;Q5JRR9;Q5JRS0;Q5JRS1;Q5JRS3;Q5JRS2	0.96174	P22087;M0R299;M0QXL5;M0R2Q4;M0R0P1;M0R2U2;M0R1H0;M0R2B0;A6NHQ2	1.0234	P50454;E9PKH2;E9PR70;E9PPV6;H0YEP8;E9PJH8;E9PIG2;E9PRS3;E9PNX1;E9PK86;E9PMI5;E9PLA6;E9PQ34	0.86214
Q9NRX4;Q9NRX4-2	0.9662	P62195;P62195-2;J3QQM1;J3QSA9;J3KRP2;J3QRW1;J3QLH6;J3QSE0;J3KTQ9;J3QRR3;Q8NB90-3;Q8NB90-2;Q8NB90	0.91571	P46777;Q5T7N0	1.1318	P22392-2;Q32Q12;P22392;J3KPD9;E7ERL0;E5RHP0;O60361;F6XY72;C9K028	1.0149	P22102;P22102-2;F8WD69;B4DJ93;C9JBJ1;C9JTV6;C9JZG2;C9JKQ7;H7C366;H7C489	0.99255	P50502;H7C3I1;Q8IZP2;Q8NFI4;F6VDH7;F8WAQ7	0.89796
Q9NS69	1.0968	P62241;Q5JR95	1.1023	P46778;G3V1B3;M0R181;M0R3I5	1.0375	P22626;P22626-2	1.0466	P22234;E9PBS1;P22234-2;D6RF62	0.99521	P50552;K7EM16	0.54014
Q9NSD9;F5H6Y1	0.93961	P62244;I3L3P7;I3L246;H3BV27;H3BT37;I3L303;H3BVC7	1.0674	P46781;B5MCT8;C9JM19;F2Z3C0;A8MXK4	1.8418	P22695;H3BRG4;H3BSJ9;H3BP04;H3BUE4;H3BUI9	1.0371	P22314;Q5JRR6;Q5JRR9;Q5JRS0;Q5JRS1;Q5JRS3;Q5JRS2	0.99491	P50750;P50750-2	1.1987
Q9NUU7;H3BTB3;I3L0H8;J3QRH0;H3BSL8;H0YD26;H3BMQ5;H3BN59;Q9UHL0-2;B4DRZ7;I3L352;E9PR46;J3QL17;Q9UMR2;Q9UHL0;H3BQK0	0.95954	P62258;P62258-2;B4DJF2;I3L3T1;K7EM20;K7EIT4;I3L0W5	1.0048	P46783;F6U211;Q9NQ39	0.93458	P22830;P22830-2	1.121	P22392-2;Q32Q12;P22392;J3KPD9;E7ERL0;E5RHP0;O60361;F6XY72;C9K028	1.0366	P50897;E9PP28;E9PK48;E9PMG2;E9PSE5;P50897-2	1.0713
Q9NVP1	1.0367	P62263;H0YB22;E5RH77	0.96618	P46821;D6RCL2;D6RGJ3;D6RA32	0.49861	P23193;P23193-2;E5RIS7;E5RJ93;B7Z4S1;E5RK46;E5RFI1	0.94759	P22626;P22626-2	1.057	P50990;B4DEM7;B4DQH4;H7C4C8;H7C2U0	0.97709
Q9NWY4	0.95274	P62266;D6RD47	1.0036	P46940;H0YLE8;E9PDT6;Q13576-2;J3KR91;F5H7S7;E7EWC2;Q13576;F2Z2E2;Q86VI3	0.97386	P23246;P23246-2;H0Y9K7;H0Y9U2	1.0171	P22681	NaN	P50991;P50991-2;B7Z9L0;B7Z2F4	0.94664
Q9NX40;D6R918;D6RBC5;D6RDI5;D6RA54;D6RC55;D6RG39;D6RIT9;D6RDK6;Q9NX40-3;Q9NX40-2;Q9NX40-4;D6RBN5	1.0737	P62269;J3JS69	1.0864	P46977;E9PNQ1;E9PIJ8;E9PN73;E9PI32;H0YET6	0.99981	P23258;Q9NRH3;K7EKE5;K7EIS0	0.97666	P22695;H3BRG4;H3BSJ9;H3BP04;H3BUE4;H3BUI9	1.0636	P51116	0.93048
Q9NX58	0.74251	P62273;P62273-2	1.0845	P47755;C9JUG7;B4DG50;F8W9N7	0.69587	P23284	0.97684	P22830;P22830-2;K7EPN2;K7EKP7;K7ELX4	0.94585	P51148;P51148-2;F8VWU4;F8VVZ0;F8VUA5;F8VVK3;K7ERI8;P61020-2;B4DJA5;P61020;P20339;K7ERQ8;F8WC93;F8WCY6;F8WD79;F8VPW9;F8VSF8;F8VWZ7;K7ENY4	1.1094
Q9NYB0	1.3899	P62277;J3KMX5;E9PS50	0.99823	P47813;O14602;A6NJH9	0.95959	P23368;P23368-2	1.378	P23193;P23193-2;E5RJ93;E5RIS7;B7Z4S1;E5RK46;E5RFI1;Q5JRI7;Q15560	0.9539	P51149;C9J8S3;C9IZZ0;C9J592;C9J4V0;C9J4S4;C9J7D1	0.95713
Q9NZ45	2.0979	P62280;M0QZC5;M0R1H6;M0R1H5	1.0541	P47914	0.93577	P23381;P23381-2;H0YJP3;G3V3H8;G3V3Y5;G3V277;G3V2F2;G3V3R3;G3V4S4;G3V313;G3V339;G3V2C0;G3V4C7;G3V4N8;G3V5W1;G3V3S7;G3V3X0;G3V423;G3V3P2;G3V227;G3V5U1;G3V456	0.95474	P23246;P23246-2;H0Y9K7;H0Y9U2	1.03	P51153	1.0946
Q9NZI8;Q9NZI8-2;O00425	0.92505	P62304;A6NHK2	1.0349	P47985;P0C7P4	0.97114	P23396;J3KN86;E9PL09;E9PPU1;E9PL45;F2Z2S8;H0YCJ7;H0YF32;H0YEU2;E9PQ96;E9PJH4;E9PK82;E9PSF4;E9PQX2;H0YES8;E9PJN9	1.0523	P23258;Q9NRH3;K7EKE5;K7EIS0	1.0258	P51398-2;P51398-3;P51398	1.2233
Q9NZL9-4;Q9NZL9-2;Q9NZL9;H7C0X7;Q9NZL9-3	0.93013	P62306;F8W0W6	0.93434	P48047;H7C0C1;H7C068;H7C086	0.98674	P23434	0.95945	P23284	0.97746	P51531-2;P51531;P51532-5;P51532-2;P51532-3;P51532-4;P51532;Q9HBD4	0.85321
Q9P015;E5RIZ4	1.1168	P62312	0.79696	P48147	1.0532	P23511-2;P23511	NaN	P23368;P23368-2	1.0791	P51571;H7C1C6;A6NLM8	0.95459
Q9P016-2;Q9P016;E9PPQ6	1.2303	P62314;J3QLI9	1.1407	P48163;F5H4W0;B4DZ70	1.0534	P23526;P23526-2	0.98888	P23381;P23381-2;H0YJP3;G3V3H8;G3V3Y5;G3V277;G3V5W1;G3V3S7;G3V3X0;G3V423;G3V3P2;G3V227;G3V5U1;G3V456;G3V2F2;G3V3R3;G3V4S4;G3V313;G3V339;G3V2C0;G3V4C7;G3V4N8;G3V2Y7	0.96224	P51572;P51572-2;C9JSP1;C9JQ75;C9J0M4;C9JMD7;C9JM14	0.91556
Q9P032	NaN	P62316;P62316-2;K7EJB5;K7ERG4	0.96416	P48507	0.89553	P23528;G3V1A4;E9PP50;E9PK25;E9PQB7;E9PLJ3;E9PS23	1.0081	P23396;J3KN86;E9PL09;E9PPU1;E9PL45;F2Z2S8;H0YCJ7;H0YEU2;E9PQ96;E9PJH4;H0YF32;E9PK82;E9PSF4;E9PQX2;H0YES8;E9PJN9	1.0598	P51659;E7ER27;E7EWE5;P51659-3;P51659-2;G5E9S2;E7ET17;E7EPL9	0.93493
Q9P035;B4DRF4;H3BS72;H3BPZ1	0.92959	Q5T4B6;P62328	1.0502	P48556;K7EJC1;K7EJR3;K7ERW6	1.0293	P23919;H7C312;H7BZ20;G5E9E9	0.90793	P23434	1.0215	P51665;H3BNT7;H3BTM8;B4DXI8;H3BQV2	0.94242
Q9P0L0;Q9P0L0-2	1.0636	P62333;H0YJC0;H0YJS8;H0YJE9;H0YJT1;H0YJD2;H0YJY8;H0YJX2	0.99725	P48637;B7Z514;B6F210	0.92394	P23921;E9PD78;F5H861;E9PL69	1.0609	P23511-2;P23511	0.7293	P51858;A8K8G0;P51858-2;Q5SZ07	0.96517
Q9P1F3;Q5SZC9	1.0762	P62424;Q5T8U2;Q5T8U3	0.8938	P48643;E7ENZ3;B7ZAR1;E9PCA1;B4DYD8;D6RIZ7;H0Y914	0.97997	P24534;F2Z2G2;C9JZW3;F8WF65	0.97852	P23526;P23526-2	0.9739	P51970;F5H7V7	0.92994
Q9P258	1.0675	P62495;Q96CG1;B7Z7P8;D6RCB3;D6RJE8;I3L492	1.0508	P48729;P48729-2;H0Y9X2;D6REM4;E7ETM0;Q71TU5;Q8N752	1.0245	Q5QNZ2;P24539	0.99399	P23528;G3V1A4;E9PP50;E9PK25;E9PQB7;E9PLJ3;E9PS23	0.97971	P51991;E7EWI9;P51991-2;H7C1J8	1.0137
Q9P2E9-3;Q9P2E9-2;Q9P2E9;F8W7S5	1.0053	P62633-2;P62633-5;P62633;P62633-4;P62633-6;B4DP17;P62633-3	1.1021	P48735;B4DFL2;B4DSZ6;H0YL11	0.97586	P24666;G5E9R5;B5MCC7;P24666-3;P24666-2;F2Z2Q9;D3YTI2	1.004	P23786	0.82022	P52272-2;P52272;M0QZM1;M0R019;M0R2T0;M0R2I7;M0R0N3;M0QYQ7;M0R0Y6;M0QY96;M0QYL3	1.0524
Q9UBB4-2;Q9UBB4;B1AHE3	1.0249	P62701;A6NH36;C9JEH7;P22090;Q8TD47;C9JQ55	0.99615	P49006	0.90061	P24752;H0YEL7;G3XAB4;E9PRQ6;E9PKF3	0.98066	P23919;G5E9E9;H7C312;H7BZ20	0.92964	P52292;J3QLL0;J3KS65;J3QL07	0.79467
Q9UGP8	1.2869	P62750;H7BY10;K7EJV9;K7ERT8;A8MUS3;K7EMA7	0.97489	P49189;B4DXY7	0.90125	P24928;Q6NX41	0.60773	P23921;E9PD78;F5H861;E9PL69	0.97183	P52294;C9JYI4;C9J352;C9JWD9;F2Z3G4;C9J4U1	3.1349
Q9UHD1;E9PPQ5;Q9UHD1-2;E9PIZ4;E9PSD5;E9PL00;E9PHZ2	0.83492	P62753;A2A3R5;A2A3R7	1.0971	P49207	0.83348	P25205;B4DWW4;J3KQ69;Q7Z6P5	1.0639	P24534;F2Z2G2;C9JZW3;F8WF65	1.0095	P52597	1.0274
Q9UHI6	0.89925	P62805	1.0053	P49257	0.89685	P25398	1.0522	Q5QNZ2;P24539	1.036	P52907	0.97241
Q9UHV9	1.1719	P62820;E7END7;B7Z8M7;P62820-2	1.5051	P49321;P49321-3;P49321-2;Q5T624;F5H3J2;H0YDS9;H0YF33;E9PI86;E9PRH9;E9PPQ8;E9PPR5	0.99897	P25685;B4DX52;M0R080;M0R128;M0R1D6;M0QZD0;M0QYT3;M0QXK0	1.0988	P24666;G5E9R5;B5MCC7;P24666-3;P24666-2;F2Z2Q9;D3YTI2	0.98828	P53004;C9J1E1	0.93772
Q9UHX1-4;Q9UHX1-6;Q9UHX1-3;Q9UHX1-5;Q9UHX1-2;Q9UHX1;E9PQ56;H0YEM1;E9PMU7;E9PN18;E9PL19;H0YCP8	1.0043	P62851	1.0076	P49327	0.9871	P25705;P25705-2;K7ENP3;K7EK63;K7EK77;K7ENJ4;K7ERX7;K7EQT2;K7EJP1;K7EKV9;K7ESA0	1.0139	P24752;H0YEL7;G3XAB4;E9PRQ6;E9PKF3	0.95339	P53007;B4DP62	1.0707
Q9UIG0-2;Q9UIG0	2.4105	P62854;Q5JNZ5	1.1149	P49354-2;P49354;E9PPM9;H0YCW1;H0YE66;E9PQP6	0.48984	P25786;P25786-2;F5GX11;B4DEV8	0.95351	P24928;Q6NX41	0.9289	P53396;P53396-2;B4E3P0;K7ESG8;K7EIE7	0.96498
Q9UIJ7-2;Q9UIJ7	0.6025	P62857	1.0508	P49368;P49368-2;B4DUR8;E9PRC8;Q5SZX6;E9PM09;E9PQ35;Q5SZX9;Q5SZW8	1.0103	P25787;C9JCK5;Q6MZI6;H7C402;H3BT36	0.96214	P25205;B4DWW4;J3KQ69;Q7Z6P5	1.0433	P53582;F5GXS7;H0YAI3	1.2417
Q9UL25	0.99167	P62861;E9PR30	1.0134	P49406	1.9399	P25788-2;P25788;G3V4X5	0.91975	P25391	NaN	P53597	0.90226
Q9ULC4-2;Q9ULC4;Q9ULC4-3	0.91756	P62873;B1AKQ8;F6X3N5;F6UT28;B3KVK2	0.94849	P49411;H3BNU3	0.95948	P26038	0.96565	P25398	1.0578	P53618;E9PP73;E9PP63;E9PKQ1	0.97305
Q9UMS4;F5GY56;F5H2I0	1.0582	P62875	1.1089	P49419-2;P49419;F8VS02;P49419-4;P49419-3;H0YHM6;F8VVF2	0.83505	P26196	0.99552	P25685;B4DX52;M0R080;M0R128;M0R1D6;M0QZD0;M0QYT3;M0QXK0	0.93538	P53621;P53621-2	0.99236
Q9UMX0-2;Q9UMX0	0.83801	P62877	0.8805	P49458;E9PE20;P49458-2	0.97709	P26373;P26373-2;J3QSB4;H3BTH3;J3KS98;H3BUK8	0.96641	P25705;P25705-2;K7ENP3;K7EK63;K7EK77;K7ENJ4;K7ERX7;K7EQT2;K7EJP1;K7EKV9;K7ESA0	1.0127	P53985;Q5T8R3;Q49A45;Q5T8R5	0.88451
Q9UN76	NaN	P62879;E7EP32;C9JZN1;C9JIS1;C9JXA5;Q9HAV0;C9JD14;F5H100;F5H8J8;B3KPU1;F5H0S8;E9PCP0;P16520	0.98041	P49588;H3BPK7	0.97251	P26583;D6R9A6	0.91979	P25786;P25786-2;F5GX11;B4DEV8	0.95117	P53999;D6RC37;D6R970	0.90483
Q9UN86-2;Q9UN86;D6RAC7;D6RB17;D6RGJ4	1.0555	Q59GN2;P62891	1.0564	P49591;Q5T5C7	0.81219	P26599;P26599-2;P26599-3;A6NLN1;K7ES59;K7ELW5;K7EKJ7;K7EK45	0.93105	P25787;C9JCK5;Q6MZI6;H7C402;H3BT36	0.9644	P54136;P54136-2;F5H3T8;E5RH09;E5RJM9	1.0676
Q9UNE7-2;Q9UNE7;H3BS86;H3BUD0	0.92107	P62899;H7C2W9;C9JU56;B7Z4E3;P62899-3;P62899-2;B7Z4C8;B8ZZK4	1.0285	P49643	0.96935	P26639;P26639-2;E7ERI3;G3XAN9;D6R9F8;D6RCA5;D6RDJ6;D6RBR8;A2RTX5-2;B7ZLP8;A2RTX5;D6RJ97;D6RHV7;D6RCS6	0.97571	P25788-2;P25788;G3V3W4;G3V5N4;G3V4X5	0.98596	P54577	0.83907
Q9UNF0-2;Q9UNF0	1.1242	P62906	1.1208	P49721	0.96274	P26641;B4DTG2;E7EMT2	1.0057	P26038	0.92923	P54727;Q5W0S5;Q5W0S4;P54727-2;H0Y579;K7ENJ0;K7ELW1;K7ESE3;P54725	0.90883
Q9UNM6;Q9UNM6-2;J3KNQ3;H0YD73;E9PL38	1.0305	P62913;Q5VVC9;Q5VVC8	0.98937	P49736;H0Y8E6	0.99726	P27144;D3DQ64	1.0325	P26196	1.0009	P54886-2;P54886	1.0743
Q9UNS2;J3QKR0;C9JLV5;H7C3P9;Q9UNS2-2;J3QL22;J3QS85;J3KTQ1;K7ES36	0.97089	P62917;E9PIZ3;E9PKU4;E9PKZ0;E9PP36;G3V1A1	0.9578	P49755;G3V2K7	0.87266	P27348;E9PG15	1.009	P26368-2;P26368;K7ENG2;K7ELP8	0.95239	P55010;H0YLZ1;H0YN40;H0YK11;H0YMJ8;H0YM54;H0YK29	0.9039
Q9UNX4	0.4111	P62937;F8WE65;C9J5S7;Q567Q0;Q9Y536;F5H284;E5RIZ5;A2BFH1	1.0153	P49756;P49756-2;P49756-3;H0YE46;E9PQU5	0.95841	P27635;F8W7C6;H7C123;H7C2C5;B8A6G2;A6QRI9;Q96L21;H7C2U2	1.0317	P26373;P26373-2;J3QSB4;H3BTH3;H3BUK8;J3KS98	0.97203	P55036;Q5VWC4;H0Y3Y9;A6PVX3;P55036-2;H0Y561	0.86842
Q9UQ35	0.90124	P62942;Q5W0X3;Q1JUQ5	1.0779	P49770;H0YJJ8;G3V5E5;H0YK01	0.86307	P27694;I3L4R8;I3L524;I3L2M5	0.95564	P26583;D6R9A6	0.90356	P55060-3;P55060;F8W904;B4DUC5;P55060-2	1.0311
Q9UQ80;F8VTY8;F8VRZ3;F8VR77;F8W0A3;H0YIN7;F8VZ69	0.99379	P62979	0.9324	P49773;D6REP8;D6RE99;D6RD60;D6RC06	0.98231	P27695;G3V3M6;G3V5Q1;G3V3C7;G3V5D9;G3V5M0;G3V359;H7C4A8;G3V3Y6;G3V574	0.97882	P26599;P26599-2;P26599-3;A6NLN1;K7ES59;K7ELW5;K7EKJ7;K7EK45	0.95028	P55072;C9JUP7;C9IZA5	0.89342
Q9UQE7	1.1989	P62987;J3QS39;J3QTR3;F5H6Q2;F5GYU3;F5H2Z3;M0R2S1;F5H265;F5H7Y5;B4DV12;F5H388;F5H747;F5GXK7;J3QKN0;P0CG47;Q96C32;F5H7K6;F5H041;P0CG48;M0R1V7;F5H4D8;M0R1M6;J3QLP7;J3QRK5;J3QSA3;K7EMA8;F5GZ39;J3KSM4	0.88235	P49792;E9PGT0;F8WBP7	1.1214	P27797;K7EJB9;K7EL50	0.93991	P26639;P26639-2;E7ERI3;G3XAN9;D6R9F8;D6RCA5;D6RDJ6;D6RBR8;A2RTX5-2;B7ZLP8;A2RTX5;D6RJ97;D6RHV7;D6RCS6	0.93261	P55145;H7C2D6	0.8824
Q9Y224;G3V4C6;H0YJB9;G3V4E7	0.92489	P62993;P62993-2;J3KT38;J3QRL5	1.1288	P49915;F8W720	1.0072	P28066;P28066-2	0.98507	P26641;B4DTG2;E7EMT2	1.0029	P55735;A8MXL6;P55735-2;B4DXJ1;E7ERC8	0.85146
Q9Y230;B3KQ59;M0R0Y3;M0QXI6;M0R0Z0	1.0039	P62995-3;P62995;H7BXF3;H7C2L4	1.0298	P49916;P49916-2;K7EQB6;K7ERZ5	1.1706	P28070	0.97724	P27144;D3DQ64	1.0791	P55795	0.9569
Q9Y237;Q9Y237-2;H0Y4T6;J3KMW3;H0Y8P6;H0Y610;Q9Y237-3	1.3371	P63000;P63000-2;B1AH77;B1AH80;P15153;J3KSC4;J3QLK0;B1AH78;P60763	1.0315	P50213;H0YL72;P50213-2;B7Z9J8;H0YLI6;H0YMU3;H0YKD0;H0YM64;H0YNF5;H0YM46	1.0586	P28072;I3L3X7	0.97372	P27348;E9PG15	0.98738	P55809;B7Z528;E9PDW2	1.2162
Q9Y265;Q9Y265-2;E7ETR0;H7C4G5;J3QLR1;H7C4I3	1.1526	P63104;E7EX29;E7ESK7;B0AZS6;E7EX24;E5RGE1;E5RIR4;E9PD24;E7EVZ2;B7Z2E6;H0YB80	1.0246	P50402;Q5HY57;F8WEQ1	1.0624	P28074;P28074-3;H0YJM8;P28074-2	1.0453	P27635;F8W7C6;H7C123;H7C2C5;B8A6G2;A6QRI9;Q96L21;H7C2U2	1.0562	P55884;P55884-2;C9JZG1;C9JQN7	1.0775
Q9Y266	0.86531	P63151;P63151-2;E5RIY1;Q66LE6;E5RFR9;Q00005-6;Q00005;Q00005-2;Q00005-3;Q00005-4;Q00005-5;Q00005-7	0.82875	P50454;E9PKH2;E9PR70;E9PPV6;E9PK86;E9PMI5;E9PNX1;H0YEP8;E9PJH8;E9PIG2;E9PRS3;E9PLA6;E9PQ34	0.98707	P28161;P28161-2;E9PHN6;F6XZQ7;E9PHN7;E9PLF1;H3BQT3;E9PGV1;B9ZVX7;P09488-2;P09488;E7EWW9;Q5T8Q9;P46439;Q5T8R1	0.92404	P27694;I3L4R8;I3L524;I3L2M5	0.97468	P56192;A6NC17;B3KVK7;H0YHV5;H0YIP0;H0YIC2;F8VPL7;F8VS26;H0YHL6;F8W0M7;F8W0S4;F8VZZ9;H0YI94;H0YI27;F5H2V6	0.99056
Q9Y295;H0YI06	1.1725	P63167;F8VXI7;F8VXL2;F8VRV5	0.99184	P50502;H7C3I1;Q8IZP2;F6VDH7;Q8NFI4;F8WAQ7	0.95159	P28331;P28331-2;P28331-4;P28331-5;B4DJ81;P28331-3;C9JPQ5;F8WDL5	1.1496	P27695;G3V3M6;G3V5Q1;G3V3C7;G3V5D9;G3V5M0;G3V359;H7C4A8;G3V3Y6;G3V574	0.97965	Q5VTU8;P56381	1.199
Q9Y2I6-2;Q9Y2I6	0.34434	Q5VTU3;P63172	0.92808	P50552	0.66702	P28838-2;P28838;H0Y9Q1;H0Y983	1.0129	P27797;K7EJB9;K7EL50	0.96352	P56385	0.90524
Q9Y2L1;G3V1J5;Q9Y2L1-2;F2Z2C0	1.7652	P63173;J3KT73;J3QL01;J3KSP2	1.0622	P50897;E9PP28;E9PK48;E9PMG2;E9PSE5;P50897-2	1.1578	P29144;Q5VZU9	0.99536	P28066;P28066-2	1.009	P56537;B7ZBH1;B7ZBG9;F8WD20;F8WDS6	0.96938
Q9Y2Q3-3;Q9Y2Q3;Q9Y2Q3-2;C9JNT3;Q9Y2Q3-4;E9PFN5	0.79925	Q8WVC2;P63220;Q9BYK1;Q9BYK2	1.1413	P50990;B4DEM7;B4DQH4;H7C4C8;H7C2U0	1.0057	P29373;Q5SYZ4	0.58486	P28070	1.0227	P56556	0.7556
Q9Y2S6	1.2081	P63244;J3KPE3;D6RAC2;H0Y8W2;D6REE5;H0YAF8;D6RHH4;D6R9Z1;H0YAM7;D6R9L0;D6RFX4;D6RAU2;E9PD14;D6RBD0;D6RFZ9;H0Y8R5;D6RF23;D6RGK8;D6R909;H0Y9P0;D6RHJ5;D6RDI0	1.0377	P50991;P50991-2;B7Z9L0;B7Z2F4	1.0035	P29401;P29401-2;B4E022;E9PFF2;F8W888;F8WAX4	1.0662	P28072;I3L3X7	0.94582	P57105	1.0841
Q9Y2W1	1.0247	P63261;I3L3I4;I3L3I0;I3L1U9;I3L4N8;K7EM38;I3L3R2;J3KT65;C9JUM1	1.0301	P51116	0.94064	P29692-3;E9PL71;E9PN91	0.91455	P28074;P28074-3;H0YJM8;P28074-2	0.97154	P57737-3;Q9Y3D7;I3L1U7;I3L0X9;I3L3T0;B3KSY4;P57737-2;P57737	0.81884
Q9Y2X3;H7BZ72	0.97795	P63313;CON__P21752	0.9516	P51148;P51148-2;K7ERI8;K7ERQ8;F8VWU4;F8VVZ0;F8VUA5;F8VVK3;K7ENY4;P61020-2;B4DJA5;P61020;P20339;F8WC93;F8WCY6;F8WD79;F8VPW9;F8VSF8;F8VWZ7	1.0573	P29966	0.94911	P28161;P28161-2;E9PHN6;F6XZQ7;E9PHN7;E9PLF1;H3BQT3;E9PGV1;B9ZVX7;Q4JNT8;P09488-2;Q03013-2;Q03013;P09488;E7EWW9	0.9967	P58107;E9PPU0	0.92813
Q9Y333	1.1424	P67775;P67775-2;P62714;H0YC23;H0YBN9;E5RFI3;E5RHP4;E7ESG8;E5RHC1;H3BV22;H3BTA2;P60510	1.1417	P51149;C9J592;C9J8S3;C9IZZ0;C9J4V0;C9J4S4;C9J7D1	1.0382	P30040;F8VY02;P30040-2;F8W1G0	0.84011	P28331-4;P28331-5;P28331;P28331-2;B4DJ81;P28331-3;C9JPQ5	1.0516	P58546;C9JL85	0.87175
Q9Y383;F8WB41;F8WEU3;B8ZZ10;A8MYV2;Q9NQ29-2;Q9NQ29-3;Q9NQ29;Q9Y383-3;Q9Y383-2;B7Z4Q3	2.1279	P67809;H0Y449;C9J5V9	1.0114	P51153;H0YLJ8;H0YL94;H0YMN7;H0YNE9;F5GY21;Q92930;P59190-2;P59190	0.9584	P30041	0.94695	P28482;A8CZ64	1.0115	P60174-1;P60174;P60174-4	1.0352
Q9Y3A5;F8WCV5;F8WE72	1.2253	P67870;Q5SRQ6;Q5SRQ3	1.0133	P51398-2;P51398-3;P51398	0.76212	P30042;H7C2G3;H7C1F6;H7C455;P30042-2;F2Z2Q0;H7BYH1	0.99511	P28838-2;P28838;H0Y9Q1;H0Y983	0.99932	P60228;E5RGA2;H0YBR5;E5RHS5;E5RIT4;E5RII3;H0YAW4;E5RIP5;E5RJ25;H0YBP5	0.96889
Q9Y3B4	NaN	P67936;P67936-2;K7ERG3;K7ENT6;K7EMU5;K7EPV9;K7EPB9	0.9791	P51532-5;P51532-2;P51532-3;P51532-4;P51532;Q9HBD4;K7EP28;H0YGM3;P51531-2;P51531	1.0452	P30043;M0R192;M0QZL1	0.83529	P29144;Q5VZU9	1.0399	P60468	1.118
Q9Y3D6	1.3366	P68133;P68032;P63267;P62736;Q5T8M8;A6NL76;Q5T8M7;P63267-2;F8WB63;B8ZZJ2;C9JFL5;F6UVQ4;F6QUT6	0.99588	P51571;H7C1C6;A6NLM8	0.9597	P30044-2;P30044;P30044-3;A6NC19	0.93337	P29373;Q5SYZ4	0.77222	P60602-2;P60602	1.0334
Q9Y3I0;E7EQS9	0.88468	P68104;Q5VTE0;A6PW80;Q5JR01	1.0107	P51572;P51572-2;C9JSP1;C9JQ75;C9J0M4;C9JMD7;C9JM14	1.0129	P30046;B7Z522;A6NHG4;B5MC82;J3KQ18;H7C342	0.94567	P29401;P29401-2;B4E022;E9PFF2;F8W888;F8WAX4	1.055	P60604-2;P60604	1.1581
Q9Y3U8;J3KTD3;J3QSB5	1.0844	P68371;M0R2D3;M0QY85;M0R0X0;M0QY37;M0QX14;M0QZL7;M0QYM7;M0R042;M0R2T4	0.98782	P51659;E7ER27;E7EWE5;P51659-3;P51659-2;G5E9S2;E7ET17;E7EPL9	0.99217	P30049	0.98294	P29966	0.87941	P60763;J3KSC4;J3QLK0	0.58912
Q9Y3Y2-4;Q9Y3Y2;Q9Y3Y2-3;Q5T7Y7	0.78169	P68402;P68402-3;P68402-2;P68402-4;J3KNE3	0.96764	P51665;H3BNT7;H3BTM8;B4DXI8;H3BQV2	1.0057	P30050;P30050-2	1.0042	P30040;F8VY02;P30040-2;F8W1G0	0.97038	P60842;J3KT12;P60842-2;J3QS69;J3KTB5;J3KSZ0;J3QL43;J3QR64;J3QLN6;J3KS25;J3KTN0;J3QKZ9;J3QL52;B4E102;J3KT04;J3KS93;J3QQP0	1.0589
Q9Y5A9-2;Q9Y5A9;F8W840;Q9BYJ9;Q7Z739	0.95229	P68431;K7EK07;Q16695;P84243;K7EMV3;B4DEB1;Q6NXT2;K7ES00;K7EP01	0.88796	P51688;I3L2I6;I3L4B7;I3L2L4;F5H6A3	1.167	P30084	1.0289	P30041	0.93559	P60866;P60866-2;E5RIP1;E5RJX2;G3XAN0	0.98283
Q9Y5B9;G3V5A4;G3V401;G3V2X0	0.95899	P78347-2;P78347-4;P78347-3;P78347;H7BYM4;G8JLD9;Q86UP8-3;Q86UP8;Q6EKJ0	1.2477	P51858;A8K8G0;P51858-2;Q5SZ07	1.0651	P30085;Q5T0D2;E9PGI8	0.99252	P30044-2;P30044;P30044-3;A6NC19	0.88817	P60891;B1ALA9;B4DNL6;P11908;P11908-2;P21108;B1ALA7;A6NMS2;H7C518;H7C540;D3YTJ7	0.95157
Q9Y5J1	0.85376	P78371;P78371-2;F5GWF6;F8VQ14	1.035	P51970;F5H7V7	0.94912	P30086	0.95626	P30046;B7Z522;A6NHG4;B5MC82;J3KQ18;H7C342	0.99354	P60903	0.96492
Q9Y5J7	1.0134	Q5TA02;P78417-3;P78417;Q5TA01;P78417-2	1	P51991;E7EWI9;P51991-2;H7C1J8	1.0475	P30153;F5H3X9;B3KQV6;C9J9C1;E9PH38;E9PPI5;E9PHZ6;E9PNM7	0.95117	P30049	1.0493	P60983;G3V4P8;M0QYG8;M0R1D2;M0R0C1;M0QYJ8;O60234	1.0029
Q9Y5K6	1.4075	P80723;P80723-2	0.73707	P52272-2;P52272;M0QZM1;M0R019;M0R2T0;M0R0N3;M0R2I7;M0QYQ7;M0QY96;M0QYL3;M0R0Y6	1.0402	P30405;H0Y548	NaN	P30050;P30050-2	0.96012	P61006;B4DEK7;H0YMN7;H0YNE9;F5GY21;Q92930;H0YLJ8;H0YL94;P59190-2;P59190	0.74795
Q9Y5L4;K7EIT2	0.99811	P82921	1.3064	P52292;J3QLL0;J3KS65;J3QL07	0.79695	P30419;P30419-2;B7Z8J4;K7EN82;K7EN42;B4DXS1;Q5VUC6;F5H594;O60551;Q5VUC7	0.99154	P30084	1.0524	P61011-2;P61011;G3V4F7;G3V480	0.79402
Q9Y5S9-2;Q9Y5S9	0.79913	P82933	1.6356	P52294;C9JYI4;C9J352;C9JWD9;F2Z3G4;C9J4U1	1.3401	P30520;G3V5D8;G3V232;Q8N142;Q8N142-2	0.99053	P30085;Q5T0D2;E9PGI8	1.0177	P61019-2;P61019;H7C125;E9PKL7;Q8WUD1;Q6PIK3	0.94651
Q9Y5Z4-2;Q9Y5Z4	0.85666	P84085;C9J1Z8;F5H1V1;F5H6T5;F8WCJ5;F8WDB3	1.286	P52597	1.0781	P30533	0.80863	P30086	0.93317	P61024;Q9BZU3;Q5T179	0.73441
Q9Y615	1.0601	P84090;G3V279	1.0012	P52758;E5RI71;H0YBX3;H0YB34	0.77995	P30566;E7ERF4;P30566-2	0.95424	P30153;F5H3X9;B3KQV6;C9J9C1;E9PH38;E9PPI5;E9PNM7;E9PHZ6	0.9443	P61026	0.80074
Q9Y617;Q9Y617-2	0.82132	P98179	1.1501	P52788;B4DE40;P52788-2;H7C2R7	1.0809	P30740	NaN	P30405;Q2YDB7;H0Y548	0.8406	P61081;M0QX69;M0QYI6	1.0353
Q9Y678;Q9UBF2;F6X838	0.92814	Q00059;A8MRB2;H7BYN3	0.89821	P52888;K7EP46;K7EIK4;K7EL32;B3KSE2;K7EL02;K7EKB6;K7EMU4	1.1824	P30825;Q5JR49	0.75629	P30419;P30419-2;B7Z8J4;K7EN82;K7EN42;B4DXS1;Q5VUC6;F5H594;O60551;Q5VUC7	0.9743	P61086;D6RDM7;B4DIZ2;P61086-2;P61086-3	0.83119
		Q00341-2;Q00341;H0Y394;H7C0A4;C9JT62;C9JHS7;C9JK79;C9JHZ8;C9JES8;C9JZI8;C9J5E5;C9JIZ1;H7C2D1	0.98405	P52907	1.0035	P30837	1.0461	P30519;I3L159;I3L1F5;I3L430;I3L276;I3L4P8;I3L463;I3L1Y2	0.8569	P61088;F8VQQ8;F8VSD4;F8VV71;Q5JXB2;F8VZ29	0.93276
		Q00610-2;Q00610;J3KS13;P53675-2;P53675;J3KR87;K7EJJ5;J3KSQ2;J3KRF5;J3QL20;F5H5N6	0.97415	P53004;C9J1E1	0.95242	P31150;G5E9U5	0.91863	P30520;G3V5D8;G3V232;Q8N142;Q8N142-2	1.0277	P61106	0.70292
		Q00688;G3V5F2	1.0064	P53007;B4DP62	0.98893	P31153;B4DN45;Q00266	0.93244	P30533	0.87484	P61158;B4DXW1;F5H3P5;F8WEW2;F8WE84	1.0441
		Q00796;H0YLA4;B7Z3A6;H0YKB3	0.91422	P53396-2;P53396;B4E3P0;K7ESG8;K7EIE7	0.9704	P31350;P31350-2;C9JXC1	0.59808	P30566;P30566-2;E7ERF4	0.95595	P61163;F5H3I4;B4DXP9	0.98484
		Q00839;Q00839-2;Q5RI18	1.0448	P53582;F5GXS7;H0YAI3;H0Y903;H0Y955	1.0843	P31689;B7Z5C0	1.0474	P30825;Q5JR49	0.91177	P61201;P61201-2;B4DIH5;H0YKU5;H0YM03	0.93655
		Q01081;Q01081-2;Q01081-4;Q8WU68-3;Q8WU68;M0QYK5;Q01081-3;M0R2N4;Q8WU68-2;K7EJH3;K7EJM7;K7ERY8;K7EPL9	1.0304	P53597	0.71585	P31930	1.0465	P30837	0.97457	P84077;P61204;B7ZB63;F5H423;F5H0C7;H0YGG7	0.85187
		Q01082;Q01082-3;Q01082-2;F8W6C1;P11277-3;P11277;P11277-2;O15020-2;O15020	1.0278	P53618;E9PP73;E9PP63;E9PKQ1	0.94784	P31937	1.0416	P31150;G5E9U5	0.94461	P61221;D6R9I9;D6RGF4;H0Y990	0.94923
		Q49AS9;Q01085;Q01085-2;F8WE16;E7ETJ9;C9JTN7;P31483-2;F8W8I6;P31483	1.2052	P53621;P53621-2	1.1519	P31939;E9PBU3;F5GWY2;H7C1S2;H7C084;C9JLK0;F8WEF0;H7BZU3	1.0024	P31153;B4DN45;Q00266	0.95847	P61224-3;P61224;P61224-2;P61224-4;F5H823;B7ZB78;F5GZG1;E7ESV4;F5H7Y6;A6NIZ1;F5H004;F5GX62;F5H4H0;F5GYH7;F5H077;F5GWU8;F5H491;F5H0B7;F5H500;F5H6R7;F5GYB5;F8WBC0	0.99554
		Q01105-3;Q5VXV2;Q01105-2;Q01105	0.94873	P53985;Q5T8R3;Q49A45;Q5T8R5	0.73052	P31942-3;P31942-2;P31942;P31942-4;B4DHY1;P31942-6;P31942-5	0.97029	P31350;P31350-2;C9JXC1	0.81529	P61247;D6RG13;D6RAT0;D6RB09;F5H4F9;E9PFI5;H0Y9Y4;H0Y8L7;D6R9B6;D6RAS7;D6RED7;D6RGE0;D6RI02	1.0492
		Q01469;I6L8B7;A8MUU1	1.077	P53999;D6RC37;D6R970	1.0307	P31946;Q4VY20;Q4VY19	0.99546	P31689;B7Z5C0	1.0432	P61289;P61289-2;B3KQ25;K7ESG5;K7ENH2;K7EMD0;K7EPX6;K7EKR3;B7Z8D3	1.021
		Q01518;Q01518-2;Q5T0R1;Q5T0R7;Q5T0R6;Q5T0R5;Q5T0R4;Q5T0R3;Q5T0R2;Q5T0R9;Q5T0S3;Q5T0R8	0.96519	P54136;P54136-2;F5H3T8;E5RJM9;E5RH09	1.0187	P31947-2;P31947	0.98608	P31930	1.0103	P61326;B1ARP8	0.97485
		Q01581	1.9067	P54577	0.88377	P31948;G3XAD8;F5H0T1;F5H783;F5GXD8;H0YGI8	0.97737	P31937;H7BZL2	1.0011	P61353;K7ELC7;K7EQQ9;K7ERY7	1.0084
		Q01780;B4DKG8;Q01780-2	1.2015	P54709;C9JA36;B7Z1N7;C9JXZ1;H7C4L9;H7C547;F8WBY4	0.97906	P31949	0.93219	P31939;E9PBU3;F5GWY2;H7C1S2;H7C084;C9JLK0;F8WEF0;H7BZU3	0.99469	P61586;C9JNR4;C9JX21;Q5JR08;P08134;E9PN11;Q5JR07;E9PQH6;Q5JR05;C9J1T2;C9JRM1;E9PLA2;Q5JR06	1.0171
		Q01813;Q01813-2;Q5VSR5;B1APP6;Q5VSR6;H0Y3Y3;B1APP8;H0Y757	0.99551	P54727;P54727-2;Q5W0S5;Q5W0S4;H0Y579	0.95436	P32119;A6NIW5;P32119-2	0.96872	P31942;P31942-3;P31942-2;P31942-4;B4DHY1;P31942-5;P31942-6	0.97262	P61604;B8ZZL8;B8ZZ54	1.0412
		Q02539	0.47007	P54886-2;P54886	1.0286	P32969;D6RAN4;H0Y9V9;E7ESE0;H0Y9R4	1.1256	P31946;Q4VY20;Q4VY19	1.0203	P61758;F5H2A7	1.0315
		Q02750-2;Q02750;G5E9C7;P36507	0.93053	P55010;H0YLZ1;H0YN40;H0YK11;H0YMJ8;H0YM54;H0YK29	0.87777	P33176;E9PET8;J3KNA1;O60282;Q12840;O60282-2	0.95231	P31946-2	1.0144	P61927;D6R9X9;D6RG19	1.0166
		Q02790;F5H1U3;H0YFG2;F5H120	1.0277	P55036;Q5VWC4;H0Y3Y9;A6PVX3;P55036-2;H0Y561	0.95368	P33316-2;H0YNW5;H0YKC5;P33316;H0YNJ9;H0YMM5;H0YKI0;H0Y477;H0YMP1	0.94947	P31947-2;P31947	1.0307	P61960;H0Y614;P61960-2	0.98189
		Q02878;F8W181;F8VZ45;F8VR69;F8VZA3;F8VWR1;F8VRY1	1.124	P55060-3;P55060;F8W904;B4DUC5;P55060-2	0.95656	P33552	NaN	P31948;G3XAD8;F5H0T1;F5H783;F5GXD8;H0YGI8	0.98594	P61964	0.69266
		Q02952-3;Q02952-2;Q02952	0.83014	P55072;C9JUP7;C9IZA5	0.94711	P33992;B1AHB1;B1AHB2;B1AHA9	1.0285	P31949	0.92344	P61978;P61978-2;Q5T6W1	0.83155
		Q04760;Q04760-2	0.98378	P55145;H7C2D6	1.0061	P33993;P33993-3;P33993-2;C9J8M6	0.98384	P32119;A6NIW5;P32119-2	0.95708	Q5T6W5;P61978-3;Q5T6W2	1.0079
		Q04837;E7EUY5;C9K0U8	0.96647	P55735;A8MXL6;P55735-2;B4DXJ1;E7ERC8	1.0157	P34897-3;P34897;P34897-2;B4DLV4;H0YIZ0;G3V2Y4;G3V5L0;G3V4W5;G3V540;G3V2W0;G3V241;G3V3Y8;G3V4T0;G3V4X0;G3V2E4;G3V2D2;G3V2Y1;G3V3C6	1.0014	P32969;D6RAN4;H0Y9V9;E7ESE0;H0Y9R4	1.1347	P61981	0.91304
		Q04917;A2IDB2;F8WEB6;A2IDB1	1.0296	P55795	1.1331	P34932	0.99555	P33176;E9PET8;J3KNA1;Q12840;O60282-2	0.96503	P62081;B5MCP9	1.0281
		Q05048;A3KFI9	1.3904	P55884;P55884-2;C9JZG1;C9JQN7	1.0412	P34949;H3BPB8;H3BMZ9;H3BPP3;H3BP57;H3BUZ9;F5GX71;H3BT48;P34949-2;H3BPU7;H3BUG1;H3BU66;H3BPM5;H3BN01;H3BQX0;H3BNY8;H3BT46;B4DYB8	0.94142	P33993;P33993-3;P33993-2;C9J8M6	0.97556	P62136;P62136-2;A6NNR3;F8W0W8;E9PMD7;E7ETD8;C9J9S3;C9JP48;H0Y3Y6;B4DNE3;F5H1L6;F5H037;F8W0V8;F8WE71	1.0053
		Q5T760;Q05519-2;Q05519;B4DWT1;B4DTC1;Q5T757	1.0168	P55957-3;P55957;P55957-2	1.0096	P35232;C9JW96;C9JZ20;E7ESE2;E9PCW0;B4DY47;D6RBK0	0.98417	P34897-3;P34897;P34897-2;B4DLV4;H0YIZ0;G3V5L0;G3V2Y4;G3V4W5;G3V540;G3V2W0;G3V241;G3V3Y8;G3V4T0;G3V4X0;G3V2E4;G3V2D2;G3V2Y1;G3V3C6	0.98035	P62191;B4DR63;G3V4X1	0.79904
		Q05639	0.91573	P56182;D6RE82	0.88619	P35237;H0Y3G3;C9JTJ8;C9JVA8	0.9776	P34932	0.99503	P62195;P62195-2;J3QQM1;J3QSA9;J3KRP2;J3QLH6;J3QRW1;J3QSE0;J3QRR3;J3KTQ9;Q8NB90-3;Q8NB90-2;Q8NB90	0.87511
		Q06124-3;Q06124-2;Q06124	0.9313	P56192;B3KVK7;A6NC17;H0YHV5;H0YIC2;F8VPL7;F8VS26;F8W0M7;F8W0S4;F8VZZ9;F5H2V6;H0YIP0	0.89487	P35244;B5MC59	1.0233	P34949;P34949-2;H3BPB8;H3BMZ9;H3BPP3;H3BP57;H3BUZ9;F5GX71;H3BT48;H3BPU7;H3BUG1;H3BU66;H3BPM5;H3BN01;H3BQX0;H3BNY8;H3BT46;B4DYB8	0.89995	P62241;Q5JR95	1.0878
		Q06203;D6RE15;D6RCC8	1.1366	P56270-2;I3L2Z5;C6G496;P56270;I3L0M3;H3BQI4;I3L411;H3BPU3;I3L4Y2;H3BQS2;H3BQD6;I3L0V8;J3QSH4;Q14119;Q9HBE1-4;Q9HBE1-2;Q9HBE1-3;Q9HBE1	0.92968	P35250-2;P35250	1.0881	P35232;C9JW96;C9JZ20;E7ESE2;E9PCW0;B4DY47;D6RBK0	1.0169	P62244;I3L3P7;I3L246;H3BV27;H3BT37;I3L303;H3BVC7	1.1454
		Q06210-2;Q06210;E5RJP4;O94808	1.3975	Q5VTU8;P56381	1.1071	P35251-2;P35251;H0Y8U4	0.62955	P35237;H0Y3G3	0.95987	P62258;P62258-2;B4DJF2;I3L3T1;K7EM20;K7EIT4;I3L0W5	0.99785
		Q06830	0.9445	P56385	0.9465	P35268;K7ELC4;K7EMH1;K7ERI7;K7EP65;K7EKS7;K7EJT5;C9JYQ9;Q6P5R6;H0Y8C2	0.99487	P35244;B5MC59	1.1074	P62263;H0YB22;E5RH77	0.93772
		Q07021;I3L3Q7;I3L3B0	1.0175	P56537;B7ZBH1;B7ZBG9;F8WD20;F8WDS6	0.93672	P35270	1.0159	P35250-2;P35250;H7C5S7;H7C5P1;H7C5Q7;F8WC37;H7C5A0;H7C5G4;H7C5P4	0.73071	P62266;D6RD47;D6RDJ2;D6RIX0;D6R9I7	1.0949
		Q07065	0.98385	P57105	1.2752	P35520;P35520-2;F5H2U1;C9JMA6;H7C2H4	1.0254	P35251-2;P35251;H0Y8U4	0.82179	P62269;J3JS69	1.0973
		Q07666-2;Q07666;Q07666-3	1.0127	P57737-3;B3KSY4;P57737-2;P57737;Q9Y3D7;I3L1U7;I3L0X9;I3L3T0;I3L212;E7EP81;I3L167	0.80924	P35573;P35573-2;P35573-3	1.0146	P35268;K7ELC4;K7EMH1;K7ERI7;K7EP65;K7EKS7;K7EJT5;C9JYQ9;Q6P5R6;H0Y8C2	1.0249	P62273;P62273-2	1.1271
		Q07812-5;Q07812-8;Q07812;Q07812-2;Q07812-7;Q07812-4	0.71113	P57740;G3V1T4;Q6PJE1;B4DZ67	1.1477	P35579;P35579-2;Q5BKV1;B1AH99;REV__E7EQT4;REV__Q9UKV3-5;REV__Q9UKV3	1.0286	P35270	0.84826	P62277;J3KMX5;E9PS50	1.0796
		Q07960	NaN	P58107;E9PPU0	0.93627	P35637-2;P35637;H3BPE7	0.94515	P35520;P35520-2;F5H2U1;C9JMA6;H7C2H4	1.0041	P62280;M0QZC5;M0R1H5;M0R1H6	1.0372
		Q08211;Q08211-2	1.0373	P58546;C9JL85	1.1113	P35659;P35659-2;B4DFG0;D6RDA2;D6R9L5;H0Y993;H0Y8X0	0.92609	P35573;P35573-2;P35573-3	1.0884	P62304;A6NHK2	1.0713
		Q08257-2;Q08257-3;Q08257	NaN	P60059	1.2234	P35998;B7Z5E2;C9JLS9	0.90331	P35579;P35579-2;Q5BKV1;B1AH99;REV__E7EQT4;REV__Q9UKV3-5;REV__Q9UKV3	1.0137	P62306;F8W0W6	1.0334
		Q08380	1.5714	P60174-1;P60174;P60174-4	1.0076	P36404	1.0288	P35637-2;P35637;H3BPE7	0.93227	P62310	0.99857
		Q08752	0.74247	P60228;E5RGA2;H0YBR5;E5RIT4;E5RHS5;H0YAW4;H0YBP5;E5RII3	1.0252	P36405	1.0793	P35658-2;P35658-4;P35658;P35658-3;P35658-5	1.1916	P62312	1.1091
		Q08945;E9PPZ7;E9PMD4	1.0197	P60602-2;P60602	1.0884	P36507;G5E9C7	0.97831	P35659;P35659-2;B4DFG0;D6RDA2;D6R9L5;H0Y8X0;H0Y993	0.97798	P62316;P62316-2;K7EJB5;K7ERG4	0.87809
		Q08J23-2;Q08J23;G3V1R4;D6RAS3	0.94896	P60604-2;P60604	0.77819	P36542;B4DL14;P36542-2	1.0202	P35749-4;P35749-3;P35749;P35749-2;Q7Z406;Q7Z406-6;F2Z2U8;Q7Z406-2;G8JLL9;Q7Z406-5;Q7Z406-4;M0QY43	0.9049	Q5T4B6;P62328	0.78263
		Q09028-3;Q09028;Q09028-2;Q09028-4;H0YF10;H0YCT5;H0YDK2;H0YEU5;B4DRT0;Q5JP02;E9PNS2;E9PIC4;E9PNS6;C9JAJ9;C9J959	0.89403	P60842;J3KT12;P60842-2;J3QS69;J3KTB5;J3KSZ0;J3QL43;J3KTN0;J3QR64;J3QLN6;J3KS25;J3QKZ9;J3QL52;B4E102;J3KT04;J3KS93;J3QQP0	1.0415	P36543-2;P36543;P36543-3;C9J8H1	1.1439	P35998;B7Z5E2;C9JLS9	0.87054	P62333;H0YJC0;H0YJS8;H0YJX2;H0YJE9;H0YJT1	0.97773
		Q09161	0.54943	P60866;P60866-2;E5RIP1;E5RJX2;G3XAN0	1.0042	P36551;H0YA22;D6RER6	0.92434	P36404	1.0764	P62424;Q5T8U2;Q5T8U3	0.89682
		Q09472	0.98022	P60891;B1ALA9;B4DNL6;P11908;P11908-2;P21108;H7C518;B1ALA7;H7C540;A6NMS2;D3YTJ7	1.0418	P36578;H3BM89;H3BTP7;H3BU31	1.1517	P36405	0.97333	P62495;Q96CG1;B7Z7P8;D6RCB3;I3L492;D6RJE8	1.0265
		Q10713;B4DKL3;Q5SXN9;Q5SXN0	1.0953	P60903	1.0208	P36639-4;P36639-3;P36639-2;P36639	1.4589	P36542;B4DL14;P36542-2	1.0382	P62633-2;P62633-5;P62633;P62633-4;P62633-6;B4DP17;P62633-3;D6RAT4	1.0284
		Q12788;J3KNP2	0.78134	P61006;B4DEK7	0.88666	P36871;P36871-3;P36871-2	0.88079	P36543-2;P36543;P36543-3;C9J8H1	0.78676	P62701;A6NH36;Q8TD47;C9JEH7;P22090;C9JQ55	1.0116
		Q12874;E7EUT8	1.0234	P61009	0.63301	P36954;K7EKS1	0.80806	P36551;H0YA22;D6RER6	0.97923	P62750;H7BY10;K7EJV9;K7ERT8;A8MUS3;K7EMA7	1.0197
		Q12904;Q12904-2;D6R937	1.1878	P61011-2;P61011;G3V4F7;G3V480	0.95173	P36957;B7Z5W8;Q86SW4;H0YJF9;G3V5M3;G3V3F0	0.90858	P36578;H3BM89;H3BTP7;H3BU31	1.1316	P62753;A2A3R5;A2A3R7	1.0311
		Q12905	0.90976	P61019-2;P61019;H7C125;E9PKL7;Q8WUD1;Q6PIK3	0.90684	P37108;H0YLA2	0.9809	P36639-4;P36639-3;P36639-2;P36639	1.1513	P62805	1.0151
		Q12962	0.47595	Q5T179;P61024;Q9BZU3	0.89895	P37198;M0QXN5	1.1126	P36871;P36871-2;P36871-3	0.92878	P62820;B7Z8M7;E7END7;P62820-2;P62820-3;E7ETK2	1.3563
		Q12996	0.8111	P61026	0.94834	P37802;C9J5W6;Q9UI15	1.0018	P36954;K7EKS1	1.002	P62829;C9JD32;J3KT29;B9ZVP7;J3KTJ3;J3QQT9	0.93331
		Q13011;M0R248;M0QZW4	1.1645	P61081;M0QX69;M0QYI6	0.93236	P37837;F2Z393;E9PM01;E9PKI8	0.97907	P36957;B7Z5W8;Q86SW4;H0YJF9;G3V5M3;G3V3F0	0.92931	P62834	1.3413
		Q13015	8.0017	P61086;D6RDM7;B4DIZ2;P61086-2;P61086-3	0.90819	P38117;P38117-2;M0QY67	0.9833	P37108;H0YLA2	0.97128	P62851	1.0446
		Q13112	0.9026	P61088;F8VQQ8;F8VSD4;F8VV71;Q5JXB2;F8VZ29	0.91349	P38159;P38159-2;H0Y6E7;H3BT71;Q96E39;B3KRG5;H3BUY5;H3BR27;P38159-3;H3BNC1;O75526;Q8N7X1	1.048	P37198	1.1075	P62854;Q5JNZ5	1.0588
		Q13123;D6REL4;E7EQZ7	1.0126	P61106	0.85804	P38646;D6RJI2;H0YBG6;D6RA73;H0Y8S0	1.0022	P37802;C9J5W6;Q9UI15	0.99492	P62857	1.0753
		Q13148;Q13148-2;B1AKP7;G3V162;K7EJM5;K7EN94;Q13148-3;K7EJ99;B4DJ45;K7EL26	1.105	P61158;B4DXW1;F5H3P5;F8WEW2;F8WE84	1.0653	P38919;I3L3F6;I3L2Z3;I3L3H2;I3L2M0	0.98488	P37837;F2Z393;E9PM01;E9PKI8	0.99111	P62873;B1AKQ8;F6UT28;F6X3N5;B3KVK2	1.0975
		Q13151	1.0237	P61160;P61160-2	0.93199	P39019;M0R2L9;M0QXK4;M0QYF7;M0R140	0.9999	P38117;P38117-2;M0QY67	0.94632	P62877	0.8765
		Q13155;A8MU58;F8W950	1.0345	P61163;F5H3I4;B4DXP9	0.90993	P39023;G5E9G0;B5MCW2;H7C422;H7C3M2;F8WCR1;Q92901	1.0393	P38159;P38159-2;H3BT71;H0Y6E7;Q96E39;B3KRG5;H3BUY5;H3BR27;P38159-3;H3BNC1;O75526;Q8N7X1	1.0252	P62879;E7EP32;C9JIS1;C9JXA5;C9JZN1;B3KPU1;Q9HAV0;C9JD14;F5H100;F5H8J8;F5H0S8;E9PCP0;P16520;H7C5J5	0.95757
		Q13162;H7C3T4;A6NJJ0;A6NG45	0.8653	P61201;P61201-2;B4DIH5;H0YKU5;H0YM03	0.97919	P39656;E7EWT1	1.044	P38646;D6RJI2;D6RA73;H0Y8S0;H0YBG6	1.0109	Q59GN2;P62891	1.0861
		Q13177;H7C1X3;O75914-2;O75914;O75914-4;O75914-3;B1AKS5;H0YCG5;E9PM17;B3KNX7;Q13153;Q13153-2	1.2225	P84077;P61204;B7ZB63;F5H423;F5H0C7;H0YGG7	0.90843	P39687;H0YN26;O95626;O43423;H7BZ09	0.97454	P38919;I3L3F6;I3L2Z3;I3L3H2;I3L2M0;E9PBH4	1.0254	P62899;H7C2W9;C9JU56;B7Z4E3;P62899-3;P62899-2;B7Z4C8;B8ZZK4	1.0251
		Q13185;C9JMM0;B8ZZ43	0.98167	P61221;D6R9I9;D6RGF4;H0Y990	0.99586	P39748;I3L3E9;F5H1Y3	0.95703	P39019;M0R2L9;M0QXK4;M0QYF7;M0R140	1.0208	P62906	1.2705
		Q13200;E7EW34;E9PCS3;H7C1H2;H7C2Q3;C9JPC0;F8WBS8	1.0281	P61224-2;P61224-3;P61224;E7ESV4;F5H7Y6;A6NIZ1;F5H4H0;F5GYH7;F5H077;F5GWU8;F5H491;F5H0B7;F5H500;F5H6R7;F5H004;F5GYB5;F5GX62;P61224-4;F5H823;B7ZB78;F5GZG1;F8WBC0	1.0043	P40222	1.0629	P39023;G5E9G0;H7C422;B5MCW2;H7C3M2;F8WCR1;Q92901	1.0351	P62913	1.0048
		Q13232;H3BPR2	1.0076	P61247;D6RG13;D6RAT0;H0Y9Y4;F5H4F9;D6RB09;E9PFI5;H0Y8L7;D6R9B6;D6RAS7;D6RED7;D6RI02;D6RGE0	1.0893	P40227;B4DPJ8;P40227-2;Q92526;Q92526-2;B4DX20;J3KRI6	0.99617	P39656;E7EWT1	1.024	P62913-2;Q5VVC8;Q5VVC9	0.66566
		Q13242;H0YIB4	1.0273	P61254;J3QRI7;J3QQQ9;J3QQV1;J3KTJ8;J3QRC4;J3KSS0;J3KS10	0.95128	P40429;M0QYS1;Q6NVV1;M0QZU1	1.3257	P39748;I3L3E9;F5H1Y3	1.0283	P62917;E9PIZ3;E9PKZ0;E9PKU4;G3V1A1;E9PP36	0.89115
		Q13247-3;Q13247;Q08170;B4DJK0;Q13247-2;B4DUA4;F6T1J1	1.1673	P61289;P61289-2;B3KQ25;K7ESG5;K7ENH2;K7EMD0;K7EPX6;K7EKR3;B7Z8D3	0.95353	P40925-2;P40925;P40925-3;B9A041;B8ZZ51;C9JF79;C9JRL4	0.98985	P40222	1.0528	P62937;F8WE65;C9J5S7;Q567Q0;Q9Y536;F5H284;E5RIZ5;A2BFH1	1.0417
		Q13263;Q13263-2;M0R0K9;M0R2I3;M0R3C0	0.98966	P61313;E7EQV9;E7ENU7;E7EX53;P61313-2;E7ERA2	1.9583	P40926;E9PDB2;G3XAL0	0.9361	P40227;B4DPJ8;P40227-2;Q92526;Q92526-2;B4DX20;J3KRI6	0.99534	P62942;Q5W0X3;Q1JUQ5	0.95593
		Q13283;E5RIZ6;E5RI46;E5RIF8;E5RH42;Q5HYE9;E5RJU8;F5H4D6;E5RH00	1.0173	P61353;K7ELC7;K7EQQ9;K7ERY7	1.0435	P40937;P40937-2;F5H304;F5H5S0;C9JH72;F5H0U6;F8W9B4;E9PEP3	1.0232	P40429;M0QYS1;Q6NVV1;M0QZU1	1.2522	P62979;J3QS39;J3QTR3;F5H6Q2;P62987;F5GYU3;F5H2Z3;F5H265;F5H7Y5;B4DV12;F5H388;F5H747;F5GXK7;J3QKN0;P0CG47;Q96C32;F5H7K6;F5H041;P0CG48;M0R1V7;F5H4D8;M0R1M6;M0R2S1;J3QLP7;J3QRK5;J3QSA3;K7EMA8;F5GZ39;J3KSM4	0.92037
		Q13310-2;Q13310-3;B1ANR0;Q13310;H0Y5F5;H0YEU6;B1ANR1;H0Y6X6;H0YCC8;H0YEQ8;H0YER0	0.99405	P61586;Q5JR08;P08134;E9PN11;Q5JR07;C9JNR4;E9PQH6;C9JX21;Q5JR05;E9PLA2;C9J1T2;C9JRM1;Q5JR06	0.96664	P40938-2;P40938	1.111	P40925-2;P40925;P40925-3;B9A041;B8ZZ51;C9JF79;C9JRL4	0.97482	P62993;P62993-2;J3KT38;J3QRL5	0.96259
		Q13347;Q5TFK1	0.91821	P61604;B8ZZL8;B8ZZ54	1.0025	P40939;H0YFD6;B4DYP2	0.96847	P40926;E9PDB2;G3XAL0	0.94332	P62995-3;P62995;H7BXF3;H7C2L4	0.9842
		Q13415	1.0931	P61758;F5H2A7	1.0759	P41091;Q2VIR3;Q2VIR3-2;F8W810;H7BZU1	0.96492	P40937-2;P40937;F5H304;C9JH72;F5H0U6;F5H5S0;F8W9B4	1.0343	P63000;P63000-2;B1AH77;B1AH78;B1AH80;P15153	0.87206
		Q13425-2;Q13425	0.95327	P61962;E9PCY4;B4E039	1.1673	P41208;Q12798	0.77151	P40938-2;P40938	1.0666	P63104;E7EX29;B0AZS6;E7ESK7;E7EX24;B7Z2E6;H0YB80;E5RGE1;E5RIR4;E9PD24;E7EVZ2	0.98403
		Q13442;F8WBW6	0.85545	P61964	0.86515	P41223;C9JNV2;C9JCD9;F8WCN7	0.88335	P40939;B4DYP2;H0YFD6	0.97708	P63151;P63151-2;E5RIY1;E5RFR9;Q66LE6;Q9Y2T4-3;Q00005-6;Q9Y2T4-4;Q00005;Q00005-2;Q9Y2T4-2;Q9Y2T4;Q00005-3;Q00005-4;Q00005-5;Q00005-7	0.90398
		Q13501-2;Q13501;C9JRJ8;E9PFW8;E3W990;E7EMC7	0.96108	P61970;H3BRV9;J3QS01	0.98676	P41227-2;P41227;C9JN83;F8W808;A8MWP7;C9JW55;Q9BSU3	0.98094	P41091;Q2VIR3;Q2VIR3-2;F8W810;H7BZU1	0.93365	P63167;F8VXL2;F8VRV5;F8VXI7	0.95353
		Q13526;K7EN45;O15428;K7EMU7	1.0139	P61978;P61978-2;Q5T6W1	0.99342	P41240;H3BUM9;H3BU69;K7ENL8;K7ES68;P42679-3;K7EQY5;P42679;P42679-2	0.93073	P41208	0.83371	Q5VTU3;P63172	0.87813
		Q13541	0.89042	Q5T6W5;P61978-3;Q5T6W2	2.3688	P41250	0.94731	P41227-2;P41227;F8W808;A8MWP7;C9JN83;C9JW55;Q9BSU3;H0Y8T0	0.93214	P63173;J3KT73;J3QL01;J3KSP2	1.0763
		Q13547;Q5TEE2;F5GXM1	0.89236	P61981	0.95369	P41252;J3KR24;Q5TCC4;Q5TCD1;Q5TCC5;Q5TCD2	0.96033	P41240;H3BUM9;H3BU69;K7ENL8;K7ES68;P42679-3;K7EQY5;P42679;P42679-2	0.90644	Q8WVC2;P63220;Q9BYK1;Q9BYK2	1.0789
		Q13616	1.4079	P62081;B5MCP9	1.0114	P42025;G5E9Q5	1.7422	P41250	0.9337	P63244;J3KPE3;D6RAC2;H0Y8W2;H0YAF8;D6RHH4;D6REE5;H0YAM7;D6R9Z1;D6R9L0;D6RFX4;D6RAU2;E9PD14;D6RBD0;D6RFZ9;D6RF23;H0Y8R5;D6RGK8;H0Y9P0;D6RHJ5;D6R909;D6RDI0	1.0853
		Q5T2B4;Q5T2B7;Q5T2B5;Q13617;Q13617-2	0.83051	P62136;P62136-2;A6NNR3;P62140;E7ETD8;E9PMD7;C9JP48;C9J9S3;H0Y3Y6;B4DNE3;F8W0V8;F8WE71;F5H1L6;F5H037	0.99227	P42166;A2T926	1.0095	P41252;J3KR24;Q5TCC4;Q5TCD1;Q5TCC5;Q5TCD2;Q5TCC9;Q5TCC6	0.95695	P63261;I3L3I4;I3L3I0;I3L1U9;I3L4N8;K7EM38;I3L3R2;J3KT65	1.077
		Q13642-1;Q13642-5;Q13642-4;Q5JXI8;Q13642;Q13642-3;Q5JXH8;Q5JXH7;Q5JXI3;Q5JXI2;Q5JXI0;Q5JXH9	1.0444	P62191;B4DR63;G3V4X1	0.90321	P42677;Q5T4L4;C9J1C5	1.087	P42025;G5E9Q5	1.6716	P67775;P62714;H0YC23;P67775-2;E5RHC1;H0YBN9;E5RFI3;E5RHP4;E7ESG8;H3BV22;H3BTA2;P60510	0.93855
		Q13813-3;Q13813;Q13813-2;A6NG51	1.0709	P62195;P62195-2;J3QQM1;J3QSA9;J3KRP2;J3QLH6;J3QRW1;J3QSE0;J3QRR3;J3KTQ9;Q8NB90-3;Q8NB90-2;Q8NB90	0.97912	P42704;B8ZZ38;C9JCA9;H7C3W8	1.0921	P42166	1.0589	P67809;H0Y449;C9J5V9	1.0275
		Q13895;F8WBL2;H7BY94	1.7423	P62241;Q5JR95	1.0837	P42765;K7EME0;K7ER88;K7EJB1;K7EJ68	0.93718	P42574;C9JXR7;A8MVM1	0.95557	P67870;Q5SRQ6;Q5SRQ3	0.96687
		Q14008-2;Q14008;Q14008-3;H0YDX5;E9PQH5	0.92336	P62244;I3L3P7;I3L246;H3BV27;H3BT37;I3L303;H3BVC7	1.0567	P42766;H0Y3A0;F2Z388	0.97058	P42677;Q5T4L4;C9J1C5	1.1216	P67936;P67936-2;K7EPB9;K7EMU5	0.80421
		Q14011;K7EQX4;K7ENN6;K7EIF7;K7ELV6;K7EQL0;K7ENX8;K7EJV5;K7ELT6;K7EMY9;K7EPM4;K7ER40;K7EQR7;B4E2X2;D6W5Y5	1.0046	P62258;P62258-2;B4DJF2;I3L3T1;K7EIT4;K7EM20;I3L0W5	1.0001	P43034;I3L2U8;B4DF38;I3L3N5;P43034-2;I3L495	0.99828	P42704;B8ZZ38;C9JCA9;H7C3W8	1.0499	P68133;P68032;P63267;P62736;Q5T8M8;A6NL76;F8WB63;B8ZZJ2;C9JFL5;F6UVQ4;F6QUT6	0.96791
		Q14103-3;Q14103;H0Y8G5;H0YA96;Q14103-4;B4DTC3;Q14103-2;D6RAF8;D6RF44;D6RBQ9;D6RD83;F5H6R6	1.0698	P62263;H0YB22;E5RH77	0.98642	P43304;F8W6E4;P43304-2;F5GYK7;E9PDK4;E7EM56	1.095	P42765;K7EME0	1.0118	P68104;Q5VTE0;A6PW80;Q5JR01	1.0948
		Q14108-2;Q14108	0.61855	P62266;D6RD47	1.0062	P43487;C9JXG8;C9JJ34;C9JGV6;H7C137;C9JDM3;C9JIC6;B3KUP2	0.94281	P42766;H0Y3A0;F2Z388	0.97902	P68371;M0R2D3;M0QYM7;M0R042;M0R2T4	1.0372
		Q96Q25;Q14137;E9PIF8	1.1946	P62269;J3JS69	1.0957	P43490;Q5SYT8;F5H246;C9JF35;C9JG65	0.95505	P43034;I3L2U8;B4DF38;I3L3N5;I3L495;P43034-2	1.0439	P68402;J3KNE3;P68402-3;P68402-2;P68402-4	0.95814
		Q14152;F5H335	1.0262	P62273;P62273-2	1.0733	P43686;P43686-2	0.97627	P43246;E9PHA6;P43246-2;C9J809	1.0183	Q5VU11;P78346;P78346-2	0.86702
		Q14166	1.0755	P62277;J3KMX5;E9PS50	1.0694	P45880;P45880-2;P45880-1;Q5JSD2;Q5JSD1;B4DKM5;A2A3S1	1.0809	P43487;C9JXG8;C9JJ34;C9JGV6;H7C137;C9JDM3;C9JIC6;B3KUP2	0.94519	P78347-2;P78347-4;P78347-3;P78347;Q86U51	0.9032
		Q14195;Q14195-2;F5GWI3;H0YBT4;Q14117;E9PD68;Q14194;Q14194-2	1.1928	P62280;M0QZC5;M0R1H6;M0R1H5	1.0161	P45974-2;P45974;H7C5J3;Q92995-2;Q92995	0.88107	P43490;Q5SYT8;F5H246;C9JF35;C9JG65	1.0013	P78371;P78371-2;F5GWF6;F8VQ14	0.98862
		Q14204;H0YJ21	0.85562	P62304;A6NHK2	1.0488	P46013-2;P46013	0.46513	P43686;P43686-2	0.89726	P78417;Q5TA02;P78417-3;P78417-2;Q5TA01	0.98259
		Q14232;J3KMX9;F5H0D0;B4DGX0	0.89243	P62306;F8W0W6	0.95523	P46060;F8W7I9;H0Y4Q3;B0QYT6;B0QYT5;B0QYT4	1.0381	P45880;P45880-2;P45880-1;Q5JSD2;Q5JSD1;B4DKM5;A2A3S1	1.0801	P78527;E7EUY0;P78527-2;H0YG84	1.0106
		Q14240;Q14240-2;E7EQG2;Q9NZE6;J3KT04;J3KS93;E7EMV8	1.1547	P62310	0.89282	P46063;F5H2L2;F8WA66;F8WD97;F5H4P4;F5H3W0	1.058	P45974-2;P45974;H7C5J3;Q92995-2;Q92995	0.96703	P80723;P80723-2	0.61585
		Q14247-3;Q14247;Q14247-2;H7C314;B4E358;E9PKG3;E9PP90;H0YEV2;H0YCD9	1.1455	P62312	1.0189	P46087-2;P46087;P46087-4;P46087-3;F5GYR3;F5H5X6;F5H359;F5H8G6;F5GWB7;F5H709	0.84369	P46013-2;P46013	0.56506	P82921	0.97618
		Q14315-2;Q14315	0.97803	P62314;J3QLR7;J3QLI9	1.6997	P46108;P46108-2;I3L297	1.0237	P46060;F8W7I9;H0Y4Q3;B0QYT6;B0QYT5;B0QYT4	1.0912	P82933	0.7817
		Q14320;B0S8I6;Q9Y247	1.1201	P62316;P62316-2;K7ERG4;K7EJB5	1.0127	P46109	0.89604	P46063;F5H2L2;F8WA66;F8WD97;F5H4P4;F5H3W0	1.0262	P82979;F8VZQ9;H0YHG0;Q567R9;F8VS12	0.81627
		Q14444-2;Q14444;G3V153;E9PP31;E9PLA9	1.1195	P62328;Q5T4B6	1.0568	P46777;Q5T7N0	1.1396	P46087-2;P46087;P46087-4;P46087-3;F5H5X6;F5H359;F5H8G6;F5GWB7;F5H709;F5GYR3	0.88029	P84085;C9J1Z8	1.4764
		Q14566	1.0336	P62333;H0YJC0;H0YJS8;H0YJE9;H0YJT1;H0YJD2;H0YJY8;H0YJX2	1.0535	P46778;G3V1B3;M0R181;M0R3I5	1.0338	P46109	0.9194	P84090;G3V279	1.022
		Q14677-2;Q14677;Q14677-3;H0YD52	0.91	P62424;Q5T8U2;Q5T8U3	0.94942	P46781;B5MCT8;C9JM19;F2Z3C0;A8MXK4	1.716	P46776;E9PLL6;E9PJD9;E9PLX7;E9PKT2;H0YF34	1.0379	P84157-2;P84157-3;P84157	0.57539
		Q14683;G8JLG1;H0Y7K8	0.98487	P62495;Q96CG1;B7Z7P8;D6RCB3;D6RJE8;I3L492	0.975	P46783;F6U211;Q9NQ39	0.99948	P46777;Q5T7N0	1.1187	P98161-2;P98161-3;P98161;F5GXP2;Q6ZNL0-2;H3BV77;Q6ZNL0;H3BTE0	0.66083
		Q14684-2;Q14684	0.61601	P62633-2;P62633;B4DP17;P62633-3;P62633-5;P62633-4;P62633-6	0.9979	P46821	NaN	P46778;G3V1B3;M0R181;M0R3I5	1.0465	P98179	1.0875
		Q14697;Q14697-2;F5H6X6;E9PKU7;E9PNH1;H0YFL4;E9PRF8;Q14697-3	1.0418	P62701;A6NH36;C9JEH7;P22090;Q8TD47;C9JQ55	1.0124	P46940;H0YLE8;E9PDT6;Q13576-2;J3KR91;F5H7S7;E7EWC2;Q13576;F2Z2E2;Q86VI3	1.0145	P46781;B5MCT8;C9JM19;F2Z3C0;A8MXK4	1.717	Q00059;A8MRB2;H7BYN3	0.77439
		Q14739;C9JXK0	1.0961	P62750;H7BY10;K7EJV9;K7ERT8;A8MUS3;K7EMA7	1.0049	P46976-3;P46976-2;P46976;G5E9W8;C9JQ42;D3DNH0;C9J8R8;C9J7C7	0.97245	P46783;F6U211;Q9NQ39	0.98999	Q00325-2;F8VVM2;Q00325;F8VWQ0;F8VZL5;F8VWR4	1.1798
		Q14914-2;Q14914;F2Z3J9;Q5JVP3;F6XGT7;Q5JVP2	1.0699	P62753;A2A3R5;A2A3R7	1.0717	P46977;E9PNQ1;E9PIJ8;E9PN73;E9PI32;H0YET6	0.99307	P46821	NaN	Q00341;Q00341-2;H0Y394;C9JT62;C9JHS7;C9JK79;C9JHZ8;C9JES8;C9JZI8;C9J5E5;C9JIZ1;H7C2D1;H7C0A4;C9JHS9;C9J739;C9JMQ6;C9JQ82;C9JBS3;C9JEJ8;C9JKQ5;C9JHN6;H7BZC3	0.72345
		Q14974;B7ZAV6;F5H4R7;J3KTM9;J3QR48;J3QKQ5;J3KS06;J3QRG4	0.98393	P62805	0.98123	P47755;F8W9N7;C9JUG7;B4DG50	0.8461	P46940;H0YLE8;E9PDT6;Q13576-2;J3KR91;F5H7S7;E7EWC2;Q13576;F2Z2E2;Q86VI3	0.98396	Q00535-2;Q00535	0.5665
		Q14978;Q14978-2;Q14978-3	1.0051	P62820;B7Z8M7;E7END7;P62820-2;P62820-3;E7ETK2	1.0002	P47813;O14602;A6NJH9	0.93051	P46977;E9PNQ1;E9PIJ8;E9PN73;E9PI32;H0YET6	0.99214	Q00577	0.88989
		Q14980-2;Q14980;Q14980-4;Q14980-3;H0YFY6;Q9BTE9;K4DIE0;F5H6Y5;F5H4J1	1.2702	P62829;C9JD32;J3KT29;B9ZVP7;J3KTJ3;J3QQT9	0.96115	P47897;B4DWJ2;B7Z840;C9J165;H7C0R3;C9JSG9;F2Z2V6	1.0524	P47755;C9JUG7;B4DG50;F8W9N7	0.87403	Q00610-2;Q00610;J3KS13;P53675-2;P53675;J3KR87;K7EJJ5;J3KSQ2;J3QL20;J3KRF5;F5H5N6	0.95227
		Q14CX7-2;Q14CX7;H0YHR9	1.1294	P62834	0.98976	P47914	0.83339	P47813;O14602;A6NJH9	0.96817	Q00688;G3V5F2	0.98994
		Q15019;Q15019-2;B5MCX3;C9J938;C9JB25;C9J2Q4;C9IY94;C9IZU3;C9JFT1;F8WB65;B5MD47;C9JZI2;C9JQJ4;H7C310;H7C2Y0;C9JT15;C9JSE7	0.89004	P62851	1.0045	P47985;P0C7P4	0.86961	P47914	0.88639	Q00796;H0YLA4;B7Z3A6;H0YKB3	0.83796
		Q15029-2;Q15029;K7EJ81;K7EP67;K7EJ74	0.9408	P62854;Q5JNZ5	1.04	P48047;H7C0C1;H7C068;H7C086	0.98193	P47985;P0C7P4	0.95881	Q00839;Q00839-2;Q5RI18	1.0294
		Q15046;Q15046-2;H3BVA8;J3KRL2;H3BPV7;H3BRC9	1.0224	P62857	1.0434	P48147	0.88408	P48047;H7C068;H7C0C1;H7C086	0.94679	Q01081-2;Q01081;Q01081-4;Q8WU68-3;Q8WU68;M0QYK5;Q01081-3;M0R2N4;Q8WU68-2;K7EPL9;K7EJH3;K7EJM7;K7ERY8	0.97687
		Q15050	0.92375	P62861;E9PR30	1.0069	P48163;B4DZ70;F5H4W0	0.81067	P48147	1.2089	Q01082;Q01082-3;Q01082-2;F8W6C1;P11277-3;P11277;P11277-2;O15020-2;O15020	0.96388
		Q15056-2;Q15056	0.92979	P62873;F6X3N5;F6UT28;B1AKQ8;B3KVK2	1.0234	P48507	0.89924	P48507	0.79333	Q01085;Q01085-2;E7ETJ9;Q49AS9;C9JTN7;P31483-2;F8W8I6;P31483;A6NKZ9;F8WE16;E7ETC0;E5RGV5;H7BY49;E5RG67;Q96B58	0.84463
		Q15075	NaN	P62875	1.0454	P48556;K7EJR3;K7EJC1;K7ERW6;K7ENY6	0.96541	P48637;B7Z514;B6F210	1.0838	Q01105-2;Q01105-3;Q5VXV2;Q01105	0.96782
		Q15102;M0R389;M0QXS6;M0R323;M0QZT2;M0R1K3	0.92951	P62877	0.96862	P48637;B7Z514;B6F210	0.98824	P48643;E7ENZ3;B7ZAR1;E9PCA1;B4DYD8;D6RIZ7;H0Y914	0.97728	Q01469;I6L8B7;A8MUU1	1.0544
		Q15149;Q15149-7;Q15149-8;Q15149-9;Q15149-5;Q15149-4;Q15149-6;Q15149-3;Q15149-2;E9PMV1	0.90003	P62879;C9JIS1;C9JXA5;E7EP32;C9JZN1;B3KPU1;C9JD14;F5H100;F5H8J8;F5H0S8;E9PCP0;P16520;H7C5J5	0.97169	P48643;E7ENZ3;B7ZAR1;E9PCA1;B4DYD8;D6RIZ7;H0Y914	0.96986	P48651;J3KNR6;B4DE85;Q9BUQ5	1.0414	Q01518-2;Q01518;Q5T0R1;Q5T0R9;Q5T0R7;Q5T0R6;Q5T0R5;Q5T0R4;Q5T0R3;Q5T0R2;Q5T0S3;Q5T0R8	0.91867
		Q15181;Q5SQT6	1.0135	Q59GN2;P62891	0.99419	P48729;P48729-2;H0Y9X2;D6REM4;E7ETM0;Q71TU5;Q8N752	1.0776	P48735;B4DFL2;B4DSZ6;H0YL11	0.98269	Q01581	1.1411
		Q15233;Q15233-2;H7C367;C9JYS8;C9IZL7;C9J4X2	1.0098	P62899;H7C2W9;C9JU56;B7Z4E3;P62899-3;P62899-2;B7Z4C8;B8ZZK4	1.0086	P48735;B4DFL2;B4DSZ6;H0YL11	0.97315	P49006	0.84881	Q01780;B4DKG8;Q01780-2	1.3595
		Q15293;B7Z1M1;E9PNT6;E9PJD5	1.0203	P62906	1.18	P49006	0.88044	P49189;B4DXY7	0.99046	Q01813;Q01813-2;Q5VSR5;B1APP6;Q5VSR6;B1APP8;H0Y757;H0Y3Y3	0.9549
		Q15365	0.98555	P62913	0.99553	P49189;B4DXY7	0.97131	P49207	0.91117	Q02539	0.37664
		Q15366-6;Q15366-3;Q15366-4;Q15366;Q15366-2;H3BRU6;G3V0E8;F8VZX2;Q15366-5;B4DLC0;B4DXP5;F8VRG9;F8VWQ4;F8VXH9;F8W0G4;F8W1G6;F8VRH0;P57721-5;E9PFP8;P57721-4;P57721;H3BSS4;J3QT27;P57721-2;P57721-3;H3BND9;F8VTZ0	0.98855	P62917;E9PKZ0;E9PIZ3;E9PKU4;G3V1A1;E9PP36	0.88048	P49207	0.98473	P49257	0.96009	Q02543;M0R3D6;M0R1A7;M0R117;B4DM74;M0R0P7	1.5702
		Q15393;Q15393-3;Q15393-2;H3BMB0;J3QRB2;J3QL37;I3L4G7;J3QKV4	0.89687	P62937;Q567Q0;F8WE65;C9J5S7;Q9Y536;F5H284;E5RIZ5;A2BFH1	1.0034	P49257	0.91422	P49321;P49321-3;P49321-2;Q5T624;F5H3J2;H0YDS9;H0YF33;E9PI86;E9PRH9;E9PPQ8;E9PPR5	1.0052	Q02750-2;Q02750;G5E9C7;P36507	0.88812
		Q15428;K7EP23;K7EMT0;K7EKV8	0.99217	P62942;Q5W0X3;Q1JUQ5	1.0167	P49321;P49321-3;P49321-2;F5H3J2;Q5T624;H0YDS9;H0YF33;E9PRH9;E9PI86;E9PPQ8;E9PPR5	1.0216	P49327;J3KTF0	1.0151	Q02790;F5H1U3;H0YFG2;F5H120	0.9881
		Q15459;E9PAW1;H7C1L2	1.2127	P62979	0.88101	P49327;J3KTF0	1.0034	P49354-2;P49354;E9PPM9;H0YCW1;H0YE66;E9PQP6	0.85817	Q02878;F8W181;F8VZ45;F8VR69;F8VZA3;F8VWR1;F8VRY1	1.139
		Q15637-4;Q15637-6;Q15637-3;Q15637-2;Q15637;Q15637-5;Q15637-7;F8WEV5;B4DX42;C9J792	0.882	P62987;J3QS39;J3QTR3;F5H6Q2;F5GYU3;F5H2Z3;M0R2S1;F5H265;F5H7Y5;B4DV12;F5H388;F5H747;F5GXK7;J3QKN0;P0CG47;Q96C32;F5H7K6;F5H041;P0CG48;M0R1M6;M0R1V7;F5H4D8;J3QLP7;J3QRK5;J3QSA3;K7EMA8;F5GZ39;J3KSM4	1.0321	P49354-2;P49354;E9PPM9;H0YCW1;H0YE66;E9PQP6	1.1764	P49368;P49368-2;B4DUR8;E9PRC8;Q5SZX6;E9PM09;E9PQ35;Q5SZX9;Q5SZW8	1.0232	Q02880-2;Q02880;E9PCY5;B4DLV2	1.11
		Q15645	0.85941	P62993;P62993-2;J3KT38;J3QRL5;J3QLF6	0.99345	P49368;P49368-2;B4DUR8;E9PRC8;Q5SZX6;E9PM09;E9PQ35;Q5SZX9;Q5SZW8	1.0175	P49406	1.5911	Q02952-3;Q02952-2;Q02952	1.0342
		Q15654	0.47234	P62995-3;P62995;H7BXF3;H7C2L4	1.0227	P49406	1.6023	P49411;H3BNU3	0.98665	Q04760;Q04760-2	1.0484
		Q15691	0.98774	P63000;P63000-2;B1AH77;B1AH80;P15153;B1AH78	1.0227	P49411;H3BNU3	0.99534	P49419-2;P49419;F8VS02;P49419-4;P49419-3;H0YHM6;F8VVF2	0.96685	Q04837;E7EUY5;C9K0U8	0.88117
		Q15751	0.099963	Q7Z451;P63010;P63010-2;K7EJT8;Q10567-4;Q10567-3;Q10567-2;Q10567;C9J1E7;K7EN71;K7ERB2;K7EJX1	1.1283	P49419-2;P49419;F8VS02;P49419-4;P49419-3;H0YHM6;F8VVF2	0.95379	P49458;E9PE20;P49458-2	1.0111	Q04917;A2IDB2;F8WEB6;A2IDB1	0.78278
		Q15785	0.7781	P63104;E7EX29;E7ESK7;B0AZS6;E5RIR4;E9PD24;E7EVZ2;E7EX24;E5RGE1;B7Z2E6;H0YB80	0.99274	P49458;E9PE20;P49458-2	0.97084	P49588;H3BPK7	0.87892	Q04941-2;Q04941	1.2043
		Q15836;K7ENK9;K7EKX0;J3QRU4;P63027;F8WCA0;L7N2F9	0.97919	P63151;P63151-2;E5RIY1;E5RFR9;Q66LE6;Q9Y2T4-3;Q00005-6;Q9Y2T4-4;Q00005;Q00005-2;Q9Y2T4-2;Q9Y2T4;Q00005-3;Q00005-4;Q00005-5;Q00005-7	0.92477	P49588;H3BPK7	0.92307	P49591;Q5T5C7	0.87779	Q05048;A3KFI9	0.96848
		Q15843;E9PS38;F8VSA6;E9PL57	1.0024	P63167;F8VXI7;F8VXL2;F8VRV5	0.90425	P49591;Q5T5C7	0.89258	P49643	1.0403	Q5T760;Q05519-2;Q05519;B4DWT1;B4DTC1;Q5T757	0.84185
		Q16186	1.154	Q5VTU3;P63172	1.0338	P49643	1.0072	P49711;P49711-2;Q8NI51-6;Q8NI51-5;Q8NI51-2;E7EUE3;Q8NI51;Q8NI51-3;A6XGL8	1.2281	Q05639	0.83243
		Q16222-2;Q16222-3;Q16222;B1AR80;Q3KQV9	1.0441	P63173;J3KT73;J3QL01;J3KSP2	0.99438	P49721	0.96675	P49721	0.99629	Q06124-2;Q06124;Q06124-3	1.3116
		Q16513-3;Q16513-2;Q16513;B1AL79;Q16513-4;Q16513-5	0.96734	P63218	1.1836	P49736;H0Y8E6	1.0302	P49736;H0Y8E6	1.026	Q06203;D6RE15;D6RCC8	0.9699
		Q16531;F5GY55;F5H775;F5H581;F5H6C5;F5H238;B4DG00;F5H4N9;F5GYG8;F8WF81;F5GWI0;F5GZY8;F5H198;F5H2L3;F5H7A0;F5GZ34;F5H0Y5	1.0503	Q8WVC2;P63220;Q9BYK1;Q9BYK2	1.1177	P49748-2;P49748;P49748-3;G3V1M7;K7EMF8;J3KS89;K7EJW8;J3QRJ8;K7EQP4	NaN	P49755;G3V2K7	0.98222	Q06210-2;Q06210;E5RJP4;O94808	0.98621
		Q16555-2;Q16555	1.2922	P63244;J3KPE3;D6RAC2;D6RHH4;H0Y8W2;D6REE5;H0YAF8;D6R9Z1;D6R9L0;D6RFX4;H0YAM7;D6RAU2;E9PD14;D6RBD0;D6RFZ9;H0Y8R5;D6RF23;D6RGK8;D6R909;D6RHJ5;H0Y9P0;D6RDI0	1.0614	P49755;G3V2K7	1.0048	P49756;P49756-2;P49756-3;E9PQU5;H0YE46;E9PSE8;P49756-4	0.81087	Q06323;H0YNE3;A6NJG9;H0YKK6;H0YLU2	0.9279
		Q16576;E9PC52;Q16576-2;Q5JP01;Q5JNZ6;C9J7L0	0.96747	P63261;I3L3I4;I3L3I0;I3L1U9;I3L4N8;K7EM38;I3L3R2;J3KT65	1.0426	P49756;P49756-2;P49756-3;E9PQU5;H0YE46	0.96287	P49770;H0YJJ8;G3V5E5;H0YK01	0.93353	Q06830	0.96232
		Q16718;F8WAS3;H7BYD0;Q5H9R2;C9IZN5	0.66131	P63279;H3BPC4;H3BQQ9;B0QYN7	0.83308	P49770;H0YJJ8;G3V5E5;H0YK01	0.74975	P49773;D6REP8;D6RE99;D6RD60;D6RC06	1.0053	Q07021;I3L3Q7;I3L3B0	0.93619
		Q16878	1.1657	P67775;P62714;H0YC23;P67775-2;E5RHC1;E5RFI3;E5RHP4;E7ESG8;H0YBN9;H3BV22;H3BTA2;P60510	1.0163	P49773;D6REP8;D6RE99;D6RD60;D6RC06	0.96483	P49792;E9PGT0;F8WBP7;H7BZ48;E7ES93;J3KQ37;P0DJD0;J3QTV4;P0DJD1;F8VYC4;Q99666;O14715	1.0446	Q07065	0.92242
		Q29RF7	0.85716	P67809;H0Y449;C9J5V9	1.0184	P49792;E9PGT0;E7ES93;P0DJD0;J3QTV4;P0DJD1;F8VYC4;F8WBP7	1.0186	P49903;D6PSQ9;B4DWK0;Q5T5U9;Q5T5U6	0.87405	Q07666-2;Q07666;Q07666-3	0.91435
		Q2NL82	1.0958	P67870;Q5SRQ6;Q5SRQ3	0.93493	P49915;F8W720	1.0164	P49915;F8W720	1.024	Q07812-5;Q07812-7;Q07812-8;Q07812;Q07812-2	1.0554
		Q2TAY7;B4E3L0	1.0922	P67936;P67936-2;K7ENT6;K7EMU5;K7EPV9;K7EPB9	0.96484	P49916;P49916-2;K7EQB6;K7ERZ5	0.95772	P49916;P49916-2;K7EQB6;K7ERZ5	0.98528	Q07960	0.85894
		Q3KQU3-3;Q3KQU3-2;Q3KQU3-4;Q3KQU3	0.87118	P68133;P68032;P63267;P62736;Q5T8M8;A6NL76;F8WB63;B8ZZJ2;C9JFL5;F6UVQ4;F6QUT6	0.98406	P50213;H0YL72;P50213-2;H0YLI6;H0YMU3;B7Z9J8;H0YKD0;H0YM64;H0YNF5;H0YM46	0.99924	P50213;H0YL72;P50213-2;B7Z9J8;H0YLI6;H0YMU3;H0YKD0;H0YM64;H0YNF5;H0YM46	1.0241	Q08211;Q08211-2	1.038
		Q3ZCM7;F5H0I4;C9JAA5;Q5SQY0;I3L2F9;A6NNZ2;A6NKZ8;Q9H4B7;CON__ENSEMBL:ENSBTAP00000025008;F8W813	0.97369	P68104;Q5VTE0;A6PW80;Q5JR01	1.0476	P50402;Q5HY57;F8WEQ1	1.0709	P50402;Q5HY57;F8WEQ1	0.996	Q08257-3;Q08257;Q08257-2;C9JH92;A6NP24	0.77515
		Q3ZCQ8;Q3ZCQ8-2;M0R003;M0R0C3;M0QXC3;M0R2Z3;M0R303;M0R2F8;Q330K1;M0R2D2;M0R1Y4;M0R047	0.93504	P68371	0.98339	P50454;E9PKH2;E9PR70;E9PPV6;E9PK86;E9PMI5;H0YEP8;E9PJH8;E9PIG2;E9PRS3;E9PNX1;E9PLA6;E9PQ34	0.99095	P50454;E9PKH2;E9PR70;E9PPV6;E9PK86;E9PMI5;E9PNX1;H0YEP8;E9PJH8;E9PIG2;E9PRS3;E9PLA6;E9PQ34	0.95929	Q08380	0.76113
		Q52LJ0;Q52LJ0-2	0.97753	P68402;P68402-3;P68402-2;P68402-4;J3KNE3	0.98863	P50502;H7C3I1;Q8IZP2;F6VDH7;Q8NFI4;F8WAQ7	0.94676	P50502;Q8NFI4;H7C3I1;Q8IZP2;F6VDH7;F8WAQ7	0.93372	Q08722-2;Q08722-3;Q08722-4;Q08722	1.0955
		Q53GQ0;E9PI21	0.91001	P68431	0.82261	P50552;K7ENR7;K7ENL7	0.71556	P50552;K7EM16	0.60206	Q08752	0.84498
		Q53H82	0.87811	P78344-2;P78344;H0Y3P2;D3DQV9;E9PKF8;H0YD77;H0YCH5;H0YE22;H0YEC5	0.913	P50750;P50750-2	0.77801	P50750;P50750-2;K7EJ83;H0YAZ9;Q00534;E7EUK8;Q96Q40-2;Q96Q40-4;E5RGN0;Q96Q40-3;O94921-3;F8W6H8;Q96Q40;O94921-2;O94921;F5H6Z0;Q07002;Q07002-2;Q00536;Q00536-3;Q07002-3;Q00537-2;Q00537;Q00536-2;J3QSD7;Q9NYV4-3;Q14004-2;Q9NYV4-2;Q9NYV4;Q14004	1.0094	Q08945;E9PPZ7;E9PMD4	1.0221
		Q562R1	0.84331	P78346;P78346-2;Q5VU11	0.7147	P50897;E9PMG2;E9PP28;E9PK48;E9PSE5;Q5T0S4;P50897-2	1.0477	P50897;E9PP28;E9PK48;E9PMG2;E9PSE5;P50897-2	1.0251	Q08J23-2;Q08J23;G3V1R4;D6RAS3	1.0876
		Q58FF8	1.1604	P78347-2;P78347-4;P78347-3;P78347;H7BYM4;Q86U51;G8JLD9;Q86UP8-3;Q86UP8;Q6EKJ0	1.0475	P50990;B4DEM7;B4DQH4;H7C4C8;H7C2U0	1.0098	P50990;B4DEM7;B4DQH4;H7C4C8;H7C2U0	0.99636	Q09028-3;Q09028;Q09028-4;Q09028-2;H0YF10;H0YCT5;H0YDK2;H0YEU5;B4DRT0;E9PNS2;E9PIC4;E9PNS6	0.88948
		Q5BKZ1;Q5BKZ1-3;E2QRN4;Q5BKZ1-2	1.0908	P78371;P78371-2;F5GWF6;F8VQ14	1.0488	P50991;P50991-2;B7Z9L0;B7Z2F4	0.99748	P50991;P50991-2;B7Z9L0;B7Z2F4	0.98727	Q09161	1.0606
		Q5JQQ4;Q9BVM2	1.103	P78417;Q5TA02;P78417-3;P78417-2;Q5TA01	0.9777	P51116;F8W871	1.0667	P51116	0.99109	Q12788;J3KNP2	0.89492
		Q5JY77	1.0177	P78527;E7EUY0;P78527-2;H0YG84;F5GX40	1.0402	P51148;P51148-2;K7ERI8;K7ERQ8;F8VVK3;K7ENY4;F8VWU4;F8VVZ0;F8VUA5;P61020-2;B4DJA5;P61020;P20339;F8WC93;F8WCY6;F8WD79;F8VPW9;F8VSF8;F8VWZ7	1.0584	P51148;P51148-2;F8VWU4;F8VVZ0;F8VUA5;F8VVK3;K7ERI8;P61020-2;B4DJA5;P61020;P20339;K7ERQ8;F8WC93;F8WCY6;F8WD79;F8VPW9;F8VSF8;F8VWZ7;K7ENY4	1.0524	Q12904;Q12904-2;D6R937	0.74316
		Q9Y5K5-2;Q9Y5K5-4;Q9Y5K5-3;Q9Y5K5;Q5LJA5;Q5LJA9;Q5LJB0;H0Y636;H0Y4E0;B4DW59;B7Z9U9;H0Y6Y4;H0Y4K0	0.89663	P80723;P80723-2	0.79275	P51149;C9J592;C9J8S3;C9IZZ0;C9J4V0;C9J4S4;C9J7D1	1.0261	P51149;C9J592;C9J8S3;C9IZZ0;C9J4V0;C9J7D1;C9J4S4	0.99394	Q12905	0.93921
		Q5QPD0;Q5TFE4	0.74649	P82673-2;P82673;H0YG82	0.95319	P51153	1.0356	P51153	0.96155	Q12996	0.81794
		Q5QPE4;Q5QPE5;Q9Y5X3	1.2236	P82921	1.1149	P51398-2;P51398-3;P51398	0.99944	P51398-2;P51398-3;P51398	0.85221	Q13011;M0R248	1.0654
		Q5QPL9;Q9UKM9-2;Q9UKM9;Q5QPM0;Q5QPM1;Q5QPM2	0.94449	P82933	1.2303	P51532-5;P51532-2;P51532-3;P51532-4;P51532;Q9HBD4;P51531-2;P51531;H0YGM3;K7EP28;F6XE55;F6XDY1;F6UH26;B1ALG1;B1ALG2;F6XG14;B1ALF6	1.0036	P51532-5;P51532-2;P51532-3;P51532-4;P51532;Q9HBD4;P51531-2;P51531;H0YGM3;K7EP28;F6XE55;F6XDY1;F6UH26;B1ALG1;B1ALG2;F6XG14;B1ALF6	0.89678	Q13057;Q13057-2;K7EP09;K7EQ60;K7ESK6;K7ES73;K7EN91	1.3288
		Q5SSJ5;B0QZK9;B0QZK8;Q5SSJ5-5;B0QZK4;Q5SWC8;Q5SSJ5-3;Q5SSJ5-2	0.55595	P84085;C9J1Z8;F5H1V1;F5H6T5;F8WCJ5;F8WDB3	1.0086	P51553;E9PDD5;H7C1R3;G5E9Q7;E7EQB8;H0Y5Q7;E9PF84;H7C1W2	1.0759	P51571;H7C1C6;A6NLM8	0.93255	Q13112	0.82266
		Q8NFF5-4;Q8NFF5-5;Q8NFF5-3;Q5T196;Q8NFF5-2;Q8NFF5	0.77469	P84090;G3V279	0.94971	P51571;H7C1C6;A6NLM8	0.96323	P51572;P51572-2;C9JSP1;C9JQ75;C9J0M4;C9JMD7;C9JM14	0.98699	Q13123;D6REL4;E7EQZ7	0.8339
		Q9Y6H1;Q5T1J5	NaN	P84157-2;P84157-3;P84157	0.8766	P51572;P51572-2;C9JSP1;C9JQ75;C9J0M4;C9JMD7;C9JM14	1.0054	P51659;E7EWE5;P51659-3;P51659-2;E7ER27;G5E9S2;E7ET17;E7EPL9	0.93894	Q13148;Q13148-2;B1AKP7;G3V162;K7EJM5;K7EN94;B4DJ45;Q13148-3;K7EL26;K7EJ99	0.93179
		Q8NCW5-2;Q5T3I4;Q5T3I3;Q8NCW5	0.95549	P98179	1.0948	P51659;E7EWE5;P51659-3;P51659-2;E7ER27;G5E9S2;E7ET17;E7EPL9	0.97468	P51665;H3BNT7;H3BTM8;B4DXI8;H3BQV2	0.99018	Q13151	1.0858
		Q5T3Q7;Q9H583	0.72717	Q00059;A8MRB2;H7BYN3	1.0722	P51665;B4DXI8;H3BNT7;H3BTM8;H3BQV2	0.98494	P51688;I3L2I6;I3L4B7;I3L2L4;F5H6A3	1.0035	Q13155;A8MU58;F8W950	1.1108
		Q9UBQ7;Q5T946	1.0832	Q00341-2;Q00341;H0Y394;H7C0A4;C9JT62;C9JHS7;C9JK79;C9JHZ8;C9JES8;C9JZI8;C9J5E5;C9JIZ1;H7BZC3;H7C2D1	1.1282	P51858;A8K8G0;P51858-2;Q5SZ07	0.97305	P51809-3;P51809;P51809-2	0.81198	Q13162;H7C3T4;A6NJJ0;A6NG45	0.92285
		Q5TB20;Q9BTT0;E9PPH5;Q5TB19;E9PLC4	0.93005	Q00534	1.8297	P51970;F5H7V7	0.90945	P51858;A8K8G0;P51858-2;Q5SZ07	0.92448	Q13177;O75914-2;O75914;O75914-4;O75914-3;H7C1X3;H0YCG5;E9PM17;B3KNX7;Q13153;Q13153-2;B1AKS5	0.83975
		Q5TCU6;Q9Y490;H0YMT1;Q9Y4G6	0.79512	Q00535;Q00535-2	1.1272	P51991;E7EWI9;P51991-2;H7C1J8	1.0225	P51970;F5H7V7	0.94873	Q13185;C9JMM0;B8ZZ43	0.91084
		Q5VVQ1;Q99598	1.3545	Q00577;Q96QR8	0.99297	P52272-2;P52272;M0QZM1;M0R019;M0R2T0;M0R2I7;M0R0N3;M0QYQ7;M0R0Y6;M0QY96;M0QYL3	1.0467	P51991;E7EWI9;P51991-2;H7C1J8	1.0291	Q13200;E7EW34;E9PCS3;H7C1H2;C9JPC0;H7C2Q3;F8WBS8	0.91516
		Q5VYW8;Q9Y2P8	1.9198	Q00610-2;Q00610;J3KS13;P53675-2;P53675;J3KR87;K7EJJ5;J3KSQ2;J3QL20;J3KRF5;F5H5N6	1.0229	P52292;J3QLL0;J3KS65;J3QL07	0.87003	P52272-2;P52272;M0QZM1;M0R019;M0R2T0;M0R2I7;M0R0N3;M0QYQ7;M0R0Y6;M0QY96;M0QYL3	1.0538	Q13242;H0YIB4	1.034
		Q5VZM0;Q7L523;Q5VZM2-2;Q5VZM2	0.6933	Q00688;G3V5F2	1.0662	P52294;C9JYI4;C9J352;C9JWD9;F2Z3G4;C9J4U1	NaN	P52292;J3QLL0;J3KS65;J3QL07	0.85403	Q13243-3;Q13243	0.81582
		Q5W011;Q5W010;Q96I25	0.90768	Q00796;H0YLA4;B7Z3A6;H0YKB3	0.87285	P52597	1.0778	P52294;C9JYI4;C9J352;C9JWD9;F2Z3G4;C9J4U1	NaN	Q13247-3;Q13247;Q13247-2	1.1051
		Q9NP72-3;Q5W0J0;Q9NP72;Q9NP72-2	1.1599	Q00839;Q00839-2;Q5RI18	1.0313	P52701;P52701-2;F5H2F9;B4DF41;C9JH55;C9J8Y8;C9J7Y7;F8WAX8	0.94909	P52597	1.0579	Q13263;Q13263-2;M0R0K9;M0R2I3;M0R3C0	0.92706
		Q8WWM7-6;Q8WWM7-8;Q8WWM7-5;Q8WWM7-4;Q8WWM7-2;Q63ZY4;Q8WWM7;Q8WWM7-3;H3BUF6;H3BSK9;Q8WWM7-7;H3BRB0	0.98523	Q01081-2;Q01081;Q8WU68-3;Q8WU68;M0QYK5;Q01081-3;M0R2N4;Q01081-4;Q8WU68-2;K7EJH3;K7EJM7;K7ERY8;K7EPL9	0.99282	P52732	1.0065	P52701;F5H2F9;B4DF41;P52701-2;F8WAX8;C9JH55;C9J8Y8;C9J7Y7	0.91635	Q13283;E5RIZ6;E5RI46;E5RIF8;E5RH42;Q5HYE9;E5RJU8;F5H4D6;E5RH00	1.0319
		Q6GMV3	0.82228	Q01082;Q01082-3;Q01082-2;F8W6C1;P11277-3;P11277;P11277-2;O15020-2;O15020	0.98512	P52758;E5RI71;H0YBX3;H0YB34	0.82006	P52758;E5RI71;H0YBX3;H0YB34	0.85464	Q13347;Q5TFK1	0.97217
		Q9Y3B3-2;Q9Y3B3;Q6JUT2	1.4496	Q01085;Q01085-2;C9JTN7;P31483-2;E7ETJ9;E7ETC0;Q49AS9;F8W8I6;P31483;A6NKZ9;F8WE16;E5RGV5;H7BY49;E5RG67;Q96B58	1.0376	P52788-2;P52788;B4DE40;H7C2R7	1.1316	P52788;B4DE40;P52788-2;H7C2R7	1.0516	Q13404;Q13404-8;Q13404-7;Q13404-2;Q13404-1;G3V2F7;Q13404-6	0.99977
		Q6NZ53;Q96J01;H7C0C5;D6RGZ2;D6REC9	0.96107	Q01105-3;Q5VXV2;Q01105-2;Q01105	0.97709	P52888;K7EP46;K7EIK4;K7EL32;B3KSE2;K7EL02;K7EKB6;K7EMU4	0.97487	P52907	0.96148	Q13425-2;Q13425	0.79429
		Q6P1J9	1.0459	Q01469;I6L8B7;A8MUU1	1.0253	P52907	0.95216	P53004;C9J1E1	0.94604	Q13435;E9PPJ0;E9PJ04;E9PJT3;H0YCG1;H0YEX5;E9PIL8;H0YDT7	0.8858
[truncated: 964 more rows]
