# Supplementary material for: An optimization of the LC-MS/MS workflow for deep proteome profiling on an Orbitrap Fusion
Source: Royal Society of Chemistry journal article supplement (doi:10.1039/c5ay01900a), 2015-12-02
Supplement: c5ay01900a3.xlsx [file c5ay01900a3.xlsx]

## Sheet: Table S9
Table S10 KEGG pathways analysis of the phophoproteins from mouse liver tissue.
Pathways	Number of identified proteins	Number of total proteins	% Identified proteins
Huntington's disease	37	183	20.2186
Pathways in cancer	37	323	11.4551
Alzheimer's disease	35	182	19.2308
Insulin signaling pathway	34	138	24.6377
MAPK signaling pathway	31	265	11.6981
Tight junction	31	135	22.963
Spliceosome	29	124	23.3871
Focal adhesion	29	198	14.6465
Endocytosis	28	202	13.8614
Ribosome	26	89	29.2135
Parkinson's disease	26	133	19.5489
Regulation of actin cytoskeleton	25	217	11.5207
Oxidative phosphorylation	23	130	17.6923
Neurotrophin signaling pathway	21	130	16.1538
Calcium signaling pathway	20	191	10.4712
ErbB signaling pathway	19	87	21.8391
Valine, leucine and isoleucine degradation	19	46	41.3043
Prostate cancer	19	90	21.1111
Fc gamma R-mediated phagocytosis	19	98	19.3878
Vascular smooth muscle contraction	19	120	15.8333
GnRH signaling pathway	18	97	18.5567
PPAR signaling pathway	17	79	21.519
Drug metabolism	17	75	22.6667
Chemokine signaling pathway	16	182	8.79121
Oocyte meiosis	16	115	13.913
Leukocyte transendothelial migration	16	119	13.4454
Gap junction	15	86	17.4419
mTOR signaling pathway	14	54	25.9259
Adipocytokine signaling pathway	14	67	20.8955
Butanoate metabolism	14	37	37.8378
Metabolism of xenobiotics by cytochrome P450	14	66	21.2121
Glycolysis / Gluconeogenesis	14	68	20.5882
Adherens junction	14	76	18.4211
Propanoate metabolism	13	30	43.3333
Glioma	13	64	20.3125
Long-term potentiation	13	70	18.5714
Apoptosis	13	87	14.9425
Wnt signaling pathway	12	149	8.05369
Pyruvate metabolism	12	41	29.2683
Fatty acid metabolism	12	45	26.6667
Acute myeloid leukemia	12	57	21.0526
Cardiac muscle contraction	12	78	15.3846
Melanogenesis	12	100	12
Fc epsilon RI signaling pathway	11	82	13.4146
T cell receptor signaling pathway	11	118	9.32203
Tryptophan metabolism	11	40	27.5
Endometrial cancer	11	52	21.1538
Arginine and proline metabolism	11	53	20.7547
Retinol metabolism	11	68	16.1765
Renal cell carcinoma	11	70	15.7143
Chronic myeloid leukemia	11	76	14.4737
Cell cycle	11	128	8.59375
Axon guidance	11	131	8.39695
Purine metabolism	11	157	7.00637
RIG-I-like receptor signaling pathway	10	68	14.7059
Phosphatidylinositol signaling system	10	75	13.3333
VEGF signaling pathway	10	76	13.1579
Alanine, aspartate and glutamate metabolism	10	30	33.3333
RNA degradation	10	60	16.6667
Pancreatic cancer	10	72	13.8889
Hypertrophic cardiomyopathy (HCM)	10	84	11.9048
Progesterone-mediated oocyte maturation	10	85	11.7647
Colorectal cancer	10	86	11.6279
Antigen processing and presentation	10	91	10.989
Viral myocarditis	10	94	10.6383
Lysosome	10	119	8.40336
Notch signaling pathway	9	50	18
NOD-like receptor signaling pathway	9	62	14.5161
B cell receptor signaling pathway	9	80	11.25
Citrate cycle (TCA cycle)	9	31	29.0323
Linoleic acid metabolism	9	46	19.5652
Non-small cell lung cancer	9	54	16.6667
Long-term depression	9	72	12.5
Arrhythmogenic right ventricular cardiomyopathy (ARVC)	9	75	12
Arachidonic acid metabolism	9	83	10.8434
Natural killer cell mediated cytotoxicity	9	122	7.37705
Ubiquitin mediated proteolysis	9	136	6.61765
Toll-like receptor signaling pathway	8	99	8.08081
Jak-STAT signaling pathway	8	152	5.26316
Cysteine and methionine metabolism	8	33	24.2424
Starch and sucrose metabolism	8	36	22.2222
Drug metabolism	8	48	16.6667
Glutathione metabolism	8	52	15.3846
Glycerophospholipid metabolism	8	67	11.9403
Complement and coagulation cascades	8	75	10.6667
Dilated cardiomyopathy	8	92	8.69565
Systemic lupus erythematosus	8	103	7.76699
Nitrogen metabolism	7	23	30.4348
Biosynthesis of unsaturated fatty acids	7	27	25.9259
Basal transcription factors	7	33	21.2121
Prion diseases	7	35	20
Fructose and mannose metabolism	7	37	18.9189
ABC transporters	7	45	15.5556
Melanoma	7	71	9.85915
Cell adhesion molecules (CAMs)	7	154	4.54545
TGF-beta signaling pathway	6	87	6.89655
Circadian rhythm	6	13	46.1538
beta-Alanine metabolism	6	22	27.2727
Pentose phosphate pathway	6	26	23.0769
Glycine, serine and threonine metabolism	6	32	18.75
SNARE interactions in vesicular transport	6	38	15.7895
Aldosterone-regulated sodium reabsorption	6	42	14.2857
Bladder cancer	6	42	14.2857
Nucleotide excision repair	6	43	13.9535
Amyotrophic lateral sclerosis (ALS)	6	57	10.5263
ECM-receptor interaction	6	83	7.22892
Pyrimidine metabolism	6	96	6.25
Selenoamino acid metabolism	5	23	21.7391
Tyrosine metabolism	5	39	12.8205
Lysine degradation	5	41	12.1951
Steroid hormone biosynthesis	5	45	11.1111
Type II diabetes mellitus	5	49	10.2041
Inositol phosphate metabolism	5	54	9.25926
Small cell lung cancer	5	85	5.88235
Cytokine-cytokine receptor interaction	5	244	2.04918
Olfactory transduction	5	960	0.520833
p53 signaling pathway	4	69	5.7971
Protein export	4	8	50
Synthesis and degradation of ketone bodies	4	10	40
Terpenoid backbone biosynthesis	4	14	28.5714
Primary bile acid biosynthesis	4	15	26.6667
Ascorbate and aldarate metabolism	4	15	26.6667
Dorso-ventral axis formation	4	22	18.1818
Porphyrin and chlorophyll metabolism	4	30	13.3333
Androgen and estrogen metabolism	4	33	12.1212
Regulation of autophagy	4	34	11.7647
DNA replication	4	35	11.4286
Ether lipid metabolism	4	35	11.4286
Sphingolipid metabolism	4	42	9.52381
Amino sugar and nucleotide sugar metabolism	4	44	9.09091
N-Glycan biosynthesis	4	46	8.69565
Proteasome	4	47	8.51064
Glycerolipid metabolism	4	47	8.51064
Neuroactive ligand-receptor interaction	4	260	1.53846
Hedgehog signaling pathway	3	54	5.55556
Methane metabolism	3	7	42.8571
Fatty acid elongation in mitochondria	3	8	37.5
Caffeine metabolism	3	9	33.3333
Limonene and pinene degradation	3	15	20
Glyoxylate and dicarboxylate metabolism	3	16	18.75
Pentose and glucuronate interconversions	3	17	17.6471
alpha-Linolenic acid metabolism	3	18	16.6667
Phenylalanine metabolism	3	22	13.6364
Histidine metabolism	3	25	12
Galactose metabolism	3	27	11.1111
Thyroid cancer	3	29	10.3448
Type I diabetes mellitus	3	63	4.7619
Hematopoietic cell lineage	3	84	3.57143
Valine, leucine and isoleucine biosynthesis	2	11	18.1818
One carbon pool by folate	2	16	12.5
Renin-angiotensin system	2	18	11.1111
Mismatch repair	2	22	9.09091
Maturity onset diabetes of the young	2	26	7.69231
Cytosolic DNA-sensing pathway	2	55	3.63636
Graft-versus-host disease	2	58	3.44828
Allograft rejection	2	58	3.44828
Taste transduction	2	60	3.33333
Autoimmune thyroid disease	2	72	2.77778
Phenylalanine, tyrosine and tryptophan biosynthesis	1	5	20
Heparan sulfate biosynthesis	1	27	3.7037
Ubiquinone and other terpenoid-quinone biosynthesis	1	7	14.2857
Intestinal immune network for IgA production	1	54	1.85185
Nicotinate and nicotinamide metabolism	1	25	4
Taurine and hypotaurine metabolism	1	10	10
Homologous recombination	1	27	3.7037
Base excision repair	1	40	2.5
Glycosaminoglycan degradation	1	23	4.34783
RNA polymerase	1	27	3.7037
Basal cell carcinoma	1	55	1.81818
Biotin metabolism	1	2	50
Cyanoamino acid metabolism	1	6	16.6667
Primary immunodeficiency	1	36	2.77778
Vitamin B6 metabolism	1	6	16.6667
Fatty acid biosynthesis	1	6	16.6667
Folate biosynthesis	1	11	9.09091
Glycosphingolipid biosynthesis	1	15	6.66667
O-Mannosyl glycan biosynthesis	1	3	33.3333
D-Glutamine and D-glutamate metabolism	1	3	33.3333
