# Supplementary material for: An optimization of the LC-MS/MS workflow for deep proteome profiling on an Orbitrap Fusion
Source: Royal Society of Chemistry journal article supplement (doi:10.1039/c5ay01900a), 2015-12-02
Supplement: c5ay01900a4.xlsx [file c5ay01900a4.xlsx]

## Sheet: Table S2
Table S2 Protein identifications across 20 fractions.Tryptic peptides from HeLa whole cell lysate digest were pooled into 20 fractions and each fraction were analyzed by a one-hour gradient nano-HPLC/MS/MS analysis.
Accession	Description	ΣCoverage	Coverage(fraction1)	Coverage(fraction2)	Coverage(fraction3)	Coverage(fraction4)	Coverage(fraction5)	Coverage(fraction6)	Coverage(fraction7)	Coverage(fraction8)	Coverage(fraction9)	Coverage(fraction10)	Coverage(fraction11)	Coverage(fraction12)	Coverage(fraction13)	Coverage(fraction14)	Coverage(fraction15)	Coverage(fraction16)	Coverage(fraction17)	Coverage(fraction18)	Coverage(fraction19)	Coverage(fraction20)
Q8WXC6	Myeloma-overexpressed gene 2 protein OS=Homo sapiens GN=MYEOV2 PE=2 SV=3 - [MYOV2_HUMAN]	100																	35.09	35.09	64.91
P05387	60S acidic ribosomal protein P2 OS=Homo sapiens GN=RPLP2 PE=1 SV=1 - [RLA2_HUMAN]	95.65		57.39	28.7	6.96	14.78		20.87		45.22	43.48	40.87	21.74	58.26	40.87	10.43	10.43	25.22	41.74	53.91	57.39
P09382	Galectin-1 OS=Homo sapiens GN=LGALS1 PE=1 SV=2 - [LEG1_HUMAN]	94.07	17.78	36.3	20	11.11	11.11	30.37	11.11	24.44	33.33	13.33	50.37	25.19	43.7	19.26	32.59	34.07	22.22	34.07	31.11	36.3
E7EUT4	Glyceraldehyde-3-phosphate dehydrogenase OS=Homo sapiens GN=GAPDH PE=2 SV=1 - [E7EUT4_HUMAN]	93.52	52.22	53.92	38.23	66.21	47.44	35.84	58.7	74.4	52.56	51.88	64.85	35.84	69.97	49.49	37.88	37.2	51.19	44.37	58.7	61.43
P60174-1	Isoform 2 of Triosephosphate isomerase OS=Homo sapiens GN=TPI1 - [TPIS_HUMAN]	92.37	44.18	42.97	26.1	36.14	45.78	33.33	40.56	43.78	46.18	20.08	25.3	69.08	56.63	37.75	57.43	32.53	54.62	46.99	52.61	41.37
P00441	Superoxide dismutase [Cu-Zn] OS=Homo sapiens GN=SOD1 PE=1 SV=2 - [SODC_HUMAN]	90.91	13.64	9.09	6.49		6.49	6.49	13.64	21.43	38.96	13.64	28.57	23.38	29.22	23.38	23.38	23.38	23.38	40.91	8.44
Q9H0U4	Ras-related protein Rab-1B OS=Homo sapiens GN=RAB1B PE=1 SV=1 - [RAB1B_HUMAN]	90.55	18.41	10.45	7.96	7.96	16.42	8.46	8.46	7.46	12.94	15.92	21.39	3.98	18.91	14.93	9.45	16.92	7.46	25.87	16.92	16.92
O76070	Gamma-synuclein OS=Homo sapiens GN=SNCG PE=1 SV=2 - [SYUG_HUMAN]	90.55	32.28			29.13	29.13	11.81	11.81	11.81	18.9			21.26		28.35	33.86	43.31	51.97	13.39
H0YNS9	GMP reductase 2 (Fragment) OS=Homo sapiens GN=GMPR2 PE=2 SV=1 - [H0YNS9_HUMAN]	89.68		17.46	17.46			17.46		13.49	13.49	35.71	22.22		9.52	9.52
P23528	Cofilin-1 OS=Homo sapiens GN=CFL1 PE=1 SV=3 - [COF1_HUMAN]	88.55	24.1	27.71	21.69	31.33	27.11	51.2	31.33	27.71	24.7	24.7	37.35	30.72	23.49	34.34	24.1	56.63	33.13	15.66	22.29	15.06
P63241	Eukaryotic translation initiation factor 5A-1 OS=Homo sapiens GN=EIF5A PE=1 SV=2 - [IF5A1_HUMAN]	88.31	18.83	29.87	29.22	29.22	50	44.16	42.86	35.06	42.86	58.44	50.65	18.83	61.04	19.48	19.48	22.73	22.73	23.38	28.57	34.42
F6XY72	Nucleoside diphosphate kinase OS=Homo sapiens GN=NME2 PE=2 SV=1 - [F6XY72_HUMAN]	88.31	22.08	22.08	46.75	46.75	22.08	41.56	41.56	53.25	49.35	45.45	58.44	22.08	46.75		22.08	41.56	22.08	35.06		22.08
H0Y8R5	Guanine nucleotide-binding protein subunit beta-2-like 1 (Fragment) OS=Homo sapiens GN=GNB2L1 PE=4 SV=1 - [H0Y8R5_HUMAN]	87.68	9.42	28.99	19.57	19.57	19.57	8.7	12.32	33.33	21.74	21.01		8.7	34.78	23.19	23.19	21.01	34.06	40.58	26.09	41.3
Q16774	Guanylate kinase OS=Homo sapiens GN=GUK1 PE=1 SV=2 - [KGUA_HUMAN]	87.31			11.68	6.09		6.6			11.17	11.17		4.57		5.58	15.74	11.17	8.63	25.38	17.26	15.23
H0YI37	ATP synthase subunit beta, mitochondrial (Fragment) OS=Homo sapiens GN=ATP5B PE=2 SV=1 - [H0YI37_HUMAN]	87.22	24.06		9.77	9.77	9.77	9.77	36.84	37.59	9.77	25.56	9.77	24.06	13.53	29.32	26.32	24.06	40.6	24.81	24.81
P00491	Purine nucleoside phosphorylase OS=Homo sapiens GN=PNP PE=1 SV=2 - [PNPH_HUMAN]	87.2	11.42	12.8	6.23	2.77	16.96	11.07	11.42		35.29	30.45	24.91	17.65	15.57	10.03	3.46	3.46	3.46	15.92	6.57	6.23
Q9UBE0	SUMO-activating enzyme subunit 1 OS=Homo sapiens GN=SAE1 PE=1 SV=1 - [SAE1_HUMAN]	86.99	8.67	14.45	7.8	19.08	10.4	10.98	6.94	7.8	9.83	15.32	9.83	15.32	5.78	6.36		2.6			5.2	10.12
P55327-2	Isoform 2 of Tumor protein D52 OS=Homo sapiens GN=TPD52 - [TPD52_HUMAN]	86.96	39.13	5.43	13.59	20.65	12.5	16.85	17.93	17.93	7.07			17.39	5.43	17.39		17.39		16.85	11.41
M0R042	Tubulin beta-4A chain (Fragment) OS=Homo sapiens GN=TUBB4A PE=4 SV=1 - [M0R042_HUMAN]	86.81		22.92	18.75	11.81	34.03	11.81	34.72	34.72	42.36	34.03	35.42	22.92	34.72		11.81	11.81	22.22	61.11	68.06	31.25
P62937	Peptidyl-prolyl cis-trans isomerase A OS=Homo sapiens GN=PPIA PE=1 SV=2 - [PPIA_HUMAN]	86.67	40.61	41.82	41.82	33.33	48.48	48.48	27.88	58.18	38.79	45.45	36.97	60	40.61	54.55	35.76	35.15	38.79	50.91	58.18	58.18
H3BTH4	ADP-dependent glucokinase (Fragment) OS=Homo sapiens GN=ADPGK PE=2 SV=1 - [H3BTH4_HUMAN]	85.96									24.56							21.05		40.35
B3KYB6	Phosphatidylinositol transfer protein beta isoform (Fragment) OS=Homo sapiens GN=PITPNB PE=2 SV=1 - [B3KYB6_HUMAN]	85.83	7.5	10	10	10	10	10	27.5		10	17.5	25			10.83	10.83		6.67	12.5	12.5
Q15181	Inorganic pyrophosphatase OS=Homo sapiens GN=PPA1 PE=1 SV=2 - [IPYR_HUMAN]	85.81	11.07	25.61	30.8	12.8	21.45	16.26	3.46	9		12.11	12.11	9	25.26	10.38	15.57	22.84	26.64	24.91	17.99	33.56
P04075	Fructose-bisphosphate aldolase A OS=Homo sapiens GN=ALDOA PE=1 SV=2 - [ALDOA_HUMAN]	85.44	25	13.46	20.33	11.81	29.67	16.76	40.38	34.07	44.78	41.21	44.23	18.96	23.08	15.11	24.45	18.13	20.33	29.4	32.14	21.7
P07108	Acyl-CoA-binding protein OS=Homo sapiens GN=DBI PE=1 SV=2 - [ACBP_HUMAN]	85.06			13.79	14.94	12.64	16.09		18.39	18.39	27.59	18.39	22.99	9.2	22.99	22.99	45.98	11.49
P84085	ADP-ribosylation factor 5 OS=Homo sapiens GN=ARF5 PE=1 SV=2 - [ARF5_HUMAN]	84.44	11.67	10				7.78	18.89	11.11	15.56	9.44	23.33	21.11	15	24.44	8.33	6.11	4.44	18.33
Q9GZT3	SRA stem-loop-interacting RNA-binding protein, mitochondrial OS=Homo sapiens GN=SLIRP PE=1 SV=1 - [SLIRP_HUMAN]	84.4	9.17			9.17	12.84	24.77	11.93			5.5	22.94		22.94	11.01	34.86	12.84		6.42	6.42
Q96CP2	FLYWCH family member 2 OS=Homo sapiens GN=FLYWCH2 PE=1 SV=1 - [FWCH2_HUMAN]	84.29	8.57	7.86	7.86								24.29	27.86	7.86	8.57	10	19.29	10	32.86	19.29
P63244	Guanine nucleotide-binding protein subunit beta-2-like 1 OS=Homo sapiens GN=GNB2L1 PE=1 SV=3 - [GBLP_HUMAN]	84.23	14.83	31.23	17.03	16.72	11.04	12.62	16.4	23.34	8.2	11.36	5.05	16.09	28.71	22.4	18.93	19.24	24.92	29.02	23.34	33.75
F5H246	Protein NAMPTL OS=Homo sapiens GN=NAMPTL PE=2 SV=1 - [F5H246_HUMAN]	84.17	6.67		15	15			24.17	44.17			6.67	20	6.67	10.83	10.83		7.5	10.83	14.17
P60660	Myosin light polypeptide 6 OS=Homo sapiens GN=MYL6 PE=1 SV=2 - [MYL6_HUMAN]	84.11	5.96	8.61	8.61	8.61	7.95	28.48	19.21	37.09	15.23	15.23	5.3	5.96	8.61	5.96	13.25	13.25	7.95	13.25	8.61	8.61
P60660-2	Isoform Smooth muscle of Myosin light polypeptide 6 OS=Homo sapiens GN=MYL6 - [MYL6_HUMAN]	84.11	5.96	8.61	8.61	8.61	7.95	10.6	19.21	37.09	15.23	15.23	5.3	5.96	8.61	5.96	13.25	13.25	7.95	13.25	26.49	8.61
P21796	Voltage-dependent anion-selective channel protein 1 OS=Homo sapiens GN=VDAC1 PE=1 SV=2 - [VDAC1_HUMAN]	84.1	14.49	28.62	30.04	12.01	4.95	12.37	21.55	25.09	10.6	8.83	6.36	7.42	10.25	14.49	24.03	14.84	22.26	17.67	17.31	21.91
C9JZG2	Phosphoribosylformylglycinamidine cyclo-ligase (Fragment) OS=Homo sapiens GN=GART PE=4 SV=1 - [C9JZG2_HUMAN]	83.82		11.76			15.44	15.44	15.44	13.97		13.97	13.97	8.09		14.71	22.06	6.62	34.56	42.65	37.5	16.91
Q567Q0	Peptidyl-prolyl cis-trans isomerase A OS=Homo sapiens GN=PPIA PE=2 SV=1 - [Q567Q0_HUMAN]	83.81	20.95	22.86	43.81	26.67	37.14	49.52	12.38	43.81	19.05	38.1	22.86	62.86	20.95	37.14	31.43	24.76	19.05	62.86	48.57	48.57
Q9BWJ5	Splicing factor 3B subunit 5 OS=Homo sapiens GN=SF3B5 PE=1 SV=1 - [SF3B5_HUMAN]	83.72							17.44	30.23			27.91			10.47			15.12
P07437	Tubulin beta chain OS=Homo sapiens GN=TUBB PE=1 SV=2 - [TBB5_HUMAN]	83.56	19.82	38.29	33.33	23.87	31.98	28.15	41.44	38.06	58.56	36.26	44.14	24.32	42.34	22.52	26.58	32.43	25.68	62.16	36.71	39.41
H3BTN5	Pyruvate kinase (Fragment) OS=Homo sapiens GN=PKM PE=2 SV=1 - [H3BTN5_HUMAN]	83.51	12.78	35.88	29.48	36.91	37.53	36.29	29.28	30.31	33.61	41.03	25.77	21.86	36.08	31.34	36.29	37.11	29.48	32.37	34.64	34.02
P68371	Tubulin beta-4B chain OS=Homo sapiens GN=TUBB4B PE=1 SV=1 - [TBB4B_HUMAN]	83.37	10.34	28.76	24.04	17.3	28.99	24.27	35.51	34.83	51.01	38.2	40	24.27	32.81	16.4	17.08	26.29	25.62	52.13	33.26	43.15
O60739	Eukaryotic translation initiation factor 1b OS=Homo sapiens GN=EIF1B PE=1 SV=2 - [EIF1B_HUMAN]	83.19		14.16	28.32	54.87						33.63	22.12	12.39				13.27	13.27	13.27	30.09
P41567	Eukaryotic translation initiation factor 1 OS=Homo sapiens GN=EIF1 PE=1 SV=1 - [EIF1_HUMAN]	83.19		14.16	28.32	43.36	29.2	40.71	11.5	11.5	12.39	46.02	22.12	12.39				13.27	13.27	29.2	29.2
Q99471	Prefoldin subunit 5 OS=Homo sapiens GN=PFDN5 PE=1 SV=2 - [PFD5_HUMAN]	83.12	12.34		11.69	11.69	4.55	4.55			6.49	16.23	14.94	12.34	9.74	18.18	11.69					9.09
P04350	Tubulin beta-4A chain OS=Homo sapiens GN=TUBB4A PE=1 SV=2 - [TBB4A_HUMAN]	83.11	6.31	22.07	29.73	14.64	23.42	17.34	28.83	30.86	43.47	31.53	36.04	18.47	32.43	9.68	10.36	19.59	21.62	52.03	26.58	36.49
P52788	Spermine synthase OS=Homo sapiens GN=SMS PE=1 SV=2 - [SPSY_HUMAN]	83.06	8.47		11.75	6.83	14.75	24.59	18.85	32.79	23.77	27.05	10.11	4.37	5.46	7.38	4.37	4.37	4.37	13.11	21.58	3.01
P07737	Profilin-1 OS=Homo sapiens GN=PFN1 PE=1 SV=2 - [PROF1_HUMAN]	82.86	22.86	44.29	22.86	5.71	35	12.14	23.57	43.57	27.14	17.86	29.29	31.43	17.86	24.29	34.29	27.14	25.71	37.14	43.57	40
P06733-2	Isoform MBP-1 of Alpha-enolase OS=Homo sapiens GN=ENO1 - [ENOA_HUMAN]	82.7	39	24.93	36.95	27.86	42.52	46.04	26.98	59.24	43.99	36.36	38.12	35.19	51.03	47.21	43.7	58.94	35.48	44.57	27.27	28.74
O75934	Pre-mRNA-splicing factor SPF27 OS=Homo sapiens GN=BCAS2 PE=1 SV=1 - [SPF27_HUMAN]	82.67		12.44	4	4			19.11					5.78		4	5.78	15.56	5.33	12.44	13.33	12.44
P78371	T-complex protein 1 subunit beta OS=Homo sapiens GN=CCT2 PE=1 SV=4 - [TCPB_HUMAN]	82.62	14.95	15.14	18.32	18.32	21.68	19.63	22.8	17.76	23.74	23.93	19.81	19.81	20.19	18.69	11.96	7.85	9.91	15.7	14.95	14.77
Q04760	Lactoylglutathione lyase OS=Homo sapiens GN=GLO1 PE=1 SV=4 - [LGUL_HUMAN]	82.61	13.04	17.93	14.67	9.78	4.35	3.8	3.8	3.8		14.67	14.67	29.89	9.24	15.22	10.87	13.59	10.87	9.24		14.13
H3BVA7	Ubiquitin carboxyl-terminal hydrolase 7 (Fragment) OS=Homo sapiens GN=USP7 PE=4 SV=1 - [H3BVA7_HUMAN]	82.35					82.35
B1ANH0	Guanylate kinase (Fragment) OS=Homo sapiens GN=GUK1 PE=2 SV=1 - [B1ANH0_HUMAN]	82.03			10.6	5.53		5.99			10.14	10.14		4.15		5.07	14.29	10.14	17.97	15.67	15.67	13.82
P62328	Thymosin beta-4 OS=Homo sapiens GN=TMSB4X PE=1 SV=2 - [TYB4_HUMAN]	81.82	25	43.18	43.18	27.27	59.09	79.55	75	61.36				25	43.18	25	25			27.27	54.55	43.18
P29692-3	Isoform 3 of Elongation factor 1-delta OS=Homo sapiens GN=EEF1D - [EF1D_HUMAN]	81.71	27.63	31.13	33.46	26.07	26.85	16.73	12.84		10.12		5.06	18.68	20.62	32.68	32.3	31.91	23.35	10.12	5.06	14.01
P50583	Bis(5'-nucleosyl)-tetraphosphatase [asymmetrical] OS=Homo sapiens GN=NUDT2 PE=1 SV=3 - [AP4A_HUMAN]	81.63		23.13	13.61					4.76	10.2			4.76	9.52	6.8	6.8	16.33	10.2	5.44
P23396	40S ribosomal protein S3 OS=Homo sapiens GN=RPS3 PE=1 SV=2 - [RS3_HUMAN]	81.48	26.75	10.29	10.29	9.88		24.28	7.41	34.57	25.51	17.7	19.34	21.4	29.63	18.52	20.58	14.4	11.11	18.11	4.12	13.17
P08670	Vimentin OS=Homo sapiens GN=VIM PE=1 SV=4 - [VIME_HUMAN]	81.33	15.24	19.96	17.17	13.52	22.32	14.59	19.96	14.81	20.6	14.59	11.16	9.01	13.95	17.38	13.09	22.75	10.09	20.17	36.05	36.48
P13489	Ribonuclease inhibitor OS=Homo sapiens GN=RNH1 PE=1 SV=2 - [RINI_HUMAN]	81.13	8.24	9.54	10.41	2.39	1.95	15.4	17.35	24.08	9.33	11.71	4.56	7.38	12.8	10.2			7.38	19.31	8.68	6.94
P21964-2	Isoform Soluble of Catechol O-methyltransferase OS=Homo sapiens GN=COMT - [COMT_HUMAN]	81	14.48			6.79	6.79	14.03	7.69	14.48	7.24	20.81	20.81	21.72	12.22	10.41	18.1	11.31	7.69		4.52
O00299	Chloride intracellular channel protein 1 OS=Homo sapiens GN=CLIC1 PE=1 SV=4 - [CLIC1_HUMAN]	80.91	8.71	12.86	12.86	3.73	7.47	11.2	11.2	18.67	14.94	19.92	8.71	23.24	8.71	23.24	29.05	29.05	20.33	23.65	13.69	3.73
P11172-2	Isoform 2 of Uridine 5'-monophosphate synthase OS=Homo sapiens GN=UMPS - [UMPS_HUMAN]	80.79		6.62	3.64	10.26	8.94	4.97	19.87	4.97		5.3	5.3		12.58	3.31	18.54	13.91		2.65	2.98	8.94
H3BR68	Fructose-bisphosphate aldolase A (Fragment) OS=Homo sapiens GN=ALDOA PE=4 SV=1 - [H3BR68_HUMAN]	80.77	9.23		8.46		31.54	6.15	60	60	66.92	60.77	43.85	9.23	8.46	6.92	27.69	16.92	16.92	20	8.46
H0YN28	Annexin (Fragment) OS=Homo sapiens GN=ANXA2 PE=2 SV=1 - [H0YN28_HUMAN]	80.58	41.73	13.67	20.14	12.95	29.5	13.67	29.5	32.37	23.02	41.01	28.06	12.23	37.41	30.22	33.09	17.99	43.17	27.34	39.57	20.86
P16152	Carbonyl reductase [NADPH] 1 OS=Homo sapiens GN=CBR1 PE=1 SV=3 - [CBR1_HUMAN]	80.51	9.39	14.44	4.33	5.78	5.78	6.86	9.39	21.66	21.66	16.25	21.3	11.55	13	16.61	10.47	21.66	10.11	2.89	2.89	6.86
Q9NYJ1	Cytochrome c oxidase assembly factor 4 homolog, mitochondrial OS=Homo sapiens GN=COA4 PE=1 SV=2 - [COA4_HUMAN]	80.46		11.49	16.09	17.24					34.48	41.38			24.14					17.24
P04406	Glyceraldehyde-3-phosphate dehydrogenase OS=Homo sapiens GN=GAPDH PE=1 SV=3 - [G3P_HUMAN]	80.3	48.06	47.16	33.43	57.91	41.49	27.76	51.34	61.19	42.09	45.37	56.72	31.34	57.31	45.67	31.94	31.34	41.19	38.81	51.34	53.73
P00492	Hypoxanthine-guanine phosphoribosyltransferase OS=Homo sapiens GN=HPRT1 PE=1 SV=2 - [HPRT_HUMAN]	80.28	5.5	5.96	4.59	4.59		6.42		10.55	20.18	14.22	27.52	11.93	18.35	5.96	11.01	7.34	7.34	32.11	11.01	5.96
E9PQZ1	Elongation factor 1-delta OS=Homo sapiens GN=EEF1D PE=2 SV=1 - [E9PQZ1_HUMAN]	80.25	24.79	23.53	26.05	9.24	15.13	9.24	5.04		10.92		5.46	31.09	17.23	35.29	34.87	34.45	25.21	10.92	5.46	15.13
O95777	N-alpha-acetyltransferase 38, NatC auxiliary subunit OS=Homo sapiens GN=NAA38 PE=1 SV=3 - [NAA38_HUMAN]	80.21	27.08			20.83		7.29		10.42				16.67	10.42	16.67	35.42	25	25			11.46
P06733	Alpha-enolase OS=Homo sapiens GN=ENO1 PE=1 SV=2 - [ENOA_HUMAN]	80.18	40.78	24.65	32.03	26.27	38.71	42.63	35.71	58.53	46.54	38.94	39.86	32.26	48.16	46.54	45.62	53.23	36.64	40.09	30.65	31.8
P62820	Ras-related protein Rab-1A OS=Homo sapiens GN=RAB1A PE=1 SV=3 - [RAB1A_HUMAN]	80	23.41	5.37		7.8	7.8	8.78			11.22	8.78	8.78	14.15	13.66	14.63	9.27	9.27		22.93	23.41	8.29
D6R959	Glutamate--cysteine ligase catalytic subunit (Fragment) OS=Homo sapiens GN=GCLC PE=2 SV=1 - [D6R959_HUMAN]	79.87	7.14	12.99	12.99	9.09	35.71	13.64	27.92	14.29								11.04			5.19
P08758	Annexin A5 OS=Homo sapiens GN=ANXA5 PE=1 SV=2 - [ANXA5_HUMAN]	79.69		11.88	3.44	11.25	20.63	24.06	20.63	16.88	16.56	12.19	13.75	12.5	10.94	20.31	17.5	15.63	15.63	7.19	14.37	14.37
P00558	Phosphoglycerate kinase 1 OS=Homo sapiens GN=PGK1 PE=1 SV=3 - [PGK1_HUMAN]	79.62	26.62	34.77	27.1	23.74	30.94	34.77	32.85	37.65	45.08	38.85	33.81	38.37	47.96	46.04	31.41	49.16	40.05	43.88	34.53	29.5
O60701	UDP-glucose 6-dehydrogenase OS=Homo sapiens GN=UGDH PE=1 SV=1 - [UGDH_HUMAN]	79.55	9.51	13.97	2.23	4.45	6.07	10.53	13.77	15.18	11.54	9.11	14.37	11.94	15.38	15.59	21.66	16.6	11.94	4.05	11.34	10.53
J3KRD5	Cytosolic non-specific dipeptidase (Fragment) OS=Homo sapiens GN=CNDP2 PE=4 SV=1 - [J3KRD5_HUMAN]	79.55	11.36							14.77	14.77			11.36	14.77		18.18			53.41	10.23
P49773	Histidine triad nucleotide-binding protein 1 OS=Homo sapiens GN=HINT1 PE=1 SV=2 - [HINT1_HUMAN]	79.37				38.1	19.84	19.84	20.63	38.89	19.84		25.4			23.81	18.25	16.67	11.11	15.87	7.94	27.78
Q99714	3-hydroxyacyl-CoA dehydrogenase type-2 OS=Homo sapiens GN=HSD17B10 PE=1 SV=3 - [HCD2_HUMAN]	79.31	15.33	17.24	19.54	19.54	38.31	41	26.82	39.85	32.57	36.78	13.79	9.58	13.79	14.18	19.54	4.6	9.2	14.18	4.6	9.58
P10599	Thioredoxin OS=Homo sapiens GN=TXN PE=1 SV=3 - [THIO_HUMAN]	79.05	38.1	20	20.95	11.43	20.95			8.57	11.43			26.67	11.43	8.57		12.38	12.38	37.14	14.29	20
Q9Y5L4	Mitochondrial import inner membrane translocase subunit Tim13 OS=Homo sapiens GN=TIMM13 PE=1 SV=1 - [TIM13_HUMAN]	78.95	16.84	28.42		8.42	8.42				14.74	30.53	30.53		30.53				10.53	10.53	11.58	28.42
Q7Z4H3	HD domain-containing protein 2 OS=Homo sapiens GN=HDDC2 PE=1 SV=1 - [HDDC2_HUMAN]	78.92	8.82				5.88		14.71			6.86	11.27			11.27	26.47	20.59	5.39		4.41	6.37
C9J0K6	Sorcin OS=Homo sapiens GN=SRI PE=2 SV=1 - [C9J0K6_HUMAN]	78.71	14.84				4.52		7.74	5.16		19.35			5.16	7.1	14.84	7.1	14.84	7.74	14.84
P09972	Fructose-bisphosphate aldolase C OS=Homo sapiens GN=ALDOC PE=1 SV=2 - [ALDOC_HUMAN]	78.57	18.68	9.07		8.52	6.32	7.14		13.74	10.99	14.29	18.68	21.98	9.62	10.71	11.81	15.93	18.96	13.46	10.71	9.07
E5RIW3	Tubulin-specific chaperone A OS=Homo sapiens GN=TBCA PE=2 SV=1 - [E5RIW3_HUMAN]	78.57	8.33		9.52	9.52			11.9	11.9				13.1		27.38	32.14	21.43	21.43	26.19	10.71
K7ELV6	Cold-inducible RNA-binding protein (Fragment) OS=Homo sapiens GN=CIRBP PE=4 SV=1 - [K7ELV6_HUMAN]	78.57	62.86									15.71	15.71	30	15.71	30			20
Q08J23-2	Isoform 2 of tRNA (cytosine(34)-C(5))-methyltransferase OS=Homo sapiens GN=NSUN2 - [NSUN2_HUMAN]	78.55	7.92	9.56	5.74	1.5	10.93	15.3	7.92	6.97	8.74	11.07	2.05	13.93		7.79	2.73	4.1	13.8	20.77	14.07	8.61
P29401	Transketolase OS=Homo sapiens GN=TKT PE=1 SV=3 - [TKT_HUMAN]	78.49	25.36	17.82	14.93	16.05	26.97	19.58	18.3	28.25	35.31	32.42	17.01	16.05	38.36	17.34	21.99	9.79	13.8	18.14	8.83	16.37
P19623	Spermidine synthase OS=Homo sapiens GN=SRM PE=1 SV=1 - [SPEE_HUMAN]	78.48	3.31	14.9	16.23	8.61	7.95	14.9	2.65	2.65		8.94	8.94	8.28	22.52					2.65	20.86	22.52
Q13126-4	Isoform 4 of S-methyl-5'-thioadenosine phosphorylase OS=Homo sapiens GN=MTAP - [MTAP_HUMAN]	78.21	2.5	3.57	3.57	5		10.36	6.07	6.07		12.5	28.93		26.43		6.79			14.29	8.21	7.14
P14618	Pyruvate kinase isozymes M1/M2 OS=Homo sapiens GN=PKM PE=1 SV=4 - [KPYM_HUMAN]	78.15	22.22	40.49	37.48	44.07	40.49	42.56	35.78	36.72	42.75	47.83	33.52	27.87	35.59	36.91	39.36	41.43	35.97	43.13	40.68	41.43
P63261	Actin, cytoplasmic 2 OS=Homo sapiens GN=ACTG1 PE=1 SV=1 - [ACTG_HUMAN]	78.13	56.27	35.73	44	37.6	49.6	50.93	46.67	56.53	55.2	61.6	49.33	54.67	35.2	48.53	53.87	48.8	49.6	58.93	43.47	44.27
P05787	Keratin, type II cytoskeletal 8 OS=Homo sapiens GN=KRT8 PE=1 SV=7 - [K2C8_HUMAN]	78.05	13.25	17.18	13.66	15.73	20.08	4.76	10.77	21.53	23.4	20.29	15.11	19.25	10.77	19.88	18.43	18.43	24.22	20.7	7.66	17.6
O75955	Flotillin-1 OS=Homo sapiens GN=FLOT1 PE=1 SV=3 - [FLOT1_HUMAN]	77.99	7.03	11.24	7.73	4.68	10.3	4.68		9.84	15.69	14.99	7.26	3.51	2.58	5.15		5.62	14.52	8.43	10.3	8.9
K7EMS3	Keratin, type I cytoskeletal 19 (Fragment) OS=Homo sapiens GN=KRT19 PE=4 SV=1 - [K7EMS3_HUMAN]	77.9	6.08	12.71	17.13	22.65	7.18	8.84	8.84	13.81	5.52	11.05	13.81	15.47	7.18	15.47	22.1	28.18	28.18	21.55	16.02
P60709	Actin, cytoplasmic 1 OS=Homo sapiens GN=ACTB PE=1 SV=1 - [ACTB_HUMAN]	77.87	60.8	35.73	44	37.6	49.6	50.93	51.2	51.73	55.2	61.6	49.33	59.2	39.73	48.53	53.87	44.27	45.07	58.93	38.93	44.27
O00151	PDZ and LIM domain protein 1 OS=Homo sapiens GN=PDLIM1 PE=1 SV=4 - [PDLI1_HUMAN]	77.81	3.34	4.86		3.65	26.44	27.36	3.65		7.9		4.56	10.94	4.56	3.34		5.17	15.5	19.45	14.89	7.9
Q09666	Neuroblast differentiation-associated protein AHNAK OS=Homo sapiens GN=AHNAK PE=1 SV=2 - [AHNK_HUMAN]	77.74	8.12	11.71	8.85	10.97	12.72	13.06	12.04	14.97	13.19	16.1	11	11.36	11.65	10.83	9.02	9.63	5.86	4.87	3.58	10.65
P62258	14-3-3 protein epsilon OS=Homo sapiens GN=YWHAE PE=1 SV=1 - [1433E_HUMAN]	77.65	33.33	51.76	31.76	24.71	20	16.86	17.25	31.76	10.59	28.63	22.35	22.35	42.35	34.51	38.43	24.71	29.41	36.08	24.31	26.27
O43715	TP53-regulated inhibitor of apoptosis 1 OS=Homo sapiens GN=TRIAP1 PE=1 SV=1 - [TRIA1_HUMAN]	77.63	17.11					17.11						18.42		18.42				30.26	10.53
P42765	3-ketoacyl-CoA thiolase, mitochondrial OS=Homo sapiens GN=ACAA2 PE=1 SV=2 - [THIM_HUMAN]	77.33	2.77	24.18	5.29	13.1	18.14	15.11		22.17	16.62	13.6	23.17	2.77	23.68		3.27	8.31	3.02	13.85	9.32	9.82
H3BU16	Hematological and neurological-expressed 1-like protein (Fragment) OS=Homo sapiens GN=HN1L PE=2 SV=1 - [H3BU16_HUMAN]	77.25		9.58	9.58								15.57	8.38	25.75	25.15	22.16	26.95	8.38
P43034	Platelet-activating factor acetylhydrolase IB subunit alpha OS=Homo sapiens GN=PAFAH1B1 PE=1 SV=2 - [LIS1_HUMAN]	77.07	10.98	7.8	7.8	16.34	8.78	3.9	1.71		5.37	10.73	8.29	11.46	12.2	5.85		9.02	6.34	4.63	2.93	19.51
Q08J23	tRNA (cytosine(34)-C(5))-methyltransferase OS=Homo sapiens GN=NSUN2 PE=1 SV=2 - [NSUN2_HUMAN]	77.05	7.56	9.13	5.48	1.43	10.43	14.6	8.47	6.65	8.34	10.56	4.82	11.6	2.87	7.43	2.61	3.91	13.17	19.82	13.43	8.21
P43686	26S protease regulatory subunit 6B OS=Homo sapiens GN=PSMC4 PE=1 SV=2 - [PRS6B_HUMAN]	77.03	2.39	11.24	20.81	2.39	2.87	13.4	9.33	2.63				3.11	4.78	4.78	4.78	6.94	9.09	5.5	13.88	21.29
P28074-3	Isoform 3 of Proteasome subunit beta type-5 OS=Homo sapiens GN=PSMB5 - [PSB5_HUMAN]	76.88	9.38	3.75	3.75			8.13			13.13	8.13	8.13	9.38		9.38	18.13	39.38	28.75	13.75	22.5
Q9P000	COMM domain-containing protein 9 OS=Homo sapiens GN=COMMD9 PE=1 SV=2 - [COMD9_HUMAN]	76.77			11.62	3.54				11.62	12.63	18.69					10.61	5.05	10.61			13.64
H7BZ18	Multiple coagulation factor deficiency protein 2 (Fragment) OS=Homo sapiens GN=MCFD2 PE=2 SV=1 - [H7BZ18_HUMAN]	76.67					26.67	37.78														38.89
P07355	Annexin A2 OS=Homo sapiens GN=ANXA2 PE=1 SV=2 - [ANXA2_HUMAN]	76.4	26.84	27.43	16.22	16.52	23.3	10.32	22.42	23.6	25.37	30.38	20.35	7.67	38.64	15.04	13.57	7.37	25.37	32.15	32.15	27.73
O43399-2	Isoform 2 of Tumor protein D54 OS=Homo sapiens GN=TPD52L2 - [TPD54_HUMAN]	76.34	8.6	7.53	16.13	16.13	17.74	25.81	40.86	26.88	17.74	5.91	5.91	16.67		15.59	15.59	28.49	7.53	7.53	5.91
Q99497	Protein DJ-1 OS=Homo sapiens GN=PARK7 PE=1 SV=2 - [PARK7_HUMAN]	76.19	3.7	15.87	11.64	4.23	5.82	16.4	16.4	20.63	28.57	3.7	3.7	4.76	7.94	20.63		4.76	22.75	30.69	16.4	12.17
P48739	Phosphatidylinositol transfer protein beta isoform OS=Homo sapiens GN=PITPNB PE=1 SV=2 - [PIPNB_HUMAN]	76.01	3.32	7.01	4.43	4.43	4.43	4.43	24.72			13.28	19.56	2.95		9.59	9.59		2.95	21.77	21.4
P20290-2	Isoform 2 of Transcription factor BTF3 OS=Homo sapiens GN=BTF3 - [BTF3_HUMAN]	75.93	17.28					25.31	25.31	13.58	14.2		3.7	24.07		6.17	6.17	6.17				22.22
Q9BYN0	Sulfiredoxin-1 OS=Homo sapiens GN=SRXN1 PE=1 SV=2 - [SRXN1_HUMAN]	75.91							15.33	17.52	17.52				10.95		11.68	11.68	6.57	6.57	13.87	7.3
Q06830	Peroxiredoxin-1 OS=Homo sapiens GN=PRDX1 PE=1 SV=1 - [PRDX1_HUMAN]	75.88	24.62	45.23	25.63	35.68	28.64	16.08	19.1	45.73	35.18	37.69	39.2	35.68	38.69	54.27	23.62	42.71	39.7	41.21	28.64	55.78
P51149	Ras-related protein Rab-7a OS=Homo sapiens GN=RAB7A PE=1 SV=1 - [RAB7A_HUMAN]	75.85		9.66	12.08	8.7	14.98	14.98	18.84	24.15	6.76	19.32	19.32		14.49	5.31	5.31	4.83		26.09	15.94	9.66
P17987	T-complex protein 1 subunit alpha OS=Homo sapiens GN=TCP1 PE=1 SV=1 - [TCPA_HUMAN]	75.72	12.05	34.17	10.25	5.4	3.78	3.96	1.98	9.35	13.31	15.29	14.39	7.37	21.94	6.83	13.31	5.4	3.6	15.83	23.92	37.05
G3V1R4	NOL1/NOP2/Sun domain family, member 2, isoform CRA_b OS=Homo sapiens GN=NSUN2 PE=2 SV=1 - [G3V1R4_HUMAN]	75.52	1.32	13.18	7.91	2.07	8.47	11.11	10.92	6.59	8.47	8.85		4.52		10.73	3.77	1.32	11.86	24.11	14.69	9.98
Q9BSY4	Coiled-coil-helix-coiled-coil-helix domain-containing protein 5 OS=Homo sapiens GN=CHCHD5 PE=1 SV=1 - [CHCH5_HUMAN]	75.45	9.09				16.36	42.73	26.36	13.64					9.09						23.64
E7ERH2	S-phase kinase-associated protein 1 (Fragment) OS=Homo sapiens GN=SKP1 PE=2 SV=1 - [E7ERH2_HUMAN]	75.35				9.15	9.15			10.56	5.63	15.49	9.86			35.92	28.17		20.42		6.34
Q9Y281	Cofilin-2 OS=Homo sapiens GN=CFL2 PE=1 SV=1 - [COF2_HUMAN]	75.3	10.24	16.27		13.25	4.82	6.63	7.23		16.27	16.27	18.67	22.29	18.67	10.24		10.24	10.84	12.05	8.43	6.63
P68104	Elongation factor 1-alpha 1 OS=Homo sapiens GN=EEF1A1 PE=1 SV=1 - [EF1A1_HUMAN]	75.11	32.47	31.82	22.08	21.21	26.84	41.13	27.06	34.2	40.91	32.47	34.85	17.53	42.21	30.3	35.28	38.1	40.91	40.69	30.52	26.41
P10809	60 kDa heat shock protein, mitochondrial OS=Homo sapiens GN=HSPD1 PE=1 SV=2 - [CH60_HUMAN]	75.04	10.82	9.95	12.91	15.36	28.27	29.32	29.84	38.39	34.21	20.59	15.53	14.49	24.61	22.51	28.8	27.23	36.47	20.07	25.65	14.14
O43852-2	Isoform 2 of Calumenin OS=Homo sapiens GN=CALU - [CALU_HUMAN]	74.92	11.11	16.83	18.41	17.14	7.94		8.57	18.1	25.71	21.27	21.27	11.11	23.81	7.62	15.56	28.57	14.92	14.29	7.3	6.98
Q15365	Poly(rC)-binding protein 1 OS=Homo sapiens GN=PCBP1 PE=1 SV=2 - [PCBP1_HUMAN]	74.72	7.02	11.8	21.63	9.83	10.11	18.82	6.74	7.58	2.25	5.62	19.94	21.35	19.94	8.71	16.01	23.6	13.48	13.48	15.73	14.04
Q9Y696	Chloride intracellular channel protein 4 OS=Homo sapiens GN=CLIC4 PE=1 SV=4 - [CLIC4_HUMAN]	74.7	2.77		5.53	22.13	7.11	15.42	6.72	4.74	7.11	9.09	11.86	4.74	12.25	14.62	8.7	8.7			5.14	5.14
Q92979	Ribosomal RNA small subunit methyltransferase NEP1 OS=Homo sapiens GN=EMG1 PE=1 SV=4 - [NEP1_HUMAN]	74.59						6.15		5.74	4.51	20.49	9.43	6.56	4.51		9.02	4.1		23.77	12.3
P50991	T-complex protein 1 subunit delta OS=Homo sapiens GN=CCT4 PE=1 SV=4 - [TCPD_HUMAN]	74.58	13.73	19.11	9.65	16.51	14.84	20.78	15.21	10.2	10.39	13.36	18	5.94	10.95	14.47	11.5	14.66	6.31	18.74	10.02	7.42
Q9NQT5	Exosome complex component RRP40 OS=Homo sapiens GN=EXOSC3 PE=1 SV=3 - [EXOS3_HUMAN]	74.55	8.36		5.09					5.45	5.45	5.82		7.64	12.36	2.91	18.91		7.27	5.45	18.91
G3V2Y4	Serine hydroxymethyltransferase (Fragment) OS=Homo sapiens GN=SHMT2 PE=2 SV=1 - [G3V2Y4_HUMAN]	74.36	20.94	7.26	7.26		13.25	10.68	3.42	5.98	25.21	6.41		13.68	14.96	13.68	12.82	22.22	18.38	13.25	7.26	13.68
H0YGA2	Ubiquitin-conjugating enzyme E2 D4 (Fragment) OS=Homo sapiens GN=UBE2D4 PE=2 SV=1 - [H0YGA2_HUMAN]	74.36		28.21												46.15	46.15
P55072	Transitional endoplasmic reticulum ATPase OS=Homo sapiens GN=VCP PE=1 SV=4 - [TERA_HUMAN]	74.32	13.15	3.72	5.83	6.45	17.62	12.66	13.03	14.27	14.39	12.03	12.41	8.31	13.03	12.03	9.06	8.56	15.14	17.99	14.52	10.79
E5RJI7	39S ribosomal protein L13, mitochondrial (Fragment) OS=Homo sapiens GN=MRPL13 PE=2 SV=1 - [E5RJI7_HUMAN]	74.32		10.14	10.14					10.81		16.89	4.73		18.92					6.76	12.84	10.14
F5H780	Thioredoxin reductase 1, cytoplasmic OS=Homo sapiens GN=TXNRD1 PE=2 SV=1 - [F5H780_HUMAN]	74.29	5.01	9.8	13.29	3.49	3.49		2.4	17.21	12.2	11.98		3.27		19.61	12.42	18.3	19.17	6.75	11.76	7.41
Q8TDQ7	Glucosamine-6-phosphate isomerase 2 OS=Homo sapiens GN=GNPDA2 PE=1 SV=1 - [GNPI2_HUMAN]	74.28	6.16		6.16			10.87	14.13	8.33		7.25	3.62	3.26		6.16	6.16			9.42	10.51
P21266	Glutathione S-transferase Mu 3 OS=Homo sapiens GN=GSTM3 PE=1 SV=3 - [GSTM3_HUMAN]	74.22	16.44	13.78	21.78	5.33	11.56	4	12	6.22	5.33		3.56	21.78	10.22	11.56	11.56	9.78	7.56	11.11	11.56	6.22
E5RHG8	Transcription elongation factor B polypeptide 1 (Fragment) OS=Homo sapiens GN=TCEB1 PE=2 SV=1 - [E5RHG8_HUMAN]	74.16	11.24			10.11	48.31	38.2	15.73								13.48	13.48	13.48	34.83	15.73
Q9Y5J7	Mitochondrial import inner membrane translocase subunit Tim9 OS=Homo sapiens GN=TIMM9 PE=1 SV=1 - [TIM9_HUMAN]	74.16		16.85	16.85		12.36						17.98	12.36	16.85	12.36	17.98	26.97	26.97			16.85
P30041	Peroxiredoxin-6 OS=Homo sapiens GN=PRDX6 PE=1 SV=3 - [PRDX6_HUMAN]	74.11	15.63	33.93	4.02	19.2	18.75	16.52	24.11	20.54	30.36	32.14	45.54	31.25	46.88	38.39	22.32	31.25	4.91	39.29	34.38	22.32
P30044-2	Isoform Cytoplasmic+peroxisomal of Peroxiredoxin-5, mitochondrial OS=Homo sapiens GN=PRDX5 - [PRDX5_HUMAN]	74.07	20.37	9.88	16.67	17.28	27.78	24.69	40.74	22.84	9.88			13.58	15.43	13.58	4.94	16.05	16.05	4.94	4.94	16.67
P29692-4	Isoform 4 of Elongation factor 1-delta OS=Homo sapiens GN=EEF1D - [EF1D_HUMAN]	74.05	22.52	21.37	23.66	8.4	13.74	8.4	4.58		9.92		4.96	18.32	15.65	32.06	31.68	31.3	22.9	20.99	16.03	13.74
P84077	ADP-ribosylation factor 1 OS=Homo sapiens GN=ARF1 PE=1 SV=2 - [ARF1_HUMAN]	74.03	14.36	9.94			13.26	7.73	11.05	16.02	17.13	5.52	35.36	8.29	23.2	24.31		6.08	4.42	22.65	4.42
P61204	ADP-ribosylation factor 3 OS=Homo sapiens GN=ARF3 PE=1 SV=2 - [ARF3_HUMAN]	74.03	14.36	9.94			13.26	7.73	16.57	11.05	17.13	5.52	35.36	8.29	23.2	24.31		6.08	4.42	22.65	4.42	4.97
P31939	Bifunctional purine biosynthesis protein PURH OS=Homo sapiens GN=ATIC PE=1 SV=3 - [PUR9_HUMAN]	73.99	4.22	8.95	10.47	12.33	7.09	8.28	2.87	6.76	10.14	14.02	13.85	9.29	11.66	6.42	14.19	6.76	2.03	6.42	8.95	8.28
P06576	ATP synthase subunit beta, mitochondrial OS=Homo sapiens GN=ATP5B PE=1 SV=3 - [ATPB_HUMAN]	73.91	15.31	23.06	17.58	7.75	4.73	12.85	22.31	29.3	12.48	16.82	9.64	11.91	16.64	17.01	21.74	22.31	21.17	20.79	17.39	15.12
P07954-2	Isoform Cytoplasmic of Fumarate hydratase, mitochondrial OS=Homo sapiens GN=FH - [FUMH_HUMAN]	73.88	7.28	13.7	7.28	13.7	23.98	17.99	14.35	19.91		1.71	2.57	1.93	16.06	9.85	19.27	23.13	1.5	8.57	8.14	13.7
P14550	Alcohol dehydrogenase [NADP(+)] OS=Homo sapiens GN=AKR1A1 PE=1 SV=3 - [AK1A1_HUMAN]	73.85		7.69	4.31	14.77	3.08	2.46	2.46	17.85	9.85	8	8.92	16.92	8	5.85	5.54	13.54	11.08	6.46	15.08	7.69
P13797	Plastin-3 OS=Homo sapiens GN=PLS3 PE=1 SV=4 - [PLST_HUMAN]	73.81	10.48	17.3	10.16	9.05	13.81	7.62	18.1	9.84	21.11	12.54	16.03	11.27	19.05	7.78	12.06	14.29	5.87	10.32	14.76	12.7
P30086	Phosphatidylethanolamine-binding protein 1 OS=Homo sapiens GN=PEBP1 PE=1 SV=3 - [PEBP1_HUMAN]	73.8	28.34	29.41	18.18		13.9	13.9	9.63	18.72	30.48	27.81	22.99	11.23	25.67	6.95		4.28		54.01	21.93	7.49
Q99417	C-Myc-binding protein OS=Homo sapiens GN=MYCBP PE=1 SV=3 - [MYCBP_HUMAN]	73.79					16.5	16.5	16.5	19.42	35.92	19.42	8.74	10.68		6.8			22.33
P50395	Rab GDP dissociation inhibitor beta OS=Homo sapiens GN=GDI2 PE=1 SV=2 - [GDIB_HUMAN]	73.71	3.37	10.11	8.54	12.13	21.35	21.35	17.75	21.35	7.64	11.91	13.48	7.87	5.17	10.56	2.02	6.74	8.99	10.79	16.4	12.13
P18669	Phosphoglycerate mutase 1 OS=Homo sapiens GN=PGAM1 PE=1 SV=2 - [PGAM1_HUMAN]	73.62	24.8	21.26	7.09	31.5	21.65	29.92	25.2	27.56	29.53	18.11	26.77	24.41	27.17	27.95	4.72	5.51		20.87	8.27
G5EA52	Protein disulfide isomerase family A, member 3, isoform CRA_b OS=Homo sapiens GN=PDIA3 PE=2 SV=1 - [G5EA52_HUMAN]	73.4	4.95	13.2	11.34	11.34	8.87	11.55	23.51	36.7	20.82	30.1	13.61	14.64	11.96	11.13	8.66	7.63	21.44	16.91	16.08	22.06
P46926	Glucosamine-6-phosphate isomerase 1 OS=Homo sapiens GN=GNPDA1 PE=1 SV=1 - [GNPI1_HUMAN]	73.36			5.88		8.3	9.34	3.81	3.81		11.07	15.92	4.84	15.92	5.88	5.88			14.19	10.03
O43852	Calumenin OS=Homo sapiens GN=CALU PE=1 SV=2 - [CALU_HUMAN]	73.33	11.11	12.06	19.68	23.17	13.97	6.03	8.57	19.05	35.56	24.13	19.37	11.11	19.37	7.62	15.56	16.83	17.78	16.83	13.33	6.98
Q99832	T-complex protein 1 subunit eta OS=Homo sapiens GN=CCT7 PE=1 SV=2 - [TCPH_HUMAN]	73.3	11.6	20.99	14	5.71	3.5	4.97	10.5	17.68	5.89	1.66	6.08	9.39	8.47	11.97	17.31	14.36	11.97	6.45	11.97	23.39
O43399	Tumor protein D54 OS=Homo sapiens GN=TPD52L2 PE=1 SV=2 - [TPD54_HUMAN]	73.3	7.77	6.8	14.56	14.56	16.02	17.48	31.07	24.27	16.02	9.22	11.65	15.05	6.31	14.08	14.08	25.73	6.8	6.8	5.34
P51808	Dynein light chain Tctex-type 3 OS=Homo sapiens GN=DYNLT3 PE=1 SV=1 - [DYLT3_HUMAN]	73.28		20.69											43.97				8.62	8.62
Q6FI81-3	Isoform 3 of Anamorsin OS=Homo sapiens GN=CIAPIN1 - [CPIN1_HUMAN]	73.24	20.07	11.37				5.69	5.69	4.35	5.35			7.36	5.02	5.02	19.73	15.05	17.73	12.37	4.01	8.7
O43707	Alpha-actinin-4 OS=Homo sapiens GN=ACTN4 PE=1 SV=2 - [ACTN4_HUMAN]	73.22	11.09	16.25	15.81	14.38	20.97	19.54	19.21	17.45	15.81	7.57	3.4	14.49	13.5	18.33	15.48	13.83	11.53	11.2	15.37	14.38
P34932	Heat shock 70 kDa protein 4 OS=Homo sapiens GN=HSPA4 PE=1 SV=4 - [HSP74_HUMAN]	73.21	20	7.86	7.26	5.24	3.21	4.52	4.17	7.38	8.45	4.64	11.67	8.57	15.71	13.57	18.33	12.14	14.05	8.69	7.62	10.95
P33316-2	Isoform 2 of Deoxyuridine 5'-triphosphate nucleotidohydrolase, mitochondrial OS=Homo sapiens GN=DUT - [DUT_HUMAN]	73.17	11.59	17.68	17.07	7.93	15.24	8.54	8.54	8.54	8.54	15.85	33.54		17.68	7.32			18.29	31.71	26.83	7.93
Q9Y3F4	Serine-threonine kinase receptor-associated protein OS=Homo sapiens GN=STRAP PE=1 SV=1 - [STRAP_HUMAN]	73.14	6.29	14.57	24.86	15.71	8.57		4.86	16.86	14.29	9.14	7.43	14.57	7.43	16.86	2.29	3.71	6	4.29	9.71	2.86
P15121	Aldose reductase OS=Homo sapiens GN=AKR1B1 PE=1 SV=3 - [ALDR_HUMAN]	73.1	18.35		22.15	29.11	16.14	24.68	23.1	21.2	15.82	14.87	18.35	15.19	9.18	11.71	10.76	13.92	20.25	14.87	8.23	4.75
P61457	Pterin-4-alpha-carbinolamine dehydratase OS=Homo sapiens GN=PCBD1 PE=1 SV=2 - [PHS_HUMAN]	73.08				19.23		8.65					15.38			13.46			22.12	19.23	6.73
P21291	Cysteine and glycine-rich protein 1 OS=Homo sapiens GN=CSRP1 PE=1 SV=3 - [CSRP1_HUMAN]	73.06	12.44			11.4	11.4	15.54	11.4	29.02	20.21	21.76		8.81	13.47	8.81	27.98	23.32	20.21	21.24	7.77
A6NGP5	Hematological and neurological-expressed 1-like protein OS=Homo sapiens GN=HN1L PE=2 SV=2 - [A6NGP5_HUMAN]	73.03	15.17	8.99	8.99								29.78	7.87	24.72	23.6	20.79	25.28	7.87
P08727	Keratin, type I cytoskeletal 19 OS=Homo sapiens GN=KRT19 PE=1 SV=4 - [K1C19_HUMAN]	73	7.25	16	11.75	15.5	6.25	6	6.25	14.75	11	13	22	13.25	14.5	13.75	18.5	26.5	26.5	16.5	17	4.25
P25705-2	Isoform 2 of ATP synthase subunit alpha, mitochondrial OS=Homo sapiens GN=ATP5A1 - [ATPA_HUMAN]	72.96	14.31	8.35	10.54	17.69	15.51	15.11	8.15	17.5	15.9	13.32	14.71	5.96	7.95	18.29	11.13	4.97	6.76	14.91	14.31	10.74
P02545-2	Isoform C of Prelamin-A/C OS=Homo sapiens GN=LMNA - [LMNA_HUMAN]	72.9	11.71	11.89	3.85	3.32	11.89	12.24	18.71	29.72	11.89	14.51	7.17	9.09	16.26	17.13	22.55	23.43	25.17	15.03	11.01	15.03
Q13228	Selenium-binding protein 1 OS=Homo sapiens GN=SELENBP1 PE=1 SV=2 - [SBP1_HUMAN]	72.88	9.75	6.78	4.87	2.75	2.75	9.11	4.87	8.9	2.12	14.19			8.69		5.3	15.47	6.57	4.45	4.87	8.9
Q9BUF5	Tubulin beta-6 chain OS=Homo sapiens GN=TUBB6 PE=1 SV=1 - [TBB6_HUMAN]	72.87	4.26	15.92	12.56	8.74	10.09	6.28	10.31	11.88	18.39	9.19	14.8	9.42	7.4	7.62	14.35	16.82	10.54	15.25	16.59	19.06
P37802	Transgelin-2 OS=Homo sapiens GN=TAGLN2 PE=1 SV=3 - [TAGL2_HUMAN]	72.86	28.64	6.03	11.06	6.03		24.62	21.11	17.09	9.05	9.05		27.14	13.07	21.61	18.09	18.09	37.19	17.59	20.1	15.58
P04083	Annexin A1 OS=Homo sapiens GN=ANXA1 PE=1 SV=2 - [ANXA1_HUMAN]	72.83	24.57		21.68	9.25	9.25	14.74	4.34	2.31	8.38	4.05	5.78	14.16	8.09	16.18	10.98	11.85	27.46	28.61	26.01	20.23
Q09028-4	Isoform 4 of Histone-binding protein RBBP4 OS=Homo sapiens GN=RBBP4 - [RBBP4_HUMAN]	72.82	12.82	4.1	4.1	4.1	17.69			10.51	7.44	5.38		9.74	9.74	11.79	16.41	6.92		3.08		4.1
H7C144	Alpha-actinin-4 (Fragment) OS=Homo sapiens GN=ACTN4 PE=2 SV=1 - [H7C144_HUMAN]	72.81	26.61	3.51	11.99	19.59	19.3	18.71	11.4	9.06	9.06	7.02	5.85	23.39	3.51	31.58	20.18	15.79	13.16	10.82	9.36	6.73
C9J7S3	Aspartate--tRNA ligase, cytoplasmic (Fragment) OS=Homo sapiens GN=DARS PE=2 SV=1 - [C9J7S3_HUMAN]	72.73	8.52	22.73	5.68				14.77	10.23		5.68		3.98	6.25	13.64	8.52			23.3	10.8	5.11
F8W7V3	ATP synthase subunit f, mitochondrial OS=Homo sapiens GN=ATP5J2 PE=2 SV=1 - [F8W7V3_HUMAN]	72.73		20	20	20									27.27	29.09				23.64	43.64
P36952	Serpin B5 OS=Homo sapiens GN=SERPINB5 PE=1 SV=2 - [SPB5_HUMAN]	72.53	5.07	4.8	2.13		11.47	10.4	16.8	6.67	5.33	4		2.4		11.47	18.4	8.8		5.6	12	10.93
H3BSQ5	Ataxin-2-like protein (Fragment) OS=Homo sapiens GN=ATXN2L PE=2 SV=1 - [H3BSQ5_HUMAN]	72.53		16.48		10.99					17.58	28.57	10.99			23.08	9.89
Q15293	Reticulocalbin-1 OS=Homo sapiens GN=RCN1 PE=1 SV=1 - [RCN1_HUMAN]	72.51	3.93	11.78	13.6	17.52	17.52	8.76	4.83	12.08	3.63	11.18	12.39		12.08	5.74	8.46	20.24	10.88	16.62	22.05	21.45
P62140	Serine/threonine-protein phosphatase PP1-beta catalytic subunit OS=Homo sapiens GN=PPP1CB PE=1 SV=3 - [PP1B_HUMAN]	72.48	18.35	6.12	10.09	6.73		4.28	19.88	15.6	13.76	13.15	16.82	8.87	12.54			9.48	9.48	22.63	14.98	6.12
P61289	Proteasome activator complex subunit 3 OS=Homo sapiens GN=PSME3 PE=1 SV=1 - [PSME3_HUMAN]	72.44	10.63	7.09			5.91	12.2	9.45	4.72	23.62	3.54	5.91	14.57	5.91	11.81	13.39	9.45	4.33	5.12	8.27	3.15
P15531	Nucleoside diphosphate kinase A OS=Homo sapiens GN=NME1 PE=1 SV=1 - [NDKA_HUMAN]	72.37	30.92	42.76	23.68	23.68	37.5	44.08	37.5	35.53	19.08	17.11	22.37	37.5	30.26	13.16	25.66	34.87	20.39	34.87	12.5	22.37
P38919	Eukaryotic initiation factor 4A-III OS=Homo sapiens GN=EIF4A3 PE=1 SV=4 - [IF4A3_HUMAN]	72.26	18	7.54	4.87	24.33	6.81	5.84	6.33	7.54	9.98	16.55	23.11	13.63	29.2	9.49	5.35		3.89	7.54	5.84	7.54
P31942	Heterogeneous nuclear ribonucleoprotein H3 OS=Homo sapiens GN=HNRNPH3 PE=1 SV=2 - [HNRH3_HUMAN]	72.25	11.27	11.85	11.56	2.31				1.73	12.14	1.73	1.73	6.07	23.7	10.98	4.91	17.34	11.85	2.31	2.31	15.9
P18085	ADP-ribosylation factor 4 OS=Homo sapiens GN=ARF4 PE=1 SV=3 - [ARF4_HUMAN]	72.22	10.56	18.33	11.67	8.33	3.89	11.67	18.89	15	15.56	5.56	17.78	10	15	16.11		6.11		21.11		8.33
Q04695	Keratin, type I cytoskeletal 17 OS=Homo sapiens GN=KRT17 PE=1 SV=2 - [K1C17_HUMAN]	72.22	13.89	17.59	14.12	10.88	15.74	14.81	17.36	23.84	10.65	11.81	18.75	6.71	26.85	19.21	14.35	23.38	20.37	29.4	28.7	21.06
Q9H3K6	BolA-like protein 2 OS=Homo sapiens GN=BOLA2 PE=1 SV=1 - [BOLA2_HUMAN]	72.09					22.09	22.09	10.47	10.47			10.47	18.6		18.6		18.6	10.47
P61586	Transforming protein RhoA OS=Homo sapiens GN=RHOA PE=1 SV=1 - [RHOA_HUMAN]	72.02	6.22		12.44	12.44	7.77	7.77	15.54				6.22	4.15	6.22	4.15	12.44	27.46	15.03	13.47	16.06	16.06
Q96KP4	Cytosolic non-specific dipeptidase OS=Homo sapiens GN=CNDP2 PE=1 SV=2 - [CNDP2_HUMAN]	72	16.84	8.84		1.68	4.63	4.21		5.05	9.47	5.26	6.11	20	11.16	16	8	6.95		14.32	9.05	10.53
F8WES2	S-methyl-5'-thioadenosine phosphorylase OS=Homo sapiens GN=MTAP PE=2 SV=1 - [F8WES2_HUMAN]	72									16	36	36		20							20
P25398	40S ribosomal protein S12 OS=Homo sapiens GN=RPS12 PE=1 SV=3 - [RS12_HUMAN]	71.97	7.58	16.67	25	31.06	25	17.42	18.94	32.58	40.15	28.79	21.97	8.33	35.61	22.73	14.39	14.39	6.06	13.64	8.33	30.3
P00387-2	Isoform 2 of NADH-cytochrome b5 reductase 3 OS=Homo sapiens GN=CYB5R3 - [NB5R3_HUMAN]	71.94	2.52		4.68	18.71	13.67	24.82	27.34	9.71		11.15	6.83							14.75	18.35	3.96
Q13885	Tubulin beta-2A chain OS=Homo sapiens GN=TUBB2A PE=1 SV=1 - [TBB2A_HUMAN]	71.91	13.71	20	18.65	15.28	18.43	18.88	30.11	31.01	49.66	31.01	40	16.85	20.67	16.4	20.45	26.29	21.12	31.46	11.69	22.25
P54920	Alpha-soluble NSF attachment protein OS=Homo sapiens GN=NAPA PE=1 SV=3 - [SNAA_HUMAN]	71.86	6.1	6.44	3.39	3.39	8.47	20.68	26.44	4.41	6.1	10.85	5.08	9.49		4.75		8.47		4.07		10.85
B7Z2S5	Thioredoxin reductase 1, cytoplasmic OS=Homo sapiens GN=TXNRD1 PE=2 SV=1 - [B7Z2S5_HUMAN]	71.85	4.2	14.63	14.08	7.5	6.76	3.84	2.01	14.44	10.24	10.05		2.74		16.45	10.42	15.36	13.71	3.11	9.87	6.22
Q12904	Aminoacyl tRNA synthase complex-interacting multifunctional protein 1 OS=Homo sapiens GN=AIMP1 PE=1 SV=2 - [AIMP1_HUMAN]	71.79	6.41		3.85	15.06	5.13		6.73	2.88	16.99	21.15	21.47	12.18	12.18	23.08	17.63	5.77	8.33	8.33
J3KTN0	Eukaryotic initiation factor 4A-I (Fragment) OS=Homo sapiens GN=EIF4A1 PE=4 SV=1 - [J3KTN0_HUMAN]	71.79	8.55	10.26	5.98	10.26	10.26	29.06	10.26	44.44	29.06	43.59	56.41	8.55	37.61	29.06	20.51	18.8		38.46	11.11
P05187	Alkaline phosphatase, placental type OS=Homo sapiens GN=ALPP PE=1 SV=2 - [PPB1_HUMAN]	71.78	18.13	18.32	10.65	9.16	10.09	12.52	30.09	27.48	17.57	18.88	19.63	20.93	20.37	25.98	26.17	21.12	20.56	25.23	27.29	34.21
P51148	Ras-related protein Rab-5C OS=Homo sapiens GN=RAB5C PE=1 SV=2 - [RAB5C_HUMAN]	71.76	6.48	21.76	26.85	5.56	5.56	16.67	16.2	16.2	5.09			6.48	6.48	5.56	5.56		6.48	12.96	11.11	21.76
P50990	T-complex protein 1 subunit theta OS=Homo sapiens GN=CCT8 PE=1 SV=4 - [TCPQ_HUMAN]	71.72	5.47	17.15	15.15	18.98	12.04	5.84	9.67	10.77	11.31	16.61	8.76	8.76	13.5	12.23	9.49	14.05	4.74	6.75	10.77	10.77
P61106	Ras-related protein Rab-14 OS=Homo sapiens GN=RAB14 PE=1 SV=4 - [RAB14_HUMAN]	71.63	5.12	5.12		14.42	6.05	6.05		5.12	6.51	12.56	6.98	13.95	33.49	19.07			4.65	11.63	12.09	5.12
H0YDZ7	Guanine deaminase (Fragment) OS=Homo sapiens GN=GDA PE=4 SV=1 - [H0YDZ7_HUMAN]	71.59				19.89	6.82	20.45	5.68			16.48	30.11		18.75					4.55	4.55
Q6GMV3	Putative peptidyl-tRNA hydrolase PTRHD1 OS=Homo sapiens GN=PTRHD1 PE=1 SV=1 - [PTRD1_HUMAN]	71.43	17.86		5.71	10	25	15.71	6.43		27.86			26.43			9.29
Q96B45	UPF0693 protein C10orf32 OS=Homo sapiens GN=C10orf32 PE=1 SV=1 - [CJ032_HUMAN]	71.43	9.52									16.19		28.57					16.19	17.14
P22626	Heterogeneous nuclear ribonucleoproteins A2/B1 OS=Homo sapiens GN=HNRNPA2B1 PE=1 SV=2 - [ROA2_HUMAN]	71.39	21.25	5.67	6.52	7.37	14.45	25.21	30.31	34.84	24.36	25.5	37.68	16.71	26.63	28.33	35.41	30.88	15.01	27.48	22.66	20.4
P48643	T-complex protein 1 subunit epsilon OS=Homo sapiens GN=CCT5 PE=1 SV=1 - [TCPE_HUMAN]	71.35	12.57	13.31	9.61	2.96	1.85	12.57	7.02	22.55	15.53	15.34	16.08	13.31	16.45	15.53	19.78	17.74	17.19	9.24	6.1	7.39
J3KNF8	Cytochrome b5 type B OS=Homo sapiens GN=CYB5B PE=3 SV=1 - [J3KNF8_HUMAN]	71.33	16		8	8	15.33	12.67	21.33	8.67				6		6	15.33		34.67	22.67
F8VZJ2	Nascent polypeptide-associated complex subunit alpha OS=Homo sapiens GN=NACA PE=2 SV=1 - [F8VZJ2_HUMAN]	71.32		10.29	19.85	10.29			5.15	5.15					10.29	11.03	20.59	9.56	25.74	25.74		10.29
P35221	Catenin alpha-1 OS=Homo sapiens GN=CTNNA1 PE=1 SV=1 - [CTNA1_HUMAN]	71.3	9.6	5.08	5.41	1.43	5.19	5.3	10.04	9.82	5.63	10.15	3.09	3.53	3.09	7.62	2.21	3.86	5.96	9.05	10.04	5.19
Q5JYR4	Dolichyl-diphosphooligosaccharide--protein glycosyltransferase subunit 2 (Fragment) OS=Homo sapiens GN=RPN2 PE=2 SV=1 - [Q5JYR4_HUMAN]	71.26		10.78		7.19	7.19		7.19	7.19			13.77		13.77			17.37	17.37	23.95	38.92	27.54
Q14019	Coactosin-like protein OS=Homo sapiens GN=COTL1 PE=1 SV=3 - [COTL1_HUMAN]	71.13	11.97	8.45	23.94	26.06	26.06	8.45	4.93		11.27	11.27	11.27	23.24	9.15	17.61	5.63	4.93		6.34	6.34	8.45
O43414-3	Isoform 3 of ERI1 exoribonuclease 3 OS=Homo sapiens GN=ERI3 - [ERI3_HUMAN]	71.09		14.84	23.44	6.25		7.03	7.03					8.59	5.47				5.47
P12814	Alpha-actinin-1 OS=Homo sapiens GN=ACTN1 PE=1 SV=2 - [ACTN1_HUMAN]	71.08	9.64	9.3	7.4	11.55	15.36	15.36	12.89	5.04	9.64	10.99	10.2	8.74	7.29	10.65	6.5	14.91	11.32	8.97	13.57	8.3
Q15847	Adipogenesis regulatory factor OS=Homo sapiens GN=ADIRF PE=1 SV=1 - [ADIRF_HUMAN]	71.05	28.95	40.79	40.79			19.74														18.42
K7EK63	ATP synthase subunit alpha OS=Homo sapiens GN=ATP5A1 PE=3 SV=1 - [K7EK63_HUMAN]	71.05	10.47	7.13	9.58	13.14	12.92	16.93	9.13	19.6	17.82	14.92	16.48	6.68	8.91	17.15	8.91	6.24	6.01	16.7	12.69	9.8
P78346	Ribonuclease P protein subunit p30 OS=Homo sapiens GN=RPP30 PE=1 SV=1 - [RPP30_HUMAN]	70.9	19.78		6.34	8.58	5.22					5.6		19.4		7.46	22.01	9.7		6.34	2.99
F5GZQ4	L-lactate dehydrogenase A chain (Fragment) OS=Homo sapiens GN=LDHA PE=2 SV=1 - [F5GZQ4_HUMAN]	70.83	52.78	23.61	23.61	18.06			20.83	20.83		12.5	20.83	23.61	23.61	23.61	41.67	41.67		23.61	23.61	23.61
P11586	C-1-tetrahydrofolate synthase, cytoplasmic OS=Homo sapiens GN=MTHFD1 PE=1 SV=3 - [C1TC_HUMAN]	70.8	9.73	10.48	7.7	6.42	9.84	9.41	8.45	9.52	13.48	10.37	7.27	4.81	8.88	1.71	3.85	4.6	4.28	11.66	8.66	11.98
E7EUI8	Glucose-6-phosphate 1-dehydrogenase (Fragment) OS=Homo sapiens GN=G6PD PE=2 SV=1 - [E7EUI8_HUMAN]	70.8	7.08	2.95	6.78	4.72	15.63	2.95	10.91	15.34	12.68	7.37	5.01	5.6	7.96	7.96	11.21	14.45	17.4	5.9	12.98	5.6
Q99653	Calcineurin B homologous protein 1 OS=Homo sapiens GN=CHP1 PE=1 SV=3 - [CHP1_HUMAN]	70.77				6.15	6.67	6.67			4.1	21.54	13.33	9.23				5.64		10.26	10.26	4.62
P61019	Ras-related protein Rab-2A OS=Homo sapiens GN=RAB2A PE=1 SV=1 - [RAB2A_HUMAN]	70.75			14.15	6.6			7.08	19.81	27.36	16.51				5.19	5.19	5.19	18.87	11.79	6.13
P32119	Peroxiredoxin-2 OS=Homo sapiens GN=PRDX2 PE=1 SV=5 - [PRDX2_HUMAN]	70.71	4.04	5.05	5.05	15.15	11.11	13.13	4.55		9.09		5.56	4.04	24.75	18.69	23.74	31.82	31.82	31.82	19.7	30.3
Q9BVJ7	Dual specificity protein phosphatase 23 OS=Homo sapiens GN=DUSP23 PE=1 SV=1 - [DUS23_HUMAN]	70.67				9.33	19.33				5.33	8.67	7.33		7.33			5.33		8
P54577	Tyrosine--tRNA ligase, cytoplasmic OS=Homo sapiens GN=YARS PE=1 SV=4 - [SYYC_HUMAN]	70.64	19.51	10.42	10.8	8.52	11.55	18.56	13.64	1.52	8.9	10.61	6.06	8.33	11.36	14.02	15.72	14.39	15.91	28.98	12.31	9.66
B4DL37	Aldo-keto reductase family 1 member C3 OS=Homo sapiens GN=AKR1C3 PE=2 SV=1 - [B4DL37_HUMAN]	70.59	9.8						9.8	9.8			28.43	6.37	25.98	14.22	7.84	7.84	7.84	20.1
C9J4Z3	60S ribosomal protein L37a OS=Homo sapiens GN=RPL37A PE=2 SV=1 - [C9J4Z3_HUMAN]	70.59		26.47	26.47		38.24	26.47	26.47	44.12	17.65	17.65	17.65	11.76	45.59		11.76	11.76		11.76	13.24	26.47
E9PSH0	CUGBP Elav-like family member 1 (Fragment) OS=Homo sapiens GN=CELF1 PE=2 SV=1 - [E9PSH0_HUMAN]	70.53			16.84	16.84					8.42	13.68			14.74		17.89		12.63
P23381	Tryptophan--tRNA ligase, cytoplasmic OS=Homo sapiens GN=WARS PE=1 SV=2 - [SYWC_HUMAN]	70.49		6.58	3.82	2.12	5.1	10.62	5.94	8.49	18.9	22.93	11.46	2.97	4.88	1.27	15.92	22.08	19.75	15.5	13.38	2.76
Q12906	Interleukin enhancer-binding factor 3 OS=Homo sapiens GN=ILF3 PE=1 SV=3 - [ILF3_HUMAN]	70.47	4.03	3.91	6.82	7.05	3.24	3.8	12.42	19.13	15.21	11.63	8.72	7.83	12.3	5.37	4.92	6.82	7.61	6.26	7.49	7.05
P09651-3	Isoform 2 of Heterogeneous nuclear ribonucleoprotein A1 OS=Homo sapiens GN=HNRNPA1 - [ROA1_HUMAN]	70.41	17.98	8.61	6.74	18.73	44.94	43.82	44.94	49.44	50.19	38.58	38.2	19.48	25.47	23.97	27.72	9.74	14.23	15.36	14.61	3
P04080	Cystatin-B OS=Homo sapiens GN=CSTB PE=1 SV=2 - [CYTB_HUMAN]	70.41		12.24	12.24		12.24		24.49	24.49			21.43		21.43			12.24	12.24	12.24	24.49	36.73
O75369-6	Isoform 6 of Filamin-B OS=Homo sapiens GN=FLNB - [FLNB_HUMAN]	70.4	4.26	8.12	5.87	13.99	16.4	11.27	10.48	10.13	6.82	6.35	10.37	6.31	7.49	7.09	4.73	6.98	10.8	12.06	10.29	5.24
K7ELW5	Polypyrimidine tract-binding protein 1 (Fragment) OS=Homo sapiens GN=PTBP1 PE=4 SV=1 - [K7ELW5_HUMAN]	70.39	20.6	3.43		5.15	46.78	21.89	16.74	16.74	25.32		8.15	27.04	11.59	21.46	8.58	21.46	24.89	3.43	11.59	3.43
Q9BQE3	Tubulin alpha-1C chain OS=Homo sapiens GN=TUBA1C PE=1 SV=1 - [TBA1C_HUMAN]	70.38	23.83	22.94	4.01	8.69	22.72	38.53	23.39	29.18	43.88	26.06	27.39	21.6	35.41	23.16	18.71	21.38	16.26	36.75	22.72	20.27
O43504	Ragulator complex protein LAMTOR5 OS=Homo sapiens GN=LAMTOR5 PE=1 SV=1 - [LTOR5_HUMAN]	70.33					21.98	21.98				37.36	21.98				10.99			15.38
P68366	Tubulin alpha-4A chain OS=Homo sapiens GN=TUBA4A PE=1 SV=1 - [TBA4A_HUMAN]	70.31	22.77	27.46	6.92	4.46	18.75	20.09	17.41	20.09	32.14	17.41	20.31	15.63	21.88	20.09	11.83	25.45	17.41	30.36	18.97	27.9
P54136	Arginine--tRNA ligase, cytoplasmic OS=Homo sapiens GN=RARS PE=1 SV=2 - [SYRC_HUMAN]	70.3	7.73	10.61	9.7	11.82	3.18	7.73	12.27	7.88	11.52	12.27	5.15	8.18	10.61	13.03	10.76	8.03	7.58	9.39	7.73	16.36
F8W1A4	Adenylate kinase 2, mitochondrial OS=Homo sapiens GN=AK2 PE=2 SV=1 - [F8W1A4_HUMAN]	70.26	6.9	16.38	6.9	4.74		11.21	11.21	10.34	13.79	28.02	19.4	12.93	22.84	6.03	7.33	13.79	15.52	10.34	10.34	6.9
P24666	Low molecular weight phosphotyrosine protein phosphatase OS=Homo sapiens GN=ACP1 PE=1 SV=3 - [PPAC_HUMAN]	70.25	11.39		13.92			15.19		7.59	7.59	8.23	6.96	11.39	22.78		8.23		5.7	5.7	5.7
P54136-2	Isoform Monomeric of Arginine--tRNA ligase, cytoplasmic OS=Homo sapiens GN=RARS - [SYRC_HUMAN]	70.24	8.67	10.37	7.65	11.39	3.57	8.67	13.78	8.84	12.93	10.03	5.78	9.18	9.01	14.63	12.07	9.01	9.69	10.54	5.27	11.73
P24534	Elongation factor 1-beta OS=Homo sapiens GN=EEF1B2 PE=1 SV=3 - [EF1B_HUMAN]	70.22	15.56	9.78	9.78	20.89	20.89	20.89		8		18.67	8	18.67		8		28.44	31.56	5.78		6.67
J3KT51	Hematological and neurological-expressed 1 protein OS=Homo sapiens GN=HN1 PE=4 SV=1 - [J3KT51_HUMAN]	70.19	9.62						23.08	23.08		24.04	24.04	9.62			14.42			31.73	31.73
Q02790	Peptidyl-prolyl cis-trans isomerase FKBP4 OS=Homo sapiens GN=FKBP4 PE=1 SV=3 - [FKBP4_HUMAN]	70.15	12.64	7.41	12.42	13.73	22	19.83	17.86	9.59	16.34	8.06	10.24	11.55	11.55	6.32	8.5	11.11	9.15	7.19	13.73	10.24
H7C2K6	Band 4.1-like protein 1 (Fragment) OS=Homo sapiens GN=EPB41L1 PE=4 SV=1 - [H7C2K6_HUMAN]	70.15		8.96	3.73		8.58		14.18	4.48	4.48	10.82					6.72			10.07	24.63	11.94
Q9Y224	UPF0568 protein C14orf166 OS=Homo sapiens GN=C14orf166 PE=1 SV=1 - [CN166_HUMAN]	70.08	8.2	6.15	6.56	6.56	3.28	4.1			15.98	15.16	11.07	7.79	17.21	7.79	6.56	10.25	13.52	20.08	13.52	8.2
Q16401-2	Isoform 2 of 26S proteasome non-ATPase regulatory subunit 5 OS=Homo sapiens GN=PSMD5 - [PSMD5_HUMAN]	70.07	3.69	2.82	6.94	4.12	6.29	11.28	4.99	5.42	4.77	6.51	8.46	2.82	6.94	7.81			8.03	5.21
O43447	Peptidyl-prolyl cis-trans isomerase H OS=Homo sapiens GN=PPIH PE=1 SV=1 - [PPIH_HUMAN]	70.06	33.33	7.91	5.08		5.08	5.65		4.52	9.04			6.78		7.34		3.39		12.43	4.52	7.91
P07741	Adenine phosphoribosyltransferase OS=Homo sapiens GN=APRT PE=1 SV=2 - [APT_HUMAN]	70	12.78	18.89		6.11	5.56	15.56		10	18.33	10	14.44		18.89	7.22	14.44	7.22	8.33	12.78	12.78	12.78
P82909	28S ribosomal protein S36, mitochondrial OS=Homo sapiens GN=MRPS36 PE=1 SV=2 - [RT36_HUMAN]	69.9	33.01			12.62	12.62	11.65						27.18	15.53	15.53				12.62	12.62
K7ENT6	Tropomyosin alpha-4 chain (Fragment) OS=Homo sapiens GN=TPM4 PE=4 SV=1 - [K7ENT6_HUMAN]	69.83	8.94	5.03	18.44	24.58	6.15	20.11	11.17	6.15		16.2	17.32		17.88			16.76	13.97	7.82		5.03
P12277	Creatine kinase B-type OS=Homo sapiens GN=CKB PE=1 SV=1 - [KCRB_HUMAN]	69.82	18.9	17.32	7.61	7.61	2.62	14.17	9.97	19.42	4.46	7.09	26.77	4.2	20.73	16.01	7.09	7.61	14.44	34.65	39.11	36.75
H3BM67	Nucleolar protein 3 (Fragment) OS=Homo sapiens GN=NOL3 PE=2 SV=1 - [H3BM67_HUMAN]	69.78			7.19	7.19	7.19				5.76		18.71		18.71	27.34	13.67			14.39	10.07
P05783	Keratin, type I cytoskeletal 18 OS=Homo sapiens GN=KRT18 PE=1 SV=2 - [K1C18_HUMAN]	69.77	32.09	16.05	3.72	12.33	6.05	19.3	16.98	21.86	29.3	29.3	34.42	28.84	39.77	19.53	23.49	23.02	28.37	26.51	14.42	13.26
G5E9M5	Interleukin enhancer binding factor 3, 90kDa, isoform CRA_b OS=Homo sapiens GN=ILF3 PE=2 SV=1 - [G5E9M5_HUMAN]	69.71	4.01	8.91	6.79	7.02	3.23	3.79	6.9	13.59	15.14	11.58	8.69	7.8	12.25	5.35	4.9	6.79	7.57	6.24	7.46	12.03
P43490	Nicotinamide phosphoribosyltransferase OS=Homo sapiens GN=NAMPT PE=1 SV=1 - [NAMPT_HUMAN]	69.65	4.89	12.83	9.78	3.67		2.04	15.07	16.9	11.41	3.05	11.61	6.52	18.53	6.92	6.92		7.94	15.48	12.42	8.55
P61604	10 kDa heat shock protein, mitochondrial OS=Homo sapiens GN=HSPE1 PE=1 SV=2 - [CH10_HUMAN]	69.61	35.29	13.73	21.57	6.86	25.49	18.63	21.57	35.29	35.29	35.29	23.53	42.16	35.29	20.59		33.33	21.57	21.57	21.57	29.41
Q16555	Dihydropyrimidinase-related protein 2 OS=Homo sapiens GN=DPYSL2 PE=1 SV=1 - [DPYL2_HUMAN]	69.58	8.74	14.34	12.41	2.8	2.1	5.59	3.5	4.55	6.29	18.53	6.12	8.39	7.69			8.22	11.01	9.79	9.27	4.72
Q9NQR4	Omega-amidase NIT2 OS=Homo sapiens GN=NIT2 PE=1 SV=1 - [NIT2_HUMAN]	69.57	6.16		2.54		12.68		3.99	9.42	15.94	10.51	18.48	6.16		10.51	17.75		6.52	5.43	5.43	3.62
H7C3T4	Peroxiredoxin-4 (Fragment) OS=Homo sapiens GN=PRDX4 PE=4 SV=1 - [H7C3T4_HUMAN]	69.57	20.5	19.25	14.29	19.88	11.8	6.83			13.04	4.97	4.97	31.68	19.25	36.02	13.66		8.07	20.5	13.04	19.25
O75947	ATP synthase subunit d, mitochondrial OS=Homo sapiens GN=ATP5H PE=1 SV=3 - [ATP5H_HUMAN]	69.57		6.21	19.25	5.59	20.5	6.21	6.21		6.21	6.21		9.94		9.94	17.39			18.63	18.63
P31327	Carbamoyl-phosphate synthase [ammonia], mitochondrial OS=Homo sapiens GN=CPS1 PE=1 SV=2 - [CPSM_HUMAN]	69.53	12.93	14.93	11.07	7.47	8.07	15	13.07	11.87	17.27	12.47	14.4	9.53	15.6	14.8	12.67	15.13	19.4	17.93	14.47	18.6
A8MUB1	Tubulin alpha-4A chain OS=Homo sapiens GN=TUBA4A PE=2 SV=1 - [A8MUB1_HUMAN]	69.52	23.56	19.63	7.16	4.62	19.4	20.79	18.01	20.79	38.8	18.01	21.02	16.17	22.63	20.79	12.24	26.33	18.01	31.41	19.63	28.87
D6RIT2	Heterogeneous nuclear ribonucleoprotein H (Fragment) OS=Homo sapiens GN=HNRNPH1 PE=2 SV=1 - [D6RIT2_HUMAN]	69.51			4.88	14.63	37.8	29.27	37.2	29.27	11.59	18.29	18.29	20.12	23.17	29.88	8.54	17.07		4.88	16.46
P61086	Ubiquitin-conjugating enzyme E2 K OS=Homo sapiens GN=UBE2K PE=1 SV=3 - [UBE2K_HUMAN]	69.5	5.5	13.5	13.5				9.5		8.5	5	9	17	14.5	5.5		17.5	14		7.5	6
P68036	Ubiquitin-conjugating enzyme E2 L3 OS=Homo sapiens GN=UBE2L3 PE=1 SV=1 - [UB2L3_HUMAN]	69.48	5.84	9.74				16.23				20.13	15.58	11.69	15.58	37.66	25.97	14.29		9.74		9.74
P13984	General transcription factor IIF subunit 2 OS=Homo sapiens GN=GTF2F2 PE=1 SV=2 - [T2FB_HUMAN]	69.48		11.24	14.46	3.61	3.61		3.21	9.64	8.03	14.86	4.02			4.42	7.63			6.43	6.43	11.24
Q9UBI6	Guanine nucleotide-binding protein G(I)/G(S)/G(O) subunit gamma-12 OS=Homo sapiens GN=GNG12 PE=1 SV=3 - [GBG12_HUMAN]	69.44		9.72		25		22.22	15.28		19.44	19.44										9.72
Q9Y678	Coatomer subunit gamma-1 OS=Homo sapiens GN=COPG1 PE=1 SV=1 - [COPG1_HUMAN]	69.34	5.72	4.92	1.95	5.95	8.24	8.92	9.27	5.95	5.26	12.47	7.21	10.98	3.43	3.09	8.24	3.89		6.18	2.86	6.64
Q9Y3D0	Mitotic spindle-associated MMXD complex subunit MIP18 OS=Homo sapiens GN=FAM96B PE=1 SV=1 - [MIP18_HUMAN]	69.33	13.5			12.88										13.5		12.88			16.56
P11413	Glucose-6-phosphate 1-dehydrogenase OS=Homo sapiens GN=G6PD PE=1 SV=4 - [G6PD_HUMAN]	69.32	4.66	4.08	4.47	3.11	15.73	9.51	13.79	16.7	11.26	4.85	3.3	3.69	9.32	9.13	11.26	15.34	18.64	3.88	13.2	4.27
P61970	Nuclear transport factor 2 OS=Homo sapiens GN=NUTF2 PE=1 SV=1 - [NTF2_HUMAN]	69.29	12.6		11.02	11.02			6.3		6.3	24.41	17.32	21.26	30.71	21.26	21.26
C0H5Y7	BAK1 protein OS=Homo sapiens GN=BAK1 PE=2 SV=1 - [C0H5Y7_HUMAN]	69.28		16.34	23.53	7.19			22.22	22.22			16.34	7.84	6.54							6.54
H0YKT8	Proteasome subunit beta type (Fragment) OS=Homo sapiens GN=PSMA4 PE=2 SV=1 - [H0YKT8_HUMAN]	69.23	3.85	14.29	8.79	19.23	13.19			12.09				3.85	14.29	4.95			19.23	19.23	8.79	14.29
P27695	DNA-(apurinic or apyrimidinic site) lyase OS=Homo sapiens GN=APEX1 PE=1 SV=2 - [APEX1_HUMAN]	69.18	22.96	5.66	8.49	11.64	8.49		7.55	14.47			7.23	20.75	18.87	9.43	11.32	11.32	11.64	8.18		5.66
P62330	ADP-ribosylation factor 6 OS=Homo sapiens GN=ARF6 PE=1 SV=2 - [ARF6_HUMAN]	69.14		11.43								8.57	8.57		15.43	5.71	21.14	6.29	18.29	6.29	6.29	11.43
B7Z6A8	Mycophenolic acid acyl-glucuronide esterase, mitochondrial OS=Homo sapiens GN=ABHD10 PE=2 SV=1 - [B7Z6A8_HUMAN]	69.13	7.38	30.2	11.41	11.41		7.38		10.07					24.16						7.38	11.41
O00244	Copper transport protein ATOX1 OS=Homo sapiens GN=ATOX1 PE=1 SV=1 - [ATOX1_HUMAN]	69.12	11.76			25	25	54.41		26.47	26.47							13.24	13.24
P50151	Guanine nucleotide-binding protein G(I)/G(S)/G(O) subunit gamma-10 OS=Homo sapiens GN=GNG10 PE=1 SV=1 - [GBG10_HUMAN]	69.12	26.47							26.47	38.24	38.24
O75369-8	Isoform 8 of Filamin-B OS=Homo sapiens GN=FLNB - [FLNB_HUMAN]	69.05	4.1	7.82	6.38	13.18	16.41	10.86	10.1	9.76	6.57	6.11	10.98	6.61	8.55	6.84	4.56	6.72	10.41	11.62	9.91	5.05
Q12905	Interleukin enhancer-binding factor 2 OS=Homo sapiens GN=ILF2 PE=1 SV=2 - [ILF2_HUMAN]	68.97	6.41	16.67	25.38	8.97	12.31	12.56	9.74	18.21	12.31	12.56	4.36	4.36	21.03	6.92	8.97	8.72		6.67	20	19.49
O95433	Activator of 90 kDa heat shock protein ATPase homolog 1 OS=Homo sapiens GN=AHSA1 PE=1 SV=1 - [AHSA1_HUMAN]	68.93	5.92	7.69	7.69	5.62		7.4			6.21	2.07	5.62	22.19	8.28	11.54	6.51	6.51		13.02	9.17	3.55
P30043	Flavin reductase (NADPH) OS=Homo sapiens GN=BLVRB PE=1 SV=3 - [BLVRB_HUMAN]	68.93	7.28		7.28			9.22	9.22	9.22	40.29	15.53	20.39	7.28	7.28	7.28	25.73	25.73	18.93	7.28
P62072	Mitochondrial import inner membrane translocase subunit Tim10 OS=Homo sapiens GN=TIMM10 PE=1 SV=1 - [TIM10_HUMAN]	68.89	7.78		7.78	16.67			21.11	21.11				14.44		14.44		15.56	15.56		31.11	31.11
P08729	Keratin, type II cytoskeletal 7 OS=Homo sapiens GN=KRT7 PE=1 SV=5 - [K2C7_HUMAN]	68.87	17.06	26.65	25.37	17.06	15.35	8.53	10.66	15.78	15.35	17.48	17.06	19.83	19.83	26.01	22.81	24.31	16.2	10.02	10.45	27.72
P61981	14-3-3 protein gamma OS=Homo sapiens GN=YWHAG PE=1 SV=2 - [1433G_HUMAN]	68.83	18.62	7.29	10.53	10.12	3.24	6.88	10.93	7.29	15.38	7.29	11.74	14.98	14.98	4.05	17	15.79	21.46	25.91	11.74
P28074	Proteasome subunit beta type-5 OS=Homo sapiens GN=PSMB5 PE=1 SV=3 - [PSB5_HUMAN]	68.82	9.51	6.08	7.22		4.94		4.94	8.75	16.73	13.69	13.69	10.65	3.8	20.15	24.33	37.26	28.14	17.11	22.43	6.84
Q13813-3	Isoform 3 of Spectrin alpha chain, non-erythrocytic 1 OS=Homo sapiens GN=SPTAN1 - [SPTN1_HUMAN]	68.8	6.97	10.64	5.59	7.06	6.85	6	5.91	7.22	9.75	7.67	7.54	5.71	14.44	7.18	9.05	6.73	5.91	9.38	7.67	9.58
P13639	Elongation factor 2 OS=Homo sapiens GN=EEF2 PE=1 SV=4 - [EF2_HUMAN]	68.76	19.23	16.67	14.92	17.83	21.21	24.24	18.53	22.73	17.6	14.1	11.54	11.31	19.35	13.99	19.35	12.35	12.35	14.8	15.38	17.25
P56211	cAMP-regulated phosphoprotein 19 OS=Homo sapiens GN=ARPP19 PE=1 SV=2 - [ARP19_HUMAN]	68.75	9.82						8.04	8.04							15.18	22.32	9.82	9.82	23.21	13.39
E9PIZ6	Protein kinase C and casein kinase substrate in neurons protein 3 (Fragment) OS=Homo sapiens GN=PACSIN3 PE=2 SV=1 - [E9PIZ6_HUMAN]	68.75							35.42	35.42												33.33
Q96C90	Protein phosphatase 1 regulatory subunit 14B OS=Homo sapiens GN=PPP1R14B PE=1 SV=3 - [PP14B_HUMAN]	68.71	16.33			19.05				13.61	13.61	13.61	13.61		16.33	14.97	14.97		17.01			17.69
Q9Y2V2	Calcium-regulated heat stable protein 1 OS=Homo sapiens GN=CARHSP1 PE=1 SV=2 - [CHSP1_HUMAN]	68.71		10.88	15.65							24.49	32.65		35.37			7.48	7.48	23.81	25.85	10.88
K7EJH8	Alpha-actinin-4 (Fragment) OS=Homo sapiens GN=ACTN4 PE=4 SV=1 - [K7EJH8_HUMAN]	68.68	14.29	25.82	11.54		23.08	30.77	29.67	14.84	20.33	5.49		5.49	23.08	9.89	9.89	9.89	8.79	8.79	21.98	16.48
E7ETZ0	Calmodulin OS=Homo sapiens GN=CALM1 PE=2 SV=1 - [E7ETZ0_HUMAN]	68.67	14.67		11.33	21.33	26	11.33	11.33	11.33	13.33	36.67	35.33	14.67	10.67	36.67	13.33	28	4.67	10.67	7.33
H0YAS6	Polyadenylate-binding protein 1 (Fragment) OS=Homo sapiens GN=PABPC1 PE=4 SV=1 - [H0YAS6_HUMAN]	68.64	3.55	13.02			24.26	14.2	14.2		8.88	27.81	22.49		9.47						9.47	9.47
P13693	Translationally-controlled tumor protein OS=Homo sapiens GN=TPT1 PE=1 SV=1 - [TCTP_HUMAN]	68.6	20.35	7.56	7.56	7.56	15.7	23.26	8.14	7.56	15.12	34.88	31.4	16.28	51.74					7.56		7.56
P84095	Rho-related GTP-binding protein RhoG OS=Homo sapiens GN=RHOG PE=1 SV=1 - [RHOG_HUMAN]	68.59	5.76	5.76	5.24	5.24	9.95	14.14	4.19	23.04	29.32			14.66	5.76	19.37	4.71		27.23	24.08	7.33
O00571	ATP-dependent RNA helicase DDX3X OS=Homo sapiens GN=DDX3X PE=1 SV=3 - [DDX3X_HUMAN]	68.58	8.31	12.24	8.16	6.95	5.74	1.66	6.95	11.33	5.14	12.39	9.82	6.5	4.53	5.74	10.73	9.37	16.62	15.26	16.16	10.88
Q9NPJ3	Acyl-coenzyme A thioesterase 13 OS=Homo sapiens GN=ACOT13 PE=1 SV=1 - [ACO13_HUMAN]	68.57		9.29	25.71	15.71	15.71	8.57									24.29	24.29	24.29		6.43	9.29
Q13404-8	Isoform 6 of Ubiquitin-conjugating enzyme E2 variant 1 OS=Homo sapiens GN=UBE2V1 - [UB2V1_HUMAN]	68.57			19.05	9.52				7.62				6.67		20	20		8.57	6.67
P17980	26S protease regulatory subunit 6A OS=Homo sapiens GN=PSMC3 PE=1 SV=3 - [PRS6A_HUMAN]	68.56	13.9	14.35	8.2	9.79	11.85	16.4	5.47	2.73		2.73	7.06	12.3	7.74	1.59	6.83	4.33	10.25	7.52	9.34	17.08
P61247	40S ribosomal protein S3a OS=Homo sapiens GN=RPS3A PE=1 SV=2 - [RS3A_HUMAN]	68.56	16.67	8.71	18.56	3.03	4.92	7.58	11.36	17.42	13.26	15.91	16.29	4.92	9.09	12.88	7.58	7.95	7.95	21.59	9.09	6.82
P60981	Destrin OS=Homo sapiens GN=DSTN PE=1 SV=3 - [DEST_HUMAN]	68.48	19.39	17.58	18.18	7.27	7.27	12.73						15.15	3.64	15.15	7.27	23.64	5.45		24.24	24.85
Q9BT78	COP9 signalosome complex subunit 4 OS=Homo sapiens GN=COPS4 PE=1 SV=1 - [CSN4_HUMAN]	68.47	12.07	6.9		1.72		1.72	12.81	9.11	9.11			15.76	2.46	11.33	7.64	7.88	3.2	1.72		11.08
P26038	Moesin OS=Homo sapiens GN=MSN PE=1 SV=3 - [MOES_HUMAN]	68.46	15.25	12.65	1.56	4.33	11.61	11.79	10.23	12.65	14.56	20.97	12.31	19.76	15.25	18.02	6.59	8.32	8.49	17.16	7.97	15.6
E7EQ69	N-alpha-acetyltransferase 50 OS=Homo sapiens GN=NAA50 PE=2 SV=1 - [E7EQ69_HUMAN]	68.45	13.1			5.95	5.95		5.95		7.74	20.83		30.36					15.48	6.55	5.36	7.74
P49368	T-complex protein 1 subunit gamma OS=Homo sapiens GN=CCT3 PE=1 SV=4 - [TCPG_HUMAN]	68.44	20	13.21	6.79	4.95	6.79	8.62	1.83	7.16	19.08	8.44	10.09	17.06	14.5	10.09	9.72	12.48	10.64	11.74	12.84	19.27
Q9HB71	Calcyclin-binding protein OS=Homo sapiens GN=CACYBP PE=1 SV=2 - [CYBP_HUMAN]	68.42	15.35	12.72	11.84	20.61	12.72	3.95	3.95	24.12	22.81	9.21		4.82	13.16	16.23	14.91	9.65		13.6	13.6	12.72
Q9BUB1	PRKAR2A protein OS=Homo sapiens GN=PRKAR2A PE=2 SV=1 - [Q9BUB1_HUMAN]	68.32	8.9	11.78	5.76	7.59	5.24	7.33			3.93	6.81	6.81	8.38	2.62	6.02		3.14		2.62	8.64	7.33
B7Z528	Succinyl-CoA:3-ketoacid coenzyme A transferase 1, mitochondrial OS=Homo sapiens GN=OXCT1 PE=2 SV=1 - [B7Z528_HUMAN]	68.29	18.7		9.76				7.32	5.69				19.51	9.76	26.02	17.07	17.07
O00264	Membrane-associated progesterone receptor component 1 OS=Homo sapiens GN=PGRMC1 PE=1 SV=3 - [PGRC1_HUMAN]	68.21	8.72				15.9	15.9		7.69		3.08	7.18	15.9	4.1	27.69	15.9		4.62	13.33
P62136	Serine/threonine-protein phosphatase PP1-alpha catalytic subunit OS=Homo sapiens GN=PPP1CA PE=1 SV=1 - [PP1A_HUMAN]	68.18	22.73	6.06	6.06	2.73	13.03	14.24	9.7	15.45	13.64	8.18	5.15	11.52	5.76	4.24	3.33	12.73	12.73	18.48	7.58	10.3
Q8WUH6	UPF0444 transmembrane protein C12orf23 OS=Homo sapiens GN=C12orf23 PE=1 SV=1 - [CL023_HUMAN]	68.1	38.79			22.41	22.41			17.24		17.24	27.59	12.93				13.79
Q13813-2	Isoform 2 of Spectrin alpha chain, non-erythrocytic 1 OS=Homo sapiens GN=SPTAN1 - [SPTN1_HUMAN]	68.07	6.9	10.54	5.53	6.98	6.78	5.93	5.85	7.15	9.65	6.86	6.74	5.65	13.56	7.11	8.96	6.66	5.85	8.6	8.2	10.86
P40926	Malate dehydrogenase, mitochondrial OS=Homo sapiens GN=MDH2 PE=1 SV=3 - [MDHM_HUMAN]	68.05	8.88	21.6	16.57	15.98	16.86	16.86	19.53	11.24	19.23	12.13	8.58	6.8	9.17	10.65	15.09	11.83	19.82	17.16	11.54	15.09
H0Y3G3	Serpin B6 (Fragment) OS=Homo sapiens GN=SERPINB6 PE=3 SV=1 - [H0Y3G3_HUMAN]	67.96	6.63				3.31	19.34	11.05	4.97	4.42	8.29	8.29	6.63					8.29	8.29		12.71
Q15366	Poly(rC)-binding protein 2 OS=Homo sapiens GN=PCBP2 PE=1 SV=1 - [PCBP2_HUMAN]	67.95	10.68	3.84	5.21	5.21	3.01	11.51	9.59	14.79	6.85	8.49	12.33	30.96	3.84	9.86	5.48	24.38	4.38	12.33	14.52	6.03
P00374	Dihydrofolate reductase OS=Homo sapiens GN=DHFR PE=1 SV=2 - [DYR_HUMAN]	67.91		9.63	9.63		5.35		9.63			8.56	12.83			20.86	13.9		4.28	5.35
P30050	60S ribosomal protein L12 OS=Homo sapiens GN=RPL12 PE=1 SV=1 - [RL12_HUMAN]	67.88	16.97	26.67	9.7	9.7	18.79	32.73	23.03	18.79		11.52	11.52	26.06	26.67	9.09	14.55	23.64		15.15	5.45	9.7
Q13907	Isopentenyl-diphosphate Delta-isomerase 1 OS=Homo sapiens GN=IDI1 PE=1 SV=2 - [IDI1_HUMAN]	67.84		5.29		13.66		8.81	4.85		8.37		11.45		9.69		19.82	9.69			13.22
P62158	Calmodulin OS=Homo sapiens GN=CALM1 PE=1 SV=2 - [CALM_HUMAN]	67.79	14.77		11.41	21.48	26.17	20.13	20.13	20.13	13.42	36.91	25.5	14.77	10.74	36.91	22.15	28.19	4.7	10.74	7.38	20.13
Q96DI7	U5 small nuclear ribonucleoprotein 40 kDa protein OS=Homo sapiens GN=SNRNP40 PE=1 SV=1 - [SNR40_HUMAN]	67.79		8.12	3.08	3.08	7.84	3.36	8.68	7.84			11.76	7.56		7.28	2.8	5.04		7.84	2.8	4.2
P00338	L-lactate dehydrogenase A chain OS=Homo sapiens GN=LDHA PE=1 SV=2 - [LDHA_HUMAN]	67.77	49.1	19.28	18.98	18.37	10.84	25.3	22.59	7.83	29.22	15.66	22.29	23.8	20.18	31.63	22.29	16.57	14.76	28.61	33.43	45.48
Q9Y5K5-2	Isoform 2 of Ubiquitin carboxyl-terminal hydrolase isozyme L5 OS=Homo sapiens GN=UCHL5 - [UCHL5_HUMAN]	67.72		10.44	6.96	6.96	7.91	10.76	7.91	5.06	5.06	11.08	6.01			4.43	9.81	16.14	10.76	6.65	10.76	11.08
Q9NXG2	THUMP domain-containing protein 1 OS=Homo sapiens GN=THUMPD1 PE=1 SV=2 - [THUM1_HUMAN]	67.71	6.8	6.23	4.82	6.8	17	17.56	11.33	9.35			8.5	3.12	15.86	7.08		2.55			5.38	3.97
Q15366-3	Isoform 3 of Poly(rC)-binding protein 2 OS=Homo sapiens GN=PCBP2 - [PCBP2_HUMAN]	67.68	6.35	3.87	8.56	5.25	3.04	11.6	9.67	14.92	6.91	8.56	12.43	26.8	3.87	5.52	13.81	24.86	4.42	12.43	17.96	9.39
Q92905	COP9 signalosome complex subunit 5 OS=Homo sapiens GN=COPS5 PE=1 SV=4 - [CSN5_HUMAN]	67.66	10.78	2.4	2.4	3.89	4.49	6.89	8.38	5.69	2.1				21.56	6.29	9.28	3.59	2.99	6.89	3.29	8.68
Q15366-6	Isoform 6 of Poly(rC)-binding protein 2 OS=Homo sapiens GN=PCBP2 - [PCBP2_HUMAN]	67.59	6.37	3.88	8.59	5.26	3.05	11.63	9.7	14.96	6.93	8.59	12.47	26.87	3.88	5.54	5.54	24.65	4.43	12.47	18.01	9.42
E9PC52	Histone-binding protein RBBP7 OS=Homo sapiens GN=RBBP7 PE=2 SV=1 - [E9PC52_HUMAN]	67.55	3.85	8.41	3.85	5.29	12.74		12.98	9.13	10.82	18.99	13.94	1.68	5.29	2.16	6.49	16.83	2.88			8.41
O43681	ATPase ASNA1 OS=Homo sapiens GN=ASNA1 PE=1 SV=2 - [ASNA_HUMAN]	67.53	6.03				12.36	4.6	2.59	2.59	6.03	12.64	16.38		15.8	3.74	11.78		6.61	7.47	4.6
O00429-4	Isoform 3 of Dynamin-1-like protein OS=Homo sapiens GN=DNM1L - [DNM1L_HUMAN]	67.53	6.58	1.43	7.58	5.44	8.44	8.44	2.43	7.58	3.58	8.73	7.44	4.01	5.72	3	5.87	8.87	4.86	9.73	6.87	11.87
P50238	Cysteine-rich protein 1 OS=Homo sapiens GN=CRIP1 PE=1 SV=3 - [CRIP1_HUMAN]	67.53		9.09											10.39				36.36	48.05	48.05
O00567	Nucleolar protein 56 OS=Homo sapiens GN=NOP56 PE=1 SV=4 - [NOP56_HUMAN]	67.51	5.89	7.07	7.07	1.68	3.7	9.09	13.3	6.9	6.9	8.59	11.45	9.43	13.3	13.47	3.87	3.03	5.39	9.93	4.71	9.26
P02545	Prelamin-A/C OS=Homo sapiens GN=LMNA PE=1 SV=1 - [LMNA_HUMAN]	67.47	14.16	12.2	7.38	6.93	6.33	9.19	14.76	29.67	18.83	19.13	14.76	11.9	20.03	18.83	23.49	24.25	25.75	17.02	9.49	12.95
P25705	ATP synthase subunit alpha, mitochondrial OS=Homo sapiens GN=ATP5A1 PE=1 SV=1 - [ATPA_HUMAN]	67.45	15.37	9.95	9.58	16.09	14.1	13.74	7.41	18.26	14.47	12.12	15.73	7.78	9.58	16.64	10.13	6.87	4.88	13.56	15.37	12.12
P14854	Cytochrome c oxidase subunit 6B1 OS=Homo sapiens GN=COX6B1 PE=1 SV=2 - [CX6B1_HUMAN]	67.44		13.95	13.95		20.93	30.23	20.93	44.19						9.3	9.3
Q99873-4	Isoform 4 of Protein arginine N-methyltransferase 1 OS=Homo sapiens GN=PRMT1 - [ANM1_HUMAN]	67.42	3.68	19.55	13.6	7.37	3.97	13.03	10.76	5.67	4.25	4.25	11.33	3.68	14.16	4.53	13.6	8.78	20.4	30.03	5.67	8.78
P21333-2	Isoform 2 of Filamin-A OS=Homo sapiens GN=FLNA - [FLNA_HUMAN]	67.41	12.73	13.94	11.1	11.52	9.93	12.09	12.28	12.96	13.38	12.24	11.03	10.31	16.22	13.3	13.76	12.69	13.72	20.92	15.31	13.64
O14818	Proteasome subunit alpha type-7 OS=Homo sapiens GN=PSMA7 PE=1 SV=1 - [PSA7_HUMAN]	67.34	11.29	6.05		5.65	13.31	18.95	34.68	17.34	21.37	12.9		11.29	10.48	8.87				20.97	10.48	10.48
P62979	Ubiquitin-40S ribosomal protein S27a OS=Homo sapiens GN=RPS27A PE=1 SV=2 - [RS27A_HUMAN]	67.31	24.36	25.64	38.46	41.67	22.44	9.62	33.97	31.41	12.82		12.18	19.87		21.79	21.79	18.59	36.54	26.28	14.1	15.38
P00966	Argininosuccinate synthase OS=Homo sapiens GN=ASS1 PE=1 SV=2 - [ASSY_HUMAN]	67.23	10.92	22.09	16.99	25.49		8.5	6.31	3.16	15.05	17.96	14.56	7.04	25.97	7.04	4.61	6.31	1.94	3.88	5.58	13.11
P28482	Mitogen-activated protein kinase 1 OS=Homo sapiens GN=MAPK1 PE=1 SV=3 - [MK01_HUMAN]	67.22	15.28	11.11	7.78	13.33	6.94	4.44		5.28	9.17	4.44	6.39	6.94	6.39	6.67	6.67	3.89	2.5	2.5	3.33	12.78
P50454	Serpin H1 OS=Homo sapiens GN=SERPINH1 PE=1 SV=2 - [SERPH_HUMAN]	67.22	5.74	14.35	7.18	7.89	12.44	24.64	8.85	17.7	9.81	10.05	2.63	9.81	12.44	8.37	10.29	15.55	30.38	7.18	14.35	17.46
Q5JR08	Rho-related GTP-binding protein RhoC (Fragment) OS=Homo sapiens GN=RHOC PE=2 SV=1 - [Q5JR08_HUMAN]	67.2	6.35		12.7	19.05	7.94	7.94	15.87				6.35	4.23	6.35	4.23		8.99	8.99	20.11	29.1	16.4
O00429	Dynamin-1-like protein OS=Homo sapiens GN=DNM1L PE=1 SV=2 - [DNM1L_HUMAN]	67.12	3.13	1.36	7.2	5.16	8.02	8.02	2.31	7.2	3.4	8.29	10.19	3.8	2.31	5.84	8.56	5.57	4.62	9.24	6.52	11.28
P62249	40S ribosomal protein S16 OS=Homo sapiens GN=RPS16 PE=1 SV=2 - [RS16_HUMAN]	67.12		17.81	6.85	6.85		5.48	20.55	12.33	6.85	14.38	7.53	13.01	17.81	26.71				6.85	6.85	6.85
P24941	Cyclin-dependent kinase 2 OS=Homo sapiens GN=CDK2 PE=1 SV=2 - [CDK2_HUMAN]	67.11	3.02	12.42		5.37	10.74		8.72	23.83				3.02	6.71	4.36	3.36	3.02	3.36			8.39
C9JFK9	BAG family molecular chaperone regulator 3 (Fragment) OS=Homo sapiens GN=BAG3 PE=2 SV=1 - [C9JFK9_HUMAN]	67.08	8.31	5.23	3.69			3.08	10.15	7.08	4.62	8	11.69	6.46	10.15	3.08	3.08			5.85	3.69	8.92
H0YI31	Ubiquitin carboxyl-terminal hydrolase 15 (Fragment) OS=Homo sapiens GN=USP15 PE=4 SV=1 - [H0YI31_HUMAN]	67.08	11.67		13.33	13.33		19.58	3.75	4.58	4.17	4.17	4.17	6.67	7.92	3.75	3.33	6.67			7.92
B5MC59	Replication protein A 14 kDa subunit OS=Homo sapiens GN=RPA3 PE=2 SV=1 - [B5MC59_HUMAN]	67.07	12.2	14.63		19.51		10.98						12.2	14.63		20.73			20.73
P63098	Calcineurin subunit B type 1 OS=Homo sapiens GN=PPP3R1 PE=1 SV=2 - [CANB1_HUMAN]	67.06								5.88	17.06			10				10.59	10.59	7.06	21.76	10.59
P49588	Alanine--tRNA ligase, cytoplasmic OS=Homo sapiens GN=AARS PE=1 SV=2 - [SYAC_HUMAN]	67.05	8.06	8.47	7.95	5.17	8.06	13.33	15.29	12.6	5.89	14.98	11.67	11.78	16.12	11.88	6.82	10.54	11.16	19.83	20.25	8.47
P26641	Elongation factor 1-gamma OS=Homo sapiens GN=EEF1G PE=1 SV=3 - [EF1G_HUMAN]	67.05	16.02	19.91	5.72	2.29	6.86	20.14	20.14	15.56	15.56	15.56	11.21	9.84	10.3	10.53	10.07	15.56	15.56	6.86	10.07	11.21
P01116-2	Isoform 2B of GTPase KRas OS=Homo sapiens GN=KRAS - [RASK_HUMAN]	67.02			7.98		6.38		5.85	5.85				13.83		18.62	28.72				13.3	13.3
P00505	Aspartate aminotransferase, mitochondrial OS=Homo sapiens GN=GOT2 PE=1 SV=3 - [AATM_HUMAN]	66.98	4.19	10	5.35	3.02	13.26	14.19	11.16	13.26	13.02	20.47	19.77	14.42	13.49	5.35	7.44	5.12	5.12	2.79	6.05	14.19
P35249	Replication factor C subunit 4 OS=Homo sapiens GN=RFC4 PE=1 SV=2 - [RFC4_HUMAN]	66.94	4.13		11.29	4.68	13.22	14.05	3.03		3.31	3.31	11.57	10.19	18.18	3.86	10.19		2.75	8.26
P53999	Activated RNA polymerase II transcriptional coactivator p15 OS=Homo sapiens GN=SUB1 PE=1 SV=3 - [TCP4_HUMAN]	66.93	16.54			4.72	7.09				18.11	21.26	22.05	36.22	11.02	25.2	25.2	23.62	7.09
P08195-3	Isoform 3 of 4F2 cell-surface antigen heavy chain OS=Homo sapiens GN=SLC3A2 - [4F2_HUMAN]	66.9	12.15	9.86	17.96	10.56	14.61	18.49	14.44	10.92	26.58	19.72	11.8	11.8	19.72	3.17		8.98	11.8	14.96	13.56	10.21
P31150	Rab GDP dissociation inhibitor alpha OS=Homo sapiens GN=GDI1 PE=1 SV=2 - [GDIA_HUMAN]	66.89	5.82	2.46	2.01	2.01	2.91	10.74	11.86	6.49	9.4	19.91	7.61	4.47	5.59	9.4	12.53	19.02	17.23	11.19	8.72	2.46
P62263	40S ribosomal protein S14 OS=Homo sapiens GN=RPS14 PE=1 SV=3 - [RS14_HUMAN]	66.89		6.62	6.62	29.14	13.91	28.48	16.56	8.61		23.84		7.28	8.61	33.77	7.28	17.22	8.61	8.61	8.61	6.62
Q9UJZ1	Stomatin-like protein 2, mitochondrial OS=Homo sapiens GN=STOML2 PE=1 SV=1 - [STML2_HUMAN]	66.85	9.83	7.3	4.21	4.21	4.78	8.15	16.57	6.74		3.65		7.87	4.21	8.15	19.94	18.26	9.27	12.64	20.51	15.17
M0QZM1	Heterogeneous nuclear ribonucleoprotein M (Fragment) OS=Homo sapiens GN=HNRNPM PE=4 SV=1 - [M0QZM1_HUMAN]	66.84	11.23	17.75	10.7		7.57	7.57	8.09	10.97	10.44	6.53	1.83	3.66	10.97		13.58	15.93	10.18	11.49	16.71	19.32
P04632	Calpain small subunit 1 OS=Homo sapiens GN=CAPNS1 PE=1 SV=1 - [CPNS1_HUMAN]	66.79	8.21				5.97	9.7	18.66	35.07	3.36	8.58	8.58	5.6	4.85		8.96
Q99873-3	Isoform 3 of Protein arginine N-methyltransferase 1 OS=Homo sapiens GN=PRMT1 - [ANM1_HUMAN]	66.76	3.79	20.12	13.99	7.58	4.08	13.41	11.08	5.83	4.37	4.37	11.66	3.79	14.58	4.66	13.99	9.04	11.95	21.87	12.24	9.04
Q01082	Spectrin beta chain, non-erythrocytic 1 OS=Homo sapiens GN=SPTBN1 PE=1 SV=2 - [SPTB2_HUMAN]	66.75	5.96	7.91	5.12	5.84	4.78	12.06	8.04	7.57	5.67	4.36	2.92	9.86	5.71	9.6	5.71	7.78	3.64	6.05	9.14	6.85
Q9NR31	GTP-binding protein SAR1a OS=Homo sapiens GN=SAR1A PE=1 SV=1 - [SAR1A_HUMAN]	66.67	5.56	11.11							5.56				17.17	11.62	11.62	27.27	27.27	15.66	11.62	11.11
O43324	Eukaryotic translation elongation factor 1 epsilon-1 OS=Homo sapiens GN=EEF1E1 PE=1 SV=1 - [MCA3_HUMAN]	66.67	10.34	6.32	13.22	18.39	8.62			8.62	22.99	5.75	11.49	4.6	12.07		10.34			12.07	6.32	6.32
Q15102	Platelet-activating factor acetylhydrolase IB subunit gamma OS=Homo sapiens GN=PAFAH1B3 PE=1 SV=1 - [PA1B3_HUMAN]	66.67	3.46				13.85	13.85	7.36		3.9	3.9		3.46		6.93	9.96		12.55		5.19
P16989-2	Isoform 2 of DNA-binding protein A OS=Homo sapiens GN=CSDA - [DBPA_HUMAN]	66.67	21.78	6.27	6.27			3.63	2.64	2.64		17.16		4.95	15.51	10.56	10.56	9.24	18.81	15.18	8.91	3.96
E5RI98	Nucleophosmin (Fragment) OS=Homo sapiens GN=NPM1 PE=2 SV=1 - [E5RI98_HUMAN]	66.67	6.31	25.23	53.15	12.61	12.61	34.23	40.54	40.54	59.46	12.61	34.23	6.31	53.15	6.31	12.61	59.46	18.92	25.23	19.82	38.74
J3QRG6	Cyclin-dependent kinase inhibitor 2A, isoforms 1/2/3 OS=Homo sapiens GN=CDKN2A PE=4 SV=1 - [J3QRG6_HUMAN]	66.67	15.94							29.71		8.7	8.7	15.94	8.7						12.32
P05386	60S acidic ribosomal protein P1 OS=Homo sapiens GN=RPLP1 PE=1 SV=1 - [RLA1_HUMAN]	66.67		14.91	14.91		14.91				14.04				14.91		37.72			14.04	14.04	14.91
Q4VC31	Coiled-coil domain-containing protein 58 OS=Homo sapiens GN=CCDC58 PE=1 SV=1 - [CCD58_HUMAN]	66.67			10.42		7.64		9.03		11.81	25.69	13.89		12.5						7.64	7.64
Q9NRR3	CDC42 small effector protein 2 OS=Homo sapiens GN=CDC42SE2 PE=1 SV=1 - [C42S2_HUMAN]	66.67														66.67	22.62
D6RHC4	Ankyrin repeat and KH domain-containing protein 1 (Fragment) OS=Homo sapiens GN=ANKHD1 PE=2 SV=1 - [D6RHC4_HUMAN]	66.58	23.1		2.72			1.9		5.98	11.41	3.8		5.16		10.6			4.08	4.08	4.08	4.62
P30084	Enoyl-CoA hydratase, mitochondrial OS=Homo sapiens GN=ECHS1 PE=1 SV=4 - [ECHM_HUMAN]	66.55	17.59	19.66	9.31		3.79	5.52	5.52	10	3.1	12.07	21.03	17.24	21.38	12.07	13.45	18.62	6.21	15.86	19.31	16.21
Q99598	Translin-associated protein X OS=Homo sapiens GN=TSNAX PE=1 SV=1 - [TSNAX_HUMAN]	66.55	11.03	6.55	6.55	22.76	3.45	3.45		7.59	7.59		3.45	7.59					11.72	5.86	5.86	16.9
D6RA82	Annexin OS=Homo sapiens GN=ANXA3 PE=2 SV=1 - [D6RA82_HUMAN]	66.55	10.92	19.72	13.73	9.15	9.15	5.99	4.58	7.39	2.82	11.97	5.63	9.86	8.8	5.63	4.58	9.86	5.63	19.72	15.49	12.68
Q13347	Eukaryotic translation initiation factor 3 subunit I OS=Homo sapiens GN=EIF3I PE=1 SV=1 - [EIF3I_HUMAN]	66.46	3.69		6.46	11.38	4.92	8	3.38	15.08	3.38	3.38	26.46	6.46	19.38	2.77	3.08	4	4	3.08	3.08
Q16718	NADH dehydrogenase [ubiquinone] 1 alpha subcomplex subunit 5 OS=Homo sapiens GN=NDUFA5 PE=1 SV=3 - [NDUA5_HUMAN]	66.38		13.79	13.79	13.79				12.93	12.93					21.55			31.03	17.24	17.24
P45880	Voltage-dependent anion-selective channel protein 2 OS=Homo sapiens GN=VDAC2 PE=1 SV=2 - [VDAC2_HUMAN]	66.33	14.63	7.14	14.63	19.05	21.09	14.29	18.37	21.43	25.17	23.13	11.22	17.35	18.71	13.95	3.74	3.74	2.72	7.48	16.67	10.2
Q9Y2Z0	Suppressor of G2 allele of SKP1 homolog OS=Homo sapiens GN=SUGT1 PE=1 SV=3 - [SUGT1_HUMAN]	66.3		3.01	3.01		4.11	15.62	13.97	3.29	3.84	12.88	9.59		2.74		7.95	6.03	7.4	8.49	6.03	2.74
O96000	NADH dehydrogenase [ubiquinone] 1 beta subcomplex subunit 10 OS=Homo sapiens GN=NDUFB10 PE=1 SV=3 - [NDUBA_HUMAN]	66.28	22.67						6.98	13.95	16.86	16.86	8.14	23.26	5.81	16.86		6.4
P04183	Thymidine kinase, cytosolic OS=Homo sapiens GN=TK1 PE=1 SV=2 - [KITH_HUMAN]	66.24	4.27				10.68	5.98	5.13	5.13	7.69	17.52	21.37	10.68		4.27	13.25
P62244	40S ribosomal protein S15a OS=Homo sapiens GN=RPS15A PE=1 SV=2 - [RS15A_HUMAN]	66.15		6.92	6.92	6.92	6.92	12.31	13.08		6.92		29.23	6.15	15.38	10.77	16.92	23.85	23.85	26.15	15.38
P02794	Ferritin heavy chain OS=Homo sapiens GN=FTH1 PE=1 SV=2 - [FRIH_HUMAN]	66.12		5.46						12.02	22.4	15.85			21.31	6.01	11.48		7.1		4.92
B7Z1R5	V-type proton ATPase catalytic subunit A OS=Homo sapiens GN=ATP6V1A PE=2 SV=1 - [B7Z1R5_HUMAN]	66.1	6.16			2.57	11.13	7.19	11.3	13.36	17.64	11.13	8.9	13.53	8.9	6.51	2.91		1.37	2.57	5.48
J3KNC0	Transcription initiation factor IIA beta chain OS=Homo sapiens GN=GTF2A1 PE=4 SV=1 - [J3KNC0_HUMAN]	66.1		66.1	18.64																	28.81
Q14240	Eukaryotic initiation factor 4A-II OS=Homo sapiens GN=EIF4A2 PE=1 SV=2 - [IF4A2_HUMAN]	66.09	4.18	9.09	5.16	7.37	16.46	7.37	5.9	8.35	15.48	16.71	15.97	10.07	12.29	10.07	2.46	6.14	3.69	6.63	6.63	9.09
P53582	Methionine aminopeptidase 1 OS=Homo sapiens GN=METAP1 PE=1 SV=2 - [AMPM1_HUMAN]	66.06		2.85		2.07	16.84	4.4	10.1	7.51	10.88	5.44			3.37	5.44	5.18	5.18		6.99
Q96FQ6	Protein S100-A16 OS=Homo sapiens GN=S100A16 PE=1 SV=1 - [S10AG_HUMAN]	66.02	8.74			31.07	46.6	11.65								10.68	10.68	10.68	11.65	11.65
P12429	Annexin A3 OS=Homo sapiens GN=ANXA3 PE=1 SV=3 - [ANXA3_HUMAN]	65.94	14.55	17.34	12.07	8.05	8.05	5.26	4.02	6.5	4.95	10.53	4.95	13.62	12.69	4.95	4.02	6.19	4.95	17.34	13.62	11.15
Q15019	Septin-2 OS=Homo sapiens GN=SEPT2 PE=1 SV=1 - [SEPT2_HUMAN]	65.93	3.05	5.54	22.71	14.68		8.03	11.36	13.57	3.32	10.53	14.96	3.32	2.49	3.05	3.05	4.43	6.37	5.26	9.42	9.7
P63313	Thymosin beta-10 OS=Homo sapiens GN=TMSB10 PE=1 SV=2 - [TYB10_HUMAN]	65.91	31.82	31.82	31.82	31.82	29.55						31.82		63.64	31.82				34.09	31.82	31.82
C9J9K3	40S ribosomal protein SA (Fragment) OS=Homo sapiens GN=RPSA PE=2 SV=1 - [C9J9K3_HUMAN]	65.91		14.77	15.91	9.09	4.17	32.2	26.89	39.77	4.92	19.32	6.06		14.77	8.71	12.88	25	15.15	6.44	12.5	17.8
Q13838	Spliceosome RNA helicase DDX39B OS=Homo sapiens GN=DDX39B PE=1 SV=1 - [DX39B_HUMAN]	65.89	12.15	8.64	5.14	7.48	3.27	3.27	5.37	5.37	19.86	24.77	18.93	22.9	21.26	18.69	8.64	2.8	2.8	12.38	10.75	5.84
Q9Y230	RuvB-like 2 OS=Homo sapiens GN=RUVBL2 PE=1 SV=3 - [RUVB2_HUMAN]	65.87	12.31	7.99	6.26	10.58	5.83	6.05	8.64	5.18	12.1	9.5	7.13	17.49	13.82	22.25	17.28	23.76	9.5	2.38	7.34	6.26
Q9Y2T3	Guanine deaminase OS=Homo sapiens GN=GDA PE=1 SV=1 - [GUAD_HUMAN]	65.86				10.35	11.01	15.2	9.25	4.19		7.05	23.13		18.72	5.29	1.76	4.85	9.25	3.52	1.76
F8VQW0	Bax inhibitor 1 (Fragment) OS=Homo sapiens GN=TMBIM6 PE=2 SV=1 - [F8VQW0_HUMAN]	65.85		31.71										19.51					14.63
P36871	Phosphoglucomutase-1 OS=Homo sapiens GN=PGM1 PE=1 SV=3 - [PGM1_HUMAN]	65.84	5.87	17.44	16.19	12.63	9.79	6.94	5.87	10.85	7.83	5.52	4.09	8.54	4.8	7.83	13.17	1.78	7.47	10.14	3.74	3.74
O00148	ATP-dependent RNA helicase DDX39A OS=Homo sapiens GN=DDX39A PE=1 SV=2 - [DX39A_HUMAN]	65.81	4.45	5.85		13.35	5.39	6.09	3.28	6.32	17.1	17.1	6.09	7.03	7.96	5.62	5.62	2.81	15.22	7.03	3.98	5.85
P16083	Ribosyldihydronicotinamide dehydrogenase [quinone] OS=Homo sapiens GN=NQO2 PE=1 SV=5 - [NQO2_HUMAN]	65.8	7.79				3.9	3.9		6.06	19.05	20.35	11.69	7.79		19.91			8.23	13.42		9.52
Q9Y314	Nitric oxide synthase-interacting protein OS=Homo sapiens GN=NOSIP PE=1 SV=1 - [NOSIP_HUMAN]	65.78		3.65	4.32	4.32	3.65	3.65	12.62	9.97	9.97	9.97	2.33		4.98	10.96	10.96	5.98	3.65			8.64
P48047	ATP synthase subunit O, mitochondrial OS=Homo sapiens GN=ATP5O PE=1 SV=1 - [ATPO_HUMAN]	65.73	6.57	10.33			9.86	9.86	9.86	10.8	27.7	10.8	7.98	4.23	20.66			5.16	3.29		10.33	10.33
P19784	Casein kinase II subunit alpha' OS=Homo sapiens GN=CSNK2A2 PE=1 SV=1 - [CSK22_HUMAN]	65.71	8.57	9.43	8.29	4.29	9.43	3.43				18.29	6.86	2.29	16.57	2.29			4.29	8.86	8.86	5.71
P62829	60S ribosomal protein L23 OS=Homo sapiens GN=RPL23 PE=1 SV=1 - [RL23_HUMAN]	65.71			6.43	6.43	16.43			10.71	16.43	10.71	25	14.29	41.43	20	27.14	45.71	45.71	20	16.43	10.71
P52272-2	Isoform 2 of Heterogeneous nuclear ribonucleoprotein M OS=Homo sapiens GN=HNRNPM - [HNRPM_HUMAN]	65.7	10.56	18.52	7.09	1.01	10.42	13.02	10.56	15.34	13.17	5.79	4.34	9.7	13.89	8.54	15.92	20.12	16.06	18.67	13.75	19.39
Q13162	Peroxiredoxin-4 OS=Homo sapiens GN=PRDX4 PE=1 SV=1 - [PRDX4_HUMAN]	65.68	16.61	11.44	15.5	11.81	7.01	11.07	7.01	19.19	7.75	23.62	23.62	18.82	32.1	28.41	15.13	7.01	11.81	15.87	14.76	31.37
Q16576-2	Isoform 2 of Histone-binding protein RBBP7 OS=Homo sapiens GN=RBBP7 - [RBBP7_HUMAN]	65.67	3.41	10.02	10.02		6.61		11.51	8.1	13.43	16.84	14.93	1.49	7.25	1.92	5.76	14.93	2.56			10.02
P25325	3-mercaptopyruvate sulfurtransferase OS=Homo sapiens GN=MPST PE=1 SV=3 - [THTM_HUMAN]	65.66	2.36		11.11		9.09	15.82	13.13	3.03				5.05				11.11	16.5	7.74	5.39
P15374	Ubiquitin carboxyl-terminal hydrolase isozyme L3 OS=Homo sapiens GN=UCHL3 PE=1 SV=1 - [UCHL3_HUMAN]	65.65	6.96	21.74	14.78			10.87	9.13	4.78				6.09	13.04	19.57	12.61	26.96		6.96	8.7	10.43
Q01082-3	Isoform 2 of Spectrin beta chain, non-erythrocytic 1 OS=Homo sapiens GN=SPTBN1 - [SPTB2_HUMAN]	65.61	6.26	7.33	5.06	4.97	4.69	10.58	6.5	7.05	5.38	3.34	3.2	9.33	6.26	9.74	5.48	7.66	3.99	6.64	10.02	8.72
Q15907	Ras-related protein Rab-11B OS=Homo sapiens GN=RAB11B PE=1 SV=4 - [RB11B_HUMAN]	65.6	5.5	7.34	7.8	7.34	6.88	11.01	8.26	5.96		10.55	4.59		5.5	14.68	19.72	5.05	5.05	6.88	3.67	7.34
Q9Y3A5	Ribosome maturation protein SBDS OS=Homo sapiens GN=SBDS PE=1 SV=4 - [SBDS_HUMAN]	65.6	14.4	8	22.4	9.6	4	6.8			7.6	10.4	6.8	7.6	10.8	11.2	10.4	7.2			3.6	6.8
Q9H410-4	Isoform 4 of Kinetochore-associated protein DSN1 homolog OS=Homo sapiens GN=DSN1 - [DSN1_HUMAN]	65.59	4.71						11.76		7.65	5.29	4.12	3.24	2.94	10.29	4.41	5.29		2.65	4.12	4.41
Q9GZS3	WD repeat-containing protein 61 OS=Homo sapiens GN=WDR61 PE=1 SV=1 - [WDR61_HUMAN]	65.57	5.9		8.85	3.28		5.57	5.57	18.69	15.74	9.51	3.28	4.26	3.28	9.51	5.25	14.43	13.11	6.56	9.51
B4DN45	S-adenosylmethionine synthase OS=Homo sapiens GN=MAT2A PE=2 SV=1 - [B4DN45_HUMAN]	65.55	19.06	2.34	9.03		5.02	5.02	5.02	3.34	5.02	12.04	7.02	3.68	6.69	5.35		3.68	11.37	17.06		2.34
J3KPX7	Prohibitin-2 OS=Homo sapiens GN=PHB2 PE=4 SV=1 - [J3KPX7_HUMAN]	65.55	7.36	9.03	8.36	8.36	12.37	5.35	7.69	9.03	16.72	22.07	15.38	13.38	3.34	7.02	4.01	3.34	10.03	18.39	8.36
Q7L0Y3	Mitochondrial ribonuclease P protein 1 OS=Homo sapiens GN=TRMT10C PE=1 SV=2 - [MRRP1_HUMAN]	65.51	7.94		7.44	6.45	8.44	6.95	10.92	12.66	3.47	4.47	5.46	11.17	3.97	4.96	4.47	4.71	5.21		2.23
G3XA91	Methionine aminopeptidase OS=Homo sapiens GN=METAP2 PE=2 SV=1 - [G3XA91_HUMAN]	65.49	12.97	12.53	10.77		6.37	9.23							6.15	8.79	8.79	4.84	3.96	6.81	3.96	10.99
P18754-2	Isoform 2 of Regulator of chromosome condensation OS=Homo sapiens GN=RCC1 - [RCC1_HUMAN]	65.49		7.52		5.97	11.06	6.19	4.2	9.73	7.08	7.52	3.32		6.42	6.64	9.51	18.81	17.04	11.95		8.19
H9KV75	Alpha-actinin-1 OS=Homo sapiens GN=ACTN1 PE=2 SV=1 - [H9KV75_HUMAN]	65.45	6.93	8.52	8.03	10.1	12.53	13.5	13.99	5.47	10.46	13.14	8.39	5.96	7.91	10.83	8.39	17.52	10.1	9.73	10.46	4.87
Q8WVC2	40S ribosomal protein S21 OS=Homo sapiens GN=RPS21 PE=2 SV=1 - [Q8WVC2_HUMAN]	65.43			32.1	13.58	22.22		22.22	22.22	35.8	46.91	46.91		33.33			12.35	12.35	48.15	28.4	22.22
Q9Y2B0	Protein canopy homolog 2 OS=Homo sapiens GN=CNPY2 PE=1 SV=1 - [CNPY2_HUMAN]	65.38			21.43	17.03	13.74	20.88	8.79	7.69	7.69	15.93	8.24	8.79		5.49	6.59	6.59			5.49
P28838-2	Isoform 2 of Cytosol aminopeptidase OS=Homo sapiens GN=LAP3 - [AMPL_HUMAN]	65.37	9.02	3.89	11.07	5.94	4.51		10.45	1.84	4.51	5.53	3.28	7.17	1.84	5.94	5.53	5.94	3.07	7.58	5.94	5.53
P49321	Nuclear autoantigenic sperm protein OS=Homo sapiens GN=NASP PE=1 SV=2 - [NASP_HUMAN]	65.36	9.77	8.12	9.52	4.19	8.5	12.56	1.65	6.85	2.92	4.57	7.61	20.3	6.22	9.01	6.85	10.28	6.09	1.65	2.92	3.55
Q9Y265	RuvB-like 1 OS=Homo sapiens GN=RUVBL1 PE=1 SV=1 - [RUVB1_HUMAN]	65.35	14.04	19.08	11.62	2.63	6.8	14.04	11.84	5.48	5.92	4.82	7.02	19.74	16.01	13.16	11.4	15.57	14.91	10.09	8.77	16.45
Q9Y5K5	Ubiquitin carboxyl-terminal hydrolase isozyme L5 OS=Homo sapiens GN=UCHL5 PE=1 SV=3 - [UCHL5_HUMAN]	65.35		17.93	6.69	6.69		10.33		4.86	4.86	10.64	5.78			4.26	9.42	15.5	10.33	6.38	18.24	10.64
Q9Y333	U6 snRNA-associated Sm-like protein LSm2 OS=Homo sapiens GN=LSM2 PE=1 SV=1 - [LSM2_HUMAN]	65.26				20	25.26		20	31.58		20	20		20
Q96EK6	Glucosamine 6-phosphate N-acetyltransferase OS=Homo sapiens GN=GNPNAT1 PE=1 SV=1 - [GNA1_HUMAN]	65.22	5.98		7.07						5.98	19.57	9.78		7.61			8.15	8.15	7.07
Q8TDN6	Ribosome biogenesis protein BRX1 homolog OS=Homo sapiens GN=BRIX1 PE=1 SV=2 - [BRX1_HUMAN]	65.16	8.22	13.88	1.98	5.1	5.1	7.37	4.82	4.82	1.98			10.2	5.67	16.15	19.55	10.76	9.35	7.08	3.68
P25205	DNA replication licensing factor MCM3 OS=Homo sapiens GN=MCM3 PE=1 SV=3 - [MCM3_HUMAN]	65.1	3.71	8.29	5.57	3.22	4.58	2.6	7.8	7.8	8.29	6.93	6.06	4.58	6.06	6.44	5.82	10.27	8.17	4.83	11.76	9.53
Q9Y315	Putative deoxyribose-phosphate aldolase OS=Homo sapiens GN=DERA PE=1 SV=2 - [DEOC_HUMAN]	65.09	11.01		3.46		9.75	11.64	5.03	2.83	5.03	5.03		6.92	14.47		7.55		3.14	4.72	5.03
C9JSZ1	Far upstream element-binding protein 1 (Fragment) OS=Homo sapiens GN=FUBP1 PE=2 SV=1 - [C9JSZ1_HUMAN]	65.09		17.24		11.21	11.21						18.97	8.62	12.5	12.07	13.79	5.17	20.26	15.52	15.52	5.6
F5H425	Eukaryotic translation initiation factor 3 subunit J OS=Homo sapiens GN=EIF3J PE=2 SV=1 - [F5H425_HUMAN]	65.07	26.32		5.26	5.26	10.53	11.96	5.74	11				11.96	11.96	12.44	17.7		9.57	15.31	9.57
Q9Y2Q3	Glutathione S-transferase kappa 1 OS=Homo sapiens GN=GSTK1 PE=1 SV=3 - [GSTK1_HUMAN]	65.04		6.64	3.98	3.98	3.98	4.42	5.31	11.5	5.31	7.08	7.08		6.64		4.87	4.87	26.11		6.19	12.83
Q96I24	Far upstream element-binding protein 3 OS=Homo sapiens GN=FUBP3 PE=1 SV=2 - [FUBP3_HUMAN]	65.03	4.9	2.97		1.57	6.29	3.15	2.62	14.86	13.29	7.17	1.4	1.4	1.75	6.99	6.99	13.46	8.22	9.27	12.59	2.1
P25786	Proteasome subunit alpha type-1 OS=Homo sapiens GN=PSMA1 PE=1 SV=1 - [PSA1_HUMAN]	65.02	4.18		4.18	4.18			11.79	12.93	3.42		2.66	4.56	6.08	4.56	4.56	7.6	27	26.24	12.93
O60220	Mitochondrial import inner membrane translocase subunit Tim8 A OS=Homo sapiens GN=TIMM8A PE=1 SV=1 - [TIM8A_HUMAN]	64.95			8.25							11.34	11.34	45.36		15.46
O00161	Synaptosomal-associated protein 23 OS=Homo sapiens GN=SNAP23 PE=1 SV=1 - [SNP23_HUMAN]	64.93			8.53	4.74	5.69	13.27				5.21		8.06	4.27			9	3.32	6.16		11.85
E5RI99	60S ribosomal protein L30 (Fragment) OS=Homo sapiens GN=RPL30 PE=2 SV=1 - [E5RI99_HUMAN]	64.91	24.56	37.72	32.46	32.46	16.67	21.93	26.32	51.75	27.19	48.25	34.21	14.04	44.74	14.04	14.04	14.04	18.42		10.53	10.53
Q06210-2	Isoform 2 of Glutamine--fructose-6-phosphate aminotransferase [isomerizing] 1 OS=Homo sapiens GN=GFPT1 - [GFPT1_HUMAN]	64.9	11.16	9.54	7.34	4.11	9.25	9.84	10.57	12.04	6.31	3.67	5.87	5.87	7.2	8.22	8.37	11.16	4.11	5.73	2.94	6.9
P20042	Eukaryotic translation initiation factor 2 subunit 2 OS=Homo sapiens GN=EIF2S2 PE=1 SV=2 - [IF2B_HUMAN]	64.86	5.41	17.42	11.41		5.11	20.12	9.91	7.51	2.7	3.6	3.6	9.31		8.41	9.01		4.8	3	13.21	14.41
E5RI56	S-phase kinase-associated protein 1 (Fragment) OS=Homo sapiens GN=SKP1 PE=2 SV=1 - [E5RI56_HUMAN]	64.84								14.29	14.29	14.29				30.77	18.68		31.87
P62745	Rho-related GTP-binding protein RhoB OS=Homo sapiens GN=RHOB PE=1 SV=1 - [RHOB_HUMAN]	64.8		4.08	8.67	12.24		21.43	6.12				12.24		12.24			8.67	8.67		15.82	14.8
P60842	Eukaryotic initiation factor 4A-I OS=Homo sapiens GN=EIF4A1 PE=1 SV=1 - [IF4A1_HUMAN]	64.78	11.08	12.56	7.88	10.1	17	17.24	13.79	35.47	25.12	22.66	27.34	11.82	26.85	26.11	20.94	23.15	11.82	21.67	6.65	14.78
Q9HC38-2	Isoform 2 of Glyoxalase domain-containing protein 4 OS=Homo sapiens GN=GLOD4 - [GLOD4_HUMAN]	64.77	7.72	11.41	3.69	3.69		4.03		3.36	13.09	9.06	6.71	3.36	3.36		11.41	26.17	20.13	11.07	3.69
E5RJA0	Acyl-protein thioesterase 1 OS=Homo sapiens GN=LYPLA1 PE=2 SV=1 - [E5RJA0_HUMAN]	64.75		5.76	5.76					7.91	17.99	28.78				12.95	12.95			9.35	9.35
Q9BSD7	Cancer-related nucleoside-triphosphatase OS=Homo sapiens GN=NTPCR PE=1 SV=1 - [NTPCR_HUMAN]	64.74	24.74	16.32	5.26	9.47	9.47							11.05	20				6.84	4.74	4.74	15.79
Q9Y697-2	Isoform Cytoplasmic of Cysteine desulfurase, mitochondrial OS=Homo sapiens GN=NFS1 - [NFS1_HUMAN]	64.74	3.53		3.53	7.56	6.3	3.53		6.05	1.76		12.85	3.53	7.05		3.27	11.08		6.3		13.35
P78417	Glutathione S-transferase omega-1 OS=Homo sapiens GN=GSTO1 PE=1 SV=2 - [GSTO1_HUMAN]	64.73	18.26	15.77	13.28	8.71	4.15	7.88	20.33	29.05	14.52	19.92	25.73	14.94	12.86	8.71				4.15	7.88	12.45
Q6I9Y2	THO complex subunit 7 homolog OS=Homo sapiens GN=THOC7 PE=1 SV=3 - [THOC7_HUMAN]	64.71	12.25	4.9	4.9			7.84	6.37	4.9				7.35		12.75			14.71		10.78
P62633-2	Isoform 2 of Cellular nucleic acid-binding protein OS=Homo sapiens GN=CNBP - [CNBP_HUMAN]	64.71	12.35					7.65	7.65	7.65	7.65	10	12.35	12.94	17.65	10		20		13.53
Q8N4H5	Mitochondrial import receptor subunit TOM5 homolog OS=Homo sapiens GN=TOMM5 PE=1 SV=1 - [TOM5_HUMAN]	64.71		15.69						19.61	19.61	15.69	21.57				13.73				13.73	15.69
O94826	Mitochondrial import receptor subunit TOM70 OS=Homo sapiens GN=TOMM70A PE=1 SV=1 - [TOM70_HUMAN]	64.64	1.97	4.61	3.78			7.24	13.32	1.48	4.28	6.58	4.77	7.07	7.57	6.58	2.96	15.63	18.59	9.7	9.54	7.57
P07814	Bifunctional glutamate/proline--tRNA ligase OS=Homo sapiens GN=EPRS PE=1 SV=5 - [SYEP_HUMAN]	64.55	7.28	3.77	4.89	5.16	2.78	6.88	9.99	13.36	14.75	11.71	5.22	12.7	9.33	15.61	11.9	14.95	11.31	9.72	7.61	8.07
P18206-2	Isoform 1 of Vinculin OS=Homo sapiens GN=VCL - [VINC_HUMAN]	64.54	6.85	10.51	8.91	9.19	12.1	9.94	7.32	6.66	8.07	7.41	1.78	10.88	5.16	12.66	7.41	5.07	4.41	3.1	4.78	6.47
I3L1P8	Mitochondrial 2-oxoglutarate/malate carrier protein (Fragment) OS=Homo sapiens GN=SLC25A11 PE=2 SV=1 - [I3L1P8_HUMAN]	64.53	5.41	18.24	3.72	7.09		11.15	7.43	12.84	14.86	8.11	5.41	9.46	15.2	8.11	4.05	12.16	12.16	12.5	11.49	14.53
Q9Y3D8	Adenylate kinase isoenzyme 6 OS=Homo sapiens GN=TAF9 PE=1 SV=1 - [KAD6_HUMAN]	64.53		15.12	9.88						22.09	5.81			18.02			4.07	4.07		5.23
D6RAN8	39S ribosomal protein L27, mitochondrial OS=Homo sapiens GN=MRPL27 PE=2 SV=1 - [D6RAN8_HUMAN]	64.52			11.83	11.83		16.13	16.13			16.13		8.6			27.96	17.2
Q16658	Fascin OS=Homo sapiens GN=FSCN1 PE=1 SV=3 - [FSCN1_HUMAN]	64.5	21.7	8.52	10.95	4.87	9.13	11.56	10.34	12.98	10.55	11.56	8.11	12.37	14.6	10.75	18.26	18.46	10.75	8.32	8.72	8.32
Q96C01	Protein FAM136A OS=Homo sapiens GN=FAM136A PE=1 SV=1 - [F136A_HUMAN]	64.49	10.14	6.52	13.04						5.8	7.25		10.14	7.25	10.14	5.07		10.14			7.25
Q9UMS4	Pre-mRNA-processing factor 19 OS=Homo sapiens GN=PRPF19 PE=1 SV=1 - [PRP19_HUMAN]	64.48	1.98	9.13	9.33	2.98	3.97	6.15	6.94			9.72	4.76	2.78	18.85	8.33		6.94	6.35	2.98	4.37	2.78
F8VYE8	Serine/threonine-protein phosphatase OS=Homo sapiens GN=PPP1CC PE=2 SV=1 - [F8VYE8_HUMAN]	64.47	15.79	9.87	6.58	2.96	4.61	9.21	10.53	27.63	17.76	8.88	5.59	9.54	6.25			10.2	10.2	16.45	8.22	11.18
E9PN17	ATP synthase subunit g, mitochondrial OS=Homo sapiens GN=ATP5L PE=2 SV=1 - [E9PN17_HUMAN]	64.47		11.84								32.89	32.89		32.89	19.74	14.47	14.47	14.47
E5RHP5	DNA replication licensing factor MCM4 (Fragment) OS=Homo sapiens GN=MCM4 PE=2 SV=1 - [E5RHP5_HUMAN]	64.42	24.04	17.31		8.65	8.65	13.46			8.65			30.77		6.73	7.69		10.58		24.04	17.31
P40227	T-complex protein 1 subunit zeta OS=Homo sapiens GN=CCT6A PE=1 SV=3 - [TCPZ_HUMAN]	64.41		8.66	17.89	19.77	6.78	15.07	22.6	20.53	6.21	13.75	6.59	1.69	1.32		1.69	8.29	8.66		3.01	3.77
O43752	Syntaxin-6 OS=Homo sapiens GN=STX6 PE=1 SV=1 - [STX6_HUMAN]	64.31		16.47	31.37					4.31				8.24		13.73	5.49				4.31	9.8
H0YEQ8	Polyadenylate-binding protein 4 (Fragment) OS=Homo sapiens GN=PABPC4 PE=4 SV=1 - [H0YEQ8_HUMAN]	64.29	8.04	13.39	13.39	8.93	23.21				9.82				8.04					17.86	17.86	21.43
D6RF44	Heterogeneous nuclear ribonucleoprotein D0 (Fragment) OS=Homo sapiens GN=HNRNPD PE=2 SV=1 - [D6RF44_HUMAN]	64.29		8.93	20.54	20.54	7.14	22.32		7.14	26.79	19.64	12.5	22.32	8.93	10.71		6.25	16.96	17.86	19.64	8.93
P35080	Profilin-2 OS=Homo sapiens GN=PFN2 PE=1 SV=3 - [PROF2_HUMAN]	64.29				7.86	10	10	10.71		5.71	19.29	19.29							20	20
P08195-2	Isoform 2 of 4F2 cell-surface antigen heavy chain OS=Homo sapiens GN=SLC3A2 - [4F2_HUMAN]	64.27	13.04	10.59	19.28	18.53	12.48	16.64	15.5	11.72	22.5	21.17	12.67	12.67	21.17	3.4		9.64	16.45	16.07	14.56	10.96
O94760	N(G),N(G)-dimethylarginine dimethylaminohydrolase 1 OS=Homo sapiens GN=DDAH1 PE=1 SV=3 - [DDAH1_HUMAN]	64.21		11.58	6.67		9.82	8.42	6.67	6.67	7.37	22.11	16.49							4.21
O60664-3	Isoform 3 of Perilipin-3 OS=Homo sapiens GN=PLIN3 - [PLIN3_HUMAN]	64.2	4.16	7.62			3.93	6.93	6.93	3.23	3.46		3.7	5.77	6.47	1.39	14.78	16.86	31.41	32.56	7.39	3.93
Q9UK22	F-box only protein 2 OS=Homo sapiens GN=FBXO2 PE=1 SV=2 - [FBX2_HUMAN]	64.19	5.41		12.16	7.43		23.65			4.05		3.38				5.07	5.07	4.05	4.05		10.47
P20339	Ras-related protein Rab-5A OS=Homo sapiens GN=RAB5A PE=1 SV=2 - [RAB5A_HUMAN]	64.19			5.12			13.02	5.12	13.95	25.12		6.51						6.51		4.65	3.26
Q15691	Microtubule-associated protein RP/EB family member 1 OS=Homo sapiens GN=MAPRE1 PE=1 SV=3 - [MARE1_HUMAN]	64.18		14.18	6.72	10.45	23.51	26.87	20.52	20.15		2.61	11.19		6.72		4.48	5.22			6.72	14.18
H3BPD9	Nucleoside diphosphate kinase 3 (Fragment) OS=Homo sapiens GN=NME3 PE=2 SV=2 - [H3BPD9_HUMAN]	64.15				22.64												13.21	41.51
Q9NTK5	Obg-like ATPase 1 OS=Homo sapiens GN=OLA1 PE=1 SV=2 - [OLA1_HUMAN]	64.14	10.61	7.32	1.77		4.55	4.8	5.05	2.53	3.79		9.34	19.95	10.86	17.93	13.64	12.12	9.09	13.64	9.6	3.54
P10696	Alkaline phosphatase, placental-like OS=Homo sapiens GN=ALPPL2 PE=1 SV=4 - [PPBN_HUMAN]	64.1	22.93	6.2	12.78	9.21	9.21	5.45	13.53	17.29	7.89	7.71	12.03	19.92	11.84	19.74	15.98	13.16	8.08	11.47	7.71	11.47
P35237	Serpin B6 OS=Homo sapiens GN=SERPINB6 PE=1 SV=3 - [SPB6_HUMAN]	64.1	10.37	4.52				9.31	7.71	8.78	2.13	3.99	7.98	18.88	8.51	7.98		4.26	3.99	10.9		6.12
P62987	Ubiquitin-60S ribosomal protein L40 OS=Homo sapiens GN=UBA52 PE=1 SV=2 - [RL40_HUMAN]	64.06	29.69	31.25	31.25	35.16	27.34	11.72	31.25	28.13	15.63			24.22		26.56	34.38	22.66	29.69	17.19	17.19	18.75
Q96FJ2	Dynein light chain 2, cytoplasmic OS=Homo sapiens GN=DYNLL2 PE=1 SV=1 - [DYL2_HUMAN]	64.04	13.48				7.87	32.58	24.72			12.36	12.36		13.48				12.36	24.72	13.48	12.36
O14818-2	Isoform 2 of Proteasome subunit alpha type-7 OS=Homo sapiens GN=PSMA7 - [PSA7_HUMAN]	64.04	21.35	8.43		7.87	7.87	7.87	18.54		5.06	5.06		15.73	14.61	12.36				11.24	14.61	14.61
O75083	WD repeat-containing protein 1 OS=Homo sapiens GN=WDR1 PE=1 SV=4 - [WDR1_HUMAN]	64.03	6.27	1.65	8.58	9.9	3.14	2.97	6.11	11.39	16.67	9.24	5.94	9.57	4.95	12.21	10.56	7.76	7.76	9.08	9.57
P78330	Phosphoserine phosphatase OS=Homo sapiens GN=PSPH PE=1 SV=2 - [SERB_HUMAN]	64	3.56			9.78	19.11	17.33	11.11	5.78	13.33	12.89		7.11		16	15.56	4	4	4
G3V2H0	ERO1-like protein alpha (Fragment) OS=Homo sapiens GN=ERO1L PE=2 SV=1 - [G3V2H0_HUMAN]	64	14.67	14.67	26.67	26.67		21.33			22.67	22.67			14.67				28	14.67		14.67
Q9UL25	Ras-related protein Rab-21 OS=Homo sapiens GN=RAB21 PE=1 SV=3 - [RAB21_HUMAN]	64		12	4.89	10.67	4.89	11.56	11.56	11.11	6.67	6.67	21.33	8.44	25.33	4.89	5.33	4.44	11.56			18.67
P36954	DNA-directed RNA polymerase II subunit RPB9 OS=Homo sapiens GN=POLR2I PE=1 SV=1 - [RPB9_HUMAN]	64				18.4						9.6									13.6	22.4
O00231	26S proteasome non-ATPase regulatory subunit 11 OS=Homo sapiens GN=PSMD11 PE=1 SV=3 - [PSD11_HUMAN]	63.98	5.92	5.21	2.84	11.37	8.53	2.84	9.48	6.64	3.08	3.79	3.79	15.17	6.87	5.21	6.87	7.58	4.98	16.35	8.53	2.61
Q8WXX5	DnaJ homolog subfamily C member 9 OS=Homo sapiens GN=DNAJC9 PE=1 SV=1 - [DNJC9_HUMAN]	63.85	12.31	2.69		8.08	19.23	11.15		22.31	5	7.69	9.62	12.31	4.23		12.69				10.38	10.38
P09104	Gamma-enolase OS=Homo sapiens GN=ENO2 PE=1 SV=3 - [ENOG_HUMAN]	63.82	4.15	5.07	3.46	5.07	14.29	13.13	17.97	19.12	12.67	20.51	11.52		11.06	8.99	8.99	11.06	19.59	12.21	7.37	7.37
P11172	Uridine 5'-monophosphate synthase OS=Homo sapiens GN=UMPS PE=1 SV=1 - [UMPS_HUMAN]	63.75	1.88	4.17	2.29	7.92	5.63	4.58	15	3.13		3.33	3.33		7.92	4.17	13.75	14.37	3.54		1.88	5.63
P46108-2	Isoform Crk-I of Adapter molecule crk OS=Homo sapiens GN=CRK - [CRK_HUMAN]	63.73	9.31	3.92		7.35	7.35	8.33	8.33		14.22				7.84	16.18	16.67	13.73	7.35	15.69	8.33
J3KPV7	Sulfurtransferase OS=Homo sapiens GN=MPST PE=4 SV=1 - [J3KPV7_HUMAN]	63.72		4.42	14.83		8.52	14.83	12.3	2.84				4.73				10.41	15.46	7.26	5.05
P14868	Aspartate--tRNA ligase, cytoplasmic OS=Homo sapiens GN=DARS PE=1 SV=2 - [SYDC_HUMAN]	63.67	5.99	9.98		2.2	4.19	2	5.19	5.59	10.38	10.58	1.4	1.4	7.19	10.18	5.39	8.78	8.98	13.97	9.78	5.79
P47755	F-actin-capping protein subunit alpha-2 OS=Homo sapiens GN=CAPZA2 PE=1 SV=3 - [CAZA2_HUMAN]	63.64	8.39	10.14	6.64	6.99	13.64	6.64	6.29	6.29	9.09	9.09	17.83	11.54	18.53					14.69	11.19	3.5
O00165-5	Isoform 5 of HCLS1-associated protein X-1 OS=Homo sapiens GN=HAX1 - [HAX1_HUMAN]	63.64		4.76			3.9		3.9	27.71	4.76				7.79	14.29						5.19
O43660	Pleiotropic regulator 1 OS=Homo sapiens GN=PLRG1 PE=1 SV=1 - [PLRG1_HUMAN]	63.62	3.89	11.48	2.33	4.47	7.39	2.92		1.56		10.89	10.89	7.39	4.09	13.04	13.23	5.06	3.89	5.25	4.67	6.03
P26639	Threonine--tRNA ligase, cytoplasmic OS=Homo sapiens GN=TARS PE=1 SV=3 - [SYTC_HUMAN]	63.62	4.98	9.13	9.54	3.87	5.67	7.05	9.27	10.24	4.15	6.09	8.99	6.22	13.42	7.88	6.92	7.75	10.37	1.8	6.5	6.64
P06748	Nucleophosmin OS=Homo sapiens GN=NPM1 PE=1 SV=2 - [NPM_HUMAN]	63.61	14.97	26.19	33.67	15.99	22.45	35.71	37.07	29.25	44.22	18.71	27.21	19.05	36.73	20.75	26.53	42.18	21.09	31.29	16.67	23.81
Q9NWU2	Glucose-induced degradation protein 8 homolog OS=Homo sapiens GN=GID8 PE=1 SV=1 - [GID8_HUMAN]	63.6	6.58	5.26		7.46		7.46	7.46		7.46		14.47		9.21		10.53	20.18	4.82		10.09
H3BNN8	COX assembly mitochondrial protein 2 homolog OS=Homo sapiens GN=CMC2 PE=2 SV=1 - [H3BNN8_HUMAN]	63.51		13.51			16.22					29.73	29.73		13.51		17.57			13.51
Q14061	Cytochrome c oxidase copper chaperone OS=Homo sapiens GN=COX17 PE=1 SV=2 - [COX17_HUMAN]	63.49	31.75	25.4	25.4	25.4	25.4						26.98	31.75	26.98						20.63	38.1
Q9UKS6	Protein kinase C and casein kinase substrate in neurons protein 3 OS=Homo sapiens GN=PACSIN3 PE=1 SV=2 - [PACN3_HUMAN]	63.44	13.68	4.25	4.25	2.12	2.83		4.01	9.43	5.42		4.01	7.08	4.01		5.19	12.26	2.83		9.91	6.37
D6RCR4	Drebrin (Fragment) OS=Homo sapiens GN=DBN1 PE=2 SV=1 - [D6RCR4_HUMAN]	63.44							30.11										8.6	8.6	16.13	16.13
P12236	ADP/ATP translocase 3 OS=Homo sapiens GN=SLC25A6 PE=1 SV=4 - [ADT3_HUMAN]	63.42	14.77	19.13	20.13	19.8	14.43	17.45	6.04	11.74	5.37	7.72	21.48	8.39	26.17	14.09	14.09	17.11	11.41	19.8	23.15	19.13
O95757	Heat shock 70 kDa protein 4L OS=Homo sapiens GN=HSPA4L PE=1 SV=3 - [HS74L_HUMAN]	63.41	3.69	7.39	4.17	3.1	3.58	3.46	1.19	3.46	5.72	4.89	11.08	1.67	13.83	4.65	6.44	11.32	9.06	6.67	8.82	4.65
Q13561	Dynactin subunit 2 OS=Homo sapiens GN=DCTN2 PE=1 SV=4 - [DCTN2_HUMAN]	63.34	2.49			6.98	5.99	6.98	13.97	6.98		6.23	8.48		2.24	5.74	14.21	13.97	7.48	1.75	6.48	9.48
P82979	SAP domain-containing ribonucleoprotein OS=Homo sapiens GN=SARNP PE=1 SV=3 - [SARNP_HUMAN]	63.33		36.19	10.95	10.95					4.29	4.76	4.76		9.05	4.76			9.05	9.05	29.52	29.52
Q15029	116 kDa U5 small nuclear ribonucleoprotein component OS=Homo sapiens GN=EFTUD2 PE=1 SV=1 - [U5S1_HUMAN]	63.27	3.81	4.73	4.63	7	8.85	3.91	5.66	6.89	3.4	5.25	10.7	5.45	10.49	6.58	7.61	15.23	9.05	8.95	2.67	4.12
P12081	Histidine--tRNA ligase, cytoplasmic OS=Homo sapiens GN=HARS PE=1 SV=2 - [SYHC_HUMAN]	63.26	10.41				6.09	5.11	2.16	4.72	7.66	11.98	10.61	6.09	3.73	7.07	1.77	4.32	7.86	7.47	7.27	1.77
F5H3J2	Nuclear autoantigenic sperm protein OS=Homo sapiens GN=NASP PE=2 SV=1 - [F5H3J2_HUMAN]	63.26	10.64	2.9	7.04	1.38	5.94	4.7	1.8	1.8		3.87	7.18	22.1	6.77	9.81	7.46	11.19	6.63	1.8		3.87
Q9BY44	Eukaryotic translation initiation factor 2A OS=Homo sapiens GN=EIF2A PE=1 SV=3 - [EIF2A_HUMAN]	63.25	4.27	3.08	5.13	4.27	9.06	12.65	5.47	8.72	11.11	5.98	5.98	2.56	15.9		5.64	5.13	5.13	2.56	2.56	1.88
Q92499	ATP-dependent RNA helicase DDX1 OS=Homo sapiens GN=DDX1 PE=1 SV=2 - [DDX1_HUMAN]	63.24	5.81	6.76	7.43	3.51	9.32	11.89	6.76	8.11	7.84	7.43	7.7	10.27	14.19	7.43	2.16	3.92	7.7	10.14	8.65	13.38
O75663	TIP41-like protein OS=Homo sapiens GN=TIPRL PE=1 SV=2 - [TIPRL_HUMAN]	63.24		9.19	9.19		8.46	14.71	11.4	7.72	5.51	7.72	7.72		7.72	7.72	10.29	3.68		4.04	4.04	9.19
F8VQE1	LIM domain and actin-binding protein 1 OS=Homo sapiens GN=LIMA1 PE=2 SV=1 - [F8VQE1_HUMAN]	63.21	2.84	2.68	3.01	3.01	5.52	2.34	3.68	5.02	14.05	9.03		1.84	2.51	1.84	5.69	5.52	7.19	14.38	6.69	10.7
Q9UQ80	Proliferation-associated protein 2G4 OS=Homo sapiens GN=PA2G4 PE=1 SV=3 - [PA2G4_HUMAN]	63.2	7.61	19.04	12.94	8.38	11.93	5.33	11.93	4.82	8.63	8.63	8.63	11.93	17.77	19.8	14.21	14.21	4.31	13.45	11.42	17.77
Q9NRX4	14 kDa phosphohistidine phosphatase OS=Homo sapiens GN=PHPT1 PE=1 SV=1 - [PHP14_HUMAN]	63.2	9.6				16.8	16.8						18.4		21.6				16	16
P08107	Heat shock 70 kDa protein 1A/1B OS=Homo sapiens GN=HSPA1A PE=1 SV=5 - [HSP71_HUMAN]	63.18	18.56	8.27	9.36	4.52	3.12	3.74	14.2	14.35	24.8	28.86	22.62	9.52	19.34	13.88	9.67	11.86	24.02	20.59	15.91	10.76
P43487	Ran-specific GTPase-activating protein OS=Homo sapiens GN=RANBP1 PE=1 SV=1 - [RANG_HUMAN]	63.18		15.92	19.4	20.4	24.88	11.94		11.44	10.45		5.47		5.47		3.48	13.93	5.47	10.95	5.47	9.45
P19105	Myosin regulatory light chain 12A OS=Homo sapiens GN=MYL12A PE=1 SV=2 - [ML12A_HUMAN]	63.16			6.43		6.43		10.53	10.53	10.53	21.05	10.53		10.53	5.26	5.26	22.22	12.87	17.54	23.98	6.43
P26196	Probable ATP-dependent RNA helicase DDX6 OS=Homo sapiens GN=DDX6 PE=1 SV=2 - [DDX6_HUMAN]	63.15	8.7	2.48		2.07	14.7	10.56	1.66	2.07	3.11	4.76	4.55	10.14	5.8	7.45	4.14		4.76	3.52	9.94	3.73
O00764	Pyridoxal kinase OS=Homo sapiens GN=PDXK PE=1 SV=1 - [PDXK_HUMAN]	63.14	12.18	6.73		3.21		15.38	9.62		6.73		12.82	10.26	23.4	10.26	8.97	14.74	6.73	15.71	9.62	12.18
Q9HAV7	GrpE protein homolog 1, mitochondrial OS=Homo sapiens GN=GRPEL1 PE=1 SV=2 - [GRPE1_HUMAN]	63.13	15.21			20.28	12.9									9.68	5.07	16.13	11.06	6.91	6.91
H7C4H2	Signal recognition particle receptor subunit beta (Fragment) OS=Homo sapiens GN=SRPRB PE=4 SV=1 - [H7C4H2_HUMAN]	63.13		7.5				8.75	6.88	11.25		23.75	13.13				16.25	13.75	21.88	11.88	19.38	7.5
P31946-2	Isoform Short of 14-3-3 protein beta/alpha OS=Homo sapiens GN=YWHAB - [1433B_HUMAN]	63.11	24.18	15.16	16.39	23.36	11.48	11.48	7.79	7.38	9.02	8.2	7.38	12.7	6.97	13.93	10.66	16.39	11.89	19.67	11.89
Q14192	Four and a half LIM domains protein 2 OS=Homo sapiens GN=FHL2 PE=1 SV=3 - [FHL2_HUMAN]	63.08	3.94	5.73	3.23	9.32	8.6	3.94	3.94				5.02	4.3	12.19	8.96			2.51		7.53	15.77
P61224	Ras-related protein Rap-1b OS=Homo sapiens GN=RAP1B PE=1 SV=1 - [RAP1B_HUMAN]	63.04	5.98	20.11	14.13	14.67					14.13	8.15	8.15	19.57		20.65	6.52	11.96	12.5	15.22	8.15	5.98
P62834	Ras-related protein Rap-1A OS=Homo sapiens GN=RAP1A PE=1 SV=1 - [RAP1A_HUMAN]	63.04	5.98	5.98							14.13			19.57		13.59	6.52	19.02	5.43	22.83	8.15	5.98
P31946	14-3-3 protein beta/alpha OS=Homo sapiens GN=YWHAB PE=1 SV=3 - [1433B_HUMAN]	63.01	23.98	15.04	16.26	23.17	11.38	11.38	7.72	7.32	13.01	8.13	7.72	12.6	6.91	13.82	10.57	16.26	11.79	19.51	11.79
Q9UIJ7	GTP:AMP phosphotransferase AK3, mitochondrial OS=Homo sapiens GN=AK3 PE=1 SV=4 - [KAD3_HUMAN]	63	6.17				5.73	5.73	6.61	6.61	15.86	4.41	8.81	11.01	6.17	7.93	7.93	6.61	14.98	4.41		6.17
Q9H0P0-1	Isoform 1 of Cytosolic 5'-nucleotidase 3 OS=Homo sapiens GN=NT5C3 - [5NT3_HUMAN]	62.96	4.38	13.13	8.42				7.74	11.11		3.03	4.38	8.42					4.71	8.75	10.44	9.43
Q9UHD1	Cysteine and histidine-rich domain-containing protein 1 OS=Homo sapiens GN=CHORDC1 PE=1 SV=2 - [CHRD1_HUMAN]	62.95	2.41	18.07	9.34	9.04		9.94	17.47	15.06	4.52	4.52		4.52	2.41	6.93	9.64	4.22	13.86	2.41	2.41	7.83
Q92597	Protein NDRG1 OS=Homo sapiens GN=NDRG1 PE=1 SV=1 - [NDRG1_HUMAN]	62.94	10.41	13.96	3.55		4.31	7.11	12.18	11.93	16.75	20.56	3.81	6.35	11.17	13.96	14.47	13.71	9.9	8.88	8.38	10.15
Q5EBL8	PDZ domain-containing protein 11 OS=Homo sapiens GN=PDZD11 PE=1 SV=2 - [PDZ11_HUMAN]	62.86	15.71				11.43		18.57					25.71		17.14
P35080-2	Isoform IIb of Profilin-2 OS=Homo sapiens GN=PFN2 - [PROF2_HUMAN]	62.86					10	16.43	10.71			19.29	19.29	5.71		5.71	5.71			20	20
O00273	DNA fragmentation factor subunit alpha OS=Homo sapiens GN=DFFA PE=1 SV=1 - [DFFA_HUMAN]	62.84	3.32	6.34	4.83		12.39	3.32	4.83	4.83	12.99	12.99	12.99		5.14		3.32	8.46	6.04	5.14	3.63
O75340	Programmed cell death protein 6 OS=Homo sapiens GN=PDCD6 PE=1 SV=1 - [PDCD6_HUMAN]	62.83	15.71	6.28			14.14	5.76		8.9	3.14	7.33	4.19	6.81		20.94	13.09	5.24			6.28	6.28
B4DZI8	Coatomer protein complex, subunit beta 2 (Beta prime), isoform CRA_b OS=Homo sapiens GN=COPB2 PE=2 SV=1 - [B4DZI8_HUMAN]	62.83	4.68	4.56	6.16	7.98	5.47	4.56	2.05	9.01	5.02	3.65	1.48	7.41	1.37	3.76	6.5	4.45	10.83	7.41	3.31	3.42
A6NN80	Annexin OS=Homo sapiens GN=ANXA6 PE=2 SV=3 - [A6NN80_HUMAN]	62.82	3.3	9.15	2.55	3.75	3.75		4.65	1.65	7.2		4.65	4.05	11.84	4.35	2.4	5.25	5.1	3	1.5	6.45
O95721	Synaptosomal-associated protein 29 OS=Homo sapiens GN=SNAP29 PE=1 SV=1 - [SNP29_HUMAN]	62.79	4.65	7.75		5.04	17.44	16.67		8.14		3.88	5.43	3.49							7.75	11.63
P49915	GMP synthase [glutamine-hydrolyzing] OS=Homo sapiens GN=GMPS PE=1 SV=1 - [GUAA_HUMAN]	62.77	7.07	10.1	8.8	2.74	6.93	6.2	7.22	4.62	4.33	2.74	6.49	14.29	3.61	8.37	2.02	5.19	3.9	1.59	3.46	14.43
P49748	Very long-chain specific acyl-CoA dehydrogenase, mitochondrial OS=Homo sapiens GN=ACADVL PE=1 SV=1 - [ACADV_HUMAN]	62.75	10.08	3.97	8.7	4.73	12.06	9.47	13.44	14.35	5.04	5.8	9.16	10.69	10.38	14.05	10.38	12.21	8.4	9.92	10.69	5.8
P51397	Death-associated protein 1 OS=Homo sapiens GN=DAP PE=1 SV=3 - [DAP1_HUMAN]	62.75		22.55	22.55	47.06	22.55	22.55	30.39	27.45	27.45	27.45		27.45							27.45
Q08752	Peptidyl-prolyl cis-trans isomerase D OS=Homo sapiens GN=PPID PE=1 SV=3 - [PPID_HUMAN]	62.7	4.32	8.65	7.57	2.16	3.24	17.57	5.68	10	6.76	4.59	6.22	2.97				5.95	1.89	5.14	8.92	6.22
P31040	Succinate dehydrogenase [ubiquinone] flavoprotein subunit, mitochondrial OS=Homo sapiens GN=SDHA PE=1 SV=2 - [DHSA_HUMAN]	62.65	7.08	4.82		3.01	8.28	9.64	3.16	12.2	17.02	19.28	7.23	7.53	4.82	14.01	11.14	13.55	12.5	10.84	14.76	6.17
Q9Y3D9	28S ribosomal protein S23, mitochondrial OS=Homo sapiens GN=MRPS23 PE=1 SV=2 - [RT23_HUMAN]	62.63		6.32	7.89				5.26		12.63	18.95	18.95	10.53		18.95	13.68					10.53
H0YHC3	Nucleosome assembly protein 1-like 1 (Fragment) OS=Homo sapiens GN=NAP1L1 PE=2 SV=1 - [H0YHC3_HUMAN]	62.63					9.09	14.14	5.05		11.11	6.06	6.06	6.06	8.59	12.63	10.1	15.15	30.81	6.57	15.66
P20290	Transcription factor BTF3 OS=Homo sapiens GN=BTF3 PE=1 SV=1 - [BTF3_HUMAN]	62.62	13.59					19.9	27.67	18.45	18.93	7.77	2.91	14.08								17.48
J3KSZ0	Eukaryotic initiation factor 4A-I (Fragment) OS=Homo sapiens GN=EIF4A1 PE=3 SV=1 - [J3KSZ0_HUMAN]	62.61	13.48	5.22	3.04		6.09	16.09	11.74	35.22	27.39	28.7	35.22	10.43	19.13	20.87	26.96	16.09		32.17	5.65
P50579	Methionine aminopeptidase 2 OS=Homo sapiens GN=METAP2 PE=1 SV=1 - [AMPM2_HUMAN]	62.55	12.55	11.92	10.25		6.07	8.79							5.86	8.37	8.37	4.6	3.77	6.49	3.77	10.46
P31153	S-adenosylmethionine synthase isoform type-2 OS=Homo sapiens GN=MAT2A PE=1 SV=1 - [METK2_HUMAN]	62.53	14.43	7.09	12.15		3.8	3.8	3.8		3.8	12.41	8.61	2.78	13.67	4.05		5.32	11.14	14.94	2.28	7.09
P34897-3	Isoform 3 of Serine hydroxymethyltransferase, mitochondrial OS=Homo sapiens GN=SHMT2 - [GLYM_HUMAN]	62.53	12.42	6.21	8.07	2.69	11.8	8.7	11.39	7.25	14.29	14.08	2.07	8.9	13.66	10.56	12.01	15.73	9.94	10.97	10.56	6.63
P47756-2	Isoform 2 of F-actin-capping protein subunit beta OS=Homo sapiens GN=CAPZB - [CAPZB_HUMAN]	62.5	13.24	11.76	17.65	7.35	7.35	12.87	12.5	9.56	3.31	2.94	8.82	19.85	15.81	22.06	9.93	16.18	13.24	11.76	15.44	8.46
Q53H82	Beta-lactamase-like protein 2 OS=Homo sapiens GN=LACTB2 PE=1 SV=2 - [LACB2_HUMAN]	62.5		6.94		2.08	10.07	16.67	10.76	3.82	3.13	3.13		5.21	6.94	2.78				15.28	13.54	8.68
Q15738	Sterol-4-alpha-carboxylate 3-dehydrogenase, decarboxylating OS=Homo sapiens GN=NSDHL PE=1 SV=2 - [NSDHL_HUMAN]	62.47					16.89	26.54	2.95		3.49			6.43				4.56		4.56	6.97	11.26
Q14166	Tubulin--tyrosine ligase-like protein 12 OS=Homo sapiens GN=TTLL12 PE=1 SV=2 - [TTL12_HUMAN]	62.42	6.37	9.16	4.5		9.16	5.12	8.07	13.51	3.57	4.5	4.5	9.16	11.02	9.01	2.64	2.64		7.14	6.68	5.75
Q8WVJ2	NudC domain-containing protein 2 OS=Homo sapiens GN=NUDCD2 PE=1 SV=1 - [NUDC2_HUMAN]	62.42			11.46	11.46	11.46			10.83	17.2			7.01		5.73	21.02
Q9Y2S0	DNA-directed RNA polymerases I and III subunit RPAC2 OS=Homo sapiens GN=POLR1D PE=1 SV=1 - [RPAC2_HUMAN]	62.41		15.79	25.56				11.28	11.28			13.53		27.82	18.8	18.8					15.79
Q86U90	YrdC domain-containing protein, mitochondrial OS=Homo sapiens GN=YRDC PE=1 SV=1 - [YRDC_HUMAN]	62.37		4.66			16.49	10.75			6.45	5.38					4.3	4.3			14.34
P40938	Replication factor C subunit 3 OS=Homo sapiens GN=RFC3 PE=1 SV=2 - [RFC3_HUMAN]	62.36	6.74	2.25	2.25	6.18	1.69	2.53	2.53	4.21	2.81	8.99	3.37	5.9		3.09	15.17	16.57	8.43	3.65
P38117	Electron transfer flavoprotein subunit beta OS=Homo sapiens GN=ETFB PE=1 SV=3 - [ETFB_HUMAN]	62.35	3.53	4.71	8.24	10.98	18.04	16.47	13.73	11.76	14.51	11.37	5.1	9.8	8.63	8.63	24.31	20.39		3.92	3.92	10.98
Q9UHA2	SS18-like protein 2 OS=Homo sapiens GN=SS18L2 PE=2 SV=1 - [S18L2_HUMAN]	62.34	23.38															25.97	12.99
P32320	Cytidine deaminase OS=Homo sapiens GN=CDA PE=1 SV=2 - [CDD_HUMAN]	62.33	13.7					11.64	11.64	11.64		21.92	36.99	15.07	43.84
E9PMD8	26S protease regulatory subunit 6A (Fragment) OS=Homo sapiens GN=PSMC3 PE=2 SV=1 - [E9PMD8_HUMAN]	62.31	16.15	10.77	13.85	16.54	20	15				4.62	4.62	9.23	5.77	2.69			10	3.08	11.54	11.54
P08133	Annexin A6 OS=Homo sapiens GN=ANXA6 PE=1 SV=3 - [ANXA6_HUMAN]	62.26	3.27	9.06	2.53	3.71	3.71		7.58	1.63	7.13		4.61	1.04	11.74	4.31	2.38	5.2	5.05	2.97	1.49	6.39
P28066	Proteasome subunit alpha type-5 OS=Homo sapiens GN=PSMA5 PE=1 SV=3 - [PSA5_HUMAN]	62.24	9.13	7.88			2.9	7.88	28.63	16.18	4.98	4.98	9.13	9.13	20.33	4.15	13.28	8.3		5.39	8.3	7.88
P46940	Ras GTPase-activating-like protein IQGAP1 OS=Homo sapiens GN=IQGAP1 PE=1 SV=1 - [IQGA1_HUMAN]	62.22	5.37	9.41	7.54	7.85	9.35	8.99	8.33	10.2	9.11	8.63	2.96	5.91	9.17	11.47	8.81	4.71	6.28	12.25	17.5	10.86
Q15435	Protein phosphatase 1 regulatory subunit 7 OS=Homo sapiens GN=PPP1R7 PE=1 SV=1 - [PP1R7_HUMAN]	62.22	5	2.78	19.44	7.5	8.33	2.78	2.78	5.56	2.78		18.06		5.28	14.72	12.78	5	7.5	2.5		4.44
P13010	X-ray repair cross-complementing protein 5 OS=Homo sapiens GN=XRCC5 PE=1 SV=3 - [XRCC5_HUMAN]	62.16	7.65	21.99	15.44	16.8	8.74	5.87	2.32	13.11	7.1	1.09	7.79	13.66	12.84	6.42	2.87	4.92	3.69	11.48	7.51	21.86
P05388	60S acidic ribosomal protein P0 OS=Homo sapiens GN=RPLP0 PE=1 SV=1 - [RLA0_HUMAN]	62.15	3.79	10.41	3.47	13.25	20.5	23.03	26.5	13.88	11.67	15.77	6.62	2.21	7.26	4.1		5.05	13.25	20.19	18.3	21.14
P35232	Prohibitin OS=Homo sapiens GN=PHB PE=1 SV=1 - [PHB_HUMAN]	62.13	8.46			2.21		4.41	8.09	10.66	7.72	10.66	11.03	7.35	16.18	6.62	6.62	6.25	15.44	4.41	11.76
Q9BYG3	MKI67 FHA domain-interacting nucleolar phosphoprotein OS=Homo sapiens GN=MKI67IP PE=1 SV=1 - [MK67I_HUMAN]	62.12		17.75	2.39		4.1				8.87	13.31	10.92	11.26	9.56	6.83		3.75	8.53	9.9	6.14	3.41
P25815	Protein S100-P OS=Homo sapiens GN=S100P PE=1 SV=2 - [S100P_HUMAN]	62.11	17.89	55.79	24.21	31.58		13.68		31.58	17.89		33.68		33.68		13.68	13.68		13.68	41.05	51.58
P55735	Protein SEC13 homolog OS=Homo sapiens GN=SEC13 PE=1 SV=3 - [SEC13_HUMAN]	62.11	3.42	4.66			8.07	11.49	8.07	11.18	3.73	13.66	5.28		3.42		3.42	19.57	7.14	2.8	2.8
P22061	Protein-L-isoaspartate(D-aspartate) O-methyltransferase OS=Homo sapiens GN=PCMT1 PE=1 SV=4 - [PIMT_HUMAN]	62.11		6.61	4.41	4.41			8.37	8.81	14.54	6.17	32.6	7.49	26.43			5.73		7.49	7.49	6.61
Q9NX24	H/ACA ribonucleoprotein complex subunit 2 OS=Homo sapiens GN=NHP2 PE=1 SV=1 - [NHP2_HUMAN]	62.09	12.42							12.42	12.42	12.42	16.34	12.42	16.34					37.25
P12235	ADP/ATP translocase 1 OS=Homo sapiens GN=SLC25A4 PE=1 SV=4 - [ADT1_HUMAN]	62.08	10.4	15.77	17.11	19.8	14.43	17.45	9.06	11.74	5.37	8.39	14.43	8.39	15.44	11.07	14.09	11.41	14.43	8.05	11.07	13.76
P40763	Signal transducer and activator of transcription 3 OS=Homo sapiens GN=STAT3 PE=1 SV=2 - [STAT3_HUMAN]	62.08	3.25	11.3	7.14	1.69	1.69	5.19	3.25	4.55	5.58	9.48	3.25	2.34	5.71	5.71	3.12	5.32	6.36	5.71	1.56	10.52
P12004	Proliferating cell nuclear antigen OS=Homo sapiens GN=PCNA PE=1 SV=1 - [PCNA_HUMAN]	62.07	8.43	7.66	2.68	4.98	10.73	8.05	3.07	14.94	3.07	14.56	8.81	16.48	13.79	25.67	28.35	24.14		11.11	7.66	7.66
P39019	40S ribosomal protein S19 OS=Homo sapiens GN=RPS19 PE=1 SV=2 - [RS19_HUMAN]	62.07	15.17	11.03	7.59	7.59	15.17	12.41	6.9	14.48	15.86	22.76	6.9	22.07	13.1	15.17	4.83	18.62	11.72	6.9	18.62	31.03
P10768	S-formylglutathione hydrolase OS=Homo sapiens GN=ESD PE=1 SV=2 - [ESTD_HUMAN]	62.06	10.99					14.89	14.54	14.54	6.74	4.61	7.45	2.84	12.77	8.16	12.06	4.26			12.06
P62280	40S ribosomal protein S11 OS=Homo sapiens GN=RPS11 PE=1 SV=3 - [RS11_HUMAN]	62.03	4.43	11.39	6.33	11.39	16.46	5.06	4.43			24.05	17.09	5.06	22.15	6.33	11.39	11.39	18.35	12.03	13.92	19.62
P32969	60S ribosomal protein L9 OS=Homo sapiens GN=RPL9 PE=1 SV=1 - [RL9_HUMAN]	61.98		5.21				27.08	34.38	44.27	30.21	26.56	44.79	34.38	21.35	18.75	9.9	28.65	17.19	9.9		5.21
O15514	DNA-directed RNA polymerase II subunit RPB4 OS=Homo sapiens GN=POLR2D PE=1 SV=1 - [RPB4_HUMAN]	61.97			11.27									10.56		24.65			25.35	25.35		13.38
P42166	Lamina-associated polypeptide 2, isoform alpha OS=Homo sapiens GN=TMPO PE=1 SV=2 - [LAP2A_HUMAN]	61.96	6.63	9.22	7.35	11.67	9.94	5.62	5.62	14.55		3.46	3.46	9.51	3.6	6.05	14.12	10.52	2.88	5.48	5.04	2.45
P49411	Elongation factor Tu, mitochondrial OS=Homo sapiens GN=TUFM PE=1 SV=2 - [EFTU_HUMAN]	61.95	7.52	14.82	16.37	13.5	14.82	19.25	13.05	14.16	19.69	21.46	5.31	20.35	22.79	19.03	9.51	9.96	16.15	18.36	15.04	14.82
P08397-2	Isoform 2 of Porphobilinogen deaminase OS=Homo sapiens GN=HMBS - [HEM3_HUMAN]	61.92			2.62	6.98		3.2	11.05	7.56	13.95	6.1	13.95	9.3	3.2	7.27		4.94	4.94		6.1
P01112	GTPase HRas OS=Homo sapiens GN=HRAS PE=1 SV=1 - [RASH_HUMAN]	61.9			7.94	7.94			13.76	13.76				13.76		18.52	22.22				13.23	13.23
Q00610-2	Isoform 2 of Clathrin heavy chain 1 OS=Homo sapiens GN=CLTC - [CLH1_HUMAN]	61.87	7.38	4.64	3.9	5.49	10.74	8.18	10.43	12.08	17.39	11.96	10.49	8.91	10.56	9.64	6.71	7.26	9.52	11.71	9.27	9.21
P62316	Small nuclear ribonucleoprotein Sm D2 OS=Homo sapiens GN=SNRPD2 PE=1 SV=1 - [SMD2_HUMAN]	61.86	20.34	24.58					8.47	8.47				22.88	22.88	31.36	45.76	21.19		16.1	16.1	24.58
Q9P0L0	Vesicle-associated membrane protein-associated protein A OS=Homo sapiens GN=VAPA PE=1 SV=3 - [VAPA_HUMAN]	61.85	4.42	10.44	8.84	10.44	16.87	5.62	8.84			6.43		4.42	10.84	5.62	27.31	24.1	22.09	17.27	9.64	6.83
P62195	26S protease regulatory subunit 8 OS=Homo sapiens GN=PSMC5 PE=1 SV=1 - [PRS8_HUMAN]	61.82	8.87	12.56	4.43		8.13	14.53	2.96	10.84	3.94	6.65	6.9	9.85	10.34	10.1	11.58	7.88	6.9	8.37	19.7	21.92
P08559	Pyruvate dehydrogenase E1 component subunit alpha, somatic form, mitochondrial OS=Homo sapiens GN=PDHA1 PE=1 SV=3 - [ODPA_HUMAN]	61.79	5.13	7.95			12.31	8.46	3.33	7.95	7.44	14.1		8.97	2.31	12.82	2.05	2.82		8.72	2.05	10
Q16836	Hydroxyacyl-coenzyme A dehydrogenase, mitochondrial OS=Homo sapiens GN=HADH PE=1 SV=3 - [HCDH_HUMAN]	61.78	6.05	15.92		2.87				3.5	10.51	4.46						7.01	8.28		19.43	7.64
C9J406	Mitochondrial inner membrane protein OS=Homo sapiens GN=IMMT PE=2 SV=1 - [C9J406_HUMAN]	61.76	7.44	9.71	4.55	6.07	3.79	5.92	5.77	7.59	10.17	14.11	10.62	6.98	8.04	11.23	10.77	15.33	7.89	5.77	2.73	7.13
P30740	Leukocyte elastase inhibitor OS=Homo sapiens GN=SERPINB1 PE=1 SV=1 - [ILEU_HUMAN]	61.74	2.64	10.55	13.46	3.96	2.37	2.37	6.6	12.66	13.98	8.18	8.18	8.97	5.54	8.97	10.55	11.08	11.61	17.15	2.64	12.66
C9J4W5	Eukaryotic translation initiation factor 5A-2 (Fragment) OS=Homo sapiens GN=EIF5A2 PE=2 SV=1 - [C9J4W5_HUMAN]	61.74	10.43	25.22	39.13	39.13	33.91	26.09	26.09	26.96	26.96	36.52	30.43	10.43	25.22	26.09	26.09	10.43	10.43	10.43	10.43	37.39
P42167	Lamina-associated polypeptide 2, isoforms beta/gamma OS=Homo sapiens GN=TMPO PE=1 SV=2 - [LAP2B_HUMAN]	61.67	11.45	14.76	11.23	11.23	11.45	11.45	8.15	12.11	5.95			5.73		10.79	10.57	2.86	8.15	3.96	3.96	6.17
Q96H79	Zinc finger CCCH-type antiviral protein 1-like OS=Homo sapiens GN=ZC3HAV1L PE=1 SV=2 - [ZCCHL_HUMAN]	61.67		10.33	10.33		11.67		7.67				11	7	11			3.67		6.67	3.67	6.67
P11908	Ribose-phosphate pyrophosphokinase 2 OS=Homo sapiens GN=PRPS2 PE=1 SV=2 - [PRPS2_HUMAN]	61.64	10.38	9.75	11.32	13.52	6.6			5.03	5.35	8.49	7.86	15.09	12.58	13.52	6.29			7.86	3.77	2.52
P22102	Trifunctional purine biosynthetic protein adenosine-3 OS=Homo sapiens GN=GART PE=1 SV=1 - [PUR2_HUMAN]	61.58	9.7	11.98	5.25	6.44	6.34	7.72	6.34	4.26	4.95	4.75	9.21	8.81	9.21	12.67	6.83	6.63	11.78	11.78	16.34	6.93
Q96HE7	ERO1-like protein alpha OS=Homo sapiens GN=ERO1L PE=1 SV=2 - [ERO1A_HUMAN]	61.54	8.55	5.13	10.47	8.12		3.42	6.2		3.63	6.62	2.99	7.91	2.35	7.91	7.26	2.99	6.84	4.49	8.33	2.35
O43768-2	Isoform 2 of Alpha-endosulfine OS=Homo sapiens GN=ENSA - [ENSA_HUMAN]	61.54			13.68	13.68	15.38						14.53		14.53	6.84	26.5	10.26	9.4	9.4	9.4	5.98
Q9UHX1-2	Isoform 2 of Poly(U)-binding-splicing factor PUF60 OS=Homo sapiens GN=PUF60 - [PUF60_HUMAN]	61.44	5.9	7.75	2.03	1.48	4.98	9.23	3.87	9.04	1.48	5.17	9.96	8.86	14.39	8.67	7.93	2.21	2.95	15.13	2.95	2.03
O75368	SH3 domain-binding glutamic acid-rich-like protein OS=Homo sapiens GN=SH3BGRL PE=1 SV=1 - [SH3L1_HUMAN]	61.4	8.77	11.4				14.04		11.4										15.79
Q86UY0	TXNDC5 protein OS=Homo sapiens GN=TXNDC5 PE=2 SV=1 - [Q86UY0_HUMAN]	61.39	11.94	6.94	6.94	7.5	24.17	24.17	30.56	20.28	4.44	8.61	11.94	14.17	11.67	5.28	15.56	7.22	5.83	7.78	3.33	8.61
O75828	Carbonyl reductase [NADPH] 3 OS=Homo sapiens GN=CBR3 PE=1 SV=3 - [CBR3_HUMAN]	61.37				5.78	5.78	2.53		10.11	5.78	2.89	12.64	5.42	3.61	10.83	4.69	2.17	7.94	3.97		9.03
O15372	Eukaryotic translation initiation factor 3 subunit H OS=Homo sapiens GN=EIF3H PE=1 SV=1 - [EIF3H_HUMAN]	61.36	8.81	2.56	2.27		3.13	10.51	11.65	11.08	15.91	10.23		11.93	5.11	3.98	15.34	15.34	9.66	2.56		5.4
P62081	40S ribosomal protein S7 OS=Homo sapiens GN=RPS7 PE=1 SV=1 - [RS7_HUMAN]	61.34	11.34	4.64	15.98		11.34	16.49	21.13	24.74	22.16	6.7	17.53	8.25	26.29	8.25	26.8	17.01	17.01	6.19	21.65	20.1
Q05639	Elongation factor 1-alpha 2 OS=Homo sapiens GN=EEF1A2 PE=1 SV=1 - [EF1A2_HUMAN]	61.34	24.62	25.7	15.98	15.12	14.04	22.46	20.95	38.66	29.16	31.97	23.33	10.8	22.03	8.86	12.74	27.21	17.28	28.94	27.86	17.71
P61978	Heterogeneous nuclear ribonucleoprotein K OS=Homo sapiens GN=HNRNPK PE=1 SV=1 - [HNRPK_HUMAN]	61.34	9.07	4.1	11.45	14.25	15.55	18.57	25.27	23.97	18.57	9.5	7.34	10.58	11.45	10.15	9.5	7.78	11.02	16.2	11.23	15.33
Q9UL26	Ras-related protein Rab-22A OS=Homo sapiens GN=RAB22A PE=1 SV=2 - [RB22A_HUMAN]	61.34				7.22	10.82		15.98						13.4		5.67	8.25	6.7
Q86UP2	Kinectin OS=Homo sapiens GN=KTN1 PE=1 SV=1 - [KTN1_HUMAN]	61.31	6.41	7.52	8.7	4.64	7.74	13.12	7.96	4.79	3.24	3.91	3.91	4.57	3.17	7.89	7.59	11.13	6.04	2.36	6.41	8.7
Q14847	LIM and SH3 domain protein 1 OS=Homo sapiens GN=LASP1 PE=1 SV=2 - [LASP1_HUMAN]	61.3	3.83	3.83		8.81	17.24	8.43	10.34	5.75	7.66	12.26	3.83	18.01	3.83	7.66	4.98			15.71	9.96	4.6
O75380	NADH dehydrogenase [ubiquinone] iron-sulfur protein 6, mitochondrial OS=Homo sapiens GN=NDUFS6 PE=1 SV=1 - [NDUS6_HUMAN]	61.29		19.35		19.35	11.29	12.1	12.1		12.1					9.68			17.74			19.35
P05198	Eukaryotic translation initiation factor 2 subunit 1 OS=Homo sapiens GN=EIF2S1 PE=1 SV=3 - [IF2A_HUMAN]	61.27	25.71	20	9.21		2.86	3.17	10.16	4.13				19.37	13.02	31.11	26.03	3.49	13.97	14.92	18.73	7.62
O00170	AH receptor-interacting protein OS=Homo sapiens GN=AIP PE=1 SV=2 - [AIP_HUMAN]	61.21	4.55				12.73	20	8.48	3.64	7.88	3.64	3.33	5.76		3.03				9.7	3.94
O00410-2	Isoform 2 of Importin-5 OS=Homo sapiens GN=IPO5 - [IPO5_HUMAN]	61.14	4.44	9.74	4.24	2.89	2.7	9.35	8.39	6.27	6.17	10.61	8.1	4.34	7.81	5.59	6.56	13.79	16.78	7.33	10.22	13.02
Q07065	Cytoskeleton-associated protein 4 OS=Homo sapiens GN=CKAP4 PE=1 SV=2 - [CKAP4_HUMAN]	61.13	10.3	8.64	8.47	8.47	10.8	11.63	11.46	10.8	10.47	6.15	6.15	8.8	17.94	8.47	9.8	11.79	11.13	3.49	5.48	10.8
Q9NZL9	Methionine adenosyltransferase 2 subunit beta OS=Homo sapiens GN=MAT2B PE=1 SV=1 - [MAT2B_HUMAN]	61.08	2.69	3.59	10.18	7.49		13.47	6.59			10.18	6.89	2.99		6.59	6.29	7.49	14.97		5.09	3.59
P07203	Glutathione peroxidase 1 OS=Homo sapiens GN=GPX1 PE=1 SV=4 - [GPX1_HUMAN]	61.08		4.43			15.27		4.93			5.42	8.87	22.17				13.79	4.43
P55263	Adenosine kinase OS=Homo sapiens GN=ADK PE=1 SV=2 - [ADK_HUMAN]	61.05	14.64			5.8	3.04	3.04	12.15	16.57	8.56	12.98	9.67	20.17	10.5	11.33	7.73		6.08	6.08	6.63	1.66
P08238	Heat shock protein HSP 90-beta OS=Homo sapiens GN=HSP90AB1 PE=1 SV=4 - [HS90B_HUMAN]	61.05	16.71	23.76	21.27	23.48	18.92	24.31	26.38	22.1	10.64	16.16	24.59	23.2	21.69	25.83	24.45	21.13	20.58	23.2	24.72	24.72
P41208	Centrin-2 OS=Homo sapiens GN=CETN2 PE=1 SV=1 - [CETN2_HUMAN]	61.05		6.98	6.98			7.56	7.56	17.44			29.07		19.19					9.88	9.88
G3V576	Heterogeneous nuclear ribonucleoproteins C1/C2 OS=Homo sapiens GN=HNRNPC PE=2 SV=1 - [G3V576_HUMAN]	61.04	3.03	14.29	9.96	14.29	14.72	25.97	21.21	25.97	18.61	18.18	13.42	3.9	8.66	3.46	8.23	26.84	19.48	12.99	25.97	18.18
P07237	Protein disulfide-isomerase OS=Homo sapiens GN=P4HB PE=1 SV=3 - [PDIA1_HUMAN]	61.02	11.42	8.66	10.63	13.58	12.99	8.07	14.96	25	12.4	11.42	6.69	11.81	7.87	12.01	12.01	11.61	15.55	14.96	23.43	16.34
P26599	Polypyrimidine tract-binding protein 1 OS=Homo sapiens GN=PTBP1 PE=1 SV=1 - [PTBP1_HUMAN]	61.02	19.96	6.78		11.11	23.54	15.63	9.04	9.04	20.15	3.77	3.58	22.79	15.44	17.51	10.17	16.57	9.04	6.59	5.08	5.27
P20338	Ras-related protein Rab-4A OS=Homo sapiens GN=RAB4A PE=1 SV=3 - [RAB4A_HUMAN]	61.01	5.05	5.05		13.3	7.34	11.01			13.3		6.42		11.47	5.05		13.3			10.09	5.05
Q9BRA2	Thioredoxin domain-containing protein 17 OS=Homo sapiens GN=TXNDC17 PE=1 SV=1 - [TXD17_HUMAN]	60.98		11.38	11.38		8.13	24.39	16.26			7.32	7.32		11.38	6.5		11.38	11.38			11.38
Q92598	Heat shock protein 105 kDa OS=Homo sapiens GN=HSPH1 PE=1 SV=1 - [HS105_HUMAN]	60.96	8.28	3.85	5.48	3.15	6.29	5.94	3.5	9.67	6.53	5.94	8.97	5.59	6.76	5.83	4.78	6.41	7.81	9.09	4.55	5.36
P40939	Trifunctional enzyme subunit alpha, mitochondrial OS=Homo sapiens GN=HADHA PE=1 SV=2 - [ECHA_HUMAN]	60.94	6.16	9.7	9.04	9.57	6.03	10.48	8.39	5.11	12.71	5.9	4.59	3.15	16.91	3.28	3.67	4.72	7.86	15.73	7.34	10.62
Q15149-9	Isoform 9 of Plectin OS=Homo sapiens GN=PLEC - [PLEC_HUMAN]	60.93	8.49	9.27	6.84	6.99	8.32	8.52	5.76	7.65	4.35	7.72	7.5	10.13	8.54	9.16	5.82	6.38	6.68	10.02	8.29	8.52
Q15149-8	Isoform 8 of Plectin OS=Homo sapiens GN=PLEC - [PLEC_HUMAN]	60.93	8.51	9.28	6.85	7.01	8.33	8.53	5.77	7.67	4.35	7.73	7.51	10.14	8.55	9.17	6.12	6.39	6.3	10.03	8.31	8.53
F5GZS6	4F2 cell-surface antigen heavy chain OS=Homo sapiens GN=SLC3A2 PE=2 SV=1 - [F5GZS6_HUMAN]	60.93	11.52	9.35	17.03	10.02	16.69	17.53	13.69	10.35	19.87	18.7	11.19	11.19	18.7	3.01		8.51	11.19	17.03	12.85	9.68
O15511	Actin-related protein 2/3 complex subunit 5 OS=Homo sapiens GN=ARPC5 PE=1 SV=3 - [ARPC5_HUMAN]	60.93					7.95	7.95			8.61					35.1	35.76	23.18	3.97			4.64
O75367-3	Isoform 3 of Core histone macro-H2A.1 OS=Homo sapiens GN=H2AFY - [H2AY_HUMAN]	60.92	5.39	15.63	3.5	3.5	3.5	15.36	9.97	10.78	5.39	2.7	2.7	8.36	16.71	5.39	8.36	8.89	5.93	8.36	8.36	5.66
Q7RTV0	PHD finger-like domain-containing protein 5A OS=Homo sapiens GN=PHF5A PE=1 SV=1 - [PHF5A_HUMAN]	60.91		20.91	11.82	11.82	28.18				6.36	6.36							8.18
Q7KZF4	Staphylococcal nuclease domain-containing protein 1 OS=Homo sapiens GN=SND1 PE=1 SV=1 - [SND1_HUMAN]	60.88	7.36	6.59	5.71	2.2	2.86	2.09	3.74	9.34	9.45	10.88	2.75	6.92	11.43	4.84	5.16	6.81	5.6	8.9	7.58	7.91
Q9UHB6	LIM domain and actin-binding protein 1 OS=Homo sapiens GN=LIMA1 PE=1 SV=1 - [LIMA1_HUMAN]	60.87	2.24	3.29	5.67	6.06	4.35	1.84	4.22	3.95	13.57	9.62	2.5	2.77	4.48	2.77	5.8	6.46	5.67	11.33	5.27	13.04
G5E972	Thymopentin OS=Homo sapiens GN=TMPO PE=2 SV=1 - [G5E972_HUMAN]	60.87	12.56	16.18	12.32	15.46	12.56	12.56	6.76	14.49	4.35			6.28		6.28	11.59	3.14	3.14	4.35	4.35	6.76
P52907	F-actin-capping protein subunit alpha-1 OS=Homo sapiens GN=CAPZA1 PE=1 SV=3 - [CAZA1_HUMAN]	60.84	10.49	22.73	13.29	13.29						9.09	15.03	13.29	16.08					14.69	11.19	20.28
Q15149-4	Isoform 4 of Plectin OS=Homo sapiens GN=PLEC - [PLEC_HUMAN]	60.83	8.47	9.24	6.82	6.97	8.29	8.49	5.74	7.63	4.33	7.7	7.48	10.38	8.51	9.13	6	6.36	6.27	9.98	8.27	8.49
Q16539-2	Isoform CSBP1 of Mitogen-activated protein kinase 14 OS=Homo sapiens GN=MAPK14 - [MK14_HUMAN]	60.83		15	8.33					3.06	3.06	10.28	13.89		6.67		4.17		2.22	2.22	10.56	5.56
Q13636	Ras-related protein Rab-31 OS=Homo sapiens GN=RAB31 PE=1 SV=1 - [RAB31_HUMAN]	60.82		7.73	11.34	8.25					5.15		10.82	7.22	5.67	7.22	5.67					6.7
O76071	Probable cytosolic iron-sulfur protein assembly protein CIAO1 OS=Homo sapiens GN=CIAO1 PE=1 SV=1 - [CIAO1_HUMAN]	60.77				3.54	5.31	10.91			5.9		2.95		2.95		7.08	7.96	24.78	12.98	8.26
Q5T6W5	Heterogeneous nuclear ribonucleoprotein K OS=Homo sapiens GN=HNRNPK PE=2 SV=1 - [Q5T6W5_HUMAN]	60.75	9.81	7.24	12.38	15.42	16.82	20.09	18.93	17.52	20.09	10.28	7.94	11.45	12.38	10.98	10.28	8.41	11.92	20.33	12.15	19.39
H7C2U0	T-complex protein 1 subunit theta (Fragment) OS=Homo sapiens GN=CCT8 PE=4 SV=1 - [H7C2U0_HUMAN]	60.75				10.28	10.28	10.28	10.28	10.28	10.28	23.36	10.28	9.35	10.28	8.41	8.41	19.63	13.08	13.08	13.08	13.08
Q9NZM1-6	Isoform 6 of Myoferlin OS=Homo sapiens GN=MYOF - [MYOF_HUMAN]	60.74	7.71	6.15	1.9	6.1	5.76	4.2	3.86	4.3	5.52	4.69	6.01	4.54	9.03	7.91	4.35	3.91	5.96	7.67	8.74	7.08
Q9NZL9-2	Isoform 2 of Methionine adenosyltransferase 2 subunit beta OS=Homo sapiens GN=MAT2B - [MAT2B_HUMAN]	60.68	2.79	3.72	15.79	7.74	5.57	10.22	6.81			7.12	7.12	3.1		3.1	6.5	3.41	11.15		5.26	3.72
P43304	Glycerol-3-phosphate dehydrogenase, mitochondrial OS=Homo sapiens GN=GPD2 PE=1 SV=3 - [GPDM_HUMAN]	60.66	5.5	5.5	1.65	5.36	4.95		2.48	11.14	6.88	7.29	3.16	1.79	2.2	3.58	2.2	4.13	10.87	6.46	5.78	3.44
Q14232	Translation initiation factor eIF-2B subunit alpha OS=Homo sapiens GN=EIF2B1 PE=1 SV=1 - [EI2BA_HUMAN]	60.66		5.57	5.57		2.62		3.28	14.75	10.82	17.05	13.77	3.61	20.33	9.51		2.3	3.93			5.57
Q06323	Proteasome activator complex subunit 1 OS=Homo sapiens GN=PSME1 PE=1 SV=1 - [PSME1_HUMAN]	60.64	11.65				8.43	8.84	16.47	23.29	8.43	4.82	8.84	4.02	9.64			10.04	10.04	8.84	8.43	13.65
Q9C005	Protein dpy-30 homolog OS=Homo sapiens GN=DPY30 PE=1 SV=1 - [DPY30_HUMAN]	60.61	11.11									20.2			29.29
P31948	Stress-induced-phosphoprotein 1 OS=Homo sapiens GN=STIP1 PE=1 SV=1 - [STIP1_HUMAN]	60.59	5.52		4.6	9.39	10.87	14.36	20.44	11.79	13.08	9.39	7.37	11.05	6.45	9.21	9.58	14.55	11.6	8.47	1.84	4.79
Q15149-6	Isoform 6 of Plectin OS=Homo sapiens GN=PLEC - [PLEC_HUMAN]	60.58	8.46	9.23	6.81	6.97	8.57	8.48	5.74	7.62	4.33	7.69	7.47	10.09	8.5	9.12	5.8	6.35	6.26	9.98	8.26	8.48
Q02750	Dual specificity mitogen-activated protein kinase kinase 1 OS=Homo sapiens GN=MAP2K1 PE=1 SV=2 - [MP2K1_HUMAN]	60.56	21.12	12.98	9.41	8.91				2.8	2.29	2.04	6.62	5.6	6.62	13.23	3.05	8.4	3.05	3.05	9.67	8.4
I3L459	Phosphatidylinositol transfer protein alpha isoform (Fragment) OS=Homo sapiens GN=PITPNA PE=2 SV=1 - [I3L459_HUMAN]	60.56		4.93		8.45	11.97	11.97		4.23	4.23		20.42					4.93	14.08
Q5QNZ2	ATP synthase subunit b, mitochondrial OS=Homo sapiens GN=ATP5F1 PE=2 SV=1 - [Q5QNZ2_HUMAN]	60.51	11.79	6.15	6.15	26.67	20	8.21		6.15	5.64	5.64	7.18		14.87	6.15	10.26	22.56	26.67
P33992	DNA replication licensing factor MCM5 OS=Homo sapiens GN=MCM5 PE=1 SV=5 - [MCM5_HUMAN]	60.49	3	5.86	3.95		3.41	5.86	6.95	6.95	3.13	2.72	7.49	4.36	8.58	10.49	9.13	5.99	3.41	3.41	13.35	3.95
O43172-2	Isoform 2 of U4/U6 small nuclear ribonucleoprotein Prp4 OS=Homo sapiens GN=PRPF4 - [PRP4_HUMAN]	60.46		2.5	2.5	3.65	13.24	10.75	6.14	2.69	2.3	5.95	1.92	2.5		9.4	2.3	5.76	5.76	2.3		6.53
Q9Y6G9	Cytoplasmic dynein 1 light intermediate chain 1 OS=Homo sapiens GN=DYNC1LI1 PE=1 SV=3 - [DC1L1_HUMAN]	60.42	11.47	8.99	5.35	4.4	5.93	3.63		3.06	10.33	9.37	4.97	2.49	9.37	4.97	4.97	2.87	2.87	5.35		2.49
Q9NP97	Dynein light chain roadblock-type 1 OS=Homo sapiens GN=DYNLRB1 PE=1 SV=3 - [DLRB1_HUMAN]	60.42	8.33		9.38	21.88	12.5			16.67	16.67								21.88
Q9UNE7	E3 ubiquitin-protein ligase CHIP OS=Homo sapiens GN=STUB1 PE=1 SV=2 - [CHIP_HUMAN]	60.4		5.94	3.96	12.21	7.92	7.92	7.92	3.63	12.87	10.23	3.3				8.91	9.24	7.26	3.96	6.6	9.9
P23919	Thymidylate kinase OS=Homo sapiens GN=DTYMK PE=1 SV=4 - [KTHY_HUMAN]	60.38	3.77	10.38					5.66	11.79	9.91	4.25	18.4		12.26		13.68	22.17	5.19	7.55	4.72	10.38
P23921	Ribonucleoside-diphosphate reductase large subunit OS=Homo sapiens GN=RRM1 PE=1 SV=1 - [RIR1_HUMAN]	60.35	8.21	13.51	8.46		1.64	8.08	12.12	13.38	14.14	4.92	10.98	7.2	14.65	3.54	8.33	12.5	10.98	16.67	14.65	14.39
Q96P11-2	Isoform 2 of Putative methyltransferase NSUN5 OS=Homo sapiens GN=NSUN5 - [NSUN5_HUMAN]	60.3	2.36		4.94	4.51	1.72	4.72	6.44	8.37	5.36	5.36	3.43	7.3	1.93	10.94	9.66	4.51	5.36		1.5	2.36
P62873	Guanine nucleotide-binding protein G(I)/G(S)/G(T) subunit beta-1 OS=Homo sapiens GN=GNB1 PE=1 SV=3 - [GBB1_HUMAN]	60.29	3.24			13.24	3.82		6.18	12.94	10	2.94		8.53	3.24	8.82	5.59	5.29	5.88	10	6.18
Q9H9P8	L-2-hydroxyglutarate dehydrogenase, mitochondrial OS=Homo sapiens GN=L2HGDH PE=1 SV=3 - [L2HDH_HUMAN]	60.26	1.73	2.16	1.94			2.16	4.32	10.8	2.38	5.62	5.18		2.16		2.59	7.78	6.05	10.8	7.56	5.83
Q02127	Dihydroorotate dehydrogenase (quinone), mitochondrial OS=Homo sapiens GN=DHODH PE=1 SV=3 - [PYRD_HUMAN]	60.25			2.53	8.86		4.81			5.57	2.03	2.78	3.29			8.61	7.59	7.09	13.42	3.54
P38646	Stress-70 protein, mitochondrial OS=Homo sapiens GN=HSPA9 PE=1 SV=2 - [GRP75_HUMAN]	60.24	11.34	24.01	17.53	26.8	18.56	8.39	9.87	8.39	5.89	2.21	6.48		13.55	11.49	4.57	7.22	14.58	21.8	18.26	22.09
Q9NX74	tRNA-dihydrouridine(20) synthase [NAD(P)+]-like OS=Homo sapiens GN=DUS2L PE=1 SV=1 - [DUS2L_HUMAN]	60.24	3.45	1.62		6.69	2.23		5.88	6.9		5.07	2.64	4.87	4.87	7.1	3.25	1.83	7.51	1.42		6.69
O60547	GDP-mannose 4,6 dehydratase OS=Homo sapiens GN=GMDS PE=1 SV=1 - [GMDS_HUMAN]	60.22	5.91	5.65						6.45	18.82	7.53	5.11	12.9	8.87	6.72	2.15			7.53	5.11
Q15286	Ras-related protein Rab-35 OS=Homo sapiens GN=RAB35 PE=1 SV=1 - [RAB35_HUMAN]	60.2	5.47	5.47			6.97	10.45			5.47	14.93	14.93	8.46	16.92	10.45	7.46			5.47	5.47	5.47
Q9BRX5	DNA replication complex GINS protein PSF3 OS=Homo sapiens GN=GINS3 PE=1 SV=1 - [PSF3_HUMAN]	60.19	6.94			4.63	3.24				3.7	6.48		7.41		22.22	3.7			12.96	4.17
P42704	Leucine-rich PPR motif-containing protein, mitochondrial OS=Homo sapiens GN=LRPPRC PE=1 SV=3 - [LPPRC_HUMAN]	60.19	3.73	5.09	6.31	2.22	7.39	6.46	5.02	5.45	4.45	7.03	8.61	7.25	9.68	5.02	6.1	3.8	7.1	6.81	9.61	10.04
C9JQN7	Eukaryotic translation initiation factor 3 subunit B (Fragment) OS=Homo sapiens GN=EIF3B PE=2 SV=1 - [C9JQN7_HUMAN]	60.13		22.22					10.46	5.88			7.84	7.84	25.49						6.54	5.88
Q9Y277	Voltage-dependent anion-selective channel protein 3 OS=Homo sapiens GN=VDAC3 PE=1 SV=1 - [VDAC3_HUMAN]	60.07	10.6		3.89	4.59	3.89	4.59	6.36		9.19	11.66	3.53	10.25	15.55	12.37	8.13	8.13	3.53		12.01
O00410	Importin-5 OS=Homo sapiens GN=IPO5 PE=1 SV=4 - [IPO5_HUMAN]	60.07	4.19	9.21	4.01	2.73	2.55	8.84	7.93	5.93	7.38	10.76	7.66	3.46	7.38	5.29	6.2	14.31	15.86	8.3	11.03	13.67
P35998	26S protease regulatory subunit 7 OS=Homo sapiens GN=PSMC2 PE=1 SV=3 - [PRS7_HUMAN]	60.05	4.62	10.16	10.62	5.77		8.08	10.39	2.77	5.77	7.62	8.78		13.86	3.23	4.62	7.62	14.32	11.78	12.93	21.48
Q15149	Plectin OS=Homo sapiens GN=PLEC PE=1 SV=3 - [PLEC_HUMAN]	60.03	8.22	8.97	6.62	6.77	8.05	8.24	5.57	7.41	4.21	7.47	7.26	9.8	8.26	9.03	5.83	7.11	6.08	9.69	8.18	8.24
B1AJY5	26S proteasome non-ATPase regulatory subunit 10 OS=Homo sapiens GN=PSMD10 PE=2 SV=1 - [B1AJY5_HUMAN]	60	8.11	14.59	14.59	6.49	18.38	19.46	7.57		9.73	9.73		13.51	4.32	9.19	9.19	9.19		15.68
Q49B96	Cytochrome c oxidase assembly protein COX19 OS=Homo sapiens GN=COX19 PE=1 SV=1 - [COX19_HUMAN]	60		21.11	11.11			11.11			23.33	13.33		14.44
I3L1Z9	Ankyrin repeat and FYVE domain-containing protein 1 (Fragment) OS=Homo sapiens GN=ANKFY1 PE=2 SV=1 - [I3L1Z9_HUMAN]	60							28.33								31.67
Q15149-3	Isoform 3 of Plectin OS=Homo sapiens GN=PLEC - [PLEC_HUMAN]	59.96	8.69	8.99	6.59	6.74	8.25	8.45	5.71	7.59	4.31	7.66	7.29	10.04	8.58	9.08	5.78	6.32	6.24	9.93	8.23	8.25
P49419-2	Isoform 2 of Alpha-aminoadipic semialdehyde dehydrogenase OS=Homo sapiens GN=ALDH7A1 - [AL7A1_HUMAN]	59.88	3.33	10.37	2.94	4.7	4.11	6.65	11.55	7.44	13.7	9.78	5.28	7.44	11.35	6.07	5.68	1.96	10.76	2.74	5.48	8.22
E5RGS4	Prefoldin subunit 1 OS=Homo sapiens GN=PFDN1 PE=2 SV=1 - [E5RGS4_HUMAN]	59.83		35.9	8.55					20.51	20.51			17.95		8.55		7.69	13.68			6.84
H0YNK8	ER membrane protein complex subunit 4 OS=Homo sapiens GN=EMC4 PE=2 SV=1 - [H0YNK8_HUMAN]	59.8						12.75				9.8		11.76		9.8					15.69	15.69
K7EQU4	Scaffold attachment factor B2 (Fragment) OS=Homo sapiens GN=SAFB2 PE=4 SV=1 - [K7EQU4_HUMAN]	59.77	37.93									21.84		19.54
Q9Y490	Talin-1 OS=Homo sapiens GN=TLN1 PE=1 SV=3 - [TLN1_HUMAN]	59.74	6.34	6.73	5.19	5.94	5.16	7.04	3.07	4.29	3.82	3.35	3.58	6.06	8.7	7.71	5.47	10.27	10.43	8.89	3.82	5.47
Q9UHV9	Prefoldin subunit 2 OS=Homo sapiens GN=PFDN2 PE=1 SV=1 - [PFD2_HUMAN]	59.74	6.49			16.23	9.09	9.09	21.43	21.43					6.49	5.84	15.58	15.58		14.94	18.83
P13674	Prolyl 4-hydroxylase subunit alpha-1 OS=Homo sapiens GN=P4HA1 PE=1 SV=2 - [P4HA1_HUMAN]	59.74		10.49		2.62	1.69	4.49	7.3	1.5	2.06	5.24	10.11	9.55	2.62	14.04	3.75	1.87	6.74	8.61	5.99	8.99
Q9UK41	Vacuolar protein sorting-associated protein 28 homolog OS=Homo sapiens GN=VPS28 PE=1 SV=1 - [VPS28_HUMAN]	59.73			6.33			15.84				4.98	5.88		11.31	6.79	6.79	4.07			8.14	4.52
Q9HCN8	Stromal cell-derived factor 2-like protein 1 OS=Homo sapiens GN=SDF2L1 PE=1 SV=2 - [SDF2L_HUMAN]	59.73					8.14			9.05	9.05	14.93	5.88	10.86					9.95		15.84	8.14
O95816	BAG family molecular chaperone regulator 2 OS=Homo sapiens GN=BAG2 PE=1 SV=1 - [BAG2_HUMAN]	59.72	4.27	15.64	3.79	18.01		17.54	14.69		4.27	4.27			13.27	4.27	10.43	10.43		10.43	6.64	15.64
O95456	Proteasome assembly chaperone 1 OS=Homo sapiens GN=PSMG1 PE=1 SV=1 - [PSMG1_HUMAN]	59.72			4.86	5.56	11.81	3.47			6.94	2.43	3.82				13.89	5.21		8.68
Q8WUD1	Ras-related protein Rab-2B OS=Homo sapiens GN=RAB2B PE=1 SV=1 - [RAB2B_HUMAN]	59.72			3.24	6.48				16.2	23.61	12.96				5.09	5.09	13.43	5.09	11.57	6.02
Q9BWD1	Acetyl-CoA acetyltransferase, cytosolic OS=Homo sapiens GN=ACAT2 PE=1 SV=2 - [THIC_HUMAN]	59.7	1.51	4.53				18.14	15.62	4.03	7.81	7.81	5.04	14.86		2.02	3.78		7.05	2.77	6.05	4.53
Q9UKY7	Protein CDV3 homolog OS=Homo sapiens GN=CDV3 PE=1 SV=1 - [CDV3_HUMAN]	59.69	7.75		22.09	6.2	22.09	18.99		24.42	18.99	18.99		8.53	18.99	18.99	40.31	40.31	31.78	6.98
Q8NBY1	Serine/threonine-protein kinase MST4 OS=Homo sapiens GN=MST4 PE=2 SV=1 - [Q8NBY1_HUMAN]	59.69	6.89	4.08	10.46	3.06	3.06		4.34	4.34	5.36	5.36	2.55	13.52	9.95	6.12	2.81	11.99	7.65	5.1	2.55
Q9ULC4	Malignant T-cell-amplified sequence 1 OS=Homo sapiens GN=MCTS1 PE=1 SV=1 - [MCTS1_HUMAN]	59.67	23.76	9.39		8.29	8.29	6.63	17.13	10.5				9.94	4.97				11.05	9.39	17.13	9.39
Q9BWF3	RNA-binding protein 4 OS=Homo sapiens GN=RBM4 PE=1 SV=1 - [RBM4_HUMAN]	59.62	3.3	14.56	17.86	11.54	2.2				8.79			2.47	3.3	2.75	5.22	9.62	6.04			11.26
P08243-3	Isoform 3 of Asparagine synthetase [glutamine-hydrolyzing] OS=Homo sapiens GN=ASNS - [ASNS_HUMAN]	59.62		1.46	6.69	1.46	2.51	10.67	6.69	8.79	8.37	14.23	14.64	1.26	10.88	1.67	4.18	12.97	12.13	7.53	11.51	5.65
P63104	14-3-3 protein zeta/delta OS=Homo sapiens GN=YWHAZ PE=1 SV=1 - [1433Z_HUMAN]	59.59	12.65	11.84	7.35	6.94	19.18	28.16	20.41	24.49	15.1	34.29	19.59	24.08	15.1	8.16	16.33	13.88	25.31	16.73	16.73	12.24
I3L430	Heme oxygenase 2 OS=Homo sapiens GN=HMOX2 PE=2 SV=1 - [I3L430_HUMAN]	59.58	5.57	11.85		3.48	9.76	3.14	13.59	6.27		3.83	7.67	5.57	4.18	2.79	11.85			4.53	4.53	11.85
P41227	N-alpha-acetyltransferase 10 OS=Homo sapiens GN=NAA10 PE=1 SV=1 - [NAA10_HUMAN]	59.57	16.6							4.68	17.45	19.57	4.26	18.72	5.96	12.34				5.11	5.11
P13804	Electron transfer flavoprotein subunit alpha, mitochondrial OS=Homo sapiens GN=ETFA PE=1 SV=1 - [ETFA_HUMAN]	59.46		13.51	13.51	10.51		5.71	10.81	9.01	8.71	13.51			12.61	10.51	8.41	8.71	7.51	9.91	6.91	10.51
Q16539	Mitogen-activated protein kinase 14 OS=Homo sapiens GN=MAPK14 PE=1 SV=3 - [MK14_HUMAN]	59.44		15	8.33		3.06	3.06		3.06	3.06	6.94	13.89		6.67		4.17	3.61	2.22	2.22	5.83	5.56
Q8WW59	SPRY domain-containing protein 4 OS=Homo sapiens GN=SPRYD4 PE=1 SV=2 - [SPRY4_HUMAN]	59.42	4.83	5.31	5.31	4.35					3.86	9.66	4.83		10.14		9.66	13.04	4.83	13.04	7.25	5.31
P30405	Peptidyl-prolyl cis-trans isomerase F, mitochondrial OS=Homo sapiens GN=PPIF PE=1 SV=1 - [PPIF_HUMAN]	59.42		20.29				5.31	4.35	7.73	4.35			13.04		10.14	24.15	20.29	3.38
O15116	U6 snRNA-associated Sm-like protein LSm1 OS=Homo sapiens GN=LSM1 PE=1 SV=1 - [LSM1_HUMAN]	59.4				5.26								12.03		12.03				42.11
P31350	Ribonucleoside-diphosphate reductase subunit M2 OS=Homo sapiens GN=RRM2 PE=1 SV=1 - [RIR2_HUMAN]	59.38		8.23	4.11	3.34	3.34	7.46	2.57	3.6	5.66		3.34	7.71	3.34	6.94	5.14	3.34	16.71	7.2	6.17	8.23
H7C137	Ran-specific GTPase-activating protein (Fragment) OS=Homo sapiens GN=RANBP1 PE=2 SV=1 - [H7C137_HUMAN]	59.38			17.19	17.19	12.5	18.75		17.97			8.59				5.47	21.88	8.59	8.59	8.59	6.25
Q9NPE3	H/ACA ribonucleoprotein complex subunit 3 OS=Homo sapiens GN=NOP10 PE=1 SV=1 - [NOP10_HUMAN]	59.38					14.06	23.44	18.75	18.75	20.31	45.31
Q9BXS5	AP-1 complex subunit mu-1 OS=Homo sapiens GN=AP1M1 PE=1 SV=3 - [AP1M1_HUMAN]	59.34	6.15	10.4		8.04		5.44		4.49	4.49		2.36	17.97		5.2		4.96	15.84	5.67		7.8
E7EW69	Septin-10 OS=Homo sapiens GN=SEPT10 PE=2 SV=1 - [E7EW69_HUMAN]	59.33	10	8.67				3.56	1.78	4.44	4.67	6.22	19.33	2.44	6.89	6	11.11			1.78	4.44
E5RGW4	Nucleophosmin (Fragment) OS=Homo sapiens GN=NPM1 PE=2 SV=1 - [E5RGW4_HUMAN]	59.32		22.03					22.03	22.03	22.03	22.03					22.03	37.29	37.29	37.29	22.03	59.32
Q9UNM6	26S proteasome non-ATPase regulatory subunit 13 OS=Homo sapiens GN=PSMD13 PE=1 SV=2 - [PSD13_HUMAN]	59.31	9.84	10.9	4.79	6.91	9.31	3.19	2.13		1.86	1.86	6.38	5.05	5.59			4.52	3.19	6.91	8.24	5.85
Q99747	Gamma-soluble NSF attachment protein OS=Homo sapiens GN=NAPG PE=1 SV=1 - [SNAG_HUMAN]	59.29	4.49		3.21	4.17	10.9	2.88	5.45	18.59	13.14	4.49	4.49						2.56		16.03	5.77
F5H897	Heat shock protein 75 kDa, mitochondrial OS=Homo sapiens GN=TRAP1 PE=2 SV=1 - [F5H897_HUMAN]	59.29	3.99	3.69	2.15	7.53	6.3	8.29	8.6	17.51	5.99	12.29	12.75	7.68	14.44	9.37	7.53	6.76	14.75	11.21	11.67	4.92
O95182	NADH dehydrogenase [ubiquinone] 1 alpha subcomplex subunit 7 OS=Homo sapiens GN=NDUFA7 PE=1 SV=3 - [NDUA7_HUMAN]	59.29				7.96	8.85				11.5		20.35	15.93	11.5		12.39		9.73	16.81
P48637	Glutathione synthetase OS=Homo sapiens GN=GSS PE=1 SV=1 - [GSHB_HUMAN]	59.28	7.81	3.59		4.01	2.11	3.38	4.64	4.64		2.53	2.53	10.97	1.69	8.86	10.13	5.49	3.16	9.49	11.39
Q9UHX1-6	Isoform 6 of Poly(U)-binding-splicing factor PUF60 OS=Homo sapiens GN=PUF60 - [PUF60_HUMAN]	59.26	8.77	8.19	2.14	1.56	5.26	9.75	1.95	3.51	1.56	5.46	10.53	9.36	17.74	9.16	8.38	2.34	3.12	15.98	3.12	2.14
P62316-2	Isoform 2 of Small nuclear ribonucleoprotein Sm D2 OS=Homo sapiens GN=SNRPD2 - [SMD2_HUMAN]	59.26	15.74	26.85		7.41			9.26	9.26				25	25	25	34.26	16.67		17.59	17.59	26.85
G3V1N8	Vacuolar protein sorting 26 homolog A (Yeast), isoform CRA_a OS=Homo sapiens GN=VPS26A PE=2 SV=1 - [G3V1N8_HUMAN]	59.26	4.63	3.7		11.57		7.87	4.63		14.35	14.35	8.33	8.8		14.35	6.02	6.02				9.26
P24752	Acetyl-CoA acetyltransferase, mitochondrial OS=Homo sapiens GN=ACAT1 PE=1 SV=1 - [THIL_HUMAN]	59.25	7.73	2.11		5.39	9.84	7.96	8.9	1.64	3.98	3.98	6.79	13.11	7.26	12.65		1.87	7.03	9.13	8.9	4.45
Q99614	Tetratricopeptide repeat protein 1 OS=Homo sapiens GN=TTC1 PE=1 SV=1 - [TTC1_HUMAN]	59.25		4.11				3.42						4.11	10.62		3.42	10.96	22.6	8.9		8.56
Q9UBT2	SUMO-activating enzyme subunit 2 OS=Homo sapiens GN=UBA2 PE=1 SV=2 - [SAE2_HUMAN]	59.22	6.41	2.19	5.16	5.16	3.91	14.37	10.63	12.5	2.34	16.72	11.56	10.63	10.47	16.88	9.06	2.5	2.97	9.38	7.03	3.91
Q15813	Tubulin-specific chaperone E OS=Homo sapiens GN=TBCE PE=1 SV=1 - [TBCE_HUMAN]	59.2	1.9			4.93	4.55	11.57	2.28		4.36	8.16	8.16	3.42	1.33	5.88	6.45		4.36	8.54
P40121	Macrophage-capping protein OS=Homo sapiens GN=CAPG PE=1 SV=2 - [CAPG_HUMAN]	59.2	13.51	4.6	10.92	3.74	3.74	3.74	11.49	6.32	3.45	3.45	2.01	17.53	6.61	7.18		7.18	13.51	3.45	8.05	4.6
P22314	Ubiquitin-like modifier-activating enzyme 1 OS=Homo sapiens GN=UBA1 PE=1 SV=3 - [UBA1_HUMAN]	59.17	5.01	13.61	11.15	10.3	6.43	3.97	8.6	8.79	11.53	7.66	7.37	11.44	14.08	12.1	15.78	11.25	8.22	4.82	10.59	13.99
Q9P015	39S ribosomal protein L15, mitochondrial OS=Homo sapiens GN=MRPL15 PE=1 SV=1 - [RM15_HUMAN]	59.12	5.07			3.38	6.08	4.39	4.39	10.81	5.41	5.41	13.85	3.04	13.85		12.84
Q96A49	Synapse-associated protein 1 OS=Homo sapiens GN=SYAP1 PE=1 SV=1 - [SYAP1_HUMAN]	59.09	9.09	9.38	13.92	9.66	7.67	7.67	3.69		2.27	16.48	3.98	9.94	6.82	9.94		12.5	14.2	13.35	18.18	18.18
P09923	Intestinal-type alkaline phosphatase OS=Homo sapiens GN=ALPI PE=1 SV=2 - [PPBI_HUMAN]	59.09	9.09	6.82	7.2	6.82	6.63	10.61	12.31	18.37	4.92	12.31	19.32	9.47	20.27	11.36	17.8	13.26	14.77	9.85	3.03	4.73
F8VY35	Nucleosome assembly protein 1-like 1 (Fragment) OS=Homo sapiens GN=NAP1L1 PE=2 SV=1 - [F8VY35_HUMAN]	59.09	10.98				6.82	10.61	3.79		18.56	4.55	4.55	4.55		21.59	26.89	30.68	18.56	17.05	23.86
Q9Y6B6	GTP-binding protein SAR1b OS=Homo sapiens GN=SAR1B PE=1 SV=1 - [SAR1B_HUMAN]	59.09		4.04	8.08			11.62	11.62		5.56		14.14		24.24	6.06		5.56	11.11	15.15	5.56	4.04
Q8IY31	Intraflagellar transport protein 20 homolog OS=Homo sapiens GN=IFT20 PE=1 SV=1 - [IFT20_HUMAN]	59.09							21.21			11.36		12.12						7.58	17.42
P55084	Trifunctional enzyme subunit beta, mitochondrial OS=Homo sapiens GN=HADHB PE=1 SV=3 - [ECHB_HUMAN]	59.07	9.07		7.81	3.38	1.69	3.38	15.4	7.81	5.49	1.69	4.64	6.33	8.02	5.06	5.06		9.07	16.67	7.81
I3L439	Tubulin-specific chaperone D (Fragment) OS=Homo sapiens GN=TBCD PE=2 SV=1 - [I3L439_HUMAN]	58.98	7.81	8.59	3.52			6.64			18.75	6.25		7.81			6.64	3.52			3.52	8.59
Q15046	Lysine--tRNA ligase OS=Homo sapiens GN=KARS PE=1 SV=3 - [SYK_HUMAN]	58.96	8.88	8.54	5.36	5.86	4.52		4.36	1.17	9.05	11.22	12.23	11.89	3.02	10.05	2.01	10.05	10.22	15.58	10.55	4.86
D6R9X5	Ras GTPase-activating protein-binding protein 2 (Fragment) OS=Homo sapiens GN=G3BP2 PE=2 SV=1 - [D6R9X5_HUMAN]	58.93					21.43		21.43	57.14			23.21
Q9BW83-2	Isoform 2 of Intraflagellar transport protein 27 homolog OS=Homo sapiens GN=IFT27 - [IFT27_HUMAN]	58.92						8.65				7.57	13.51				20		4.32	4.86	4.86
F8W7C6	60S ribosomal protein L10 OS=Homo sapiens GN=RPL10 PE=2 SV=1 - [F8W7C6_HUMAN]	58.9	11.04		7.98	6.75	6.75	19.63	28.22	19.63	19.63	26.99	21.47	8.59	20.86	28.83	16.56	33.74	8.59	15.34	12.88	19.63
P22087	rRNA 2'-O-methyltransferase fibrillarin OS=Homo sapiens GN=FBL PE=1 SV=2 - [FBRL_HUMAN]	58.88	4.36	16.51	16.2	6.54			3.43	14.33	21.18	7.17	10.28	14.64	10.28	10.28	9.97	15.89	24.61	15.26	11.84	12.15
B4E241	Serine/arginine-rich-splicing factor 3 OS=Homo sapiens GN=SFRS3 PE=2 SV=1 - [B4E241_HUMAN]	58.87	17.74				6.45	6.45	13.71	16.94	9.68		25	11.29	33.87	8.06	27.42	11.29		16.94
P61960	Ubiquitin-fold modifier 1 OS=Homo sapiens GN=UFM1 PE=1 SV=1 - [UFM1_HUMAN]	58.82									8.24					58.82
P23284	Peptidyl-prolyl cis-trans isomerase B OS=Homo sapiens GN=PPIB PE=1 SV=2 - [PPIB_HUMAN]	58.8	11.57	4.17	12.96	12.96	18.06	17.13	15.28	32.41	29.63	18.06	25.93	13.89	20.83	13.89	11.11	15.74	11.11	31.02	22.69	15.74
H0Y5R6	Uroporphyrinogen decarboxylase (Fragment) OS=Homo sapiens GN=UROD PE=4 SV=1 - [H0Y5R6_HUMAN]	58.77	2.63			9.65		6.14			19.74		3.95	4.39	2.63	4.39	7.02	6.14			3.07
Q1ED39	Protein C16orf88 OS=Homo sapiens GN=C16orf88 PE=1 SV=1 - [CP088_HUMAN]	58.73	9.39	2.84		6.99		5.24	3.06	6.99	12.88	3.06	4.37	10.7	10.26	13.54	11.79	11.35	9.61		2.62	2.62
O95881	Thioredoxin domain-containing protein 12 OS=Homo sapiens GN=TXNDC12 PE=1 SV=1 - [TXD12_HUMAN]	58.72		5.23								30.81	30.81			8.72	22.67	13.95	5.23			5.23
H7BZT7	S-formylglutathione hydrolase (Fragment) OS=Homo sapiens GN=ESD PE=4 SV=1 - [H7BZT7_HUMAN]	58.7	10					14.78	17.83	17.83	5.22	5.65	5.65		12.17	10	9.57				3.91
Q9BUP3	Oxidoreductase HTATIP2 OS=Homo sapiens GN=HTATIP2 PE=1 SV=2 - [HTAI2_HUMAN]	58.68	3.31	9.09	9.09		4.13	19.01	5.37	3.72	6.61	7.85	11.57	3.31	7.44	4.13		5.37	5.37			4.55
Q01813	6-phosphofructokinase type C OS=Homo sapiens GN=PFKP PE=1 SV=2 - [K6PP_HUMAN]	58.67	1.02	10.46	7.27	8.29	17.35	18.62	9.44	15.18	14.16	15.94	3.06	1.02	3.44	1.28	2.17		4.08	9.06	5.74	6.51
Q13637	Ras-related protein Rab-32 OS=Homo sapiens GN=RAB32 PE=1 SV=3 - [RAB32_HUMAN]	58.67		3.11		10.67	11.56	13.33	9.33	9.33	4		4.89		4.89			4.44			5.78	5.78
P62241	40S ribosomal protein S8 OS=Homo sapiens GN=RPS8 PE=1 SV=2 - [RS8_HUMAN]	58.65	11.54	12.02	7.21	7.21	7.21	20.19	13.94	10.58	10.58	7.21	7.21	5.29	18.75		11.06	27.4	21.63	23.56	13.46	12.02
E9PN89	Heat shock cognate 71 kDa protein (Fragment) OS=Homo sapiens GN=HSPA8 PE=2 SV=1 - [E9PN89_HUMAN]	58.65	7.05	31.41	21.15	19.55	22.12	14.1	15.71	18.27	19.23	17.63	9.29	8.33	16.35	8.33	9.62	8.01	8.33	21.79	25.96	32.05
Q92890	Ubiquitin fusion degradation protein 1 homolog OS=Homo sapiens GN=UFD1L PE=1 SV=3 - [UFD1_HUMAN]	58.63	7.82	10.1	10.75	11.07	4.23		3.91	2.61	4.23			7.82			6.19		6.51	4.89	7.49
E7EVY3	Calpastatin OS=Homo sapiens GN=CAST PE=2 SV=1 - [E7EVY3_HUMAN]	58.59	12.55	7.07	11.83	11.54	8.8	10.97	7.36	6.49	3.17		8.08	3.46	5.92	3.03	7.22	11.11	3.75	2.16	9.38	7.65
P14927	Cytochrome b-c1 complex subunit 7 OS=Homo sapiens GN=UQCRB PE=1 SV=2 - [QCR7_HUMAN]	58.56	13.51					9.01	16.22					13.51	8.11	6.31	18.02			11.71	20.72
H7BZJ3	Thioredoxin (Fragment) OS=Homo sapiens GN=PDIA3 PE=2 SV=1 - [H7BZJ3_HUMAN]	58.54		11.38		8.94		17.07	17.07	17.07	17.07	30.08	9.76		11.38	9.76	9.76	8.94	7.32	18.7	11.38	11.38
P20700	Lamin-B1 OS=Homo sapiens GN=LMNB1 PE=1 SV=2 - [LMNB1_HUMAN]	58.53	17.92	5.12	7	1.88	4.44	6.66	4.95		2.9	5.29	6.66	12.12	9.56	7.34	7.51	16.04	15.02	8.19	6.66	4.61
P08243-2	Isoform 2 of Asparagine synthetase [glutamine-hydrolyzing] OS=Homo sapiens GN=ASNS - [ASNS_HUMAN]	58.52		1.3	5.93	1.3	5.19	9.44	5.93	10.19	10	12.59	12.96	1.11	9.63	1.48	3.7	12.04	13.33	9.26	12.78	5
F5GWE5	Phosphatidylinositol transfer protein alpha isoform OS=Homo sapiens GN=PITPNA PE=2 SV=1 - [F5GWE5_HUMAN]	58.52		5.19	4.07		6.3	6.3		10.74	2.22		13.7	15.19		8.52		9.63	7.41
H0YDN1	Plectin (Fragment) OS=Homo sapiens GN=PLEC PE=4 SV=1 - [H0YDN1_HUMAN]	58.5	20	15	6	5	6.5	6.5	5.5	12	21	6.5	15		19.5		6.5	6.5	5.5	9		9.5
C9JFR7	Cytochrome c (Fragment) OS=Homo sapiens GN=CYCS PE=2 SV=1 - [C9JFR7_HUMAN]	58.42		23.76	31.68	7.92	13.86	31.68	17.82			8.91							10.89
P62191	26S protease regulatory subunit 4 OS=Homo sapiens GN=PSMC1 PE=1 SV=1 - [PRS4_HUMAN]	58.41	6.14	2.95		2.73	5	2.27		4.77	4.77	10.45	15	7.05	17.95	7.5	8.64	10.68	7.27	8.41	10.68	7.5
P63172	Dynein light chain Tctex-type 1 OS=Homo sapiens GN=DYNLT1 PE=1 SV=1 - [DYLT1_HUMAN]	58.41	14.16		15.93	15.93	19.47							23.01
H0Y3Z3	Protein disulfide-isomerase (Fragment) OS=Homo sapiens GN=P4HB PE=3 SV=1 - [H0Y3Z3_HUMAN]	58.39	17.15	14.6	10.22	13.14	9.12		7.3	16.06	9.12	11.68	8.76	17.52	6.2	14.6	14.6	17.15	24.45	17.52	28.47	18.25
H0YM46	Isocitrate dehydrogenase [NAD] subunit alpha, mitochondrial (Fragment) OS=Homo sapiens GN=IDH3A PE=3 SV=1 - [H0YM46_HUMAN]	58.33		20.83							16.67						20.83					20.83
Q9UBB4	Ataxin-10 OS=Homo sapiens GN=ATXN10 PE=1 SV=1 - [ATX10_HUMAN]	58.32	8.63	5.05			11.79	7.79	2.11		3.58	8	2.74	14.95	8.63	9.05	7.16	16	13.05	10.32	7.58	5.05
P35241	Radixin OS=Homo sapiens GN=RDX PE=1 SV=1 - [RADI_HUMAN]	58.32	6.52	5.66	1.37	7.03	15.09	5.49	3.6	9.61	9.78	15.44	9.43	13.04	11.15	9.09	8.92	6.69	7.38	13.38	9.26	4.12
G5E9W7	28S ribosomal protein S22, mitochondrial OS=Homo sapiens GN=MRPS22 PE=2 SV=1 - [G5E9W7_HUMAN]	58.31	8.46		2.19	6.58	6.58		2.82	10.97	15.67		5.33	2.51	3.45	4.39		11.29	11.29	3.13	6.58	6.27
K7ENG2	Splicing factor U2AF 65 kDa subunit OS=Homo sapiens GN=U2AF2 PE=4 SV=1 - [K7ENG2_HUMAN]	58.31	5.86	7.17	7.17				10.75	19.22	19.54	3.26	6.84	11.07	6.84	5.86	8.47	5.54	7.17
Q99536	Synaptic vesicle membrane protein VAT-1 homolog OS=Homo sapiens GN=VAT1 PE=1 SV=2 - [VAT1_HUMAN]	58.27	22.14			9.67	4.07		2.8	12.47	7.63	8.4	9.41	3.82	18.07					9.16	6.87	13.49
P41091	Eukaryotic translation initiation factor 2 subunit 3 OS=Homo sapiens GN=EIF2S3 PE=1 SV=3 - [IF2G_HUMAN]	58.26	8.9	7.42	2.33		5.72	10.59	6.78	11.23	16.95	9.11	3.18	13.77	10.81	13.77	5.3	5.3	11.44	23.73	8.26	4.03
P30040	Endoplasmic reticulum resident protein 29 OS=Homo sapiens GN=ERP29 PE=1 SV=4 - [ERP29_HUMAN]	58.24	15.33	5.75		3.83	4.6	16.86	8.43	8.43	9.58		5.75		21.07		13.41	19.54	9.58	11.49	5.75	5.75
P07919	Cytochrome b-c1 complex subunit 6, mitochondrial OS=Homo sapiens GN=UQCRH PE=1 SV=2 - [QCR6_HUMAN]	58.24		28.57	19.78	19.78	19.78							9.89		9.89	9.89					28.57
Q9NYL9	Tropomodulin-3 OS=Homo sapiens GN=TMOD3 PE=1 SV=1 - [TMOD3_HUMAN]	58.24				11.08	18.18	11.08	5.68	6.25	2.27	2.27	4.83	2.56		5.97	5.4	5.4	5.4	10.51		7.95
P30153	Serine/threonine-protein phosphatase 2A 65 kDa regulatory subunit A alpha isoform OS=Homo sapiens GN=PPP2R1A PE=1 SV=4 - [2AAA_HUMAN]	58.23	6.45	7.64	1.36	2.72	6.45	8.32	4.92	5.09	4.41	4.41	9.85	11.38	8.66	11.71	2.04	20.03	14.26	1.7	7.47	10.87
Q9NRP2	COX assembly mitochondrial protein 2 homolog OS=Homo sapiens GN=CMC2 PE=1 SV=1 - [COXM2_HUMAN]	58.23		12.66								27.85	40.51		26.58		16.46			12.66
B1AHD3	Pyridoxal phosphate phosphatase OS=Homo sapiens GN=PDXP PE=2 SV=1 - [B1AHD3_HUMAN]	58.23		17.72					18.99		21.52			8.86						12.66	12.66
Q8N5N7	39S ribosomal protein L50, mitochondrial OS=Homo sapiens GN=MRPL50 PE=1 SV=2 - [RM50_HUMAN]	58.23					6.96	9.49	9.49			8.23					10.13	22.78	10.13		18.99	6.96
Q9BT73	Proteasome assembly chaperone 3 OS=Homo sapiens GN=PSMG3 PE=1 SV=1 - [PSMG3_HUMAN]	58.2	12.3						10.66		19.67	19.67			12.3		7.38			8.2	8.2
P60891	Ribose-phosphate pyrophosphokinase 1 OS=Homo sapiens GN=PRPS1 PE=1 SV=2 - [PRPS1_HUMAN]	58.18	10.38	16.67	13.52	11.32	6.6	4.09	4.09	9.12	5.35	8.49	3.14	17.61	20.75	15.72				11.64	6.92	5.66
P00167-2	Isoform 2 of Cytochrome b5 OS=Homo sapiens GN=CYB5A - [CYB5_HUMAN]	58.16	48.98											14.29	13.27			9.18
Q14558	Phosphoribosyl pyrophosphate synthase-associated protein 1 OS=Homo sapiens GN=PRPSAP1 PE=1 SV=2 - [KPRA_HUMAN]	58.15	12.36			9.83	9.83	3.93				3.37		20.51	12.92	15.45				4.21	6.18
Q96SZ5	2-aminoethanethiol dioxygenase OS=Homo sapiens GN=ADO PE=1 SV=2 - [AEDO_HUMAN]	58.15	2.59	3.33	6.67	6.67	6.67	3.33			8.89				11.85		4.07				16.67	5.93
Q9UMX5	Neudesin OS=Homo sapiens GN=NENF PE=1 SV=1 - [NENF_HUMAN]	58.14				5.81				8.72	8.72	10.47	16.28	5.23	20.93	27.33	6.4					10.47
Q13895	Bystin OS=Homo sapiens GN=BYSL PE=1 SV=3 - [BYST_HUMAN]	58.12	8.01	6.64	15.1	6.86		3.43	1.83	2.06	8.01	2.06	5.26	7.78	6.18	4.12	4.12	2.06				7.32
J3KT98	Phosphoribosylformylglycinamidine synthase (Fragment) OS=Homo sapiens GN=PFAS PE=4 SV=1 - [J3KT98_HUMAN]	58.12	17.09									23.93			5.98				5.98		5.13
Q12972	Nuclear inhibitor of protein phosphatase 1 OS=Homo sapiens GN=PPP1R8 PE=1 SV=2 - [PP1R8_HUMAN]	58.12		6.27	6.27				6.84	11.11	19.66	11.4	7.12	9.4		3.13	6.27	9.12	11.97	4.56	3.42	3.42
Q8NFQ8	Torsin-1A-interacting protein 2 OS=Homo sapiens GN=TOR1AIP2 PE=1 SV=1 - [TOIP2_HUMAN]	58.09	14.68	3.19	3.19	3.4	2.98	3.19		2.77	7.66	2.34	4.47	2.34	6.6	5.32	8.94	11.28				2.13
P46060	Ran GTPase-activating protein 1 OS=Homo sapiens GN=RANGAP1 PE=1 SV=1 - [RAGP1_HUMAN]	58.09	8.35	2.04	4.77	7.67	12.27	4.26	4.6	8.18	13.63	17.72	5.79	7.84	4.26	5.96	6.81	3.41		3.07	6.98	1.87
Q13188	Serine/threonine-protein kinase 3 OS=Homo sapiens GN=STK3 PE=1 SV=2 - [STK3_HUMAN]	58.04		4.48	1.63		5.5	16.29	7.74	2.65		5.3		6.31			6.31	5.5	2.65	2.04		1.63
O60832	H/ACA ribonucleoprotein complex subunit 4 OS=Homo sapiens GN=DKC1 PE=1 SV=3 - [DKC1_HUMAN]	57.98	6.42	5.64	4.86	3.11	4.47	12.65	5.25	1.95	6.42	2.53		2.33	1.36	6.81	14.59	10.12	4.67	6.81	11.09	1.95
Q00796	Sorbitol dehydrogenase OS=Homo sapiens GN=SORD PE=1 SV=4 - [DHSO_HUMAN]	57.98	8.4	4.48	16.53	7	10.08	10.08	5.6	5.6	4.76	4.76	1.96	5.88	12.32		5.04	9.24	7.56	4.2	4.2	4.48
Q9UBP6	tRNA (guanine-N(7)-)-methyltransferase OS=Homo sapiens GN=METTL1 PE=1 SV=1 - [TRMB_HUMAN]	57.97					6.52		11.23	5.43	9.06	5.07				8.33		2.9	17.39	14.13
Q5SZC5	Guanine deaminase (Fragment) OS=Homo sapiens GN=GDA PE=2 SV=1 - [Q5SZC5_HUMAN]	57.95						17.44	4.1	4.1		9.74	26.67		26.67			6.15	16.41	7.69
O76003	Glutaredoxin-3 OS=Homo sapiens GN=GLRX3 PE=1 SV=2 - [GLRX3_HUMAN]	57.91	4.78	15.22					2.39	5.67	7.46	7.46	3.28	4.78		2.99	16.72	12.54	10.15	11.04	4.18	14.93
Q6IBS0	Twinfilin-2 OS=Homo sapiens GN=TWF2 PE=1 SV=2 - [TWF2_HUMAN]	57.88	2.01		5.16		4.58	2.29	9.74		6.3	6.3	8.6	4.3	4.87	2.29		6.59	5.44	10.32	10.32	4.87
P30042	ES1 protein homolog, mitochondrial OS=Homo sapiens GN=C21orf33 PE=1 SV=3 - [ES1_HUMAN]	57.84	13.06		9.33	9.33			3.73	2.99	4.1		2.99	14.93		5.6	13.43		8.21	8.21	9.7
C9J1E1	Biliverdin reductase A (Fragment) OS=Homo sapiens GN=BLVRA PE=2 SV=1 - [C9J1E1_HUMAN]	57.84										38.24	38.24						9.8	9.8	9.8
Q15126	Phosphomevalonate kinase OS=Homo sapiens GN=PMVK PE=1 SV=3 - [PMVK_HUMAN]	57.81	8.85						6.77	10.94	8.33	5.21	5.73	13.54	5.73	19.79	6.77	6.77				5.21
Q96E11-3	Isoform 3 of Ribosome-recycling factor, mitochondrial OS=Homo sapiens GN=MRRF - [RRFM_HUMAN]	57.8		7.34		3.67					6.88	5.5		5.05		10.09	10.09	9.63			9.63	16.97
P28331	NADH-ubiquinone oxidoreductase 75 kDa subunit, mitochondrial OS=Homo sapiens GN=NDUFS1 PE=1 SV=3 - [NDUS1_HUMAN]	57.77		3.71	2.75	7.84	6.6	5.64	5.36	11.83	6.33	3.85	1.1			2.2	7.43	7.84	6.6	2.34	1.1	5.09
Q14376	UDP-glucose 4-epimerase OS=Homo sapiens GN=GALE PE=1 SV=2 - [GALE_HUMAN]	57.76		6.9	8.91	4.02	13.79	2.87			2.87	2.87	2.01	5.75		2.87	8.05	10.34		10.63	8.33	12.93
B4DVY1	Eukaryotic translation initiation factor 3 subunit D OS=Homo sapiens GN=EIF3D PE=2 SV=1 - [B4DVY1_HUMAN]	57.72	4.21	6.61	2	3.61	3.81	18.04	13.23	7.21	13.03	5.81		1.6	7.41	5.01		1.8	2.4	5.41	2.4	4.81
P20340	Ras-related protein Rab-6A OS=Homo sapiens GN=RAB6A PE=1 SV=3 - [RAB6A_HUMAN]	57.69	15.87	9.62	4.33		12.02	17.31					12.5	9.13	5.29	14.42	5.77				5.29	5.29
P06737-2	Isoform 2 of Glycogen phosphorylase, liver form OS=Homo sapiens GN=PYGL - [PYGL_HUMAN]	57.69	10.7	10.09	4.18	5.29	2.71	5.78	3.08	4.31	1.48	5.9	5.29	13.04	6.77	10.21	5.17	6.64	3.2	6.89	4.18	4.92
E7EM64	COP9 signalosome complex subunit 6 OS=Homo sapiens GN=COPS6 PE=2 SV=1 - [E7EM64_HUMAN]	57.67		7.06	4.6		3.99	3.99	6.44	9.82	3.37	8.28		3.37		7.06	7.06	4.91	5.52	15.34	12.27
Q9Y3E2	BolA-like protein 1 OS=Homo sapiens GN=BOLA1 PE=1 SV=1 - [BOLA1_HUMAN]	57.66		15.33	15.33					12.41	12.41	10.95	10.95			12.41						16.06
Q8IXM3	39S ribosomal protein L41, mitochondrial OS=Homo sapiens GN=MRPL41 PE=1 SV=1 - [RM41_HUMAN]	57.66		7.3		15.33	5.11	10.95	10.95			24.09										7.3
P58546	Myotrophin OS=Homo sapiens GN=MTPN PE=1 SV=2 - [MTPN_HUMAN]	57.63	23.73	8.47	8.47				11.02	34.75	22.03			30.51		14.41
P30046	D-dopachrome decarboxylase OS=Homo sapiens GN=DDT PE=1 SV=3 - [DOPD_HUMAN]	57.63		20.34	29.66	21.19	11.02	11.02	11.02	11.86		16.95		22.88	6.78	12.71	12.71	22.88	10.17	10.17	10.17	16.95
O95292	Vesicle-associated membrane protein-associated protein B/C OS=Homo sapiens GN=VAPB PE=1 SV=3 - [VAPB_HUMAN]	57.61	4.53	5.76	15.64	22.63	11.93	7					8.23		3.29	3.7		12.35	5.76	10.7	13.58
P53621	Coatomer subunit alpha OS=Homo sapiens GN=COPA PE=1 SV=2 - [COPA_HUMAN]	57.6	4.49	4.66	2.04	6.29	7.68	12.99	8.42	8.58	9.48	0.74	4.08	8.66	5.8	5.72	6.29	3.84	6.05	5.64	5.56	3.27
P42330	Aldo-keto reductase family 1 member C3 OS=Homo sapiens GN=AKR1C3 PE=1 SV=4 - [AK1C3_HUMAN]	57.59	6.19					5.88	12.07	12.07			17.96	6.81	16.41	15.79	4.95	4.95	2.48	12.69
Q96BR5	Sel1 repeat-containing protein 1 OS=Homo sapiens GN=SELRC1 PE=1 SV=2 - [SELR1_HUMAN]	57.58		19.48	15.58		5.19	3.46	3.46	4.33	6.49	3.9		6.06		6.06		3.03			10.39	25.11
P06493	Cyclin-dependent kinase 1 OS=Homo sapiens GN=CDK1 PE=1 SV=3 - [CDK1_HUMAN]	57.58		9.09		5.05	11.78	4.04	6.73	5.72	9.09	5.39			3.7	11.11	8.42	4.71		4.04		9.09
Q7Z7K0	COX assembly mitochondrial protein homolog OS=Homo sapiens GN=CMC1 PE=1 SV=1 - [COXM1_HUMAN]	57.55		18.87	9.43	9.43		20.75		9.43					16.04					8.49
Q9UHD8	Septin-9 OS=Homo sapiens GN=SEPT9 PE=1 SV=2 - [SEPT9_HUMAN]	57.51	13.31	5.12	2.73	3.92	3.92	8.87	5.46	11.09	2.05	4.95	1.37	4.78	6.31	10.92	6.66	8.19	1.88	3.58	5.29	1.19
P61026	Ras-related protein Rab-10 OS=Homo sapiens GN=RAB10 PE=1 SV=1 - [RAB10_HUMAN]	57.5	14.5	9.5	11.5			12			5.5	12	9	15	16.5	11	5.5	5.5	13	5.5	15	5.5
Q9NWU5-2	Isoform 2 of 39S ribosomal protein L22, mitochondrial OS=Homo sapiens GN=MRPL22 - [RM22_HUMAN]	57.5	10	6.67		13.33				14.17				15.83						10.83	10.83
Q9GZN8	UPF0687 protein C20orf27 OS=Homo sapiens GN=C20orf27 PE=1 SV=3 - [CT027_HUMAN]	57.47		12.07						20.11			16.67			17.82	10.92	10.92
Q9NQT4	Exosome complex component RRP46 OS=Homo sapiens GN=EXOSC5 PE=1 SV=1 - [EXOS5_HUMAN]	57.45	14.04			5.11		2.98		9.79	15.32			14.47					5.96	5.96
Q9NUQ9	Protein FAM49B OS=Homo sapiens GN=FAM49B PE=1 SV=1 - [FA49B_HUMAN]	57.41	4.32	15.74	5.86						4.63	4.63		2.16	4.01		21.6		4.01	6.17	3.4	11.73
P40937-2	Isoform 2 of Replication factor C subunit 5 OS=Homo sapiens GN=RFC5 - [RFC5_HUMAN]	57.37		8.46	10.66		2.19	6.9								12.54	22.88	6.9	5.64	4.7	10.97	8.46
P61353	60S ribosomal protein L27 OS=Homo sapiens GN=RPL27 PE=1 SV=2 - [RL27_HUMAN]	57.35	6.62	21.32	5.88	5.88		8.09	15.44	8.09	5.88			5.88	21.32			14.71	13.24	6.62	27.94	21.32
Q9BUH6	Uncharacterized protein C9orf142 OS=Homo sapiens GN=C9orf142 PE=1 SV=2 - [CI142_HUMAN]	57.35		6.37		4.41	10.29				3.92	20.1	5.88	20.1					13.73	7.35
H7C2E4	CAD protein (Fragment) OS=Homo sapiens GN=CAD PE=3 SV=1 - [H7C2E4_HUMAN]	57.34		4.44			10.92	11.6	13.31		9.22	9.22	3.07		3.07	10.24	10.58	4.1		11.95	8.53
P27797	Calreticulin OS=Homo sapiens GN=CALR PE=1 SV=1 - [CALR_HUMAN]	57.31	7.91	21.58	20.14	21.1	11.03	13.19	13.67	11.51			8.63	10.55	16.31	5.76	5.76	14.15	9.35	20.86	22.78	11.99
P33993	DNA replication licensing factor MCM7 OS=Homo sapiens GN=MCM7 PE=1 SV=4 - [MCM7_HUMAN]	57.3	4.31	3.76	4.17	3.06	4.03	6.4	6.26	6.26	9.6	11.96	6.82	6.82	2.92	8.9	4.17	4.31	4.31	5.84	7.23	1.81
P80723	Brain acid soluble protein 1 OS=Homo sapiens GN=BASP1 PE=1 SV=2 - [BASP1_HUMAN]	57.27	30.4	22.03	25.11		12.33	18.5	9.25	9.25	6.17			33.48	28.19	33.48	25.99	25.99	32.16	32.16	25.99	12.78
E9PLB2	Importin-7 (Fragment) OS=Homo sapiens GN=IPO7 PE=2 SV=1 - [E9PLB2_HUMAN]	57.25				11.45	18.32				25.95	11.45	11.45			9.16		6.11				12.98
P07900	Heat shock protein HSP 90-alpha OS=Homo sapiens GN=HSP90AA1 PE=1 SV=5 - [HS90A_HUMAN]	57.24	7.38	26.37	25	29.92	18.03	18.17	18.58	15.85	15.3	10.11	15.03	16.53	16.26	21.99	16.94	19.95	24.32	21.04	17.76	21.99
P41250	Glycine--tRNA ligase OS=Homo sapiens GN=GARS PE=1 SV=3 - [SYG_HUMAN]	57.24	8.8	13.13	11.1	6.63	0.95	5.55	8.25	6.36	9.88	8.8	5.95	9.34	5.82	10.42	12.18	12.58	2.3	9.2	5.55	11.23
P35579	Myosin-9 OS=Homo sapiens GN=MYH9 PE=1 SV=4 - [MYH9_HUMAN]	57.19	7.04	8.98	9.39	9.49	7.3	6.68	7.81	5.05	7.55	7.5	8.47	7.65	5.92	8.78	9.23	9.44	14.69	12.35	10.77	9.54
P07195	L-lactate dehydrogenase B chain OS=Homo sapiens GN=LDHB PE=1 SV=2 - [LDHB_HUMAN]	57.19	22.46	17.96	23.35	26.05	22.46	22.46	22.16	5.69	44.31	31.74	29.94	16.47	39.82	19.76	22.16	13.77	20.36	23.65	26.65	19.46
Q13619	Cullin-4A OS=Homo sapiens GN=CUL4A PE=1 SV=3 - [CUL4A_HUMAN]	57.18	4.87	6.46	5.27	4.61	4.22	3.29	1.32	2.5	10.8	8.43	8.96	1.05	13.44	4.61	1.05	5.27	7.25	11.59	4.61	4.74
P22234	Multifunctional protein ADE2 OS=Homo sapiens GN=PAICS PE=1 SV=3 - [PUR6_HUMAN]	57.18	1.65	3.06	1.88	1.88	4.94	20.71	15.29	24.24	19.76	14.12	11.76		3.53	4.94	6.82	11.29	7.76	19.76	11.06
O14579	Coatomer subunit epsilon OS=Homo sapiens GN=COPE PE=1 SV=3 - [COPE_HUMAN]	57.14		15.26			6.49	6.82	6.82	3.25	4.55		6.49		6.49	7.14	10.71	3.57	5.52	10.06	7.47
C9J6L2	Serine/threonine-protein kinase 25 (Fragment) OS=Homo sapiens GN=STK25 PE=2 SV=1 - [C9J6L2_HUMAN]	57.14		9.94	9.94			9.32	10.56	10.56	4.35	9.94	5.59	8.07		8.07		9.32	9.32	9.94
H0YDF9	Protein scribble homolog (Fragment) OS=Homo sapiens GN=SCRIB PE=2 SV=1 - [H0YDF9_HUMAN]	57.14			5	15.71										27.14						9.29
Q93009	Ubiquitin carboxyl-terminal hydrolase 7 OS=Homo sapiens GN=USP7 PE=1 SV=2 - [UBP7_HUMAN]	57.08	2.63	2.54	10.89	1	4.81	7.89	10.53	5.44	1.54	4.81	3.18	4.63	5.08	8.71	6.9	3.9		4.81	5.26	2.27
Q13177	Serine/threonine-protein kinase PAK 2 OS=Homo sapiens GN=PAK2 PE=1 SV=3 - [PAK2_HUMAN]	57.06	3.82	10.11	8.02	2.48	5.53	6.87	8.02	10.11	13.17	2.29	2.29	5.34	2.29	3.05	1.72	1.72	6.49	4.96	3.05	8.4
P32322	Pyrroline-5-carboxylate reductase 1, mitochondrial OS=Homo sapiens GN=PYCR1 PE=1 SV=2 - [P5CR1_HUMAN]	57.05	3.76	8.78	5.02	10.34	10.66		7.84	9.4	15.05	15.05	10.34		12.54	4.08	18.18	19.44	8.78	11.29	15.05
E9PLK3	Puromycin-sensitive aminopeptidase OS=Homo sapiens GN=NPEPPS PE=2 SV=1 - [E9PLK3_HUMAN]	57.05	9.18	2.62	1.2	6.12	3.61	4.92	2.3	4.59	7.21	3.93	2.95	13.33	5.14	9.07	9.29	4.15	6.23	9.29	6.78	2.84
P08708	40S ribosomal protein S17 OS=Homo sapiens GN=RPS17 PE=1 SV=2 - [RS17_HUMAN]	57.04	25.19	16.3	15.56	8.15	8.15	16.3	16.3	16.3	9.63	8.89	8.89	26.67	25.19	24.44	17.04		7.41	7.41	16.3
C9JAX1	Frataxin, mitochondrial OS=Homo sapiens GN=FXN PE=2 SV=1 - [C9JAX1_HUMAN]	57.04							29.63	18.52			15.56							8.89	9.63
J3QQQ9	KRAB-A domain-containing protein 2 OS=Homo sapiens GN=KRBA2 PE=4 SV=1 - [J3QQQ9_HUMAN]	57.01	16.82	16.82	23.36	8.41			16.82	21.5	21.5	14.95		8.41	15.89			8.41	8.41	9.35	9.35	8.41
Q9BXV9	Uncharacterized protein C14orf142 OS=Homo sapiens GN=C14orf142 PE=2 SV=2 - [CN142_HUMAN]	57								23						18	18	16	16
Q14258	E3 ubiquitin/ISG15 ligase TRIM25 OS=Homo sapiens GN=TRIM25 PE=1 SV=2 - [TRI25_HUMAN]	56.98	4.44	1.59		4.29	13.97	5.71	6.98	3.33	3.65	3.65	5.71	8.41	8.73	6.98	8.89	1.9		6.98	7.3	1.59
P09960	Leukotriene A-4 hydrolase OS=Homo sapiens GN=LTA4H PE=1 SV=2 - [LKHA4_HUMAN]	56.96	12.6	6.38	2.13		2.95	13.09	5.24	9.49	5.73	7.53	2.78	16.04	10.47	4.26	4.09	5.07	4.58	7.2		1.64
O95573	Long-chain-fatty-acid--CoA ligase 3 OS=Homo sapiens GN=ACSL3 PE=1 SV=3 - [ACSL3_HUMAN]	56.94	2.64	10.14	11.94	2.92	2.92	4.44	6.39	7.36	1.53	3.06	5.69	7.64	8.33	2.5	1.25	1.25	1.39	4.58	12.64	8.19
Q6YN16	Hydroxysteroid dehydrogenase-like protein 2 OS=Homo sapiens GN=HSDL2 PE=1 SV=1 - [HSDL2_HUMAN]	56.94	1.91		5.5	6.46	4.31	3.35	8.61	13.64	9.33			1.91		5.02	3.11		2.63	9.09	2.87	12.44
O60361	Putative nucleoside diphosphate kinase OS=Homo sapiens GN=NME2P1 PE=5 SV=1 - [NDK8_HUMAN]	56.93	19.71	19.71	19.71	26.28	33.58	33.58	26.28	32.85	42.34	18.98	26.28	19.71	26.28	7.3	19.71	33.58	12.41	12.41	13.87	26.28
Q96DE0	U8 snoRNA-decapping enzyme OS=Homo sapiens GN=NUDT16 PE=1 SV=2 - [NUD16_HUMAN]	56.92		12.31	14.87			6.67						9.74		11.28	7.69					12.31
O75223	Gamma-glutamylcyclotransferase OS=Homo sapiens GN=GGCT PE=1 SV=1 - [GGCT_HUMAN]	56.91		5.85	5.32	14.36	9.04						5.32	5.32			6.91	6.91		5.85	18.62
Q9BSH4	Translational activator of cytochrome c oxidase 1 OS=Homo sapiens GN=TACO1 PE=1 SV=1 - [TACO1_HUMAN]	56.9						26.94	8.75	8.75	6.73		6.06	2.69		11.11	17.85		7.07	7.41		3.37
P11498	Pyruvate carboxylase, mitochondrial OS=Homo sapiens GN=PC PE=1 SV=2 - [PYC_HUMAN]	56.88	2.55	9.76	4.5	3.31	4.67	5.94	11.21	6.28	1.7	2.55	6.62	1.1	7.72	2.8	2.04	3.65	1.36	8.49	3.57	5.69
E7ES33	Septin-7 OS=Homo sapiens GN=SEPT7 PE=2 SV=2 - [E7ES33_HUMAN]	56.88	2.29	5.28	2.06	3.21	8.72	5.5		2.75	3.9	11.93		7.11	2.29	3.9	2.06	5.5	15.14	6.65	7.57	6.88
P31930	Cytochrome b-c1 complex subunit 1, mitochondrial OS=Homo sapiens GN=UQCRC1 PE=1 SV=3 - [QCR1_HUMAN]	56.88		3.96	5.42	7.08	3.96	2.5	1.67	4.17	4.17	6.25	9.17	13.75	6.88	9.38	7.5		2.92	6.67	6.67	7.92
O60488-2	Isoform Short of Long-chain-fatty-acid--CoA ligase 4 OS=Homo sapiens GN=ACSL4 - [ACSL4_HUMAN]	56.87	10.3	4.18	5.07		3.13	4.18	4.18	2.69	2.99	6.57	4.63	8.81	5.37	11.19	5.22	9.1	4.78	6.57	4.33	3.58
E9PL69	Ribonucleoside-diphosphate reductase large subunit OS=Homo sapiens GN=RRM1 PE=2 SV=1 - [E9PL69_HUMAN]	56.84	5.09	13.86	11.75		2.28	2.28	10.35	10.35	8.6	3.68	12.11	5.09	17.19		3.33	8.77	6.67	14.91	8.77	17.54
B4E3L0	WD40 repeat-containing protein SMU1 OS=Homo sapiens GN=SMU1 PE=2 SV=1 - [B4E3L0_HUMAN]	56.82	4.26	5.4	6.82	5.11		5.97	7.39					16.48	5.68	13.07	13.35	3.69		5.68		2.84
P35250	Replication factor C subunit 2 OS=Homo sapiens GN=RFC2 PE=1 SV=3 - [RFC2_HUMAN]	56.78	2.54	2.54			3.39	3.67	11.02	2.82	1.98	9.04	4.24	1.98	5.37	8.47	4.52	13.84	5.65	13.56	13.56	7.91
Q04837	Single-stranded DNA-binding protein, mitochondrial OS=Homo sapiens GN=SSBP1 PE=1 SV=1 - [SSBP_HUMAN]	56.76			19.59	10.14	10.14	16.22	16.22		12.16	17.57	6.08	12.84					8.78		13.51
Q96B49	Mitochondrial import receptor subunit TOM6 homolog OS=Homo sapiens GN=TOMM6 PE=1 SV=1 - [TOM6_HUMAN]	56.76							18.92					37.84
O43396	Thioredoxin-like protein 1 OS=Homo sapiens GN=TXNL1 PE=1 SV=3 - [TXNL1_HUMAN]	56.75	5.88	18.34	6.57	18.34	14.53				6.23	14.19	7.96		6.57	7.96	17.65			5.19	7.61	18.34
Q9Y3C1	Nucleolar protein 16 OS=Homo sapiens GN=NOP16 PE=1 SV=2 - [NOP16_HUMAN]	56.74	6.18	16.29				3.93	3.93		11.8	7.87					8.43	15.73	24.16			16.29
P56537	Eukaryotic translation initiation factor 6 OS=Homo sapiens GN=EIF6 PE=1 SV=1 - [IF6_HUMAN]	56.73	4.49	5.71		9.39	13.47	15.1	19.59	23.67		7.35	7.35				10.2				5.71	5.71
P27348	14-3-3 protein theta OS=Homo sapiens GN=YWHAQ PE=1 SV=1 - [1433T_HUMAN]	56.73	12.65	18.78	28.16	27.76	17.55	13.06	8.16	12.24	8.98	13.06	13.47	12.65	10.61	15.51	11.43	19.59	19.59	19.59	4.08	7.76
P51151	Ras-related protein Rab-9A OS=Homo sapiens GN=RAB9A PE=1 SV=1 - [RAB9A_HUMAN]	56.72		6.47	6.97	6.97	12.44	6.97	6.47	6.47			5.97	10.45					7.96	7.96
Q9BY32	Inosine triphosphate pyrophosphatase OS=Homo sapiens GN=ITPA PE=1 SV=2 - [ITPA_HUMAN]	56.7	8.25	10.82			12.89	4.64		4.12	10.82	5.15	5.15	15.46	8.25	8.76	13.4	14.95			6.19	19.07
P07951-2	Isoform 2 of Tropomyosin beta chain OS=Homo sapiens GN=TPM2 - [TPM2_HUMAN]	56.69		8.1	11.62	6.69	8.8	7.04	19.72	16.2	5.28	10.21	10.92	15.85	5.63	8.45	17.25	7.04	12.68	12.32	4.58	8.1
B8ZZU8	Transcription elongation factor B (SIII), polypeptide 2 (18kDa, elongin B), isoform CRA_b OS=Homo sapiens GN=TCEB2 PE=2 SV=1 - [B8ZZU8_HUMAN]	56.64			17.7	10.62	10.62	32.74	8.85					22.12			7.96	7.96		7.08	7.08
Q8WUD4	Coiled-coil domain-containing protein 12 OS=Homo sapiens GN=CCDC12 PE=1 SV=1 - [CCD12_HUMAN]	56.63	22.89		28.92					7.23				7.83	6.02	11.45	11.45		7.23	4.22
P63151	Serine/threonine-protein phosphatase 2A 55 kDa regulatory subunit B alpha isoform OS=Homo sapiens GN=PPP2R2A PE=1 SV=1 - [2ABA_HUMAN]	56.6		7.38		2.91		2.46	12.98	12.98	4.47	6.94	4.03		2.68		3.36		1.57	5.59	16.55	19.02
F5GX77	tRNA methyltransferase 112 homolog OS=Homo sapiens GN=TRMT112 PE=2 SV=1 - [F5GX77_HUMAN]	56.6				6.6	11.32	11.32	11.32	13.21	25.47	12.26	12.26						13.21	13.21
P04792	Heat shock protein beta-1 OS=Homo sapiens GN=HSPB1 PE=1 SV=2 - [HSPB1_HUMAN]	56.59	6.34	4.39	8.29	15.61	22.44	15.12	20.49	20.49	10.24	10.24	5.37		8.29	12.68	7.8	16.1	26.34	19.51	25.37	21.46
Q9Y3C4	TP53RK-binding protein OS=Homo sapiens GN=TPRKB PE=1 SV=1 - [TPRKB_HUMAN]	56.57	10.29						8	12										10.86		23.43
K7EKE6	Lon protease homolog OS=Homo sapiens GN=LONP1 PE=3 SV=1 - [K7EKE6_HUMAN]	56.57	1.66	7.81	12.07	3.67	9.94	4.97	7.93	10.18	1.89	1.18	2.49	8.88	5.56	9.59	4.85	6.04	3.79	6.04	12.9	14.56
D6RDA2	Protein DEK (Fragment) OS=Homo sapiens GN=DEK PE=2 SV=1 - [D6RDA2_HUMAN]	56.56		8.2		7.38	5.74	9.84	9.84	16.39	10.66				8.2	10.66				7.38	7.38	8.2
C9JDQ1	Mannosyl-oligosaccharide glucosidase (Fragment) OS=Homo sapiens GN=MOGS PE=2 SV=1 - [C9JDQ1_HUMAN]	56.55								4.83	10.34			16.55		16.55	8.97	8.97	8.97	6.9	6.9
P62304	Small nuclear ribonucleoprotein E OS=Homo sapiens GN=SNRPE PE=1 SV=1 - [RUXE_HUMAN]	56.52	27.17	27.17	27.17				13.04		11.96			44.57							27.17	27.17
P15311	Ezrin OS=Homo sapiens GN=EZR PE=1 SV=4 - [EZRI_HUMAN]	56.48	9.9	9.39	1.37	1.71	8.02	11.77	14.85	18.09	11.43	16.89	7.85	8.7	7.34	11.77	9.9	10.75	8.53	6.14	2.56	10.75
A6NDU8	UPF0600 protein C5orf51 OS=Homo sapiens GN=C5orf51 PE=1 SV=1 - [CE051_HUMAN]	56.46		12.93		9.52	8.16	14.63		6.8	11.56	6.12	3.06	15.31		4.76			5.44
P18124	60S ribosomal protein L7 OS=Homo sapiens GN=RPL7 PE=1 SV=1 - [RL7_HUMAN]	56.45		19.76	15.73	22.58	17.34	12.9	10.08		15.32	3.63	3.63	14.92	7.66	11.29	9.68	15.73	18.15	11.29	19.76	17.34
Q9Y6M9	NADH dehydrogenase [ubiquinone] 1 beta subcomplex subunit 9 OS=Homo sapiens GN=NDUFB9 PE=1 SV=3 - [NDUB9_HUMAN]	56.42				10.61	10.61			7.82	5.03			7.82	5.03	7.82			8.94		11.17
Q8IVT2	Uncharacterized protein C19orf21 OS=Homo sapiens GN=C19orf21 PE=1 SV=1 - [CS021_HUMAN]	56.41	8.84	1.33	4.86	4.71	8.98	9.72	2.21	2.21	8.1	7.81	7.07	4.27	7.66	6.04	1.18	2.8	4.86	14.29	5.3	2.21
P05455	Lupus La protein OS=Homo sapiens GN=SSB PE=1 SV=2 - [LA_HUMAN]	56.37	10.29	9.07	9.07	4.41	5.39	8.58	7.6	8.82	11.76	11.52	11.27	18.38	5.15	11.76	8.33	11.76	11.03	9.56	7.35	10.78
Q16891-2	Isoform 2 of Mitochondrial inner membrane protein OS=Homo sapiens GN=IMMT - [IMMT_HUMAN]	56.36	3.35	8.57	4.02	5.35	3.35	5.22	8.43	11.78	10.71	14.19	11.11	2.95	7.1	9.91	9.5	13.52	6.96	5.09	2.41	6.29
P06899	Histone H2B type 1-J OS=Homo sapiens GN=HIST1H2BJ PE=1 SV=3 - [H2B1J_HUMAN]	56.35	19.05	11.9	11.9	24.6	33.33	27.78	26.19	27.78	11.9	7.14	17.46	24.6	27.78	30.16	27.78	26.19	24.6	26.19	11.9	19.05
P11142	Heat shock cognate 71 kDa protein OS=Homo sapiens GN=HSPA8 PE=1 SV=1 - [HSP7C_HUMAN]	56.35	8.2	21.98	14.55	9.44	14.4	8.82	17.49	17.8	15.17	23.22	19.97	8.82	25.23	11.61	9.91	7.43	9.29	23.07	16.25	21.05
P48147	Prolyl endopeptidase OS=Homo sapiens GN=PREP PE=1 SV=2 - [PPCE_HUMAN]	56.34	8.87	5.35	6.2			2.39	2.68	2.68	2.54	6.76	9.86	7.46	3.38	3.66	2.96	5.77	4.08	8.45	6.76	1.55
O76021	Ribosomal L1 domain-containing protein 1 OS=Homo sapiens GN=RSL1D1 PE=1 SV=3 - [RL1D1_HUMAN]	56.33	8.98	8.78	2.65	4.08	7.55	4.08	6.12	12.45	3.88	3.88	4.49	8.98	1.43	13.47	10.41	6.33	8.78	15.1	12.04	11.22
Q7L1Q6	Basic leucine zipper and W2 domain-containing protein 1 OS=Homo sapiens GN=BZW1 PE=1 SV=1 - [BZW1_HUMAN]	56.32	6.68	2.63	2.63	16.95	2.39	7.64	14.56	20.05	3.58	5.97	7.88	7.16	2.86	9.07	6.92	2.39	8.11	6.68	1.43	2.63
P62805	Histone H4 OS=Homo sapiens GN=HIST1H4A PE=1 SV=2 - [H4_HUMAN]	56.31	29.13	19.42	9.71		9.71	21.36	9.71	9.71	40.78	30.1	30.1	19.42	19.42	9.71	27.18	17.48	9.71	41.75	32.04	19.42
Q14254	Flotillin-2 OS=Homo sapiens GN=FLOT2 PE=1 SV=2 - [FLOT2_HUMAN]	56.31	2.8	6.54		3.27	2.57	4.91	6.54	4.67	11.21		1.64	7.01	3.04	6.31	11.92	8.18		3.04	3.27	7.01
P11021	78 kDa glucose-regulated protein OS=Homo sapiens GN=HSPA5 PE=1 SV=2 - [GRP78_HUMAN]	56.27	7.65	15.14	11.31	7.19	11.31	18.35	19.88	21.41	26.61	19.57	17.43	16.36	21.56	12.69	21.87	16.06	24.16	22.02	18.5	13.46
P62312	U6 snRNA-associated Sm-like protein LSm6 OS=Homo sapiens GN=LSM6 PE=1 SV=1 - [LSM6_HUMAN]	56.25	13.75				10		22.5	10		25	25		13.75						8.75	8.75
P51858	Hepatoma-derived growth factor OS=Homo sapiens GN=HDGF PE=1 SV=1 - [HDGF_HUMAN]	56.25	36.67	4.17	4.58	3.75		4.17	4.17	3.33	6.67	6.67		7.08	17.5	11.25	4.17	4.17		7.08	11.25	15.83
Q9C0B1	Alpha-ketoglutarate-dependent dioxygenase FTO OS=Homo sapiens GN=FTO PE=1 SV=3 - [FTO_HUMAN]	56.24	5.35	3.56	9.11	6.14	10.69	6.34	7.92		3.96	1.78	2.18		6.73		4.95	11.29	10.89			6.34
O43865	Putative adenosylhomocysteinase 2 OS=Homo sapiens GN=AHCYL1 PE=1 SV=2 - [SAHH2_HUMAN]	56.23	4.91	4.53	3.96	3.4	6.79	9.25		4.91	9.25	7.36	1.13	10.75		3.77	6.23	5.09	2.26		3.4	12.64
Q8IVD9	NudC domain-containing protein 3 OS=Homo sapiens GN=NUDCD3 PE=1 SV=3 - [NUDC3_HUMAN]	56.23	4.16			6.37	4.99			3.05	6.93		9.7	8.31			4.99		9.14	5.54
Q9Y2T2	AP-3 complex subunit mu-1 OS=Homo sapiens GN=AP3M1 PE=1 SV=1 - [AP3M1_HUMAN]	56.22	12.92	3.59	4.31		5.98	5.98	1.91	9.81	2.39	2.39	4.78	4.07	6.7	5.02					3.59	1.67
P31949	Protein S100-A11 OS=Homo sapiens GN=S100A11 PE=1 SV=2 - [S10AB_HUMAN]	56.19	15.24	19.05	10.48	10.48	8.57	34.29	8.57	25.71	25.71	15.24		15.24	10.48	12.38	42.86	30.48	30.48	15.24	20	35.24
Q5R3B4	Mitochondrial pyruvate carrier 2 (Fragment) OS=Homo sapiens GN=MPC2 PE=2 SV=1 - [Q5R3B4_HUMAN]	56.19									20.95	22.86	7.62			16.19
O75531	Barrier-to-autointegration factor OS=Homo sapiens GN=BANF1 PE=1 SV=1 - [BAF_HUMAN]	56.18		26.97	26.97		26.97	29.21			13.48	13.48	13.48		26.97		13.48	13.48				26.97
H0Y4R1	Inosine-5'-monophosphate dehydrogenase 2 (Fragment) OS=Homo sapiens GN=IMPDH2 PE=3 SV=1 - [H0Y4R1_HUMAN]	56.17	14.26	5.74	9.79			8.09	16.81	17.02	6.81	6.81	5.32	13.62	18.94	15.74	17.02	26.6	14.47	17.87	9.57	1.7
B0FLL2	6-phosphofructo-2-kinase/fructose-2, 6-bisphosphatase 2 transcript variant 3 OS=Homo sapiens GN=PFKFB2 PE=2 SV=1 - [B0FLL2_HUMAN]	56.14	3.39	5.51	4.45	9.32	2.54		7.2			2.97	4.45	9.11		5.3	6.57	3.6	1.69	1.91	10.59	8.26
Q16719	Kynureninase OS=Homo sapiens GN=KYNU PE=1 SV=1 - [KYNU_HUMAN]	56.13	8.39	8.17	7.31	10.97	2.8	7.96	5.38	6.24	7.96	10.11	6.45	5.38	15.05	5.16	3.23	9.89		5.81	4.73	10.75
J3KPV4	DNA replication licensing factor MCM4 OS=Homo sapiens GN=MCM4 PE=3 SV=1 - [J3KPV4_HUMAN]	56.12	8.47	2.12		4	6	6	3.41	1.88	5.53	4.94	4.35	14.47	6.35	9.18	10.12	10.82	10.82		5.18	6
P60900	Proteasome subunit alpha type-6 OS=Homo sapiens GN=PSMA6 PE=1 SV=1 - [PSA6_HUMAN]	56.1	4.47	10.16	9.35	4.07	9.35	4.07	13.41	13.41	4.88	4.88			5.28	12.2	15.45	17.07	17.48	4.88	25.2	5.28
P82663	28S ribosomal protein S25, mitochondrial OS=Homo sapiens GN=MRPS25 PE=1 SV=1 - [RT25_HUMAN]	56.07	11.56	9.25	9.83					5.2			11.56	4.05					6.36	5.78		6.94
Q93096	Protein tyrosine phosphatase type IVA 1 OS=Homo sapiens GN=PTP4A1 PE=1 SV=2 - [TP4A1_HUMAN]	56.07	14.45		6.94	17.92	23.7	18.5	7.51	8.67	20.81				4.62			4.62	8.09	12.72	8.09	4.62
Q00341	Vigilin OS=Homo sapiens GN=HDLBP PE=1 SV=2 - [VIGLN_HUMAN]	56.07	4.34	5.91	2.84	5.44	6.15	8.91	9.7	9.78	6.55	3.55		8.36	3	10.57	8.12	3.08	3.63	2.05	4.81	5.44
O94905	Erlin-2 OS=Homo sapiens GN=ERLIN2 PE=1 SV=1 - [ERLN2_HUMAN]	56.05	2.65			15.34	9.44	3.54			5.9	2.95		3.24		10.62			10.62	7.96	10.32	5.9
O60825-2	Isoform 2 of 6-phosphofructo-2-kinase/fructose-2,6-bisphosphatase 2 OS=Homo sapiens GN=PFKFB2 - [F262_HUMAN]	56.05	3.4	2.76	4.46	9.34	2.55		7.22				4.46	9.13	2.76	5.31	6.58	3.61	1.7	1.91	10.62	8.28
P32929	Cystathionine gamma-lyase OS=Homo sapiens GN=CTH PE=1 SV=3 - [CGL_HUMAN]	56.05		7.65	7.65			8.89	3.95	3.95	4.69	4.69	13.09	3.21	10.86	6.67	16.05	3.46	3.21	3.21	9.63	14.57
P55145	Mesencephalic astrocyte-derived neurotrophic factor OS=Homo sapiens GN=MANF PE=1 SV=3 - [MANF_HUMAN]	56.04	3.85	7.69	12.09		6.04	5.49	9.34	21.43	17.58	17.58	9.34	9.89					4.4	10.44	13.19	15.93
P62917	60S ribosomal protein L8 OS=Homo sapiens GN=RPL8 PE=1 SV=2 - [RL8_HUMAN]	56.03		7	2.72			2.72	22.18	32.68	15.18	20.23	8.17	6.23	8.17	10.51	10.51	10.51	6.23	18.29	10.89	3.11
Q06124-2	Isoform 2 of Tyrosine-protein phosphatase non-receptor type 11 OS=Homo sapiens GN=PTPN11 - [PTN11_HUMAN]	55.99			10.29	5.56	4.55	2.19	7.25	5.23	5.23	2.36	5.06	2.53	7.08	3.37	4.55		8.77	2.02	5.4	2.53
P25787	Proteasome subunit alpha type-2 OS=Homo sapiens GN=PSMA2 PE=1 SV=2 - [PSA2_HUMAN]	55.98	5.98			5.98	14.1	14.53	17.09	8.97			19.23	5.98	9.83	5.98	4.27					2.99
Q02818	Nucleobindin-1 OS=Homo sapiens GN=NUCB1 PE=1 SV=4 - [NUCB1_HUMAN]	55.97	8.03	3.04	12.15	5.42	1.95	2.17	14.1	5.64	5.86	8.24	5.42		3.9			2.82	4.56		3.47
J3KP15	Serine/arginine-rich-splicing factor 2 (Fragment) OS=Homo sapiens GN=SRSF2 PE=4 SV=1 - [J3KP15_HUMAN]	55.97		18.66	5.97		11.94	11.94	11.94	11.94	11.19	5.22		18.66	30.6						12.69	26.87
Q96BM9	ADP-ribosylation factor-like protein 8A OS=Homo sapiens GN=ARL8A PE=1 SV=1 - [ARL8A_HUMAN]	55.91				12.9			4.84	12.37	4.84	4.84	8.6		17.74		5.38	5.38		15.05	12.37
P15924	Desmoplakin OS=Homo sapiens GN=DSP PE=1 SV=3 - [DESP_HUMAN]	55.9	3.17	7.07	3.45	2.4	2.79	4.95	2.82	3.94	4.25	2.16	3.59	7.24	2.16	10.17	5.33	7.98	4.35	4.21	3.76	6.62
P56277	Cx9C motif-containing protein 4 OS=Homo sapiens GN=CMC4 PE=1 SV=1 - [CMC4_HUMAN]	55.88	16.18								14.71			16.18							25
Q15257	Serine/threonine-protein phosphatase 2A activator OS=Homo sapiens GN=PPP2R4 PE=1 SV=3 - [PTPA_HUMAN]	55.87	3.63	2.79	2.79				3.35	3.91	6.7		8.1	2.79	10.89	3.07	3.63	7.82	13.97	5.87	3.63
Q9NWT1	p21-activated protein kinase-interacting protein 1 OS=Homo sapiens GN=PAK1IP1 PE=1 SV=2 - [PK1IP_HUMAN]	55.87	5.36	7.91	12.24	3.57	14.54	17.6	9.69	7.4		2.3	9.18	4.34	2.81	6.89		4.34				8.42
Q9UI09	NADH dehydrogenase [ubiquinone] 1 alpha subcomplex subunit 12 OS=Homo sapiens GN=NDUFA12 PE=1 SV=1 - [NDUAC_HUMAN]	55.86	8.97	16.55	11.72	14.48		24.14	8.28	5.52	5.52	5.52	8.97	8.97					6.21	5.52
Q15717	ELAV-like protein 1 OS=Homo sapiens GN=ELAVL1 PE=1 SV=2 - [ELAV1_HUMAN]	55.83	3.99		7.67	7.67	2.76	7.98	5.52	5.52	3.37	7.98	3.37		7.36	7.06	8.59	3.37	2.15	5.83	10.12	7.36
P53618	Coatomer subunit beta OS=Homo sapiens GN=COPB1 PE=1 SV=3 - [COPB_HUMAN]	55.82	7.56	3.15	1.89	5.04	8.5	8.08	8.08	11.75	9.97	9.34	3.78	3.67	6.19	3.78	3.78	5.98	1.05	7.24	4.41	5.46
P48059-2	Isoform 2 of LIM and senescent cell antigen-like-containing domain protein 1 OS=Homo sapiens GN=LIMS1 - [LIMS1_HUMAN]	55.79		2.08		5.93		3.26	3.26	9.79	4.75	9.2		3.56			8.31	3.56	3.56	2.97	7.12
Q8WUY1	Protein THEM6 OS=Homo sapiens GN=THEM6 PE=1 SV=2 - [THEM6_HUMAN]	55.77					3.85	4.81	9.13		16.35	17.79	12.5	11.06		7.69			4.81	8.65	3.85	5.77
Q9NUP1	Biogenesis of lysosome-related organelles complex 1 subunit 4 OS=Homo sapiens GN=BLOC1S4 PE=1 SV=1 - [BL1S4_HUMAN]	55.76	4.61	10.14		8.29				14.75	5.99	5.53	5.53	6.45
Q9NP73-2	Isoform 2 of UDP-N-acetylglucosamine transferase subunit ALG13 homolog OS=Homo sapiens GN=ALG13 - [ALG13_HUMAN]	55.76					22.42	10.91									11.52	13.33	6.67	15.15
Q07000	HLA class I histocompatibility antigen, Cw-15 alpha chain OS=Homo sapiens GN=HLA-C PE=1 SV=1 - [1C15_HUMAN]	55.74	13.66	6.83					5.74	2.73			7.92	8.2	9.29	15.85	8.2	14.75	6.83	3.28	3.28	6.56
C9JNE2	O-acetyl-ADP-ribose deacetylase 1 (Fragment) OS=Homo sapiens GN=OARD1 PE=2 SV=1 - [C9JNE2_HUMAN]	55.73		7.63	7.63	7.63			6.11			9.16	19.08		5.34							9.92
P16949	Stathmin OS=Homo sapiens GN=STMN1 PE=1 SV=3 - [STMN1_HUMAN]	55.7	37.58	20.81			6.04			8.05	16.78	8.05	8.05	9.4	18.12	5.37			9.4	8.72	15.44	14.09
H0YM70	Proteasome activator complex subunit 2 OS=Homo sapiens GN=PSME2 PE=2 SV=1 - [H0YM70_HUMAN]	55.7	15.79	10.96			6.14	12.72	10.53	4.39			10.53	5.26	15.79	5.26	5.26	5.26	12.72	12.72	23.25	10.53
P67936	Tropomyosin alpha-4 chain OS=Homo sapiens GN=TPM4 PE=1 SV=3 - [TPM4_HUMAN]	55.65	10.89	7.66	18.55	19.76	10.48	14.11	18.55	9.27		11.69	20.56		25	4.44	6.05	14.92	14.92	9.68	5.65	3.63
P06753-2	Isoform 2 of Tropomyosin alpha-3 chain OS=Homo sapiens GN=TPM3 - [TPM3_HUMAN]	55.65	13.71	11.29	8.06	18.55	17.74	18.55	9.27	14.92	4.03	11.29	16.13	10.48	6.05	12.9	14.11	11.29	6.45	8.87	10.08	12.9
P49591	Serine--tRNA ligase, cytoplasmic OS=Homo sapiens GN=SARS PE=1 SV=3 - [SYSC_HUMAN]	55.64	5.64	7	9.92	18.48	15.37	4.09	5.25	14.4	2.14	5.45	7.59	7.39	9.53	10.12	9.92	2.53		2.72	4.47	5.64
P41236	Protein phosphatase inhibitor 2 OS=Homo sapiens GN=PPP1R2 PE=1 SV=2 - [IPP2_HUMAN]	55.61	21.95			10.24			12.2	7.32	7.32	17.56		5.37		5.37	5.37	12.68		7.32
Q6P1K2	Polyamine-modulated factor 1 OS=Homo sapiens GN=PMF1 PE=1 SV=2 - [PMF1_HUMAN]	55.61	7.32	10.24		4.88		4.39	8.78	6.34	8.78	8.78		15.12		7.8	7.8		5.85	5.85		10.24
E7EU96	Casein kinase II subunit alpha OS=Homo sapiens GN=CSNK2A1 PE=2 SV=1 - [E7EU96_HUMAN]	55.58	5.45	17.4			9.35	9.35	3.38	5.71	7.27	7.27	3.12	10.39	10.13	8.83	4.68	3.9	8.31	3.9	4.68	12.47
P33176	Kinesin-1 heavy chain OS=Homo sapiens GN=KIF5B PE=1 SV=1 - [KINH_HUMAN]	55.56	2.08	1.45	4.78	3.12	1.77	6.85	4.67	5.3	6.33	8.72	8.52	3.95	7.79	3.32	7.68	4.26	5.61	8.31	5.09	9.03
P25789	Proteasome subunit alpha type-4 OS=Homo sapiens GN=PSMA4 PE=1 SV=1 - [PSA4_HUMAN]	55.56	2.68	9.96	6.13	16.86	12.64	3.45		8.43	2.68				13.03	3.45	3.45	3.45	13.41	16.48	6.13	9.96
E7ESM9	Calpastatin OS=Homo sapiens GN=CAST PE=2 SV=1 - [E7ESM9_HUMAN]	55.53	12.48	6.37	10.66	10.4	7.93	9.88	6.63	5.98	2.99		7.28	3.12	5.33	4.16	7.93	11.44	3.38	1.95	8.45	6.89
P09874	Poly [ADP-ribose] polymerase 1 OS=Homo sapiens GN=PARP1 PE=1 SV=4 - [PARP1_HUMAN]	55.52	7.2	7.59	6.61	7.3	13.61	12.62	7.59	8.97	9.37	8.78	8.58	5.82	6.31	2.76	6.71	9.07	5.72	9.17	5.03	7.99
P27816-6	Isoform 6 of Microtubule-associated protein 4 OS=Homo sapiens GN=MAP4 - [MAP4_HUMAN]	55.51	6.52	9.25	6.17	1.67		1.15	3.35	3.17	0.88	5.2	3.52	10.75	9.07	8.19	13.48	10.93	5.11	9.34	12.6	15.42
P09525	Annexin A4 OS=Homo sapiens GN=ANXA4 PE=1 SV=4 - [ANXA4_HUMAN]	55.49	10.34	10.34	8.78	5.02	10.66		2.19	3.76	7.52	5.02	5.02	6.9	2.82	6.9	5.96	7.52	9.72	9.72	4.7	6.9
Q14914-2	Isoform 2 of Prostaglandin reductase 1 OS=Homo sapiens GN=PTGR1 - [PTGR1_HUMAN]	55.48	4.65	9.63	7.64	7.64			3.32	7.64	6.31	6.31		4.65		4.98	16.61	15.61	12.29	18.94	15.28	19.27
P47897	Glutamine--tRNA ligase OS=Homo sapiens GN=QARS PE=1 SV=1 - [SYQ_HUMAN]	55.48	5.94	9.94	12.26	4.9	2.32	1.16	4.26	9.42	6.71	3.23		3.23	9.16	7.74	4	6.45		2.71	9.55	11.23
P68402	Platelet-activating factor acetylhydrolase IB subunit beta OS=Homo sapiens GN=PAFAH1B2 PE=1 SV=1 - [PA1B2_HUMAN]	55.46	24.89								3.93	9.17	4.37	16.59					18.34	12.66	8.3
J3QRK5	Protein UBBP4 OS=Homo sapiens GN=UBBP4 PE=4 SV=1 - [J3QRK5_HUMAN]	55.46	27.95	33.19	33.19	18.34	19.65	13.54	24.02	5.24				13.97		21.83	21.83	23.58	31.44	17.47	17.47	24.02
Q13263	Transcription intermediary factor 1-beta OS=Homo sapiens GN=TRIM28 PE=1 SV=5 - [TIF1B_HUMAN]	55.45	8.26	1.08	6.35	6.95	4.55	4.55	2.63	4.55	7.31		5.75	10.3	4.79	12.46		1.2	5.99	4.31	4.31	6.11
E9PPU0	Epiplakin OS=Homo sapiens GN=EPPK1 PE=4 SV=1 - [E9PPU0_HUMAN]	55.45	2.48	3.55	8.76	6.4	5.45	4.83	7.85	8.18	2.48	3.06	6.98	5.7	6.86	4.92	2.11	4.13	3.88	5.87	2.64	4.5
Q8IUF1	COBW domain-containing protein 2 OS=Homo sapiens GN=CBWD2 PE=1 SV=1 - [CBWD2_HUMAN]	55.44	8.61					3.04	3.29	2.78	3.54	7.09	7.09	4.56			4.3	9.11	5.57
Q14116	Interleukin-18 OS=Homo sapiens GN=IL18 PE=1 SV=1 - [IL18_HUMAN]	55.44	8.81				4.66	8.81						8.81	4.66	11.92	11.92	11.92		26.94	19.17	6.22
Q9BUP3-3	Isoform 3 of Oxidoreductase HTATIP2 OS=Homo sapiens GN=HTATIP2 - [HTAI2_HUMAN]	55.43		7.97	7.97		3.62	16.67	4.71	3.26	5.8	6.88	10.14	2.9	6.52	3.62		4.71	4.71		6.88	3.99
G3V1K0	Thioredoxin-like 1, isoform CRA_b OS=Homo sapiens GN=TXNL1 PE=2 SV=1 - [G3V1K0_HUMAN]	55.42		11.45		18.67	12.05				4.22	4.22		5.42		13.86	13.86			9.04	13.25	11.45
Q9BRP8	Partner of Y14 and mago OS=Homo sapiens GN=WIBG PE=1 SV=1 - [WIBG_HUMAN]	55.39	15.2				5.39	13.73	22.06	5.39	7.84		10.29	8.82	6.37				6.86	14.22	6.86
B7Z254	Protein disulfide-isomerase A6 OS=Homo sapiens GN=PDIA6 PE=2 SV=1 - [B7Z254_HUMAN]	55.38	13.96	5.49	14.19	14.19	14.87	14.65	7.78	24.71	11.44	21.51	8.7	24.26	14.65	16.48	6.86	11.44	5.26	10.07	6.18	5.49
Q16181	Septin-7 OS=Homo sapiens GN=SEPT7 PE=1 SV=2 - [SEPT7_HUMAN]	55.38	5.03	5.26	2.06	3.2	8.7	5.49		2.75	3.89	7.78		7.09	5.03	3.89	2.06	5.49	15.1	6.64	7.55	6.86
Q13217	DnaJ homolog subfamily C member 3 OS=Homo sapiens GN=DNAJC3 PE=1 SV=1 - [DNJC3_HUMAN]	55.36	5.95	6.15	3.77	3.37	8.33	4.56	6.35	1.59	6.55	11.11	3.17	3.57	12.5	5.16	3.37	1.79	5.95			4.17
Q9H0P0	Cytosolic 5'-nucleotidase 3 OS=Homo sapiens GN=NT5C3 PE=1 SV=3 - [5NT3_HUMAN]	55.36	3.87	11.61	7.44				9.82	6.55		2.68	3.87	7.44					4.17	4.76	9.23	8.33
Q7L2H7	Eukaryotic translation initiation factor 3 subunit M OS=Homo sapiens GN=EIF3M PE=1 SV=1 - [EIF3M_HUMAN]	55.35	5.88	15.24	5.88	2.67	5.35	5.35	2.94	11.76	3.48		7.75				5.08	12.57	4.81	11.23	11.23	16.58
P49327	Fatty acid synthase OS=Homo sapiens GN=FASN PE=1 SV=3 - [FAS_HUMAN]	55.32	3.39	5.81	4.86	5.85	3.42	5.38	7.09	5.38	7.53	3.9	6.21	5.81	8.64	7.41	7.93	6.93	8.36	9	8.04	4.82
P67936-2	Isoform 2 of Tropomyosin alpha-4 chain OS=Homo sapiens GN=TPM4 - [TPM4_HUMAN]	55.28	5.63	3.17	15.49	15.85	3.87	12.68	7.04	3.87		10.21	17.96		22.89		3.17	13.73	8.8	8.1		3.17
P07951	Tropomyosin beta chain OS=Homo sapiens GN=TPM2 PE=1 SV=1 - [TPM2_HUMAN]	55.28		8.1	11.62	10.92	8.8	7.04	12.68	9.15	5.28	15.85	10.92	3.87	5.63	3.87	13.03	7.04	12.68	16.9	4.58	8.1
Q99798	Aconitate hydratase, mitochondrial OS=Homo sapiens GN=ACO2 PE=1 SV=2 - [ACON_HUMAN]	55.26	14.49	8.59	3.72	4.74	8.46	5.9	5.13	5.13	5.26	10.77	9.23	10.51	12.18	2.95	8.59	2.44	1.92	11.79	7.05	5.51
P13667	Protein disulfide-isomerase A4 OS=Homo sapiens GN=PDIA4 PE=1 SV=2 - [PDIA4_HUMAN]	55.19	22.17	12.87	7.44	10.54	7.6	9.61	13.95	12.4	13.64	8.06	11.01	20.47	23.72	9.46	3.41	6.67		11.47	4.96	5.89
Q9P2J5	Leucine--tRNA ligase, cytoplasmic OS=Homo sapiens GN=LARS PE=1 SV=2 - [SYLC_HUMAN]	55.19	7.65	3.23	2.98	8.08	10.71	7.14	5.1	3.4	8.84	5.02	2.47	6.38	5.7	6.04	3.74	8.5	8.33	6.21	3.49	1.96
Q99460	26S proteasome non-ATPase regulatory subunit 1 OS=Homo sapiens GN=PSMD1 PE=1 SV=2 - [PSMD1_HUMAN]	55.19	3.99	4.51		6.61	5.56	6.72	5.46	8.5	9.97	6.61	6.19	5.67	4.2	6.51	3.36	5.14	3.88	4.72	7.97	6.61
P07099	Epoxide hydrolase 1 OS=Homo sapiens GN=EPHX1 PE=1 SV=1 - [HYEP_HUMAN]	55.16	1.98			3.96	15.82	8.13	18.24	15.6	16.04	9.67	3.08	4.84	4.18	8.57	1.54	3.96			14.07	14.95
P17812	CTP synthase 1 OS=Homo sapiens GN=CTPS1 PE=1 SV=2 - [PYRG1_HUMAN]	55.16	3.72	13.71	4.4		7.28	3.55	5.58	8.97	8.29	5.41	8.46		3.72	2.37	8.46	2.03	3.21	8.46	7.78	18.1
Q13283	Ras GTPase-activating protein-binding protein 1 OS=Homo sapiens GN=G3BP1 PE=1 SV=1 - [G3BP1_HUMAN]	55.15	9.01	15.67	8.8	2.79	2.58		5.79	10.3	14.59	7.08	18.03	12.88	9.01	7.94	6.44	10.3	5.36	5.79		5.79
P37108	Signal recognition particle 14 kDa protein OS=Homo sapiens GN=SRP14 PE=1 SV=2 - [SRP14_HUMAN]	55.15	28.68				10.29	10.29		10.29		6.62		7.35	21.32		8.82		10.29	9.56	9.56	9.56
P50402	Emerin OS=Homo sapiens GN=EMD PE=1 SV=1 - [EMD_HUMAN]	55.12	4.72	3.54		4.33	5.91	9.84	3.94					4.72		6.69	19.29	17.72	13.39	12.2	16.14	3.54
P35613-3	Isoform 3 of Basigin OS=Homo sapiens GN=BSG - [BASI_HUMAN]	55.11		10.23	9.09			5.68	14.77	14.77	10.23	10.23	26.14		6.82		9.66	14.2	10.23	10.23	18.18	10.23
P62826	GTP-binding nuclear protein Ran OS=Homo sapiens GN=RAN PE=1 SV=3 - [RAN_HUMAN]	55.09	15.28	4.63	4.63	11.11	14.81	6.02	7.87	12.04		25	14.81	10.19	28.24	5.09	5.09	12.96	8.8	13.43	4.63	15.74
P51114	Fragile X mental retardation syndrome-related protein 1 OS=Homo sapiens GN=FXR1 PE=1 SV=3 - [FXR1_HUMAN]	55.07	3.86	10.95	7.09	13.04	1.61		2.9	4.67	1.61	2.9		2.25	1.29	4.19	6.28	3.38	8.86	2.58	6.12	13.37
F8W8K5	Sorting nexin-12 OS=Homo sapiens GN=SNX12 PE=2 SV=1 - [F8W8K5_HUMAN]	55.06	26.58	6.33	6.33									13.92		13.92		13.92	8.86
Q9UHB9	Signal recognition particle subunit SRP68 OS=Homo sapiens GN=SRP68 PE=1 SV=2 - [SRP68_HUMAN]	55.02	5.42	10.05	7.97	6.22	4.15	10.85	7.81	1.28	2.87	4.63		4.63	5.9	7.66	4.31	1.59	1.91	7.18	11.96	15.15
P35613-2	Isoform 2 of Basigin OS=Homo sapiens GN=BSG - [BASI_HUMAN]	55.02		11.9	17.47	18.22	6.69	3.72	9.67	9.67	6.69	6.69	12.64				11.52	9.29	11.9	11.9	17.1	11.9
P58107	Epiplakin OS=Homo sapiens GN=EPPK1 PE=1 SV=2 - [EPIPL_HUMAN]	55.01	4.6	10.16	12.77	10.04	6.25	6.62	6.78	5.76	1.18	3.03	9.19	7.52	10.1	5.38	5.91	8.47	4.62	6.37	8.45	9.39
Q92900-2	Isoform 2 of Regulator of nonsense transcripts 1 OS=Homo sapiens GN=UPF1 - [RENT1_HUMAN]	55.01	8.05	2.42	1.97	2.86	4.29	6.44	4.65	4.38	6.98	8.77	4.38	3.4	2.5	5.01	5.19	3.85		6.08	5.81	3.94
Q9BTV4	Transmembrane protein 43 OS=Homo sapiens GN=TMEM43 PE=1 SV=1 - [TMM43_HUMAN]	55	8	10.25	12.25				2	4.75	12.5	9	2.5	5.5	7.5	5.5	4	2.5		8.25	10.75	3
Q16822	Phosphoenolpyruvate carboxykinase [GTP], mitochondrial OS=Homo sapiens GN=PCK2 PE=1 SV=3 - [PCKGM_HUMAN]	55	1.25	5	1.56	3.13	3.13	9.53	11.88	10	8.75	2.66	5.63	1.25	5.31	3.91	2.03	9.84	4.84	7.34	11.25	5.63
P39748	Flap endonuclease 1 OS=Homo sapiens GN=FEN1 PE=1 SV=1 - [FEN1_HUMAN]	55		7.11	7.37	8.42	2.89	11.32	4.21	8.68			1.58	4.21	12.11	4.21	12.89	19.21	13.16	5.26	5.53	5.26
O60664-2	Isoform 2 of Perilipin-3 OS=Homo sapiens GN=PLIN3 - [PLIN3_HUMAN]	54.98	7.17	6.77	7.17	7.17	7.17					4.78		14.34		6.77	20.72	23.51	20.72	17.93		6.77
P62277	40S ribosomal protein S13 OS=Homo sapiens GN=RPS13 PE=1 SV=2 - [RS13_HUMAN]	54.97		6.62		9.93	9.93	14.57	15.89	14.57	13.25	11.26	5.3	12.58	6.62	22.52	8.61	8.61	13.25	21.19	22.52	8.61
Q9BXW7-2	Isoform 1 of Cat eye syndrome critical region protein 5 OS=Homo sapiens GN=CECR5 - [CECR5_HUMAN]	54.96	3.31	8.91	7.89	9.41	7.38	6.11			5.34		2.29		16.79	8.4	3.31		2.04			5.09
P15880	40S ribosomal protein S2 OS=Homo sapiens GN=RPS2 PE=1 SV=2 - [RS2_HUMAN]	54.95	6.14	10.92		3.75	9.9	14.68	12.63	16.38	25.94	7.85	20.48	4.44	20.48	3.75		3.75	11.26	16.04	2.73	5.12
Q8WUM4	Programmed cell death 6-interacting protein OS=Homo sapiens GN=PDCD6IP PE=1 SV=1 - [PDC6I_HUMAN]	54.95	7.49	8.06	2.76	10.94	5.3	3	3.46	2.42	2.65	3.57	2.53	3.34	4.61	4.38	5.18	6.22	5.76	6.11	8.99	8.29
B4DLR8	NAD(P)H dehydrogenase [quinone] 1 OS=Homo sapiens GN=NQO1 PE=2 SV=1 - [B4DLR8_HUMAN]	54.95	3.96	12.87	15.35	20.3	13.86	9.41	8.91	4.46	9.9	16.83	14.36	5.45	27.72	5.94	4.46		3.96	3.96		3.96
Q9UGV2	Protein NDRG3 OS=Homo sapiens GN=NDRG3 PE=1 SV=2 - [NDRG3_HUMAN]	54.93	14.4			4.53	10.93					6.13	4.53	5.07	9.87	4
P31689	DnaJ homolog subfamily A member 1 OS=Homo sapiens GN=DNAJA1 PE=1 SV=2 - [DNJA1_HUMAN]	54.91	7.81	5.79			8.31	6.55		6.3	17.13	1.51	1.51	10.58	3.27	14.86	14.61	5.79	5.54	7.81	7.56
Q99848	Probable rRNA-processing protein EBP2 OS=Homo sapiens GN=EBNA1BP2 PE=1 SV=2 - [EBP2_HUMAN]	54.9	10.46		2.29	2.61	2.61				5.56	2.61	7.19	11.11	15.36	10.13	13.73	8.5	6.21	25.49	3.27
P52565	Rho GDP-dissociation inhibitor 1 OS=Homo sapiens GN=ARHGDIA PE=1 SV=3 - [GDIR1_HUMAN]	54.9		7.35	15.69	15.69		22.55	22.55				3.92		3.92		5.39	5.39	6.86	3.43	7.84	17.16
Q13011	Delta(3,5)-Delta(2,4)-dienoyl-CoA isomerase, mitochondrial OS=Homo sapiens GN=ECH1 PE=1 SV=2 - [ECH1_HUMAN]	54.88	11.89	17.07	9.45		4.57	4.57	4.57		9.45	2.74	7.93	26.83	12.5	16.16	8.23	3.35			3.05	20.12
Q9NR45	Sialic acid synthase OS=Homo sapiens GN=NANS PE=1 SV=2 - [SIAS_HUMAN]	54.87		15.04	3.9	12.26	12.53	7.8	12.81	23.4	16.16	9.19	4.18		11.7	5.85	12.26	16.43	19.78		7.8	14.48
Q99615	DnaJ homolog subfamily C member 7 OS=Homo sapiens GN=DNAJC7 PE=1 SV=2 - [DNJC7_HUMAN]	54.86	4.25	4.86		12.55	15.18	11.34	8.1	14.78	11.54		2.43	1.82	8.7				6.68			2.63
Q9Y3I0	tRNA-splicing ligase RtcB homolog OS=Homo sapiens GN=C22orf28 PE=1 SV=1 - [RTCB_HUMAN]	54.85	7.72	2.38	3.37	2.18	7.92	11.68	12.08	10.5		5.35	7.72	12.48	9.9	12.28	3.37	2.38	10.1	5.15
Q86W42	THO complex subunit 6 homolog OS=Homo sapiens GN=THOC6 PE=1 SV=1 - [THOC6_HUMAN]	54.84	3.23	7.92	3.52	6.16				5.57	2.93	6.16		3.23		7.33	15.54	9.38	4.69		5.57
P04040	Catalase OS=Homo sapiens GN=CAT PE=1 SV=3 - [CATA_HUMAN]	54.84	1.9	2.28	1.52	3.61		4.36			2.85	1.71	14.99	11.2	2.09	10.44	3.98	8.73	2.09		12.33	14.04
Q00536	Cyclin-dependent kinase 16 OS=Homo sapiens GN=CDK16 PE=1 SV=1 - [CDK16_HUMAN]	54.84		8.47	4.64	6.45	4.64		2.22	4.03	3.23	1.61	4.03	7.46	4.84	4.64	3.02	7.46	3.83	2.82		5.85
Q12981	Vesicle transport protein SEC20 OS=Homo sapiens GN=BNIP1 PE=1 SV=3 - [SEC20_HUMAN]	54.82		3.95			4.39		5.26				8.33	3.51	4.82				15.35		4.82	9.21
P61326	Protein mago nashi homolog OS=Homo sapiens GN=MAGOH PE=1 SV=1 - [MGN_HUMAN]	54.79	17.12			10.27	11.64	6.16	4.79					25.34		13.7	13.7			7.53	14.38	5.48
C9J959	Histone-binding protein RBBP7 (Fragment) OS=Homo sapiens GN=RBBP7 PE=2 SV=1 - [C9J959_HUMAN]	54.76									30.95	30.95			30.95				23.81
O75436	Vacuolar protein sorting-associated protein 26A OS=Homo sapiens GN=VPS26A PE=1 SV=2 - [VP26A_HUMAN]	54.74	3.06	9.17		7.03	3.98	5.2	5.2	2.14	9.48	13.15	9.17	9.17		15.29	3.98	3.98				12.84
G3V1X9	Chromobox homolog 5 (HP1 alpha homolog, Drosophila), isoform CRA_a OS=Homo sapiens GN=CBX5 PE=2 SV=1 - [G3V1X9_HUMAN]	54.74	15.26	13.16		4.21			8.42			6.84		15.26	20.53		14.74	13.68	12.63	13.68	14.21
Q96A72	Protein mago nashi homolog 2 OS=Homo sapiens GN=MAGOHB PE=1 SV=1 - [MGN2_HUMAN]	54.73	22.97			10.14	11.49	6.08						25	6.08	13.51	13.51			7.43	14.19
Q9Y5X3	Sorting nexin-5 OS=Homo sapiens GN=SNX5 PE=1 SV=1 - [SNX5_HUMAN]	54.7	5.94		7.92	6.19		7.92	4.7	8.91	6.68			5.45	2.72	4.7	6.44	5.69	7.67	5.94	6.19	3.71
E5RIP7	Inositol monophosphatase 1 (Fragment) OS=Homo sapiens GN=IMPA1 PE=2 SV=1 - [E5RIP7_HUMAN]	54.7					4.42		6.08			14.36	10.5				7.18		4.42		13.81	11.6
H0YJ34	Fermitin family homolog 2 (Fragment) OS=Homo sapiens GN=FERMT2 PE=2 SV=1 - [H0YJ34_HUMAN]	54.69		2.5	2.5			4.06	4.06		12.03	6.41	13.44	3.28	7.03	3.13	2.03	5.78	6.09	7.81	11.41	2.81
B4DP11	Prostaglandin E synthase 3 OS=Homo sapiens GN=PTGES3 PE=2 SV=1 - [B4DP11_HUMAN]	54.68	12.23			8.63	15.11	30.22	10.79	10.79	9.35	33.81	24.46		12.23						5.04
C9J0I9	Nuclear-interacting partner of ALK OS=Homo sapiens GN=ZC3HC1 PE=2 SV=1 - [C9J0I9_HUMAN]	54.68	7.19	1.74	1.74				2.61		6.75			3.27	3.92	17.21	12.2	6.32		7.63
Q13509	Tubulin beta-3 chain OS=Homo sapiens GN=TUBB3 PE=1 SV=2 - [TBB3_HUMAN]	54.67	11.56	16	14.89	12.44	10.44	10.44	13.56	24.67	27.33	20.22	28	12.89	24.44	11.56	15.56	15.78	10.67	22.44	14.44	20.89
P30508	HLA class I histocompatibility antigen, Cw-12 alpha chain OS=Homo sapiens GN=HLA-C PE=2 SV=2 - [1C12_HUMAN]	54.64	13.66	6.83				3.83	9.56	2.73			7.92	8.2	4.37	15.85	8.2	14.75	6.83	3.28	3.28	6.56
P61225	Ras-related protein Rap-2b OS=Homo sapiens GN=RAP2B PE=1 SV=1 - [RAP2B_HUMAN]	54.64		6.56	6.56		6.01	6.01							8.74	8.2	19.67	4.92	14.75	14.75
P27361	Mitogen-activated protein kinase 3 OS=Homo sapiens GN=MAPK3 PE=1 SV=4 - [MK03_HUMAN]	54.62	3.17	12.93	6.86	4.22	4.22	4.22	2.64		2.9	2.37	23.75		3.96	9.5	8.18		2.37		2.11	2.37
Q9Y5M8	Signal recognition particle receptor subunit beta OS=Homo sapiens GN=SRPRB PE=1 SV=3 - [SRPRB_HUMAN]	54.61		4.43			5.9	5.9	9.23	11.81	4.43	14.02	7.75				9.59	8.12	12.92	7.01	18.45	4.43
Q9NUU7	ATP-dependent RNA helicase DDX19A OS=Homo sapiens GN=DDX19A PE=1 SV=1 - [DD19A_HUMAN]	54.6	4.6	6.69	9.21	4.6	4.18	7.74	6.07	8.37	2.3	9.62	12.97	2.09		6.69	4.6	6.9	2.3			3.14
Q9Y263	Phospholipase A-2-activating protein OS=Homo sapiens GN=PLAA PE=1 SV=2 - [PLAP_HUMAN]	54.59	3.52	1.64		2.52	3.4	5.91	4.65	4.78	4.28	0.75	3.52	9.43	2.14	5.79	1.76	2.14	3.65	10.82	5.79	1.64
P16989	DNA-binding protein A OS=Homo sapiens GN=CSDA PE=1 SV=4 - [DBPA_HUMAN]	54.57	17.74	5.11	5.11			9.68	2.15	2.15		16.67	2.69	4.03	12.63	8.6	8.6	7.53	8.87	12.37	7.26	3.23
P46777	60S ribosomal protein L5 OS=Homo sapiens GN=RPL5 PE=1 SV=3 - [RL5_HUMAN]	54.55	18.18	20.88	12.12	12.12	4.71	15.82		5.72	12.12	18.52	13.8	4.38	19.19	13.13	8.42	8.75	5.72		14.48	24.24
P04843	Dolichyl-diphosphooligosaccharide--protein glycosyltransferase subunit 1 OS=Homo sapiens GN=RPN1 PE=1 SV=1 - [RPN1_HUMAN]	54.53	3.79	2.47		4.12	8.9	12.36	8.07	16.31	5.6	5.93	4.78	11.7	4.61	13.34	5.77	7.25	9.39	9.39	6.59	2.47
P49662-2	Isoform 2 of Caspase-4 OS=Homo sapiens GN=CASP4 - [CASP4_HUMAN]	54.52						2.49	6.54	2.8	11.84		4.98	2.8		8.1			3.12		13.71	12.15
Q9Y295	Developmentally-regulated GTP-binding protein 1 OS=Homo sapiens GN=DRG1 PE=1 SV=1 - [DRG1_HUMAN]	54.5	4.63	6.54	7.08		6.54		7.36		2.72			11.44		15.8	6.27	12.53	3.27	3.27	3	4.09
Q68D91	Metallo-beta-lactamase domain-containing protein 2 OS=Homo sapiens GN=MBLAC2 PE=1 SV=3 - [MBLC2_HUMAN]	54.48	3.23		6.09				4.3		9.68		3.58	4.66	7.53		2.51				7.53	12.9
P49366	Deoxyhypusine synthase OS=Homo sapiens GN=DHPS PE=1 SV=1 - [DHYS_HUMAN]	54.47	3.52	9.76			17.34	8.13	6.5	10.03	3.52	3.52	5.69		3.52	7.05					13.55	3.25
Q12788	Transducin beta-like protein 3 OS=Homo sapiens GN=TBL3 PE=1 SV=2 - [TBL3_HUMAN]	54.46	3.84	5.69	3.09		4.08		3.47	1.86	6.31	5.82	6.06	3.59	3.47	1.73	3.34		7.92	4.83	5.57	9.78
Q6P587	Acylpyruvase FAHD1, mitochondrial OS=Homo sapiens GN=FAHD1 PE=1 SV=2 - [FAHD1_HUMAN]	54.46	6.25		7.14		10.27					10.71		6.25					20.09
Q9HBH5	Retinol dehydrogenase 14 OS=Homo sapiens GN=RDH14 PE=1 SV=1 - [RDH14_HUMAN]	54.46		5.95	4.76		10.42			8.04	2.38	5.06	3.57	10.42	3.57	5.06		3.87			5.06
P63279	SUMO-conjugating enzyme UBC9 OS=Homo sapiens GN=UBE2I PE=1 SV=1 - [UBC9_HUMAN]	54.43	8.23				11.39	17.72	13.92	7.59	31.65	15.19	16.46		16.46					16.46
P63010	AP-2 complex subunit beta OS=Homo sapiens GN=AP2B1 PE=1 SV=1 - [AP2B1_HUMAN]	54.43	5.87	5.87	3.42	2.67	7.68	7.26	15.37	8.11	2.88	0.96	5.55	2.99	5.98	4.27	7.79	7.36	4.27	8.11	6.4	6.83
Q15005	Signal peptidase complex subunit 2 OS=Homo sapiens GN=SPCS2 PE=1 SV=3 - [SPCS2_HUMAN]	54.42		3.98	8.41			3.98		4.42						16.37	3.1	21.24	20.8	3.54	8.41	12.39
P62701	40S ribosomal protein S4, X isoform OS=Homo sapiens GN=RPS4X PE=1 SV=2 - [RS4X_HUMAN]	54.37	7.98	6.84	6.84	18.63	21.67	8.75	18.25	19.01	23.57	25.1	6.46	9.51	4.94	10.65	14.07	16.35	12.55		2.66	9.51
Q5R3I4	Tetratricopeptide repeat protein 38 OS=Homo sapiens GN=TTC38 PE=1 SV=1 - [TTC38_HUMAN]	54.37		4.26	5.97	5.97	8.74	1.92	6.61	2.35	7.46	4.26			2.35			2.56	4.26	6.4
Q92783-2	Isoform 2 of Signal transducing adapter molecule 1 OS=Homo sapiens GN=STAM - [STAM1_HUMAN]	54.34	10.42			6.7	6.7	3.47	4.47	6.2	4.96	3.23	7.69		2.73	2.73	2.98	3.97
K7ES61	39S ribosomal protein L4, mitochondrial (Fragment) OS=Homo sapiens GN=MRPL4 PE=3 SV=1 - [K7ES61_HUMAN]	54.33		12.33	9.67	9.67			5.33	5.33	8		6.33		10		5.67	5.67			3.33	4
Q86X76-2	Isoform 1 of Nitrilase homolog 1 OS=Homo sapiens GN=NIT1 - [NIT1_HUMAN]	54.3	8.59	2.41						3.78	6.19	2.75	4.81	18.21	12.37	5.15	5.15	4.47			3.44
Q13643	Four and a half LIM domains protein 3 OS=Homo sapiens GN=FHL3 PE=1 SV=4 - [FHL3_HUMAN]	54.29	16.79		3.57	2.86							2.5	12.5				9.64		3.57	6.07	9.29
Q9BTL3	RNMT-activating mini protein OS=Homo sapiens GN=FAM103A1 PE=1 SV=1 - [RAM_HUMAN]	54.24	11.02	6.78									6.78	11.02				8.47			12.71	27.97
Q14353	Guanidinoacetate N-methyltransferase OS=Homo sapiens GN=GAMT PE=1 SV=1 - [GAMT_HUMAN]	54.24	6.78		5.93	8.9	8.9	3.81		14.41				6.78	6.78					14.41
P83876	Thioredoxin-like protein 4A OS=Homo sapiens GN=TXNL4A PE=1 SV=1 - [TXN4A_HUMAN]	54.23	7.75	9.15		16.2	4.93	4.93			8.45				7.75				16.2	7.75
Q16762	Thiosulfate sulfurtransferase OS=Homo sapiens GN=TST PE=1 SV=4 - [THTR_HUMAN]	54.21		2.36	6.4	14.48	4.38	10.44	10.1	12.46	4.38		7.07	6.06	4.71	13.47		4.04		2.69
Q8N6T3	ADP-ribosylation factor GTPase-activating protein 1 OS=Homo sapiens GN=ARFGAP1 PE=1 SV=2 - [ARFG1_HUMAN]	54.19	2.96			6.16	4.19	2.22	3.69	12.07	4.68	4.93	7.39	1.97	13.79		13.55	10.34		1.97	3.94	2.46
P40261	Nicotinamide N-methyltransferase OS=Homo sapiens GN=NNMT PE=1 SV=1 - [NNMT_HUMAN]	54.17	9.85	8.33					9.85		10.23	3.03	6.06	10.61	11.36	6.82		9.09	7.95	7.95		8.33
P41223	Protein BUD31 homolog OS=Homo sapiens GN=BUD31 PE=1 SV=2 - [BUD31_HUMAN]	54.17		13.19	13.19	20.83	20.83	20.83					5.56							7.64	6.94	6.25
Q9P0J0	NADH dehydrogenase [ubiquinone] 1 alpha subcomplex subunit 13 OS=Homo sapiens GN=NDUFA13 PE=1 SV=3 - [NDUAD_HUMAN]	54.17			11.81	21.53			6.94								25	9.03				6.94
K7EQ06	Hepatoma-derived growth factor-related protein 2 (Fragment) OS=Homo sapiens GN=HDGFRP2 PE=4 SV=1 - [K7EQ06_HUMAN]	54.17														54.17
Q99436	Proteasome subunit beta type-7 OS=Homo sapiens GN=PSMB7 PE=1 SV=1 - [PSB7_HUMAN]	54.15	3.97		3.97	3.25	8.3	11.91	10.47	6.86				11.19		31.41	24.19		3.61	3.61		14.08
P48059	LIM and senescent cell antigen-like-containing domain protein 1 OS=Homo sapiens GN=LIMS1 PE=1 SV=4 - [LIMS1_HUMAN]	54.15		2.15		9.85	3.69	3.38	3.38	10.15	4.92	9.54		3.69			8.62	3.69	3.69	3.08
D3YTB1	60S ribosomal protein L32 (Fragment) OS=Homo sapiens GN=RPL32 PE=2 SV=1 - [D3YTB1_HUMAN]	54.14	9.77			12.78	18.05	22.56	5.26	31.58	26.32	18.8	16.54	9.77	11.28	17.29	17.29	7.52	17.29	5.26	21.8	12.03
B4DR80	Serine/threonine-protein kinase 24 12 kDa subunit OS=Homo sapiens GN=STK24 PE=2 SV=1 - [B4DR80_HUMAN]	54.13		3.88	7.52		2.18	11.89	10.19	7.04	4.61	3.88	4.61	9.71	8.74	6.31	2.67	5.83		3.88	2.43
F8W0K0	Eukaryotic translation initiation factor 4B (Fragment) OS=Homo sapiens GN=EIF4B PE=2 SV=1 - [F8W0K0_HUMAN]	54.12	7.06		5.88	5.88	12.35	12.35	8.24	8.24	8.24	16.47	8.24	7.06	10			4.71	4.71	4.71	4.71	4.71
P16455	Methylated-DNA--protein-cysteine methyltransferase OS=Homo sapiens GN=MGMT PE=1 SV=1 - [MGMT_HUMAN]	54.11	3.86	8.7				4.83								5.8	5.8	13.04	6.76	13.04	8.7
P61081	NEDD8-conjugating enzyme Ubc12 OS=Homo sapiens GN=UBE2M PE=1 SV=1 - [UBC12_HUMAN]	54.1	14.75	14.75	6.01	6.01	6.01	18.03	6.01		6.01	4.37	13.11	10.93	8.74				4.92	13.66	4.92	14.75
P09417	Dihydropteridine reductase OS=Homo sapiens GN=QDPR PE=1 SV=2 - [DHPR_HUMAN]	54.1				2.87	6.97	12.3	5.33					4.1		4.1	7.38	30.33		4.51
E7EPL4	Pyridoxal-dependent decarboxylase domain-containing protein 1 OS=Homo sapiens GN=PDXDC1 PE=2 SV=1 - [E7EPL4_HUMAN]	54.08		9.47	5.13	5.26	4.08	5.92	5.39	1.71	8.16	1.84	2.11		2.11	2.11		5.26	13.95	4.87	6.58	2.5
Q9BQP7	Mitochondrial genome maintenance exonuclease 1 OS=Homo sapiens GN=MGME1 PE=1 SV=1 - [MGME1_HUMAN]	54.07	11.05		3.78		3.49	5.52	11.63	3.2	4.07	4.65	6.4				12.21		3.2
P61158	Actin-related protein 3 OS=Homo sapiens GN=ACTR3 PE=1 SV=3 - [ARP3_HUMAN]	54.07	6.7	11.24	3.83	3.83	18.18	26.79	19.62	16.99	9.33	6.7		1.91	4.31	2.39	4.78	6.94	6.94		7.66	5.02
Q9UJ70	N-acetyl-D-glucosamine kinase OS=Homo sapiens GN=NAGK PE=1 SV=4 - [NAGK_HUMAN]	54.07	4.94					5.52			6.4	7.27	9.88	8.72		6.1	5.81	10.47	3.2	3.2
P62714	Serine/threonine-protein phosphatase 2A catalytic subunit beta isoform OS=Homo sapiens GN=PPP2CB PE=1 SV=1 - [PP2AB_HUMAN]	54.05	7.12	4.21	6.8	6.8	9.71	4.85	4.85				11.65	11.33	3.56	11.65	9.71	4.85	2.59	6.15		11.65
Q9Y617	Phosphoserine aminotransferase OS=Homo sapiens GN=PSAT1 PE=1 SV=2 - [SERC_HUMAN]	54.05	17.84	5.14	11.35	8.65	10.54	6.76	9.19	5.41	20.54	14.86	11.35	8.38	20.27	8.65	5.68	2.7	2.7	2.7	11.08	12.7
O15498	Synaptobrevin homolog YKT6 OS=Homo sapiens GN=YKT6 PE=1 SV=1 - [YKT6_HUMAN]	54.04		6.57	5.56			5.05		7.58			11.11	8.59	6.57	8.59			4.55		8.59	6.57
B4DQ48	Eukaryotic translation initiation factor 3 subunit K OS=Homo sapiens GN=EIF3K PE=2 SV=1 - [B4DQ48_HUMAN]	54.03		12.1									29.03		18.55			12.9
Q9Y3B8	Oligoribonuclease, mitochondrial OS=Homo sapiens GN=REXO2 PE=1 SV=3 - [ORN_HUMAN]	54.01	4.22			10.97	16.03	20.25	12.66	11.39		5.06	5.06							3.38	3.38
Q14683	Structural maintenance of chromosomes protein 1A OS=Homo sapiens GN=SMC1A PE=1 SV=2 - [SMC1A_HUMAN]	54.01	7.06	3.97	4.79	5.68	3.16	4.14	1.7	3.33	2.76	3.49	7.38	3.16	6.08	3.08	4.38	5.35	4.95	3.16	8.92	3.57
Q9H4A4	Aminopeptidase B OS=Homo sapiens GN=RNPEP PE=1 SV=2 - [AMPB_HUMAN]	54	6.46	9.23	4.92		1.85	8.15	2	8.15	5.23	3.85	6	7.69	12.15	12.46	6.92	6.92	3.08	4.15	10	14.62
O94888	UBX domain-containing protein 7 OS=Homo sapiens GN=UBXN7 PE=1 SV=2 - [UBXN7_HUMAN]	53.99	7.57	1.64				8.59	8.59	2.04	6.54	5.93			2.66	6.54	9	1.84	10.63	4.29	1.84	1.84
P62333	26S protease regulatory subunit 10B OS=Homo sapiens GN=PSMC6 PE=1 SV=1 - [PRS10_HUMAN]	53.98	9.77	3.86			7.71	12.6			4.37	3.08	3.08	4.37	10.8	12.08	12.08	3.6	14.14	11.05	8.23	3.86
B4DEK4	Sorting nexin-2 OS=Homo sapiens GN=SNX2 PE=2 SV=1 - [B4DEK4_HUMAN]	53.98	3.48				1.99	4.73	5.22	8.96				5.97	6.47	2.49	6.47	6.97		2.74	10.2	7.21
Q9BU89	Deoxyhypusine hydroxylase OS=Homo sapiens GN=DOHH PE=1 SV=1 - [DOHH_HUMAN]	53.97	4.3	4.3			5.96			7.62		6.62	10.6	4.3			9.6				5.3	10.6
P54578	Ubiquitin carboxyl-terminal hydrolase 14 OS=Homo sapiens GN=USP14 PE=1 SV=3 - [UBP14_HUMAN]	53.85	10.93	5.47	7.89	5.06	9.11	3.64	11.74	11.74	6.48	5.87	5.87	4.05	12.55	1.62	6.28	6.28	12.35	1.62	3.04	6.28
P39023	60S ribosomal protein L3 OS=Homo sapiens GN=RPL3 PE=1 SV=2 - [RL3_HUMAN]	53.85	10.42		3.97		1.74	1.74	4.96	6.95	17.62	6.2	6.2	10.17	8.44	13.65	17.87	20.84	14.39	10.67	9.93	1.99
P08237	6-phosphofructokinase, muscle type OS=Homo sapiens GN=PFKM PE=1 SV=2 - [K6PF_HUMAN]	53.85	2.95	11.41	1.41	11.41	10.26	7.69	8.72	8.59	7.18	9.87		2.44	3.33			2.95	7.82	1.15	3.85	8.85
K7EJB9	Calreticulin (Fragment) OS=Homo sapiens GN=CALR PE=3 SV=1 - [K7EJB9_HUMAN]	53.85	8.1	18.62	8.91	22.67	18.62	22.27	23.08	19.43			4.86	17.81	17.81	9.72	9.72	20.24	10.12	24.29	27.53	14.98
J3QKU3	Epithelial-splicing regulatory protein 2 (Fragment) OS=Homo sapiens GN=ESRP2 PE=4 SV=1 - [J3QKU3_HUMAN]	53.85						20		16.92							16.92
F8VPD4	CAD protein OS=Homo sapiens GN=CAD PE=2 SV=1 - [F8VPD4_HUMAN]	53.84	2.82	4.95	2.41	1.39	3.47	3.1	5.83	6.2	8.83	6.01	2.04	1.57	1.39	11.15	7.49	5.04	7.59	6.57	10.55	8.65
K7EKI8	Periplakin OS=Homo sapiens GN=PPL PE=4 SV=1 - [K7EKI8_HUMAN]	53.82	4.5	4.16	1.82	2.68	1.82	3.42	5.07	4.22	3.25	3.82	3.88	4.22	1.88	5.42	6.9	4.33	4.85	3.25	4.22	5.59
Q96AC1	Fermitin family homolog 2 OS=Homo sapiens GN=FERMT2 PE=1 SV=1 - [FERM2_HUMAN]	53.82		2.35	2.35		1.91	5.74	2.5		11.32	6.03	12.65	3.09	6.62	4.56	1.91	5.44	5.74	7.35	12.5	2.65
B4DIT7	Protein-glutamine gamma-glutamyltransferase 2 OS=Homo sapiens GN=TGM2 PE=2 SV=1 - [B4DIT7_HUMAN]	53.8	10.89	5.94		5.61	3.96	4.62	1.49	5.61	5.94	2.15		10.07	5.12		9.41	7.59	5.78	4.46	6.93	5.61
P54727	UV excision repair protein RAD23 homolog B OS=Homo sapiens GN=RAD23B PE=1 SV=1 - [RD23B_HUMAN]	53.79		9.78	4.65	4.65	14.18	11.49			4.65	15.89	5.38		10.02		4.4	6.6	7.09	17.36	13.94	10.27
P62495	Eukaryotic peptide chain release factor subunit 1 OS=Homo sapiens GN=ETF1 PE=1 SV=3 - [ERF1_HUMAN]	53.78	14.87	9.84	5.49	5.03		9.38	6.41	18.31	5.49	17.39	3.43	12.36	15.79	9.61	12.81	12.36	7.32	5.72	6.64	7.32
H0YGJ7	Eukaryotic translation initiation factor 3 subunit J (Fragment) OS=Homo sapiens GN=EIF3J PE=4 SV=1 - [H0YGJ7_HUMAN]	53.77					12.26	23.58	11.32										18.87	30.19	18.87
B4DXW4	Caseinolytic peptidase B protein homolog OS=Homo sapiens GN=CLPB PE=2 SV=1 - [B4DXW4_HUMAN]	53.75			2.37		3.36	4.15	4.35	5.93	4.55	9.68	10.87	1.38	5.73	3.75	4.74	4.94	7.11	6.72	2.57	2.57
O95817	BAG family molecular chaperone regulator 3 OS=Homo sapiens GN=BAG3 PE=1 SV=3 - [BAG3_HUMAN]	53.74	4.7	2.96	2.09	8.35	5.74	6.96	6.96	4	2.61	10.78	6.61	4.87	3.3	1.74	1.74	2.43		4.52	2.09	5.04
K7ER90	Eukaryotic translation initiation factor 3 subunit G (Fragment) OS=Homo sapiens GN=EIF3G PE=3 SV=1 - [K7ER90_HUMAN]	53.74	12.78	9.25	5.29	14.54	10.13								10.13		11.45	19.82		16.3	14.54	12.33
O00232	26S proteasome non-ATPase regulatory subunit 12 OS=Homo sapiens GN=PSMD12 PE=1 SV=3 - [PSD12_HUMAN]	53.73	9.65	6.58		4.17	8.11	10.96	1.97	3.07	12.06	11.4	12.5	4.61	11.18	4.61	5.92	8.11	10.09	6.14	4.17	3.73
Q15008	26S proteasome non-ATPase regulatory subunit 6 OS=Homo sapiens GN=PSMD6 PE=1 SV=1 - [PSMD6_HUMAN]	53.73	7.46	6.68	7.46	7.71	9.77		3.08	8.74	13.62	8.48	3.08	7.2	3.34	5.91	8.23	6.17	3.86	5.66	11.05	7.46
J3QKT4	Pyrroline-5-carboxylate reductase (Fragment) OS=Homo sapiens GN=PYCR1 PE=3 SV=1 - [J3QKT4_HUMAN]	53.72		4.55		7.02	7.02		5.37		14.88	21.07	8.68		4.55	11.98	9.09	3.72	4.13	9.92	11.98
Q96PZ0	Pseudouridylate synthase 7 homolog OS=Homo sapiens GN=PUS7 PE=1 SV=2 - [PUS7_HUMAN]	53.71	6.96		1.97	2.12	7.87	3.18	3.33	1.66	8.32			15.43	3.33		2.12	4.08	5.3	4.39	4.39	3.33
F5H6I6	Cullin-associated NEDD8-dissociated protein 1 (Fragment) OS=Homo sapiens GN=CAND1 PE=2 SV=1 - [F5H6I6_HUMAN]	53.7									18.52										20.37	14.81
Q8NC51-3	Isoform 3 of Plasminogen activator inhibitor 1 RNA-binding protein OS=Homo sapiens GN=SERBP1 - [PAIRB_HUMAN]	53.69	24.43	16.54	7.89			3.05	13.49	13.99	12.21	11.45	7.12	7.63	10.94	16.03	11.45	7.38	15.01	24.94	18.32	8.4
P05141	ADP/ATP translocase 2 OS=Homo sapiens GN=SLC25A5 PE=1 SV=7 - [ADT2_HUMAN]	53.69	13.42	16.44	16.44	14.09	18.12	17.11	13.76	12.42	16.44	10.07	12.75	11.41	25.17	13.76	13.42	23.49	16.44	28.19	26.51	19.8
P14625	Endoplasmin OS=Homo sapiens GN=HSP90B1 PE=1 SV=1 - [ENPL_HUMAN]	53.67	12.2	2.74	5.48	5.85	8.97	9.22	11.46	11.46	15.82	13.45	13.95	14.57	11.08	8.47	12.45	7.47	11.58	19.43	13.95	8.84
Q8TED0	U3 small nucleolar RNA-associated protein 15 homolog OS=Homo sapiens GN=UTP15 PE=1 SV=3 - [UTP15_HUMAN]	53.67	6.18	2.32		4.83	9.65	5.21	7.53	3.67	1.35	6.56	6.56	6.18	6.18	4.63	4.05	4.05	2.32	3.47	5.6	2.51
H0YN26	Acidic leucine-rich nuclear phosphoprotein 32 family member A OS=Homo sapiens GN=ANP32A PE=2 SV=1 - [H0YN26_HUMAN]	53.67		14.69	21.47	6.78	15.82	33.9	35.03	19.21	15.25	7.34	7.34		13.56	9.04	6.21	15.25	21.47	15.25	6.21	10.17
O60256	Phosphoribosyl pyrophosphate synthase-associated protein 2 OS=Homo sapiens GN=PRPSAP2 PE=1 SV=1 - [KPRB_HUMAN]	53.66	3.79			7.32	14.91	11.38	7.05				3.79	7.32	10.57	3.79		5.69	5.69	4.61	6.78	8.67
H7C3P7	Ras-related protein Ral-A (Fragment) OS=Homo sapiens GN=RALA PE=4 SV=1 - [H7C3P7_HUMAN]	53.66		9.76			15.85		6.71							9.15		8.54		12.2
P51809	Vesicle-associated membrane protein 7 OS=Homo sapiens GN=VAMP7 PE=1 SV=3 - [VAMP7_HUMAN]	53.64	18.18	3.64			8.64	14.09	5.45	3.18				20	5.91	17.73				5.45
Q14203-3	Isoform 3 of Dynactin subunit 1 OS=Homo sapiens GN=DCTN1 - [DCTN1_HUMAN]	53.64	4.69	3.96	2.59	5.1	0.97	3.07	4.13	3.4	2.18	3.4	7.36	4.61	2.67	5.99	7.36	2.51	2.59	7.52	8.33	6.88
Q15056	Eukaryotic translation initiation factor 4H OS=Homo sapiens GN=EIF4H PE=1 SV=5 - [IF4H_HUMAN]	53.63	3.23		8.87	14.11	9.27		2.82			14.92	3.23	5.65		8.87	3.63	6.45				5.65
P48444	Coatomer subunit delta OS=Homo sapiens GN=ARCN1 PE=1 SV=1 - [COPD_HUMAN]	53.62	4.31	2.54	4.5	2.35	2.35	9.2	9.39	19.18	6.46	6.46	7.05	3.72	13.31	3.52	8.41	6.65	3.91	14.48	13.7	7.44
H7BXI1	Extended synaptotagmin-2 (Fragment) OS=Homo sapiens GN=ESYT2 PE=2 SV=1 - [H7BXI1_HUMAN]	53.62	1.36	1.92	2.83	6.11	3.28	6.11	4.41	1.92	9.16	4.98		4.75	3.85	1.92	7.47	8.82	5.88	11.43	7.92	3.73
B4DQJ8	6-phosphogluconate dehydrogenase, decarboxylating OS=Homo sapiens GN=PGD PE=2 SV=1 - [B4DQJ8_HUMAN]	53.62	12.13	11.7	6.6	2.98	3.62	6.17	6.81	13.4	12.77	10.43	3.62	6.81	19.57		12.13	12.13	7.66	5.53	3.62	12.34
Q96EE3	Nucleoporin SEH1 OS=Homo sapiens GN=SEH1L PE=1 SV=3 - [SEH1_HUMAN]	53.61	3.61	5	6.94					5.56	3.89	4.72	4.44		5.28	3.61	4.17	5.56	6.67	9.17	5.56	2.22
Q9C0C2	182 kDa tankyrase-1-binding protein OS=Homo sapiens GN=TNKS1BP1 PE=1 SV=4 - [TB182_HUMAN]	53.61	6.88	3.35	4.86	3.93	0.93	1.62	1.56	1.21	6.88	6.94	6.88	1.62	4.4	3.7	6.36	4.45	4.11	6.82	6.36	9.14
Q9BPX5	Actin-related protein 2/3 complex subunit 5-like protein OS=Homo sapiens GN=ARPC5L PE=1 SV=1 - [ARP5L_HUMAN]	53.59		7.84										7.19	7.84	24.84		8.5	12.42	20.26	7.84	7.84
Q9Y5B9	FACT complex subunit SPT16 OS=Homo sapiens GN=SUPT16H PE=1 SV=1 - [SP16H_HUMAN]	53.58	5.83	5.06	2.39	3.06	6.69	7.07	6.3	8.6	5.92	5.06	5.64	5.44	5.35	3.72	2.96	4.87	4.11	4.2	7.64	4.01
Q96JM3	Chromosome alignment-maintaining phosphoprotein 1 OS=Homo sapiens GN=CHAMP1 PE=1 SV=2 - [CHAP1_HUMAN]	53.57	4.8	2.22	1.11	2.46	3.69	8.99	4.56	7.64	3.82	2.09	2.71	1.35	1.35	5.3	1.23	2.46	7.88	5.54		4.06
Q9UKD2	mRNA turnover protein 4 homolog OS=Homo sapiens GN=MRTO4 PE=1 SV=2 - [MRT4_HUMAN]	53.56			3.77		4.18	4.18	24.27	6.28	6.28	23.85		8.79			8.79	5.44	10.04	7.95	7.95	3.35
Q9NR50	Translation initiation factor eIF-2B subunit gamma OS=Homo sapiens GN=EIF2B3 PE=1 SV=1 - [EI2BG_HUMAN]	53.54	6.19	5.53		7.96		6.64	1.99			2.21	3.1	8.41				6.19	9.51	5.75	5.09	5.53
Q9Y285	Phenylalanine--tRNA ligase alpha subunit OS=Homo sapiens GN=FARSA PE=1 SV=3 - [SYFA_HUMAN]	53.54	2.17		3.74	7.28	11.22	18.11	14.96	11.81	5.91	12.6	2.95	8.86	8.07	8.86	4.33	4.72	5.51	5.51	5.51
P49736	DNA replication licensing factor MCM2 OS=Homo sapiens GN=MCM2 PE=1 SV=4 - [MCM2_HUMAN]	53.54	7.08	3.21	4.09	2.65	3.1	1.22	2.88	6.08	2.99		5.31	7.3	11.84	9.29	6.19	6.42	8.41	6.08	2.77	6.31
O75534	Cold shock domain-containing protein E1 OS=Homo sapiens GN=CSDE1 PE=1 SV=2 - [CSDE1_HUMAN]	53.51	9.52	1.13	3.38	2.76	1.75	1	1.5	6.89	7.27	5.26	2.38	8.65	3.76	6.14	6.27	3.88	6.27	2.63	6.39	1.13
P41252	Isoleucine--tRNA ligase, cytoplasmic OS=Homo sapiens GN=IARS PE=1 SV=2 - [SYIC_HUMAN]	53.49	7.37	6.5	6.97	5.78	2.69	8.16	4.91	7.45	7.53	6.66	5.78	5.63	5.39	7.69	2.69	1.82	1.27	7.29	6.26	8.48
H0Y586	Proteasome subunit alpha type-7 (Fragment) OS=Homo sapiens GN=PSMA7 PE=4 SV=1 - [H0Y586_HUMAN]	53.48	14.97	8.02		7.49	7.49	7.49	17.65		4.81	4.81		14.97	8.02	11.76				8.56	8.02	8.02
H0YKH1	Pre-B-cell leukemia transcription factor 1 (Fragment) OS=Homo sapiens GN=PBX1 PE=2 SV=1 - [H0YKH1_HUMAN]	53.46		8.18	9.43	9.43							18.24		6.92			10.69
O00625	Pirin OS=Homo sapiens GN=PIR PE=1 SV=1 - [PIR_HUMAN]	53.45			5.52	8.62	8.62				8.62	12.41	7.93		11.38	3.1				3.1	4.48
P27694	Replication protein A 70 kDa DNA-binding subunit OS=Homo sapiens GN=RPA1 PE=1 SV=2 - [RFA1_HUMAN]	53.41	8.44	6.49		1.79	6.33	8.12	3.73	3.73	6.17	2.76	2.76	5.03	12.99	6.66	5.84	5.19	6.17	4.06	2.44	4.06
P45974-2	Isoform Short of Ubiquitin carboxyl-terminal hydrolase 5 OS=Homo sapiens GN=USP5 - [UBP5_HUMAN]	53.41	4.31	1.44	1.32	5.51	1.44		2.16	11.62	6.71	5.99	1.32	6.11	2.4	6.59	7.54	5.15	2.16	8.62	6.11	2.75
Q9H4M9	EH domain-containing protein 1 OS=Homo sapiens GN=EHD1 PE=1 SV=2 - [EHD1_HUMAN]	53.37	4.68	6.74	4.31	3.93	2.25	5.99	2.25	2.25	1.12	4.49	3.56	7.87	2.06	5.99	7.49	5.24	10.3	5.06	5.24	8.05
P20674	Cytochrome c oxidase subunit 5A, mitochondrial OS=Homo sapiens GN=COX5A PE=1 SV=2 - [COX5A_HUMAN]	53.33	16								16	6	6		20	4	4	20.67	14	10.67
Q96IU4	Alpha/beta hydrolase domain-containing protein 14B OS=Homo sapiens GN=ABHD14B PE=1 SV=1 - [ABHEB_HUMAN]	53.33	10	4.76					6.19	6.19	4.76	4.76		3.33	4.76	12.38		10.48	10.48
Q9BY77-2	Isoform 2 of Polymerase delta-interacting protein 3 OS=Homo sapiens GN=POLDIP3 - [PDIP3_HUMAN]	53.32	3.32	4.08			6.63	11.22	2.04		3.32		3.57	5.61		2.3	8.16	4.85	12.5	9.69	4.34
P12268	Inosine-5'-monophosphate dehydrogenase 2 OS=Homo sapiens GN=IMPDH2 PE=1 SV=2 - [IMDH2_HUMAN]	53.31	18.29	5.25	8.95			7.39	15.37	20.82	11.48	6.23	4.86	17.7	17.32	14.4	20.82	21.01	13.23	16.34	8.75	1.56
Q9NSD9	Phenylalanine--tRNA ligase beta subunit OS=Homo sapiens GN=FARSB PE=1 SV=3 - [SYFB_HUMAN]	53.31	7.47	4.75	1.19	9.17	1.87	11.21	7.81	7.47	3.06	3.06	6.62	5.94	13.92	4.41	5.77	6.45	6.79	6.45	1.53	4.75
A0FGR8-2	Isoform 2 of Extended synaptotagmin-2 OS=Homo sapiens GN=ESYT2 - [ESYT2_HUMAN]	53.3	1.34	1.9	2.8	6.05	3.25	4.37	4.37	1.9	7.28	4.93		6.72	3.81	1.9	7.39	8.73	5.82	11.31	7.84	3.7
Q9H2U2	Inorganic pyrophosphatase 2, mitochondrial OS=Homo sapiens GN=PPA2 PE=1 SV=2 - [IPYR2_HUMAN]	53.29	2.69	6.29		2.4	11.38	9.88	4.79	18.26	9.88	13.17	5.69	2.69		2.69	10.48		3.59	9.28	3.29	9.58
P61088	Ubiquitin-conjugating enzyme E2 N OS=Homo sapiens GN=UBE2N PE=1 SV=1 - [UBE2N_HUMAN]	53.29			6.58				5.92	4.61	4.61	4.61	17.76	17.76	13.16	5.26	7.24				16.45	16.45
C9J6B1	Ras-related protein Ral-B (Fragment) OS=Homo sapiens GN=RALB PE=2 SV=1 - [C9J6B1_HUMAN]	53.29					15.57		6.59				8.38		8.38			9.58	9.58	11.98
Q9P258	Protein RCC2 OS=Homo sapiens GN=RCC2 PE=1 SV=2 - [RCC2_HUMAN]	53.26	17.05	10.92	3.64	11.11	11.3	19.92	17.82	9	7.85	5.36	8.24	10.73	12.64	9.2	9.77	5.17	3.07	10.34	1.34	3.64
Q04917	14-3-3 protein eta OS=Homo sapiens GN=YWHAH PE=1 SV=4 - [1433F_HUMAN]	53.25	6.91	7.32	15.45	11.38	6.91	3.25	12.2	22.36	8.13	7.32	4.07	14.63	7.32	4.07	10.16	10.16	10.16	4.07	4.07
Q5U8S2	Syntaxin 10 OS=Homo sapiens GN=STX10 PE=2 SV=1 - [Q5U8S2_HUMAN]	53.25		4.07	4.47		3.66				6.5	6.5		12.6			4.47	19.92	5.69		15.45	4.07
Q14498-2	Isoform 2 of RNA-binding protein 39 OS=Homo sapiens GN=RBM39 - [RBM39_HUMAN]	53.24	4.77	5.73	1.91	6.11	3.24		6.3	8.59	19.27	6.87	2.1	5.73	2.67	3.05	5.92	6.68	2.86	6.49	6.3	1.91
Q9UNI6	Dual specificity protein phosphatase 12 OS=Homo sapiens GN=DUSP12 PE=1 SV=1 - [DUS12_HUMAN]	53.24		3.24	2.65		2.94	11.18	3.24		18.53	5.59			2.94	5			3.53	3.53
P36578	60S ribosomal protein L4 OS=Homo sapiens GN=RPL4 PE=1 SV=5 - [RL4_HUMAN]	53.16	9.84	12.88	13.82	11.71	12.65	10.54	5.15	6.09	17.8	14.99	14.75	2.11	14.75	9.13	5.62	4.45	10.07	4.68	12.88	12.88
P61006	Ras-related protein Rab-8A OS=Homo sapiens GN=RAB8A PE=1 SV=1 - [RAB8A_HUMAN]	53.14	14.98	5.31			7.25				12.56	18.84	5.31		14.01	15.94	3.86		3.86	8.7	12.08	5.31
P32754-2	Isoform 2 of 4-hydroxyphenylpyruvate dioxygenase OS=Homo sapiens GN=HPD - [HPPD_HUMAN]	53.11		12.43	4.8			3.11		2.26		2.82	6.78	3.39	7.91	7.06	3.39	8.19		6.78	2.54	7.34
B7Z9S8	Sodium/potassium-transporting ATPase subunit beta-1 OS=Homo sapiens GN=ATP1B1 PE=2 SV=1 - [B7Z9S8_HUMAN]	53.04						3.64	4.45			13.77	11.34	6.48		12.55	9.31			5.26	19.43	19.43
P17174	Aspartate aminotransferase, cytoplasmic OS=Homo sapiens GN=GOT1 PE=1 SV=3 - [AATC_HUMAN]	53.03	4.6	11.38	7.26	6.3		3.63	10.65	8.47			5.08	4.6	18.64	5.57	2.18	4.36	8.47	5.08	5.08	2.18
Q9UKG1	DCC-interacting protein 13-alpha OS=Homo sapiens GN=APPL1 PE=1 SV=1 - [DP13A_HUMAN]	53.03	2.4	5.36	5.92	7.48	3.95		2.96	2.96	1.41	1.97	10.16	4.51	6.63	1.55	5.78	2.26		8.04	6.35	5.36
Q9Y262	Eukaryotic translation initiation factor 3 subunit L OS=Homo sapiens GN=EIF3L PE=1 SV=1 - [EIF3L_HUMAN]	53.01	2.84	2.84	1.24	3.55	2.3	7.27	2.66	2.66	9.22	10.82	14.18	10.99	5.14	10.46	8.33	4.61	1.6	1.6	1.6	4.43
Q15836	Vesicle-associated membrane protein 3 OS=Homo sapiens GN=VAMP3 PE=1 SV=3 - [VAMP3_HUMAN]	53			24	16	16			17	17				16				17	12	12
Q01780	Exosome component 10 OS=Homo sapiens GN=EXOSC10 PE=1 SV=2 - [EXOSX_HUMAN]	52.99			1.69	3.05	6.1	8.36	6.21	4.52	4.18	7.91	1.02	6.1	2.6	5.54	5.42		5.99	1.92	1.69
P61244-2	Isoform 2 of Protein max OS=Homo sapiens GN=MAX - [MAX_HUMAN]	52.98	16.56	15.23	8.61			9.27											6.62	13.91
Q9H2P9	Diphthine synthase OS=Homo sapiens GN=DPH5 PE=1 SV=2 - [DPH5_HUMAN]	52.98		7.02	6.67	3.16			16.14	4.56	4.56		3.86	11.23		6.67						7.37
Q9UNZ2	NSFL1 cofactor p47 OS=Homo sapiens GN=NSFL1C PE=1 SV=2 - [NSF1C_HUMAN]	52.97			8.65	11.89	9.73	6.22	6.49	4.05	3.24	6.22	2.97	2.43		10.27	10	7.3	7.84	13.51	4.59	5.95
P51398-2	Isoform 2 of 28S ribosomal protein S29, mitochondrial OS=Homo sapiens GN=DAP3 - [RT29_HUMAN]	52.94	8.68	11.2	3.08	5.04		3.92	3.92		7.84	4.2	5.04	3.08		8.12	2.8	2.8	3.08			7.56
F8W9B4	Replication factor C subunit 5 OS=Homo sapiens GN=RFC5 PE=2 SV=1 - [F8W9B4_HUMAN]	52.94		3.92	13.33		2.75	3.14					3.92			7.45	20.39	8.63	7.06	5.88	5.88	3.92
P61163	Alpha-centractin OS=Homo sapiens GN=ACTR1A PE=1 SV=1 - [ACTZ_HUMAN]	52.93	10.11			2.93	3.99	3.99			12.23	10.11		4.79		11.44	2.66		8.78	6.91	4.26
Q9UGI8-2	Isoform 2 of Testin OS=Homo sapiens GN=TES - [TES_HUMAN]	52.91	14.56	5.83	2.91	2.91		5.1	12.62	8.5	3.64	3.64	6.07	17.23	16.75		3.4	8.5	1.94	5.83	5.58	8.25
Q9NP72	Ras-related protein Rab-18 OS=Homo sapiens GN=RAB18 PE=1 SV=1 - [RAB18_HUMAN]	52.91		6.31	7.28						5.34			14.56		12.62					6.8
P29373	Cellular retinoic acid-binding protein 2 OS=Homo sapiens GN=CRABP2 PE=1 SV=2 - [RABP2_HUMAN]	52.9	6.52	5.8		13.04	6.52							6.52		5.07		11.59	11.59	10.87
P35244	Replication protein A 14 kDa subunit OS=Homo sapiens GN=RPA3 PE=1 SV=1 - [RFA3_HUMAN]	52.89	15.7	16.53		13.22		6.61						8.26	9.92		14.05			14.05
Q9UHY7	Enolase-phosphatase E1 OS=Homo sapiens GN=ENOPH1 PE=1 SV=1 - [ENOPH_HUMAN]	52.87		3.07						8.43	8.43	23.75	9.96	7.66	7.66	8.05					4.98	9.58
Q13200	26S proteasome non-ATPase regulatory subunit 2 OS=Homo sapiens GN=PSMD2 PE=1 SV=3 - [PSMD2_HUMAN]	52.86	1.87	2.64	3.52	8.59	6.83	6.83	7.38	11.23	7.82	9.69	5.4	4.96	13.11	4.19	6.72	4.74	3.19	5.84	0.88	2.53
P21281	V-type proton ATPase subunit B, brain isoform OS=Homo sapiens GN=ATP6V1B2 PE=1 SV=3 - [VATB2_HUMAN]	52.84	4.31	13.7	3.91	2.35	2.35	5.28	10.76	2.54	2.15	5.09	12.33	4.31	2.15				4.11	3.33		2.74
I3L0X5	Sperm-associated antigen 7 OS=Homo sapiens GN=SPAG7 PE=2 SV=1 - [I3L0X5_HUMAN]	52.84	13.07														5.68	7.39	15.34	12.5	6.25	11.36
Q9BXF6	Rab11 family-interacting protein 5 OS=Homo sapiens GN=RAB11FIP5 PE=1 SV=1 - [RFIP5_HUMAN]	52.83		1.99	7.81	2.45		6.13	6.74	5.51	5.51	3.52		2.76		5.51	3.98	4.13	2.6	5.21	1.23
P30622-2	Isoform 3 of CAP-Gly domain-containing linker protein 1 OS=Homo sapiens GN=CLIP1 - [CLIP1_HUMAN]	52.8	4.96	2.44	4.53	3.88	2.95	7.11	1.87	2.73	2.73	2.08	3.81	6.03	4.31	4.24	4.6	6.03	5.68	5.1	2.95	6.11
P11216	Glycogen phosphorylase, brain form OS=Homo sapiens GN=PYGB PE=1 SV=5 - [PYGB_HUMAN]	52.79	7.35	10.32	7.59	3.32	8.42	5.46	1.9	1.9	2.85	2.37	3.56	7.12	6.64	8.19	4.15	4.74	3.44	0.95	4.63	8.07
Q14204	Cytoplasmic dynein 1 heavy chain 1 OS=Homo sapiens GN=DYNC1H1 PE=1 SV=5 - [DYHC1_HUMAN]	52.78	6.46	6.05	4.26	2.73	4.09	4.91	4	5.7	7.43	6.87	8.54	5.47	7.23	5.02	4.65	4.5	4.99	5.6	5.12	5.27
O95684-2	Isoform 2 of FGFR1 oncogene partner OS=Homo sapiens GN=FGFR1OP - [FR1OP_HUMAN]	52.77	12.14	4.22	3.17	8.18	3.43						2.9	5.54	9.5	6.33	9.23			4.22	6.33
Q86U44	N6-adenosine-methyltransferase 70 kDa subunit OS=Homo sapiens GN=METTL3 PE=1 SV=2 - [MTA70_HUMAN]	52.76	8.45	7.93	2.41		6.21	6.72		9.31	2.93	5.52	5.34	5.69		2.59		1.9	1.9		2.59	8.45
P36507	Dual specificity mitogen-activated protein kinase kinase 2 OS=Homo sapiens GN=MAP2K2 PE=1 SV=1 - [MP2K2_HUMAN]	52.75	5	11	5.25	6.75		11	11	2.75	8.5	6.25	13	2.75	9	9.5	6.75	9	3	8.25	8	11.5
Q08378	Golgin subfamily A member 3 OS=Homo sapiens GN=GOLGA3 PE=1 SV=2 - [GOGA3_HUMAN]	52.74	5.27	3.67	4.47	2.67	3.94	1.34	2.54	3.07	4.21	1.8	4.14	1.74	5.27	3	1.27	3.14	3.2	6.74	6.48	5.67
Q9NV31	U3 small nucleolar ribonucleoprotein protein IMP3 OS=Homo sapiens GN=IMP3 PE=1 SV=1 - [IMP3_HUMAN]	52.72					5.43				8.7			3.8		3.8	7.07	7.07	9.78	17.93	17.93
Q13616	Cullin-1 OS=Homo sapiens GN=CUL1 PE=1 SV=2 - [CUL1_HUMAN]	52.71	1.03	5.28	4.51	10.95	3.48	2.19	6.06	7.35	2.32	5.28	4.38	3.48	2.71	4.77		1.8	1.16	2.71	8.63	6.06
Q9UNP9-2	Isoform B of Peptidyl-prolyl cis-trans isomerase E OS=Homo sapiens GN=PPIE - [PPIE_HUMAN]	52.7	25		5.07	3.38	3.38			2.36				17.57					10.14	8.11	17.23	3.38
Q6UW78	UPF0723 protein C11orf83 OS=Homo sapiens GN=C11orf83 PE=1 SV=2 - [CK083_HUMAN]	52.69	37.63					13.98					15.05	23.66	23.66
O00165	HCLS1-associated protein X-1 OS=Homo sapiens GN=HAX1 PE=1 SV=2 - [HAX1_HUMAN]	52.69		3.94			3.23			19.71	3.94				6.45	11.83				3.23		4.3
J3KS22	L-xylulose reductase (Fragment) OS=Homo sapiens GN=DCXR PE=3 SV=1 - [J3KS22_HUMAN]	52.68	4.91	11.61	11.61				5.36					13.84	4.91	7.14	3.57	13.39	4.46			7.14
P41743	Protein kinase C iota type OS=Homo sapiens GN=PRKCI PE=1 SV=2 - [KPCI_HUMAN]	52.68		3.69	4.19	3.69		9.4	6.04	3.69	6.04	6.38	1.34		1.68	4.03	4.53			11.41	2.18
P49720	Proteasome subunit beta type-3 OS=Homo sapiens GN=PSMB3 PE=1 SV=2 - [PSB3_HUMAN]	52.68		7.8	8.29	15.61	8.29	12.68	17.07		7.32		5.37		5.37	4.88	4.88	12.2	13.17	8.78	14.63	13.66
O60884	DnaJ homolog subfamily A member 2 OS=Homo sapiens GN=DNAJA2 PE=1 SV=1 - [DNJA2_HUMAN]	52.67	5.58	22.33	2.43	6.31	6.31	8.01	2.67				3.4		8.98			9.71	8.01	6.07	6.8	17.23
O75874	Isocitrate dehydrogenase [NADP] cytoplasmic OS=Homo sapiens GN=IDH1 PE=1 SV=2 - [IDHC_HUMAN]	52.66	8.7	8.7	7.25	7.49	7.49	4.83	7	11.35	6.04	13.29		8.7	3.14	8.7	12.8	15.7	10.39	3.14	3.14	11.35
Q32MZ4-3	Isoform 3 of Leucine-rich repeat flightless-interacting protein 1 OS=Homo sapiens GN=LRRFIP1 - [LRRF1_HUMAN]	52.66	15.96	2.53	2.93	6.52	2.26	2.39		4.65	2.13		1.86	9.71	8.78	5.19	6.65	8.78	10.11	7.05	6.91	6.12
O60828-2	Isoform 2 of Polyglutamine-binding protein 1 OS=Homo sapiens GN=PQBP1 - [PQBP1_HUMAN]	52.65	9.85		3.79	7.2						9.47		9.85		3.41	12.5	6.44		3.41	10.23	6.82
Q92616	Translational activator GCN1 OS=Homo sapiens GN=GCN1L1 PE=1 SV=6 - [GCN1L_HUMAN]	52.64	4.31	5.24	3.37	4.49	7.38	5.58	3.59	5.73	8.09	3.89	5.05	4.04	4.75	3.44	7.41	8.2	7.11	5.54	6.63	3.18
C9JBJ6	DNA-directed RNA polymerases I, II, and III subunit RPABC3 OS=Homo sapiens GN=POLR2H PE=2 SV=1 - [C9JBJ6_HUMAN]	52.63														5.26			14.04			33.33
Q96HQ2	CDKN2AIP N-terminal-like protein OS=Homo sapiens GN=CDKN2AIPNL PE=1 SV=1 - [C2AIL_HUMAN]	52.59					15.52				12.07			16.38						8.62		14.66
Q9BXK5	Bcl-2-like protein 13 OS=Homo sapiens GN=BCL2L13 PE=1 SV=1 - [B2L13_HUMAN]	52.58	14.23			3.09	4.74		2.89	5.15	7.01			3.51		5.15	12.58	3.51		7.84		2.68
P23526	Adenosylhomocysteinase OS=Homo sapiens GN=AHCY PE=1 SV=4 - [SAHH_HUMAN]	52.55	10.65	3.47	10.19	13.66	11.57	9.72	12.5	7.18	7.41	9.49	8.1	6.02	9.95	9.03	7.41	10.19	3.01		3.47	5.79
Q9NQW7-3	Isoform 3 of Xaa-Pro aminopeptidase 1 OS=Homo sapiens GN=XPNPEP1 - [XPP1_HUMAN]	52.55	4.2	5.41	5.41	4.8	12.46	6.46	8.71	3.3	7.21	6.01	4.95	11.11	2.25	7.51	4.05	1.65	4.05	2.4
Q9UBC2	Epidermal growth factor receptor substrate 15-like 1 OS=Homo sapiens GN=EPS15L1 PE=1 SV=1 - [EP15R_HUMAN]	52.55	5.67	1.16		0.81	0.93	5.9	4.63	2.43	4.51	2.2	6.94	3.82	6.02	2.08		3.82	4.75	3.7	10.53	2.43
P07311	Acylphosphatase-1 OS=Homo sapiens GN=ACYP1 PE=1 SV=2 - [ACYP1_HUMAN]	52.53						9.09	13.13	13.13		9.09					13.13	17.17	10.1
Q9Y3E5	Peptidyl-tRNA hydrolase 2, mitochondrial OS=Homo sapiens GN=PTRH2 PE=1 SV=1 - [PTH2_HUMAN]	52.51		16.2	12.85							5.03				10.61				7.82	7.82	8.38
Q14566	DNA replication licensing factor MCM6 OS=Homo sapiens GN=MCM6 PE=1 SV=1 - [MCM6_HUMAN]	52.5	5.12	9.26	5.72	4.26	1.95	6.7	5.97	7.43	7.92	6.82	6.94	5.48	5.85	3.53		3.78	6.58	4.75	0.85	8.04
Q6QNY0	Biogenesis of lysosome-related organelles complex 1 subunit 3 OS=Homo sapiens GN=BLOC1S3 PE=1 SV=1 - [BL1S3_HUMAN]	52.48										12.38	7.92			12.38	11.39	6.93		9.41	9.41
Q6RFH5	WD repeat-containing protein 74 OS=Homo sapiens GN=WDR74 PE=1 SV=1 - [WDR74_HUMAN]	52.47		9.09	4.94	1.82	11.17	2.34			7.79	4.16		3.64	7.79	9.61	6.49	12.47			4.16	9.09
O76094	Signal recognition particle subunit SRP72 OS=Homo sapiens GN=SRP72 PE=1 SV=3 - [SRP72_HUMAN]	52.46	1.49	4.32	8.05		8.49	8.49	16.69	11.18	8.64			1.49	2.53	1.49	2.53	3.73	1.19	1.64	1.64	12.82
Q13185	Chromobox protein homolog 3 OS=Homo sapiens GN=CBX3 PE=1 SV=4 - [CBX3_HUMAN]	52.46	16.39				6.56	6.56	6.56				7.1	16.39	15.85	15.85	15.85				6.56	8.74
P80297	Metallothionein-1X OS=Homo sapiens GN=MT1X PE=1 SV=1 - [MT1X_HUMAN]	52.46				19.67		19.67	19.67						19.67		32.79
P02795	Metallothionein-2 OS=Homo sapiens GN=MT2A PE=1 SV=1 - [MT2_HUMAN]	52.46				19.67		19.67	19.67						19.67					32.79	32.79	32.79
Q08AG7	Mitotic-spindle organizing protein 1 OS=Homo sapiens GN=MZT1 PE=1 SV=2 - [MZT1_HUMAN]	52.44		19.51					13.41							19.51	19.51
O95639	Cleavage and polyadenylation specificity factor subunit 4 OS=Homo sapiens GN=CPSF4 PE=1 SV=1 - [CPSF4_HUMAN]	52.42	5.58	7.81		6.69	27.88					4.46		5.58			4.46			6.69		4.46
Q8NEJ9-2	Isoform 2 of Neuroguidin OS=Homo sapiens GN=NGDN - [NGDN_HUMAN]	52.41		5.79			3.54		9.32	4.82			11.25		13.83	9				7.72	3.22	5.79
P04899	Guanine nucleotide-binding protein G(i) subunit alpha-2 OS=Homo sapiens GN=GNAI2 PE=1 SV=3 - [GNAI2_HUMAN]	52.39	18.03			3.38	9.58	3.38		8.73	4.23	6.76		6.76	5.35				4.23	8.73	4.79
P01111	GTPase NRas OS=Homo sapiens GN=NRAS PE=1 SV=1 - [RASN_HUMAN]	52.38			7.94	7.94	6.35		5.82	5.82				13.76		13.76	14.29				13.23	17.99
Q15654	Thyroid receptor-interacting protein 6 OS=Homo sapiens GN=TRIP6 PE=1 SV=3 - [TRIP6_HUMAN]	52.31			4.83	4.83		7.14	22.27	18.7	7.77	9.24	7.56	1.89	5.25	1.89	1.68	1.89				4.2
E9PL22	Hypoxia up-regulated protein 1 OS=Homo sapiens GN=HYOU1 PE=2 SV=1 - [E9PL22_HUMAN]	52.29	4.38	5.76	7.26	7.58	4.59	5.12	2.35	7.04	8.64	14.19	6.08	6.72	4.8	6.62	1.71	2.99	5.55	12.27	6.51	8.54
O95861	3'(2'),5'-bisphosphate nucleotidase 1 OS=Homo sapiens GN=BPNT1 PE=1 SV=1 - [BPNT1_HUMAN]	52.27	3.9			12.66	14.61	12.34			9.09	5.52	8.12	3.9	5.52				4.22	4.22	7.14	4.22
P49721	Proteasome subunit beta type-2 OS=Homo sapiens GN=PSMB2 PE=1 SV=1 - [PSB2_HUMAN]	52.24	6.47	3.98	3.98	3.98	8.46	14.93	4.48		9.45	9.45	16.42	6.47	17.91		8.96	8.46	4.98	11.44
D6RGI3	Septin 11, isoform CRA_b OS=Homo sapiens GN=SEPT11 PE=2 SV=1 - [D6RGI3_HUMAN]	52.24	3.06	12.71	2.12			5.65	7.06	9.18	3.06	9.65	9.65		3.06	8	4.47	11.76	17.65	4.47	8.94	6.82
Q9NPF4	Probable tRNA threonylcarbamoyladenosine biosynthesis protein OSGEP OS=Homo sapiens GN=OSGEP PE=1 SV=1 - [OSGEP_HUMAN]	52.24		8.36			8.36	4.78						8.06	3.28		8.36	13.73	11.94			5.07
P56192	Methionine--tRNA ligase, cytoplasmic OS=Homo sapiens GN=MARS PE=1 SV=2 - [SYMC_HUMAN]	52.22	2.67	3.33	2.44	5	3.44	5.33	3		9.11	12.89	14	2.67	10.22	4.11	9.11	14.78	7.56	4.44	3.44	5.56
Q9Y6N5	Sulfide:quinone oxidoreductase, mitochondrial OS=Homo sapiens GN=SQRDL PE=1 SV=1 - [SQRD_HUMAN]	52.22	1.56	6.89					18	13.33	9.11	13.33	15.33	4.67		2.22	6.44	2.22	2		2.89	8.44
P14923	Junction plakoglobin OS=Homo sapiens GN=JUP PE=1 SV=3 - [PLAK_HUMAN]	52.21	4.03	2.82		2.55	4.7	9.66	2.68	3.49	4.43	7.92	4.43	9.53	14.77	8.59	2.28	1.21		7.38	6.85	1.61
Q6P1N9	Putative deoxyribonuclease TATDN1 OS=Homo sapiens GN=TATDN1 PE=1 SV=2 - [TATD1_HUMAN]	52.19		4.38	4.38	4.38		3.03	3.7	6.4	4.38				7.07	3.7	9.76	2.36	3.37		5.72
P00390-2	Isoform Cytoplasmic of Glutathione reductase, mitochondrial OS=Homo sapiens GN=GSR - [GSHR_HUMAN]	52.19		2.3	2.92	6.05	4.38	8.14	4.8	10.86	9.39	3.34	4.59		8.14		4.8	4.59		2.3	4.8	10.23
Q12888	Tumor suppressor p53-binding protein 1 OS=Homo sapiens GN=TP53BP1 PE=1 SV=2 - [TP53B_HUMAN]	52.18	4.77	6.69	1.17	5.78	2.64	2.23	5.78	3.55	5.07	5.27	8.47	1.93	6.49	4.67	1.77	1.12	0.56	2.74	5.53	1.93
H0YB70	Putative hydroxypyruvate isomerase (Fragment) OS=Homo sapiens GN=HYI PE=4 SV=1 - [H0YB70_HUMAN]	52.15						11.29				6.45	10.75				12.37	5.91		5.38
Q13492-3	Isoform 3 of Phosphatidylinositol-binding clathrin assembly protein OS=Homo sapiens GN=PICALM - [PICAL_HUMAN]	52.13	1.64		1.8	2.95	2.46	5.74	10.66	5.74	4.92	11.64	7.87	11.8	2.46	18.52	12.46	4.1	11.15	4.43	4.43
P60228	Eukaryotic translation initiation factor 3 subunit E OS=Homo sapiens GN=EIF3E PE=1 SV=1 - [EIF3E_HUMAN]	52.13		4.04	2.25	4.49	11.46	13.93	8.09	10.34	6.52	9.44	4.04	2.02			4.27	2.02	4.27	6.29	2.92	2.25
Q14980-2	Isoform 2 of Nuclear mitotic apparatus protein 1 OS=Homo sapiens GN=NUMA1 - [NUMA1_HUMAN]	52.12	4.57	5.76	3.47	4.09	3	2.09	3.47	5.66	3.76	5.76	5.38	5.95	4.19	7.14	5.05	2.62	6.71	8.09	5.33	6.85
Q96TA1-2	Isoform 2 of Niban-like protein 1 OS=Homo sapiens GN=FAM129B - [NIBL1_HUMAN]	52.11	6.68	1.5	2.86	5.46	5.46	8.73	4.23	1.23		2.73	5.18		2.46	10.5	1.23	4.5	7.09	8.87	1.5	4.23
Q9NVK5-2	Isoform 2 of FGFR1 oncogene partner 2 OS=Homo sapiens GN=FGFR1OP2 - [FGOP2_HUMAN]	52.09					17.21			4.19			9.77			10.23	3.26			7.44
G3V2S6	V-type proton ATPase subunit D OS=Homo sapiens GN=ATP6V1D PE=2 SV=1 - [G3V2S6_HUMAN]	52.08		4.17					5.73			14.58	6.25					12.5		14.58
Q8N183	Mimitin, mitochondrial OS=Homo sapiens GN=NDUFAF2 PE=1 SV=1 - [MIMIT_HUMAN]	52.07	6.51	5.92				5.92	5.92	10.65	10.65				17.75	5.92	4.73		13.02	13.02		6.51
Q9UKK9	ADP-sugar pyrophosphatase OS=Homo sapiens GN=NUDT5 PE=1 SV=1 - [NUDT5_HUMAN]	52.05	6.85		5.02	9.13	18.72	13.7	13.7					6.85	6.85	5.94	5.94	12.79	20.09	9.13
Q8NI22	Multiple coagulation factor deficiency protein 2 OS=Homo sapiens GN=MCFD2 PE=1 SV=1 - [MCFD2_HUMAN]	52.05	8.9			11.64	16.44	16.44														23.97
P52597	Heterogeneous nuclear ribonucleoprotein F OS=Homo sapiens GN=HNRNPF PE=1 SV=3 - [HNRPF_HUMAN]	52.05		7.95	5.78	4.58	12.29	15.42	19.52	5.06	1.93	4.58	4.58	9.64	15.66	14.94	15.42	11.81	14.7	9.88	12.53	7.95
E9PQY5	Nuclear pore complex protein Nup160 OS=Homo sapiens GN=NUP160 PE=2 SV=1 - [E9PQY5_HUMAN]	52.04		8.16	18.37	18.37								15.31		15.31			10.2
B4DT31	Far upstream element-binding protein 1 OS=Homo sapiens GN=FUBP1 PE=2 SV=1 - [B4DT31_HUMAN]	52.03	4.66	12.33		5.26	5.41	3.01	3.01	2.26	1.95	3.91	10.53	6.17	7.07	6.47	7.07	4.66	8.87	13.23	9.32	12.63
Q9Y512	Sorting and assembly machinery component 50 homolog OS=Homo sapiens GN=SAMM50 PE=1 SV=3 - [SAM50_HUMAN]	52.03		7.46	2.35			1.49		6.4	4.48	2.56	2.56	3.62	2.56	8.32	8.74	7.68	7.68	5.54	8.1	5.12
Q9UGI8	Testin OS=Homo sapiens GN=TES PE=1 SV=1 - [TES_HUMAN]	52.02	14.25	5.7	6.65	2.85		4.99	12.35	8.31	3.56	3.56	5.94	13.54	16.39		3.33	8.31	1.9	5.7	5.46	8.08
Q7Z5L9-2	Isoform 2 of Interferon regulatory factor 2-binding protein 2 OS=Homo sapiens GN=IRF2BP2 - [I2BP2_HUMAN]	52.01	1.75	4.55	2.8	7.71	9.11	6.3	8.23	4.9	9.81	2.45	5.25	2.98		5.6	9.46	8.93	7.01		4.38	2.63
Q9GZL7	Ribosome biogenesis protein WDR12 OS=Homo sapiens GN=WDR12 PE=1 SV=2 - [WDR12_HUMAN]	52.01		3.07	1.89		6.62	6.86	9.46	12.06	5.91	5.91	13.71	1.89	2.84			2.84	2.84	7.09	7.09	3.07
Q8TAT6	Nuclear protein localization protein 4 homolog OS=Homo sapiens GN=NPLOC4 PE=1 SV=3 - [NPL4_HUMAN]	51.97	1.81	7.24			1.15		6.09	5.76	11.18	7.4	2.47	7.07	1.64	14.31	6.25	2.8	2.3	5.76	2.47	7.73
P53396	ATP-citrate synthase OS=Homo sapiens GN=ACLY PE=1 SV=3 - [ACLY_HUMAN]	51.95	5	10.72	11.35	11.53	5.09	8.99	5.72	7.9	4.18	4.63	6.27	5.9	9.81	5.36	6.36	3.91	6.18	11.9	5.81	7.72
O15212	Prefoldin subunit 6 OS=Homo sapiens GN=PFDN6 PE=1 SV=1 - [PFD6_HUMAN]	51.94	10.85		28.68	6.98				9.3	9.3		7.75		18.6	6.2				7.75	15.5	8.53
Q9NX55	Huntingtin-interacting protein K OS=Homo sapiens GN=HYPK PE=1 SV=2 - [HYPK_HUMAN]	51.94	8.53	11.63	11.63	19.38	19.38					13.18	20.16		13.18	11.63		10.85			13.95
P46063	ATP-dependent DNA helicase Q1 OS=Homo sapiens GN=RECQL PE=1 SV=3 - [RECQ1_HUMAN]	51.93	5.08	20.03	1.54	6.32			2.16	1.23	2.47	4.78	6.93	1.39	4.62	7.4	3.54	6.63	9.24	4.93	11.09	15.87
P49589-2	Isoform 2 of Cysteine--tRNA ligase, cytoplasmic OS=Homo sapiens GN=CARS - [SYCC_HUMAN]	51.93	8.4	4.82	4.41	12.67	4.27	3.72	4.68	3.31	2.89	1.65	1.38	7.99	7.16	3.58	1.1		4.96	5.1	7.16	2.07
P62750	60S ribosomal protein L23a OS=Homo sapiens GN=RPL23A PE=1 SV=1 - [RL23A_HUMAN]	51.92	8.97	7.05	7.05	7.69	7.05	7.69	7.69	16.03	7.69	19.23	7.69	6.41		19.23	6.41	14.74	27.56	28.21	20.51	12.82
C9JZL3	UDP-N-acetylglucosamine--peptide N-acetylglucosaminyltransferase 110 kDa subunit (Fragment) OS=Homo sapiens GN=OGT PE=2 SV=1 - [C9JZL3_HUMAN]	51.92	7.69									10.9		5.13				7.69		7.05	12.82	8.33
Q9P287	BRCA2 and CDKN1A-interacting protein OS=Homo sapiens GN=BCCIP PE=1 SV=1 - [BCCIP_HUMAN]	51.91	7.32	4.78					12.42	16.24	8.28	7.64	5.41	7.32		7.32	5.1	12.42		7.01	4.46	9.55
Q96I15	Selenocysteine lyase OS=Homo sapiens GN=SCLY PE=1 SV=2 - [SCLY_HUMAN]	51.91	4.49			2.47		6.07	4.27	3.82		3.82	4.72	6.29		4.49		3.37	7.19		4.27
Q14980	Nuclear mitotic apparatus protein 1 OS=Homo sapiens GN=NUMA1 PE=1 SV=2 - [NUMA1_HUMAN]	51.91	4.54	6.34	3.45	4.07	2.98	2.08	3.45	5.63	3.74	5.72	5.34	5.91	4.16	7.09	5.01	2.6	6.67	8.04	4.82	6.81
Q9NXV6	CDKN2A-interacting protein OS=Homo sapiens GN=CDKN2AIP PE=1 SV=3 - [CARF_HUMAN]	51.9	3.97	2.24	1.55	6.72	2.24	3.79	6.21	5.52				9.14	7.07	7.24	7.07	3.62	3.62	4.14	2.24	2.24
Q9BSJ2	Gamma-tubulin complex component 2 OS=Homo sapiens GN=TUBGCP2 PE=1 SV=2 - [GCP2_HUMAN]	51.88			6.54	6.65	2.88	6.87	2.77	5.99	8.54		1.55		5.54		4.77	2.44	1.44	5.43	6.54
Q92882	Osteoclast-stimulating factor 1 OS=Homo sapiens GN=OSTF1 PE=1 SV=2 - [OSTF1_HUMAN]	51.87	6.54		5.61	12.62						20.56	11.68	6.54		14.02	14.49			7.94	3.74
P30566	Adenylosuccinate lyase OS=Homo sapiens GN=ADSL PE=1 SV=2 - [PUR8_HUMAN]	51.86	3.31		4.13		11.57	10.95			3.72			8.68	11.57	11.98	11.98	2.69	8.06	2.27	6.2
E7EWI9	Heterogeneous nuclear ribonucleoprotein A3 OS=Homo sapiens GN=HNRNPA3 PE=2 SV=1 - [E7EWI9_HUMAN]	51.86	6.52	9.01	6.83	21.74	2.17	7.14	4.97	20.19	23.6	29.5	19.25	6.52	13.35	8.7	11.49	2.48	5.59	12.11	5.59	9.32
E9PLL6	60S ribosomal protein L27a OS=Homo sapiens GN=RPL27A PE=2 SV=1 - [E9PLL6_HUMAN]	51.85	22.22		20.37			11.11	11.11	28.7	12.04	22.22	10.19	10.19	10.19	19.44	19.44	11.11			8.33	8.33
H3BQQ1	COX assembly mitochondrial protein 2 homolog (Fragment) OS=Homo sapiens GN=CMC2 PE=4 SV=1 - [H3BQQ1_HUMAN]	51.85		18.52							27.78				18.52		24.07			18.52
Q96DG6	Carboxymethylenebutenolidase homolog OS=Homo sapiens GN=CMBL PE=1 SV=1 - [CMBL_HUMAN]	51.84	6.12		4.08						6.94	15.51	8.57	13.06	5.71	9.8	9.8	10.61	6.94	15.1	5.71	3.67
Q9UKX7-2	Isoform 2 of Nuclear pore complex protein Nup50 OS=Homo sapiens GN=NUP50 - [NUP50_HUMAN]	51.82	2.73	3.18	2.95					7.05	12.05		5.68	3.41	5.68	2.95		11.36	15	7.5
P0CB43	Protein FAM203B OS=Homo sapiens GN=FAM203B PE=2 SV=1 - [F203B_HUMAN]	51.79	5.9	5.64		5.13			4.62	8.97			8.72	5.9			6.15	9.23		6.15	6.15	3.08
P21912	Succinate dehydrogenase [ubiquinone] iron-sulfur subunit, mitochondrial OS=Homo sapiens GN=SDHB PE=1 SV=3 - [DHSB_HUMAN]	51.79						3.57	8.21	5		6.43	13.93	17.5		5.71					7.5	11.79
Q9UJX3-2	Isoform 2 of Anaphase-promoting complex subunit 7 OS=Homo sapiens GN=ANAPC7 - [APC7_HUMAN]	51.77		2.42	4.1	6.33	1.49	11.36	3.35	1.86	8.75		2.79	2.79				2.23		2.05	7.45	6.33
Q8N726-2	Isoform 6 of Cyclin-dependent kinase inhibitor 2A, isoform 4 OS=Homo sapiens GN=CDKN2A - [CD2A2_HUMAN]	51.76		22.35				9.41				20	20
Q96G28	Coiled-coil domain-containing protein 104 OS=Homo sapiens GN=CCDC104 PE=1 SV=2 - [CC104_HUMAN]	51.75	6.14				6.43			9.36		4.39		7.02			11.7	2.92	2.92			3.8
Q99933-4	Isoform 4 of BAG family molecular chaperone regulator 1 OS=Homo sapiens GN=BAG1 - [BAG1_HUMAN]	51.74	11.3			5.22		6.52	6.52							29.13	34.78	4.35		14.78
Q52LJ0-2	Isoform 2 of Protein FAM98B OS=Homo sapiens GN=FAM98B - [FA98B_HUMAN]	51.73	12.47	2.77	3.46	7.39	10.16	10.85	3.7		3.23	3.23		8.08	11.09	2.54	3.93		6.47	3	9.01	1.62
P35580	Myosin-10 OS=Homo sapiens GN=MYH10 PE=1 SV=3 - [MYH10_HUMAN]	51.72	6.12	6.98	6.88	2.73	6.38	4.55	4.91	4.86	5.87	2.94	1.82	6.83	6.63	7.84	8.6	10.12	6.33	7.74	6.07	6.78
J3KRP6	Protein SSXT OS=Homo sapiens GN=SS18 PE=4 SV=1 - [J3KRP6_HUMAN]	51.72					31.03										20.69	20.69
Q9NVI7-2	Isoform 2 of ATPase family AAA domain-containing protein 3A OS=Homo sapiens GN=ATAD3A - [ATD3A_HUMAN]	51.71	7	1.71	5.29	6.66	1.88	6.66	7	5.12	3.92	3.92	10.24	6.31	11.43	3.41	4.27					4.44
O43242	26S proteasome non-ATPase regulatory subunit 3 OS=Homo sapiens GN=PSMD3 PE=1 SV=2 - [PSMD3_HUMAN]	51.69		2.62	5.62	12.36	4.12	2.81		2.06	2.06	3.75	5.24	4.12	1.69	10.11	7.3	4.49	2.06	4.87	13.11	3.93
Q13573	SNW domain-containing protein 1 OS=Homo sapiens GN=SNW1 PE=1 SV=1 - [SNW1_HUMAN]	51.68	5.22		6.34	4.1	6.9	10.45	7.28			1.49	5.04	1.31	2.8	2.43	5.04	4.85	10.45	2.05
Q8NE71	ATP-binding cassette sub-family F member 1 OS=Homo sapiens GN=ABCF1 PE=1 SV=2 - [ABCF1_HUMAN]	51.6	3.2	4.02	3.67	6.27	12.31	9.11	8.76	14.2	6.98	5.8	3.55	4.73	6.27	5.68	5.09	10.41	2.37	9.94	6.63	4.38
Q15833	Syntaxin-binding protein 2 OS=Homo sapiens GN=STXBP2 PE=1 SV=2 - [STXB2_HUMAN]	51.6	1.69	3.04		3.04	2.53	3.04	8.6	4.89	6.07	3.04		10.46	1.35	7.93	5.73	5.4	3.88	4.55	2.19	3.04
P61011	Signal recognition particle 54 kDa protein OS=Homo sapiens GN=SRP54 PE=1 SV=1 - [SRP54_HUMAN]	51.59	4.17	9.92	7.74		6.35	12.9	6.35		5.56	2.78	1.59	2.18	5.16	1.39	3.57	7.94	15.08	9.33	3.57	3.97
Q13501	Sequestosome-1 OS=Homo sapiens GN=SQSTM1 PE=1 SV=1 - [SQSTM_HUMAN]	51.59		3.18	7.05	14.09	7.05	7.27	7.27			5.45	5.45	3.64		5.68	10.45	7.95	10.91	9.55	9.32	3.18
Q14134-2	Isoform Beta of Tripartite motif-containing protein 29 OS=Homo sapiens GN=TRIM29 - [TRI29_HUMAN]	51.58	7.02	6.14	2.63		2.46	4.56	4.56		2.46	6.32	3.68	1.93	2.28	5.79	8.95		1.23	10.35	17.37	8.77
Q13155	Aminoacyl tRNA synthase complex-interacting multifunctional protein 2 OS=Homo sapiens GN=AIMP2 PE=1 SV=2 - [AIMP2_HUMAN]	51.56		17.81	7.81	7.81	2.5		16.25		8.13	2.81				2.81	4.06	4.06	5.31	5.31	3.75	3.75
P55809	Succinyl-CoA:3-ketoacid coenzyme A transferase 1, mitochondrial OS=Homo sapiens GN=OXCT1 PE=1 SV=1 - [SCOT1_HUMAN]	51.54	4.42	5.96	6.35	4.04	3.85	10.58	6.73	1.35		3.08	7.31	7.31	14.62	8.85	4.04	4.04	3.85	6.54		4.04
P49023-2	Isoform Alpha of Paxillin OS=Homo sapiens GN=PXN - [PAXI_HUMAN]	51.53		3.23		5.39		4.85	11.85	15.44	11.49	6.46						4.67	10.77	6.82	2.69	3.23
O95372	Acyl-protein thioesterase 2 OS=Homo sapiens GN=LYPLA2 PE=1 SV=1 - [LYPA2_HUMAN]	51.52					3.46	11.26	7.79		3.46	3.46	3.46				10.82		22.08	7.79
O43290	U4/U6.U5 tri-snRNP-associated protein 1 OS=Homo sapiens GN=SART1 PE=1 SV=1 - [SNUT1_HUMAN]	51.5	2.63	3.25	1.13	6.38	3.13	2.75	3.25	2.38	1.13		2.75	11.25	4.25	11.13	10.88	7	9.5	6.63	4.63	3.62
P23193	Transcription elongation factor A protein 1 OS=Homo sapiens GN=TCEA1 PE=1 SV=2 - [TCEA1_HUMAN]	51.5	4.65	8.97	14.29	13.62	3.32	6.31	3.32	3.32	3.65		5.98	4.65	10.63	13.95	14.29	12.62		10.3	3.32	4.32
Q13232	Nucleoside diphosphate kinase 3 OS=Homo sapiens GN=NME3 PE=1 SV=2 - [NDK3_HUMAN]	51.48	10.06			7.1	11.24		7.69			5.92		10.06			5.33	4.14	4.14
P13073	Cytochrome c oxidase subunit 4 isoform 1, mitochondrial OS=Homo sapiens GN=COX4I1 PE=1 SV=1 - [COX41_HUMAN]	51.48		7.1	13.61	5.92							5.92	5.33		14.2	6.51	14.2	5.92	17.16	11.83
Q8NC51	Plasminogen activator inhibitor 1 RNA-binding protein OS=Homo sapiens GN=SERBP1 PE=1 SV=2 - [PAIRB_HUMAN]	51.47	12.99	15.93	12.75			2.94	2.7	13.48	11.76	11.03	6.86	7.35	10.54	20.34	11.03	12.01	19.36	24.02	17.65	16.18
P63218	Guanine nucleotide-binding protein G(I)/G(S)/G(O) subunit gamma-5 OS=Homo sapiens GN=GNG5 PE=1 SV=3 - [GBG5_HUMAN]	51.47					13.24	23.53	14.71	14.71		8.82	10.29				14.71			16.18
P31943	Heterogeneous nuclear ribonucleoprotein H OS=Homo sapiens GN=HNRNPH1 PE=1 SV=4 - [HNRH1_HUMAN]	51.45			1.78	9.13	13.81	17.37	24.05	17.37	8.02	6.68	11.14	7.35	12.92	27.62	17.59	18.93	6.01	1.78	6.01	3.79
P14649	Myosin light chain 6B OS=Homo sapiens GN=MYL6B PE=1 SV=1 - [MYL6B_HUMAN]	51.44	6.73	6.25	11.06	12.5	7.69	5.29		9.62		6.25		7.21	6.25		9.13	5.29			6.25	6.25
H0Y8X4	2'-deoxynucleoside 5'-phosphate N-hydrolase 1 (Fragment) OS=Homo sapiens GN=DNPH1 PE=2 SV=1 - [H0Y8X4_HUMAN]	51.44				3.29	10.29	20.16	14.4	20.58		7.41						6.58	6.58
Q9GZR2	RNA exonuclease 4 OS=Homo sapiens GN=REXO4 PE=1 SV=2 - [REXO4_HUMAN]	51.42		7.58	3.08			7.35	9	6.16	4.5	4.74	3.32	3.32	11.37	7.11	7.11	3.55		3.79	3.79	7.58
F8W6L6	Myosin-10 OS=Homo sapiens GN=MYH10 PE=2 SV=1 - [F8W6L6_HUMAN]	51.41	6.07	6.38	6.28	2.71	6.33	5.17	4.87	4.82	5.82	2.91	1.81	6.78	6.58	7.78	8.53	10.04	6.28	7.18	6.02	6.73
P09493-4	Isoform 4 of Tropomyosin alpha-1 chain OS=Homo sapiens GN=TPM1 - [TPM1_HUMAN]	51.41		4.93	14.44	7.39	11.97	8.1	9.86	15.14	9.51	11.97	9.15		3.87	3.17	3.17	6.34	10.21	12.32		8.45
Q02878	60S ribosomal protein L6 OS=Homo sapiens GN=RPL6 PE=1 SV=3 - [RL6_HUMAN]	51.39	4.51	20.49	17.71	10.76	7.64	10.76	11.81	5.56	21.88	5.9	10.07	10.42	11.46	5.9	2.43	9.72	2.78		2.43	17.01
A9IYQ1	Sister chromatid cohesion protein PDS5 homolog B (Fragment) OS=Homo sapiens GN=PDS5B PE=2 SV=1 - [A9IYQ1_HUMAN]	51.32	3.97			4.97	5.63	7.62	15.89	14.57	17.22		2.65			5.63	2.32		5.96	5.96	2.65
P21283	V-type proton ATPase subunit C 1 OS=Homo sapiens GN=ATP6V1C1 PE=1 SV=4 - [VATC1_HUMAN]	51.31			4.45		3.93	4.97	4.19	17.02	4.71	2.09			2.62	4.45	7.07	4.71			8.38
O60313	Dynamin-like 120 kDa protein, mitochondrial OS=Homo sapiens GN=OPA1 PE=1 SV=3 - [OPA1_HUMAN]	51.25	3.75	2.4	3.54	2.71	3.23	2.6	5.73	11.25	3.23	4.06		5.21		6.56	4.69	4.69	5.63	4.69	1.25	1.77
O96008	Mitochondrial import receptor subunit TOM40 homolog OS=Homo sapiens GN=TOMM40 PE=1 SV=1 - [TOM40_HUMAN]	51.25	9.42	6.93	3.88		5.26			1.66	4.99					13.02	2.49		16.62	12.19	4.43	11.36
Q9UKL0	REST corepressor 1 OS=Homo sapiens GN=RCOR1 PE=1 SV=1 - [RCOR1_HUMAN]	51.24	5.39	4.15	1.45			5.39	6.02	3.94		6.43	14.32	2.9	3.32					2.49	5.81	7.05
P61201	COP9 signalosome complex subunit 2 OS=Homo sapiens GN=COPS2 PE=1 SV=1 - [CSN2_HUMAN]	51.24	13.54			4.06	9.26	5.87	2.26	1.58	6.32	6.32	1.81	10.38	6.32			5.64		6.32		4.74
F5H365	Protein transport protein Sec23A OS=Homo sapiens GN=SEC23A PE=2 SV=1 - [F5H365_HUMAN]	51.22	6.39	1.63	1.36	1.63	1.49	5.03	5.98	13.04	7.74	7.2	1.9	6.39	3.8	5.43	2.45		2.99	1.9
Q5T9W8	Heat shock protein HSP 90-beta (Fragment) OS=Homo sapiens GN=HSP90AB1 PE=2 SV=1 - [Q5T9W8_HUMAN]	51.19	13.69	22.02	14.88	16.07	6.55	13.69	7.14		7.14		23.81	27.98	23.81	20.24	20.24	20.24	20.24	31.55	17.26	14.88
P02786	Transferrin receptor protein 1 OS=Homo sapiens GN=TFRC PE=1 SV=2 - [TFR1_HUMAN]	51.18	5.92	3.29	1.45	8.68	9.87	6.05	3.95	4.74	8.95	9.74		3.68	2.63	4.74	3.03	4.47	1.58	4.21	5.39
P40855	Peroxisomal biogenesis factor 19 OS=Homo sapiens GN=PEX19 PE=1 SV=1 - [PEX19_HUMAN]	51.17		5.02	8.03	11.71	8.03	6.69	6.69	6.69					7.02		10.37	10.37	9.03	15.72	5.69	5.02
A4D1E9	GTP-binding protein 10 OS=Homo sapiens GN=GTPBP10 PE=1 SV=1 - [GTPBA_HUMAN]	51.16				2.84	9.3	5.68			2.33	7.49	4.65	5.43		5.94	7.49	6.72	6.72	9.56		2.58
Q92785	Zinc finger protein ubi-d4 OS=Homo sapiens GN=DPF2 PE=1 SV=2 - [REQU_HUMAN]	51.15	7.67	2.81	5.12	6.91		3.84	3.84					11		8.7	3.07	13.04	2.56		3.84	4.35
O75533	Splicing factor 3B subunit 1 OS=Homo sapiens GN=SF3B1 PE=1 SV=3 - [SF3B1_HUMAN]	51.15	5.44	5.52	2.15	2.84	3.07	1.07	2.91	6.52	5.14	6.83	7.44	6.44	6.29	5.21	8.67	7.9	3.14	6.13	4.75	7.67
P62993	Growth factor receptor-bound protein 2 OS=Homo sapiens GN=GRB2 PE=1 SV=1 - [GRB2_HUMAN]	51.15		5.53	12.9	11.98	4.15					5.53	11.98				4.61	17.97	15.21	3.23
P17655	Calpain-2 catalytic subunit OS=Homo sapiens GN=CAPN2 PE=1 SV=6 - [CAN2_HUMAN]	51.14	12.14	4.43	13	2.14	5.43	10.57	1.43		1.14	4.14	1.57	2.43	6.14	9	8.14	4.43	7	1.14		7.43
J3KR24	Isoleucine--tRNA ligase, cytoplasmic OS=Homo sapiens GN=IARS PE=4 SV=1 - [J3KR24_HUMAN]	51.13	6.68	5.73	8.51	5.3	1.48	5.3	3.21	5.99	8.25	7.29	6.34	6.16	4.51	8.42	2.95	1.04		6.6	6.86	7.9
P62424	60S ribosomal protein L7a OS=Homo sapiens GN=RPL7A PE=1 SV=2 - [RL7A_HUMAN]	51.13		12.78	9.77	10.53	7.14	16.17	14.66	16.17	29.7	26.32	18.05	4.14	6.77	13.16	10.9	15.04	16.92	18.42	20.68	15.79
Q7L014	Probable ATP-dependent RNA helicase DDX46 OS=Homo sapiens GN=DDX46 PE=1 SV=2 - [DDX46_HUMAN]	51.12		8.24	3.59	0.87	2.33	12.9	4.27	6.5	13.29	10.86	3.2	3.59	6.5	6.11	3.39	4.07	0.97		3.39	8.44
P26640	Valine--tRNA ligase OS=Homo sapiens GN=VARS PE=1 SV=4 - [SYVC_HUMAN]	51.11	3.64	9.41	8.94	9.65	6.8	7.28	5.78	8.94	10.44	3.24	7.04	4.11	13.21	5.7	3.88	3.88	1.34	7.52	5.46	3.64
Q9H6F5	Coiled-coil domain-containing protein 86 OS=Homo sapiens GN=CCDC86 PE=1 SV=1 - [CCD86_HUMAN]	51.11	9.72	3.61			3.06		2.5	2.5	6.11	3.06	6.67	3.33	15	5.83			6.11	4.72
P78406	mRNA export factor OS=Homo sapiens GN=RAE1 PE=1 SV=1 - [RAE1L_HUMAN]	51.09						14.4	14.4	7.88	3.53	5.98	2.45	3.8		2.72	5.16	11.96	10.05		4.89
Q9BY77	Polymerase delta-interacting protein 3 OS=Homo sapiens GN=POLDIP3 PE=1 SV=2 - [PDIP3_HUMAN]	51.07	3.09	3.8			6.18	10.45	1.9	4.51	7.6		3.33	5.23		2.14	7.6	4.51	6.65	9.03	5.94
B1ANR0	Poly(A) binding protein, cytoplasmic 4 (Inducible form), isoform CRA_e OS=Homo sapiens GN=PABPC4 PE=2 SV=1 - [B1ANR0_HUMAN]	51.06	4.23	9.43	5.69	4.55	18.7	10.57	12.36	4.55	4.23	7.32	7.8	2.76	11.38	2.76	8.46	6.67	3.25	6.02	3.25	15.77
J3KSH8	Hematological and neurological-expressed 1 protein (Fragment) OS=Homo sapiens GN=HN1 PE=4 SV=1 - [J3KSH8_HUMAN]	51.06	10.64									18.09		10.64			15.96			35.11	35.11
B7Z3Y2	Prenylcysteine oxidase 1 OS=Homo sapiens GN=PCYOX1 PE=2 SV=1 - [B7Z3Y2_HUMAN]	51.05	2.34	6.09	8.67		5.15		3.28	2.11		3.04	9.13	6.32	9.13	5.39	4.68	3.04	8.67	5.85	2.11	2.58
P20618	Proteasome subunit beta type-1 OS=Homo sapiens GN=PSMB1 PE=1 SV=2 - [PSB1_HUMAN]	51.04	14.11	14.52	10.79	7.05		4.56	4.56	5.81	5.81	3.73	17.01	14.11	3.73	8.3			4.15	4.15	13.28	18.26
Q92841	Probable ATP-dependent RNA helicase DDX17 OS=Homo sapiens GN=DDX17 PE=1 SV=2 - [DDX17_HUMAN]	51.03	3.98	7.68	7.82	5.08	2.74	11.11	8.37	3.43	14.4	6.45	5.9	4.39	6.17	2.74	3.43	4.66	6.58	4.53	4.8	4.12
J3KNU8	Methylmalonate-semialdehyde dehydrogenase [acylating], mitochondrial OS=Homo sapiens GN=ALDH6A1 PE=3 SV=1 - [J3KNU8_HUMAN]	50.96	6.51	11.3	10.73	4.02	6.13	9		1.53	1.34		1.53	1.72	3.83	5.36	3.45		4.79		5.56	5.56
Q9UMR2	ATP-dependent RNA helicase DDX19B OS=Homo sapiens GN=DDX19B PE=1 SV=1 - [DD19B_HUMAN]	50.94	4.59	6.68	3.97	4.59	4.18	13.57	11.9	8.35		3.97	15.03	2.09	5.22	6.68	4.59	4.59				3.13
P35754	Glutaredoxin-1 OS=Homo sapiens GN=GLRX PE=1 SV=2 - [GLRX1_HUMAN]	50.94	31.13				12.26				10.38	10.38	7.55	31.13	18.87
O43920	NADH dehydrogenase [ubiquinone] iron-sulfur protein 5 OS=Homo sapiens GN=NDUFS5 PE=1 SV=3 - [NDUS5_HUMAN]	50.94			11.32	11.32	11.32		12.26	6.6	6.6							14.15	6.6
I3L411	Myc-associated zinc finger protein OS=Homo sapiens GN=MAZ PE=2 SV=1 - [I3L411_HUMAN]	50.94											20.75								28.3	22.64
Q17R31-2	Isoform 2 of Putative deoxyribonuclease TATDN3 OS=Homo sapiens GN=TATDN3 - [TATD3_HUMAN]	50.92	6.23					6.23	6.23			7.33		5.49	20.51	5.13			7.33		7.33
P62879	Guanine nucleotide-binding protein G(I)/G(S)/G(T) subunit beta-2 OS=Homo sapiens GN=GNB2 PE=1 SV=3 - [GBB2_HUMAN]	50.88	3.24	10	2.06			3.82	6.18	12.94	2.94	2.94		8.53	9.12	5.29	7.06		5.59	5.59	11.18	13.53
Q9UBX3	Mitochondrial dicarboxylate carrier OS=Homo sapiens GN=SLC25A10 PE=1 SV=2 - [DIC_HUMAN]	50.87	3.48		9.06	14.98	11.15			8.36	8.36			7.67	3.48	6.62	2.79	5.57	10.8	5.57	2.79	2.79
Q86UE4	Protein LYRIC OS=Homo sapiens GN=MTDH PE=1 SV=2 - [LYRIC_HUMAN]	50.86	16.67	3.26	1.89	1.89	3.44	8.25	3.95	3.95	2.23		2.58	5.5	2.58	5.5	8.76	6.19	2.23	4.12	10.14
Q9UDW1	Cytochrome b-c1 complex subunit 9 OS=Homo sapiens GN=UQCR10 PE=1 SV=3 - [QCR9_HUMAN]	50.79								12.7	23.81	11.11								26.98	26.98
P49589-3	Isoform 3 of Cysteine--tRNA ligase, cytoplasmic OS=Homo sapiens GN=CARS - [SYCC_HUMAN]	50.78	7.34	4.21	3.85	9.27	5.42	4.69	4.09	2.89	2.53	1.44	1.2	8.42	6.26	3.13	0.96		4.33	4.45	7.58	3.13
P43897	Elongation factor Ts, mitochondrial OS=Homo sapiens GN=TSFM PE=1 SV=2 - [EFTS_HUMAN]	50.77	2.46	3.08	2.77	2.77		4.31	4.31	2.77	8.62			10.77			8.62	4	4	5.23		11.69
P12956	X-ray repair cross-complementing protein 6 OS=Homo sapiens GN=XRCC6 PE=1 SV=2 - [XRCC6_HUMAN]	50.74	10.51	9.52	9.36	13.14	5.58	2.63	2.13	6.57	11	14.29	13.96	6.24	12.64	6.57	7.55	14.94	10.84	15.6	11.82	16.75
H0YI46	Charged multivesicular body protein 4a (Fragment) OS=Homo sapiens GN=CHMP4A PE=4 SV=1 - [H0YI46_HUMAN]	50.73		12.68				6.83	14.63	7.8		4.39	3.41	9.27			5.85	5.85	9.76			4.88
J3QRZ6	MIF4G domain-containing protein (Fragment) OS=Homo sapiens GN=MIF4GD PE=4 SV=1 - [J3QRZ6_HUMAN]	50.73			8.29				6.34		14.63	10.73	10.73
H0YLF3	Beta-2-microglobulin form pI 5.3 (Fragment) OS=Homo sapiens GN=B2M PE=2 SV=1 - [H0YLF3_HUMAN]	50.7							14.08	14.08	14.08			14.08		32.39				18.31
P51812	Ribosomal protein S6 kinase alpha-3 OS=Homo sapiens GN=RPS6KA3 PE=1 SV=1 - [KS6A3_HUMAN]	50.68	2.84	7.3	3.51	4.46	5.95		1.22	4.73	5.27	3.38	2.84	4.32	1.76	2.7	8.78	8.65	6.22	2.03	6.62	1.62
P09669	Cytochrome c oxidase subunit 6C OS=Homo sapiens GN=COX6C PE=1 SV=2 - [COX6C_HUMAN]	50.67		10.67	10.67	12	12	12	29.33								9.33	38.67	38.67			10.67
P62269	40S ribosomal protein S18 OS=Homo sapiens GN=RPS18 PE=1 SV=3 - [RS18_HUMAN]	50.66	3.95	19.08	11.18	10.53	5.92	19.74	13.82	19.08				10.53	5.92	5.26	11.18	11.18	21.71			10.53
Q6DD88	Atlastin-3 OS=Homo sapiens GN=ATL3 PE=1 SV=1 - [ATLA3_HUMAN]	50.65	3.7	9.98	6.84	3.7	4.81	3.88	11.09	5.55	1.66		3.51	6.1	6.84	4.62	9.8	9.98	7.76	5.73	11.65	8.13
Q96C36	Pyrroline-5-carboxylate reductase 2 OS=Homo sapiens GN=PYCR2 PE=1 SV=1 - [P5CR2_HUMAN]	50.63	16.88	10.94	5.63		4.06	4.06	4.06		8.75	11.25	10.31	19.38	2.81	11.25	9.06		3.75	4.06
K7EJH0	Kinetochore protein Spc24 (Fragment) OS=Homo sapiens GN=SPC24 PE=4 SV=1 - [K7EJH0_HUMAN]	50.6	4.76						21.43					4.76					5.95	10.12		8.33
Q9H4G0-2	Isoform 2 of Band 4.1-like protein 1 OS=Homo sapiens GN=EPB41L1 - [E41L1_HUMAN]	50.58	5.78	6.03	5.01	6.03		3.85	9.88	7.19	5.91	4.36	2.82		1.03	1.03	1.54	2.05	2.18	5.65	8.47	5.13
P16615	Sarcoplasmic/endoplasmic reticulum calcium ATPase 2 OS=Homo sapiens GN=ATP2A2 PE=1 SV=1 - [AT2A2_HUMAN]	50.58	12.19	7.58	2.5	1.06	3.65	3.17	3.93	6.62	9.21	8.54	6.91	10.17	3.74	3.74	7.97	3.55	3.93	7.29	7.68	2.78
P24844	Myosin regulatory light polypeptide 9 OS=Homo sapiens GN=MYL9 PE=1 SV=4 - [MYL9_HUMAN]	50.58					6.4		10.47	10.47	10.47	20.93	10.47	5.81	10.47	5.23	5.23	22.67	12.79
J3KS05	Chromobox protein homolog 1 (Fragment) OS=Homo sapiens GN=CBX1 PE=4 SV=1 - [J3KS05_HUMAN]	50.57	32.76											16.09	25.86							27.01
P63167	Dynein light chain 1, cytoplasmic OS=Homo sapiens GN=DYNLL1 PE=1 SV=1 - [DYL1_HUMAN]	50.56	13.48	24.72	24.72	24.72						12.36	12.36		13.48				37.08	24.72		12.36
Q4V328	GRIP1-associated protein 1 OS=Homo sapiens GN=GRIPAP1 PE=1 SV=1 - [GRAP1_HUMAN]	50.54	12.01	5.11		2.5	8.2	3.21	0.95		1.19	3.09	4.52	3.57	2.97	2.73	3.8	4.04	6.06	3.92	2.73	9.16
E7EVA0	Microtubule-associated protein OS=Homo sapiens GN=MAP4 PE=2 SV=1 - [E7EVA0_HUMAN]	50.5	5.27	6.57	4.01	2.83	1.26	2.66	2.48	1.57	2.92	3.61	2.18	6.36	5.35	8.97	9.36	6.27	5.53	6.09	6.75	8.45
Q86YP4-2	Isoform 2 of Transcriptional repressor p66-alpha OS=Homo sapiens GN=GATAD2A - [P66A_HUMAN]	50.49	11.68	3.29						1.81		6.25		1.81	3.95	3.78	8.39	3.45	1.64	3.62	6.25
P55060-3	Isoform 3 of Exportin-2 OS=Homo sapiens GN=CSE1L - [XPO2_HUMAN]	50.48	9.74	2.54	2.54	2.96	6.35	5.71	5.08	6.24	14.81	5.93	8.25	10.05	6.98	5.71	6.35	7.3	8.04	0.95	1.27	1.69
P52943	Cysteine-rich protein 2 OS=Homo sapiens GN=CRIP2 PE=1 SV=1 - [CRIP2_HUMAN]	50.48		7.69		15.38		13.46	6.73		4.81	4.81			7.69					9.13	16.83	16.83
Q9Y2X3	Nucleolar protein 58 OS=Homo sapiens GN=NOP58 PE=1 SV=1 - [NOP58_HUMAN]	50.47	10.96	4.73	7.75	3.21		2.84	8.88	8.51	4.91	13.61	2.84	11.15	2.65	5.67	11.72	16.07	5.29	4.35	4.35
O43390-2	Isoform 2 of Heterogeneous nuclear ribonucleoprotein R OS=Homo sapiens GN=HNRNPR - [HNRPR_HUMAN]	50.47	4.25	10.06	4.72	4.72	1.26	1.73	6.76	6.76	7.86	2.99	4.25	9.91	10.53	9.91	6.6	1.57	7.08	10.69	7.23	8.02
E9PLI6	Probable RNA-binding protein EIF1AD (Fragment) OS=Homo sapiens GN=EIF1AD PE=2 SV=1 - [E9PLI6_HUMAN]	50.44	13.27	7.96			14.16	12.39						13.27							15.04	15.04
Q9BRA0	LSM domain-containing protein 1 OS=Homo sapiens GN=LSMD1 PE=1 SV=1 - [LSMD1_HUMAN]	50.4	7.2			15.2		20	8						7.2
G3V1K3	Paraoxonase 2, isoform CRA_a OS=Homo sapiens GN=PON2 PE=2 SV=1 - [G3V1K3_HUMAN]	50.4		8.8	3.2	4.27	13.07	20.8			4.53	24.27	13.07									8.27
O43390	Heterogeneous nuclear ribonucleoprotein R OS=Homo sapiens GN=HNRNPR PE=1 SV=1 - [HNRPR_HUMAN]	50.39	4.27	10.11	7.58	4.74	1.26	1.74	3.63	3.63	7.9	3	4.27	9.95	10.58	9.95	6.64	4.27	9.79	13.43	7.27	8.06
O15355	Protein phosphatase 1G OS=Homo sapiens GN=PPM1G PE=1 SV=1 - [PPM1G_HUMAN]	50.37		8.61	2.01	8.42	9.89	1.47	3.3	7.51	6.59	4.4	6.78	5.49	2.93	7.33		5.49	8.61	3.48	3.48	1.28
Q9NPJ6	Mediator of RNA polymerase II transcription subunit 4 OS=Homo sapiens GN=MED4 PE=1 SV=1 - [MED4_HUMAN]	50.37					3.7	3.33		3.7	4.81	11.48	6.3		11.11			3.7	7.04	8.89
Q9BQ52	Zinc phosphodiesterase ELAC protein 2 OS=Homo sapiens GN=ELAC2 PE=1 SV=2 - [RNZ2_HUMAN]	50.36	7.99	0.85	3.27	3.15		2.66	4.48	4	2.3	7.63	3.03	5.81	1.69	3.87	3.03	1.69	4	4.72	7.26	2.54
E9PMS6	LIM domain only protein 7 OS=Homo sapiens GN=LMO7 PE=2 SV=1 - [E9PMS6_HUMAN]	50.35	4.63	2.2	1.8	3.06	4.08	5.33	7.14	5.1	3.14	2.67	3.76	6.2	3.92	9.1	5.02	2.43	1.57	3.92	6.82	4.86
Q9UNF1	Melanoma-associated antigen D2 OS=Homo sapiens GN=MAGED2 PE=1 SV=2 - [MAGD2_HUMAN]	50.33	13.53	1.82	4.46	2.64	3.96		7.1	4.62	5.78	11.06	11.06	8.91		6.77		6.44	3.63		1.16
O75312	Zinc finger protein ZPR1 OS=Homo sapiens GN=ZNF259 PE=1 SV=1 - [ZPR1_HUMAN]	50.33		4.14	3.49	3.49	9.15	5.66	8.06					12.42		4.79	2.83	3.27	5.66		1.74
O43684-2	Isoform 2 of Mitotic checkpoint protein BUB3 OS=Homo sapiens GN=BUB3 - [BUB3_HUMAN]	50.31	3.07		3.37	3.37	8.59	8.59	11.04	11.04	6.44	10.12		4.29		10.43	8.28	6.13	3.99	10.74		5.83
J3QQT2	60S ribosomal protein L17 (Fragment) OS=Homo sapiens GN=RPL17 PE=3 SV=1 - [J3QQT2_HUMAN]	50.29	4.09	8.77	8.77	5.85	16.37	16.37	10.53	16.96			5.26		5.26			8.19	8.19	23.98	15.79	14.62
F5H6I7	Atlastin-3 OS=Homo sapiens GN=ATL3 PE=2 SV=1 - [F5H6I7_HUMAN]	50.29	3.82	10.33	10.13	3.82	3.82		7.46	1.72	1.72		3.63	6.31	7.07	4.78	10.13	10.33	8.03	5.93	12.05	8.41
Q5JVF3-3	Isoform 3 of PCI domain-containing protein 2 OS=Homo sapiens GN=PCID2 - [PCID2_HUMAN]	50.27		3.46	2.39	1.86		3.99		7.18	4.26	9.84	3.19	5.05		2.66	2.93	9.84	7.98	4.79	5.05	8.51
Q10471	Polypeptide N-acetylgalactosaminyltransferase 2 OS=Homo sapiens GN=GALNT2 PE=1 SV=1 - [GALT2_HUMAN]	50.26	2.63	2.8	5.95	6.65	1.93	1.93	6.83	6.65	1.93		3.5	8.23	6.65	8.76	6.3	3.85	1.75	1.75	1.93	1.75
Q8WXI9	Transcriptional repressor p66-beta OS=Homo sapiens GN=GATAD2B PE=1 SV=1 - [P66B_HUMAN]	50.25	1.85		3.37			6.58	2.36	5.9	8.26	2.7	2.7	5.73	1.85		2.36	8.6	5.4	5.4	1.18
E7ETZ4	Basic leucine zipper and W2 domain-containing protein 2 (Fragment) OS=Homo sapiens GN=BZW2 PE=2 SV=1 - [E7ETZ4_HUMAN]	50.25	4.66	2.7	4.9	8.58		3.92	2.21	8.82	6.37	13.48	4.9	7.11		4.41	6.62	6.13	2.45	1.72		2.7
P61758	Prefoldin subunit 3 OS=Homo sapiens GN=VBP1 PE=1 SV=3 - [PFD3_HUMAN]	50.25	5.08	6.6	6.6			9.64	9.64	10.15		4.57			6.09		4.57	4.06		6.09		18.78
O14980	Exportin-1 OS=Homo sapiens GN=XPO1 PE=1 SV=1 - [XPO1_HUMAN]	50.23	4.58	8.4	5.04	4.76	5.42	8.78	7.84	6.16	11.11	8.12	4.76	3.17	5.32	4.2	5.42	6.91	6.07	3.36	2.8	7.56
Q13242	Serine/arginine-rich splicing factor 9 OS=Homo sapiens GN=SRSF9 PE=1 SV=1 - [SRSF9_HUMAN]	50.23	12.67		4.52	4.52			6.33			3.17		12.67	12.67	9.95	4.52	4.52	4.52	4.98	8.6	7.69
Q4G0N4	NAD kinase domain-containing protein 1, mitochondrial OS=Homo sapiens GN=NADKD1 PE=1 SV=2 - [NAKD1_HUMAN]	50.23	2.94		5.43	3.17		9.05	9.05		4.75	9.28	9.05	2.94	9.5		7.47	3.85	2.26	9.28	5.43
E9PRI4	Ribosomal protein S6 kinase OS=Homo sapiens GN=RPS6KA1 PE=2 SV=1 - [E9PRI4_HUMAN]	50.21	1.39	10.01	5.15	4.03	6.82	2.78	6.26	4.73	3.2	1.53		1.67		6.12	7.37	8.62	4.87	0.97	4.59	5.29
Q9BU76	Multiple myeloma tumor-associated protein 2 OS=Homo sapiens GN=MMTAG2 PE=1 SV=1 - [MMTA2_HUMAN]	50.19	3.04	11.41		6.08					15.21	3.8	5.7			5.7	5.7		5.32		8.37	5.32
H0Y8G5	Heterogeneous nuclear ribonucleoprotein D0 (Fragment) OS=Homo sapiens GN=HNRNPD PE=2 SV=1 - [H0Y8G5_HUMAN]	50.19	3.45	10.34	8.81	19.16	8.43	22.99		8.81	24.52	21.84	12.64	9.58	11.11	4.6		2.68	10.34	12.64	8.43	3.83
A8MZI2	Sorting and assembly machinery component 50 homolog OS=Homo sapiens GN=SAMM50 PE=2 SV=2 - [A8MZI2_HUMAN]	50.19		6.18				6.56		3.47			4.63	6.56	4.63	3.86	7.72			10.04	14.67	6.18
Q96IY1	Kinetochore-associated protein NSL1 homolog OS=Homo sapiens GN=NSL1 PE=1 SV=3 - [NSL1_HUMAN]	50.18	5.69	2.85				13.52	11.39	3.91	4.63	6.05			5.69			4.27		6.05
Q8N1F7	Nuclear pore complex protein Nup93 OS=Homo sapiens GN=NUP93 PE=1 SV=2 - [NUP93_HUMAN]	50.18	3.17	5.13	2.08	2.44	5.86	4.27	5.01	6.47	5.25			4.52	3.17	3.54	6.72		3.66	4.76	3.3	7.69
Q13151	Heterogeneous nuclear ribonucleoprotein A0 OS=Homo sapiens GN=HNRNPA0 PE=1 SV=1 - [ROA0_HUMAN]	50.16	6.89	2.3			2.3	14.75	12.46	16.72	15.74	21.64	18.69	13.44	13.11	2.62	2.62	2.62	7.87	6.56	2.62	2.62
Q9NTJ3	Structural maintenance of chromosomes protein 4 OS=Homo sapiens GN=SMC4 PE=1 SV=2 - [SMC4_HUMAN]	50.16	4.04	2.8	2.02	1.24	1.79	6.44	8.85	8.46	7.14	4.43	5.43	6.75	4.89	7.53	6.91	1.79	1.09	0.7	8	1.63
P15170-2	Isoform 2 of Eukaryotic peptide chain release factor GTP-binding subunit ERF3A OS=Homo sapiens GN=GSPT1 - [ERF3A_HUMAN]	50.16	2.83	11.95	16.19	12.58	11.16	9.28	2.67	4.56	3.93	2.67		10.85	4.56	8.96	11.32	5.35	7.7	6.92	8.65	6.92
Q13867	Bleomycin hydrolase OS=Homo sapiens GN=BLMH PE=1 SV=1 - [BLMH_HUMAN]	50.11	10.77			3.52	10.55	5.27	2.86		8.35	3.08		13.63	5.71	5.27	9.67	7.03	4.4	3.08	7.03	4.18
P23258	Tubulin gamma-1 chain OS=Homo sapiens GN=TUBG1 PE=1 SV=2 - [TBG1_HUMAN]	50.11	2.44	10.42	14.63	10.2	8.87	4.66	5.76		4.66	1.77	2	6.43	2	5.32			4.21	3.77		17.74
Q9NV06	DDB1- and CUL4-associated factor 13 OS=Homo sapiens GN=DCAF13 PE=1 SV=2 - [DCA13_HUMAN]	50.11	2.47		5.17	5.62	2.92	5.84		4.72	2.92		1.8		2.47	2.02	2.25	6.29	4.27	8.31	4.04	4.94
J3KQU4	TOM1-like protein 1 OS=Homo sapiens GN=TOM1L1 PE=4 SV=1 - [J3KQU4_HUMAN]	50.11		2.8		1.72	1.29		9.25			2.8	6.24	6.67	11.4	11.18		5.16	4.09
P61221	ATP-binding cassette sub-family E member 1 OS=Homo sapiens GN=ABCE1 PE=1 SV=1 - [ABCE1_HUMAN]	50.08	3.34	3.67	2.84	7.01	6.84	6.18	3.01	6.01	8.35	10.18	1.67	3.34		7.68	2.67	2.67		5.01	8.01	3.17
Q01081	Splicing factor U2AF 35 kDa subunit OS=Homo sapiens GN=U2AF1 PE=1 SV=3 - [U2AF1_HUMAN]	50	5.83	14.17	14.17		3.33			10			7.5	9.58	11.67	5	5	5.42	5.42		9.17	9.17
Q01105	Protein SET OS=Homo sapiens GN=SET PE=1 SV=3 - [SET_HUMAN]	50	7.59	23.79	19.31	7.24		18.62	7.24	7.24	4.83	4.83	12.41	7.59	30			9.31	8.97	18.62	4.48	17.93
Q07955	Serine/arginine-rich splicing factor 1 OS=Homo sapiens GN=SRSF1 PE=1 SV=2 - [SRSF1_HUMAN]	50	3.63	15.32	18.95	8.06	4.44	4.44	4.44	14.11	20.16	18.55	20.16	13.31	11.29	12.1	13.71	8.06	8.06	7.66	4.44	15.32
P27635	60S ribosomal protein L10 OS=Homo sapiens GN=RPL10 PE=1 SV=4 - [RL10_HUMAN]	50	8.41		18.69	5.14	5.14	27.57	35.05	27.57	28.5	34.11	29.91	6.54	15.89	13.55	4.21	25.7	6.54	25.23	9.81	14.95
Q01081-2	Isoform 2 of Splicing factor U2AF 35 kDa subunit OS=Homo sapiens GN=U2AF1 - [U2AF1_HUMAN]	50	5.83	3.33	3.33		3.33			10			7.5	9.58	11.67	5	5				25.42	9.17
B4DJP7	Small nuclear ribonucleoprotein Sm D3 OS=Homo sapiens GN=SNRPD3 PE=2 SV=1 - [B4DJP7_HUMAN]	50	16.67			7.5	16.67	7.5	7.5		7.5			16.67		17.5	25.83	25.83	8.33
J3KTA4	Probable ATP-dependent RNA helicase DDX5 OS=Homo sapiens GN=DDX5 PE=3 SV=1 - [J3KTA4_HUMAN]	50	5.21	3.26	3.75	5.54		1.95	3.42	3.91	10.42	8.31	5.7	7.65	9.45	8.96	4.72	3.26	4.89	4.89	3.42	4.4
P60983	Glia maturation factor beta OS=Homo sapiens GN=GMFB PE=1 SV=2 - [GMFB_HUMAN]	50	7.04	16.2	16.9				6.34	6.34	7.75	11.27		7.04					7.75			16.2
Q9Y2R9	28S ribosomal protein S7, mitochondrial OS=Homo sapiens GN=MRPS7 PE=1 SV=2 - [RT07_HUMAN]	50	10.74				6.61	11.16	8.68		4.55			5.37			25.21	10.74		7.85		4.55
Q14012	Calcium/calmodulin-dependent protein kinase type 1 OS=Homo sapiens GN=CAMK1 PE=1 SV=1 - [KCC1A_HUMAN]	50		2.97				5.14	2.7		6.76	4.59		7.57		4.86	4.86	4.86				16.49
B4DWW1	ADP-ribosylation factor-like protein 1 OS=Homo sapiens GN=ARL1 PE=2 SV=1 - [B4DWW1_HUMAN]	50		13.41	13.41	5.49		11.59					8.54		8.54			6.71	6.71	12.2	12.2	13.41
B7Z6B8	2,4-dienoyl-CoA reductase, mitochondrial OS=Homo sapiens GN=DECR1 PE=2 SV=1 - [B7Z6B8_HUMAN]	50		15.03	6.75		3.99	3.99			8.59	8.59	6.75			6.75		12.27			2.15
E9PJ38	Receptor-binding cancer antigen-expressed on SiSo cells (Fragment) OS=Homo sapiens GN=EBAG9 PE=2 SV=1 - [E9PJ38_HUMAN]	50		25.64					24.36	24.36		24.36									25.64	25.64
J3KMY5	Epididymal secretory protein E1 OS=Homo sapiens GN=NPC2 PE=4 SV=1 - [J3KMY5_HUMAN]	50		15.54		4.73					6.08					6.08	6.08				10.81	6.76
P36405	ADP-ribosylation factor-like protein 3 OS=Homo sapiens GN=ARL3 PE=1 SV=2 - [ARL3_HUMAN]	50						18.68	18.68	15.38	8.79	21.43	5.49	9.34		9.34			10.44		6.04
P63173	60S ribosomal protein L38 OS=Homo sapiens GN=RPL38 PE=1 SV=2 - [RL38_HUMAN]	50							17.14	17.14		14.29	14.29		17.14		32.86	32.86	14.29	32.86	14.29
O95336	6-phosphogluconolactonase OS=Homo sapiens GN=PGLS PE=1 SV=2 - [6PGL_HUMAN]	50							4.65		7.36	17.44	8.14	4.26	8.14	10.47	6.2			7.75	9.3	5.81
Q0VDF9	Heat shock 70 kDa protein 14 OS=Homo sapiens GN=HSPA14 PE=1 SV=1 - [HSP7E_HUMAN]	49.9	1.77		1.77	2.36	9.63	1.57	7.86		5.3		4.32	8.25		6.09	4.91	4.91	1.77		2.16
Q2TAY7	WD40 repeat-containing protein SMU1 OS=Homo sapiens GN=SMU1 PE=1 SV=2 - [SMU1_HUMAN]	49.9	2.92	3.7	6.04	3.51		2.53	5.07	3.51	5.46	4.09	3.9	11.31	3.9	8.97	9.36	2.53		3.9		3.31
Q14141-2	Isoform I of Septin-6 OS=Homo sapiens GN=SEPT6 - [SEPT6_HUMAN]	49.88		13.11	2.11		2.34	4.22	2.34	18.27	4.68	4.68	1.64		3.51	8.43	4.92	7.49	11.24	13.35	10.54	2.11
Q8N806	Putative E3 ubiquitin-protein ligase UBR7 OS=Homo sapiens GN=UBR7 PE=1 SV=2 - [UBR7_HUMAN]	49.88			2.12	2.12			2.12		9.88	5.18		8.94	3.06	6.35	3.29	7.53	2.12	7.53	3.29	3.06
Q92643	GPI-anchor transamidase OS=Homo sapiens GN=PIGK PE=1 SV=2 - [GPI8_HUMAN]	49.87		3.04					2.53		12.66	9.37	4.05	3.8		5.06	2.53	2.53	2.78		5.57	3.04
J3QRD1	Fatty aldehyde dehydrogenase OS=Homo sapiens GN=ALDH3A2 PE=3 SV=1 - [J3QRD1_HUMAN]	49.87		2.04	3.05	3.05	6.11	6.62	6.62	5.09	3.05	10.18	9.16	2.04		6.36	10.69	2.29		3.82
Q9BQG0	Myb-binding protein 1A OS=Homo sapiens GN=MYBBP1A PE=1 SV=2 - [MBB1A_HUMAN]	49.85	3.31	7.83	9.26	4.59	3.69	5.87	6.1	7.23	10.24	11.97	5.72	2.18	4.67	2.11	0.83	3.09	5.72	6.25	6.17	5.72
Q96BP3	Peptidylprolyl isomerase domain and WD repeat-containing protein 1 OS=Homo sapiens GN=PPWD1 PE=1 SV=1 - [PPWD1_HUMAN]	49.85	2.48	3.41	6.66	1.55	2.17	1.08	3.56	3.56		2.63	4.95	8.82	6.97	1.7	4.49	2.94	1.55			5.11
Q15599	Na(+)/H(+) exchange regulatory cofactor NHE-RF2 OS=Homo sapiens GN=SLC9A3R2 PE=1 SV=2 - [NHRF2_HUMAN]	49.85	3.86	3.26	9.5	5.64	10.09		3.56		3.86	4.15	4.15			8.01	5.04	2.67	3.86			2.67
Q86Y56	HEAT repeat-containing protein 2 OS=Homo sapiens GN=HEATR2 PE=1 SV=4 - [HEAT2_HUMAN]	49.82	2.11	8.3	3.63		3.39	5.38	5.38	4.91	5.03	1.29	4.56	2.57	1.87	4.8	2.22		6.67		1.99	1.99
O00159-2	Isoform 2 of Unconventional myosin-Ic OS=Homo sapiens GN=MYO1C - [MYO1C_HUMAN]	49.81	7.78	3.31	5.25	3.7	2.04	3.5	4.86	2.04	3.79	5.25	3.31	7.78	4.47	3.21	8.85	2.63	2.33	2.33	6.32	5.45
O43615	Mitochondrial import inner membrane translocase subunit TIM44 OS=Homo sapiens GN=TIMM44 PE=1 SV=2 - [TIM44_HUMAN]	49.78	5.31	13.05	7.96	2.43	4.87	4.42	3.54	3.54	1.99		2.21	5.75	7.08	2.65	6.64	5.75	7.08	11.06	10.18	13.5
Q15645	Pachytene checkpoint protein 2 homolog OS=Homo sapiens GN=TRIP13 PE=1 SV=2 - [PCH2_HUMAN]	49.77	6.25	3.24	1.85		1.62	9.26	1.85	3.7	4.4	7.41	3.01	11.11	2.08	8.56	2.31	3.47	3.47	3.47		5.32
P61020	Ras-related protein Rab-5B OS=Homo sapiens GN=RAB5B PE=1 SV=1 - [RAB5B_HUMAN]	49.77	6.51	19.53	10.7	5.58			5.12	5.12	5.12				6.51						11.16	16.28
P34896-2	Isoform 2 of Serine hydroxymethyltransferase, cytosolic OS=Homo sapiens GN=SHMT1 - [GLYC_HUMAN]	49.77	4.05			6.53	8.78		1.58	6.08	4.5	8.33	13.06		13.29		2.03	5.18	5.18	5.86	2.7	2.25
Q9GZP4	PITH domain-containing protein 1 OS=Homo sapiens GN=PITHD1 PE=1 SV=1 - [PITH1_HUMAN]	49.76	3.79				3.32	5.21	8.06		10.43	8.53		9			9.95
Q86VP6	Cullin-associated NEDD8-dissociated protein 1 OS=Homo sapiens GN=CAND1 PE=1 SV=2 - [CAND1_HUMAN]	49.76	4.8	10.33	8.29	2.76	3.74	7.32	5.37	4.07	8.54	3.5	2.68	9.51	2.76	7.32	2.93	3.98	3.74	3.25	6.02	6.75
Q9HBH0	Rho-related GTP-binding protein RhoF OS=Homo sapiens GN=RHOF PE=2 SV=1 - [RHOF_HUMAN]	49.76						9.48		8.06	5.21	5.21	4.74		12.8		4.74	4.74		4.74	4.74
Q8NBT2	Kinetochore protein Spc24 OS=Homo sapiens GN=SPC24 PE=1 SV=2 - [SPC24_HUMAN]	49.75				10.66			18.27										5.08	8.63		7.11
Q16531	DNA damage-binding protein 1 OS=Homo sapiens GN=DDB1 PE=1 SV=1 - [DDB1_HUMAN]	49.74	6.93	8.33	3.6	3.33	1.84	2.46	4.3	5.18	7.54	3.07	3.95	5.35	12.72	5.26	7.37	6.14	1.67	2.54	2.46	4.39
Q3LXA3	Bifunctional ATP-dependent dihydroxyacetone kinase/FAD-AMP lyase (cyclizing) OS=Homo sapiens GN=DAK PE=1 SV=2 - [DHAK_HUMAN]	49.74	2.96				2.96	4.52		3.65	3.3	7.13	9.04	5.57	2.09	6.43		3.65	9.57	3.65	6.61	2.78
P37235	Hippocalcin-like protein 1 OS=Homo sapiens GN=HPCAL1 PE=1 SV=3 - [HPCL1_HUMAN]	49.74						7.77	4.15	4.15	6.22	13.99	14.51	6.74	21.76	6.74	15.54	11.4	7.25	6.22	14.51	14.51
Q13123	Protein Red OS=Homo sapiens GN=IK PE=1 SV=3 - [RED_HUMAN]	49.73	11.49			1.26	4.13	7.54	2.51		6.82	3.05	2.87	10.23	3.77	9.52	10.59			4.49	2.15
Q15642-2	Isoform 2 of Cdc42-interacting protein 4 OS=Homo sapiens GN=TRIP10 - [CIP4_HUMAN]	49.72	4.22	2.02	2.02	4.59	4.59	4.59	5.5	3.85	6.61	9.91		4.95	6.06	6.79		3.85	4.4			2.02
Q9Y450	HBS1-like protein OS=Homo sapiens GN=HBS1L PE=1 SV=1 - [HBS1L_HUMAN]	49.71	5.7		3.51		1.61		3.22	4.97	1.9	11.84	5.7		6.43	6.29	10.53	6.73	7.6	2.49		2.34
Q70UQ0	Inhibitor of nuclear factor kappa-B kinase-interacting protein OS=Homo sapiens GN=IKBIP PE=1 SV=1 - [IKIP_HUMAN]	49.71		2.57			3.43		6.29	9.14	2	5.71	2.29	5.14		5.43	5.14	9.14	6.57	3.14		8.86
O00116	Alkyldihydroxyacetonephosphate synthase, peroxisomal OS=Homo sapiens GN=AGPS PE=1 SV=1 - [ADAS_HUMAN]	49.7	2.58		3.8	1.98		2.43	2.13	2.13	8.05	10.64	9.12	3.5	10.79	1.37	3.65	13.83	5.78	1.82	5.32	5.78
P78527	DNA-dependent protein kinase catalytic subunit OS=Homo sapiens GN=PRKDC PE=1 SV=3 - [PRKDC_HUMAN]	49.69	4.46	4.55	3.27	4.36	5.38	6.93	5.96	5.18	10.47	8.48	6.76	3.37	8.16	5.94	5.18	5.01	3.92	7.66	6.81	4.92
P51665	26S proteasome non-ATPase regulatory subunit 7 OS=Homo sapiens GN=PSMD7 PE=1 SV=2 - [PSD7_HUMAN]	49.69		7.41	7.41	8.64	7.1	3.09		3.09	11.73	6.48	7.41		7.41	15.12	12.04	12.04		3.7	7.72	7.41
Q9NQG5	Regulation of nuclear pre-mRNA domain-containing protein 1B OS=Homo sapiens GN=RPRD1B PE=1 SV=1 - [RPR1B_HUMAN]	49.69			3.07		7.67	11.96	9.51	9.51			3.37	9.82		4.91		2.45	2.45	14.11	3.68
Q8TBC4	NEDD8-activating enzyme E1 catalytic subunit OS=Homo sapiens GN=UBA3 PE=1 SV=2 - [UBA3_HUMAN]	49.68		4.97	8.64	4.97	1.94	5.18			6.48	7.56	5.18			4.32	4.32		9.94	7.99	8.86	5.18
M0R3D6	60S ribosomal protein L18a (Fragment) OS=Homo sapiens GN=RPL18A PE=4 SV=1 - [M0R3D6_HUMAN]	49.65	12.77	23.4	19.86	9.22	14.18				7.09		7.8	5.67	23.4	18.44	15.6		9.93	7.09	17.02	23.4
P62266	40S ribosomal protein S23 OS=Homo sapiens GN=RPS23 PE=1 SV=3 - [RS23_HUMAN]	49.65		7.69	7.69	8.39		8.39	41.26	35.66	27.27	6.29	6.29								7.69
Q14247	Src substrate cortactin OS=Homo sapiens GN=CTTN PE=1 SV=2 - [SRC8_HUMAN]	49.64	5.45	5.09	6.18	6.55		1.27	11.45	9.45		3.45	4.55	9.09	2	8.18	4.55			4.73	4.91	3.09
E9PF19	Transducin beta-like protein 2 OS=Homo sapiens GN=TBL2 PE=2 SV=1 - [E9PF19_HUMAN]	49.64	6.57	10.71	7.79	5.6	7.54	3.89		1.95	6.33		6.81	4.87	3.89	3.16	4.14	6.08	2.19	4.38	4.38	4.87
Q99459	Cell division cycle 5-like protein OS=Homo sapiens GN=CDC5L PE=1 SV=2 - [CDC5L_HUMAN]	49.63	10.97	1.62	1	4.61	6.11	11.85	4.99	7.48	5.61	2.24	3.99	3.49	5.61	1.87	0.87	9.73	3.74	4.61	2.24	2.74
Q9NUG6	p53 and DNA damage-regulated protein 1 OS=Homo sapiens GN=PDRG1 PE=2 SV=2 - [PDRG1_HUMAN]	49.62	21.05											24.81			12.78		16.54	9.77
Q9BPZ3	Polyadenylate-binding protein-interacting protein 2 OS=Homo sapiens GN=PAIP2 PE=1 SV=1 - [PAIP2_HUMAN]	49.61		11.02			23.62	14.96														11.02
P33316	Deoxyuridine 5'-triphosphate nucleotidohydrolase, mitochondrial OS=Homo sapiens GN=DUT PE=1 SV=4 - [DUT_HUMAN]	49.6	14.68	5.95	5.95		4.37					4.76	16.27	7.14	11.51	4.76			6.75	23.02	12.3
Q16864	V-type proton ATPase subunit F OS=Homo sapiens GN=ATP6V1F PE=1 SV=2 - [VATF_HUMAN]	49.58								10.08						30.25				7.56	15.97	25.21
Q96RS6	NudC domain-containing protein 1 OS=Homo sapiens GN=NUDCD1 PE=1 SV=2 - [NUDC1_HUMAN]	49.57	2.4	6.17	6.52				6.86	3.6	6.52	6.35		2.4	4.29	1.89	3.43	10.63	6.69		5.49	9.61
Q9Y4E8	Ubiquitin carboxyl-terminal hydrolase 15 OS=Homo sapiens GN=USP15 PE=1 SV=3 - [UBP15_HUMAN]	49.54	6.83	2.45	5.91	3.26		5.3	3.47	6.01	6.83	3.98	3.26	5.5	4.49	0.92	2.45	6.12	2.24	0.71	4.49	1.02
O75643	U5 small nuclear ribonucleoprotein 200 kDa helicase OS=Homo sapiens GN=SNRNP200 PE=1 SV=2 - [U520_HUMAN]	49.53	4.96	6.69	4.07	2.48	2.86	3.18	5.34	4.12	5.01	2.34	4.92	3.28	6.27	3.6	7.3	4.63	6.18	5.24	6.18	3.98
P49023-4	Isoform 4 of Paxillin OS=Homo sapiens GN=PXN - [PAXI_HUMAN]	49.53				2.36		6.37	10.38	12.03	11.08	4.48				3.07		9.2	14.15	8.96	3.54
P19388	DNA-directed RNA polymerases I, II, and III subunit RPABC1 OS=Homo sapiens GN=POLR2E PE=1 SV=4 - [RPAB1_HUMAN]	49.52	3.81		12.86	8.1	4.29	4.29	4.29			6.67	15.71	3.81	4.76	4.76
Q08945	FACT complex subunit SSRP1 OS=Homo sapiens GN=SSRP1 PE=1 SV=1 - [SSRP1_HUMAN]	49.51	4.51	4.94	4.51	1.41	1.83	2.96	11.28	9.59	2.96	3.67	2.12	2.4	5.92	8.74	10.3	10.3	6.06	3.53	1.83	5.36
Q9UHR4	Brain-specific angiogenesis inhibitor 1-associated protein 2-like protein 1 OS=Homo sapiens GN=BAIAP2L1 PE=1 SV=2 - [BI2L1_HUMAN]	49.51	2.15	5.09	3.72	2.74	4.89		2.15	1.96	6.07	2.35	5.09	5.28	5.09		8.02	8.02	6.07	2.15	5.68	5.87
Q6NZI2	Polymerase I and transcript release factor OS=Homo sapiens GN=PTRF PE=1 SV=1 - [PTRF_HUMAN]	49.49	6.41	4.62	4.62	10.77	10.51			8.21				2.31		9.23	3.33	12.05		7.69	12.31
H0YDU8	Serine/threonine-protein phosphatase (Fragment) OS=Homo sapiens GN=PPP5C PE=3 SV=1 - [H0YDU8_HUMAN]	49.48	3.71	2.47	5.36			2.68	6.19	4.12	7.84	10.93	2.68		2.47	13.2	6.6	3.3	7.84	5.36	7.63	4.95
F5H6E2	Unconventional myosin-Ic OS=Homo sapiens GN=MYO1C PE=2 SV=1 - [F5H6E2_HUMAN]	49.47	7.7	3.27	5.2	3.66	2.02	3.46	4.81	2.02	3.75	6.16	3.27	7.7	4.43	3.18	8.76	2.6	2.31	2.31	5.49	5.39
J3KN67	Tropomyosin alpha-3 chain OS=Homo sapiens GN=TPM3 PE=3 SV=1 - [J3KN67_HUMAN]	49.47	2.81	4.91	3.51	12.63	7.02	16.49	9.82	9.82	3.51	9.82	8.77			3.16	10.88	8.77	11.23	5.61	3.51	5.96
Q9NVJ2	ADP-ribosylation factor-like protein 8B OS=Homo sapiens GN=ARL8B PE=1 SV=1 - [ARL8B_HUMAN]	49.46				21.51	8.6	3.76	4.84	4.84	4.84	4.84			9.14		5.38	5.38			12.37
Q9BRG1	Vacuolar protein-sorting-associated protein 25 OS=Homo sapiens GN=VPS25 PE=1 SV=1 - [VPS25_HUMAN]	49.43	8.52	9.09			5.11	12.5			5.68	13.64			8.52		10.8			8.52	4.55	15.34
Q96CW1-2	Isoform 2 of AP-2 complex subunit mu OS=Homo sapiens GN=AP2M1 - [AP2M1_HUMAN]	49.42	2.31	7.85	3.46			3.46	2.54	2.54	7.16	2.54	2.54	1.62	2.54	5.31	13.63	3.7	8.08		12.01	5.31
Q9GZP8-2	Isoform 2 of Immortalization up-regulated protein OS=Homo sapiens GN=IMUP - [IMUP_HUMAN]	49.41										17.65	17.65					31.76	31.76
Q9BSH5	Haloacid dehalogenase-like hydrolase domain-containing protein 3 OS=Homo sapiens GN=HDHD3 PE=1 SV=1 - [HDHD3_HUMAN]	49.4		7.97	4.38	9.96	2.79			7.17			2.79						14.34	4.78
O75821	Eukaryotic translation initiation factor 3 subunit G OS=Homo sapiens GN=EIF3G PE=1 SV=2 - [EIF3G_HUMAN]	49.38	9.06	6.56	3.75	10.31	7.19								7.19	5	8.13	14.06		21.25	6.88	8.75
O75935-3	Isoform 3 of Dynactin subunit 3 OS=Homo sapiens GN=DCTN3 - [DCTN3_HUMAN]	49.37			6.96	6.96					5.06				14.56			12.66		5.06	5.06	5.06
J3KMX2	SWI/SNF-related matrix-associated actin-dependent regulator of chromatin subfamily D member 2 OS=Homo sapiens GN=SMARCD2 PE=4 SV=1 - [J3KMX2_HUMAN]	49.34	7.68	4.82	4.82	2.41		3.07		1.54	3.95		1.97	2.85	5.48	3.07			6.36	6.58	5.04
Q8WZ82	Ovarian cancer-associated gene 2 protein OS=Homo sapiens GN=OVCA2 PE=1 SV=1 - [OVCA2_HUMAN]	49.34							13.22		4.85			5.73		5.73	15.86	6.61				9.69
B4DDF4	Calponin-2 OS=Homo sapiens GN=CNN2 PE=2 SV=1 - [B4DDF4_HUMAN]	49.33	3.69	4.36		4.7		3.69	3.69	8.05	8.05		6.71	3.69	3.69		15.77	13.76	2.68	3.36		4.36
P51659	Peroxisomal multifunctional enzyme type 2 OS=Homo sapiens GN=HSD17B4 PE=1 SV=3 - [DHB4_HUMAN]	49.32	1.22	3.8	3.4	2.04	3.67	5.3	9.92	9.51	5.3	6.66	11.55	2.99	12.09	5.84	5.84	3.26		3.8	4.89	2.85
Q13190	Syntaxin-5 OS=Homo sapiens GN=STX5 PE=1 SV=2 - [STX5_HUMAN]	49.3	7.89		3.38	2.54	5.35	9.01	2.82	6.76	5.92	5.92					3.38	3.38	2.54	7.61	10.42
Q96T51	RUN and FYVE domain-containing protein 1 OS=Homo sapiens GN=RUFY1 PE=1 SV=2 - [RUFY1_HUMAN]	49.29	1.55		4.66	3.67	2.97	6.07	1.13		9.18	5.65	1.98		3.67	4.66	4.94	2.97	1.27		3.53
Q9BSC4	Nucleolar protein 10 OS=Homo sapiens GN=NOL10 PE=1 SV=1 - [NOL10_HUMAN]	49.27	5.81	3.92	1.45		4.94	9.16	8.43		3.63	6.1	4.65	1.16	3.05	2.62	3.63	4.8			2.47
P50336	Protoporphyrinogen oxidase OS=Homo sapiens GN=PPOX PE=1 SV=1 - [PPOX_HUMAN]	49.27		4.82	2.31					5.66	12.37	21.17	13.84				3.35			4.82
P18615	Negative elongation factor E OS=Homo sapiens GN=NELFE PE=1 SV=3 - [NELFE_HUMAN]	49.21	3.42				4.74	4.47	4.74	4.74	10.53		8.16		2.37	4.74	4.74		5.79		2.89	4.74
P60953	Cell division control protein 42 homolog OS=Homo sapiens GN=CDC42 PE=1 SV=2 - [CDC42_HUMAN]	49.21	12.57	18.32	5.76				16.75		6.81		6.81	14.66	12.57	14.66	14.14	8.9	14.14	19.9	15.71	6.81
Q99622	Protein C10 OS=Homo sapiens GN=C12orf57 PE=1 SV=1 - [C10_HUMAN]	49.21				11.9					26.98										10.32	10.32
Q9Y305	Acyl-coenzyme A thioesterase 9, mitochondrial OS=Homo sapiens GN=ACOT9 PE=1 SV=2 - [ACOT9_HUMAN]	49.2	2.05	2.96	5.69	6.61	2.51	2.96	2.96	1.82	4.33	4.78	6.83	2.05		6.83	5.47	2.28	8.43	2.05	2.51
Q96C19	EF-hand domain-containing protein D2 OS=Homo sapiens GN=EFHD2 PE=1 SV=1 - [EFHD2_HUMAN]	49.17	9.58	3.75		4.58	4.58		3.75	15	6.25	10.42	4.17	9.58	13.33			7.08	5.42	4.17	10.42	11.25
P46109	Crk-like protein OS=Homo sapiens GN=CRKL PE=1 SV=1 - [CRKL_HUMAN]	49.17		4.95	2.97	3.3	9.57	5.61	14.19						10.56	9.9	5.94
Q86XP3	ATP-dependent RNA helicase DDX42 OS=Homo sapiens GN=DDX42 PE=1 SV=1 - [DDX42_HUMAN]	49.15	1.39	5.44	10.02	3.2	2.77	2.35		1.28			3.84	6.18	5.97	6.5	5.44	7.46	4.05	6.82	5.86	3.41
Q9UNK0	Syntaxin-8 OS=Homo sapiens GN=STX8 PE=1 SV=2 - [STX8_HUMAN]	49.15	9.32	12.71			2.97			7.63				4.24						6.36	5.93
P08754	Guanine nucleotide-binding protein G(k) subunit alpha OS=Homo sapiens GN=GNAI3 PE=1 SV=3 - [GNAI3_HUMAN]	49.15	13.28			3.39	9.6	3.39	6.5	9.04	6.5	6.5		16.1	5.37	4.24			8.76	4.52		2.82
Q13541	Eukaryotic translation initiation factor 4E-binding protein 1 OS=Homo sapiens GN=EIF4EBP1 PE=1 SV=3 - [4EBP1_HUMAN]	49.15								22.03	22.03			10.17		20.34		5.93		11.02
J3QR04	Transcription elongation factor SPT4 OS=Homo sapiens GN=SUPT4H1 PE=4 SV=1 - [J3QR04_HUMAN]	49.15														15.25	33.9
P41214	Eukaryotic translation initiation factor 2D OS=Homo sapiens GN=EIF2D PE=1 SV=3 - [EIF2D_HUMAN]	49.14	5.31	6.85		2.91	10.62	6.16	3.6	5.99	4.28	2.4	2.4			3.25	5.65	1.88	1.54	1.54		3.42
H3BPB8	Mannose-6-phosphate isomerase OS=Homo sapiens GN=MPI PE=2 SV=1 - [H3BPB8_HUMAN]	49.13			4.71	12.66	6.95		4.47	8.19	3.97	10.67	6.7	2.98		8.68	5.71		8.93	3.97	3.97
Q00688	Peptidyl-prolyl cis-trans isomerase FKBP3 OS=Homo sapiens GN=FKBP3 PE=1 SV=1 - [FKBP3_HUMAN]	49.11	6.25				12.5	8.48	3.13	13.84	20.54	6.7	6.7			3.57				4.91	13.84	4.91
H0YGK4	Uncharacterized protein C12orf43 (Fragment) OS=Homo sapiens GN=C12orf43 PE=4 SV=1 - [H0YGK4_HUMAN]	49.07		16.67		7.41	7.41												10.19		10.65	4.17
P11940	Polyadenylate-binding protein 1 OS=Homo sapiens GN=PABPC1 PE=1 SV=2 - [PABP1_HUMAN]	49.06	6.45	11.95	4.09	2.99	15.72	11.48	12.11	9.28	8.65	10.69	11.95	2.67	12.89	2.67	5.03	5.03		5.82	8.33	9.28
Q9NPQ8-4	Isoform 4 of Synembryn-A OS=Homo sapiens GN=RIC8A - [RIC8A_HUMAN]	49.06	3.4	2.08	8.3	5.09	2.83	1.32	5.09	3.4	3.21		4.72	5.09	5.66			3.21		1.51		3.77
P09211	Glutathione S-transferase P OS=Homo sapiens GN=GSTP1 PE=1 SV=2 - [GSTP1_HUMAN]	49.05	21.9	9.52						7.14			4.76	14.29		14.29	17.62	17.62	5.24	5.71	13.33	14.76
P84090	Enhancer of rudimentary homolog OS=Homo sapiens GN=ERH PE=1 SV=1 - [ERH_HUMAN]	49.04	10.58				14.42			17.31	26.92	26.92	26.92		16.35		7.69		16.35	21.15	10.58
K7ERP4	Glutathione peroxidase (Fragment) OS=Homo sapiens GN=GPX4 PE=3 SV=1 - [K7ERP4_HUMAN]	49.03	8.39								7.1		7.74	9.03		21.29	8.39			3.87
B4DHT5	Acyl-CoA synthetase family member 2, mitochondrial OS=Homo sapiens GN=ACSF2 PE=2 SV=1 - [B4DHT5_HUMAN]	49	8.64	1.99			4.32	5.32	3.16	5.32	6.81	1.83		10.47	9.8	3.16		1.99		3.49	2.82	1.66
Q9UNX4	WD repeat-containing protein 3 OS=Homo sapiens GN=WDR3 PE=1 SV=1 - [WDR3_HUMAN]	48.99	6.89	6.79	6.36	1.59	3.82	3.18	3.18	2.33	6.47	7.53	5.3	2.86	6.36			1.91	4.35	2.01	2.86	1.8
Q96GD0	Pyridoxal phosphate phosphatase OS=Homo sapiens GN=PDXP PE=1 SV=2 - [PLPP_HUMAN]	48.99	2.36	10.81	4.73	4.73			4.39		12.5	7.43	7.43	10.47		15.54	5.74			3.38	8.11
O43237	Cytoplasmic dynein 1 light intermediate chain 2 OS=Homo sapiens GN=DYNC1LI2 PE=1 SV=1 - [DC1L2_HUMAN]	48.98	9.55	6.3	2.64	6.1	2.64	3.46	3.86	3.66	2.44	10.77	11.99	3.05	6.5	3.86	7.32	3.66	3.66			2.64
F5H2H5	Ankyrin repeat and LEM domain-containing protein 2 OS=Homo sapiens GN=ANKLE2 PE=2 SV=1 - [F5H2H5_HUMAN]	48.97	2.4	5.59	0.8	2.74	4.22	2.97	4	3.42	4.91	3.65	1.48	3.42		1.03	1.37	5.02	6.85		1.37	2.28
D6RD96	Long-chain-fatty-acid--CoA ligase 4 (Fragment) OS=Homo sapiens GN=ACSL4 PE=2 SV=1 - [D6RD96_HUMAN]	48.97						5.52	17.24		6.21	6.21	4.83		4.83	20		6.9		14.48	14.48
P51991	Heterogeneous nuclear ribonucleoprotein A3 OS=Homo sapiens GN=HNRNPA3 PE=1 SV=2 - [ROA3_HUMAN]	48.94	9.79	7.67	5.82	14.81	1.85	6.08	4.23	17.2	20.11	25.13	16.4	9.79	11.38	9.79	9.79	2.12	4.76	6.88	4.76	12.17
P51946	Cyclin-H OS=Homo sapiens GN=CCNH PE=1 SV=1 - [CCNH_HUMAN]	48.92	3.72						7.43	2.48	9.29		5.88	3.41				4.33		10.84	3.41	4.02
P49643	DNA primase large subunit OS=Homo sapiens GN=PRIM2 PE=1 SV=2 - [PRI2_HUMAN]	48.92	2.16	2.95	4.72	4.72	2.16	4.13		7.66	3.54	1.57		2.75	3.34		4.91	2.75	1.38		4.32	5.11
Q9NR28-2	Isoform 2 of Diablo homolog, mitochondrial OS=Homo sapiens GN=DIABLO - [DBLOH_HUMAN]	48.92	9.68		5.91					9.14	9.14		17.2		17.2				6.99
Q9BVJ6	U3 small nucleolar RNA-associated protein 14 homolog A OS=Homo sapiens GN=UTP14A PE=1 SV=1 - [UT14A_HUMAN]	48.9	6.61	5.84	2.98	1.82	1.43	2.08	1.43	2.08	2.33	2.46	6.36	1.43	6.36	1.69		4.8	3.63	6.61	9.34	2.46
Q9BQ67	Glutamate-rich WD repeat-containing protein 1 OS=Homo sapiens GN=GRWD1 PE=1 SV=1 - [GRWD1_HUMAN]	48.88	6.73	8.3			9.87	3.14	3.14	3.14	6.95		5.61		5.61		8.74	8.52	3.59
P12955	Xaa-Pro dipeptidase OS=Homo sapiens GN=PEPD PE=1 SV=3 - [PEPD_HUMAN]	48.88			5.88	2.84	5.68	5.68	7.91		5.07	3.25		9.53	8.92	6.29	9.94			8.32
O14562	Ubiquitin domain-containing protein UBFD1 OS=Homo sapiens GN=UBFD1 PE=1 SV=2 - [UBFD1_HUMAN]	48.87	8.09	9.39	3.56			16.18	8.09	3.56	3.56			4.21	8.09	3.56		3.56	3.56		2.27	5.83
P28070	Proteasome subunit beta type-4 OS=Homo sapiens GN=PSMB4 PE=1 SV=4 - [PSB4_HUMAN]	48.86	7.58	8.33			6.44	8.33	12.5	9.47		3.41	11.74	7.58	8.33		5.68		7.58	18.94		3.41
P17544-4	Isoform 4 of Cyclic AMP-dependent transcription factor ATF-7 OS=Homo sapiens GN=ATF7 - [ATF7_HUMAN]	48.86		6.84		8.79	2.93	2.93		7.17	7.17					3.58	3.58	11.07	5.54
G3V4W0	Heterogeneous nuclear ribonucleoproteins C1/C2 (Fragment) OS=Homo sapiens GN=HNRNPC PE=2 SV=1 - [G3V4W0_HUMAN]	48.85	2.67	19.47	8.78	12.6	12.98	22.9	25.57	29.77	23.28	16.03	11.83	3.44	7.63	3.05	7.25	23.66	17.18	11.45	11.07	4.2
O43837	Isocitrate dehydrogenase [NAD] subunit beta, mitochondrial OS=Homo sapiens GN=IDH3B PE=1 SV=2 - [IDH3B_HUMAN]	48.83		17.66	11.95	9.09	15.84	14.81		4.42	4.42						10.13	5.19	5.19	3.12		5.19
P63000-2	Isoform B of Ras-related C3 botulinum toxin substrate 1 OS=Homo sapiens GN=RAC1 - [RAC1_HUMAN]	48.82	16.59	5.21					6.64	11.37	8.53	4.74		16.59	9.48	20.38	10.43	6.64		5.69	5.69	7.58
P30047	GTP cyclohydrolase 1 feedback regulatory protein OS=Homo sapiens GN=GCHFR PE=1 SV=3 - [GFRP_HUMAN]	48.81		29.76			19.05	19.05												19.05		29.76
Q53FA7	Quinone oxidoreductase PIG3 OS=Homo sapiens GN=TP53I3 PE=1 SV=2 - [QORX_HUMAN]	48.8	5.42		5.72	6.33	6.33				5.42		4.52	5.42	8.73					6.63	6.63	13.25
C9J6N5	Protein FAM107B (Fragment) OS=Homo sapiens GN=FAM107B PE=2 SV=1 - [C9J6N5_HUMAN]	48.8			10.4			8						5.6					20	24	7.2
P04181	Ornithine aminotransferase, mitochondrial OS=Homo sapiens GN=OAT PE=1 SV=1 - [OAT_HUMAN]	48.75	2.28				3.87	3.64	7.29	3.64			12.3		3.19		7.52	10.02	10.93	7.29	2.05
Q9BUT9	Protein FAM195A OS=Homo sapiens GN=FAM195A PE=1 SV=2 - [F195A_HUMAN]	48.75							6.88		15				35		6.88
G5E9V1	Protein TFG OS=Homo sapiens GN=TFG PE=2 SV=1 - [G5E9V1_HUMAN]	48.74	6.06	14.9	13.64	7.32	5.05	7.58	4.29	6.57				17.68	4.04	13.13			12.63	6.57	5.05	6.06
Q9Y223-2	Isoform 2 of Bifunctional UDP-N-acetylglucosamine 2-epimerase/N-acetylmannosamine kinase OS=Homo sapiens GN=GNE - [GLCNE_HUMAN]	48.74	2.52	3.32	3.98	1.46	6.37	5.71	5.71		9.3	5.44	1.33	6.77	3.32	9.3	1.2		2.26	3.19	2.39	4.91
P50570-2	Isoform 2 of Dynamin-2 OS=Homo sapiens GN=DNM2 - [DYN2_HUMAN]	48.73	3.35	8.31	5.2	2.54	1.85	8.66	4.39	2.19	3.12	2.89	2.89	5.31	8.31	3	1.04	5.54	3.81	0.81	4.62	2.54
Q9NPD8	Ubiquitin-conjugating enzyme E2 T OS=Homo sapiens GN=UBE2T PE=1 SV=1 - [UBE2T_HUMAN]	48.73				4.06	3.55							8.63	13.2	7.61	9.64				10.66
Q9NR33	DNA polymerase epsilon subunit 4 OS=Homo sapiens GN=POLE4 PE=1 SV=2 - [DPOE4_HUMAN]	48.72	17.95		30.77				10.26	10.26				9.4
P09622	Dihydrolipoyl dehydrogenase, mitochondrial OS=Homo sapiens GN=DLD PE=1 SV=2 - [DLDH_HUMAN]	48.72	10.41	9.23	5.7	5.11	1.57	3.73	6.48	6.48	4.91		1.38	4.32	1.38	4.91	6.09		4.52	4.72	2.55	3.73
Q9UNS2	COP9 signalosome complex subunit 3 OS=Homo sapiens GN=COPS3 PE=1 SV=3 - [CSN3_HUMAN]	48.7		2.84	2.84	2.6			5.44	1.89	4.02	4.02			8.04	4.73	4.73	2.84	8.27	6.86		10.64
Q92572	AP-3 complex subunit sigma-1 OS=Homo sapiens GN=AP3S1 PE=1 SV=1 - [AP3S1_HUMAN]	48.7		5.7	4.15				6.22		7.77	4.15				4.66	4.66				10.88	10.88
P78347-2	Isoform 2 of General transcription factor II-I OS=Homo sapiens GN=GTF2I - [GTF2I_HUMAN]	48.69	2.82	1.04	1.25		5.33	4.6	1.36	2.51	0.84	5.12	2.93	11.39	2.51	6.79	6.27	5.96	5.85	9.82	4.81	1.04
Q6NZY4	Zinc finger CCHC domain-containing protein 8 OS=Homo sapiens GN=ZCCHC8 PE=1 SV=2 - [ZCHC8_HUMAN]	48.66	4.95	10.89	2.69	2.83	5.37				7.21	1.13		3.82	1.98			1.41	11.17	4.81	2.83	6.79
P51452	Dual specificity protein phosphatase 3 OS=Homo sapiens GN=DUSP3 PE=1 SV=1 - [DUS3_HUMAN]	48.65		9.73						7.03	7.57	5.41	12.43	8.11	7.03		3.78
E7EUY3	Propionyl-CoA carboxylase beta chain, mitochondrial OS=Homo sapiens GN=PCCB PE=2 SV=1 - [E7EUY3_HUMAN]	48.64	3.1	2.52			6.98	4.46			3.88	3.88	6.01	3.1	5.81			9.3	2.71	3.88
P55039	Developmentally-regulated GTP-binding protein 2 OS=Homo sapiens GN=DRG2 PE=1 SV=1 - [DRG2_HUMAN]	48.63	8.24	8.52		8.79	4.4	2.2	2.2			2.2	2.75	11.54		5.49					2.75	5.49
P50213	Isocitrate dehydrogenase [NAD] subunit alpha, mitochondrial OS=Homo sapiens GN=IDH3A PE=1 SV=1 - [IDH3A_HUMAN]	48.63	4.92	5.46		2.19					4.92	6.28	6.28		2.19	5.46	8.47	2.46		9.29	7.1	14.48
P09132	Signal recognition particle 19 kDa protein OS=Homo sapiens GN=SRP19 PE=1 SV=3 - [SRP19_HUMAN]	48.61	8.33		17.36		8.33								4.17	9.03					10.42
F8W950	Aminoacyl tRNA synthase complex-interacting multifunctional protein 2 OS=Homo sapiens GN=AIMP2 PE=2 SV=1 - [F8W950_HUMAN]	48.61		12.75			3.19		6.37		10.36	3.59				3.59	5.18	5.18	6.77	6.77	4.78	11.95
Q12907	Vesicular integral-membrane protein VIP36 OS=Homo sapiens GN=LMAN2 PE=1 SV=1 - [LMAN2_HUMAN]	48.6	2.81	15.17	10.39	6.46	5.62	3.37	3.65		8.71	3.93	3.93		2.53	2.81	6.18	9.27		2.53		7.87
Q9NS69	Mitochondrial import receptor subunit TOM22 homolog OS=Homo sapiens GN=TOMM22 PE=1 SV=3 - [TOM22_HUMAN]	48.59			14.79	14.79	32.39		8.45									7.75	16.2	8.45	8.45
P13807	Glycogen [starch] synthase, muscle OS=Homo sapiens GN=GYS1 PE=1 SV=2 - [GYS1_HUMAN]	48.58	3.66	5.16	6.92		4.75	3.93	2.58	4.07	4.07	4.75		8.68	5.83	5.02	3.93	3.26	6.11	8.96		5.02
P49821-2	Isoform 2 of NADH dehydrogenase [ubiquinone] flavoprotein 1, mitochondrial OS=Homo sapiens GN=NDUFV1 - [NDUV1_HUMAN]	48.57	5.05	4.4			10.99	19.34	2.42	3.52	3.74	3.74	5.93	2.2	5.93		2.86	4.4			2.2	2.2
B4DJV2	Citrate synthase OS=Homo sapiens GN=CS PE=2 SV=1 - [B4DJV2_HUMAN]	48.57	3.53	1.99		1.99	10.6	5.52	7.95	4.86	8.61	7.51	4.64	7.06	4.64	3.53	3.53	3.53	4.64	6.62
H0YMB3	GMP reductase 2 OS=Homo sapiens GN=GMPR2 PE=2 SV=1 - [H0YMB3_HUMAN]	48.57		6.98	10.16	5.71		3.17		5.4	5.4	19.05	8.89		3.81	3.81	2.22			3.49
Q9Y316-2	Isoform 2 of Protein MEMO1 OS=Homo sapiens GN=MEMO1 - [MEMO1_HUMAN]	48.54	10.58		7.3			2.55			10.58						11.31	6.2
P61313	60S ribosomal protein L15 OS=Homo sapiens GN=RPL15 PE=1 SV=2 - [RL15_HUMAN]	48.53	7.84	20.59	12.75	13.73	7.84	7.84	11.27	7.84	14.71	11.27	11.27	10.78	14.71	14.71	21.08	28.92	15.69	12.25		20.59
P62070	Ras-related protein R-Ras2 OS=Homo sapiens GN=RRAS2 PE=1 SV=1 - [RRAS2_HUMAN]	48.53	3.92	7.84	5.88	5.88	21.08	13.24	11.76	7.35								5.88	6.86	6.86		7.84
Q9BRQ6	Coiled-coil-helix-coiled-coil-helix domain-containing protein 6, mitochondrial OS=Homo sapiens GN=CHCHD6 PE=1 SV=1 - [CHCH6_HUMAN]	48.51	8.09		4.68	6.81			7.23					15.32	5.96	5.11
Q8WVH6	MB protein OS=Homo sapiens GN=MB PE=2 SV=1 - [Q8WVH6_HUMAN]	48.48		19.19					14.14	14.14					15.15	17.17	17.17			18.18
Q96ME1-4	Isoform 4 of F-box/LRR-repeat protein 18 OS=Homo sapiens GN=FBXL18 - [FXL18_HUMAN]	48.47	3.9	7.94	2.65		1.67	2.65	1.95	6.13	2.65	3.2	1.67	5.15	2.92	2.79		2.09		4.6	3.06	2.92
Q9UBF2	Coatomer subunit gamma-2 OS=Homo sapiens GN=COPG2 PE=1 SV=1 - [COPG2_HUMAN]	48.45	2.87	6.2	2.53	1.49	2.41	6.54	5.74	3.33	4.36	3.33	1.95	7.23	5.74	6.43	5.4	4.36	6.31	6.2	2.64	2.07
Q8N335	Glycerol-3-phosphate dehydrogenase 1-like protein OS=Homo sapiens GN=GPD1L PE=1 SV=1 - [GPD1L_HUMAN]	48.43		6.84	3.99			3.99	3.99	2.28		4.27	13.39			8.83	11.68	2.56	6.55			4.84
Q5TB53	Transmembrane 9 superfamily member 3 (Fragment) OS=Homo sapiens GN=TM9SF3 PE=2 SV=1 - [Q5TB53_HUMAN]	48.43		14.96			7.87	7.48	10.24			3.94	3.94		3.15		3.94	7.09	7.09		7.48	10.63
Q8WZA0	Protein LZIC OS=Homo sapiens GN=LZIC PE=1 SV=1 - [LZIC_HUMAN]	48.42	5.79			7.89	11.58	11.58	11.58		4.21	5.79		13.16		13.16			7.37
Q9NT62	Ubiquitin-like-conjugating enzyme ATG3 OS=Homo sapiens GN=ATG3 PE=1 SV=1 - [ATG3_HUMAN]	48.41		2.87	4.78		17.52	2.23		4.14					4.78	3.18	3.18	4.14	4.14	8.92	6.05	2.87
Q12824-2	Isoform B of SWI/SNF-related matrix-associated actin-dependent regulator of chromatin subfamily B member 1 OS=Homo sapiens GN=SMARCB1 - [SNF5_HUMAN]	48.4	3.72	2.39	5.05	10.9	2.66	10.64	10.64		6.91			5.59		3.46	3.46	3.46		4.26	7.45	2.39
O00487	26S proteasome non-ATPase regulatory subunit 14 OS=Homo sapiens GN=PSMD14 PE=1 SV=1 - [PSDE_HUMAN]	48.39	10.97	5.48			5.16	7.42		7.42	10.32	8.39		10.97		5.16	9.35	13.87	4.19
P51553	Isocitrate dehydrogenase [NAD] subunit gamma, mitochondrial OS=Homo sapiens GN=IDH3G PE=1 SV=1 - [IDH3G_HUMAN]	48.35	5.6			3.31	3.31			10.94	10.69	7.89	10.43	2.04	3.56	5.6	5.85	10.18				5.09
Q9NQE9	Histidine triad nucleotide-binding protein 3 OS=Homo sapiens GN=HINT3 PE=1 SV=1 - [HINT3_HUMAN]	48.35			5.49							8.24	8.24		15.93				10.44		8.24
Q96FW1	Ubiquitin thioesterase OTUB1 OS=Homo sapiens GN=OTUB1 PE=1 SV=2 - [OTUB1_HUMAN]	48.34	5.54	4.43				9.59	9.59	6.64		16.61	16.61	5.54	19.56		3.69				8.49	8.12
K4DI93	Cullin 4B, isoform CRA_e OS=Homo sapiens GN=CUL4B PE=3 SV=1 - [K4DI93_HUMAN]	48.33	1.78	4.11	6.67	3.56	6.78	2.78	1.33	2.11	12.11	5.33	5.11	6.67	9.56	1.44	5.33	6.33	5.33	3.78	1.33	2.56
O75607	Nucleoplasmin-3 OS=Homo sapiens GN=NPM3 PE=1 SV=3 - [NPM3_HUMAN]	48.31		6.18	14.61	8.43								19.1		24.72	11.8	20.79	8.99	8.99
Q6DKJ4	Nucleoredoxin OS=Homo sapiens GN=NXN PE=1 SV=2 - [NXN_HUMAN]	48.28	2.3	7.36	10.8	2.53		10.8	9.43	2.99				7.36	3.45		2.07				6.67	3.68
Q08211	ATP-dependent RNA helicase A OS=Homo sapiens GN=DHX9 PE=1 SV=4 - [DHX9_HUMAN]	48.27	3.31	3.54	1.42	2.91	7.95	8.66	4.65	5.91	5.98	8.19	9.13	7.4	5.2	8.74	7.09	9.69	12.91	11.97	7.09	4.41
Q3ZCW2	Galectin-related protein OS=Homo sapiens GN=LGALSL PE=1 SV=2 - [LEGL_HUMAN]	48.26				5.81	5.81					11.05				5.23		12.79		13.37
Q7Z5K2	Wings apart-like protein homolog OS=Homo sapiens GN=WAPAL PE=1 SV=1 - [WAPL_HUMAN]	48.24	5.29	2.1	5.55	3.28	2.27	3.78	2.94	2.86	2.69			2.86	6.13	1.68	2.02	2.86	1.34	3.03	0.92	5.63
P12270	Nucleoprotein TPR OS=Homo sapiens GN=TPR PE=1 SV=3 - [TPR_HUMAN]	48.24	5.25	3.43	3.68	3.13	5.54	3.94	3.72	5.08	4.23	4.1	3.3	5.92	4.91	8.8	5.59	4.44	5.04	4.78	4.82	3.72
F5GZ78	Paxillin OS=Homo sapiens GN=PXN PE=2 SV=1 - [F5GZ78_HUMAN]	48.22		3.06		1.7		4.58	11.21	14.6	10.87	6.11						4.41	10.19	9.34	2.55	3.06
Q8IVS2	Malonyl-CoA-acyl carrier protein transacylase, mitochondrial OS=Homo sapiens GN=MCAT PE=1 SV=2 - [FABD_HUMAN]	48.21	4.1	2.05						7.44		5.13	2.82	4.62		5.9	2.82	2.82		5.13		8.21
Q9GZS1-2	Isoform 2 of DNA-directed RNA polymerase I subunit RPA49 OS=Homo sapiens GN=POLR1E - [RPA49_HUMAN]	48.21			4.06		3.82	2.15		8.59	3.34		10.5	5.01		2.86	6.21	2.15	5.97	1.91	2.86
Q6WCQ1	Myosin phosphatase Rho-interacting protein OS=Homo sapiens GN=MPRIP PE=1 SV=3 - [MPRIP_HUMAN]	48.2	2.93		4.39		5.17	5.56	4.78	1.85	0.78			7.32	1.85	2.73	3.8	4.68	6.93	1.27	5.56
Q9HAF1	Chromatin modification-related protein MEAF6 OS=Homo sapiens GN=MEAF6 PE=1 SV=1 - [EAF6_HUMAN]	48.17	7.33			11.52		6.81	6.81							7.85	20.94	21.47			6.28
O00499-9	Isoform BIN1-10-13 of Myc box-dependent-interacting protein 1 OS=Homo sapiens GN=BIN1 - [BIN1_HUMAN]	48.17		5.38	5.38	2.44	2.44	2.44	16.87	6.11	12.47	8.31	4.65	4.89		7.33	4.89	4.89	4.89	5.13
P51580	Thiopurine S-methyltransferase OS=Homo sapiens GN=TPMT PE=1 SV=1 - [TPMT_HUMAN]	48.16	13.06	2.86					3.27	9.8	15.92								2.86	4.9	6.12	3.27
D3DU85	Na(+)/H(+) exchange regulatory cofactor NHE-RF2 OS=Homo sapiens GN=SLC9A3R2 PE=2 SV=1 - [D3DU85_HUMAN]	48.16	3.99	3.37	3.99	7.67	10.43		3.68		3.99	4.29	4.29			8.28		2.76	3.99			2.76
Q96GM5	SWI/SNF-related matrix-associated actin-dependent regulator of chromatin subfamily D member 1 OS=Homo sapiens GN=SMARCD1 PE=1 SV=2 - [SMRD1_HUMAN]	48.16	2.91	6.8	2.14		7.18	4.27		1.55	1.55		1.75	3.69		6.21	6.21	2.14	5.05	11.84	10.29	3.88
Q9H845	Acyl-CoA dehydrogenase family member 9, mitochondrial OS=Homo sapiens GN=ACAD9 PE=1 SV=1 - [ACAD9_HUMAN]	48.15	5.15	2.09	7.41	11.11	5.64	5.31			7.25	5.48	1.13	3.7	3.54	6.6	2.9	2.25	4.03	7.89	12.72	4.19
Q6UXV4	Apolipoprotein O-like OS=Homo sapiens GN=APOOL PE=1 SV=1 - [APOOL_HUMAN]	48.13	2.61				5.22					5.22		5.6	11.57	10.82			12.69	6.34
Q49A26-2	Isoform 2 of Putative oxidoreductase GLYR1 OS=Homo sapiens GN=GLYR1 - [GLYR1_HUMAN]	48.13	1.31				2.99		5.97	13.81	6.34	4.85	3.36	5.04	3.36	1.87	1.87	5.78	3.17
O15226	NF-kappa-B-repressing factor OS=Homo sapiens GN=NKRF PE=1 SV=2 - [NKRF_HUMAN]	48.12	3.04			3.19		1.59	4.35	4.49	2.03		5.51	3.48	10.72	1.59	7.83	7.39	1.88	3.77	4.2	5.22
Q12996	Cleavage stimulation factor subunit 3 OS=Homo sapiens GN=CSTF3 PE=1 SV=1 - [CSTF3_HUMAN]	48.12	4.18	7.81	3.91	1.53	4.88	1.12	4.88	8.51	4.6	3.35	4.74	9.76	3.21	3.63	1.53	0.98	3.07	1.95	2.65	9.48
Q05682-5	Isoform 5 of Caldesmon OS=Homo sapiens GN=CALD1 - [CALD1_HUMAN]	48.12	4.51	3.2	1.88	1.88	5.08		5.45	3.01	2.82	6.2	13.53	9.02		5.83	3.57	5.83	2.26	2.44	9.77	4.51
P04150-2	Isoform Beta of Glucocorticoid receptor OS=Homo sapiens GN=NR3C1 - [GCR_HUMAN]	48.11	1.08	2.29	6.06	1.48	4.45	2.7	2.7		5.26	2.56	2.56			2.56	1.21	7.41	1.62	1.08	12.53	4.58
B4DXX7	ATP-dependent RNA helicase DDX3Y OS=Homo sapiens GN=DDX3Y PE=2 SV=1 - [B4DXX7_HUMAN]	48.1	4.11	8.83	5.94	7	3.65	1.67	5.18	8.22	5.18	12.48	7	5.18	1.67	6.24	7.61	5.94	5.48	8.07	11.87	8.68
Q9Y3L5	Ras-related protein Rap-2c OS=Homo sapiens GN=RAP2C PE=1 SV=1 - [RAP2C_HUMAN]	48.09					6.01	6.01									19.67	4.92	19.67	19.67	13.11	8.74
Q99729-3	Isoform 3 of Heterogeneous nuclear ribonucleoprotein A/B OS=Homo sapiens GN=HNRNPAB - [ROAA_HUMAN]	48.07	6.32	6.32	3.51	3.51	7.37	7.37	18.25	4.91	22.11	14.39	14.39		14.39	6.67	6.67	4.21		21.05	19.3	6.32
Q9BV57	1,2-dihydroxy-3-keto-5-methylthiopentene dioxygenase OS=Homo sapiens GN=ADI1 PE=1 SV=1 - [MTND_HUMAN]	48.04	7.82		6.7												7.82	7.82	14.53		3.91	7.26
Q8WWI1-3	Isoform 3 of LIM domain only protein 7 OS=Homo sapiens GN=LMO7 - [LMO7_HUMAN]	48.04	4.37	2.08	1.7	2.89	3.11	5.04	6.75	4.82	2.97	2.52	3.56	5.86	3.71	8.6	4.74	2.3	1.48	3.71	6.45	5.78
Q9BRJ2	39S ribosomal protein L45, mitochondrial OS=Homo sapiens GN=MRPL45 PE=1 SV=2 - [RM45_HUMAN]	48.04				10.13	6.21		2.94		11.11	5.23	3.27	2.94	6.54		2.61		3.27		8.5	9.48
M0R0F0	40S ribosomal protein S5 (Fragment) OS=Homo sapiens GN=RPS5 PE=4 SV=1 - [M0R0F0_HUMAN]	48	8.5	34.5	21.5	4	7.5	14	19	14.5	5		5		21				9	14.5	13	22
Q99543	DnaJ homolog subfamily C member 2 OS=Homo sapiens GN=DNAJC2 PE=1 SV=4 - [DNJC2_HUMAN]	47.99	10.79		4.03	2.58	3.38			1.93	7.09	2.74	5.48	11.59	3.86	1.29	3.06	8.37	2.58	3.22		2.25
P31947	14-3-3 protein sigma OS=Homo sapiens GN=SFN PE=1 SV=1 - [1433S_HUMAN]	47.98	34.27	15.32	22.58	17.74	19.76	11.29	23.79	20.16	4.03	3.23		20.56	17.34	12.9	3.63	11.29	7.66	4.03	7.66	8.06
Q86TX2	Acyl-coenzyme A thioesterase 1 OS=Homo sapiens GN=ACOT1 PE=1 SV=1 - [ACOT1_HUMAN]	47.98		7.36	2.61	4.04			7.84	7.84		2.61	4.51	11.4	2.61	5.7		2.38	7.13	4.51		9.98
P05091	Aldehyde dehydrogenase, mitochondrial OS=Homo sapiens GN=ALDH2 PE=1 SV=2 - [ALDH2_HUMAN]	47.97	5.03	5.22	7.54	2.32		6	6	11.41	3.09	9.09	6.38	7.74	2.32	4.45	4.45	3.87	6.38	10.44	13.54	5.22
P43246	DNA mismatch repair protein Msh2 OS=Homo sapiens GN=MSH2 PE=1 SV=1 - [MSH2_HUMAN]	47.97	4.6		5.25	5.14	10.71	1.18	4.18	4.18	2.78	2.14	3.85	3.75	1.07	0.86	8.03	4.39	4.07	3	6.53	0.96
Q15021	Condensin complex subunit 1 OS=Homo sapiens GN=NCAPD2 PE=1 SV=3 - [CND1_HUMAN]	47.97	5.28	4.14	3.21	1.78	0.64	4.43	3.57	1.5	3.14	5.42	7.07	1.86	0.57	3.14	2.14	5	3.21	3.71	6.5	5.92
P78344	Eukaryotic translation initiation factor 4 gamma 2 OS=Homo sapiens GN=EIF4G2 PE=1 SV=1 - [IF4G2_HUMAN]	47.96		0.99	1.21	2.21	4.96	4.41	1.54	5.4	4.74	5.18	3.97	3.42	2.65	4.19	1.65	5.84	8.6	5.29	4.3	2.09
D3DQV9	Eukaryotic translation initiation factor 4 gamma 2 (Fragment) OS=Homo sapiens GN=EIF4G2 PE=2 SV=1 - [D3DQV9_HUMAN]	47.96		0.99	1.21	2.21	4.96	3.09	1.54	5.4	4.74	5.18	3.97	3.42	2.65	4.19	1.65	5.84	8.6	5.29	5.62	2.09
Q9P287-4	Isoform 4 of BRCA2 and CDKN1A-interacting protein OS=Homo sapiens GN=BCCIP - [BCCIP_HUMAN]	47.95	7.88	5.14				9.93	7.88	7.88	8.9	2.74		7.88		7.88	5.48	13.36		7.53	4.79	7.88
P62906	60S ribosomal protein L10a OS=Homo sapiens GN=RPL10A PE=1 SV=2 - [RL10A_HUMAN]	47.93	5.99	12.44	3.69	9.22	7.37	11.06	11.06	11.06	7.83	7.83	7.83		6.45	5.99	11.52	11.98	11.98	9.68	5.99	5.99
G3V256	Zinc finger CCCH domain-containing protein 14 OS=Homo sapiens GN=ZC3H14 PE=2 SV=1 - [G3V256_HUMAN]	47.93		9.42	2.64	5.79	4.79	8.93	7.27	4.13			1.32		5.79	3.97	7.77	2.31		1.49	5.95	4.63
O43143	Putative pre-mRNA-splicing factor ATP-dependent RNA helicase DHX15 OS=Homo sapiens GN=DHX15 PE=1 SV=2 - [DHX15_HUMAN]	47.92	6.92	1.51	1.51	9.94	6.79	3.4		4.03	3.77	7.42	2.52	6.92	5.66	3.27	6.42	6.67	10.57	5.03	4.03	4.53
E9PB90	Hexokinase-2 OS=Homo sapiens GN=HK2 PE=2 SV=1 - [E9PB90_HUMAN]	47.92	3.71	1.69	5.06	5.51	5.29			6.75	7.65	3.37	3.37	8.1	3.04	4.61	1.8	2.81	7.2		3.15	2.7
E5RJU9	Protein LYRIC OS=Homo sapiens GN=MTDH PE=2 SV=1 - [E5RJU9_HUMAN]	47.91	18.44	3.61	2.09	2.09	3.8	6.08	4.37	6.08	4.37		2.85	6.08	2.85	6.08	9.7	6.84	2.47	2.47	3.99
O75396	Vesicle-trafficking protein SEC22b OS=Homo sapiens GN=SEC22B PE=1 SV=4 - [SC22B_HUMAN]	47.91		12.09	11.16	9.3	4.65		6.98	12.56	3.72	3.72	8.84			8.84	8.84	8.84		13.49		6.51
P52564	Dual specificity mitogen-activated protein kinase kinase 6 OS=Homo sapiens GN=MAP2K6 PE=1 SV=1 - [MP2K6_HUMAN]	47.9		8.38	6.89	2.69						11.38	13.77	4.49	5.99	4.19	8.98	4.79			7.19	4.19
P48506	Glutamate--cysteine ligase catalytic subunit OS=Homo sapiens GN=GCLC PE=1 SV=2 - [GSH1_HUMAN]	47.88	1.73	3.14	4.55	7.54	10.52	3.3	12.4	5.97	4.4	1.57	6.91			4.55	3.14	0.94	1.41	7.38	2.83	3.92
Q9UBQ7	Glyoxylate reductase/hydroxypyruvate reductase OS=Homo sapiens GN=GRHPR PE=1 SV=1 - [GRHPR_HUMAN]	47.87	9.76	2.74	2.74			10.67	10.67	5.49	10.67	10.67	7.32		7.32	5.49	8.54	3.05	3.05	8.84
Q13642-1	Isoform 1 of Four and a half LIM domains protein 1 OS=Homo sapiens GN=FHL1 - [FHL1_HUMAN]	47.86	11.07				13.93	4.29			2.5		7.86				3.57		8.21
P16435	NADPH--cytochrome P450 reductase OS=Homo sapiens GN=POR PE=1 SV=2 - [NCPR_HUMAN]	47.86		10.49	5.32	8.12	9.9	3.25	6.79	7.39	1.77	7.24	6.65		5.32	6.35	3.4	1.33	1.33	6.5	1.62	4.58
Q9NX57	Ras-related protein Rab-20 OS=Homo sapiens GN=RAB20 PE=1 SV=1 - [RAB20_HUMAN]	47.86					11.97	7.69	7.69	7.69	4.27	5.13		5.13	6.41				11.11			11.11
O43175	D-3-phosphoglycerate dehydrogenase OS=Homo sapiens GN=PHGDH PE=1 SV=4 - [SERA_HUMAN]	47.84	12.01	12.95	7.13	7.13	13.51	10.51	9.19	7.69	9.76	9.19	6.38	10.13	7.13	6.19	9.19	9.19	12.95	6.19	7.88	3.56
Q96B26	Exosome complex component RRP43 OS=Homo sapiens GN=EXOSC8 PE=1 SV=1 - [EXOS8_HUMAN]	47.83	10.14				5.8	5.8	5.8	5.8	15.58	9.78		10.87		7.61				10.87	11.59
K7ELG9	Protein LSM12 homolog OS=Homo sapiens GN=LSM12 PE=4 SV=1 - [K7ELG9_HUMAN]	47.83				5.65				9.57				13.48		16.52	25.22
Q27J81-2	Isoform 2 of Inverted formin-2 OS=Homo sapiens GN=INF2 - [INF2_HUMAN]	47.82	2.5	2.9	2.66	3.71	3.79	3.23	4.19	8.87	3.47	4.76	2.18	5.89	3.87	6.45	6.69	3.55	3.55		3.39	1.45
Q02218	2-oxoglutarate dehydrogenase, mitochondrial OS=Homo sapiens GN=OGDH PE=1 SV=3 - [ODO1_HUMAN]	47.8	8.6	5.28	3.03	6.84	5.77	8.7	3.52	0.98		1.37	8.5	9.38	2.44	6.06	2.74	1.96	1.27	5.28	8.02	5.96
Q8NI08-2	Isoform 2 of Nuclear receptor coactivator 7 OS=Homo sapiens GN=NCOA7 - [NCOA7_HUMAN]	47.8	0.75		4.62	6.02	3.11	5.16	1.5	1.4	5.26		1.5	1.5	2.58	3.11	5.8	3.87	5.59		2.26	4.19
O75746	Calcium-binding mitochondrial carrier protein Aralar1 OS=Homo sapiens GN=SLC25A12 PE=1 SV=2 - [CMC1_HUMAN]	47.79	3.54	3.39	6.05	1.18	5.75	2.36		5.6	6.05	6.19	1.33		6.93		12.39	2.8	2.36	2.95	3.24	1.47
P68431	Histone H3.1 OS=Homo sapiens GN=HIST1H3A PE=1 SV=2 - [H31_HUMAN]	47.79	11.03	6.62		5.15	5.15	11.76	6.62	6.62	6.62	11.76	6.62	11.76	6.62	6.62	38.24	11.76	6.62	5.15	11.76	11.76
Q9NZL4	Hsp70-binding protein 1 OS=Homo sapiens GN=HSPBP1 PE=1 SV=1 - [HPBP1_HUMAN]	47.79	2.49	7.18	17.68	8.29		2.76	3.04		2.76		15.75	6.08	10.5							3.31
P51153	Ras-related protein Rab-13 OS=Homo sapiens GN=RAB13 PE=1 SV=1 - [RAB13_HUMAN]	47.78	3.45	13.3		5.42	5.42	9.36			5.42	5.42	5.42		5.42			6.9	3.94	5.42
Q5T6J8	Probable gluconokinase OS=Homo sapiens GN=IDNK PE=2 SV=1 - [Q5T6J8_HUMAN]	47.78															15.56			32.22
Q14152	Eukaryotic translation initiation factor 3 subunit A OS=Homo sapiens GN=EIF3A PE=1 SV=1 - [EIF3A_HUMAN]	47.76	9.62	3.33	0.51	5.35	8.39	4.56	2.82	4.34	9.77	4.78	3.04	1.3	5.64	4.85	3.04	5.86	4.2	3.76	7.67	4.56
K7EPH2	Phenylalanine--tRNA ligase alpha subunit (Fragment) OS=Homo sapiens GN=FARSA PE=3 SV=1 - [K7EPH2_HUMAN]	47.76				6.6	13.19	20.84	16.62	15.83	9.76	9.76	3.96	10.82	7.92	8.97		3.43			3.69
Q9HCU5	Prolactin regulatory element-binding protein OS=Homo sapiens GN=PREB PE=1 SV=2 - [PREB_HUMAN]	47.72			4.32	14.15	5.04			2.16		6.71	10.07				5.76		4.56	3.84	5.28	5.28
Q12874	Splicing factor 3A subunit 3 OS=Homo sapiens GN=SF3A3 PE=1 SV=1 - [SF3A3_HUMAN]	47.7	2.59	3.59	8.18	1.8	7.39	3.79	1.8		3.79	6.59	6.19	3.99	8.78	2	3.79	6.39	6.19	8.18	5.99
O14617	AP-3 complex subunit delta-1 OS=Homo sapiens GN=AP3D1 PE=1 SV=1 - [AP3D1_HUMAN]	47.7	9.11	2.08	2.86		3.12	5.81	2.43	2.34	5.2	1.99		4.86	4.25	7.46	3.9	6.85	3.9	0.87	2.86	1.47
C9J7B1	Protein NipSnap homolog 2 (Fragment) OS=Homo sapiens GN=GBAS PE=2 SV=1 - [C9J7B1_HUMAN]	47.69							23.08										10.77		13.85	13.85
P55884	Eukaryotic translation initiation factor 3 subunit B OS=Homo sapiens GN=EIF3B PE=1 SV=3 - [EIF3B_HUMAN]	47.67	1.23	10.07	1.47		2.21	3.93	9.83	5.04	7.86	4.91	7.25		9.21	8.23	5.16	7.37	8.23	7.99	3.93	8.72
O94973-2	Isoform 2 of AP-2 complex subunit alpha-2 OS=Homo sapiens GN=AP2A2 - [AP2A2_HUMAN]	47.66	2.34	6.91	1.81	1.17	5.11	9.57	4.89	0.96	5.64	3.4	1.17	1.06	3.94	2.45	0.64	3.62	6.81	7.02	2.34	4.57
Q13084	39S ribosomal protein L28, mitochondrial OS=Homo sapiens GN=MRPL28 PE=1 SV=4 - [RM28_HUMAN]	47.66	5.08		8.98	8.98								14.84		8.98	3.52	7.42	12.11
P55769	NHP2-like protein 1 OS=Homo sapiens GN=NHP2L1 PE=1 SV=3 - [NH2L1_HUMAN]	47.66		9.38		8.59	8.59	9.38	12.5	12.5	21.88	18.75	9.38		19.53				7.03	16.41		9.38
Q86YS6	Ras-related protein Rab-43 OS=Homo sapiens GN=RAB43 PE=1 SV=1 - [RAB43_HUMAN]	47.64	5.19	5.19				5.19	5.19	6.6		6.6			5.19	5.19		3.77			25.47	5.19
O95571	Protein ETHE1, mitochondrial OS=Homo sapiens GN=ETHE1 PE=1 SV=2 - [ETHE1_HUMAN]	47.64								26.38	8.66	3.94					8.27	8.27	3.94	7.48	9.45	5.51
Q6KB66-2	Isoform 2 of Keratin, type II cytoskeletal 80 OS=Homo sapiens GN=KRT80 - [K2C80_HUMAN]	47.63	6.87	7.58	7.82		4.98	4.74			7.58	2.37	2.37	6.64	3.55			4.5	2.13	2.13	2.13	2.61
I3L0N3	Vesicle-fusing ATPase OS=Homo sapiens GN=NSF PE=2 SV=1 - [I3L0N3_HUMAN]	47.63	3.11	1.35	1.49	4.33	5.55	6.36	1.62		4.87	1.76	4.74	2.17	5.95	8.39	5.41	3.11	1.49	4.74	7.44	1.35
P80303	Nucleobindin-2 OS=Homo sapiens GN=NUCB2 PE=1 SV=2 - [NUCB2_HUMAN]	47.62	7.38	4.29	9.76		5.95	5.95	2.38	2.38	5.24			15.48	3.1	9.76	5		3.81	3.57
O43402	ER membrane protein complex subunit 8 OS=Homo sapiens GN=EMC8 PE=1 SV=1 - [EMC8_HUMAN]	47.62				7.62					4.76	4.76					9.05	8.1	4.29	5.71	8.1
O75569	Interferon-inducible double stranded RNA-dependent protein kinase activator A OS=Homo sapiens GN=PRKRA PE=1 SV=1 - [PRKRA_HUMAN]	47.6	4.15	5.11	8.31	3.19	6.07	3.83	3.83								5.75	9.58	4.79	2.88		6.07
O94973	AP-2 complex subunit alpha-2 OS=Homo sapiens GN=AP2A2 PE=1 SV=2 - [AP2A2_HUMAN]	47.6	2.34	6.92	1.81	1.17	3.62	8.09	4.9	0.96	5.64	3.41	1.17	1.06	3.94	2.45	0.64	5.01	8.2	7.03	2.34	4.58
Q9UNQ2	Probable dimethyladenosine transferase OS=Homo sapiens GN=DIMT1 PE=1 SV=1 - [DIM1_HUMAN]	47.6				2.88	13.1	5.11		3.51		3.19	4.15	3.19	4.15			4.47			7.99
Q96LJ7	Dehydrogenase/reductase SDR family member 1 OS=Homo sapiens GN=DHRS1 PE=1 SV=1 - [DHRS1_HUMAN]	47.6							4.47	7.67	10.86				14.38					6.07	17.89	8.63
Q8WX92	Negative elongation factor B OS=Homo sapiens GN=NELFB PE=1 SV=1 - [NELFB_HUMAN]	47.59	1.9	4.48	3.62	3.28	3.28	1.38			1.72	1.72	3.97	3.62	2.24	2.59	5	4.66	4.31	9.83	13.1	8.79
F5H1S9	tRNA pseudouridine synthase OS=Homo sapiens GN=PUS1 PE=2 SV=1 - [F5H1S9_HUMAN]	47.59	3.21		2.67	2.67		5.35	2.67		2.41	4.01		3.21	2.94	8.29	10.16	6.68	3.48	5.35	8.56	7.49
Q9NX63	Coiled-coil-helix-coiled-coil-helix domain-containing protein 3, mitochondrial OS=Homo sapiens GN=CHCHD3 PE=1 SV=1 - [CHCH3_HUMAN]	47.58	13.22				11.89	4.85	3.52		12.33	17.62		3.52	11.45	9.25		3.52	3.96	13.66	13.66
P07339	Cathepsin D OS=Homo sapiens GN=CTSD PE=1 SV=1 - [CATD_HUMAN]	47.57	2.43	6.8	8.01	4.13	5.34	2.67	6.07	1.7	1.94		4.85	2.67	2.43	7.04	4.61	6.31		7.52	7.52	6.8
Q5SNT6	WASH complex subunit FAM21B OS=Homo sapiens GN=FAM21B PE=2 SV=2 - [FA21B_HUMAN]	47.57	3.99	4.31	0.64	1.04	1.44	6.46	2.95	1.92		1.92		4.07	2.63	1.92	4.71	5.67	4.07	1.36	3.67	7.42
P56181-2	Isoform 2 of NADH dehydrogenase [ubiquinone] flavoprotein 3, mitochondrial OS=Homo sapiens GN=NDUFV3 - [NDUV3_HUMAN]	47.57	9.73	4.44	3.17			2.75	4.23	4.23	4.02	5.71	7.19	6.34	2.96	13.95	4.44	3.17		1.9		2.96
P61960-2	Isoform 2 of Ubiquitin-fold modifier 1 OS=Homo sapiens GN=UFM1 - [UFM1_HUMAN]	47.57									6.8				13.59	33.98
P60510	Serine/threonine-protein phosphatase 4 catalytic subunit OS=Homo sapiens GN=PPP4C PE=1 SV=1 - [PP4C_HUMAN]	47.56	15.96			3.26				4.23				10.75	8.79	2.61			3.58	2.61		11.07
O95340	Bifunctional 3'-phosphoadenosine 5'-phosphosulfate synthase 2 OS=Homo sapiens GN=PAPSS2 PE=1 SV=2 - [PAPS2_HUMAN]	47.56	2.61		3.91	2.12	11.56	5.54	2.77	4.56	4.56	1.79	6.68	1.3	2.28	3.75	6.84	5.21	7.82	3.42	6.68	3.91
P17858	6-phosphofructokinase, liver type OS=Homo sapiens GN=PFKL PE=1 SV=6 - [K6PL_HUMAN]	47.56	3.46	9.23	4.49	2.44	5	2.69	2.18	8.08	10.13	5.38	3.59		7.18	1.54	1.15	1.15	5.77	9.1	6.28	2.18
Q05048	Cleavage stimulation factor subunit 1 OS=Homo sapiens GN=CSTF1 PE=1 SV=1 - [CSTF1_HUMAN]	47.56		4.18	3.25				6.03			2.78	1.62		3.48	1.86	6.03	7.66		2.09	7.89	12.06
Q15075	Early endosome antigen 1 OS=Homo sapiens GN=EEA1 PE=1 SV=2 - [EEA1_HUMAN]	47.55	3.4	4.39	2.55	0.99	5.95	4.96	2.13	6.38	4.82	2.91	4.75	2.2	3.05	1.98	5.1	1.84	5.17	1.98	1.35	4.32
O14979-3	Isoform 3 of Heterogeneous nuclear ribonucleoprotein D-like OS=Homo sapiens GN=HNRPDL - [HNRDL_HUMAN]	47.54		10.66	15.98	15.98	10.25	6.56		25.41	17.62	17.62	5.74		14.34	16.8	13.93	6.56	4.92	8.2	9.02	10.66
Q13564-2	Isoform 2 of NEDD8-activating enzyme E1 regulatory subunit OS=Homo sapiens GN=NAE1 - [ULA1_HUMAN]	47.54			1.7	1.7	9.66	5.3	2.84		7.01	5.68		7.2	7.39	1.7	2.84	2.84	2.46	1.89	1.7	5.49
Q9H9B4	Sideroflexin-1 OS=Homo sapiens GN=SFXN1 PE=1 SV=4 - [SFXN1_HUMAN]	47.52		3.42	6.21	12.11	8.7	4.04	4.04		6.21		6.83	3.11	2.17	3.11	2.8	7.14	4.35	2.8	2.48	2.48
Q5TAQ0	Mitochondrial nucleoid factor 1 OS=Homo sapiens GN=MNF1 PE=2 SV=1 - [Q5TAQ0_HUMAN]	47.52		12.87					11.88	11.88				15.84	6.93	15.84	15.84
P35270	Sepiapterin reductase OS=Homo sapiens GN=SPR PE=1 SV=1 - [SPRE_HUMAN]	47.51			9.58	3.45	9.58	5.75		4.21				2.68	3.83	5.75	5.75	9.58	11.11	7.28
P00367	Glutamate dehydrogenase 1, mitochondrial OS=Homo sapiens GN=GLUD1 PE=1 SV=2 - [DHE3_HUMAN]	47.49	6.63	6.45	3.58		4.12	6.27	8.6	1.79	4.66	2.33		5.56	8.96	13.62	6.09	8.42	9.86	7.35	4.84	1.43
Q96N06	Uncharacterized protein C16orf55 OS=Homo sapiens GN=C16orf55 PE=2 SV=1 - [CP055_HUMAN]	47.48			12.23	12.23		10.79	11.51												12.95
P46779	60S ribosomal protein L28 OS=Homo sapiens GN=RPL28 PE=1 SV=3 - [RL28_HUMAN]	47.45	13.14	8.03	9.49		8.03	13.14	8.03					8.03	8.03	8.03		5.84	5.84	16.06	8.03	8.03
P00568	Adenylate kinase isoenzyme 1 OS=Homo sapiens GN=AK1 PE=1 SV=3 - [KAD1_HUMAN]	47.42	3.61						6.19	16.49	21.65	11.86	15.46		3.61					10.82	11.34
P23434	Glycine cleavage system H protein, mitochondrial OS=Homo sapiens GN=GCSH PE=1 SV=2 - [GCSH_HUMAN]	47.4			5.78		5.2								22.54		11.56	19.65	11.56			5.78
P00813	Adenosine deaminase OS=Homo sapiens GN=ADA PE=1 SV=3 - [ADA_HUMAN]	47.38	5.23		2.2	15.7	13.22	3.86	1.93	5.79		2.48							5.51		8.54	8.54
P50552	Vasodilator-stimulated phosphoprotein OS=Homo sapiens GN=VASP PE=1 SV=3 - [VASP_HUMAN]	47.37	2.63	3.42	6.05	2.89	3.68	10.26	12.11				2.89				2.89	10.53	8.16	3.16	4.21
E9PEQ4	Dynamin-2 OS=Homo sapiens GN=DNM2 PE=2 SV=1 - [E9PEQ4_HUMAN]	47.36	3.33	8.28	6.55	3.91	1.84	8.62	4.37	2.18	3.1	2.87	2.87	5.29	6.55	2.07	1.03	5.52	3.79	0.8	2.99	2.53
B8ZZA8	Glutaminase kidney isoform, mitochondrial OS=Homo sapiens GN=GLS PE=2 SV=1 - [B8ZZA8_HUMAN]	47.34	12.43		4.73	10.65	10.65						9.47	10.06						9.47
Q13148	TAR DNA-binding protein 43 OS=Homo sapiens GN=TARDBP PE=1 SV=1 - [TADBP_HUMAN]	47.34	2.66	14.49	5.8			2.9	4.59	6.76	5.8	5.8		2.66	9.42		2.9	4.83	2.9		8.7	14.49
P49841-2	Isoform 2 of Glycogen synthase kinase-3 beta OS=Homo sapiens GN=GSK3B - [GSK3B_HUMAN]	47.34		3.93	1.39		2.08		2.77	7.39	4.85					5.54	4.62		4.85	5.54	10.62	5.77
Q5VV42	Threonylcarbamoyladenosine tRNA methylthiotransferase OS=Homo sapiens GN=CDKAL1 PE=1 SV=1 - [CDKAL_HUMAN]	47.32	3.8	6.91	4.49	3.28	2.07	4.66		5.18			3.45	5.01	1.9	1.21	3.8		7.94			4.49
Q14257	Reticulocalbin-2 OS=Homo sapiens GN=RCN2 PE=1 SV=1 - [RCN2_HUMAN]	47.32	10.73						9.46	5.99	11.04	11.04							9.78	17.03	24.61	8.2
Q8NEM2	SHC SH2 domain-binding protein 1 OS=Homo sapiens GN=SHCBP1 PE=1 SV=3 - [SHCBP_HUMAN]	47.32		2.53			2.08	1.19	4.91	6.25	5.51	8.63	3.72	3.13				2.83	11.61	7.74	2.08
Q14697-2	Isoform 2 of Neutral alpha-glucosidase AB OS=Homo sapiens GN=GANAB - [GANAB_HUMAN]	47.31	2.9	11.8	12.11	7.14	9.83	9.52	9.63	10.35	14.8	8.9	5.18	4.76	5.18	3.62		6.11	5.18	2.8	1.04	9.21
Q9BX68	Histidine triad nucleotide-binding protein 2, mitochondrial OS=Homo sapiens GN=HINT2 PE=1 SV=1 - [HINT2_HUMAN]	47.24	9.2	22.09	9.82										9.2		15.95	15.95	10.43			12.27
Q14008	Cytoskeleton-associated protein 5 OS=Homo sapiens GN=CKAP5 PE=1 SV=3 - [CKAP5_HUMAN]	47.24	3.69	3.94	2.46	1.72	6.74	3.05	2.36	2.07	7.19	6	4.72	2.51	2.46	3.59	3.89	2.07	3.3	0.98	2.71	4.18
Q5T9A4	ATPase family AAA domain-containing protein 3B OS=Homo sapiens GN=ATAD3B PE=1 SV=1 - [ATD3B_HUMAN]	47.22	2.93	2.31	6.02	4.78	1.23	8.64	3.24	7.87	4.48	1.23	7.87	2.62	4.01	5.56	1.39					4.78
Q9Y3B4	Pre-mRNA branch site protein p14 OS=Homo sapiens GN=SF3B14 PE=1 SV=1 - [PM14_HUMAN]	47.2					8.8	20	11.2	18.4	7.2			6.4		17.6				9.6	9.6
P51608-2	Isoform B of Methyl-CpG-binding protein 2 OS=Homo sapiens GN=MECP2 - [MECP2_HUMAN]	47.19	9.84	4.82	1.61		2.81			3.61	8.84	3.21		9.84			6.43	5.82	10.84	7.03	6.63	3.01
Q8N4Q1	Mitochondrial intermembrane space import and assembly protein 40 OS=Homo sapiens GN=CHCHD4 PE=1 SV=1 - [MIA40_HUMAN]	47.18								18.31	9.86			12.68	16.2	14.08						6.34
Q9BUL8	Programmed cell death protein 10 OS=Homo sapiens GN=PDCD10 PE=1 SV=1 - [PDC10_HUMAN]	47.17	2.83	21.7			6.13	5.19			6.13		11.32	3.77	11.32			7.08		5.66	5.66	10.38
Q15393	Splicing factor 3B subunit 3 OS=Homo sapiens GN=SF3B3 PE=1 SV=4 - [SF3B3_HUMAN]	47.17	4.93	6.16	3.53	2.05	3.37	3.62		0.74	6.16	6.74	3.62	4.93	5.42	10.85	4.77	1.89	2.3	2.3	6.08	5.26
Q96PE7	Methylmalonyl-CoA epimerase, mitochondrial OS=Homo sapiens GN=MCEE PE=1 SV=1 - [MCEE_HUMAN]	47.16				18.18					5.11						16.48	7.39
Q8WUA2	Peptidyl-prolyl cis-trans isomerase-like 4 OS=Homo sapiens GN=PPIL4 PE=1 SV=1 - [PPIL4_HUMAN]	47.15	5.89	1.83	1.83		7.72						15.45	3.66	5.49		7.52		4.47	5.89	3.86
Q5JS54	Proteasome assembly chaperone 4 OS=Homo sapiens GN=PSMG4 PE=2 SV=2 - [PSMG4_HUMAN]	47.15									9.76			20.33		20.33				17.07	9.76
Q7L2E3-2	Isoform 2 of Putative ATP-dependent RNA helicase DHX30 OS=Homo sapiens GN=DHX30 - [DHX30_HUMAN]	47.14	1.72		1.55	2.45	5.97	4.34	6.79	2.13	3.36	3.11	6.79		11.13			2.78	6.71	2.13	4.09	3.19
K7EMQ9	Eukaryotic translation initiation factor 3 subunit K (Fragment) OS=Homo sapiens GN=EIF3K PE=4 SV=1 - [K7EMQ9_HUMAN]	47.14		5						24.29	10	10			5			7.86	7.86
Q15233	Non-POU domain-containing octamer-binding protein OS=Homo sapiens GN=NONO PE=1 SV=4 - [NONO_HUMAN]	47.13	18.9	6.58	2.55	6.58	8.49	8.92	5.94	3.4	6.58	9.34	9.34	9.13	18.47	5.94	9.34	7.43	9.13	7.22	4.88	6.79
Q6IQ22	Ras-related protein Rab-12 OS=Homo sapiens GN=RAB12 PE=1 SV=3 - [RAB12_HUMAN]	47.13	4.51	8.2	3.69				8.2			7.38	15.98		8.61	12.3	9.02	9.02			4.51	4.51
P11441	Ubiquitin-like protein 4A OS=Homo sapiens GN=UBL4A PE=1 SV=1 - [UBL4A_HUMAN]	47.13		7.64								6.37	5.1				14.65	10.19		7.01	6.37
O95347	Structural maintenance of chromosomes protein 2 OS=Homo sapiens GN=SMC2 PE=1 SV=2 - [SMC2_HUMAN]	47.12	5.68	9.52	0.67	0.75	4.76	5.85	2.76	7.85	0.75	0.92	2.59	3.09	3.93	4.51	1.84	3.93	2.84	3.51	3.43	4.51
O75116	Rho-associated protein kinase 2 OS=Homo sapiens GN=ROCK2 PE=1 SV=4 - [ROCK2_HUMAN]	47.12	5.33	6.77	1.22	1.22	2.31	0.65	2.81	5.04	4.11	3.31	5.55	3.89	3.75	4.39	2.45	6.27	7.49	5.19	3.67	6.63
Q5U5X0	Complex III assembly factor LYRM7 OS=Homo sapiens GN=LYRM7 PE=1 SV=1 - [LYRM7_HUMAN]	47.12						6.73							14.42		15.38	9.62			16.35	16.35
P54725	UV excision repair protein RAD23 homolog A OS=Homo sapiens GN=RAD23A PE=1 SV=1 - [RD23A_HUMAN]	47.11		10.47	8.26	2.2	10.19	18.18			3.31		2.48		4.96	2.48	2.48	7.16		2.2	2.2	7.71
P62699	Protein yippee-like 5 OS=Homo sapiens GN=YPEL5 PE=1 SV=1 - [YPEL5_HUMAN]	47.11				9.92	11.57				17.36					8.26	8.26
Q96CT7	Coiled-coil domain-containing protein 124 OS=Homo sapiens GN=CCDC124 PE=1 SV=1 - [CC124_HUMAN]	47.09	5.83	4.04	4.04			7.17		4.48	13.9	9.87	9.87	5.83	13.9	10.31	4.04		4.48			8.52
P62487	DNA-directed RNA polymerase II subunit RPB7 OS=Homo sapiens GN=POLR2G PE=1 SV=1 - [RPB7_HUMAN]	47.09	8.72	6.98											4.65	9.3			6.4		11.05
O15173	Membrane-associated progesterone receptor component 2 OS=Homo sapiens GN=PGRMC2 PE=1 SV=1 - [PGRC2_HUMAN]	47.09		3.14	3.14		3.59	3.59				2.69		10.76	4.04	29.15	21.97	3.59	13.9	4.04	8.97	3.14
O43776	Asparagine--tRNA ligase, cytoplasmic OS=Homo sapiens GN=NARS PE=1 SV=1 - [SYNC_HUMAN]	47.08	3.28	2.01	10.77	9.49	18.61	10.4	7.66	2.92	9.31	3.47	5.84	3.83	5.84	2.01		5.84	6.75	1.64		3.83
P15328	Folate receptor alpha OS=Homo sapiens GN=FOLR1 PE=1 SV=3 - [FOLR1_HUMAN]	47.08					17.51						10.51			7.39	4.28	9.73		7.39
F5GXX5	Dolichyl-diphosphooligosaccharide--protein glycosyltransferase subunit DAD1 OS=Homo sapiens GN=DAD1 PE=2 SV=1 - [F5GXX5_HUMAN]	47.06		11.76		11.76	21.18		25.88	14.12			11.76		11.76							11.76
B4DJ58	Ribosomal L1 domain-containing protein 1 OS=Homo sapiens GN=RSL1D1 PE=2 SV=1 - [B4DJ58_HUMAN]	47.04	6.67	3.33		7.41	3.33	7.41	11.11	15.19			5.19	6.67	2.59	6.3	6.3	5.19	2.96	5.56	10	11.11
O60506	Heterogeneous nuclear ribonucleoprotein Q OS=Homo sapiens GN=SYNCRIP PE=1 SV=2 - [HNRPQ_HUMAN]	47.03	8.67	14.29	1.28	1.28	3.05	6.74	10.11	8.67	7.54	5.94	7.54	7.54	11.4	8.67	9.63	9.15	6.26	7.06	5.3	8.67
O95865	N(G),N(G)-dimethylarginine dimethylaminohydrolase 2 OS=Homo sapiens GN=DDAH2 PE=1 SV=1 - [DDAH2_HUMAN]	47.02		2.81	9.47		6.32			3.16	3.16				7.37		8.07	12.28	2.81	5.61	5.61
H3BU66	Mannose-6-phosphate isomerase (Fragment) OS=Homo sapiens GN=MPI PE=2 SV=1 - [H3BU66_HUMAN]	47.02					10.12		10.71	10.71		26.79	16.07							9.52	9.52
P82933	28S ribosomal protein S9, mitochondrial OS=Homo sapiens GN=MRPS9 PE=1 SV=2 - [RT09_HUMAN]	46.97	3.03					9.6	4.55	13.13	2.78	11.62	12.63		3.03		4.04				4.55	3.54
P52815	39S ribosomal protein L12, mitochondrial OS=Homo sapiens GN=MRPL12 PE=1 SV=2 - [RM12_HUMAN]	46.97		11.11	4.55				6.06	11.62	11.62					7.07				17.17	17.17
P61160	Actin-related protein 2 OS=Homo sapiens GN=ACTR2 PE=1 SV=1 - [ARP2_HUMAN]	46.95	4.31	6.85	8.12		3.81	6.85	6.85	15.99	9.14			6.09	6.85	4.31	3.81	3.81	6.35	7.61	5.84	6.85
Q99584	Protein S100-A13 OS=Homo sapiens GN=S100A13 PE=1 SV=1 - [S10AD_HUMAN]	46.94	6.12						12.24	21.43				10.2		6.12		11.22	11.22			7.14
H0Y990	ATP-binding cassette sub-family E member 1 (Fragment) OS=Homo sapiens GN=ABCE1 PE=2 SV=1 - [H0Y990_HUMAN]	46.94					6.12	6.12			19.73	17.01				6.8				8.84	8.84	4.76
P46937-2	Isoform 2 of Yorkie homolog OS=Homo sapiens GN=YAP1 - [YAP1_HUMAN]	46.93	1.64	7.58	5.94			3.28	7.99	6.15	11.89	8.4	9.22		4.3		8.81	11.27	7.79	7.79	4.1
Q9Y508	RING finger protein 114 OS=Homo sapiens GN=RNF114 PE=1 SV=1 - [RN114_HUMAN]	46.93				5.26	4.39				4.82		7.89		8.77		5.7		10.09
P57740	Nuclear pore complex protein Nup107 OS=Homo sapiens GN=NUP107 PE=1 SV=1 - [NU107_HUMAN]	46.92	1.51	4	4.11	2.81	2.92	13.84	7.35	3.14	0.97	4.54	2.81	3.03	3.68	5.95		2.7	2.7	2.05	0.86	0.86
Q9UNX3	60S ribosomal protein L26-like 1 OS=Homo sapiens GN=RPL26L1 PE=1 SV=1 - [RL26L_HUMAN]	46.9	6.21	6.21	17.24	6.21			12.41	22.07	9.66	4.83			5.52				5.52
Q9BZK7	F-box-like/WD repeat-containing protein TBL1XR1 OS=Homo sapiens GN=TBL1XR1 PE=1 SV=1 - [TBL1R_HUMAN]	46.89	5.25	4.86	2.92	2.92	7	6.23			8.56	8.56				3.5		8.56	10.89		1.75	2.33
K7EKB6	Thimet oligopeptidase (Fragment) OS=Homo sapiens GN=THOP1 PE=4 SV=1 - [K7EKB6_HUMAN]	46.89		6.21	6.21			7.34				3.95			3.95		11.3	11.3	7.91	5.65	6.21
P41240	Tyrosine-protein kinase CSK OS=Homo sapiens GN=CSK PE=1 SV=1 - [CSK_HUMAN]	46.89			7.11	5.56	3.11	3.11	4.22	4.22	8.67	6.22	7.33	2.22	4	3.33	6.44	3.33	3.56
Q9Y312	Protein AAR2 homolog OS=Homo sapiens GN=AAR2 PE=1 SV=2 - [AAR2_HUMAN]	46.88		5.21			1.82				1.82	7.81	3.91		10.42		4.43		5.73	10.16		9.11
C9IZA5	Transitional endoplasmic reticulum ATPase (Fragment) OS=Homo sapiens GN=VCP PE=2 SV=1 - [C9IZA5_HUMAN]	46.88		5	5	20.63	16.25	8.75	11.25	16.88	16.88			8.75	5	13.13	18.13	9.38	19.38	10	10	5
P28072	Proteasome subunit beta type-6 OS=Homo sapiens GN=PSMB6 PE=1 SV=4 - [PSB6_HUMAN]	46.86	4.6			7.11		9.21	8.79	4.6	12.97	4.18	4.18			4.6	8.37		16.32
Q96Q11-2	Isoform 2 of CCA tRNA nucleotidyltransferase 1, mitochondrial OS=Homo sapiens GN=TRNT1 - [TRNT1_HUMAN]	46.86	9.66	2.9		5.56			3.86	2.17	9.9			11.11		2.42	2.9	2.17			3.86	6.76
O15400-2	Isoform 2 of Syntaxin-7 OS=Homo sapiens GN=STX7 - [STX7_HUMAN]	46.86		8.79					3.77							10.88			11.3	6.28	6.28	14.64
Q8TAE8	Growth arrest and DNA damage-inducible proteins-interacting protein 1 OS=Homo sapiens GN=GADD45GIP1 PE=1 SV=1 - [G45IP_HUMAN]	46.85	9.01	5.41	5.41			6.31	6.31				13.96	12.16		4.95	4.95			5.86	4.95
Q00403	Transcription initiation factor IIB OS=Homo sapiens GN=GTF2B PE=1 SV=1 - [TF2B_HUMAN]	46.84	3.16	5.38						4.43	16.77		3.48		3.16	6.33	11.39		5.06		4.75
Q5JTJ3-3	Isoform 3 of Cytochrome c oxidase assembly factor 6 homolog OS=Homo sapiens GN=COA6 - [COA6_HUMAN]	46.84			20.25	20.25			17.72		8.86			16.46		16.46			17.72
B4DDT7	5'-AMP-activated protein kinase subunit gamma-1 OS=Homo sapiens GN=PRKAG1 PE=2 SV=1 - [B4DDT7_HUMAN]	46.82					6.02	3.34		2.68	4.35	6.02			3.68	6.35	13.04	6.02		3.68		9.03
B4DXP9	Alpha-centractin OS=Homo sapiens GN=ACTR1A PE=2 SV=1 - [B4DXP9_HUMAN]	46.81	4.86								17.93	11.55	3.95	5.47		10.03			10.03	7.9	4.86
O60888-3	Isoform C of Protein CutA OS=Homo sapiens GN=CUTA - [CUTA_HUMAN]	46.79	8.97				11.54	11.54						8.97		26.28	33.97	7.69		8.97	8.97
O15143	Actin-related protein 2/3 complex subunit 1B OS=Homo sapiens GN=ARPC1B PE=1 SV=3 - [ARC1B_HUMAN]	46.77	11.56	8.33		5.11		7.26	7.8	2.69	2.69	7.26	21.51	9.14	9.68	4.57	6.18	6.18	6.18	9.68	4.84	3.49
J9JID7	Lamin B2, isoform CRA_a OS=Homo sapiens GN=LMNB2 PE=3 SV=1 - [J9JID7_HUMAN]	46.77	3.23	3.39	1.77		1.94	4.03	1.94	4.52	9.35	6.94	7.26	7.26	5.48	5.65	6.77	4.68	7.58	3.55	4.03	5.16
O60216	Double-strand-break repair protein rad21 homolog OS=Homo sapiens GN=RAD21 PE=1 SV=2 - [RAD21_HUMAN]	46.75	1.74	10.3	6.5	9.83	7.13	7.61	7.61	1.27	4.91	3.65		6.97		4.75	3.8	8.87	1.58	1.43	1.9	3.49
O60716-5	Isoform 1A of Catenin delta-1 OS=Homo sapiens GN=CTNND1 - [CTND1_HUMAN]	46.73	1.82	6.22	4.72	3.97	5.79	3.97	2.14	7.61	4.39	1.82	5.47	4.93		2.04		2.04	3.32	0.86	1.61	5.14
Q7L2E3	Putative ATP-dependent RNA helicase DHX30 OS=Homo sapiens GN=DHX30 PE=1 SV=1 - [DHX30_HUMAN]	46.73	1.76		1.59	2.51	6.11	4.44	6.95	2.18	3.43	3.18	6.95		11.39	0.67		2.85	4.69	2.18	4.19	3.27
O43264	Centromere/kinetochore protein zw10 homolog OS=Homo sapiens GN=ZW10 PE=1 SV=3 - [ZW10_HUMAN]	46.73		5.78	4.24	3.08	1.03	1.41		1.54	6.55	3.98	6.03	1.54	4.62	2.44	3.72		7.7	1.16	1.16	1.93
Q53H96	Pyrroline-5-carboxylate reductase 3 OS=Homo sapiens GN=PYCRL PE=1 SV=2 - [P5CR3_HUMAN]	46.72	9.85	12.04			5.11	5.11					4.01	6.93	8.03		4.01		2.92		4.74	4.74
H7BY49	Nucleolysin TIA-1 isoform p40 (Fragment) OS=Homo sapiens GN=TIA1 PE=4 SV=1 - [H7BY49_HUMAN]	46.71	20.39											13.16	27.63	15.79						5.26
P63096-2	Isoform 2 of Guanine nucleotide-binding protein G(i) subunit alpha-1 OS=Homo sapiens GN=GNAI1 - [GNAI1_HUMAN]	46.69	5.96			3.97	11.26	3.97	5.3	10.6		2.65			2.65			4.97	14.57	3.31	4.3
Q14344	Guanine nucleotide-binding protein subunit alpha-13 OS=Homo sapiens GN=GNA13 PE=1 SV=2 - [GNA13_HUMAN]	46.68	7.16	2.65						5.57	2.65	5.84		2.92	5.31				9.02	8.22	3.71	1.86
P48735	Isocitrate dehydrogenase [NADP], mitochondrial OS=Homo sapiens GN=IDH2 PE=1 SV=2 - [IDHP_HUMAN]	46.68			2.88	5.97	2.88	2.88		3.54	8.19	6.19	6.19	4.87	1.99	6.64	1.55	5.53	11.5	2.43		1.77
Q9UJS0	Calcium-binding mitochondrial carrier protein Aralar2 OS=Homo sapiens GN=SLC25A13 PE=1 SV=2 - [CMC2_HUMAN]	46.67	1.04	4.3	9.78	5.04	3.85	2.37	4.59	1.78	6.07	1.78	2.52	1.33	2.37	5.78	8.59	3.56	4.44	7.11	6.22	3.26
Q96PK6	RNA-binding protein 14 OS=Homo sapiens GN=RBM14 PE=1 SV=2 - [RBM14_HUMAN]	46.64	6.28		2.84	1.49	4.63	3.29	1.64	4.04	10.46	17.34	6.58	2.24	3.59	4.78	2.39	4.63	11.06		1.35
P61764	Syntaxin-binding protein 1 OS=Homo sapiens GN=STXBP1 PE=1 SV=1 - [STXB1_HUMAN]	46.63	6.4	2.36	5.72		2.19	3.03		2.69	4.38	3.37	7.24		5.39	2.86	2.86	9.09		2.53	4.55	2.19
Q86VN1	Vacuolar protein-sorting-associated protein 36 OS=Homo sapiens GN=VPS36 PE=1 SV=1 - [VPS36_HUMAN]	46.63	9.33	2.59	6.22	3.37		3.89	3.89	2.59			2.33	1.55						6.74	11.4	5.7
Q13526	Peptidyl-prolyl cis-trans isomerase NIMA-interacting 1 OS=Homo sapiens GN=PIN1 PE=1 SV=1 - [PIN1_HUMAN]	46.63		12.27	16.56		13.5	13.5			11.66						12.27	12.27				7.36
P09543-2	Isoform CNPI of 2',3'-cyclic-nucleotide 3'-phosphodiesterase OS=Homo sapiens GN=CNP - [CN37_HUMAN]	46.63		8.73	16.46	10.22	5.74	6.98	2.49		8.98	14.21	6.98		8.98	5.49	3.24	2.74			2.74	2.24
Q9NWU1	3-oxoacyl-[acyl-carrier-protein] synthase, mitochondrial OS=Homo sapiens GN=OXSM PE=1 SV=1 - [OXSM_HUMAN]	46.62		5.23	3.27	3.27	2.83	2.61		5.66			8.93	5.23	8.71			1.74	12.42		3.7	8.93
Q5VZK9-2	Isoform 2 of Leucine-rich repeat-containing protein 16A OS=Homo sapiens GN=LRRC16A - [LR16A_HUMAN]	46.61	3.62	5.66	2.87	0.68	5.05	1.13	0.83	2.71	8.6	6.86	4.75	4.52	1.21	3.24	2.49	5.43	8.67	1.96	3.62	1.96
P57081	tRNA (guanine-N(7)-)-methyltransferase subunit WDR4 OS=Homo sapiens GN=WDR4 PE=1 SV=2 - [WDR4_HUMAN]	46.6	12.14	2.67				5.1	11.17					4.13	10.44	5.1		7.04	6.07
P22695	Cytochrome b-c1 complex subunit 2, mitochondrial OS=Homo sapiens GN=UQCRC2 PE=1 SV=3 - [QCR2_HUMAN]	46.58	3.97	15.01	6.4	2.21	4.64	6.84	3.31	3.31			6.4	6.84	4.64	2.43	5.96	2.43	5.08			8.83
Q93052	Lipoma-preferred partner OS=Homo sapiens GN=LPP PE=1 SV=1 - [LPP_HUMAN]	46.57	6.86		2.29		6.7		2.78	3.76	12.25	3.76		8.33	12.42	1.47	7.68	6.7	7.35	3.76	1.47	3.92
P13995	Bifunctional methylenetetrahydrofolate dehydrogenase/cyclohydrolase, mitochondrial OS=Homo sapiens GN=MTHFD2 PE=1 SV=2 - [MTDC_HUMAN]	46.57		9.71	2	6.57	6.57	3.14	6	6.57	14.86	8.29		10.86		2.29				6	6	3.43
Q7Z2W4	Zinc finger CCCH-type antiviral protein 1 OS=Homo sapiens GN=ZC3HAV1 PE=1 SV=3 - [ZCCHV_HUMAN]	46.56	6.21	3.99	4.88	3.99	4.77	3.1	1.44	3.66	6.21	10.09	6.87	4.32	5.88	1.44			3.44	1.22	2.11	2.88
Q9UG63	ATP-binding cassette sub-family F member 2 OS=Homo sapiens GN=ABCF2 PE=1 SV=2 - [ABCF2_HUMAN]	46.55	5.78	8.99	5.46	4.49	4.49	1.12	3.21	6.58	2.09	4.49	2.25	2.41	1.93	3.21	3.21	5.46	1.93	1.44	7.06	3.21
Q6PKG0	La-related protein 1 OS=Homo sapiens GN=LARP1 PE=1 SV=2 - [LARP1_HUMAN]	46.53	1.82	3.01	3.19	0.64	3.1	3.83	3.47	2.1	2.01	4.11	7.03	5.47		2.19	4.11	4.84	3.19		6.2	7.03
Q9NSK0	Kinesin light chain 4 OS=Homo sapiens GN=KLC4 PE=1 SV=3 - [KLC4_HUMAN]	46.53	3.55	1.78	1.62	1.45	1.62	6.3	2.1	1.45	4.85	5.65	7.43	1.45	5.65	1.13		3.88		1.62	1.29	7.59
F5H3A1	Sodium/potassium-transporting ATPase subunit alpha-1 OS=Homo sapiens GN=ATP1A1 PE=2 SV=1 - [F5H3A1_HUMAN]	46.53	11.14	7.33	4.01	2.25	5.87	5.67	2.74	7.62	0.98	2.35	2.54	5.57	11.05	7.92	9.38	7.14	3.13		0.88	5.57
Q9NXA8-4	Isoform 4 of NAD-dependent protein deacylase sirtuin-5, mitochondrial OS=Homo sapiens GN=SIRT5 - [SIR5_HUMAN]	46.53		8.42		5.94												18.32	5.45	6.93	7.92	8.42
F8W038	Protein C17orf49 OS=Homo sapiens GN=C17orf49 PE=2 SV=1 - [F8W038_HUMAN]	46.5		12.74	6.37												8.92	19.11	10.19	8.28
Q02809	Procollagen-lysine,2-oxoglutarate 5-dioxygenase 1 OS=Homo sapiens GN=PLOD1 PE=1 SV=2 - [PLOD1_HUMAN]	46.49	5.09	3.71	3.16	7.02	10.73	8.67	5.78	2.2	3.99	4.95	2.06	3.16	1.38	1.51		5.5	2.89	5.36	7.43	1.79
A8MXP9	Matrin-3 OS=Homo sapiens GN=MATR3 PE=2 SV=1 - [A8MXP9_HUMAN]	46.48	1.45	11.28	9.39	3.46	3.24	3.13	2.01	3.35	6.7	5.14	7.93	7.37	12.96	5.47	5.81	1.12	4.25	4.25	2.91	9.16
Q6QNY1	Biogenesis of lysosome-related organelles complex 1 subunit 2 OS=Homo sapiens GN=BLOC1S2 PE=1 SV=1 - [BL1S2_HUMAN]	46.48		7.75			11.97		5.63					21.13		21.13
P10155	60 kDa SS-A/Ro ribonucleoprotein OS=Homo sapiens GN=TROVE2 PE=1 SV=2 - [RO60_HUMAN]	46.47	7.81		1.3	1.67	7.62	7.25	3.16		6.69	5.02	2.79	14.31	4.28	7.25			4.83	2.04		1.3
Q6L8Q7	2',5'-phosphodiesterase 12 OS=Homo sapiens GN=PDE12 PE=1 SV=2 - [PDE12_HUMAN]	46.47	2.3	2.96		2.79	6.4	5.58	3.61			3.78	1.97	9.36	1.48		5.58	4.11	1.81	4.43
P42575	Caspase-2 OS=Homo sapiens GN=CASP2 PE=1 SV=2 - [CASP2_HUMAN]	46.46			3.32	2.88		2.43	1.77	6.64	7.74		7.3	9.73	6.19						3.54	6.86
Q14554	Protein disulfide-isomerase A5 OS=Homo sapiens GN=PDIA5 PE=1 SV=1 - [PDIA5_HUMAN]	46.44	5.01	6.94	6.55	3.28	3.66	11.18	11.95				10.98	5.78	8.29	6.94	1.93	9.44		3.85	1.35	2.12
P18031	Tyrosine-protein phosphatase non-receptor type 1 OS=Homo sapiens GN=PTPN1 PE=1 SV=1 - [PTN1_HUMAN]	46.44	2.53	6.44	6.21	4.83		4.37	7.13	13.1	2.3	2.53	5.29	3.91			6.9			5.29	2.76	5.52
P46937	Yorkie homolog OS=Homo sapiens GN=YAP1 PE=1 SV=2 - [YAP1_HUMAN]	46.43	1.59	7.34	5.75			3.17	7.74	5.95	13.69	8.13	7.74		4.17		8.53	10.91	7.54	7.54	3.97
P49792	E3 SUMO-protein ligase RanBP2 OS=Homo sapiens GN=RANBP2 PE=1 SV=2 - [RBP2_HUMAN]	46.43	2.48	2.39	2.05	2.45	4.75	3.16	2.02	2.54	4.25	4.84	4.68	2.76	2.7	2.98	6.45	4.31	3.44	7.63	3.97	3.88
P59998	Actin-related protein 2/3 complex subunit 4 OS=Homo sapiens GN=ARPC4 PE=1 SV=3 - [ARPC4_HUMAN]	46.43	4.76					6.55		4.76	11.31	16.07	11.31	11.9	16.07					6.55	6.55	5.36
Q9H4G0	Band 4.1-like protein 1 OS=Homo sapiens GN=EPB41L1 PE=1 SV=2 - [E41L1_HUMAN]	46.42	3.41	5.33	2.95	3.86	2.61	3.41	8.74	6.36	7.26	5.9	2.5		0.91	0.91	2.84	1.82	1.93	4.99	6.24	4.54
O00422	Histone deacetylase complex subunit SAP18 OS=Homo sapiens GN=SAP18 PE=1 SV=1 - [SAP18_HUMAN]	46.41		10.46	10.46			4.58			12.42	12.42		10.46	8.5	10.46	10.46	7.84	5.23			8.5
P62857	40S ribosomal protein S28 OS=Homo sapiens GN=RPS28 PE=1 SV=1 - [RS28_HUMAN]	46.38	30.43	17.39			17.39						17.39	17.39	17.39		15.94	28.99	15.94	17.39	30.43	30.43
Q9Y2P8	RNA 3'-terminal phosphate cyclase-like protein OS=Homo sapiens GN=RCL1 PE=1 SV=3 - [RCL1_HUMAN]	46.38			2.14		3.22		3.49	3.49	15.82	9.38	4.02		7.51		4.56			6.7	6.17
Q8TDD1-2	Isoform 2 of ATP-dependent RNA helicase DDX54 OS=Homo sapiens GN=DDX54 - [DDX54_HUMAN]	46.37	3.29	1.25	1.13	6.35	1.7	2.49	2.49	2.27	4.76	6.8	5.1	6.01	5.9	1.36	4.54	3.63	1.02	3.74	3.06	4.42
H7BYY1	Tropomyosin 1 (Alpha), isoform CRA_m OS=Homo sapiens GN=TPM1 PE=2 SV=1 - [H7BYY1_HUMAN]	46.37			10.08	8.47	8.06	3.63	7.66	3.63	4.84	13.71	6.05			3.63		8.47	4.84			12.1
Q14789	Golgin subfamily B member 1 OS=Homo sapiens GN=GOLGB1 PE=1 SV=2 - [GOGB1_HUMAN]	46.36	5.65	2.79	0.86	2.61	3.71	3.41	2.73	2.03	2.21	1.78	1.96	2.12	0.98	3.07	3.62	4.6	1.32	3.34	4.76	2.3
P21399	Cytoplasmic aconitate hydratase OS=Homo sapiens GN=ACO1 PE=1 SV=3 - [ACOC_HUMAN]	46.34	2.36	3.04	2.02	3.49	6.19	3.94	2.14	3.26	5.06	3.04		4.39	4.95	1.57	1.12		1.57	8.44	9.34	2.81
P22830	Ferrochelatase, mitochondrial OS=Homo sapiens GN=FECH PE=1 SV=2 - [HEMH_HUMAN]	46.34	2.84				7.09	13.95	4.26			2.13	6.62		12.29	1.89	1.89	5.44	1.42			5.44
Q9BZG1	Ras-related protein Rab-34 OS=Homo sapiens GN=RAB34 PE=1 SV=1 - [RAB34_HUMAN]	46.33			6.18				4.25	3.86	3.86	3.86		3.09		5.79	5.79	8.49	9.65	4.63
G3V1P3	Loss of heterozygosity 12 chromosomal region 1 protein OS=Homo sapiens GN=LOH12CR1 PE=2 SV=1 - [G3V1P3_HUMAN]	46.33				16.38							19.21				5.65	5.08
Q8TDD1	ATP-dependent RNA helicase DDX54 OS=Homo sapiens GN=DDX54 PE=1 SV=2 - [DDX54_HUMAN]	46.31	3.18	1.25	1.14	6.36	1.7	2.5	2.5	2.27	4.77	6.81	5.11	3.86	7.95	1.36	4.54	3.63	1.02	3.75	3.06	4.43
Q9BYC9	39S ribosomal protein L20, mitochondrial OS=Homo sapiens GN=MRPL20 PE=1 SV=1 - [RM20_HUMAN]	46.31		7.38			4.7							7.38	13.42		6.71	20.81		8.05		12.75
Q8WWY3	U4/U6 small nuclear ribonucleoprotein Prp31 OS=Homo sapiens GN=PRPF31 PE=1 SV=2 - [PRP31_HUMAN]	46.29	6.01	4.21	4.21		2.2		3.01	3.01	3.81			12.63	4.41	2.61	1.6	3.41		2.61	4.21	2.61
F6V707	Tumor protein D53 OS=Homo sapiens GN=TPD52L1 PE=2 SV=1 - [F6V707_HUMAN]	46.29		8		6.86					5.71	5.71	17.71					8				8
Q9H7E9	UPF0488 protein C8orf33 OS=Homo sapiens GN=C8orf33 PE=1 SV=1 - [CH033_HUMAN]	46.29			8.3	3.49				7.42	3.93		6.99	4.8	6.99	8.73			10.04
Q15785	Mitochondrial import receptor subunit TOM34 OS=Homo sapiens GN=TOMM34 PE=1 SV=2 - [TOM34_HUMAN]	46.28	5.83	6.47	2.91				3.56		12.94	6.47		10.68		4.85	2.91	5.5	3.56		6.47	6.8
P53004	Biliverdin reductase A OS=Homo sapiens GN=BLVRA PE=1 SV=2 - [BIEA_HUMAN]	46.28	3.04	2.7	4.73	4.73					8.45	21.62	17.91	3.04	7.43			2.7		6.76	6.76	6.08
P30520	Adenylosuccinate synthetase isozyme 2 OS=Homo sapiens GN=ADSS PE=1 SV=3 - [PURA2_HUMAN]	46.27	8.99		5.04	8.11		2.41			3.29	9.21	5.92	6.58	4.17	3.07		4.61	4.17	5.48		7.46
Q13769	THO complex subunit 5 homolog OS=Homo sapiens GN=THOC5 PE=1 SV=2 - [THOC5_HUMAN]	46.27	13.62	2.2	4.1	2.34	1.9		3.95	1.32	7.91	4.69		3.22	1.17	5.27	7.17	1.9	6.59			3.37
Q14651	Plastin-1 OS=Homo sapiens GN=PLS1 PE=1 SV=2 - [PLSI_HUMAN]	46.26	5.72	2.07	5.88	3.02	3.02	5.56	4.13	9.22	7.31	1.43	1.59	3.02	4.13	2.23	4.13	4.13	4.45	7.95	3.5	6.68
Q5VV41	Rho guanine nucleotide exchange factor 16 OS=Homo sapiens GN=ARHGEF16 PE=1 SV=1 - [ARHGG_HUMAN]	46.26	3.39	1.97	5.78	6.06	3.67	1.55	3.24	1.97	7.48		7.76		4.37		4.51		2.82	2.12		5.92
P29992	Guanine nucleotide-binding protein subunit alpha-11 OS=Homo sapiens GN=GNA11 PE=1 SV=2 - [GNA11_HUMAN]	46.24	11.98		4.46	2.51	3.06	7.52		9.75			4.18	11.14	3.9		3.62					3.9
P08240	Signal recognition particle receptor subunit alpha OS=Homo sapiens GN=SRPR PE=1 SV=2 - [SRPR_HUMAN]	46.24	5.02		5.8	2.66	2.19	2.66	8.62	4.08	6.74		1.57	6.27	1.41	3.76	4.39	6.74	4.23	7.37	3.29
Q14UF6	Complement decay-accelerating factor OS=Homo sapiens GN=DAF PE=2 SV=1 - [Q14UF6_HUMAN]	46.24	8.66	2.05	2.05	8.43	1.82	12.98	9.79	8.43	12.53	9.34	9.34	1.59	11.39		5.92	5.47	4.56	6.61	2.73	4.78
P50750	Cyclin-dependent kinase 9 OS=Homo sapiens GN=CDK9 PE=1 SV=3 - [CDK9_HUMAN]	46.24		8.06	4.3	11.56	2.15	5.11	1.61	2.42	10.75				4.3	2.15	7.26		5.65		1.61	2.42
Q9Y266	Nuclear migration protein nudC OS=Homo sapiens GN=NUDC PE=1 SV=1 - [NUDC_HUMAN]	46.22	2.72		3.63	6.34	8.16	6.95	8.16	11.18	5.74	6.95	6.04	25.68	4.53	16.92	9.97	3.02	2.42	5.74	4.53	4.83
O75439	Mitochondrial-processing peptidase subunit beta OS=Homo sapiens GN=PMPCB PE=1 SV=2 - [MPPB_HUMAN]	46.22		2.25	2.25	2.04	5.73	6.34	8.18	4.29	8.38		1.84		5.11		7.57	8.38	2.25	7.77	2.04	3.68
Q9NUQ3	Gamma-taxilin OS=Homo sapiens GN=TXLNG PE=1 SV=2 - [TXLNG_HUMAN]	46.21		1.7	6.63	4.92		1.7	4.92	8.71	8.9		2.08	4.73		5.3	2.46	4.73	8.33	1.7	7.01
Q08257	Quinone oxidoreductase OS=Homo sapiens GN=CRYZ PE=1 SV=1 - [QOR_HUMAN]	46.2	2.74			3.34	14.29	14.29	3.34	6.99			8.21		14.59		2.43	5.17	8.21
Q1KMD3	Heterogeneous nuclear ribonucleoprotein U-like protein 2 OS=Homo sapiens GN=HNRNPUL2 PE=1 SV=1 - [HNRL2_HUMAN]	46.18	2.68	5.09	4.95	9.37	12.05	18.34	14.06	11.24		3.61	4.82	4.28	4.95	8.57	5.76	2.95	2.41	3.88	10.58	4.95
F8VV59	Nucleosome assembly protein 1-like 1 OS=Homo sapiens GN=NAP1L1 PE=2 SV=1 - [F8VV59_HUMAN]	46.18	8.87				5.5	12.54	3.06		14.98	3.67	7.95	3.67		17.43	15.9	18.96	9.17	13.76	19.27
E9PAU2	Ribonucleoprotein PTB-binding 1 OS=Homo sapiens GN=RAVER1 PE=2 SV=1 - [E9PAU2_HUMAN]	46.16		9.39				6.35	8.07	9.39	13.23	10.32	5.95	7.14		8.2	1.72	3.17	1.19			1.46
O60763	General vesicular transport factor p115 OS=Homo sapiens GN=USO1 PE=1 SV=2 - [USO1_HUMAN]	46.15	2.81	4.89	4.89	5.3	3.43	4.57	6.44	2.08	3.22	2.49		7.38	1.56	3.53	3.85	6.96	7.59	5.2	5.41	6.44
P16333	Cytoplasmic protein NCK1 OS=Homo sapiens GN=NCK1 PE=1 SV=1 - [NCK1_HUMAN]	46.15		2.12	7.69	2.39	9.28		5.84	9.81	1.86	3.71	7.43	3.98	2.39	5.57	3.18	3.18	3.45		7.43	7.43
Q8NBJ5	Procollagen galactosyltransferase 1 OS=Homo sapiens GN=COLGALT1 PE=1 SV=1 - [GT251_HUMAN]	46.14	10.13	2.41	3.54	1.77	6.27	1.29	5.95	2.25	1.45	1.45	1.61	6.27	9	7.72	1.93	5.79	4.66	3.38	6.75	6.91
Q8IY67-2	Isoform 2 of Ribonucleoprotein PTB-binding 1 OS=Homo sapiens GN=RAVER1 - [RAVR1_HUMAN]	46.14	2.03	9.61				6.5	8.25	6.77	10.69	7.71	6.09	4.19	2.03	8.39	1.76	3.25	1.22			1.49
Q9Y4X5	E3 ubiquitin-protein ligase ARIH1 OS=Homo sapiens GN=ARIH1 PE=1 SV=2 - [ARI1_HUMAN]	46.14		2.51	11.31	4.13	4.67	7.54	10.77	9.16	6.28			1.8	1.44	1.8	3.95	3.95	2.33		2.15	4.85
P61964	WD repeat-containing protein 5 OS=Homo sapiens GN=WDR5 PE=1 SV=1 - [WDR5_HUMAN]	46.11	7.19			4.19	8.68					3.59		2.4	7.19	8.68	8.68		3.29	14.67		3.29
P08779	Keratin, type I cytoskeletal 16 OS=Homo sapiens GN=KRT16 PE=1 SV=4 - [K1C16_HUMAN]	46.09		4.23	1.48	2.11		2.54	4.86	1.9	3.81	8.25	11.84		9.94	2.11	1.9	7.82	9.09	6.34	6.13	7.4
Q9H3U1-2	Isoform 2 of Protein unc-45 homolog A OS=Homo sapiens GN=UNC45A - [UN45A_HUMAN]	46.07	2.91	3.23	1.08	3.12	3.01	1.08	4.84	4.52	3.77	2.37	2.58	5.81	2.26	1.83	1.08	1.61	5.17	2.37	1.18	4.2
O60869-2	Isoform 2 of Endothelial differentiation-related factor 1 OS=Homo sapiens GN=EDF1 - [EDF1_HUMAN]	46.04	8.63		5.76	5.76							7.19	10.79	7.19	10.79	10.79			5.04	8.63
Q9Y5J1	U3 small nucleolar RNA-associated protein 18 homolog OS=Homo sapiens GN=UTP18 PE=1 SV=3 - [UTP18_HUMAN]	46.04	7.19		1.8	3.24	9.35		5.76	5.94	7.73	3.24	3.78	8.63	13.67	3.24			1.26	5.22	5.58	3.42
Q9UN37	Vacuolar protein sorting-associated protein 4A OS=Homo sapiens GN=VPS4A PE=1 SV=1 - [VPS4A_HUMAN]	46	3.43	9.38	2.75	4.58	4.58		1.6	3.2	7.09	4.12	3.43			7.32		3.66	5.26	2.75
Q6P2Q9	Pre-mRNA-processing-splicing factor 8 OS=Homo sapiens GN=PRPF8 PE=1 SV=2 - [PRP8_HUMAN]	45.95	2.23	4.8	2.14	2.66	5.61	5.01	5.01	2.78	3.17	3.85	3.25	1.46	4.97	5.57	4.75	5.65	6.3	4.03	5.05	5.35
Q92747	Actin-related protein 2/3 complex subunit 1A OS=Homo sapiens GN=ARPC1A PE=1 SV=2 - [ARC1A_HUMAN]	45.95	4.32					5.14	3.78	3.78		3.78	2.7	8.92			10.81	12.97	6.22	10.27	2.16	2.16
H7C399	Cullin-3 (Fragment) OS=Homo sapiens GN=CUL3 PE=3 SV=1 - [H7C399_HUMAN]	45.95		18.02								19.82							17.12	17.12		8.11
Q15004	PCNA-associated factor OS=Homo sapiens GN=KIAA0101 PE=1 SV=1 - [PAF15_HUMAN]	45.95								28.83	16.22		15.32		16.22	17.12
Q96S55-2	Isoform 2 of ATPase WRNIP1 OS=Homo sapiens GN=WRNIP1 - [WRIP1_HUMAN]	45.94	2.97	2.97	1.56	5.63	5.94	1.72			1.88			5.47	1.56	1.88	2.19	5.31	5	4.22	10.47	1.56
Q13287	N-myc-interactor OS=Homo sapiens GN=NMI PE=1 SV=2 - [NMI_HUMAN]	45.93	4.56	6.84			3.91			2.93						3.58	8.47			3.26	5.54	6.84
Q9HAV4	Exportin-5 OS=Homo sapiens GN=XPO5 PE=1 SV=1 - [XPO5_HUMAN]	45.93	0.75	2.74	3.82	2.16	1.66	3.49	5.32	1.5	3.65	5.15	1.08	4.9	2.66	3.82	2.57	7.31	6.4	2.99	2.16	4.9
Q9Y4W6	AFG3-like protein 2 OS=Homo sapiens GN=AFG3L2 PE=1 SV=2 - [AFG32_HUMAN]	45.92	2.13	6.02	4.77	4.77	4.64	5.27	4.02	3.64	9.91	8.03	8.03	1	7.03		1.13	0.88	2.01	2.01	4.52	3.76
Q32P28	Prolyl 3-hydroxylase 1 OS=Homo sapiens GN=LEPRE1 PE=1 SV=2 - [P3H1_HUMAN]	45.92	4.35	1.36	1.36	5.03	1.36	2.04	2.72	6.93	1.63	2.99		10.33		9.92	3.13	2.85	2.85	1.77	5.98
Q9NVE7	Pantothenate kinase 4 OS=Homo sapiens GN=PANK4 PE=1 SV=1 - [PANK4_HUMAN]	45.92	4.79	1.42	4.66	3.23	1.55	3.36	7.63	5.56	0.91	1.42	5.05	1.81	1.42	1.94	4.14	6.86	2.98	2.72	1.68
O00442	RNA 3'-terminal phosphate cyclase OS=Homo sapiens GN=RTCA PE=1 SV=1 - [RTCA_HUMAN]	45.9	5.46	2.73	2.73		3.55			4.37	3.83			12.84	4.64	15.57			6.83	3.83	3.83	2.73
P22307	Non-specific lipid-transfer protein OS=Homo sapiens GN=SCP2 PE=1 SV=2 - [NLTP_HUMAN]	45.89	5.12	6.4	7.5		1.46	4.94	7.68	9.87	5.48	3.66			3.29	5.12	3.66	2.01	7.31	1.83	6.22
Q12765	Secernin-1 OS=Homo sapiens GN=SCRN1 PE=1 SV=2 - [SCRN1_HUMAN]	45.89	2.66	3.86	6.52	10.14				3.14	1.93	1.93	1.93		12.32	3.14		10.87	11.84	7	7.25	7
Q9NWA0	Mediator of RNA polymerase II transcription subunit 9 OS=Homo sapiens GN=MED9 PE=1 SV=1 - [MED9_HUMAN]	45.89			6.16								11.64	12.33			15.75	15.75
Q9Y570	Protein phosphatase methylesterase 1 OS=Homo sapiens GN=PPME1 PE=1 SV=3 - [PPME1_HUMAN]	45.85	2.85			3.37	8.03	4.66	2.07	3.89	5.18	5.18	8.81	3.11	8.81	10.62	5.96	5.96	9.07	2.33	3.11	2.59
J3KS15	Peptidyl-tRNA hydrolase ICT1, mitochondrial (Fragment) OS=Homo sapiens GN=ICT1 PE=4 SV=1 - [J3KS15_HUMAN]	45.83	3.65				5.73			7.29				11.98		11.98		6.77	4.17
O43159	Ribosomal RNA-processing protein 8 OS=Homo sapiens GN=RRP8 PE=1 SV=2 - [RRP8_HUMAN]	45.83				11.62	4.82			1.54		3.51	3.07	4.17		4.17	8.99		10.31	12.28	2.85
Q6P1Q0-4	Isoform 4 of LETM1 domain-containing protein 1 OS=Homo sapiens GN=LETMD1 - [LTMD1_HUMAN]	45.81	6.4			5.42		5.91			6.4	15.76		6.4				6.4	5.42			5.42
H3BT22	Origin recognition complex subunit 6 OS=Homo sapiens GN=ORC6 PE=2 SV=1 - [H3BT22_HUMAN]	45.81			6.9							8.37							19.21		3.94	7.39
Q9NRW7	Vacuolar protein sorting-associated protein 45 OS=Homo sapiens GN=VPS45 PE=1 SV=1 - [VPS45_HUMAN]	45.79	4.74	4.39			7.72	8.42	3.86	5.61		2.46	1.58	4.21	4.21	2.46	1.4	7.54	5.61	5.44	1.93
Q15650	Activating signal cointegrator 1 OS=Homo sapiens GN=TRIP4 PE=1 SV=4 - [TRIP4_HUMAN]	45.78	2.75	3.96		2.75	4.82		4.48	1.38	1.2	5.85	2.58	1.72	3.27	6.71	1.38	3.27	3.1	9.64	1.89
Q9H9T3-2	Isoform 2 of Elongator complex protein 3 OS=Homo sapiens GN=ELP3 - [ELP3_HUMAN]	45.78			3	5.44	1.69	4.32	11.82	1.88	1.88		8.26			1.88	1.88	7.69	7.88
I3L3Q7	Complement component 1 Q subcomponent-binding protein, mitochondrial (Fragment) OS=Homo sapiens GN=C1QBP PE=2 SV=1 - [I3L3Q7_HUMAN]	45.76				23.16	23.16		7.34	7.34						7.91	15.25	15.25	7.34			14.12
P78310	Coxsackievirus and adenovirus receptor OS=Homo sapiens GN=CXADR PE=1 SV=1 - [CXAR_HUMAN]	45.75	3.01		3.84				2.19	10.41					9.59	3.56				8.77	6.85
Q9Y4G6	Talin-2 OS=Homo sapiens GN=TLN2 PE=1 SV=4 - [TLN2_HUMAN]	45.75	5	1.34	2.71	0.87	3.27	4.17	2.44	0.55	3.54	2.05	0.43	3.11	1.1	3.5	2.83	3.15	2.36	5.78	4.13	2.24
Q9H944	Mediator of RNA polymerase II transcription subunit 20 OS=Homo sapiens GN=MED20 PE=1 SV=1 - [MED20_HUMAN]	45.75				4.25	4.72	5.19			14.62	5.19				4.25	12.26
P10606	Cytochrome c oxidase subunit 5B, mitochondrial OS=Homo sapiens GN=COX5B PE=1 SV=2 - [COX5B_HUMAN]	45.74	9.3	8.53		9.3	9.3		14.73					9.3		6.2	6.2		15.5	15.5	14.73	13.95
O60841	Eukaryotic translation initiation factor 5B OS=Homo sapiens GN=EIF5B PE=1 SV=4 - [IF2P_HUMAN]	45.74	6.97	6.56	4.59	4.75	2.38	3.61	6.31	7.46	7.3	4.75	4.34	8.2	4.92	14.75	13.93	7.7	3.77	5.16	5.08	5.74
Q9UPQ0-10	Isoform 10 of LIM and calponin homology domains-containing protein 1 OS=Homo sapiens GN=LIMCH1 - [LIMC1_HUMAN]	45.74	0.95	4.73	2.65	2.46	3.5	5.4	1.23	4.36	2.56	3.69	1.52	4.64	3.98	2.18	1.23	5.78	1.99	5.87	3.41	1.8
Q53HC9	Protein TSSC1 OS=Homo sapiens GN=TSSC1 PE=1 SV=2 - [TSSC1_HUMAN]	45.74		16.28			12.66				3.36	10.34			5.17		2.33	4.39	2.33
Q8N6M0	OTU domain-containing protein 6B OS=Homo sapiens GN=OTUD6B PE=1 SV=1 - [OTU6B_HUMAN]	45.73	3.75	6.14		4.78						7.51	9.56		10.58			3.41		6.14	6.14	4.44
P23368	NAD-dependent malic enzyme, mitochondrial OS=Homo sapiens GN=ME2 PE=1 SV=1 - [MAOM_HUMAN]	45.72	10.96	2.05	2.05		4.11	4.62	7.02	4.79	5.48	7.88	1.71	1.2	3.25				3.42	5.82	4.11
K7ES11	Ubiquitin-conjugating enzyme E2 O (Fragment) OS=Homo sapiens GN=UBE2O PE=4 SV=1 - [K7ES11_HUMAN]	45.72	1.36	2.73	2.73	5.7	5.33		7.19	2.6	2.11	1.98		2.23	2.23	5.45	3.59	5.95	3.47	8.3	8.05	3.84
E9PH62	Double-stranded RNA-binding protein Staufen homolog 2 OS=Homo sapiens GN=STAU2 PE=2 SV=1 - [E9PH62_HUMAN]	45.72	3.16	2.23		4.09	2.04	2.79	2.6	1.86					2.42		5.02	7.25	7.81		5.76	2.6
Q12824	SWI/SNF-related matrix-associated actin-dependent regulator of chromatin subfamily B member 1 OS=Homo sapiens GN=SMARCB1 PE=1 SV=2 - [SNF5_HUMAN]	45.71	3.64	2.34	4.94	10.65	2.6	10.39	14.29		6.75					3.38	3.38	3.38		4.16	7.27	2.34
Q96BW5-2	Isoform 2 of Phosphotriesterase-related protein OS=Homo sapiens GN=PTER - [PTER_HUMAN]	45.7		5.96			3.97	3.97			2.98		11.92	3.31	2.32				3.31	9.6		5.63
Q15843	NEDD8 OS=Homo sapiens GN=NEDD8 PE=1 SV=1 - [NEDD8_HUMAN]	45.68		28.4	17.28	28.4			11.11		17.28						11.11	24.69	11.11	11.11		17.28
O15144	Actin-related protein 2/3 complex subunit 2 OS=Homo sapiens GN=ARPC2 PE=1 SV=1 - [ARPC2_HUMAN]	45.67	18	4.33	7	2.33			10	3.67		3.67		20.67		4		3	6			7.33
Q9H223	EH domain-containing protein 4 OS=Homo sapiens GN=EHD4 PE=1 SV=1 - [EHD4_HUMAN]	45.66	2.77			1.66			1.85	2.22	4.62	3.33	2.03	2.22	1.48	2.22	1.29	10.35	2.03	8.87	6.1
P55795	Heterogeneous nuclear ribonucleoprotein H2 OS=Homo sapiens GN=HNRNPH2 PE=1 SV=1 - [HNRH2_HUMAN]	45.66	2.9		1.78	13.36	9.58	14.48	10.24	10.24	3.79	4.23		7.13	4.23	23.61	13.59	12.03	6.01	4.23	1.78	3.79
E5RHC1	Serine/threonine-protein phosphatase (Fragment) OS=Homo sapiens GN=PPP2CB PE=2 SV=1 - [E5RHC1_HUMAN]	45.65	11.96		11.41	11.41	16.3	8.15	8.15		9.24			7.61		11.41			4.35	4.35		12.5
Q70UQ0-4	Isoform 4 of Inhibitor of nuclear factor kappa-B kinase-interacting protein OS=Homo sapiens GN=IKBIP - [IKIP_HUMAN]	45.62	2.92	11.41	6.63	2.39	2.39	4.77	2.92	2.92	1.86	5.31			11.14			3.18	7.96	4.77		9.02
P62899	60S ribosomal protein L31 OS=Homo sapiens GN=RPL31 PE=1 SV=1 - [RL31_HUMAN]	45.6		11.2			7.2	7.2	11.2	11.2				7.2		7.2		14.4	6.4	5.6
P09429	High mobility group protein B1 OS=Homo sapiens GN=HMGB1 PE=1 SV=3 - [HMGB1_HUMAN]	45.58	6.98	15.81	14.88	8.84	22.33	6.51	29.77	19.07	18.6	13.49	22.33	6.98	15.81	4.65	12.56	27.44	14.42	6.98		15.81
Q86W92-2	Isoform 2 of Liprin-beta-1 OS=Homo sapiens GN=PPFIBP1 - [LIPB1_HUMAN]	45.57	2.69		2.69		2.39	2.29	5.47	2.09	3.48	3.48	2.29	2.29	5.47	1.29	1.79	2.99	2.69	5.97	5.87	4.98
Q13409-2	Isoform 2B of Cytoplasmic dynein 1 intermediate chain 2 OS=Homo sapiens GN=DYNC1I2 - [DC1I2_HUMAN]	45.57	11.23				1.11	5.06	6.49	9.97	10.44			11.87		7.91	4.75	2.85	1.42	1.42	3.01	1.42
O95633-2	Isoform 2 of Follistatin-related protein 3 OS=Homo sapiens GN=FSTL3 - [FSTL3_HUMAN]	45.57	4.22	5.49	5.49				7.59		11.39	13.5				5.06	3.38
Q96B97	SH3 domain-containing kinase-binding protein 1 OS=Homo sapiens GN=SH3KBP1 PE=1 SV=2 - [SH3K1_HUMAN]	45.56		2.56	3.01	4.36	7.22	10.98	6.17	1.35	1.8	1.35	2.11	6.32		4.21	4.81	1.5			3.46	1.65
Q9Y221	60S ribosome subunit biogenesis protein NIP7 homolog OS=Homo sapiens GN=NIP7 PE=1 SV=1 - [NIP7_HUMAN]	45.56			5.56	5.56					10.56	11.11	11.11	5		7.78		18.33	5.56	16.11	10.56
Q00535	Cyclin-dependent kinase 5 OS=Homo sapiens GN=CDK5 PE=1 SV=3 - [CDK5_HUMAN]	45.55	2.74	5.14			2.74		9.25	13.36	2.74		9.25	15.41	3.77					3.77	3.42
P11802	Cyclin-dependent kinase 4 OS=Homo sapiens GN=CDK4 PE=1 SV=2 - [CDK4_HUMAN]	45.54	12.54			4.95	2.64	3.63	3.63	4.95	15.51	5.28	4.29						5.28	5.28
P26447	Protein S100-A4 OS=Homo sapiens GN=S100A4 PE=1 SV=1 - [S10A4_HUMAN]	45.54	7.92	18.81	7.92				8.91	19.8		8.91			18.81	8.91		8.91		10.89		18.81
I3L2Z5	Myc-associated zinc finger protein (Fragment) OS=Homo sapiens GN=MAZ PE=2 SV=1 - [I3L2Z5_HUMAN]	45.54	6.44							8.42	3.47			8.42			4.46	9.41			7.43	5.94
Q9H2D6-5	Isoform 1 of TRIO and F-actin-binding protein OS=Homo sapiens GN=TRIOBP - [TARA_HUMAN]	45.53	1.52	1.18	3.2	3.04	2.87			4.05	6.58		1.52	2.02	3.04	1.85	9.11	2.02	4.89	4.89	3.04	4.89
Q8N6N3-2	Isoform 2 of UPF0690 protein C1orf52 OS=Homo sapiens GN=C1orf52 - [CA052_HUMAN]	45.51		8.38	10.18		7.19	8.38										5.99	5.99		5.39	8.38
P06132	Uroporphyrinogen decarboxylase OS=Homo sapiens GN=UROD PE=1 SV=2 - [DCUP_HUMAN]	45.5	1.63			5.99		3.81	7.36	7.36	4.36		2.45	2.72	1.63	2.72	11.17	10.63		2.72	4.63
P49257	Protein ERGIC-53 OS=Homo sapiens GN=LMAN1 PE=1 SV=2 - [LMAN1_HUMAN]	45.49	11.96	10.2	4.31	6.47	1.57		3.14	3.14	6.08	11.76	2.75	8.24	2.75	3.73	1.37	3.33	7.06	8.63	4.12	6.27
Q9H0S4	Probable ATP-dependent RNA helicase DDX47 OS=Homo sapiens GN=DDX47 PE=1 SV=1 - [DDX47_HUMAN]	45.49		2.2		3.96	4.62	4.84	4.84	4.4	2.2	9.45	2.42	5.49		3.96	2.86	6.15		5.05
Q01105-2	Isoform 2 of Protein SET OS=Homo sapiens GN=SET - [SET_HUMAN]	45.49		20.22	12.27	7.58		11.91			5.05	5.05	5.05		20.58			11.91	14.8	28.52	4.69	18.77
Q9NUL3-7	Isoform 7 of Double-stranded RNA-binding protein Staufen homolog 2 OS=Homo sapiens GN=STAU2 - [STAU2_HUMAN]	45.44	3.37			4.37	2.18	2.98	2.78	1.98					2.58		7.54	4.56	8.33		6.15	2.78
Q6PI48	Aspartate--tRNA ligase, mitochondrial OS=Homo sapiens GN=DARS2 PE=1 SV=1 - [SYDM_HUMAN]	45.43	4.19				1.71	5.43	2.95		2.95	4.5	7.75	2.95	6.36	3.26	4.96	5.43	8.37	5.27		0.93
Q5W111	SPRY domain-containing protein 7 OS=Homo sapiens GN=SPRYD7 PE=1 SV=2 - [SPRY7_HUMAN]	45.41	14.29								4.59				5.1	10.2			7.65			8.67
P30085	UMP-CMP kinase OS=Homo sapiens GN=CMPK1 PE=1 SV=3 - [KCY_HUMAN]	45.41	10.2	19.39	19.9	6.63	6.12							10.2	11.73	10.2	4.08	4.08	4.08	21.43	12.76	13.27
Q13043	Serine/threonine-protein kinase 4 OS=Homo sapiens GN=STK4 PE=1 SV=2 - [STK4_HUMAN]	45.38	2.26	5.75		4.31	3.29		10.27	5.95		7.39		1.85	2.26		1.85			4.93		7.19
O60762	Dolichol-phosphate mannosyltransferase OS=Homo sapiens GN=DPM1 PE=1 SV=1 - [DPM1_HUMAN]	45.38	4.62					6.15		8.85	8.46		4.23		4.23		4.23	10			9.23
P18859	ATP synthase-coupling factor 6, mitochondrial OS=Homo sapiens GN=ATP5J PE=1 SV=1 - [ATP5J_HUMAN]	45.37	13.89	18.52								17.59	13.89		13.89				30.56	44.44	17.59	18.52
P60903	Protein S100-A10 OS=Homo sapiens GN=S100A10 PE=1 SV=2 - [S10AA_HUMAN]	45.36	17.53				10.31	10.31			17.53	17.53	17.53	17.53		7.22
P46781	40S ribosomal protein S9 OS=Homo sapiens GN=RPS9 PE=1 SV=3 - [RS9_HUMAN]	45.36	3.61	19.07	15.46	17.53			9.79	9.79	12.89	12.89	8.76		15.98	8.76	5.15			22.16	10.31	19.07
G3XAK0	Glutathione S-transferase theta 1, isoform CRA_f OS=Homo sapiens GN=GSTT1 PE=2 SV=1 - [G3XAK0_HUMAN]	45.36		13.4					9.28	6.19			15.46	16.49
Q96GQ7	Probable ATP-dependent RNA helicase DDX27 OS=Homo sapiens GN=DDX27 PE=1 SV=2 - [DDX27_HUMAN]	45.35	5.65	5.4		4.52	2.26	2.26	5.28	1.13	0.88	3.14	1.26	1.38	2.64		3.77	8.17	6.16	7.16	3.14	3.52
Q00839	Heterogeneous nuclear ribonucleoprotein U OS=Homo sapiens GN=HNRNPU PE=1 SV=6 - [HNRPU_HUMAN]	45.33	10.67	9.94	14.79	5.21	4	9.58	9.45	8.61	7.03	6.42	2.18	12.12	10.06	7.15	8.97	9.45	8.48	13.58	19.88	8.48
Q9NY33	Dipeptidyl peptidase 3 OS=Homo sapiens GN=DPP3 PE=1 SV=2 - [DPP3_HUMAN]	45.32	7.46	10.85	5.83	2.04		2.44	2.44			2.99	4.75	6.51	9.91	1.09		6.65	7.19	3.93	2.85	6.24
Q9GZT6-2	Isoform 2 of Coiled-coil domain-containing protein 90B, mitochondrial OS=Homo sapiens GN=CCDC90B - [CC90B_HUMAN]	45.31	4.08	8.16			8.16				8.57				9.39		9.8			7.35		10.61
Q9BTU6	Phosphatidylinositol 4-kinase type 2-alpha OS=Homo sapiens GN=PI4K2A PE=1 SV=1 - [P4K2A_HUMAN]	45.3	2.51		2.3			7.52	5.01		2.71	2.71				6.05		2.51		3.55	6.89	10.44
Q13618-2	Isoform 2 of Cullin-3 OS=Homo sapiens GN=CUL3 - [CUL3_HUMAN]	45.3	1.21	2.69	1.21	3.23	3.63	5.11	2.02	7.12	4.17	4.03	3.63	4.44	3.09	5.51	1.75	1.61	3.9	2.55	1.75	3.09
O75306-2	Isoform 2 of NADH dehydrogenase [ubiquinone] iron-sulfur protein 2, mitochondrial OS=Homo sapiens GN=NDUFS2 - [NDUS2_HUMAN]	45.3		4.16	4.16		4.38	2.63	2.63	2.63	2.41	4.16	7	7.88	1.53	6.78	3.72		8.1			6.56
P09110	3-ketoacyl-CoA thiolase, peroxisomal OS=Homo sapiens GN=ACAA1 PE=1 SV=2 - [THIK_HUMAN]	45.28			4.25			4.72		7.08	7.31	2.36		7.55		7.55	7.08		2.59	3.54	6.13	4.72
Q9Y608-2	Isoform 2 of Leucine-rich repeat flightless-interacting protein 2 OS=Homo sapiens GN=LRRFIP2 - [LRRF2_HUMAN]	45.25	11.25	3.75	3	3							3.25	4.25	6.75	8.75	4.75	5.75				5
O95671	N-acetylserotonin O-methyltransferase-like protein OS=Homo sapiens GN=ASMTL PE=1 SV=3 - [ASML_HUMAN]	45.25	2.74	1.45	3.7	3.7	6.76	4.19		1.93		5.96	5.96	4.83	6.44	0.97	2.74	1.77	3.06	9.02	5.64	1.93
O14745	Na(+)/H(+) exchange regulatory cofactor NHE-RF1 OS=Homo sapiens GN=SLC9A3R1 PE=1 SV=4 - [NHRF1_HUMAN]	45.25			2.79	2.79	2.23	4.75		2.51		5.59	9.5	7.26	7.82	9.5	3.63	5.59	4.75	3.91	8.66
O95782-2	Isoform B of AP-2 complex subunit alpha-1 OS=Homo sapiens GN=AP2A1 - [AP2A1_HUMAN]	45.24	7.85			3.66	7.02	3.56	3.35	0.94	3.04	2.09		3.77	3.25	5.45	2.72	4.82	5.65	3.87	3.87	0.94
Q9BZZ5-2	Isoform 2 of Apoptosis inhibitor 5 OS=Homo sapiens GN=API5 - [API5_HUMAN]	45.24	5.56	4.17	3.17	1.59	2.38	8.13	9.52	9.13	6.35	4.76	4.17	1.98	5.16	1.98	1.59	4.37	3.57	5.56	3.57	4.76
Q96GK7	Fumarylacetoacetate hydrolase domain-containing protein 2A OS=Homo sapiens GN=FAHD2A PE=1 SV=1 - [FAH2A_HUMAN]	45.22			2.23	11.78						5.41		4.78				7.64	4.14	7.64	5.73
Q15050	Ribosome biogenesis regulatory protein homolog OS=Homo sapiens GN=RRS1 PE=1 SV=2 - [RRS1_HUMAN]	45.21	3.56	5.21				1.92	12.33	9.86	3.56	7.12	3.56		2.19	6.03	4.66	4.66			3.29	9.32
Q9NR30	Nucleolar RNA helicase 2 OS=Homo sapiens GN=DDX21 PE=1 SV=5 - [DDX21_HUMAN]	45.21	10.09	8.3	2.94	1.66	4.85	4.98	3.83	4.85	4.85	7.79	3.96	6.39	5.36	1.66	1.66	1.66	5.87	11.75	11.88	6.9
P19338	Nucleolin OS=Homo sapiens GN=NCL PE=1 SV=3 - [NUCL_HUMAN]	45.21	12.39	14.93	9.58	9.72	10.28	9.15	7.32	9.86	5.21	4.08	4.93	8.87	11.69	9.44	7.04	7.89	10.56	21.55	16.9	20.28
P01891	HLA class I histocompatibility antigen, A-68 alpha chain OS=Homo sapiens GN=HLA-A PE=1 SV=4 - [1A68_HUMAN]	45.21			4.38	4.38	6.58	11.78	14.25	11.23	4.38	17.81	10.96	4.38	11.51	13.42	8.22	14.79	4.38	7.67	3.29
Q9H8H0	Nucleolar protein 11 OS=Homo sapiens GN=NOL11 PE=1 SV=1 - [NOL11_HUMAN]	45.2	12.1		2.64			0.97		6.54	3.06	1.11	1.11	4.45	4.17	1.25	3.06	5.01	3.34	6.4	3.06	1.81
E9PJ04	Splicing factor 3B subunit 2 (Fragment) OS=Homo sapiens GN=SF3B2 PE=2 SV=1 - [E9PJ04_HUMAN]	45.2	11.86	4.24	5.08		11.58	12.15				2.54	4.24	10.73	4.24	7.91	5.65	5.65		4.24
P49005	DNA polymerase delta subunit 2 OS=Homo sapiens GN=POLD2 PE=1 SV=1 - [DPOD2_HUMAN]	45.2		8.74		4.48			6.61			2.56	7.04	2.13	5.76	2.99		1.92	4.9			3.62
Q9UQE7	Structural maintenance of chromosomes protein 3 OS=Homo sapiens GN=SMC3 PE=1 SV=2 - [SMC3_HUMAN]	45.19	8.46	4.19	4.52	5.01	3.37		4.44	4.6	4.68		3.04	8.46	3.12	5.83	4.77	4.03	4.68	3.45	9.7	6.41
Q9H9A6	Leucine-rich repeat-containing protein 40 OS=Homo sapiens GN=LRRC40 PE=1 SV=1 - [LRC40_HUMAN]	45.18	1.66		5.48	4.15		5.98	3.32	1.33		1.66	2.99		1.66	5.98	3.49	2.99	1.83	2.99	5.48
P39656	Dolichyl-diphosphooligosaccharide--protein glycosyltransferase 48 kDa subunit OS=Homo sapiens GN=DDOST PE=1 SV=4 - [OST48_HUMAN]	45.18	3.07	6.36	9.65		3.29	3.29	5.48	5.48				3.07	17.98	8.11	9.65	4.39	4.39			7.89
Q6P2E9	Enhancer of mRNA-decapping protein 4 OS=Homo sapiens GN=EDC4 PE=1 SV=1 - [EDC4_HUMAN]	45.18	1.21	4.21	6.42	3.71	8.07	6.57	3.71	4	3.35	2.36	2.36	0.71	0.57	1.57	2.21	4.28	3.71	4.78	1.71	2.43
K7EK43	Tubulin beta-6 chain (Fragment) OS=Homo sapiens GN=TUBB6 PE=4 SV=1 - [K7EK43_HUMAN]	45.16	45.16		45.16		45.16	45.16	45.16	45.16				45.16	45.16			45.16
M0QX35	Paf1, RNA polymerase II associated factor, homolog (S. cerevisiae), isoform CRA_c OS=Homo sapiens GN=PAF1 PE=4 SV=1 - [M0QX35_HUMAN]	45.15	5.57	4.54	7.42				2.27	3.51		6.6	3.71	15.05	2.68			8.45	4.54	4.33	2.27	2.47
Q9BQ04	RNA-binding protein 4B OS=Homo sapiens GN=RBM4B PE=1 SV=1 - [RBM4B_HUMAN]	45.13	3.34		10.31	3.62	2.23						7.8	2.51	3.34	2.79	5.29	9.75	10.58
Q15276	Rab GTPase-binding effector protein 1 OS=Homo sapiens GN=RABEP1 PE=1 SV=2 - [RABE1_HUMAN]	45.13	6.03	5.8		3.6	2.2	1.86	1.16	1.16		2.78	1.28	1.04	6.03	1.97	4.18	2.55	3.36	3.36	4.76	3.13
P29218	Inositol monophosphatase 1 OS=Homo sapiens GN=IMPA1 PE=1 SV=1 - [IMPA1_HUMAN]	45.13			6.86		2.89		3.97		3.61	17.69	6.86				4.69		3.25		9.03	7.58
P36404	ADP-ribosylation factor-like protein 2 OS=Homo sapiens GN=ARL2 PE=1 SV=4 - [ARL2_HUMAN]	45.11	9.78	9.78			10.33				6.52			9.78	7.07	5.43	5.43	5.98	5.98
Q9NUJ1	Mycophenolic acid acyl-glucuronide esterase, mitochondrial OS=Homo sapiens GN=ABHD10 PE=1 SV=1 - [ABHDA_HUMAN]	45.1	3.59	14.71	5.56	5.56		6.54	9.48	7.84					11.76				5.56		3.59	5.56
P37837	Transaldolase OS=Homo sapiens GN=TALDO1 PE=1 SV=2 - [TALDO_HUMAN]	45.1	3.56	2.08	2.08	3.26		3.26	3.56	7.42	15.73	13.35	8.61	9.2		12.17	12.17	12.46	11.57	8.9	9.5	2.08
P68032	Actin, alpha cardiac muscle 1 OS=Homo sapiens GN=ACTC1 PE=1 SV=1 - [ACTC_HUMAN]	45.09	20.95	18.04	19.63	14.32	22.02	26.79	22.81	19.89	23.87	26.79	18.04	15.65	19.36	19.1	13.53	19.63	13	19.1	19.89	16.71
Q16851	UTP--glucose-1-phosphate uridylyltransferase OS=Homo sapiens GN=UGP2 PE=1 SV=5 - [UGPA_HUMAN]	45.08	2.36	4.33	4.53	6.89	6.89	13.39	5.12	12.01	11.02	10.83	4.33		6.89	2.36			7.28	1.97	7.28	4.33
Q92522	Histone H1x OS=Homo sapiens GN=H1FX PE=1 SV=1 - [H1X_HUMAN]	45.07	15.49					7.04	12.21	5.16	12.21	7.04	7.04	8.45	12.68	12.21	20.19	14.08	14.08	12.68
Q9H1K1-2	Isoform 2 of Iron-sulfur cluster assembly enzyme ISCU, mitochondrial OS=Homo sapiens GN=ISCU - [ISCU_HUMAN]	45.07					8.45				13.38	17.61	17.61
O75937	DnaJ homolog subfamily C member 8 OS=Homo sapiens GN=DNAJC8 PE=1 SV=2 - [DNJC8_HUMAN]	45.06			24.11	13.44	3.56								11.46	3.16				6.72	6.32	6.32
P28799	Granulins OS=Homo sapiens GN=GRN PE=1 SV=2 - [GRN_HUMAN]	45.03	2.87	8.09	4.89	6.75	2.7	2.7			3.88	2.19	2.19	11.64		2.02	3.04	7.93	3.88			2.36
Q9BXJ9	N-alpha-acetyltransferase 15, NatA auxiliary subunit OS=Homo sapiens GN=NAA15 PE=1 SV=1 - [NAA15_HUMAN]	45.03	4.73	6.47	2.42	4.39	3.46	6.47	8.31	4.97	3.35	1.04	6.12	3.93	6.47	2.89	6.24	9.82	10.05	3.12	3.23	5.31
O43252	Bifunctional 3'-phosphoadenosine 5'-phosphosulfate synthase 1 OS=Homo sapiens GN=PAPSS1 PE=1 SV=2 - [PAPS1_HUMAN]	45.03			3.04		5.45	3.21	5.45	6.09	4.33	10.58	3.53	3.04	4.81	8.33	5.45	4.33		1.92	1.92
O75530-3	Isoform 3 of Polycomb protein EED OS=Homo sapiens GN=EED - [EED_HUMAN]	45	2.25	6.25	2.75	5.5				6.75	3.25	2.25	2.25		2.75	5.25			5.75	3.25	2.25
O00178	GTP-binding protein 1 OS=Homo sapiens GN=GTPBP1 PE=1 SV=3 - [GTPB1_HUMAN]	44.99	2.09					3.89	4.04	7.17	6.13	8.37	5.83	3.59	4.78	4.19	5.08	1.2		1.79
Q14684	Ribosomal RNA processing protein 1 homolog B OS=Homo sapiens GN=RRP1B PE=1 SV=3 - [RRP1B_HUMAN]	44.99	3.56	5.01	1.85	7.92	6.2	2.11		5.54	2.24	1.58	1.58		1.58	1.98	6.33	3.96	3.03	2.37	8.71	8.84
B4DHN4	Alpha-ketoglutarate-dependent dioxygenase FTO OS=Homo sapiens GN=FTO PE=2 SV=1 - [B4DHN4_HUMAN]	44.98			7.18		3.83	6.22	6.22						16.27			14.83	13.88	9.57
Q16543	Hsp90 co-chaperone Cdc37 OS=Homo sapiens GN=CDC37 PE=1 SV=1 - [CDC37_HUMAN]	44.97	11.11	7.41	6.61	7.41	4.5			2.91			5.29	5.56	7.94	5.82	5.82	7.94				10.05
Q9H6K1	Uncharacterized protein C6orf106 OS=Homo sapiens GN=C6orf106 PE=1 SV=2 - [CF106_HUMAN]	44.97			6.04		14.09	4.7			5.37								5.03	7.72		6.71
Q8TEX9	Importin-4 OS=Homo sapiens GN=IPO4 PE=1 SV=2 - [IPO4_HUMAN]	44.96	0.65	4.26	3.7	6.01	11.47	2.78	4.53	8.23	4.72	1.39	3.52	0.65	3.52	2.41	2.13	2.68	3.52	6.57	4.81	4.53
O60684	Importin subunit alpha-7 OS=Homo sapiens GN=KPNA6 PE=1 SV=1 - [IMA7_HUMAN]	44.96	9.14	6.53		5.41	4.66	5.6	5.6	6.16	6.53	8.21	2.05	10.26	1.68	2.61		3.36	1.68	1.68	1.87	8.4
P62913	60S ribosomal protein L11 OS=Homo sapiens GN=RPL11 PE=1 SV=2 - [RL11_HUMAN]	44.94	14.61	7.87	6.74	6.74		7.87	24.16	20.22	20.79	5.06	5.06	14.61	7.87	14.61	7.87		7.3	15.17	5.06	7.87
Q6PJT7-9	Isoform 9 of Zinc finger CCCH domain-containing protein 14 OS=Homo sapiens GN=ZC3H14 - [ZC3HE_HUMAN]	44.93		3.84	2.19	4.79	3.97	7.4	7.67	5.07	2.19		1.1	1.37	4.79	3.29	6.44	1.92		5.21	8.9	3.84
P40925	Malate dehydrogenase, cytoplasmic OS=Homo sapiens GN=MDH1 PE=1 SV=4 - [MDHC_HUMAN]	44.91	7.19	7.19	12.57	9.88	7.78			6.89	15.57	8.68	7.19		6.59	2.69	7.78	7.78	5.39	7.49	5.39	4.49
Q15397	Pumilio domain-containing protein KIAA0020 OS=Homo sapiens GN=KIAA0020 PE=1 SV=3 - [K0020_HUMAN]	44.91	2.47	4.17	2.78	2.62	1.54	5.71	12.19	7.1	1.08		1.23	1.23	6.33	1.23	9.1	1.39	3.86	3.86	3.86	3.7
P51570	Galactokinase OS=Homo sapiens GN=GALK1 PE=1 SV=1 - [GALK1_HUMAN]	44.9	2.81	4.59	4.85		7.4	7.14		4.85	3.32	5.61	4.08		6.12				3.06	5.36		7.4
Q9BTE6	Alanyl-tRNA editing protein Aarsd1 OS=Homo sapiens GN=AARSD1 PE=1 SV=2 - [AASD1_HUMAN]	44.9	9.95		1.94	6.07	6.55		3.16	4.37	2.67			1.7							8.5
O95400	CD2 antigen cytoplasmic tail-binding protein 2 OS=Homo sapiens GN=CD2BP2 PE=1 SV=1 - [CD2B2_HUMAN]	44.87		3.23			3.52		6.45	19.65	2.93		5.87			7.33	7.33			3.23	3.23	12.32
Q8NCF5	NFATC2-interacting protein OS=Homo sapiens GN=NFATC2IP PE=1 SV=1 - [NF2IP_HUMAN]	44.87		4.77	5.25		4.06			6.68		6.68				4.06			7.4	2.39	10.02
Q9UPT5-6	Isoform 6 of Exocyst complex component 7 OS=Homo sapiens GN=EXOC7 - [EXOC7_HUMAN]	44.84	3.68		1.27	2.69	2.26	1.7	1.13	5.8	4.53		6.51	1.84	5.09	3.54	3.39	2.83	1.41		5.66
Q96IX5	Up-regulated during skeletal muscle growth protein 5 OS=Homo sapiens GN=USMG5 PE=1 SV=1 - [USMG5_HUMAN]	44.83		27.59					17.24									25.86	25.86			27.59
Q15819	Ubiquitin-conjugating enzyme E2 variant 2 OS=Homo sapiens GN=UBE2V2 PE=1 SV=4 - [UB2V2_HUMAN]	44.83			13.79	6.9		6.21	6.21	11.72	6.21	6.21		4.83		14.48	14.48
P14866	Heterogeneous nuclear ribonucleoprotein L OS=Homo sapiens GN=HNRNPL PE=1 SV=2 - [HNRPL_HUMAN]	44.82	10.87	11.54	1.87	5.6	4.41	9	11.54	4.41	8.49	11.54	10.7	3.4	10.87	6.28	11.04	7.98	6.28	11.88	15.11	12.9
E9PC74	Translation initiation factor eIF-2B subunit epsilon OS=Homo sapiens GN=EIF2B5 PE=2 SV=1 - [E9PC74_HUMAN]	44.82	2.7	2.84		6.81	4.54	6.67	9.93	4.26	4.26	5.39	1.7	3.83		4.68	3.69		1.42	3.4	4.11	2.98
O95630	STAM-binding protein OS=Homo sapiens GN=STAMBP PE=1 SV=1 - [STABP_HUMAN]	44.81	7.78		4.72		4.01	8.02	2.83			3.77		4.72	2.83		3.07		2.36		6.6
Q15003	Condensin complex subunit 2 OS=Homo sapiens GN=NCAPH PE=1 SV=3 - [CND2_HUMAN]	44.8	3.1	6.61			3.24	9.45	2.83	1.35		1.62	4.72		6.61	1.35	6.88	6.75	5.13	3.24		2.29
Q15814	Tubulin-specific chaperone C OS=Homo sapiens GN=TBCC PE=1 SV=2 - [TBCC_HUMAN]	44.8	3.76	7.8				2.31		8.67	2.6			10.4				2.31			6.94	6.94
Q14108-2	Isoform 2 of Lysosome membrane protein 2 OS=Homo sapiens GN=SCARB2 - [SCRB2_HUMAN]	44.78	9.25			2.69	3.28	2.99			3.58	5.67	8.96	5.97	15.52				2.69
Q96ER9	Coiled-coil domain-containing protein 51 OS=Homo sapiens GN=CCDC51 PE=1 SV=2 - [CCD51_HUMAN]	44.77	6.33	4.14		1.7	8.52	3.16	3.89	2.92	7.3	8.52	2.43	3.41	3.41			5.35	8.03			2.43
Q9BV44	THUMP domain-containing protein 3 OS=Homo sapiens GN=THUMPD3 PE=1 SV=1 - [THUM3_HUMAN]	44.77	6.71	8.09		3.94	9.86				4.54			1.38	8.28		2.17	1.58	4.54
P56589	Peroxisomal biogenesis factor 3 OS=Homo sapiens GN=PEX3 PE=1 SV=1 - [PEX3_HUMAN]	44.77				12.6		4.83			3.75	2.14	4.56		4.56		2.95			9.12		4.83
Q15642	Cdc42-interacting protein 4 OS=Homo sapiens GN=TRIP10 PE=1 SV=3 - [CIP4_HUMAN]	44.76	3.83	1.83	1.83	4.16	4.16	4.16	4.99	3.49	5.99	8.99		1.83	5.16	3.49		3.49	3.99			1.83
P45984-2	Isoform Alpha-1 of Mitogen-activated protein kinase 9 OS=Homo sapiens GN=MAPK9 - [MK09_HUMAN]	44.76	8.12	2.88		3.66				6.81	6.81		2.36		2.36			4.19	4.19	6.81	3.14	2.88
O00712	Nuclear factor 1 B-type OS=Homo sapiens GN=NFIB PE=1 SV=2 - [NFIB_HUMAN]	44.76		6.67	5.48	3.1		3.33	4.29	2.62	7.86					3.33	3.33	5.71	5.48	8.1	2.62
Q8N163	DBIRD complex subunit KIAA1967 OS=Homo sapiens GN=KIAA1967 PE=1 SV=2 - [K1967_HUMAN]	44.75	4.88	2.93	1.41	4.01		1.95	0.87	2.06	8.34	4.66	6.18	3.58	3.03	1.52		1.52	4.98	2.06	0.76	6.28
P46108	Adapter molecule crk OS=Homo sapiens GN=CRK PE=1 SV=2 - [CRK_HUMAN]	44.74	6.25	2.63		4.93	4.93	5.59	5.59		9.54			2.96	5.26	10.86	11.18	9.21	3.95	5.59	5.59
O14908	PDZ domain-containing protein GIPC1 OS=Homo sapiens GN=GIPC1 PE=1 SV=2 - [GIPC1_HUMAN]	44.74	4.2	9.31		5.11					4.8			3.6	4.5	8.11	4.5	4.5	9.61	6.31	14.71	13.21
Q96D46	60S ribosomal export protein NMD3 OS=Homo sapiens GN=NMD3 PE=1 SV=1 - [NMD3_HUMAN]	44.73	6.16		1.99		2.78	9.94			5.57					4.37	2.58	3.38		12.33	3.98	5.17
P09661	U2 small nuclear ribonucleoprotein A' OS=Homo sapiens GN=SNRPA1 PE=1 SV=2 - [RU2A_HUMAN]	44.71	5.1	3.53	4.71	4.31	4.31	5.1	9.8	5.1	5.49	15.29	11.37	9.8	10.2	6.67		9.02	5.49			3.53
A0MZ66	Shootin-1 OS=Homo sapiens GN=KIAA1598 PE=1 SV=4 - [SHOT1_HUMAN]	44.69	9.83	1.58	3.17			2.38	1.74	6.66	4.91	4.91	3.33	6.18		3.33		5.39	9.03	1.74	3.49	1.58
Q5JPE7-2	Isoform 2 of Nodal modulator 2 OS=Homo sapiens GN=NOMO2 - [NOMO2_HUMAN]	44.68	3.76	7.61	4.42	1.72	2.05	1.15	4.83	1.72	2.78	3.52	2.54	3.6	7.69	6.14	2.78	4.58	3.68	2.29	1.39	3.27
A0AVT1	Ubiquitin-like modifier-activating enzyme 6 OS=Homo sapiens GN=UBA6 PE=1 SV=1 - [UBA6_HUMAN]	44.68	1.81	1.33	2.38	0.95	1.24	5.13	7.03	4.28	2.28	0.95	1.71		2.66	2.95	2.09	8.56	5.13	4.47	3.9
Q92878	DNA repair protein RAD50 OS=Homo sapiens GN=RAD50 PE=1 SV=1 - [RAD50_HUMAN]	44.66	2.13	1.45	4.65	0.99	5.56	3.43	1.3	2.29	2.13	2.97	2.13	4.57	1.22	3.66	2.36	2.21	5.26	4.27	3.43	4.57
Q5JSH3-2	Isoform 2 of WD repeat-containing protein 44 OS=Homo sapiens GN=WDR44 - [WDR44_HUMAN]	44.64	10.5	3.31		5.41	1.22	8.84	4.2	3.65	1.55	2.65	1.33	2.21	1.33	1.44	1.44			1.66	2.87	6.3
B4DT77	Annexin OS=Homo sapiens GN=ANXA7 PE=2 SV=1 - [B4DT77_HUMAN]	44.64	5.06	4.46		13.69	11.61	9.23	4.46		4.76	4.76	8.04	11.01	8.04	6.25		2.98	3.27	7.74	5.36	5.36
O00471	Exocyst complex component 5 OS=Homo sapiens GN=EXOC5 PE=1 SV=1 - [EXOC5_HUMAN]	44.63	1.55	0.99	3.11			6.64	3.11	2.68	1.84	5.37	5.23	0.99	2.54	2.68	1.27	1.27	1.13	3.67		3.11
A1L0T0	Acetolactate synthase-like protein OS=Homo sapiens GN=ILVBL PE=1 SV=2 - [ILVBL_HUMAN]	44.62		7.91	3.01	5.22	3.01	3.64	2.37		9.97	1.42	6.8	8.7	1.42	5.85		2.69				1.74
B4DFN6	2',3'-cyclic-nucleotide 3'-phosphodiesterase OS=Homo sapiens GN=CNP PE=2 SV=1 - [B4DFN6_HUMAN]	44.62		13.98	13.98	9.68	12.37	7.53			12.9	17.2	15.05		15.05		6.99		4.3
Q14790-2	Isoform 2 of Caspase-8 OS=Homo sapiens GN=CASP8 - [CASP8_HUMAN]	44.61	12.07		6.25						4.74			4.53			9.48	6.9		4.96
M0QXN9	KxDL motif-containing protein 1 (Fragment) OS=Homo sapiens GN=KXD1 PE=4 SV=1 - [M0QXN9_HUMAN]	44.59													20.27	24.32
Q8WW22	DnaJ homolog subfamily A member 4 OS=Homo sapiens GN=DNAJA4 PE=1 SV=1 - [DNJA4_HUMAN]	44.58	5.54			6.05	3.27							8.06	5.54	1.76	3.02		3.53	8.56	7.05	4.79
B4DX52	DnaJ homolog subfamily B member 1 OS=Homo sapiens GN=DNAJB1 PE=2 SV=1 - [B4DX52_HUMAN]	44.58		3.75	7.5			4.58		5	5	6.67	10.83		9.17	4.58	4.58	4.17	17.08	4.17	8.33
Q5H9R7-2	Isoform 2 of Serine/threonine-protein phosphatase 6 regulatory subunit 3 OS=Homo sapiens GN=PPP6R3 - [PP6R3_HUMAN]	44.52	6.57		1.15	2.42	8.65	6.23	6	7.84	5.54	3.58	1.96	4.84		9.46	4.04	1.73	4.27	1.73	1.04
Q92599-2	Isoform 2 of Septin-8 OS=Homo sapiens GN=SEPT8 - [SEPT8_HUMAN]	44.52		2.1	2.1	1.86	5.83	6.76	4.66	4.66	13.29	8.16	6.06	2.56		3.96	2.1		2.1	2.1	8.86	2.1
Q9Y5S9-2	Isoform 2 of RNA-binding protein 8A OS=Homo sapiens GN=RBM8A - [RBM8A_HUMAN]	44.51	4.62			15.03	28.9				4.62	4.62		4.62	4.62		6.36
Q9Y4E1-2	Isoform 2 of WASH complex subunit FAM21C OS=Homo sapiens GN=FAM21C - [FA21C_HUMAN]	44.5	3.82	3.82	3.51	2.52	1.37	7.71	4.2	1.83		1.83	2.6	0.99	0.99	1.83	2.21	4.05	3.89	1.68	3.51	6.03
P10301	Ras-related protein R-Ras OS=Homo sapiens GN=RRAS PE=1 SV=1 - [RRAS_HUMAN]	44.5		5.5			12.39	5.05		9.17			16.51		9.17		6.88	6.88				5.5
Q9BZE4	Nucleolar GTP-binding protein 1 OS=Homo sapiens GN=GTPBP4 PE=1 SV=3 - [NOG1_HUMAN]	44.48	7.73	2.05	2.05		3.63	4.42	5.99	1.42	3.94	1.58	1.58	8.36	7.41	2.84	3.79	2.37	4.42	5.21	3.63	2.52
Q13085	Acetyl-CoA carboxylase 1 OS=Homo sapiens GN=ACACA PE=1 SV=2 - [ACACA_HUMAN]	44.46	0.98	2.26	1.07	1.11	3.84	1.62	4.05	2.64	7.25	7.25	3.32	1.07	2.47	0.81	2.22	3.92	2.05	6.31	1.92	1.75
P49770	Translation initiation factor eIF-2B subunit beta OS=Homo sapiens GN=EIF2B2 PE=1 SV=3 - [EI2BB_HUMAN]	44.44	4.56	3.7	6.27	3.7	3.7	4.56	7.41			9.97	11.97	7.69	1.99	5.13		7.98	3.99			3.7
Q9Y478	5'-AMP-activated protein kinase subunit beta-1 OS=Homo sapiens GN=PRKAB1 PE=1 SV=4 - [AAKB1_HUMAN]	44.44	10	4.81							5.93	4.07	5.56		10	7.04		5.93	12.59
K7EJB5	Small nuclear ribonucleoprotein Sm D2 OS=Homo sapiens GN=SNRPD2 PE=4 SV=1 - [K7EJB5_HUMAN]	44.44	31.48		12.96									31.48	31.48	16.67	16.67
E2PSN0	RNA-binding protein 26 (Fragment) OS=Homo sapiens GN=RBM26 PE=2 SV=1 - [E2PSN0_HUMAN]	44.44		22.22		8.19			7.6	7.6							7.02	13.45	6.43
K7EIN2	Protein syndesmos (Fragment) OS=Homo sapiens GN=NUDT16L1 PE=4 SV=1 - [K7EIN2_HUMAN]	44.44		5.56			9.09			8.59	8.59					7.07	5.56	5.56				5.56
Q9NZ45	CDGSH iron-sulfur domain-containing protein 1 OS=Homo sapiens GN=CISD1 PE=1 SV=1 - [CISD1_HUMAN]	44.44						12.04	12.04		8.33		13.89		13.89	9.26					10.19	13.89
Q6P6C2	RNA demethylase ALKBH5 OS=Homo sapiens GN=ALKBH5 PE=1 SV=2 - [ALKB5_HUMAN]	44.42	14.21	4.31	8.88			2.54		2.54			3.81	2.79	14.97							2.54
Q9UJW0	Dynactin subunit 4 OS=Homo sapiens GN=DCTN4 PE=1 SV=1 - [DCTN4_HUMAN]	44.35	10.22		1.74				1.96		5.43	3.7	6.09	6.52	6.74	1.52	3.04			5.87		1.74
Q68E01-2	Isoform 2 of Integrator complex subunit 3 OS=Homo sapiens GN=INTS3 - [INT3_HUMAN]	44.34	4.89	4.32	4.99	0.77	8.83		6.05	5.66	2.78	4.61		1.44	2.02	3.45	1.92	2.88	4.7	2.21	6.05	5.09
Q9H3Z4-2	Isoform 2 of DnaJ homolog subfamily C member 5 OS=Homo sapiens GN=DNAJC5 - [DNJC5_HUMAN]	44.31			10.18	10.18		9.58	14.97	18.56	10.18	10.18					8.98	8.98
Q8WUK0	Phosphatidylglycerophosphatase and protein-tyrosine phosphatase 1 OS=Homo sapiens GN=PTPMT1 PE=1 SV=1 - [PTPM1_HUMAN]	44.28	3.98				9.45		5.97	20.9	6.47		6.47				4.48					4.98
Q9UH65	Switch-associated protein 70 OS=Homo sapiens GN=SWAP70 PE=1 SV=1 - [SWP70_HUMAN]	44.27	3.59		3.76	7.52	5.98		5.3	1.2			3.08	8.38	4.1	3.25	2.74		6.84	1.88		3.76
Q16851-2	Isoform 2 of UTP--glucose-1-phosphate uridylyltransferase OS=Homo sapiens GN=UGP2 - [UGPA_HUMAN]	44.27	2.41	4.43	1.61	4.02	7.04	13.68	5.23	12.27	11.27	11.07	3.02		7.04	2.41	2.62	2.62	7.44	2.01	7.44	4.43
Q9P2I0	Cleavage and polyadenylation specificity factor subunit 2 OS=Homo sapiens GN=CPSF2 PE=1 SV=2 - [CPSF2_HUMAN]	44.25	2.69	1.41		2.69	1.53	6.14	1.15	9.34	1.15	1.15	3.2		2.56		2.94		1.66	4.86	9.21	3.71
Q86UY5	Protein FAM83A OS=Homo sapiens GN=FAM83A PE=1 SV=1 - [FA83A_HUMAN]	44.24	3.69	5.53	3.92	3.92	5.99	3		11.75				2.53		2.53	7.37				2.07	5.53
Q96I59	Probable asparagine--tRNA ligase, mitochondrial OS=Homo sapiens GN=NARS2 PE=1 SV=3 - [SYNM_HUMAN]	44.23	5.66	6.5	3.56				6.71	3.98		2.52	8.6	2.52	3.14	8.6	1.47	1.89	8.39	5.66		1.89
P78560	Death domain-containing protein CRADD OS=Homo sapiens GN=CRADD PE=1 SV=1 - [CRADD_HUMAN]	44.22	6.03		5.53		7.04	7.04	8.54						8.04				7.04			8.04
O95219	Sorting nexin-4 OS=Homo sapiens GN=SNX4 PE=1 SV=1 - [SNX4_HUMAN]	44.22	8.67	7.11				6	2.67	1.78					7.11	2.22		8.22		7.33		2
O95793-3	Isoform 3 of Double-stranded RNA-binding protein Staufen homolog 1 OS=Homo sapiens GN=STAU1 - [STAU1_HUMAN]	44.22	7.17		2.79			4.18	7.17	2.39	9.96	4.18					4.98	1.59	6.18	6.77
Q9H0A0	N-acetyltransferase 10 OS=Homo sapiens GN=NAT10 PE=1 SV=2 - [NAT10_HUMAN]	44.2	1.95	3.71	3.02	3.12	2.34	7.61	2.15	6.93	1.76	1.56	6.93	4.88	5.07	4.98	2.44	1.46	1.46	3.8	2.54	0.88
O95168-2	Isoform 2 of NADH dehydrogenase [ubiquinone] 1 beta subcomplex subunit 4 OS=Homo sapiens GN=NDUFB4 - [NDUB4_HUMAN]	44.17		25								10.83				9.17					8.33	33.33
Q8WX93-3	Isoform 3 of Palladin OS=Homo sapiens GN=PALLD - [PALLD_HUMAN]	44.16	2.3	4.6	3.1	4	7.09	4.5	1.1	1.2		4.4	4.5	1.1	4.1	4.7	2	3.5	2.2	3.7	4.2	4.1
B3KUU1	Target of Myb protein 1 OS=Homo sapiens GN=TOM1 PE=2 SV=1 - [B3KUU1_HUMAN]	44.15	7.92	6.42	6.42		16.6	10.19			4.91	11.7		4.15	7.92
Q9NYM9	BET1-like protein OS=Homo sapiens GN=BET1L PE=1 SV=1 - [BET1L_HUMAN]	44.14	18.92		13.51						11.71			18.92
Q92843-2	Isoform 3 of Bcl-2-like protein 2 OS=Homo sapiens GN=BCL2L2 - [B2CL2_HUMAN]	44.14	6.31	3	5.71	5.71	2.1		3		5.11		4.2	6.31	8.71			8.41	8.41		3.3
P51116	Fragile X mental retardation syndrome-related protein 2 OS=Homo sapiens GN=FXR2 PE=1 SV=2 - [FXR2_HUMAN]	44.13	7.13	2.67	11.89	2.82			4.46	1.49	1.34	7.88	5.35	4.61	1.19	4.16		4.75	2.97	4.75	11.74	5.2
Q05209	Tyrosine-protein phosphatase non-receptor type 12 OS=Homo sapiens GN=PTPN12 PE=1 SV=3 - [PTN12_HUMAN]	44.1	1.54	5	1.79	11.15	1.15	9.1	8.72	1.92				1.28	1.54	6.41	8.72	3.72	4.49
[truncated: 6,924 more rows]
