# Supplementary material for: An optimization of the LC-MS/MS workflow for deep proteome profiling on an Orbitrap Fusion
Source: Royal Society of Chemistry journal article supplement (doi:10.1039/c5ay01900a), 2015-12-02
Supplement: c5ay01900a10.xlsx [file c5ay01900a10.xlsx]

## Sheet: Table S7
Table S8 KEGG pathways analysis of the proteins identified across all the 10 fractions over a 60 min gradient.
Pathways	Number of identified proteins	Number of total proteins	% Identified proteins
Methane metabolism	6	6	100
Protein export	8	8	100
RNA degradation	55	57	96.4912
RNA polymerase	27	28	96.4286
Aminoacyl-tRNA biosynthesis	39	41	95.122
Ribosome	82	87	94.2529
DNA replication	32	36	88.8889
Nucleotide excision repair	39	44	88.6364
Valine, leucine and isoleucine degradation	39	44	88.6364
Fatty acid elongation in mitochondria	7	8	87.5
Amino sugar and nucleotide sugar metabolism	37	44	84.0909
Citrate cycle (TCA cycle)	26	31	83.871
Basal transcription factors	29	35	82.8571
Mismatch repair	19	23	82.6087
Valine, leucine and isoleucine biosynthesis	9	11	81.8182
One carbon pool by folate	13	16	81.25
Alanine, aspartate and glutamate metabolism	25	31	80.6452
Spliceosome	101	126	80.1587
Terpenoid backbone biosynthesis	12	15	80
Lysine degradation	35	44	79.5455
SNARE interactions in vesicular transport	30	38	78.9474
Proteasome	37	47	78.7234
Limonene and pinene degradation	11	14	78.5714
Pyrimidine metabolism	74	95	77.8947
Synthesis and degradation of ketone bodies	7	9	77.7778
Biosynthesis of unsaturated fatty acids	17	22	77.2727
Non-homologous end-joining	10	13	76.9231
Pentose phosphate pathway	19	25	76
Ubiquitin mediated proteolysis	103	137	75.1825
Lysine biosynthesis	3	4	75
Propanoate metabolism	24	32	75
Thiamine metabolism	6	8	75
Cysteine and methionine metabolism	25	34	73.5294
Fatty acid metabolism	29	40	72.5
Pyruvate metabolism	29	40	72.5
Chronic myeloid leukemia	53	75	70.6667
Fructose and mannose metabolism	24	34	70.5882
Selenoamino acid metabolism	18	26	69.2308
Base excision repair	24	35	68.5714
Pathogenic Escherichia coli infection	39	57	68.4211
Butanoate metabolism	23	34	67.6471
Adherens junction	52	77	67.5325
Fatty acid biosynthesis	4	6	66.6667
Glyoxylate and dicarboxylate metabolism	10	15	66.6667
Huntington's disease	120	180	66.6667
Lipoic acid metabolism	2	3	66.6667
Pantothenate and CoA biosynthesis	10	15	66.6667
Vitamin B6 metabolism	4	6	66.6667
Cell cycle	83	125	66.4
Arginine and proline metabolism	35	53	66.0377
Notch signaling pathway	31	47	65.9574
Galactose metabolism	17	26	65.3846
Pancreatic cancer	47	72	65.2778
N-Glycan biosynthesis	30	46	65.2174
Homologous recombination	18	28	64.2857
Renal cell carcinoma	45	70	64.2857
Vibrio cholerae infection	36	56	64.2857
Glutathione metabolism	32	50	64
Oxidative phosphorylation	83	130	63.8462
beta-Alanine metabolism	14	22	63.6364
Purine metabolism	97	153	63.3987
Glycolysis / Gluconeogenesis	38	60	63.3333
Parkinson's disease	81	128	63.2812
Non-small cell lung cancer	34	54	62.963
Other glycan degradation	10	16	62.5
Lysosome	73	117	62.3932
Epithelial cell signaling in Helicobacter pylori infection	42	68	61.7647
Neurotrophin signaling pathway	76	124	61.2903
Oocyte meiosis	67	110	60.9091
Alzheimer's disease	99	163	60.7362
Progesterone-mediated oocyte maturation	52	86	60.4651
ErbB signaling pathway	52	87	59.7701
Endometrial cancer	31	52	59.6154
Steroid biosynthesis	10	17	58.8235
Endocytosis	108	184	58.6957
Acute myeloid leukemia	34	58	58.6207
Amyotrophic lateral sclerosis (ALS)	31	53	58.4906
Sulfur metabolism	7	12	58.3333
Fc gamma R-mediated phagocytosis	55	95	57.8947
Insulin signaling pathway	78	135	57.7778
Cyanoamino acid metabolism	4	7	57.1429
Glioma	36	63	57.1429
Glycosaminoglycan degradation	12	21	57.1429
Ubiquinone and other terpenoid-quinone biosynthesis	4	7	57.1429
Apoptosis	49	87	56.3218
Riboflavin metabolism	9	16	56.25
Tight junction	74	134	55.2239
Glycine, serine and threonine metabolism	17	31	54.8387
Folate biosynthesis	6	11	54.5455
Porphyrin and chlorophyll metabolism	18	33	54.5455
Circadian rhythm	7	13	53.8462
mTOR signaling pathway	28	52	53.8462
Colorectal cancer	45	84	53.5714
B cell receptor signaling pathway	40	75	53.3333
Long-term potentiation	36	68	52.9412
Prostate cancer	47	89	52.809
Tryptophan metabolism	21	40	52.5
Small cell lung cancer	44	84	52.381
Adipocytokine signaling pathway	35	67	52.2388
Long-term depression	36	69	52.1739
Dorso-ventral axis formation	13	25	52
Inositol phosphate metabolism	28	54	51.8519
Thyroid cancer	15	29	51.7241
Gap junction	46	89	51.6854
Biotin metabolism	1	2	50
D-Glutamine and D-glutamate metabolism	2	4	50
Nicotinate and nicotinamide metabolism	12	24	50
T cell receptor signaling pathway	54	108	50
Regulation of actin cytoskeleton	106	215	49.3023
GnRH signaling pathway	48	98	48.9796
Glycerolipid metabolism	22	45	48.8889
Fc epsilon RI signaling pathway	38	78	48.7179
Prion diseases	17	35	48.5714
Bladder cancer	20	42	47.619
Glycerophospholipid metabolism	32	68	47.0588
p53 signaling pathway	32	68	47.0588
Focal adhesion	94	201	46.7662
VEGF signaling pathway	35	75	46.6667
Cardiac muscle contraction	36	78	46.1538
Phosphatidylinositol signaling system	34	74	45.9459
Wnt signaling pathway	69	151	45.6954
RIG-I-like receptor signaling pathway	32	71	45.0704
TGF-beta signaling pathway	39	87	44.8276
Aldosterone-regulated sodium reabsorption	18	41	43.9024
Nitrogen metabolism	10	23	43.4783
Pathways in cancer	142	328	43.2927
Starch and sucrose metabolism	18	42	42.8571
Chemokine signaling pathway	80	187	42.7807
Axon guidance	55	129	42.6357
PPAR signaling pathway	29	69	42.029
Cytosolic DNA-sensing pathway	23	55	41.8182
Histidine metabolism	12	29	41.3793
Phenylalanine metabolism	9	22	40.9091
Tyrosine metabolism	18	44	40.9091
MAPK signaling pathway	109	267	40.824
Leukocyte transendothelial migration	48	118	40.678
NOD-like receptor signaling pathway	25	62	40.3226
Vascular smooth muscle contraction	45	112	40.1786
Glycosylphosphatidylinositol(GPI)-anchor biosynthesis	10	25	40
Phenylalanine, tyrosine and tryptophan biosynthesis	2	5	40
Regulation of autophagy	14	35	40
Toll-like receptor signaling pathway	40	101	39.604
Dilated cardiomyopathy	36	92	39.1304
Pentose and glucuronate interconversions	7	18	38.8889
Melanogenesis	38	99	38.3838
Viral myocarditis	27	71	38.0282
Hypertrophic cardiomyopathy (HCM)	32	85	37.6471
Ether lipid metabolism	13	35	37.1429
Melanoma	26	71	36.6197
Chondroitin sulfate biosynthesis	8	22	36.3636
Sphingolipid metabolism	14	39	35.8974
Arrhythmogenic right ventricular cardiomyopathy (ARVC)	27	76	35.5263
Ascorbate and aldarate metabolism	6	17	35.2941
Heparan sulfate biosynthesis	9	26	34.6154
ECM-receptor interaction	29	84	34.5238
O-Mannosyl glycan biosynthesis	1	3	33.3333
Drug metabolism- other enzymes	14	43	32.5581
Type II diabetes mellitus	15	47	31.9149
ABC transporters	14	44	31.8182
Calcium signaling pathway	51	176	28.9773
Glycosphingolipid biosynthesis- globo series	4	14	28.5714
Keratan sulfate biosynthesis	4	14	28.5714
alpha-Linolenic acid metabolism	5	18	27.7778
Natural killer cell mediated cytotoxicity	36	133	27.0677
Androgen and estrogen metabolism	10	37	27.027
Antigen processing and presentation	22	83	26.506
Hedgehog signaling pathway	14	56	25
Metabolism of xenobiotics by cytochrome P450	15	60	25
Primary bile acid biosynthesis	4	16	25
Drug metabolism- cytochrome P450	15	62	24.1935
Renin-angiotensin system	4	17	23.5294
O-Glycan biosynthesis	7	30	23.3333
Arachidonic acid metabolism	13	56	23.2143
Systemic lupus erythematosus	22	99	22.2222
Cell adhesion molecules (CAMs)	29	132	21.9697
Glycosphingolipid biosynthesis- ganglio series	3	15	20
Jak-STAT signaling pathway	31	155	20
Taurine and hypotaurine metabolism	2	10	20
Complement and coagulation cascades	13	69	18.8406
Taste transduction	9	52	17.3077
Glycosphingolipid biosynthesis - lacto and neolacto series	4	25	16
Basal cell carcinoma	8	55	14.5455
Caffeine metabolism	1	7	14.2857
Primary immunodeficiency	5	35	14.2857
Steroid hormone biosynthesis	6	46	13.0435
Linoleic acid metabolism	3	28	10.7143
Type I diabetes mellitus	4	42	9.52381
Retinol metabolism	5	54	9.25926
Cytokine-cytokine receptor interaction	23	262	8.77863
Intestinal immune network for IgA production	4	49	8.16327
Maturity onset diabetes of the young	2	25	8
Hematopoietic cell lineage	6	86	6.97674
Allograft rejection	2	36	5.55556
Neuroactive ligand-receptor interaction	12	256	4.6875
Autoimmune thyroid disease	2	51	3.92157
Olfactory transduction	14	379	3.69393
Asthma	1	29	3.44828
Graft-versus-host disease	1	39	2.5641
