# Supplementary material for: An optimization of the LC-MS/MS workflow for deep proteome profiling on an Orbitrap Fusion
Source: Royal Society of Chemistry journal article supplement (doi:10.1039/c5ay01900a), 2015-12-02
Supplement: c5ay01900a11.xlsx [file c5ay01900a11.xlsx]

## Sheet: Table S8
Table S9 Phosphopeptides table with protein group accessions identified in mouse liver tissue.
Phosphopeptides	Protein Group Accessions	Modifications
MLGEDsDEEEEANTTEGK	O54716	S6(phospho)
IEDVGsDEEDDSGKDKK	P11499	S6(phospho)
KVEEEQEADEEDVsEEEAEDR	Q8VBT0	S14(phospho)
LADDEGDsDSESVGQSR	Q9Z277	S8(phospho)
HTGPNsPDTANDGFVR	J3QPH6	S6(phospho)
GLVAAYSGDsDNEEELVER	Q91YE7	S10(phospho)
LEGDSDDLLEDsDSEEHSR	S4R1L5	S12(phospho)
KGsLQDVDVAGFGNLGHSASFLAPR	D3Z069	S3(phospho)
MQAESQsPTNVDLEDKER	B9EKJ7	S7(phospho)
TEsGETLAGDSDFSLKPEK	Q62313	S3(phospho)
TALPTSGSsTGELELLAGEVPAR	Q80VP1	S9(phospho)
HGGGGIVANLsEQsLKDGVDR	Q3UM45	S11(phospho); S14(phospho)
LDGPTENIsEDEAQSSSQR	Q8BVS5	S9(phospho)
TSFDENDsEELEDKDSK	Q05D44	S8(phospho)
GNDsDGEAESDDPEK	P46467	S4(phospho)
GATPAEDDEDKDIDLFGsDEEEEDKEAAR	D3YUQ9;D3YZT9	S18(phospho)
SAsSDTSEELNSQDSPK	P70441	S3(phospho)
sFDNLTTTcENMVPLASR	M0QW74	S1(phospho); C9(Carbamidomethyl)
KVEEEQEADEEDVsEEEAEDREGASK	Q8VBT0	S14(phospho)
SQsPAASDcSSSSSSASLPSSGR	A6H663	S3(phospho); C9(Carbamidomethyl)
IYHLPDAEsDEDEDFKEQTR	E9Q3V6	S9(phospho)
ADGDWDDQEVLDYFsDKESAK	A0A087WQA0	S15(phospho)
LNSGGSSEDsFVEIR	Q8K3K8	S10(phospho)
FHDsEGDDTEETEDYR	A0A087WQA0	S4(phospho)
KVQVAPLQGsPPLSHDDR	Q9Z0U1	S10(phospho)
INsSGKEsPGSSEFFQEAVSHGK	Q8C929	S3(phospho); S8(phospho)
GSGTsPDEGDAQDSSESAR	Q8R0W0	S5(phospho)
ANsFVGTAQYVSPELLTEK	F2Z3Z9	S3(phospho)
IGHHsTSDDSSAYR	P50136	S5(phospho)
SQSSSLLDMGNMSAsDLDVADR	Q3U1G4	S15(phospho)
sLAADDEGGPDLEPDYSTATR	P98203	S1(phospho)
MESEAGADDsAEEGDLLDDDDNEDRGDDQLELK	Q9Z204	S10(phospho)
tSmGGTQQQFVEGVR	Q02248	T1(phospho); M3(Oxidation)
GGNVFEALIQDDsEEEEEEEENR	Q6P542	S13(phospho)
SPSDYSNFDPEFLNEKPQLsFSDK	F1DGF6	S20(phospho)
SHsLDDLQGDADVGK	F8VQK5	S3(phospho)
SKsSDTEQPSPTSGGGK	Q3THB0	S3(phospho)
SQsSDTEQPSPTSGGGK		S3(phospho)
SQEPISNDQKVsDDDKEK	Q80WJ7	S12(phospho)
SYsSPDITQALQEEEKR	Q58E42	S3(phospho)
AGLEDsEEDVEEAEVEAEDKDH	A2AQ07	S6(phospho)
SAsADNLILPR	Q8BGU5	S3(phospho)
TPEELDDsDFETEDFDVR	P26231	S8(phospho)
EVSPDsSEAEELSDcLHR	Q99LI2	S6(phospho); C15(Carbamidomethyl)
NLAKPGVTSTsDsEDEDDQEGEK	A2BI12	S11(phospho); S13(phospho)
tSMGGTQQQFVEGVR	Q02248	T1(phospho)
IEDVGsDEEDDSGK	P11499	S6(phospho)
NKLEGDsDVDSELEDR	Q9JMH9	S7(phospho)
sPGPGPGPGAGAGAEPGATGGSSHFISSR	E9Q166	S1(phospho)
NISLssEEEAEGLAGHPR	Q5U3K5	S5(phospho); S6(phospho)
EKPDsDDDLDIESFVTAK	Q8R4U7	S5(phospho)
sGTPPRPGsVTNMQADEcTATPQR	Q8BTI8	S1(phospho); S9(phospho); C18(Carbamidomethyl)
GGDTsDTESSIIIR	Q8BNW8	S5(phospho)
NEGsESAPEGQAQQR	P62960	S4(phospho)
SKPAAADsEGEEEEEDTAK	Q6P542	S8(phospho)
QGDNIsDDEDEVR	P70452	S6(phospho)
GILAADEsVGTMGNR	Q91Y97	S8(phospho)
ATsPSNNVDEVQIPEISLSK	D3Z5V3	S3(phospho)
SHsLPNSLDYAQASER	Q3UJU9	S3(phospho)
SQsQASLTGLAFMSPSNR	P59242;D3YUW7	S3(phospho)
EGEEPTVYsDDEEPKDETAR	Q3TFP8	S9(phospho)
RVsGSATPNSEAPR	Q6P9R1	S3(phospho)
AEAGAGsATEFQFR	P63325	S7(phospho)
GSAEGssDEEGKLVIDEPAK	E0CXA0	S6(phospho); S7(phospho)
VQGEAVSNIQENTQTPTVQEEsEEEEVDETGVEVK	Q60817	S22(phospho)
SQSSHsYDDSTLPLIDR	G3X9V2	S6(phospho)
DLGHPVEEEDEsGDQEDDDDEIDDGDKDQDI	Q9Z1Z0	S12(phospho)
AIGGIILTAsHNPGGPNGDFGIK	Q3U6X6	S10(phospho)
RPAASSAAAASAAASsPAGGGGEAQELLEHcGVcR	Q62318	S16(phospho); C31(Carbamidomethyl); C34(Carbamidomethyl)
tPPSTPPATANLSADDDFQNTDLR	E0CXZ5	T1(phospho)
TSsEDNLYLAVLR	Q05CR3	S3(phospho)
SVsENSLVAMDFSGEK	A2ASX3	S3(phospho)
AGGAsPAASSTTQPPAQHR	Q8R3Y8	S5(phospho)
aMGSGGAGsEQEDTVLFR	Q5PXT3	N-Term(Acetyl); S9(phospho)
HSLDsDEEDDDEEGSSK	Q3U4A3	S5(phospho)
RKPsVPDTASPADDSFVDPGER	A0A087WQD1	S4(phospho)
sSSLESLQTAVAEVR	Q5SV54	S1(phospho)
IDsDDDEEKEGDEEK	Q8C1D8	S3(phospho)
IQQFDDGGsDEEDIWEEK	G5E8R4	S9(phospho)
FEsEDDIDALAFGK	Q0PNF1	S3(phospho)
NVPQEESLEDsDVDADFK	O35344	S11(phospho)
AGAGMITQHSSTAsPVNR	Q8CH25	S14(phospho)
NISLSsEEEAEGLAGHPR	Q5U3K5	S6(phospho)
MLAEsDDsGDEESVSQTDK	Q3B7Z2	S5(phospho); S8(phospho)
AVPVsPSAVEEDEDEDGHTVVATAR	B9EHJ3;P39447	S5(phospho)
FDDsDTEQIAEEGDDNLAK	D3Z5N5	S4(phospho)
DKEVsDDEAEEKEEK	Q3TJU7	S5(phospho)
AVPIAVADEGEsESEDDDLKPR	Q8C6M1	S12(phospho)
YTDQsGEEEEDYESEEQLQHR	F6SFF5	S5(phospho)
AAsLNYLNQPNAAPLQVSR	Q9DBS5	S3(phospho)
SDEEDEDsDFGEEQR	Q61586	S8(phospho)
sVTGQTVLITGAGHGIGR	A8Y5N4	S1(phospho)
LFDDEAsVDEPR	Q3UGL9	S7(phospho)
sAEDLTDGSYDDILNAEQLK	D3Z5T2	S1(phospho)
YVDEDNsDGETVDHR	V9GXJ9	S7(phospho)
AETSESSGSAPAVPEASAsPK	D3Z7U4	S19(phospho)
TASGSsVTSLEGTR	B7ZWC0	S6(phospho)
REsVVNLENFK	Q8VDF3	S3(phospho)
QKSDAEEDGVtGSQDEEDSKPK	P35564	T11(phospho)
LGASNsPGQPNSVK	Q8BU35	S6(phospho)
aAAAAAAAAAGDSDsWDADTFSMEDPVR	Q3UGC7	N-Term(Acetyl); S15(phospho)
YAFMPLIDDsDDEVEEFMVTSENLTEGIK	Z4YML9	S10(phospho)
RKPGAGGsPALAR	A2AJI1	S8(phospho)
EEAKPAsPSSVQDR	Q8BI84	S7(phospho)
AESSDsGAEsEEEEAQEELKGAEQSGSDDKK	Q5XG73	S6(phospho); S10(phospho)
vDYSVWDHIEVsDDEDETHPNIDTASLFR	Q61081	N-Term(Acetyl); S12(phospho)
EDNsEGEEILEEVGGDPEEEDDHHMEFcR	Q3U582	S4(phospho); C28(Carbamidomethyl)
DVTNLTVGGFTPMsPR	O55201	S14(phospho)
GSGTAsDDEFENLR	Q7TMY8	S6(phospho)
LVDSDGsLAEVPK	D3YTP0	S7(phospho)
IDsTEVIYQPR	Q9WTK7	S3(phospho)
DHNsEDEDEDKYADDIDMPGQNFDSK	Z4YM25	S4(phospho)
PGPTPSGTNVGsSGR	Q9CQS8	S12(phospho)
GDDDEEsDEEAVKK	Q3UT19	S7(phospho)
IVSNASctTNcLAPLAK	S4R257	C7(Carbamidomethyl); T8(phospho); C11(Carbamidomethyl)
SAssDTSEELNSQDSPK	P70441	S3(phospho); S4(phospho)
STsQGSINSPVYSR	Q3UP03	S3(phospho)
GHLSRPEAQSLsPYTTSANR	Q3UDZ8	S12(phospho)
IEDVGsDEEDDSGKDK	P11499	S6(phospho)
VGGsSVDLHR	G3X9V2	S4(phospho)
AEAENNSGVESSGYGsPGPTWDR	Q3UR42	S16(phospho)
VAEPEEsEAEEPAAEGR	Q9D1T2	S7(phospho)
EEAsDDDMEGDEAVVR	Q8BYH6	S4(phospho)
ADAPDAGAQsDSELPSYHQNDVSLDR	Q6DFZ1;Q6A099	S10(phospho)
FIDKDQQPsGSEGEDDDAEAALKK	Q99J36	S9(phospho)
IsPQSNVDFDLTLR	G5E8X1	S2(phospho)
LNHVAAGLVsPSLK	E9Q6E5	S10(phospho)
VRPASSAASVYAGAGGsGSR	P05784	S17(phospho)
ALDVSAsDEEMARPK	Q8R146	S7(phospho)
GSDAVsETSSVSHIEDLEK	Q99K01	S6(phospho)
ISEMGGKDsAETLVLQSQK	Q8BUM4	S9(phospho)
QGsFSEDVISHK	F6Q750	S3(phospho)
TVMDGGLEsDGPNMTENGLEDESRPQR	Q6P5B5	S9(phospho)
SVPTVDsGNEDDDSSFK	Q05D44	S7(phospho)
sAEDLTDGSYDDILNAEQLKK	D3Z5T2	S1(phospho)
ATsPVANGGVLAAVSK	Q9D1R2	S3(phospho)
TPEELDDsDFEtEDFDVR	P26231	S8(phospho); T12(phospho)
NLtSSSLNDISDKPEK	O88343	T3(phospho)
HSTPSNSSNPSGPPsPNSPHR	B2RQQ7	S15(phospho)
VDPSLMEDsDDGPSLPTK	Q9CQU3	S9(phospho)
tSVQtEDDQLIAGQSAR	P26231	T1(phospho); T5(phospho)
GsLNEQIALVLIR	Q5XG73	S2(phospho)
ETTsDPSRTPEEEPLNLEGLVAHR	A0A087WQS0	S4(phospho)
SQtEEDcTEELFDFLHAR	Q8BMU6	T3(phospho); C7(Carbamidomethyl)
TNsGISSASGGSTEPTTPDSERPAQALLR	A2ACC7	S3(phospho)
VKAsPITNDGEDEFVPSDGLDKDEYAFSSGK	Q64511	S4(phospho)
KVELsESEEDKGSK	A2A8V8	S5(phospho)
GHPSAGAEEEGGsDGsAAEAEPR	Q8JZQ9	S13(phospho); S16(phospho)
SYsAGNASQLELLAR	E9Q944	S3(phospho)
RQVsASELcTSGILDR	Q8R0W0	S4(phospho); C9(Carbamidomethyl)
THQVSAAPTsSAGDGFK	P32020	S10(phospho)
KGSPVSEIGWETPPPEsPR	Q99L88	S17(phospho)
DDDDIDLFGsDDEEESEEAK	A0A087WS46	S10(phospho)
GATPAEDDEDKDIDLFGsDEEEEDK	D3YUQ9;D3YZT9	S18(phospho)
TPLGAsLDEQSSGTPK	A2AQD6	S6(phospho)
KKEPAISSQNsPEAR	P10711	S11(phospho)
GLVAAYSGEsDSEEEQER	Q99KG3	S10(phospho)
LDsPEVNIIPEQDEcMAHPR	P30415	S3(phospho); C15(Carbamidomethyl)
HSLPsGLGLSETQITSHGFDSTK	A2RSX9	S5(phospho)
SLGsSADLELLLR	Q6P3B0	S4(phospho)
SDsGGSSSEPFER	Q5DTJ4	S3(phospho)
VLTDAVDDItSIDDFLAVSENHILEDVNK	P26231	T10(phospho)
TDPDHYETDYTTGGEscEELEEDWVR	E0CZ73	S16(phospho); C17(Carbamidomethyl)
DDsGAEDNVDTHQQQAENSTVPTADSR	Q8BVR6	S3(phospho)
YNLDAsEEEDSNK	E9PUD0	S6(phospho)
HGGGGIVANLsEQSLK	Q3UM45	S11(phospho)
DHsPTPSVFNSDEER	Q9D824	S3(phospho)
LEGDsDVDSELEDR	Q9JMH9	S5(phospho)
ESDDKPEIEDVGsDEEEEEKK	Q3TJU7	S13(phospho)
VPSsDEEVVEEPQSR	B9EKJ7	S4(phospho)
sGDALTTVVVK	Q8BIZ6	S1(phospho)
EASGGPQLSSsASFSR	Q3U926	S11(phospho)
sHNGPVIVGSPQGGVDIEEVAASSPELIFK	C6EQH3	S1(phospho)
SFsVEREPQENNSNYPDEPWR	Q3UHE9	S3(phospho)
LLKPGEEPSEYtDEEDTK	Q80UU9	T12(phospho)
RNsLTGEEGELVK	Q9JI99	S3(phospho)
SHsGPAGSFNKPAIR	Q3TJN8	S3(phospho)
EHQEQEPELGGAHAANVASVPIATYGPVsPTVSFQPLPR	Q8VCF0	S29(phospho)
EELAsDLEEmATSSAK	A2APD7	S5(phospho); M10(Oxidation)
WLDEsDAEMELR	Q8K2C9	S5(phospho)
SAAsPVVISIPER	H9KV01	S4(phospho)
VLsPTAAKPSPFEGK	Q3ULI5	S3(phospho)
AQDATAGVLWNEEDtDEDEDDDGVSPESHPR	Q922K7	T15(phospho)
RPSPDDDLtDEDNDDmQLQAQR	Q3TUU1	T9(phospho); M16(Oxidation)
KEESEEsDDDmGFGLFD	P99027	S7(phospho); M11(Oxidation)
LMELHGEGGsSGK	P97351	S10(phospho)
GVQAGNsDTEGGQPGR	Q9JIX8	S7(phospho)
APsVANIGSHcDLSLK	Q6KAM8	S3(phospho); C11(Carbamidomethyl)
HIVSNDSSDsDDEAQGPK	Q9DBX5	S10(phospho)
sGSGmSVISSSSVDQR	E9Q3I8	S1(phospho); M5(Oxidation)
SSIQEDGVSEVsDKDEDSLASTR	Q3UFY8	S12(phospho)
ASHsAVDITK	Q8BUV3	S4(phospho)
EKDAESVEcPDADsLNIPDVDEEGFSIKPEANQNDTK	Q3UQN2	C9(Carbamidomethyl); S14(phospho)
METVSNASSSSNPSsPGR	Q4VA53	S15(phospho)
KEEsEESEDDMGFGLFD	P47955	S4(phospho)
AsPALGSGHHDGSGDSLEMSSLDR	Q3TSX8	S2(phospho)
sGDETPGSEAPGDK	Q00PI9	S1(phospho)
HNQDSQHcSLsGDEEDELFK	Q6P9Q6	C8(Carbamidomethyl); S11(phospho)
DDDDIDLFGsDDEEESEEAKK	A0A087WS46	S10(phospho)
SASsGAEGDVSSEREP	Q9DD18	S4(phospho)
AEIDSHsFGEK	O55003	S7(phospho)
TPsSEEISPTK	Q3UUP9	S3(phospho)
GVsPSQAQGLGSNLVTEVR	P22361	S3(phospho)
sSPPPLSGASEVDAGELGSER	A6X919	S1(phospho)
ADSsEELGAAAETLETQSGSFLDSPVGNQFPTLIR	A0A068WAQ5	S4(phospho)
TAsLTSAASIDGSR	Q9QYG0	S3(phospho)
DSDQVAQsDGEESPAAEEQLLGER	Q3UPL0	S8(phospho)
KtSDPDVILcNSVELIR	Q7TPE5	T2(phospho); C10(Carbamidomethyl)
ATsPSSSVSGDFDDGHHSVPTPGPSR	D3YYG4	S3(phospho)
EQKPFTPAsPVQSTPSKPSDK	Q921U7	S9(phospho)
sMSDVSAEDVQNLR	F6TFN2	S1(phospho)
GSPVSEIGWEtPPPESPR	Q99L88	T11(phospho)
GTGDcsDEEVDGK	Q3UFT0	C5(Carbamidomethyl); S6(phospho)
RLsEEAcPGVLSVAPTVTQPPGREEQR	O08715	S3(phospho); C7(Carbamidomethyl)
AGPLGGssYEEEEEEEGGGGGER	Q9JKF6	S7(phospho); S8(phospho)
KTSFDENDsEELEDKDSK	Q05D44	S9(phospho)
DHEEVLEIPDRDsEEELENIIGQIAYR	Q3TA19	S13(phospho)
SKPAAADsEGEEEEEDTAKEK	Q6P542	S8(phospho)
EVIEASDKEGLsPAK	Q61136	S12(phospho)
ESDDKPEIEDVGsDEEEEEKKDGDK	Q3TJU7	S13(phospho)
sLLQSALDFLAGPGsLGGAAGR	Q3UIZ0	N-Term(Acetyl); S15(phospho)
EEsSEDENEVSNILR	B2RRE7	S3(phospho)
KFsEEPEVAANFTK	A2APD7	S3(phospho)
mDDsTNSLVGGR	Q8C7E7	M1(Oxidation); S4(phospho)
NHEELKVDEEtQEVLGNLR	Q61112	T11(phospho)
SKsPPPPEEEAKDEEEDQTLVNLDTYTSDLHFQISK	Q00PI9	S3(phospho)
SNsSEASSGDFLDLK	P97825	S3(phospho)
KDsLDLDVEAASSPAAAALEEDDSSGR	Q3UJU9	S3(phospho)
GENKPVLFGFGsGTGLSFADLASSNSGDFAFGSK	Q9ERU9	S12(phospho)
RTsMGGTQQQFVEGVR	Q02248	S3(phospho)
AEsPETSAVESTQSTPQK	Q4VA53	S3(phospho)
KGSAEGssDEEGKLVIDEPAK	E0CXA0	S7(phospho); S8(phospho)
GAANLQLIQALsDsEEEHDSAWDGR	D3YVR5	S12(phospho); S14(phospho)
ETNVSKEDTDQEEKAsNEDVTK	A2BI12	S16(phospho)
GsPSGGSTAETSDTASIR	A2A7S8	S2(phospho)
AGSVsPGSPPYLQPR	Q8CGB6	S5(phospho)
FAVLNDsDKsDDEASScNDQLK	Q8R5F7	S7(phospho); S10(phospho); C17(Carbamidomethyl)
GLVAAYSGEsDsEEEQER	Q99KG3	S10(phospho); S12(phospho)
GPLDGSPyAQVQR	Q8CGB6	Y8(phospho)
NSGSFSSPSIsPR	Q5HZI1	S11(phospho)
RSsDPALTGLSTSVSDNNFSSEEPSR	E0CZE2	S3(phospho)
LLSEQDGsLKDILR	P28230	S8(phospho)
HAFSPVAsVEsASGETLHSPK	P29699	S8(phospho); S11(phospho)
FHLEPTsPPTTDGFK	Q8VCB3	S7(phospho)
HAFSPVAsVESASGETLHSPK	P29699	S8(phospho)
sYEDLTELEDR	Q6PDG8	S1(phospho)
IAsDEEIQGTK	Q8C306	S3(phospho)
LMELLNETsPSSQETHDSPFcLR	B2ZRS8	S9(phospho); C21(Carbamidomethyl)
VNssGEsGGESDEFLQSR	Q05D44	S3(phospho); S4(phospho); S7(phospho)
TGSsSPPGGLSKPGSQLDSMLGSLQSDLNK	F8VQ28	S4(phospho)
TVPAAVPGIcFLsGGMSEEDATLNLNAINR	Q91Y97	C10(Carbamidomethyl); S13(phospho)
LATssPEQSWPSTFK	F7BTZ2	S4(phospho); S5(phospho)
SEsSGNLPSVADTR	O08715	S3(phospho)
FIIGSVSEDNsEDEISNLVK	Q5SWU9	S11(phospho)
AGsISTLDSLDFAR	A0A087WRM8	S3(phospho)
LGPGLPQDGsDEEDEEWPTLEK	O54825	S10(phospho)
MDDsTNSLVGGR	Q8C7E7	S4(phospho)
DAsPSSSSAVASSK	B9EKE4	S3(phospho)
AMGAAQVVVTDLsASR	Q64442	S13(phospho)
APDRtPPSEEDSAEAER	Q3TN35	T5(phospho)
SsEDLAGPLPSSVPSSTTSSKPK	Q69ZM3	S2(phospho)
SSSPSsPAAVNHHSSSDISPVSNESTSSSPGK	Q9QX52	S6(phospho)
AtSPPHLDGTSNPESTVPEK	F7BTZ2	T2(phospho)
VVDYSQFQEsDDADEDYGR	Q80XU3	S10(phospho)
sSPPVEHPAGTSTTDNDVIIR	Q9EP71	S1(phospho)
SQsLPTTLLSPVR	A2AQD6	S3(phospho)
KDsLDLDVEAASSPAAAALEEDDSSGREDVQLVLLQADELHQGSK	Q3UJU9	S3(phospho)
RVsTDLPEGQDVYTAAcNSVIHR	E9PZP8	S3(phospho); C17(Carbamidomethyl)
DSGTMGsDSDESVIQTK	Q8R5F7	S7(phospho)
cGSGPVHISGQHLVAVEEDAEsEDEDEEDVK	Q8BSZ3	C1(Carbamidomethyl); S22(phospho)
AAETPAVAScWSGPQVsPEHK	Q8BTI8	C10(Carbamidomethyl); S17(phospho)
RGsLELGNPSAAHLGDELK	E3VVQ8	S3(phospho)
asGVQVADEVcR	Q9R0P5	N-Term(Acetyl); S2(phospho); C11(Carbamidomethyl)
TARPNSEAPLsGSEDADDSNK	Q05D44	S11(phospho)
NcEsDTEENIAR	Q8VDF3	C2(Carbamidomethyl); S4(phospho)
THsTSSSIGSGESPFSR	Q9QYF9	S3(phospho)
TsHAAPAATSGFVGAVGHK	P51660	S2(phospho)
NGILAIEGTGSDVDDDMsGDEKQDNESNVDPR	Q4FE56	S18(phospho)
EQMMNSSVSSGsGSLR	H7BWY4	S12(phospho)
PGPTPSGTNVGSSGRsPSK	Q9CQS8	S16(phospho)
AAVLSDsEDDAGNASAK	Q8C1D8	S7(phospho)
AEsPTPGLTQGTEPGAGQEGAmFVHTR	Q6PDG8	S3(phospho); M22(Oxidation)
EsLKEEDESDDDNm	E0CX62	S2(phospho); M14(Oxidation)
RFEsEDDIDALAFGK	Q0PNF1	S4(phospho)
ENSPSVsPTANITAPFGLKPR	Q3TSE7	S7(phospho)
DGSEQTDEEAEGPFsDDEMVTHK	Q99KK1	S15(phospho)
IEDsEPHIPLIDDTDAEDDAPTK	G5E829	S4(phospho)
IYASSsPPDTGQR	Q3U4D5	S6(phospho)
sSGTNFQGLPSK	E9QAJ9	S1(phospho)
KVsVEPQDSHQDAQPR	Q4VA99	S3(phospho)
DWDKEsEGEEPAGGR	Q9CYX7	S6(phospho)
RAPsVANIGSHcDLSLK	Q6KAM8	S4(phospho); C12(Carbamidomethyl)
GVsQEKDGQISSAIVSSVQSK	Q6PDI4	S3(phospho)
LAsGSSELAVGESPR	F8WI30	S3(phospho)
ALFKPPEDSQDDEsDsDAEEEQTTK	Q5SVF8	S14(phospho); S16(phospho)
sSSAPNVHINTIEPVNIDDLIR	F6SZ47	S1(phospho)
LLDLVVHPVPQPSQcLEFIQQsPTR	Q8CJF7	C15(Carbamidomethyl); S22(phospho)
KSsVEGLEPAENK	A2AUM6	S3(phospho)
sLDGAAAAESTDR	A0A068WAQ5	S1(phospho)
tSVQTEDDQLIAGQSAR	P26231	T1(phospho)
NLGsINTELQDVQR	E9Q6R3	S4(phospho)
aASAAATAAASAATAASAASGsPGSGEGSAGGEK	Q62318	N-Term(Acetyl); S22(phospho)
VQIsPDSGGLPER	Q3U0V1	S4(phospho)
VSSAPIPcPSPSPAPSAVPsPPK	A6H663	C8(Carbamidomethyl); S20(phospho)
EELAsDLEEMATSSAK	A2APD7	S5(phospho)
GSLAsLDSLR	G3X9V2	S5(phospho)
EEGsEQAPVMSEDELVSIIDGVLR	Q99KV4	S4(phospho)
ESDDKPEIEDVGsDEEEEEK	Q3TJU7	S13(phospho)
SQSELDDQHDYDSVAsDEDTDQEPLPSAGATR	Q5F258	S16(phospho)
sSScESLGAQLPAAR	B8JJF6	S1(phospho); C4(Carbamidomethyl)
VSGAGLsPSR	B9EKJ7	S7(phospho)
GPPPSsPGDHTLLANSTELK	Q3UGS6	S6(phospho)
QGsPTPALPEK	A0A087WQS0	S3(phospho)
QLsESESSLEMDDER	D3YZP9	S3(phospho)
HGsDPAFGPSPR	Q148V8	S3(phospho)
GTFAsLSELHcDK	A8DUK4	S5(phospho); C11(Carbamidomethyl)
VmHTQcHSTPDsAEDVR	P29699	M2(Oxidation); C6(Carbamidomethyl); S12(phospho)
QAsPTEVVER	E9PW51	S3(phospho)
SLAsFEAQGSGMSSEK	A2AQD6	S4(phospho)
sPWSMDENLMHISYEAGILENPK	P16460	S1(phospho)
GAPQLsPESPLLSGAR	A2BFA9	S6(phospho)
VDNSsLTGESEPQTR	Q3TXF9	S5(phospho)
DRsSPPPGYIPDELHQIAR	G5E8L8	S3(phospho)
AKPAMPQDSVPsPR	Q3TS02	S12(phospho)
EGINPGYDDYADsDEDQHDAYLER	A2AW05	S13(phospho)
VLASAASTAsKGEDLSSQHEPLK	Q4VA99	S10(phospho)
VISLsGEHSIIGR	P08228	S5(phospho)
HIKEEPLsEEEPcTSTAVPSPEK	Q6DFW4	S8(phospho); C13(Carbamidomethyl)
DLLSDLQDIsDSER	A2A9P6	S10(phospho)
NSTPsEPDSGQGPPAEEEEGEEEAAKEEAEAQGVR	E0CXA0	S5(phospho)
AAQAsLNALNDPIAVEQALQEK	O08614	S5(phospho)
LGEEsKEPLSDEDEEDNDDVEPISEFR	Q923F1	S5(phospho)
mAVPISVsNPDLLR	E9Q4Z2	M1(Oxidation); S8(phospho)
RRDsDGVDGFEAEGK	B2RUG7	S4(phospho)
SSSMssIDLVSASDDVHR	Q9EQG9	S5(phospho); S6(phospho)
RGFsDSGGGPPAK	O35691	S4(phospho)
STSTPNVHMVSTtAPMDSSLMQFTAQSFSTDAAGR	P04627	T13(phospho)
aETLSGLGDASAAGAAAVSSAAsETGTR	D3YXK2	N-Term(Acetyl); S23(phospho)
DWEDDsDEDmSNFDR	Q3TJG6	S6(phospho); M10(Oxidation)
EFEEDsDEKEEEGDDDEEEVVYER	Q8BGC0	S6(phospho)
SVsASHEGDVK	Q3U9G9	S3(phospho)
SNDTSQtPPGETVPR	Q921U7	T7(phospho)
GMKDDKDEEDDGTGsPHLNNR	Q3U172	S15(phospho)
NSTLsEEDYIER	O55003	S5(phospho)
LsLPTTcSGSSLSAAIHR	Q571B2	S2(phospho); C7(Carbamidomethyl)
DFAGAVFPPESAPGKPGcAEAEsAGTAAATESHGAPGAK	Q9CYS6	C18(Carbamidomethyl); S23(phospho)
EEsEEEEEDDEDDDEEDEEEEKEK	E9Q8Y1	S3(phospho)
EGsLPAAADLHTHPIR	G3X9R9	S3(phospho)
AQsTDSLGTSSSLQSK	J3QJV7	S3(phospho)
SPsESAEETHTLEEK	Q9CT10	S3(phospho)
VVcDADDsDSDVVSDK	Q8C1D8	C3(Carbamidomethyl); S8(phospho)
VsPEVGSADVASIAQK	Q6PGL7	S2(phospho)
GGSSEELHDsPR	Q3UMU9	S10(phospho)
VsDDDKEKGEGALPTGK	Q80WJ7	S2(phospho)
SFSLASSGNsPISQR	Q8CI95	S10(phospho)
KAEGEPQEEsPLK	A0A087WQA0	S10(phospho)
VMHTQcHSTPDsAEDVRK	P29699	C6(Carbamidomethyl); S12(phospho)
KVsLVLEQMQPLGALAGQAELTR	D3YUW7	S3(phospho)
FALGLSGGsLVSMLAR	Q8C6M6	S9(phospho)
KLsSSESPAPDTGSSAASGEADTSRPGTQQK	E9Q0J5	S3(phospho)
LPsPLAHSSLDSSALLQALK	Q52L58	S3(phospho)
IDsFSVQSLDSR	D6RJK7	S3(phospho)
DGsFEGLTVK	Q3TNI8	S3(phospho)
sLGGAVGSASGGR	Q71FD5	S1(phospho)
VTKPNLTKPPsPVTcVSDPYR	E9PUA2	S11(phospho); C15(Carbamidomethyl)
SQsPsPPPLPEDLEK	Q9JIX8	S3(phospho); S5(phospho)
DLTHSDsESSLHMSDR	P70302	S7(phospho)
sLSPGKENINSQEVEK	O35691	S1(phospho)
sASPDDDLGSSNWEAADLGNEER	D6RI64	S1(phospho)
IADGNEITTGTMVSsIDSEKQDSPPPKPPR	P35831	S15(phospho)
TFGGAPGFSLGsPLSSPVFPR	P31001	S12(phospho)
GEAGQELLAEDSTDGQSLGHSNTGPGNQDsLRR	Q8BYU6	S30(phospho)
VEGsPTEEAGLPTELQGEGLSVAASEGR	E9Q3Y4	S4(phospho)
sATDADMVNSGWLVVGK	Q6DFZ1;Q6A099	S1(phospho)
sVENLPEcGITHEQR	Q8BKC8	S1(phospho); C8(Carbamidomethyl)
LLKEGEEPTVYsDDEEPKDETAR	Q3TFP8	S12(phospho)
sSPNVANQPPsPGGK	E9PYX7	S1(phospho); S11(phospho)
sVVGTPAYLAPEVLR	D3Z6I0	S1(phospho)
RGsLTFAGESSK	Q148V8	S3(phospho)
QVsASELcTSGILDR	Q8R0W0	S3(phospho); C8(Carbamidomethyl)
cSsLSSLSQEVSR	A2AIX1	C1(Carbamidomethyl); S3(phospho)
AQDsVGRSDNEMcELDPGQFIDR	P48437	S4(phospho); C13(Carbamidomethyl)
IVEPEVVGESDsEVEGDAWR	Q9CQU1	S12(phospho)
RVsMILQSPAFcEELESMIQEQFK	Q8K232	S3(phospho); C12(Carbamidomethyl)
REEQTDTsDGESVTHHIR	P36916	S8(phospho)
sGEGEVSGLLR	Q62318	S1(phospho)
LPsGSGPASPTTGSAVDIR	E9Q616	S3(phospho)
HLsHPEPEQQHVIQR	Q9JIX8	S3(phospho)
TAsAGTVSDAEAR	F2Z3U3	S3(phospho)
KATLPSAPVPGPGLETAGPADAPSGAVSGGGsPR	Q3USN7	S32(phospho)
TVGTNTPPsPGFGR	A0A087WQS0	S9(phospho)
GHTQTWPDTSsPEVMQTQVESPLLQSK	Q8BTI8	S11(phospho)
LATSsPEQSWPSTFK	F7BTZ2	S5(phospho)
VEGTEIVKPsPK	P97868	S10(phospho)
ENPPsPPTSPAAPQPR	E3WH30	S5(phospho)
KKDEGsDIDDEDMEELLNDTR	E9Q9T6	S6(phospho)
LKELFDYsPPLHK	A0A087WQA0	S8(phospho)
NLNLVSsTASIK	Q3TSU7	S7(phospho)
DGsASGTTLLEALDcILPPTRPTDKPLR	D3YZ68	S3(phospho); C15(Carbamidomethyl)
KSPsADSIHTR	Q8CDA1	S4(phospho)
KVITAFNDGLNHLDsLK	A8DUK4	S15(phospho)
MLPHAPGVQMQAIPEDAVHEDsGDEDGEDPDKR	Q3UXH8	S22(phospho)
WAHDKFsGEEGEIEDDESGTENREEK	Q569Z6	S7(phospho)
TVGNVsPTAQMVQR	Q3U5M9	S6(phospho)
TEDGGWEWsDDEFDEESEEGR	F7AVI9	S9(phospho)
sVEDDEEGHLIcQSGDVLSAR	V9GZR3	S1(phospho); C12(Carbamidomethyl)
SLPASGTPQsPPAVK	F2Z3U3	S10(phospho)
YHGHsMSDPGVSYR	P35486	S5(phospho)
MIsQScLSNIEK	Q8BGL3	S3(phospho); C6(Carbamidomethyl)
sPADSLSSAAGASELSAEGAGK	E9Q1P8	S1(phospho)
TsPTPSVFVELGEEELEAVTARPEAVER	P59017	S2(phospho)
QLSVPAsDEEDEVPAPIPR	Q6P542	S7(phospho)
EKEIsDDEAEEEK	P11499	S5(phospho)
EMsSLSSEGEVQNR	Q59DK8	S3(phospho)
ATAPQTQHVsPMR	D3YUQ9;D3YZT9	S10(phospho)
MYsPSPSDGPASQQPLPNHPR	A2AIX1	S3(phospho)
TAFYNEDDsEEEQR	F8VQ93	S9(phospho)
DAQsPLLEVDAASVK	Q69ZR9	S4(phospho)
sQNNFVAILDLPEGEHQYK	Q3U5I9	S1(phospho)
ASVSDLsPR	Q569Z6	S7(phospho)
IYSFNsANDSGGSANLDK	Q3TRV5	S6(phospho)
LKsVEDEMDSPGEEPFYTGQGR	B1AUB9	S3(phospho)
tTSPATDAGHVQETSEPSLQALESR	Q8R010	T1(phospho)
DMsPLPESEVTLGK	P27546	S3(phospho)
RAsVcAEAYNPDEEEDDAESR	P31324	S3(phospho); C5(Carbamidomethyl)
AEAKEEsEEsDEDmGFGLFD	E9Q070	S7(phospho); S10(phospho); M14(Oxidation)
EDAPPEDKEsESEAKLDGETASDSESR	Q6PBC0	S10(phospho)
VADALANAAGHLDDLPGALsALSDLHAHK	Q91VB8	S20(phospho)
EAGIVHsDAEKEQEEEEQKQEMEVK	O35691	S7(phospho)
AEEQLPPLLSPPsPSTPHSR	F6RND9	S13(phospho)
REDKEDEDDEDDDVsHVDEEDVLGVQR	Q9QX52	S15(phospho)
KVELsEsEEDKGSK	A2A8V8	S5(phospho); S7(phospho)
NGPLNEsQEEEEDGEQGSNLNR	B2RY27	S7(phospho)
EYPDQsPVLQR	F7D1J2	S6(phospho)
NQPEPTAPAtPMTSLLR	Q8VC78	T10(phospho)
HRHsPTGPPGFPR	Q99KG3	S4(phospho)
tQSAPLPQNAQALQHLVIQQQHQQFLEK	Q6NZM9	T1(phospho)
KGsSSEVFSDAAR	Q6DFV3	S3(phospho)
SSGsPYGGGYGSGGGSGGYGSR	E9Q7H5	S4(phospho)
TPsQEGcQDLTQEQR	Q5BL07	S3(phospho); C7(Carbamidomethyl)
LPsSSLLVDR	Q8C7E7	S3(phospho)
GPAGSPcEEGDDVEEDGTSDLRDEASSVtR	Q0P678	C7(Carbamidomethyl); T29(phospho)
TAPSsPLTSPSDTR	B1ATR2	S5(phospho)
SmsHQAAIASQR	Q8C0E2	M2(Oxidation); S3(phospho)
SLSKSDsDLLTcSPTEDATMGSR	P59672	S7(phospho); C12(Carbamidomethyl)
GsPKPAAVEAVTAAGSQHIQTLTDEVTK	F6W0G8	S2(phospho)
VKEVHDELEDLPsPPPPLsPPPTTSPHK	Q8BUV3	S13(phospho); S19(phospho)
NTTKPETIPDMEDsPPVsDSEEQQESVR	Q8C9B9	S14(phospho); S18(phospho)
DKDDQEWESTsPPKPTVFISGVIAR	A0A087WR57	S11(phospho)
EVHDELEDLPsPPPPLSPPPTTSPHK	Q8BUV3	S11(phospho)
EsDSAEGDETESPEQLVR	A2ALU3	S2(phospho)
RLsLTPDPEKGEPPALDPESQGGEAQPPEcK	Q6P9Q6	S3(phospho); C30(Carbamidomethyl)
SDsNQYIR	Q3UWI2	S3(phospho)
QtSDSSVGVNHVSSTTSLGEDYEDDDLVNSDEVMK	Q9D873	T2(phospho)
NASPYGsLNNIADGLSSLTEHFSDLTLTSEAR	B2RVL6	S7(phospho)
KDsPISPHFTR	E9Q3Y4	S3(phospho)
GmSHsPSVALR	P48437	M2(Oxidation); S5(phospho)
NRPGYVsEEEEDDEDYEmAVK	Q9ERU9	S7(phospho); M18(Oxidation)
ITVEKDPDSALGIsDGETSPSSK	B1AZ15	S14(phospho)
GLNSDsVTEETLR	Q8C196	S6(phospho)
NYQQNYQNSEsGEKNEGSESAPEGQAQQR	P62960	S11(phospho)
YHGHsMSDPGVsYR	P35486	S5(phospho); S12(phospho)
SYGSQPNsPTSEDLAK	D3Z3H4	S8(phospho)
TcsFGGFDLTNR	F8VQK5	C2(Carbamidomethyl); S3(phospho)
sMEETRPVPTVK	E9Q5W5	S1(phospho)
GAANLQLIQALsDSEEEHDSAWDGR	D3YVR5	S12(phospho)
AQsYPDNHQEFTDYDNPIFEK	G5E8L8	S3(phospho)
SATVsPQQPQAQQR	D3Z5J3;E9Q6A3	S5(phospho)
RPDAPAASLsPPAAEPGHSGHR	Q8BIZ6	S10(phospho)
RRsESSGNLPSVADTR	O08715	S3(phospho)
mEDIDQSSLVSSSADsPPRPPPAFK	Q8BHF5	N-Term(Acetyl); S16(phospho)
TIGDsPPVLLGGPVYTR	Q91VS8	S5(phospho)
WDsYENFNQHHEDSVDGALAHTR	Q8CGB6	S3(phospho)
SAsPGLPK	A2BE92	S3(phospho)
IKPVTENLVLPSHTGFcQSsGDEALSK	Q61687	C17(Carbamidomethyl); S20(phospho)
EPAISSQNsPEAR	P10711	S9(phospho)
QSAsFGSPVHSEALAPESVSHQR	B2KF50	S4(phospho)
DmsPSAETEAPLAK	P27546	M2(Oxidation); S3(phospho)
HQAsISELKR	B6ZHD0	S4(phospho)
STsVDDTDKSSSEAIMVR	B1AZ15	S3(phospho)
sIEDDEEGHLIcQSGDVLR	B0QZP9	S1(phospho); C12(Carbamidomethyl)
SGLsLEELR	Q60575	S4(phospho)
GQGAsPVAMQK	Q64727	S5(phospho)
LPsVEEAEVSKPSPPASKDEDEDFQAILR	P57016	S3(phospho)
DVEDmELsDVEDDGSK	Q6NXI6	M5(Oxidation); S8(phospho)
VHQSVATEGPSPsPSPSLSSTQSAVSK	Q9DC70	S13(phospho)
HAFSPVAsVEsAsGETLHSPK	P29699	S8(phospho); S11(phospho); S13(phospho)
sPPHHSGFQQYQQADASK	Q3UKQ9	S1(phospho)
SEsPEPGYVVTSSGLLLPVLLPR	Q920R0	S3(phospho)
ADsHGELDLAR	O55137	S3(phospho)
LFDDsDEKEDEEDTDGKK	Q8BGC0	S5(phospho)
GSASsALELTEEELATAEAVR	Q8CIF2	S5(phospho)
DVEDMELsDVEDDGSK	Q6NXI6	S8(phospho)
KVsLVLEQmQPLGALAGQAELTR	D3YUW7	S3(phospho); M9(Oxidation)
IGsDPLAYEPK	Q99KF4	S3(phospho)
TGEPDEEEGtFR	Q9Z239	T10(phospho)
GTPSQsPVVGR	A0A087WRL1	S6(phospho)
sLLTAGATHHVR	Q8BK55	S1(phospho)
KGTGDcsDEEVDGKADGADAK	Q3UFT0	C6(Carbamidomethyl); S7(phospho)
GTFSDQELDAQsLDDEDDSLQHAVHPALNR	Q8CI08	S12(phospho)
HTFGQKPSLsTEDSQEENTSK	O35601	S10(phospho)
sPPATGSAYGSSQK	Q569Z6	S1(phospho)
sDSRSESPEPGyVVTSSGLLLPVLLPR	Q920R0	S1(phospho); Y12(phospho)
AQsAsVESIPEVLEEcTSPADHSDSASVHDMDYVNPR	Q6DFZ1;Q6A099	S3(phospho); S5(phospho); C16(Carbamidomethyl)
SGMsPEQSK	Q8BTI8	S4(phospho)
GPsPSPVGSPASVAQSR	A2BH40	S3(phospho)
RTsPSEGAMANDESAEVMGDGESAHDSPR	F7ADQ2	S3(phospho)
AFGESSTEsDEDEEEGcSHK	A5A4Z2	S9(phospho); C17(Carbamidomethyl)
IFVGGLsPDTPEEK	Q60668	S7(phospho)
IAcEEEFsDsDEEGEGGRK	D3YYI8	C3(Carbamidomethyl); S8(phospho); S10(phospho)
KVVDYSQFQEsDDADEDYGR	Q80XU3	S11(phospho)
NKsTSSAMGGSHQDLSVIQPIVK	Q68EF0	S3(phospho)
sIQDLTVTGTEPGQVSSR	A2AP93	S1(phospho)
KSPVGKsPPATGSAYGSSQK	Q569Z6	S7(phospho)
GAILSEEELAAMsPTAAAVAK	Q7M739	S13(phospho)
GHYEVTGsDDEAGK	E9Q616	S8(phospho)
AIEPQKEEADENYNsVNTR	P70452	S15(phospho)
GStTGLPHQGPLPQEDSEERPcVEK	Q99K99	T3(phospho); C22(Carbamidomethyl)
GMSHsPSVALR	P48437	S5(phospho)
DGTAPPPQSPSSPGSGQDEDWsDEESPR	Q99JB8	S22(phospho)
AAKEsEEEEEEEETEEK	Q3UBB6	S5(phospho)
TAsEGsEAETPEAPK	I3PQW3	S3(phospho); S6(phospho)
sDGGVKEPQTTVVHNATDGIK	Q6ZWS7	S1(phospho)
GtSPRPPEGGLGYSQLGDDDLK	A2A9P6	T2(phospho)
GHPSAGAEEEGGSDGsAAEAEPR	Q8JZQ9	S16(phospho)
DHSSQsEEEVVEGEKEVEALK	Q91Z78	S6(phospho)
AFLsPPTLLEGPLR	Q3TZZ3	S4(phospho)
ASGsENEGDYNPGR	Q64511	S4(phospho)
VGSSSSsFR	P11679	S7(phospho)
KAESSSDSSDSDsSEDEAPAKPVSTTK	Q3UBB6	S13(phospho)
EGVILTNENAAsPEQPGDEDAK	H3BKN0	S12(phospho)
IALESVGQPEEQMESGNcsGGDDDWTHLSSK	Q64337	C18(Carbamidomethyl); S19(phospho)
SVVTEEFNGsDWER	Q9CXS4	S10(phospho)
ESPRPPAAAEAPAGsDGEDGGRR	Q6ZQ58	S15(phospho)
QSQsQDVLVLEDSK	Q8VI47	S4(phospho)
APVVLQPEQIVSEEEtPPPLLTK	Q9JIX8	T16(phospho)
SKsMSDVSAEDVQNLR	F6TFN2	S3(phospho)
VEPAWHDQDETSSVKsDGAGGAR	Q6ZQ58	S16(phospho)
AsPALGSGHHDGsGDSLEMSSLDR	Q3TSX8	S2(phospho); S13(phospho)
RPLTTSPsLEGTQETYTVAHEENVR	Q9CQB2	S8(phospho)
sAGTATQMR	Q3U9H3	S1(phospho)
KLsVGAYVSSVR	A0AUN0	S3(phospho)
MFSNPDNGsPAMTHR	O88343	S9(phospho)
HsLGQEVIGIGGSQDESEVPVR	B9EKJ7	S2(phospho)
ESLKEEDEsDDDNM	E0CX62	S9(phospho)
DLFELDsSEGEDSTDFFER	Q8BHX6	S7(phospho)
VLASAASTAsKGEDLSSQHEPLKK	Q4VA99	S10(phospho)
SYsPDGKEsPSDK	Q3TTX0	S3(phospho); S9(phospho)
KDsEGYSESPDLEFEYADTDK	Q3UGC1	S3(phospho)
RQESGsSLEPPSGLALEDGAHVLR	F8VQF9	S6(phospho)
SVPDSIGRsPESEGVGAGDEEKDAATK	Q9JJB4	S9(phospho)
RQPsPQPSPR	Q8BTI8	S4(phospho)
HGTDLWIDSMNSAPSHsPEK	Q99K28	S17(phospho)
GMHMHQVGGsPPASSTSScSLTNDVAK	F7CN67	S10(phospho); C19(Carbamidomethyl)
AAPGGAsPTIFSR	Q9D0S9	S7(phospho)
sGTPPRPGSVTNmQADEcTATPQR	Q8BTI8	S1(phospho); M13(Oxidation); C18(Carbamidomethyl)
HVTSNAsDSESSYR	H7BWY4	S7(phospho)
TGTGSPFAGNsPAR	Q6PAI8	S11(phospho)
QDGPLPKPHsVSLNDTETR	Q9WV55	S10(phospho)
GDmsDEDDENEFFDAPEIITMPENLGHK	Q3B7Z2	M3(Oxidation); S4(phospho)
sLDMDGIIAEVR	P11679	S1(phospho)
TASGssVTSLEGTR	B7ZWC0	S5(phospho); S6(phospho)
YQDEVFGGFVTEPQEEsEEEVEEPEER	Q3UR88	S17(phospho)
FHDtSSPLMATQSSAETHWAVR	Q60902	T4(phospho)
VTETEDDsDSDSDDDEDDVHVTIGDIK	Q9D824	S8(phospho)
LPEEPSsEDEQQPEKK	E9Q3I8	S7(phospho)
KEEsEESDDDMGFGLFD	P99027	S4(phospho)
YGPSSVEDTTGsGAADAK	A0A087WS46	S12(phospho)
ELsPEQSTAGKPSDGSSALDR	Q3TK27	S3(phospho)
SPsPPPDGSPAATPEIR	Q6P1B9	S3(phospho)
KTSFDQDsDVDIFPSDFTSEPPALPR	Q64511	S8(phospho)
HSQsPDSGKESLLK	P59242;D3YUW7	S4(phospho)
YGPSSVEDTTGSGAADAKDDDDIDLFGsDDEEESEEAKK	A0A087WS46	S28(phospho)
AsGEmASAQYITAALR	E9PYI8	S2(phospho); M5(Oxidation)
NSASATTPLSGNSsR	E9QN52	S14(phospho)
SKsQLSHLSHEPPLAIGDHK	J3QNY6	S3(phospho)
FQEQEcPPsPEPTR	Q9CTF6	C6(Carbamidomethyl); S9(phospho)
VEEEQEADEEDVsEEEAEDREGASK	Q8VBT0	S13(phospho)
tPESFLGPNAALVDLDSLVSRPGPTPPGSK	Q80VP1	T1(phospho)
RDsSEGPPGSEGDGGGQSKPSSGGGVDK	A0AUN3	S3(phospho)
sSQEEGIGNNEVILR	Q8BUM4	S1(phospho)
SFsmHDLTAIQGDEPVGHRPYQTLPEAK	Q99KK1	S3(phospho); M4(Oxidation)
LANHDEGsDDEEEETPKK	E9PX94	S8(phospho)
KDsISEDEMVLR	Q8JZZ2	S3(phospho)
HREDsDVEMVENASGK	Q9CTA7	S5(phospho)
AEEDEILNRsPR	P35564	S10(phospho)
sLEGGGcPVR	Q6P9Q4	S1(phospho); C7(Carbamidomethyl)
sVDEVNYWDK	P50136	S1(phospho)
LGQSVsLNPPVR	A3KGR6	S6(phospho)
TVIIEQSWGsPK	P63038	S10(phospho)
VQVAPLQGsPPLSHDDR	Q9Z0U1	S9(phospho)
GHSsVGAPETEAFLQPER	Q9R1S7	S4(phospho)
RLsENNcSLDDWEIGAGHLSSSAFNSEK	Q8BT15	S3(phospho); C7(Carbamidomethyl)
sGSQPAcLDHVQDR	Q9QZK2	S1(phospho); C7(Carbamidomethyl)
VAsGSDLHLTDIDSDSNR	Q9JMH9	S3(phospho)
KQsQQLELLESELR	Q9QZC2	S3(phospho)
EVsPAPATQGESR	A6H619	S3(phospho)
QsVESDIHGLR	P05784	S2(phospho)
RKsEPAVGPLR	D3Z080;Q3UTJ2	S3(phospho)
AVPIAVADEGEsEsEDDDLKPR	Q8C6M1	S12(phospho); S14(phospho)
KEEsEEsEDDMGFGLFD	P47955	S4(phospho); S7(phospho)
NLAKPGVTSTSDsEDEDDQEGEK	A2BI12	S13(phospho)
YGcPGsPSQELSHPLHSPGLPAPSR	F6RND9	C3(Carbamidomethyl); S6(phospho)
SSTPAAGcAtPTEK	E9Q310	C8(Carbamidomethyl); T10(phospho)
RWsAEVTSNTYSDEDRPPK	Q3TJN8	S3(phospho)
NAIHTYTQAGsHMAAK	P24270	S11(phospho)
GsGVNAAGDGTIR	Q9JLF6	S2(phospho)
FFHHAEEEEEEEDEsPPER	E9Q9J4	S15(phospho)
DRLsDSTAGADSLLDISSEADQQDLLVLLQAK	Q9EP71	S4(phospho)
KAAsPsPQSVR	A2A8V8	S4(phospho); S6(phospho)
AHSSPAsLQLGAVSPGTLTASGVVSGPAAAPAAQHLR	P46938	S7(phospho)
ESGSEQDLDGAGERAsDLEEEENATR	Q0P678	S16(phospho)
HGLTHEELKsPR	Q569Z6	S10(phospho)
FLESAAADVsDEDEDEDTDGR	F6Z700	S10(phospho)
NSGPVSEVNTGFsPEVK	Q8BTI8	S13(phospho)
EEAsDDDmEGDEAVVR	Q8BYH6	S4(phospho); M8(Oxidation)
KAEVDGSLsDSHVSPPAK	E9Q166	S9(phospho)
HSsYPAGTEEDEGMEEELSPFR	Q3U9H3	S3(phospho)
IFDEIMGcFcDsPPQSPTFPESGHTSLYDEDKVPR	Q5SWU9	C8(Carbamidomethyl); C10(Carbamidomethyl); S12(phospho)
SSPNVANQPPsPGGK	E9PYX7	S11(phospho)
ESAQAVAVALsPK	H9KV01	S11(phospho)
SDsPGKDFGPTLGLK	Q5SV54	S3(phospho)
SSsVGSSSSYPISSAGPR	E9Q3W4	S3(phospho)
TWtLcGTPEYLAPEIILSK	P05132	T3(phospho); C5(Carbamidomethyl)
AGDVLEDsPKRPK	E0CXA0	S8(phospho)
SPDEATAADQEsEDDLSASR	F8VPU2	S12(phospho)
AAsDPLLSSVSPAVSK	A2AEW0	S3(phospho)
sGSGMSVISSSSVDQR	E9Q3I8	S1(phospho)
SLsPGGAALGYR	Q66JP8	S3(phospho)
LDPAQSAsRENLLEEQGSIALR	A3KGU5	S8(phospho)
HLsSTSDDEPLSSVNHAAK	D3Z491	S3(phospho)
VSEsEGKLEGLATAVTPNK	Q8CI95	S4(phospho)
AGsSPTQGAQNEAPR	Q80U46	S3(phospho)
sPTMEQAVQTASAHLPAPAPVGR	Q8K2F8	S1(phospho)
ALmGsPQLVAAVVR	Q02257	M3(Oxidation); S5(phospho)
KPPAPPsPVQSQSPSTNWSPAVPAK	A2A8V8	S7(phospho)
FIDKDQQPsGsEGEDDDAEAALKK	Q99J36	S9(phospho); S11(phospho)
VLQKPSVFGSDsDDDETSVSESLQR	Q8BQY7	S12(phospho)
VDLsPYPTISHINK	Q9WVL0	S4(phospho)
EVDPSTGELQSLQMPESEGPSsLDPSQEGPTGLK	Q64337	S22(phospho)
DEQSIGLKDsLLAHSSDPVEMR	F6Y3V0	S10(phospho)
RLVDSDGsLAEVPK	D3YTP0	S8(phospho)
LAsSHGSHmAPAGPcHGDPcEK	Q3UN81	S3(phospho); M9(Oxidation); C15(Carbamidomethyl); C20(Carbamidomethyl)
VSALAGPSsDDENEEESKPEKEDEPQEDAK	Q3U5E1	S9(phospho)
KPLSVsPSTDGLR	D3Z080	S6(phospho)
YPsGSEIPVVEDEEK	E3VVQ8	S3(phospho)
NLsLVTDcMEHALTSTHPR	Q9R092	S3(phospho); C8(Carbamidomethyl)
DKtPVQSQQPSATTPSGADEK	Q3TI61	T3(phospho)
SmsADEDLQEPSR	G3UY39	M2(Oxidation); S3(phospho)
RIsIVEScFGAAGQPLTIPGR	Q91WB4	S3(phospho); C8(Carbamidomethyl)
QLsTEQAALQESLEK	Q5HZI1	S3(phospho)
NYQQNYQNsESGEK	P62960	S9(phospho)
NQPLPDSIHDVGNDWKEsR	Q96LX3	S18(phospho)
sPPYTAFLGNLPYDVTEDSIKDFFR	Q3THB0	S1(phospho)
ScsVPLPSNHGEVDELR	A2AJ88	C2(Carbamidomethyl); S3(phospho)
SSPDSPENtPPPTPTAPSSGSQHSGR	Q8BU36	T9(phospho)
AEIDSHSFGEKNstLSEEDYIER	O55003	S13(phospho); T14(phospho)
KEEsEEsDDDmGFGLFD	P99027	S4(phospho); S7(phospho); M11(Oxidation)
AAVLsDsEDDAGNASAK	Q8C1D8	S5(phospho); S7(phospho)
FHDsSSPLLTSGPSVAELPWAVK	F6W2Q5	S4(phospho)
GKsLKDEDVLQK	Q9CY27	S3(phospho)
sPGSGSQSSGWHEVEPGLPSPSTLK	B1AUB9	S1(phospho)
QLsSGVSEIR	D3YZ06	S3(phospho)
sQsLPTTLLSPVR	A2AQD6	S1(phospho); S3(phospho)
tSPAGGTWSSVVSGVPR	F6U2C2	T1(phospho)
GGVTGsPEASISGSK	E9Q616	S6(phospho)
sRELHDVDLAEVKPLVEK	B7ZWC0	N-Term(Acetyl); S1(phospho)
AEssDsGAEsEEEEAQEELKGAEQSGSDDKK	Q5XG73	S3(phospho); S4(phospho); S6(phospho); S10(phospho)
VIHDNFGIVEGLMTTVHAITAtQK	S4R257	T22(phospho)
EVsPSSNLEEIFNWK	Q5F2F2	S3(phospho)
SEPVKEEGsELEQPFAQATSSVGPDR	D3YXK2	S9(phospho)
SSHYGGsLPNVNQIGcGLAEFQSPLHSPLDSSR	Q3U182	S7(phospho); C16(Carbamidomethyl)
LQLsDEESVFEDALVcPDAR	D3Z069	S4(phospho); C16(Carbamidomethyl)
FHHNSLEVLSTVSPLGSGPPsPDVTGcKDPLEDVSADVTQK	G3X9X5	S21(phospho); C27(Carbamidomethyl)
APTAALsPEPQDSK	D3YXK2	S7(phospho)
KANSTQEPSQQPASSGASPLSASEGPEsPGSSRPSVAGLR	D9J2Z9	S28(phospho)
sATDADmVNSGWLVVGK	Q6DFZ1;Q6A099	S1(phospho); M7(Oxidation)
QAStDAGTAGALTPQHVR	P46938	T4(phospho)
KPDGVKEsTESSNTTIEDEDVK	Q8C8X9	S8(phospho)
sPPKVPIVIQDDSLPTGPPPQIR	A2AA85	S1(phospho)
LSGsRQELSPSHSLGSNK	Q6A029	S4(phospho)
LATTVsAPDLK	P27546	S6(phospho)
GPPsPPAPVMHSPsR	Q3TM37	S4(phospho); S14(phospho)
QGsGVILR	Q8JZR2	S3(phospho)
EDEIsPPPPNPVVK	A2AI69	S5(phospho)
YMAENPTAGVVQEEEEDNLEYDsDGNPIAPSKK	Q810A7	S23(phospho)
RPsTSPDVLQGQPPR	F6SPK0	S3(phospho)
NTVDIVDKPENsPQR	B2RQG2	S12(phospho)
FLSHsTDSLNK	E9Q394	S5(phospho)
KSSSFSEEKGEsDDEKPR	Q9JIX8	S12(phospho)
AAVQELSGsILTSEDPEER	Q3TDW2	S9(phospho)
RtSAETADVATSELLVNQASTNPVPGDGLHR	Q9D2E2	T2(phospho)
VLSTsTDLEAAVADALK	A0A087WS18	S5(phospho)
HTsFPSLSQDKPSPER	D3YZ89	S3(phospho)
QEAGTGPAsPGQAPESVK	Q9EPW2	S9(phospho)
TPSPKEEDEEAEsPPEKK	Q80XU3	S13(phospho)
sPGHmVILNQTK	Q8CH25	S1(phospho); M5(Oxidation)
SLsSDcILSPDAR	Q9D279	S3(phospho); C6(Carbamidomethyl)
GsGNHLLELSNSMVDSQESR	Q8BWS5	S2(phospho)
NQDVFQTLsESR	Q14CH1	S9(phospho)
VPssDEEVVEEPQSR	B9EKJ7	S3(phospho); S4(phospho)
VNQSALEAVTPsPSFQQR	Q8K3H0	S12(phospho)
WLDEsDAEmELR	Q8K2C9	S5(phospho); M9(Oxidation)
sGEDEQQEQTIAEDLVVTK	D3YVH7	N-Term(Acetyl); S1(phospho)
TSsVVTLEVAK	E9PYX7	S3(phospho)
LDGETAsDSESR	Q6PBC0	S7(phospho)
ETNVSKEDtDQEEKAsNEDVTK	A2BI12	T9(phospho); S16(phospho)
aSSPDPPsPLLVR	I6L9G8	N-Term(Acetyl); S8(phospho)
EKEIsDDEAEEEKGEK	P11499	S5(phospho)
LSNAsPNPNEGVK	Q3TSL9	S5(phospho)
GILAADEsTGSIAK	D3Z510	S8(phospho)
REESPMDVDQPsPSAQDTQSIVISDGTPQGEK	Q7TMY8	S12(phospho)
ARPAQAPVSEELPPsPKPGK	Q6PGL7	S15(phospho)
NREPPPPGsPPAsPGPQSPSTK	Q3UYI5	S9(phospho); S13(phospho)
YFDSFGDLSSAsAIMGNAK	A8DUK4	S12(phospho)
sPGTGAGLAEK	P28230	S1(phospho)
EFEsGDFQDFTR	V9GXD9	S4(phospho)
QIcLVMLETLSQsPQGR	P60335	C3(Carbamidomethyl); S13(phospho)
PSVALKsPR	P32020	S7(phospho)
KREEAAPPtPAPDDLAQLK	Q80WJ7	T9(phospho)
ALENGEADEPsFSDPEDFVDDVsEEELLGDVLK	Q8JZQ9	S11(phospho); S23(phospho)
KEEsEEsEDDmGFGLFD	P47955	S4(phospho); S7(phospho); M11(Oxidation)
TRsPDVISSASTALSQDIPEIASEALSR	F6ZJ27	S3(phospho)
sIQEFSLTAPLVAESAR	P56400	S1(phospho)
LcDFGSASHVADNDITPyLVSR	Q61136	C2(Carbamidomethyl); Y18(phospho)
NsDSNLLSLDGLDNEVK	E9PY51	S2(phospho)
VLTDsGSLDSTIPGIENIITVTTEQLTTASFPVGSK	Q80WJ7	S5(phospho)
GGHsDEEEDEGVPASYHTVSLQVSQDLLDLMHTLHTR	Q6DFZ1	S4(phospho)
AGPLGGSsYEEEEEEEGGGGGER	Q9JKF6	S8(phospho)
TAsLTSAAsIDGSR	Q9QYG0	S3(phospho); S9(phospho)
tHSDASDDEAFTTSK	B9EKC3	T1(phospho)
TAsAPNLAETEKETAEHLNLAGTSR	Q3U417	S3(phospho)
AESSDSGAEsEEEEAQEELKGAEQSGSDDKK	Q5XG73	S10(phospho)
GTLDEEDEEADsDTDDIDHR	Q8VCE2	S12(phospho)
QADVADQQTTELPAENGETENQSPAsEEEK	D3Z607	S26(phospho)
LVLPMDDsEPALNSLDDTR	B0QZV3	S8(phospho)
AAsPPASASDLIEQQQK	Q3UGC1	S3(phospho)
LGTGGGGsPDKSPSAQELK	Q3TYJ0	S8(phospho)
EATAQKPTASSGSTVTtPPPLVR	Q8CHY6	T17(phospho)
DGsGENLAASQER	B2KF50	S3(phospho)
VDNARVsPEVGSADVASIAQK	Q6PGL7	S7(phospho)
KDPSGPGNPSAEsPLHR	P35582	S13(phospho)
SSsPVTELTAR	Q8BTI8	S3(phospho)
HSASDPGPAPVVNSSsR	Q8BI84	S16(phospho)
LGLDFPNLPYLIDGsHK	A2AE89	S15(phospho)
ASsFSGISILTR	E9Q9D6	S3(phospho)
TEEDRENTQIDDTEPLsPVSNSK	A2AU91	S17(phospho)
KEtEsEAEDDNLDDLER	A2A8V8	T3(phospho); S5(phospho)
ILGSAsPEEEQEKPILDRPTR	A2AA85	S6(phospho)
TLsDESIYSSQR	Q4VBF8	S3(phospho)
HALQSASAGSGsFTDVR	B7ZNJ1	S12(phospho)
IADPEHDHTGFLTEyVATR	D3Z6D8	Y15(phospho)
AAVVAsPLLDQQR	E9Q784	S6(phospho)
VSALEEDMDDVEsSEEEEEEDEKLER	Q4FK66	S13(phospho)
SEAAAPHAAGGGLssDEEEGTSSQAEAAR	P51612	S14(phospho); S15(phospho)
ALEEGDGSVSGsSPR	Q6ZQ03	S12(phospho)
SMLQtPPDQNLSGSK	Q8BTI8	T5(phospho)
SSsSLLASPSHIAAK	Q3TZZ7	S3(phospho)
LsSDLTR	P97868	S2(phospho)
KGsITEYTATEEK	Q91VL0	S3(phospho)
LSHPGQLMSQPSSAcDsLPESDKK	Q05DR8	C15(Carbamidomethyl); S17(phospho)
KPPAPPsPVQSQsPSTNWSPAVPAK	A2A8V8	S7(phospho); S13(phospho)
GDMsDEDDENEFFDAPEIITMPENLGHK	Q3B7Z2	S4(phospho)
SFsMQDLR	Q8K072	S3(phospho)
MADTGsPGMQR	Q60575	S6(phospho)
sGDEMIFDPTMSK	Q99L45	N-Term(Acetyl); S1(phospho)
DsSQEYTDSTGIDLHEFLVNTLK	E9Q9D6	S2(phospho)
KSsFSNSADDIK	Q61686	S3(phospho)
HSGPEGEATVDNDsEEEDGDcGLIPTVEEIPDDAASLTMR	Q8VI47	S14(phospho); C21(Carbamidomethyl)
ASsLEDLVLK	Q3TE28	S3(phospho)
TEtPPPLASLNVSK	Q9D0R8	T3(phospho)
HTQLVEQLDESsV	Q9WUH7	S12(phospho)
SStSVVSEVSPSSETDNR	Q3UZV1	T3(phospho)
HNDIVDsDsDTEDR	Q8C539	S7(phospho); S9(phospho)
SAsSDTSEELNSQDSPKR	P70441	S3(phospho)
LIPITGGNAGsPEDQHGK	Q69ZR9	S11(phospho)
NsLESISSIDR	Q80U72	S2(phospho)
LNsNNALIEFLLEGTPEIR	Q8CI04	S3(phospho)
ELILSSEPSPAVTPVtPTTLIAPR	Q3U5L3	T16(phospho)
AALLAQYADVtDEEDEADKKDDAGASTANVSSDR	Q9CR29	T11(phospho)
SPsKVEVTEK	Q6PHC0	S3(phospho)
DIDHETVVEEQIIGENsPPDYSEYMTGK	Q3TLF0	S17(phospho)
aESSAATQSPSVSSSSSGAEPSALGGGGGsPGAcPALGAK	Q9ES97	N-Term(Acetyl); S30(phospho); C34(Carbamidomethyl)
DADVSEEsPPPLPER	P35831	S8(phospho)
IHDLEDDLEMSSDASDAsGEEGSR	Q3THK3	S18(phospho)
SKsEEAHAEDSVMDHHFR	Q9CY58;Q3UEI6	S3(phospho)
EDGGLEDNEKNFYEsEEEEEEKEK	Q3TQ33	S15(phospho)
ALPDKsPPSSAEQSTPAPPTK	P57016	S6(phospho)
KHsLEGDEGSDFITK	Q3TS51	S3(phospho)
TDsDSDLQLYK	Q9DBT5	S3(phospho)
sFIAILDNLLTENR	P11714	S1(phospho)
TSALLFsSDEEDQWNIADSHTK	Q6PGL7	S7(phospho)
DDKDEEDDGTGsPHLNNR	Q3U172	S12(phospho)
EGLsPAKR	Q61136	S4(phospho)
NsLKEANHDGDFGITLTELR	G5E829	S2(phospho)
GVAPADsPDAPR	Q6ZPS6	S7(phospho)
RAsLQTTEEPGR	Q9D159	S3(phospho)
ASPITNDGEDEFVPsDGLDKDEYAFSSGK	Q64511	S15(phospho)
HsLAsTDEKR	Q91ZX7	S2(phospho); S5(phospho)
GADNDGsGSEsGYTTPK	Q5F2E7	S7(phospho); S11(phospho)
SSSFSEEKGEsDDEKPR	Q9JIX8	S11(phospho)
QGTAIGsEEEEAAGESGPR	Q3TFK5	S7(phospho)
KQsESVEEHVEQVK	B0V2P5	S3(phospho)
ALHGAQtSDEER	F8WHU8	T7(phospho)
AsPSSDEDKPEVPPR	Q3TJN8	S2(phospho)
HSSLPTEsDEDIAPAQR	O54774	S8(phospho)
sLLDASEEAIKK	Q64727	S1(phospho)
sLGPENSETELER	Q8K2Q9	S1(phospho)
RLsEEAcPGVLSVAPTVTQPPGR	O08715	S3(phospho); C7(Carbamidomethyl)
SQsFPDVEPQLPQAPTR	A0A087WQS0	S3(phospho)
ENPPVEDssDEDDKRNPGNLYDK	Q3TDQ1	S8(phospho); S9(phospho)
KIsGTTALQEALK	D3Z3M7	S3(phospho)
NsTPsEPDSGQGPPAEEEEGEEEAAKEEAEAQGVR	E0CXA0	S2(phospho); S5(phospho)
AQRLsQETEALGR	Q02819	S5(phospho)
sGSIIGSR	Q3THA6	S1(phospho)
EtATDSESLNDMEVAYPSLSQVQETVSTMSLWR	Q8K441	T2(phospho)
AAEEAFVNDIDEsSPGTEWER	B1AWE0	S13(phospho)
LKsKEsLQEAGK	Q8BPS5	S3(phospho); S6(phospho)
TIsDGTISAAK	E9PUK3	S3(phospho)
ENPPVEDssDEDDKR	Q3TDQ1	S8(phospho); S9(phospho)
RAPAAQPPAAAAPSAVGsPAAAPR	Q9D1L0	S18(phospho)
IGDLQAAIEDEMEsDENEDLINSLQDMVTK	Q9JMH9	S14(phospho)
AKsELVLAPAPAPAATHSPLHR	Q3U912	S3(phospho)
GsLAsLDSLR	G3X9V2	S2(phospho); S5(phospho)
EEDEEAEsPPEKK	Q80XU3	S8(phospho)
MLPHAPGVQMQAIPEDAIPEEsGDEDEEDPDKR	D3YYI8	S22(phospho)
KNsASLHVLK	Q9JJL3	S3(phospho)
TGsEPTLSPALVR	Q9QZK2	S3(phospho)
TQSSscEDLPSTTQPK	A0A067XG53	S5(phospho); C6(Carbamidomethyl)
SsPPATDPGPVPSSPSQEPPTKR	Q922Y1	S2(phospho)
VDEEtQEVLGNLR	Q61112	T5(phospho)
RTHsDASDDEAFTTSK	B9EKC3	S4(phospho)
NSQEDSEDsEEKDVK	Q80XU3	S9(phospho)
VKsWVEENR	Q78JT3	S3(phospho)
ESEKsLENETLNK	Q3THB0	S5(phospho)
SVsDNTLVAMDFSGHAGR	Q571B2	S3(phospho)
ALENGEADEPSFsDPEDFVDDVSEEELLGDVLK	Q8JZQ9	S13(phospho)
ASVGQsPVLPSTTFK	Q6NXI6	S6(phospho)
SPGtPAGEGSGSPPK	Q8K232	T4(phospho)
YQLQsQENFEPFMK	P12710	S5(phospho)
SSTGSPTsPINAEK	Q6PDN3	S8(phospho)
ENPPVEDsSDEDDKR	Q3TDQ1	S8(phospho)
sHGQDYLVGNR	K9JA27	S1(phospho)
DKYEPAAVsEHGDKK	Q3TXF9	S9(phospho)
THsDQFLVSFK	A2AKV2	S3(phospho)
SDGsLDDGDGIHR	Q8C5F9	S4(phospho)
TLMLPLTEGsLR	Q8BK03	S10(phospho)
WDEQTSNTKGDDDEEsDEEAVKK	Q3UT19	S16(phospho)
KTARPNSEAPLsGSEDADDSNK	Q05D44	S12(phospho)
KAstSLTDDEVEDEEETIEEEEAHEGLVDHHTELTNLAK	Q8CHI8	S3(phospho); T4(phospho)
QsSLTFQSSDPEHVR	B1AZ15	S2(phospho)
LGYIsVTDVLK	G3UY11	S5(phospho)
GGssGEELEDEEPVK	Q3UMU9	S3(phospho); S4(phospho)
GDSIEEILADsEDEDEEEER	Q6P5B0	S11(phospho)
sMGYDDLDYGMMSDYGTAR	G3X9V2	S1(phospho)
RLsNLPTVDPIAVcHELYNTIR	D3YYG4	S3(phospho); C14(Carbamidomethyl)
GDNQsPIELHTK	P16015	S5(phospho)
LSQSSQDsSPVR	Q3TD41	S8(phospho)
LEcELESEDPDKGGNEsDDLANGETGGDR	Q8BI84	C3(Carbamidomethyl); S17(phospho)
EEVLLPLDNPyGK	P25688	Y11(phospho)
KEEsEEsDDDMGFGLFD	P99027	S4(phospho); S7(phospho)
sPsPAPPPPPPPPPPR	A2A8V8	S1(phospho); S3(phospho)
LEDDTsGSFFK	A2AIX1	S6(phospho)
KKsPNELVDDLFK	Q3KQQ1	S3(phospho)
SHsPLPAPPSK	Q8BKL0	S3(phospho)
tPPKDLPAIPGVTSPTSDEPPMQASQSQLPSSPEDKR	Q3TII9	T1(phospho)
SNAVsPTRNEENGAPEKPVEKPHEKPETR	Q3UT02	S5(phospho)
AAsQQEIEQSIETLNMLMLDLEPASAAAPLHK	A0A087WQS0	S3(phospho)
RPsVTQGTGLSTQPEcGPK	Q69ZF3	S3(phospho); C16(Carbamidomethyl)
DSRPLsPVLHLVK	Q80ZX0	S6(phospho)
RKDsSEDEFSAGSFLPSGEYQGGQQcLR	D3Z4C0	S4(phospho); C26(Carbamidomethyl)
HHAsISELKK	A0A068WAQ5;Q3UH12	S4(phospho)
LTLsDGESGEEKPTKPK	Q61687	S4(phospho)
TSsLTHSEEK	Q9CT10	S3(phospho)
EDDDVIVNKPHVsDEEEEEPPFYHHPFK	H9KV01	S13(phospho)
ASEPVKEPVQTAQsPAPVEK	Q6DID3	S14(phospho)
RPPKGEEGsEEEETENGPKPK	Q62018	S9(phospho)
DTFNPYAEKsPEQR	P35917	S10(phospho)
VMHTQcHSTPDsAEDVR	P29699	C6(Carbamidomethyl); S12(phospho)
VGAsFLQR	P05202	S4(phospho)
ScsAAGLHR	Q8BRK8	C2(Carbamidomethyl); S3(phospho)
tQSGNFNTDAPGMAEFR	G3X957	T1(phospho)
LHVsTINLQK	Q9JLN9	S4(phospho)
sDSSPEENGQAVLENTFSQK	E9QAH1	S1(phospho)
SLsVTsLGGLPVWEAER	Q8VCB3	S3(phospho); S6(phospho)
VNLEESTGVENsPAGARPK	Q8BRF7	S12(phospho)
TAsPPPPPK	A2A8V8	S3(phospho)
QQDsQPEEVMDVLEMVESVK	O35691	S4(phospho)
HsLASTDEK	Q91ZX7	S2(phospho)
SAFTPATATGSSPsPVLGQGEK	E9Q3I8	S14(phospho)
RPDGEEEDEEDIDLFEDIDsDEsEGGLFGR	Q9CYN7	S20(phospho); S23(phospho)
AKSPQPPVEEEDEHFDDtVVcLDTYNcDLHFK	G3XA10	T18(phospho); C21(Carbamidomethyl); C27(Carbamidomethyl)
VLKEEALsDGDDFR	P51612	S8(phospho)
SEsLSNcSIGK	P59672	S3(phospho); C7(Carbamidomethyl)
LTLsDGEsGEEKPTKPK	Q61687	S4(phospho); S8(phospho)
AALGLQDsDDEDAAVDIDEQIESMFNSK	F8WHR6	S8(phospho)
HsSETFSAPTR	Q543V3	S2(phospho)
FGsADNIAHLKDPMEDGPPEEAAR	Q3T9T1	S3(phospho)
QQFHsKPADsDSDDDPLEAFMAEVEDQAAR	Q810A7	S5(phospho); S10(phospho)
SSSAsPELK	Q8BTI8	S5(phospho)
KQtPPASPsPQPIEDRPPSSPIYEDAAPFK	Q8BNA5	T3(phospho); S9(phospho)
LsVELTSSLFR	Q02248	S2(phospho)
DLQsPDFTAGFHSDK	Q6ZPR6	S4(phospho)
TPVDYIDLPYSSsPSR	D3Z5J3;E9Q6A3	S13(phospho)
RHsGQDVHVVLK	Q3KQQ1	S3(phospho)
HsNLMLEDLDK	B6ZHD0;A0A068WAQ5	S2(phospho)
KLEKEEEEGISQEsSEEEQ	Q3TVP0	S14(phospho)
tPPLGSAQVPLADcVLTFLAMEcAcPDIDTYR	P40936	T1(phospho); C14(Carbamidomethyl); C23(Carbamidomethyl); C25(Carbamidomethyl)
RQsTDLPTGWEEAYTFEGAR	E9Q6H8	S3(phospho)
AAsSANLLLR	Q8VC03	S3(phospho)
SEsKEDVFGLVPFEEITGSQQQQK	Q91Z96	S3(phospho)
DWEDDsDEDMSNFDR	Q3TJG6	S6(phospho)
AQsPTPSLPASWK	Q91YE8	S3(phospho)
GNTEPVAELEATTDPAPcAsPSSAVPTTKPAER	Q5RIM6	C18(Carbamidomethyl); S20(phospho)
VAAAAGSGPsPPcSPGHDR	Q2TBE6	S10(phospho); C13(Carbamidomethyl)
IVETINsDSDSEFGIPK	Q64511	S7(phospho)
FHDsEGDDtEETEDYR	A0A087WQA0	S4(phospho); T9(phospho)
QPLLLsEDEEDTKR	Q8R1B4	S6(phospho)
APsLTSDSEGK	A2AIX1	S3(phospho)
EMcEGLLEEsDGEDEHEAGR	Q8R126	C3(Carbamidomethyl); S10(phospho)
LsSSDSIGPDVTDILSDIAEEASK	Q925J9	S2(phospho)
ATSRPINLGPsSPNTEIHWTPYR	Q8K0M3	S11(phospho)
LKFsDDEDEEDVVK	F7AYW2	S4(phospho)
AQEHTDTGDRSEsPEEPALEKPPLDK	Q8BYU6	S13(phospho)
LLHEDLDEsDDDVDEK	Q3TS63	S9(phospho)
SEsPEEPALEKPPLDK	Q8BYU6	S3(phospho)
MLAESDDsGDEESVSQTDKTELQSTLR	Q3B7Z2	S8(phospho)
LTQYHGGsLPNVSQLR	Q91X84	S8(phospho)
GtGPGGQLQDLDcssSDDEGATQNTKPSATK	Q9DBG7	T2(phospho); C13(Carbamidomethyl); S14(phospho); S15(phospho)
GYTsDSEVYTDHGRPGK	Q6DFZ1;Q6A099	S4(phospho)
SLsSPPSSK	Q6GSP7	S3(phospho)
TSsVGGHSSQVPLLR	D3YYU9	S3(phospho)
LDsSEMDHSENEDYTMSSPLPGK	Q4VA53	S3(phospho)
AVEGPSPsPEPEEKPAESLAIDPTPGTR	Q3UH06	S8(phospho)
VNsSGESGGEsDEFLQSR	Q05D44	S3(phospho); S11(phospho)
YEDEVFGDsEPELDEEsEDEVEEEQEDR	P97379;Q3U931	S9(phospho); S17(phospho)
RGsTTSIPSPQSDGGDPNQPDDR	Q8C525	S3(phospho)
NITGSsPVADFSAIK	F6W2Q5	S6(phospho)
DGTAPPPQSPSSPGSGQDEDWsDEESPRK	Q99JB8	S22(phospho)
LVsSPEVGHDEFSTQALAR	Q6A087	S3(phospho)
SNsAPLIHGLSDSSPVFQAEAPSAR	Q9DB52	S3(phospho)
HLQPTPEPQsPTEPPAWGSSIVK	A6H8H2	S10(phospho)
RGsGDTSSLIDPDTSLSELR	E9QN52	S3(phospho)
QDsNPKPKPSNEITR	B1AZ15	S3(phospho)
SDSVLPASHGHLPQAGsLER	F7AMS7	S17(phospho)
KEtESEAEDDNLDDLER	A2A8V8	T3(phospho)
NDDGPSGQTSESLKKsEEK	Q8CH25	S16(phospho)
NsPGcQVASNPR	Q9DBR1	S2(phospho); C5(Carbamidomethyl)
EGEsLEDLmK	Q3TJX0	S4(phospho); M9(Oxidation)
NLLEDDsDEEEDFFLR	O70480	S7(phospho)
RGsVSLGNK	Q64442	S3(phospho)
SPsKEPHFTDFEGK	Q9DCP2	S3(phospho)
ENPPVEDsSDEDDKRNPGNLYDK	Q3TDQ1	S8(phospho)
TEMDKsPFNSPSPQDSPR	Q3UHA6	S6(phospho)
DKEVsDDEAEEK	Q3TJU7	S5(phospho)
ETPScPKPVQDTQPPEsPVENSEQLLQTNSGAVAR	Q8VCF0	C5(Carbamidomethyl); S17(phospho)
RLsSTSLASGHSVR	Q3V3F5	S3(phospho)
DQGPEVGVsNRsLVDGK	P58735	S9(phospho); S12(phospho)
SLsNSNPDISGTPTSPDDEVR	E9PX48	S3(phospho)
sPVPSAFSDQSR	Q8BTI8	S1(phospho)
MsGFIYQGK	D3Z0V2	S2(phospho)
sDSELELR	A2A4B3	S1(phospho)
SDSsQPMLLR	Q3TWL4	S4(phospho)
TEEVLSPDGSPsKSPSKK	Q9JLE2	S12(phospho)
AATATRPPGPPPAPQPPsPAPsPPPRPALAR	F6R8S6	S18(phospho); S22(phospho)
IDIsPSTFR	Q569Z6	S4(phospho)
SGISHSVTSDMQTIEQEsPTLAKPR	Q9D8S3	S18(phospho)
AEsPTPGLTQGTEPGAGQEGAMFVHTR	Q6PDG8	S3(phospho)
NSGATADAGSIsPR	Q3TUT3	S12(phospho)
GSGTGHPVPGVAQAPDsPAGVR	Q99L88	S17(phospho)
tFPNHYSIVTGLYPESHGIIDNK	E9QQ26	T1(phospho)
AGsPKPEANLSVEAEEIGER	Q3UGL9	S3(phospho)
MGFPEAAsSFR	P32020	S8(phospho)
sPSELFAQHIVTIVHHVK	Q569Z6	S1(phospho)
AHQsESHLPIGcK	Q9QZK2	S4(phospho); C12(Carbamidomethyl)
KEEDPHTTLHETAsSR	Q80XY1	S14(phospho)
GGDVsPSPYSSSSWR	Q69ZA1	S5(phospho)
IETDEEscDNAHGDADQPAR	E9PWW9	S7(phospho); C8(Carbamidomethyl)
LPVSSsTSNLHVDR	E9Q6P5	S6(phospho)
SEsPKEPEQLR	P49312	S3(phospho)
ELVEPLtPSGEAPNQAHLR	Q01279	T7(phospho)
EVHDELEDLPsPPPPLsPPPTTSPHK	Q8BUV3	S11(phospho); S17(phospho)
DAmNSQFANEDAEsQK	Q8R1S9	M3(Oxidation); S14(phospho)
APTAALsPEPQDSKEDVKK	D3YXK2	S7(phospho)
sLTSPLDDTEVK	Q3TA54	S1(phospho)
EALVEPASEsPRPALAR	P70441	S10(phospho)
KtPEGRASPALGSGHHDGSGDSLEMSSLDR	Q3TSX8	T2(phospho)
TKQPANmILETGQESETTsEEAGDVGK	Q8BI84	M7(Oxidation); S19(phospho)
YGMGTsVER	P35486	S6(phospho)
HLPGSGQQPsPPAR	Q8CGB6	S10(phospho)
TVRPEVNAAAsSDEVcDGDR	Q9WTU0	S11(phospho); C16(Carbamidomethyl)
WAHDKFsGEEGEIEDDEsGTENR	Q569Z6	S7(phospho); S18(phospho)
SSsTSDILEPFTVER	Q6GYP7	S3(phospho)
ADGATsDDLDLHDDR	B9EHJ3;P39447	S6(phospho)
QEsGSSLEPPSGLALEDGAHVLR	F8VQF9	S3(phospho)
SSFDSSTAENHSLSGSLtGSLTGSTLSSASPR	Q8BRK8	T18(phospho)
SSsPVLVEEEPER	Q501J7	S3(phospho)
sDNDDIEVESDADKR	Q8C4Y1	N-Term(Acetyl); S1(phospho)
WAHDKFsGEEGEIEDDESGTENR	Q569Z6	S7(phospho)
DsAAPSPIPASDSLSADPVVTPLPLPLKPGEPGLR	Q6P9Q6	S2(phospho)
LGGGSAEPLSSQsFSFHR	Q99L88	S13(phospho)
SDAEEDGVTGsQDEEDSKPK	P35564	S11(phospho)
DNLGNSNVPDsPIPAEcEAAGR	Q3TZZ3	S11(phospho); C17(Carbamidomethyl)
RPPGcGSFSDAVFDNGPLKPTMPTHPPGTSHsAGsLLEETTVR	E0CX59	C5(Carbamidomethyl); S32(phospho); S35(phospho)
TVQAGDsPSAVR	A0PJK7	S7(phospho)
LsGTGSAGATIR	Q3U6X6	S2(phospho)
HSLsGSSPGMK	Q8BTI8	S4(phospho)
LADAMAEsPSR	F7C0F2	S8(phospho)
SQDATVSPGSEQSEKsPGPIVSR	H3BKM2	S16(phospho)
TNsPSISPsMLSNAEHK	F6U2C2	S3(phospho); S9(phospho)
RAGDVLEDsPK	E0CXA0	S9(phospho)
TVSPGSVsPIHGQGQAVENLK	Q80TG5	S8(phospho)
sGEYScIFLPEPVGR	J3QP71	S1(phospho); C6(Carbamidomethyl)
QSIsFSGLPSGR	Q9DBE5	S4(phospho)
sPTGPSNSFLANMGGTVAHK	Q8JZX4	S1(phospho)
sLTSPLDDTEVKK	Q3TA54	S1(phospho)
IADQcPSsLAIQENANALAR	Q91Y97	C5(Carbamidomethyl); S8(phospho)
LSLPGLLSQVsPR	Q920R0	S11(phospho)
YNLDAsEEEDSNKK	E9PUD0	S6(phospho)
SLsVPAAGTAKPPTLPR	Q3UG84	S3(phospho)
sGSLSLTQFADMISLK	E9PZW0	S1(phospho)
LAGNEALSPTSPsK	Q8C5R2	S13(phospho)
STsPAPADVAPAQEDLR	Q3UR88	S3(phospho)
sVDALDDINRPGSTESGR	D3YYU9	S1(phospho)
NESsSSVQNYFHLDSLQK	Q80VE1	S4(phospho)
sAGEDNDGPVLTDEQK	D3YWC2	S1(phospho)
sSPPAPGTAGPTSPSVALTNLALR	E9Q6E5	N-Term(Acetyl); S1(phospho)
HsPLSSGISTPVTNVSPMHLQHIR	E9Q944	S2(phospho)
SVSEINsDDELPGK	D6RJK7	S7(phospho)
EQELDGLELEELDsSIK	Q8K440	S14(phospho)
AIAsATEGGSVPQIR	Q1L6K5	S4(phospho)
SKsDSYTLDPDTLR	F7CZG3	S3(phospho)
NEVHTMLGQsTEEIR	G3UZM8	S10(phospho)
QTsIETDR	D3YWB4	S3(phospho)
KDsEEEVSLLGNQDIEEGNSR	P15920	S3(phospho)
TAsTPTPPQTGGSLEPQPNGESPQVAVIIRPDDR	E9PVC6	S3(phospho)
VmHTQcHSTPDsAEDVRK	P29699	M2(Oxidation); C6(Carbamidomethyl); S12(phospho)
KDsVPQVLLPEEEK	A2AFJ8	S3(phospho)
AmsQDGASQFQEVILQELELSVK	Q91ZJ5	M2(Oxidation); S3(phospho)
AVEYLLTGIPGSPEPEHGsVQESQAPEQPATEAGENPLEFLR	Q8BRA9	S19(phospho)
WSAPATAsPR	A9JSM3	S8(phospho)
VDIITEEMPENALPsDEDDKDPNDPYR	O54774	S15(phospho)
LDsPTLSR	Q99KF4	S3(phospho)
NSAsLHVLK	Q9JJL3	S4(phospho)
ASPASGHQLsDQEEADHGR	Q3UZ47	S10(phospho)
FFTTGSDSESESSLsGEELVTKPVSGNYGK	Q8R1B4	S15(phospho)
sGSSQELDGKPSASPQER	Q8BTI8	S1(phospho)
RcsVTSVESTVSSGTQTAIQDDPEQFEVIK	A2A5R2	C2(Carbamidomethyl); S3(phospho)
KTsPASLDFPEPQK	Q8K327	S3(phospho)
GGHsDEEEDEGVPASYHTVSLQLLDLMHTLHTR	Q6A099	S4(phospho)
EDsGTFSLGK	Q9WTX2	S3(phospho)
NFDtLDLPK	P98203	T4(phospho)
MPPLIADsPK	Q8BRK8	S8(phospho)
NAIsLPQLNQATYDSLVMGK	Q91W92	S4(phospho)
KLsVGGDSDPPLKR	Q3UZ63	S3(phospho)
DIQNTQcLLNVEHLSAscPHVTLQFADSK	Q3TRW3	C7(Carbamidomethyl); S17(phospho); C18(Carbamidomethyl)
STsVDDTDKSSSEAImVR	B1AZ15	S3(phospho); M16(Oxidation)
RGGGSGGGDEsEGEEVDED	O35295	S11(phospho)
ADGDsDAEDPGAPPEAVGAGQPEDEEDDAEYFR	Q91YU8	S5(phospho)
TVPAAVPGIcFLsGGmSEEDATLNLNAINR	Q91Y97	C10(Carbamidomethyl); S13(phospho); M16(Oxidation)
AITSLLGGGsPK	Q6KCD5	S10(phospho)
GPAGsPcEEGDDVEEDGTsDLRDEASSVTR	Q0P678	S5(phospho); C7(Carbamidomethyl); S19(phospho)
LAsPSGSTSSGLEVVAPEVTSAPVSGPGILDDSATIcR	Q62318	S3(phospho); C37(Carbamidomethyl)
INAAVAsPEAASNQPEAASTHPVTTSTPEDLEQEASQTVGSMK	F7BTZ2	S7(phospho)
SGVAVPtSPK	Q61823	T7(phospho)
AESsDsGAEsEEEEAQEELKGAEQSGSDDKK	Q5XG73	S4(phospho); S6(phospho); S10(phospho)
EEQTDtSDGESVTHHIR	P36916	T6(phospho)
DsDKESGDAEDEVScETVR	Q3UJU9	S2(phospho); C15(Carbamidomethyl)
GsIFPVSVPDAQPIVHPSK	B2KF89	S2(phospho)
sQEIEELER	Q6PEE2	S1(phospho)
RKsPTAPSPQAYSETK	D3Z3H4	S3(phospho)
APsYGAGELLDFSLADAVNQEFLATR	P31001	S3(phospho)
TLsMIEEEIR	O54931	S3(phospho)
KAPsPPPLGLPLR	A2ALU4	S4(phospho)
SIsPSALQDLLR	Q8QZV8	S3(phospho)
GPPQsPVFEGVYNNSR	Q3TGG2	S5(phospho)
IMGTsPLQIDR	Q8C196	S5(phospho)
GPPsPPAPVMHSPSR	Q3TM37	S4(phospho)
tPVDDWTPPAR	Q5SU72	T1(phospho)
DSKsEETLDEGPPK	Q62446	S4(phospho)
AcsVNPPSAIEMQLR	A2AQD6	C2(Carbamidomethyl); S3(phospho)
ENAsPAPGTTAEEAMSR	G3UYQ2	S4(phospho)
RLsVELTSSLFR	Q02248	S3(phospho)
NSsFSVKPSEK	Q8CBI8	S3(phospho)
sTSLLELAPKPTSSINTIDTAPLSSVDSLINK	P59242;D3YUW7	S1(phospho)
NVAEALGHsPK	Q8R3Y8	S9(phospho)
KAsLSSSSTPQSK	F6TQN9	S3(phospho)
AAGGIILTAsHcPGGPGGEFGVK	Q8BVU7	S10(phospho); C12(Carbamidomethyl)
AGsPLcNSNLQDSEEDVEPPSYHLFR	Q3TSU7	S3(phospho); C6(Carbamidomethyl)
sNLDITVGSR	E9Q3L2	S1(phospho)
GGDYALAPGSQTSDLsLPDcK	Q31193	S16(phospho); C20(Carbamidomethyl)
GGPGKLsPR	A2AU91	S7(phospho)
RPPsPDPNTK	Q62261	S4(phospho)
ELSHsPPR	Q8BTI8	S5(phospho)
ALQQHQHGYDsDEEVDSELGTWEHQLR	Q8CH02	S11(phospho)
RDsLTSPEDELGAEVGDEAGDKK	A2A699	S3(phospho)
RESDGtPGGLASLENER	D3Z5J3;E9Q6A3	T6(phospho)
IADPEHDHTGFLtEyVATR	D3Z6D8	T13(phospho); Y15(phospho)
GKsPQLALR	Q99PL6	S3(phospho)
EQSESVNTAPEsPSK	Q99MP8	S12(phospho)
mLPHAPGVQMQAIPEDAVHEDsGDEDGEDPDKR	Q3UXH8	M1(Oxidation); S22(phospho)
mESEAGADDsAEEGDLLDDDDNEDRGDDQLELK	Q9Z204	M1(Oxidation); S10(phospho)
GEGVSQVGPGtPPAPESPR	B9EKJ7	T11(phospho)
EEPLsEEEPcTSTAVPSPEK	Q6DFW4	S5(phospho); C10(Carbamidomethyl)
EDGIDAVEVAADRPGsPR	Q8K1J5	S16(phospho)
VSDQNsPVLPK	B1AY13	S6(phospho)
RsPsPAPPPPPPPPPPR	A2A8V8	S2(phospho); S4(phospho)
RGsDASDFDISEIQSVcSDVETVPQTHRPVPR	Q80VL5	S3(phospho); C17(Carbamidomethyl)
sNLKPDVEHcTGAGTGsPLEEEVR	Q9CWY6	N-Term(Acetyl); C10(Carbamidomethyl); S17(phospho)
AHTPtPGIYMGRPTHSGGGGGGGGGGGGGGGGGGR	E9QP00	T5(phospho)
IsDSESEELPKPR	Q8C1D8	S2(phospho)
SQASPsEDEDTFELR	O70479	S6(phospho)
GTPSSSPVSPQEsPKHESK	D3Z5J3;E9Q6A3	S13(phospho)
mLSVQcATPsPPTSPASPTPPVNPLSSDRPR	Q3UEX8	M1(Oxidation); C6(Carbamidomethyl); S10(phospho)
SFDQLTPEEsKER	G3UY49	S10(phospho)
TDPIsLSNcTEDAR	Q8K3K8	S5(phospho); C9(Carbamidomethyl)
NSQEDsEDsEEKDVK	Q80XU3	S6(phospho); S9(phospho)
sQLDLFDDVGTFASGPPK	Q99K28	S1(phospho)
AMAEEDNGsIGEETDSSPGR	P70302	S9(phospho)
AIEQADLLQEEDEsPR	P61967	S14(phospho)
sGDLGDmEPLK	G3X9V2	S1(phospho); M7(Oxidation)
WVEENVPSSVTDVALPALLDsDEER	Q8BXN9	S21(phospho)
SmsFQGIR	E9PZW0	M2(Oxidation); S3(phospho)
SLIPDIKPLAGQEAVVDLHADDsRISEDETER	Q9JIX8	S23(phospho)
SVsELSLQGR	B9EK92	S3(phospho)
RPSTAIEEDDEDsPSEcHTPEK	E9PZX5	S13(phospho); C17(Carbamidomethyl)
TTPAPsPGSANESFFAPSR	Q9CQ20	S6(phospho)
GTSGsLADVFANTR	Q3UH60	S5(phospho)
TLsSPTGTETNPPK	B1AZ15	S3(phospho)
ALGVISNFQSsPK	Q69ZZ6	S11(phospho)
DFASEAPTAPLSDAcPLsPHR	F6RND9	C15(Carbamidomethyl); S18(phospho)
TLDRsGDLGDMEPLK	G3X9V2	S5(phospho)
GTVTGERQsGDGQESTEPVENK	Q8K3W3	S9(phospho)
LVSFHDDsDEDLLHI	Q80VF2	S8(phospho)
TIGENDEVPVEPEsDsGDEEEEGPIVLGR	H3BLJ6	S14(phospho); S16(phospho)
sLGQWLQEEK	Q8C196	S1(phospho)
MADTGsPGmQR	Q60575	S6(phospho); M9(Oxidation)
QADVADQQTTELPAENGETENQsPAsEEEKEAK	D3Z607	S23(phospho); S26(phospho)
sLDDFQAWLGR	Q6A087	S1(phospho)
cSGPGLsPGMVR	Q6KAM8	C1(Carbamidomethyl); S7(phospho)
ASsFADMMGILK	Q9CWE0	S3(phospho)
SSPKEEVAsEPEEAASPTTPK	A2APD7	S9(phospho)
SEQPLSQVLPSLsPEHK	Q8BTI8	S13(phospho)
QVMGPSGPGFHGNVVSGHPASAATTPGSPsLGR	A0A087WQS0	S30(phospho)
AKGPsPPGAK	Q91XU0	S5(phospho)
NLGSPPKSPtHASPQHTQTEK	Q8C318	T10(phospho)
NVFTsAEELER	D3Z511	S5(phospho)
GsPQAGmDLSFATR	Q99L88	S2(phospho); M7(Oxidation)
TQAQHSSPGEMASsPQGLDNPALLR	A2ADY9	S14(phospho)
RMsDEFEGSFK	Q3U9H3	S3(phospho)
LEGDsDDLLEDsDSEEHSR	S4R1L5	S5(phospho); S12(phospho)
SPFNSPsPQDSPR	Q3UHA6	S7(phospho)
QAsTVEYLPGMLHSNcPK	Q8VE18	S3(phospho); C16(Carbamidomethyl)
GQTPLTEGSEDLDGHsDPEESFAR	Q9CQV4	S16(phospho)
ALSSGPAsPK	Q99JJ1	S8(phospho)
ScSHQTsAPSLK	Q99K70	C2(Carbamidomethyl); S7(phospho)
RPsESDKEEELDK	Q6IR43	S3(phospho)
GLSDHAsLDGQELGAQSR	Q80TA2	S7(phospho)
KAPGFGGFGsSAVSGGSTAAMITETIIETDKPK	Q8C0G7	S10(phospho)
EGETQSGTFEHESQSDFQNSQsPVQEQDKPK	Q3ULB0	S22(phospho)
mQsPAVLR	Q3TC93	N-Term(Acetyl); S3(phospho)
ATLLNVPDLSDsIHSANASER	B9EHJ3;P39447	S12(phospho)
RQsPAPALPIVVQLMEMGFPR	C6EQH2	S3(phospho)
GsFVQDIQSDIHTDSSR	Q5XG73	S2(phospho)
QLANSLEsVGPIDYILPScGIIVSAPR	Q8CDA1	S8(phospho); C19(Carbamidomethyl)
SQsPSPPPLPEDLEK	Q9JIX8	S3(phospho)
SQMsASPGTGGANTAPSTPVMGVDDKPAMEEKPQPPEASPLGHR	Q3TZZ7	S4(phospho)
TKSPtPESSTIASYVTLR	E9Q6H8	T5(phospho)
IAATILtSPDLR	P05202	T7(phospho)
SGKLsQELDFVSHNVR	Q02819	S5(phospho)
DTEcLLQDsSDIEAMEGHR	Q3TUT3	C4(Carbamidomethyl); S9(phospho)
ADEAtAGGSRSEDEDEDDEDYVPYVPLR	Q9CUY2	T5(phospho)
VITAFNDGLNHLDsLK	A8DUK4	S14(phospho)
AELGMNDSPsQSPPVK	Q8C141	S10(phospho)
SDISERPsVDDVEsETGSTGALETR	Q6PHC0	S8(phospho); S14(phospho)
AAKPEQALEPPTMPGTLLRPPEsPQDTVSEIPR	Q99MZ3	S23(phospho)
YDERPGPsPLPHR	Q9CR32	S8(phospho)
GGPPSHPSPVPPSSsSPSPLGGSTLcGGK	Q62311	S15(phospho); C26(Carbamidomethyl)
sPPAATTKPLLR	Q6TCG2	S1(phospho)
KTsDANETEDHLESLIcK	Q3TLK3	S3(phospho); C17(Carbamidomethyl)
QEVLPVLPAPQKEsAEQEGFADILSQK	A2AJ14	S14(phospho)
LTsEDLSDDAFK	Q9DBT9	S3(phospho)
LGNTQGIIsAFSTIMSVHR	Q3TF25	S9(phospho)
EAIQAYSEsLMSPAAK	Q3TZ42	S9(phospho)
SELVLAPAPAPAAtHSPLHR	Q3U912	T14(phospho)
EGSLSPASVSsDTLSDLGISGLQDGLAFHMR	Q5SWU9	S11(phospho)
TGGIGDSRPPsFHPHASGGSQENLDNDTETDSLVSAQR	E9Q150	S11(phospho)
TLsPTPSAEGYQDVR	Q3UP03	S3(phospho)
LsVGLEDEQDLLEDLDR	Q8VCN5	S2(phospho)
GsVSDEEMMELR	Q3TJX0	S2(phospho)
SAtPPPAEPASLPQEPPK	P97379	T3(phospho)
AsQRPDVLTTGGGNPIGDK	P24270	S2(phospho)
KGsSTDISEDWEKDFDLDMTEEEVQMALSK	Q80Y55	S3(phospho)
SGAQASSTPLsPTR	P48678	S11(phospho)
TVLEsGGETGDGDNDTTK	Q3TI79	S5(phospho)
ATFSSMSGLDSVSDsGEGRGSPLR	F6TFN2	S15(phospho)
FLQDHGSDsFLAEHK	Q62446	S9(phospho)
tQTPPLGQTPQLGLK	Q3URI0	T1(phospho)
RGsSIPQFTNSPTMVImVGLPAR	P70266	S3(phospho); M17(Oxidation)
AHEEEEEEEEENRDEEEGEAttEEDDKEEAVASAPSVK	Q80U72	T21(phospho); T22(phospho)
SLPEEsGEETDTVDPVTLYSYK	E0CX69	S6(phospho)
SAsEPSLHR	Q99N57;P04627	S3(phospho)
ARYPsGSEIPVVEDEEK	E3VVQ8	S5(phospho)
KLDEsPVLKPEFIGHDGR	G3UZ69	S5(phospho)
DKsPVREPIDNLTPEER	B7ZD61	S3(phospho)
SQETScPsPASSVASHETPK	V9GXD9	C6(Carbamidomethyl); S8(phospho)
DQGPEVGVsNR	P58735	S9(phospho)
sPSGHPHAR	Q8C306	S1(phospho)
sIDDSEmESPVDDVFYPGTGR	D3YZ00	S1(phospho); M7(Oxidation)
TASTNsIAQAR	Q9DAS9	S6(phospho)
VTTGGNQTGPNsSIR	Q8VCF0	S12(phospho)
VIENTDGsEEEMDAR	O08638	S8(phospho)
IYHLPDAEsDEDEDFK	E9Q3V6	S9(phospho)
SLsEDcEVGGYK	Q9DBW0	S3(phospho); C6(Carbamidomethyl)
DHSSQsEEEVVEGEKEVEALKK	Q91Z78	S6(phospho)
LSsQLSEEKWNSVPPASAGK	Q80WJ7	S3(phospho)
AEsEsDGQAEETADPQSLHSGR	Z4YKC4	S3(phospho); S5(phospho)
GGQEPAGAGSPsPPEDR	Q2TJI9	S12(phospho)
RNsEEFGVK	Q3UZ47	S3(phospho)
sYNLVVAK	B6ZHD0;B6ZHC7	S1(phospho)
EGEEPTVYsDDEEPKDETARK	Q3TFP8	S9(phospho)
SSsVGsSSSYPISSAGPR	E9Q3W4	S3(phospho); S6(phospho)
SFsLDPLMER	Q8CGB6	S3(phospho)
MKsSSSVTTSEAHPSTPcSSDDSDLER	P70460	S3(phospho); C18(Carbamidomethyl)
ELFDYsPPLHK	A0A087WQA0	S6(phospho)
ELsVEEQIKR	Q8BT15	S3(phospho)
TVsISESEEPPLAEPEDEPSKEPSK	Q640L3	S3(phospho)
SMsENAVR	F7B1A4	S3(phospho)
EKEHcDsEGEADAFDPGK	Q3U3P9	C5(Carbamidomethyl); S7(phospho)
LsQETEALGR	Q02819	S2(phospho)
KQVsAGDLFR	Q8R0W0	S4(phospho)
GSEGSQsPGSSVDDAEDDPSR	O35615	S7(phospho)
FIAFSGEGQsLR	Q9CZJ3	S10(phospho)
VLASAAsTAsKGEDLSSQHEPLKK	Q4VA99	S7(phospho); S10(phospho)
NSAsVGIIQR	Q8C0N2	S4(phospho)
AGGsPAsYHGSTSPR	Q5NCM6	S4(phospho); S7(phospho)
SALEHsVQcAVDVK	P24270	S6(phospho); C9(Carbamidomethyl)
SPtNSSEIFTPAHEENVR	Q3UGS4	T3(phospho)
INEsIGQGDLSELPELHALTAGLK	Q8BW35	S4(phospho)
LASGDGDEEQDEEtEDEETEDHLGK	Q3TKX5	T14(phospho)
GKsSPKENPDDSEVPSSSGIDSAK	Q3TMP1	S3(phospho)
VSEEAESQQWDTSKGDQVsQNGLPAEQGSPR	Q62261	S19(phospho)
LTFDSSFsPNTGK	Q3THL7	S8(phospho)
VGsGTNVcELHD	H3BKQ2	S3(phospho); C8(Carbamidomethyl)
AGGSPAsYHGSTSPR	Q5NCM6	S7(phospho)
GLAVAPAsPGK	A2A7S8	S8(phospho)
ERDHsPTPSVFNsDEER	Q9D824	S5(phospho); S13(phospho)
LAsPELER	Q52L49	S3(phospho)
GAPADHGPEGsGGER	Q8CIK3	S11(phospho)
SAsVNKEPIcLPGIMR	F6TFN2	S3(phospho); C10(Carbamidomethyl)
tSPRPSPEAVAIGHVVR	Q4KL35	T1(phospho)
RDsVGGEGDREVLLGDAGPGDLPK	Q3UWI3	S3(phospho)
EHATVEDEERDPsPVAGPALPPNYR	Q69ZC8	S13(phospho)
LPsVEEAEVSKPSPPASK	P57016	S3(phospho)
NFsDNQLQEGK	Q9WVA4	S3(phospho)
ILEGDNGLDsDMEEEADDGcK	Q3TUU0	S10(phospho); C20(Carbamidomethyl)
TNPPTQKPPsPPVSGR	Q3UBL3	S10(phospho)
DLQQSIEAAsDEEDLR	Q99JB8	S10(phospho)
sRsPLDKDAYAPSSSVVGTSVGSHR	Q66JP8	S1(phospho); S3(phospho)
KLsSAMSAAK	P14152	S3(phospho)
EELEQQtDGDcDEEDDDKDGEVPK	Q8CIK3	T7(phospho); C11(Carbamidomethyl)
GLATGDsPLGPMTHHGEEDWVYER	Q91XF0	S7(phospho)
LINSELGsPSR	Q3UDW8	S8(phospho)
VSALEEDmDDVEssEEEEEEDEKLER	Q4FK66	M8(Oxidation); S13(phospho); S14(phospho)
sLDGAAAAESTDRSPRPTSAPAIAQSQVTEGPGAPIK	A0A068WAQ5	S1(phospho)
VPGPSsSENQEGTLTDSmK	Q62313	S6(phospho); M18(Oxidation)
RVtNPGSLPPVLLVIPNAWGR	Q5F2F2	T3(phospho)
KLPsQSEMMAEINK	Q3UV28	S4(phospho)
sLTLDAAPDHNPPcR	F6S397	S1(phospho); C14(Carbamidomethyl)
WDsYDNFSGHR	A0A087WQS0	S3(phospho)
GTEETSWsGEER	Q5U4C3	S8(phospho)
LLKPGEEPSEYtDEEDTKDHSK	Q80UU9	T12(phospho)
DMPGGFLFDGLsDDEDDFHPSTR	Q52L66	S12(phospho)
AIAEPEsPGESR	Q3UZ47	S7(phospho)
VADPDHDHTGFLtEyVATR	O35558	T13(phospho); Y15(phospho)
IEDsEPHIPLIDDTDAEDDAPTKR	G5E829	S4(phospho)
NFETNDLAFsPK	Q9WU19	S10(phospho)
GGssGEELEDEEPVKK	Q3UMU9	S3(phospho); S4(phospho)
RSsQPsPTTVPASDSPPAK	A2AJI1	S3(phospho); S6(phospho)
LEGDsDVDsELEDR	Q9JMH9	S5(phospho); S9(phospho)
LSSSSATLLNsPDR	O88735	S11(phospho)
GAtPAEDDEDKDIDLFGsDEEEEDKEAAR	D3YUQ9;D3YZT9	T3(phospho); S18(phospho)
AATATRPPGPPPAPQPPsPAPSPPPRPALAR	F6R8S6	S18(phospho)
GLPSPYNMSAPGsR	E9PZW0	S13(phospho)
VLSGEDKsNIK	Q91VB8	S8(phospho)
NSSsPVSPASVPGQR	Q8K3X4	S4(phospho)
sLQSQPGTQTLAEAEDGPPTK	Q9D2E2	S1(phospho)
IGELGAPEVWGLsPK	Q5EBJ1	S13(phospho)
GIGFGQGAGcLSTDTGEHLGLQFQQsPKPAR	P50462	C10(Carbamidomethyl); S26(phospho)
KEEQAASPVAEDVGDVGVssDDEKR	Q3UWC4	S19(phospho); S20(phospho)
sLPTTVPESPNYR	Q6ZQ58	S1(phospho)
KQsQSQDVLVLEDSK	Q8VI47	S3(phospho)
MLPHAPGVQmQAIPEDAIPEEsGDEDEEDPDKR	D3YYI8	M10(Oxidation); S22(phospho)
AQTLPTSVVTITSESsPGKR	Q62261	S16(phospho)
RcDVQEDsEGsETDDNKDSTPFEDNEVQDEFLEK	Q9Z277	C2(Carbamidomethyl); S8(phospho); S11(phospho)
FVsEGDGGR	Q61823	S3(phospho)
IIPTSAsKTEAPAAAK	Q3TA54	S7(phospho)
YsPSQNSPIHHIPSR	A0A087WQA0	S2(phospho)
KGDRsPEPGQTWTHEVFSSR	E9Q616	S5(phospho)
EQsQAGLTSLDTDDR	Q283N4	S3(phospho)
RAsGPGIPPAAEPSALSTK	Q61526	S3(phospho)
KVsLVLEQMQPLGMVSPASTK	P59242	S3(phospho)
SLSQsFENLLDEPAYGLIQK	Q4TVN0	S5(phospho)
sLDGAAAESTDR	Q3UH12	S1(phospho)
RGsDIDNPTLTVTDISPPSR	G5E8L8	S3(phospho)
EEsDGEYDEFGR	E9PUD0	S3(phospho)
ETVFTKsPYQEFTDHLVK	Q3TXR5	S7(phospho)
GRDsPYQSR	F6RTE1	S4(phospho)
SPsWEPFR	D3YZ06	S3(phospho)
RQDsAGPILDGAR	D3Z3H4	S4(phospho)
sLLDASEEAIK	Q64727	S1(phospho)
ELEKPmQSKPQSPVIQATAGsPK	A2A5R2	M6(Oxidation); S21(phospho)
sHNDFVAILDLPEGEHQYK	D6RG50	S1(phospho)
FGIHVYQFPEcDsDEDEDFKQQDR	Q68FM0	C11(Carbamidomethyl); S13(phospho)
QEsDPEDDDVKKPALQSSVVATSK	O35691	S3(phospho)
FGGsGSQVDSAR	Q3TI61	S4(phospho)
AVNPTmAAPGsPSLSHR	A0A087WQS0	M6(Oxidation); S11(phospho)
LGLAVIHGEAQcTELDmDDGRHsPPMVK	Q8BK29	C12(Carbamidomethyl); M17(Oxidation); S23(phospho)
GEPNVSyIcSR	D3Z7E5	Y7(phospho); C9(Carbamidomethyl)
sVDLDAFVAR	B2RRE8	S1(phospho)
AIIHAINDDNVPGLQHLLGSLsSYDVNQPNK	Q3UKP8	S22(phospho)
RAsSEIVTEGK	Q9CRF0	S3(phospho)
sAPAGsPHPAAGAR	Q80ZX0	N-Term(Acetyl); S6(phospho)
GDsETDLEALFNAVMNPK	P46938	S3(phospho)
AEDGAAPSPsSETPK	Q05BL6	S10(phospho)
LSSQLsEEK	Q80WJ7	S6(phospho)
VPGENGsPEMFLSHALAER	Q8C0Q2	S7(phospho)
QLsVPAsDEEDEVPAPIPR	Q6P542	S3(phospho); S7(phospho)
QKsDAEEDGVTGsQDEEDSKPK	P35564	S3(phospho); S13(phospho)
sDSMIHLQEPVHQASDSETLSR	Q810W1	S1(phospho)
NTVDLVNTHHLHSSsDDEDDRLK	B2RUA5	S15(phospho)
AQDKPEsPSGSTQIQR	Q3TRT6	S7(phospho)
SSLGQSAsETEEDTVSISK	Q3UAI4	S8(phospho)
FIDKDQQPsGsEGEDDDAEAALK	Q99J36	S9(phospho); S11(phospho)
KSPSGPVKsPPLSPVGTtPVK	Q922M7	S9(phospho); T18(phospho)
ATAPQTQHVsPmR	D3YUQ9;D3YZT9	S10(phospho); M12(Oxidation)
LScsLEDLR	G3X957	C3(Carbamidomethyl); S4(phospho)
MPsPEVEEAScSR	E9Q577	S3(phospho); C11(Carbamidomethyl)
EIITEEPsEEEADMPKPK	Q9CWZ5	S8(phospho)
IIPTLEEGLQLPsPTATSQLPLESDAVEcLNYQHYK	H3BLL4	S13(phospho); C29(Carbamidomethyl)
LNATAsLEQDKIEPPR	Q3UN10	S6(phospho)
GSGNHLLELsNSmVDSQESR	Q8BWS5	S10(phospho); M13(Oxidation)
aADVSVTHRPPLsPEAEAEAETPETVDR	Q9CW46	N-Term(Acetyl); S13(phospho)
LKFsDDEDEEDVVKDGR	F7AYW2	S4(phospho)
RVsISEGDDKIEYR	P35550	S3(phospho)
LIRPEYAWIVQPASGAVSDRPGAsPK	Q9Z0W3	S24(phospho)
TEmDKsPFNSPSPQDSPR	Q3UHA6	M3(Oxidation); S6(phospho)
sPDPEMVPR	A2AIX1	S1(phospho)
AEAKEESEEsDEDMGFGLFD	E9Q070	S10(phospho)
QGMsPTFSR	Q69ZX8	S4(phospho)
RVsVcAETFNPDEEEEDNDPR	P12367	S3(phospho); C5(Carbamidomethyl)
AKPAAQSEEEtAtSPAASPTPQSAER	Q8JZQ9	T11(phospho); T13(phospho)
WDKDDFEsEEEDVK	P97868	S8(phospho)
HIKEEPLsEEEPcTSTAVPsPEKK	Q6DFW4	S8(phospho); C13(Carbamidomethyl); S20(phospho)
mHGHGGYDSDFsDDEQGGGSSK	Q8BP78	N-Term(Acetyl); S12(phospho)
SRtSVQTEDDQLIAGQSAR	P26231	T3(phospho)
RLsGDLNSIQPSGALSVHLSPPQTVLSR	Q99MZ3	S3(phospho)
sPVGDTGLGK	B9EKJ7	S1(phospho)
KGsPTPAYPER	Q148V8	S3(phospho)
sASTLcLPEVGLAR	Q497Z4	S1(phospho); C6(Carbamidomethyl)
TSsLPESSPSK	Q8BT15	S3(phospho)
EQTAsAPATPLVSK	B1AZ15	S5(phospho)
QsSTADAPEAQHEPGITITEWK	F7DF70	S2(phospho)
sATPVNcDQPDILASPTAGSGGHSASGPATEQcEAVENQPK	D6RJK7	S1(phospho); C7(Carbamidomethyl); C33(Carbamidomethyl)
FcTGDsPPLEAK	Q8C0J6	C2(Carbamidomethyl); S6(phospho)
RSsDGsLSHEDLAK	B2RXW8	S3(phospho); S6(phospho)
NEAGGLSLSPsPER	P59222	S11(phospho)
KAsGPPVSELITK	P15864;P43277	S3(phospho)
VIHDNFGIVEGLmTTVHAITAtQK	S4R257	M13(Oxidation); T22(phospho)
VLQKPsVFGsDSDDDETSVSESLQR	Q8BQY7	S6(phospho); S10(phospho)
KVPEQPPELPQLDsQHL	Q02819	S14(phospho)
QDTPLLYALAAEAEATAHTAEPPSPPAsR	D3Z3D5	S28(phospho)
VPGPsSSENQEGTLTDSMK	Q62313	S5(phospho)
RVsVELTNSLFK	Q02257	S3(phospho)
YGLQDsDEEEEEHPPK	Q3TPG3	S6(phospho)
VEPAWHDQDETSsVKsDGAGGAR	Q6ZQ58	S13(phospho); S16(phospho)
sPPPFPGEPWK	Q9JK92	S1(phospho)
AsLGTLSQEAALNTSDPESHAPTMRPSMsGLHLVK	E9Q4Z2	S2(phospho); S29(phospho)
SDLIEDEELEDTGKGsEDEWEQVGPK	P52479	S16(phospho)
MSSEGPPRMsPK	F6U2C2	S10(phospho)
KsPTMEQAVQTASAHLPAPAPVGR	Q8K2F8	S2(phospho)
AsDPGLPAEEPK	Q6P9L1	S2(phospho)
AsSPPSSTIPSTSLQLSVPK	Q6P3Y5	S2(phospho)
TGQAGSLSGsPKPFSPQAPTPIMTKPDK	Q80XT8	S10(phospho)
ALLsPTFTSGK	Q52L54	S4(phospho)
AQLsPGLYDDSSAR	Q5RIM6	S4(phospho)
RPHHSQPASAcGSLSPASQTSPPsPPPPLVPPVPEDLHR	D3Z5J3	C11(Carbamidomethyl); S24(phospho)
TQPTDEEMLFIySHFK	P31786	Y12(phospho)
EGsVLDILK	E9Q3G8	S3(phospho)
DmPGGFLFDGLsDDEDDFHPSTR	Q52L66	M2(Oxidation); S12(phospho)
SAKsEESLTSLHAVDGDSK	I7HFI3	S4(phospho)
APsPAPSSVPLGSEKPSSVSQDR	E9QKG6	S3(phospho)
sFHLGTGDTNLR	D3Z0R1	N-Term(Acetyl); S1(phospho)
AsFETLPNISDLcLK	Q9CWE0	S2(phospho); C13(Carbamidomethyl)
VAILtDDEEEQK	Q8CBH5	T5(phospho)
sPsPEPIYNSEGK	D3YVH4	S1(phospho); S3(phospho)
NsSPAVPAPTPEGVQAVNTTK	O08784	S2(phospho)
SKFDsDEEDEDAENLEAVSSGK	A2AJT4	S5(phospho)
NQsSEDILR	Q8CG79	S3(phospho)
GASPSPtFHPPK	Q8BVZ1	T7(phospho)
RTSmGGtQQQFVEGVR	Q02248	M4(Oxidation); T7(phospho)
HAGsAGALLDFGQPAHAQK	Q4VAC9	S4(phospho)
EAGLSQsHDDLSNTTATPSVR	Q6PHC0	S7(phospho)
ESSPNSNPStSPGGIR	Q3U4D5	T10(phospho)
aAAVAAAGAGEPLsPEELLPK	Q3UBW3	N-Term(Acetyl); S14(phospho)
RISSSsAQPcVEEASAPQDSLAQGK	Q6PAR9	S6(phospho); C10(Carbamidomethyl)
RKPVLPALTINPTIAEGPSPTSEGAsEANLVDLQK	M0QWN2	S26(phospho)
TNsQDKIEFHNEVDGGK	Q3U382	S3(phospho)
GAGGYTcQsGSGWDEFTK	E9PZW0	C7(Carbamidomethyl); S9(phospho)
DKFsPTQDRPESSTVLK	Q8BTI8	S4(phospho)
RsPVSPQLQQQHQAAAAAFLQQR	Q812E0	S2(phospho)
HPVGSHQVPGLHSSVVTTPGsPSLGR	A0A087WQS0	S21(phospho)
SASQSsLDKLDQELK	F6WNT4	S6(phospho)
mEASAAEQPSsPPPPLGDHcIHDGDFVVLK	Q8CE96	N-Term(Acetyl); S11(phospho); C20(Carbamidomethyl)
ELEELsLEAQGIR	Q05D44	S6(phospho)
PGEtEEPRSPEQQDQEGGPAAAADAASEELRPGAAAAPAAPAETASSR	E0CY81	T4(phospho)
NTGASSGAtSEESTEAEFcR	P70302	T9(phospho); C19(Carbamidomethyl)
SSsQIPEGFGLTSGGSNYSLAR	Q920I9	S3(phospho)
LGEsQTLQQFSR	A3KGU5	S4(phospho)
LPELNWRsDEEDEDSDFGEEQR	Q61586	S8(phospho)
APQQQPPPQQPPPPQPPPQQPPPPPsYSPAR	Q8VDM6	S26(phospho)
SsSEDKITVHFK	Q3UG56	S2(phospho)
QSNASsDVEVEEK	A2BI12	S6(phospho)
TYsEcEDGTYSPEISWHHGK	Q99LH2	S3(phospho); C5(Carbamidomethyl)
AsGDKEAEGAPQVEAGK	F6RGN9	S2(phospho)
sDQEAKPSTEDLGDKK	Q8BT45	N-Term(Acetyl); S1(phospho)
LLGLNELDDLLGKEsPSK	Q3UIX3	S15(phospho)
SsDGsLSHEDLAK	B2RXW8	S2(phospho); S5(phospho)
SYsLSELSVLQAK	Q921I6	S3(phospho)
SSGsLSPGLETEDPLEAR	B9EKJ7	S4(phospho)
FQEQEcPPsPEPTRK	Q9CTF6	C6(Carbamidomethyl); S9(phospho)
sSITPGTVLIILTGR	P47911	S1(phospho)
NsLTGEEGELVK	Q9JI99	S2(phospho)
ETENQGLDIsSPGMSGHR	Q8BPH4	S10(phospho)
SEtPPHWR	Q504N1	T3(phospho)
IYVVDVGsEPR	P17563	S8(phospho)
LQEsPAPEKGEVLGDALQLDTLK	E9Q7G0	S4(phospho)
TSFSVGsDDELGPIR	Q3TSU7	S7(phospho)
TTPLASPSLsPGR	Q8CJF7	S10(phospho)
VQNHLPASGPPQPPAAsPTR	E9PYQ1	S17(phospho)
SIVPSsPQSQR	F6WBP9	S6(phospho)
VsPAAAQLADTFFGK	Q6PDK2	S2(phospho)
sLDGAAAAESTDRSPRPTSAPAIAQSQVTEGPGAPIKK	A0A068WAQ5	S1(phospho)
EVSMDDHKLsLDELHR	Q3TXF9	S10(phospho)
ALGQAASDSsGPEDMKR	Q6GQT9	S10(phospho)
FGGFVAWNsLGQPHVNGR	Q8BXN7	S9(phospho)
LsPENNQVLTK	Q8VE65	S2(phospho)
aAAAAAAAAAGDsDSWDADTFSmEDPVR	Q3UGC7	N-Term(Acetyl); S13(phospho); M23(Oxidation)
ASsPSPLTVGTAESQR	Q91YD3	S3(phospho)
GDNAsPSPSGTPLVR	Q3TE28	S5(phospho)
QIsYNcSDLDQSNVTEETPEGEEHPVADTENK	Q9CY58	S3(phospho); C6(Carbamidomethyl)
FGsADNIPNLK	Q69ZZ6	S3(phospho)
LEAsYSDSPPGEEDLLVHVAEGSK	A0A087WRG3	S4(phospho)
EsEEVSDSELEQTDScTDPLPEGR	Q3TUQ8	S2(phospho); C16(Carbamidomethyl)
KQsQSQDVLVLEDSKK	Q8VI47	S3(phospho)
STSIDTGPTEsPASLK	E9Q3I8	S11(phospho)
sASSDTSEELNSQDsPKR	P70441	S1(phospho); S15(phospho)
GsVSDEEmmELR	Q3TJX0	S2(phospho); M8(Oxidation); M9(Oxidation)
YSPTsPTYSPTSPK	O08847	S5(phospho)
SSmsGLHLVK	Q5SWU9	M3(Oxidation); S4(phospho)
EIsDDEAEEEKGEK	P11499	S3(phospho)
EMLAsDDEEESSPK	G4W8R4	S5(phospho)
sTGDITAAGVTEASR	Q9Z0U1	S1(phospho)
GDQVSQNGLPAEQGsPR	Q62261	S15(phospho)
mLSQDsNDDTEDVSLFDAEEETTNRPR	Q9D8T4	N-Term(Acetyl); S6(phospho)
EEALQNISADDLPDSAsQAAHPQDSAFSYR	F7ADQ2	S17(phospho)
ISEmGGKDsAETLVLQSQK	Q8BUM4	M4(Oxidation); S9(phospho)
sPQMVSAIVR	Q02248	S1(phospho)
HGsWGSGLDMHTKPWIR	O35490	S3(phospho)
SsIHNFMTHPEFR	G5E829	S2(phospho)
SLsVTSLGGLPVWEAER	Q8VCB3	S3(phospho)
FWsVDDTQVHTEYSSLR	P49429	S3(phospho)
sSPKEEVAsEPEEAASPTTPK	A2APD7	S1(phospho); S9(phospho)
RGsSIPQFTNSPTMVIMVGLPAR	P70266	S3(phospho)
tPPKDLPAIPGVTSPTSDEPPMQASQSQLPSSPEDK	Q3TII9	T1(phospho)
DHssQsEEEVVEGEKEVEALKK	Q91Z78	S3(phospho); S4(phospho); S6(phospho)
AERLsPPASSGSER	Q99MZ3	S5(phospho)
GNAsPVLDPSDLILTR	Q8VCE2	S4(phospho)
sLQSLLGPSSK	Q9D2V7	S1(phospho)
RLsLESEGANEGATAAPELSALEEAFR	Q7TQD2	S3(phospho)
HPINDENQDGVMHSDGTGNLEEEQEsEGETYEDIDSSK	O35601	S26(phospho)
WDsYENFNQHHEDsVDGALAHTR	Q8CGB6	S3(phospho); S14(phospho)
HLsGSSSPPPR	Q3UIL6	S3(phospho)
DIHcsDEEDVLcHIK	Q8BMB4	C4(Carbamidomethyl); S5(phospho); C12(Carbamidomethyl)
SRtAsLTSAASIDGSR	Q9QYG0	T3(phospho); S5(phospho)
KEESEEsEDDmGFGLFD	P47955	S7(phospho); M11(Oxidation)
ASVASDPEsPPGGNEPAAASGQR	D3Z4K1	S9(phospho)
AKsIEADDPFKDR	D3Z3A3	S3(phospho)
HPPGSSITNsPALMAK	A6H8H2	S10(phospho)
LsSAMSAAK	P14152	S2(phospho)
HDDLQTDESsMDDGHPR	Q6VN19	S10(phospho)
KEEENVDsDDEGELQDLLSQDWR	F8QZ85	S8(phospho)
NNsPAPPQPAPVK	Q14AX6	S3(phospho)
sPEEDQEPIISHQKPGK	Q8CB77	S1(phospho)
TASEsISNLSEAGSVK	D3Z3M7	S5(phospho)
SsSKGSVEEMMSQPK	B1ATR2	S2(phospho)
YHGHsmSDPGVSYR	P35486	S5(phospho); M6(Oxidation)
QScLHPFTEDDAVDPNDsDIDPESR	Q8BPY1	C3(Carbamidomethyl); S18(phospho)
sLGVGEKDWTSSVEAR	B9EKJ7	S1(phospho)
SAQASSsEKEPcAPLTIPSIR	A2AQD6	S7(phospho); C12(Carbamidomethyl)
VFVcDQLEsPTGFcLDSAPSHK	Q3UGS6	C4(Carbamidomethyl); S9(phospho); C14(Carbamidomethyl)
AsLSSmDR	Q8VCS9	S2(phospho); M6(Oxidation)
KLPELNWRsDEEDEDSDFGEEQR	Q61586	S9(phospho)
sAASREDLAGPDIGASPQGGR	A0A087WQ61	S1(phospho)
AFPDKFHLEPTsPPTTDGFK	Q8VCB3	S12(phospho)
GsRGSLNEQIALVLIR	Q5XG73	S2(phospho)
SMsFQGIR	E9PZW0	S3(phospho)
sPGHMVILNQTK	Q8CH25	S1(phospho)
DDGsWEVIEGYR	P26443	S4(phospho)
QLGSEcLHVsPK	O55137	C6(Carbamidomethyl); S10(phospho)
ERsPALKsPLQSVVVR	Q569Z6	S3(phospho); S8(phospho)
KLEKEEEEGISQEssEEEQ	Q3TVP0	S14(phospho); S15(phospho)
REDsPGPEVQPMDK	D3YUY7	S4(phospho)
GGRsPDEVTLTSIVPTR	Q99JB8	S4(phospho)
QKDFDISEQNDssDEEKQR	F6ZL86	S12(phospho); S13(phospho)
RSsSELSPEVVEK	Q8BTI8	S3(phospho)
GHFQPLENQSEcLsPELR	Q6P8W7	C12(Carbamidomethyl); S14(phospho)
LHsAPNLSDFHVVRPK	Q80TT3	S3(phospho)
tDDQDcAAELEKVDsSSEDGVDAKPDR	P97864	N-Term(Acetyl); C6(Carbamidomethyl); S15(phospho)
GsVSDEEMmELR	Q3TJX0	S2(phospho); M9(Oxidation)
TRtSLHALTVDLPK	D3Z4C0;Q91VS8	T3(phospho)
LGIAVIHGEAQDAESDLVDGRHsPPmVR	Q05BD4	S23(phospho); M26(Oxidation)
SLSPAATVTAELHYEQGsPR	Q6PHC0	S18(phospho)
VSAVAVAPTSVHSSVGHtPIATVPAMPQEK	A2AVJ7	T18(phospho)
sDSGEQNYGEREsR	P62996	N-Term(Acetyl); S13(phospho)
GGPAEAPsPR	Q8C3N3	S8(phospho)
IAVDLsDQEEETAGKNENLAPGDWPR	H3BKV3	S6(phospho)
QmNmsPPPGNAGPVIMSLEEK	D3YUB9	M2(Oxidation); M4(Oxidation); S5(phospho)
YGmGTsVER	P35486	M3(Oxidation); S6(phospho)
LRLsPSPTSQR	P48678	S4(phospho)
TIEQASFsK	Q5K4Q9	S8(phospho)
GQNGEDLSTGGAsPSAEGEPMSESLVQPGHDSEATK	Q8R409	S13(phospho)
VEmGTSSQNDVDMSWIPQETLNQINKAsPR	Q3TV94	M3(Oxidation); S28(phospho)
VKAsPITNDGEDEFVPsDGLDKDEYAFSSGK	Q64511	S4(phospho); S17(phospho)
FDIYDPFHPTDEAYsPPPAPEQK	Q5U4C3	S15(phospho)
RGsPGGVEMNVELPQQEGDDDDDEDEEAAAGR	Q9D6W8	S3(phospho)
SAsSSQELGEEEPAR	D3Z3D5	S3(phospho)
sVSKESVASMGADSGDDFASDGSSSR	Q05CJ8	S1(phospho)
SKSEAsLLQLLSGTPAAR	B1AS67	S6(phospho)
EEDcHSPtSKPPKPDQPLK	Q3THB0	C4(Carbamidomethyl); T8(phospho)
EIsDDEAEEEK	P11499	S3(phospho)
TPISTPVSGTPQPsPMIER	Q9DBJ3	S14(phospho)
aEQEPTAEQLAQIAAENEEDEHsVNYKPPAQK	Q99PT1	N-Term(Acetyl); S23(phospho)
LYADsDsGEDSDKR	O35071	S5(phospho); S7(phospho)
TNsMSFLPVVK	E9QP46	S3(phospho)
TSsPTSLPPLAR	Z4YKC4	S3(phospho)
smSDVSAEDVQNLR	F6TFN2	S1(phospho); M2(Oxidation)
TAQVPsPPR	Q9JIX8	S6(phospho)
SMsHQAAIASQR	Q8C0E2	S3(phospho)
RSPAsPHPPPFTHR	Q3U4E1	S5(phospho)
sTVHEILcK	B0V2N8	N-Term(Acetyl); S1(phospho); C8(Carbamidomethyl)
TNSPSIsPSMLSNAEHK	F6U2C2	S7(phospho)
TAsFSESR	Q3TS02	S3(phospho)
mQAESQsPTNVDLEDKER	B9EKJ7	M1(Oxidation); S7(phospho)
VEQLsSGLEHDNLEAHSPEQPPR	Q99K01	S5(phospho)
YSDVEVPASVTGHSFASDGDsGTcSPLRHSFQK	Q8K232	S21(phospho); C24(Carbamidomethyl)
AGsREPVEDPQSGSSGK	Q3UZ39	S3(phospho)
EDNsEGEEILEEVGGDPEEEDDHHmEFcR	Q3U582	S4(phospho); M25(Oxidation); C28(Carbamidomethyl)
EASPsTLNDK	P54254	S5(phospho)
MEHIPESRPLsPTAFSLESLRK	Q9D3I5	S11(phospho)
IDsPGLKPASQQK	P39447	S3(phospho)
SLEPsENVHGAGGAFPASQTPSKPASADGHR	Q3UKD6	S5(phospho)
AVNPTMAAPGsPSLSHR	A0A087WQS0	S11(phospho)
GAELGPEPLELsDsGDDAGWEDEDADTEPAHGR	D6RGQ1	S12(phospho); S14(phospho)
sPPIFLSGK	Q3UHU8	S1(phospho)
KEsAPQVLLPEEEK	D3Z0V2	S3(phospho)
AAsPSPQSVR	A2A8V8	S3(phospho)
KEVQsPEQVK	A0A087WQA0	S5(phospho)
SEAQQPMHPKPLsPDAR	Q8BT15	S13(phospho)
TNsLSLIR	Q8C729	S3(phospho)
VIEPPAAScPSsPR	Q3UYI5	C9(Carbamidomethyl); S12(phospho)
RSssPAELELKDDLQQAHGR	F7CGP0	S3(phospho); S4(phospho)
YIVDADDRsGEYScIFLPEPVGR	J3QP71	S9(phospho); C14(Carbamidomethyl)
GAQEAEENPDADREFDDEsSEDGEKR	Q8BQY7	S19(phospho)
asGVAVSDGVIK	P18760	N-Term(Acetyl); S2(phospho)
sMPVLGSVSSVTK	Q8K2Q9	S1(phospho)
QEsDPEDDDVK	O35691	S3(phospho)
ESPRPPAAAEAPAGsDGEDGGR	Q6ZQ58	S15(phospho)
AKGsPKPAAVEAVTAAGSQHIQTLTDEVTK	F6W0G8	S4(phospho)
SDLLIDENLLsPLAGEDDPFLLEGDVNEDcKPLILPDTKPK	E9Q310	S11(phospho); C30(Carbamidomethyl)
EGsPIPHDPDLGSK	P42128	S3(phospho)
RTsPSEGAmANDESAEVmGDGESAHDSPR	F7ADQ2	S3(phospho); M9(Oxidation); M18(Oxidation)
GsVSLGNK	Q64442	S2(phospho)
AGsLKDPEIAELFFK	Q5F2E8	S3(phospho)
SPDsPGPSPSADR	Q3TAF8	S4(phospho)
EEVAsEPEEAASPTTPK	A2APD7	S5(phospho)
NREPPPPGsPPASPGPQSPSTK	Q3UYI5	S9(phospho)
INPYMsSPcHIEMILTEK	Q6PHZ1	S6(phospho); C9(Carbamidomethyl)
SPEDsQTDSPVETPQPR	Q3UZ47	S5(phospho)
LsQELDFVSHNVR	Q02819	S2(phospho)
DYEIENQNPLAsPTNTLLGSAK	Q5F2E7	S12(phospho)
LEsPKPVESFASMLR	Q9CY16	S3(phospho)
sQEDLNEPIKR	A0A087WS18	S1(phospho)
tASPPPPPKR	A2A8V8	T1(phospho)
sETAPAAPAAPAPVEK	P43277	N-Term(Acetyl); S1(phospho)
sETAPAETAAPAPVEKsPAK	Q1WWK3	N-Term(Acetyl); S17(phospho)
AVsETEDLQGPR	Q9DCH6	S3(phospho)
DGNGYIsAAELR	P62204	S7(phospho)
LQEEGGsEEEEAGNPSEDGMQSGPTQAPPR	E9QAL6	S7(phospho)
LGVSVsPSR	Q0P678	S6(phospho)
YNsYDINR	A2RSQ0	S3(phospho)
ADsVPNLEPSEESLVTK	Q7TQ95	S3(phospho)
SLsPPWEQDR	Q3TZZ3	S3(phospho)
DKYEPAAVsEHGDK	Q3TXF9	S9(phospho)
VIsHDRDSPPPPPPPPPPPQPQPTLK	A2AIV2	S3(phospho)
SHsPSMSQSGSQLR	F6TFN2	S3(phospho)
EENLPEEsEEQKQSEAK	Q8BXA1	S8(phospho)
KQsVFGASSLPAGVGVPEQLDR	P70227	S3(phospho)
SVcGHLENTsVGNsPNPSSAENSFR	Q8CAP5	C3(Carbamidomethyl); S10(phospho); S14(phospho)
ELDEVDMSDLsPEEQWR	F6XTP0	S11(phospho)
NKLEGDsDVDSELEDRVDGVK	Q9JMH9	S7(phospho)
KHsQTDLVSR	A2AGS6	S3(phospho)
TNPsPTNPFSSDLQK	Q9QZS3	S4(phospho)
GFGDGYNGYGGGPGGGNFGGsPGYGGGR	B7ZP22	S21(phospho)
QQQsFTNPTLIK	Q9D0K1	S4(phospho)
IHRAsDPGLPAEEPK	Q6P9L1	S5(phospho)
LKsVEDEmDSPGEEPFYTGQGR	B1AUB9	S3(phospho); M8(Oxidation)
SEsGKEDDKK	Q8CIK3	S3(phospho)
KVsLELGGK	Q8CIF2	S3(phospho)
DMsPSAETEAPLAK	P27546	S3(phospho)
RQSsLTFQSSDPEHVR	B1AZ15	S4(phospho)
ALSTDPAsPNLK	P26039	S8(phospho)
MLENQSsLLSGSSGIFK	Q7TPW2	S7(phospho)
aEAcEPTRPsEDEDEEREPLLPR	Q8CBQ5	N-Term(Acetyl); C4(Carbamidomethyl); S10(phospho)
SPsPVHLPEDPK	Q6A0A2	S3(phospho)
KPENPsESDTEEPTIcGPTQDDFHMK	Q9D2C2	S6(phospho); C16(Carbamidomethyl)
VEPAVSsIVNSIQVLASK	A2AVJ7	S7(phospho)
LGIAVIHGEAQDAESDLVDGRHsPPMVR	Q05BD4	S23(phospho)
QDVFGEGsEERK	J3QNE8	S8(phospho)
sTSATDTHHVELAR	O55028	S1(phospho)
EDAPPEDKEsESEAK	Q6PBC0	S10(phospho)
mETVSNASSSSNPSsPGR	Q4VA53	M1(Oxidation); S15(phospho)
GTGPGGQLQDLDcssSDDEGATQNTKPSATK	Q9DBG7	C13(Carbamidomethyl); S14(phospho); S15(phospho)
KTsLSASPFEHSSSR	Q3UGL9	S3(phospho)
AAVsGLWGK	A8DUK4	S4(phospho)
AsPALGSGHHDGSGDSLEmSSLDR	Q3TSX8	S2(phospho); M19(Oxidation)
RNsAEETWMVIHGR	Q3TH64	S3(phospho)
EAEDVIWEDsEAEEDPERPGK	Q9CWY8	S10(phospho)
IHPEASHPAAIQQDscEER	Q3UW53	S15(phospho); C16(Carbamidomethyl)
mREDYDsVEQDGDEPGPQR	A0A023T672	M1(Oxidation); S7(phospho)
GDNAsPsPSGTPLVR	Q3TE28	S5(phospho); S7(phospho)
RPTLAWLEDSSscSDIPK	S4R1L5	S12(phospho); C13(Carbamidomethyl)
SHsSPSLNPDASPVTAK	E9PUC5	S3(phospho)
VAAAAGSGPsPPcsPGHDR	Q2TBE6	S10(phospho); C13(Carbamidomethyl); S14(phospho)
AENKVENEsDEGDKIQDR	D3Z1X8	S9(phospho)
YHGHsmSDPGVsYR	P35486	S5(phospho); M6(Oxidation); S12(phospho)
ATGAALTPtEER	Q3TRT6	T9(phospho)
QsPGPALAR	P42128	S2(phospho)
RIPYtPGEIPK	D3Z3F7	T5(phospho)
RDsLTGSSDLYK	E9Q6M7	S3(phospho)
DAtPEScSLLPQNEER	Q8BNW8	T3(phospho); C7(Carbamidomethyl)
GSAEGssDEEGKLVIDEPAKEK	E0CXA0	S6(phospho); S7(phospho)
SAGSSsPEAGEDsDHEDGNYcPPVK	Q9CT10	S6(phospho); S13(phospho); C21(Carbamidomethyl)
ENYEDQEPLVGHEsPITLAAR	B9EKJ7	S14(phospho)
RDsSESQLASTESDKPTTGR	Q8BH50	S3(phospho)
GNsDGYIIPINK	Q0P6A0	S3(phospho)
RQGsFSEDVISHK	F6Q750	S4(phospho)
IAAPELQKGDsDSEEDEPAK	Q05CA9	S11(phospho)
LsTHSPFR	A0A068WAQ5;Q3UH12	S2(phospho)
KLHVsTINLQK	Q9JLN9	S5(phospho)
NVEsVSPESTHPPVLLPGQAR	E9PXW0	S4(phospho)
TLDLPLKPEVLASDGVALEsEDEEDSATEHQELPVK	B1ATR2	S20(phospho)
LAIQGPEDsPSR	Q3URS8	S9(phospho)
VHAYFAPVtPPPsVGGSR	Q9CZV8	T9(phospho); S13(phospho)
VVcDADDsDsDVVSDK	Q8C1D8	C3(Carbamidomethyl); S8(phospho); S10(phospho)
VQIPVSHPDPEPVSDNEDDsYDEEVHDPR	B9EHJ3;P39447	S20(phospho)
SSLPHsQENLPK	C0IXK2	S6(phospho)
EKtPsPKEEDEEAESPPEK	Q80XU3	T3(phospho); S5(phospho)
RPDYAPMEssDEEDEEFQFIK	Q9CQU1	S9(phospho); S10(phospho)
ANTLsPVR	Q69Z38	S5(phospho)
TRPGsFQSLSDALSDTPAK	Q3UM95	S5(phospho)
NLsPGAVESDVR	Q63ZW9	S3(phospho)
SHIPSEPYEPIsPPQGPAVHEK	Q5RIM6	S12(phospho)
KLsLPTDLKPDLDVK	F6WXQ4	S3(phospho)
RVsQDLDVEKPDASPTSLQLR	F8VQK5	S3(phospho)
SSEAAGSSSLISHcSSDPADRLsPFLAAR	Q3UUG6	C14(Carbamidomethyl); S23(phospho)
ESQAVVDPPPQAVSTGTPQsPAVAAAAATTTATTTTTSGGHPLEFLR	Q3TJ52	S20(phospho)
SRsTTELNDPLIEK	F6TFN2	S3(phospho)
RAsLSDLTHLEDIEGLTVR	Q148A8	S3(phospho)
GLLSQNGSFGPSPVsGGEcSPPLPAEPPGRPLSATLSR	Q8BI84	S15(phospho); C19(Carbamidomethyl)
GEGVSQVGPGtPPAPEsPRKPISGVQGNDPGISLPQR	B9EKJ7	T11(phospho); S17(phospho)
LIFPNPFGHLSDsFSHSR	Q64337	S13(phospho)
EGQESPAsPPEWK	Q9DBT9	S8(phospho)
LLEDGEDFSLNDALDSSNsmQTVQK	P05784	S19(phospho); M20(Oxidation)
TLssPTGTETNPPK	B1AZ15	S3(phospho); S4(phospho)
LLPEGEETVEsDDDKDER	Q9CWU4	S11(phospho)
sETAPAAPAAPAPAEK	P43274	N-Term(Acetyl); S1(phospho)
sPNELVDDLFK	Q3KQQ1	S1(phospho)
EGEsLEDLMK	Q3TJX0	S4(phospho)
RLsEQLAHTPTAFK	Q8BKC8	S3(phospho)
VSsFSMPSSSR	P70227	S3(phospho)
HGTDLWIDSMNSAPSHsPEKK	Q99K28	S17(phospho)
SQsLPHSATVTLSGTSDPHALADSALSK	Q8R5A6	S3(phospho)
GLPSPYNmSAPGsR	E9PZW0	M8(Oxidation); S13(phospho)
LLRQsPPLAGREEEPGLGDSGIQSTPGSGHAPR	Q8VDZ4	S5(phospho)
sLQLPASPAPEPSTRPAYK	Q3UEX8	S1(phospho)
SEKPAQSASsPEATSGSAGPVEK	D3Z197	S10(phospho)
VQSQEETRsDEEDRASEPK	Q0P678	S9(phospho)
VSNQsFTEIER	Q99K28	S5(phospho)
ASAPRPPPAPADGADPAPVEESEARPDGEGsPSK	Q6PAJ1	S31(phospho)
SSsLmDIR	Q920R0	S3(phospho); M5(Oxidation)
FAVLNDsDKSDDEASScNDQLK	Q8R5F7	S7(phospho); C17(Carbamidomethyl)
SQsESsDEVTELDLSHGK	Q3TSE2	S3(phospho); S6(phospho)
KKsPIVNER	Q61136	S3(phospho)
VQSsPNLLAAGR	Q3UTJ2;D3Z080	S4(phospho)
STPFIVPsSPTEQGGR	A2AU91	S8(phospho)
VSALEEDMDDVEssEEEEEEDEKLER	Q4FK66	S13(phospho); S14(phospho)
sSFDGSSLLSDK	Q8CAP5	S1(phospho)
GPGQVSTAASALSLDLQEVEPLGLPQAsPSR	F6ZJ27	S28(phospho)
TDSSGPVSQTGQPAGDLELAPSRLsPALPHK	D3YYY8	S25(phospho)
HLQQGSEsPMMIGELR	B1AY13	S8(phospho)
HQDGLPYIDDsPSSSPHLSSK	Q6PAJ1	S11(phospho)
mEEVTSQEAAEsPR	Q6P8W7	N-Term(Acetyl); S12(phospho)
YsPsPPPK	A2A8V8	S2(phospho); S4(phospho)
IsPPVKEEEAK	Q8BJ05	S2(phospho)
tPSSQNLLTLLAR	Q80TT3	T1(phospho)
KsPSLASEK	Q8CI52	S2(phospho)
RNsLPQIPTLNLEAR	Q8C6R5	S3(phospho)
TLVHsSSDGHIDPQHTAGK	Q571K4	S5(phospho)
ERsMSENAVR	F7B1A4	S3(phospho)
RRGsDIDNPTLTVTDISPPSR	G5E8L8	S4(phospho)
QMsYGPEEQLER	A2AJ88	S3(phospho)
SGSLDSELSVsPK	E9Q394	S11(phospho)
IQQQLGEEAsPR	S4R2U9	S10(phospho)
RAsRsLDGAAAAESTDR	A0A068WAQ5	S3(phospho); S5(phospho)
GRsESQMDITDINAPKPK	Q8BNU9	S3(phospho)
FENAFLSHVIsQHQSLLGNIR	Q03265	S11(phospho)
NsSSTVScLK	Q8BPY1	S2(phospho); C8(Carbamidomethyl)
EEELEETGNQHNDVEVEEAGEEEEKEAGIVHsDAEK	O35691	S32(phospho)
MSPNETLFLEsTNK	Q99K70	S11(phospho)
VEPPHSsHEDLTDDLSTR	B1ATA0	S7(phospho)
SRsPVDSPVPASMFAPEPsSPGAAR	O08582	S3(phospho); S19(phospho)
IVEPEVVGEsDsEVEGDAWR	Q9CQU1	S10(phospho); S12(phospho)
ScEEEsDPEPDPDPDTQAEAYVAR	Q80XN6	C2(Carbamidomethyl); S6(phospho)
LSSESHHGGsPIHWVLPAGMSAK	D6RG95	S10(phospho)
LRSyEDMIGEEVPPDQYYWAPLAQHER	G3X9V2	Y4(phospho)
HYsPEDELSAEAQPIAAYK	Q6PIU9	S3(phospho)
AIPGEAGDAAILPsLSQEGQEK	Q3UJU9	S14(phospho)
EsEALPEKEGDELGEGERPEDDTAAIELsSDEAVEVEEVIEESR	O54724	S2(phospho); S29(phospho)
sPTmEQAVQTASAHLPAPAPVGR	Q8K2F8	S1(phospho); M4(Oxidation)
LSPsPTSQR	P48678	S4(phospho)
TFSHsDGEDEDVDVDVPGPAPR	O88502	S5(phospho)
sLPAFPTYLPLIR	G5E8Q0	S1(phospho)
QADVADQQTTELPAENGETENQSPAsEEEKEAK	D3Z607	S26(phospho)
tKDYQDFQHLDNDNDHHQLR	B1AR34	N-Term(Acetyl); T1(phospho)
STGVSFWTQDSDENEQERQsDTEDGSSK	Q9DBR7	S20(phospho)
SPsPAPPPPPPPPPPR	A2A8V8	S3(phospho)
ASVRGssEDDEDTRTPDR	Q6DVA0	S6(phospho); S7(phospho)
KADGPRPSLDYVELSPLAPsSPQR	G5E8W1	S20(phospho)
EADEEDsDEETSYPER	D3Z316	S7(phospho)
EDEEEsLNEVGYDDIGGcR	Q01853	S6(phospho); C18(Carbamidomethyl)
GsHcSGSGDPAEYNLR	P48678	S2(phospho); C4(Carbamidomethyl)
TDsREDEISPPPPNPVVK	A2AI69	S3(phospho)
sIHEVDISNLEAALR	Q3UEX8	S1(phospho)
RRsPsPAPPPPPPPPPPR	A2A8V8	S3(phospho); S5(phospho)
YHsADDILDAGLDQQQRPQYIHER	A2ALU4	S3(phospho)
ARYPsGSEIPVVEDEEKVDER	E3VVQ8	S5(phospho)
NLIDSMDQEAFHGFsFVNPK	F1DGF6	S15(phospho)
AHsLLFENSDSFSEDTGTLGR	Q501J7	S3(phospho)
mLPHAPGVQmQAIPEDAIPEEsGDEDEEDPDKR	D3YYI8	M1(Oxidation); M10(Oxidation); S22(phospho)
SRLsAIEIDIPVVSHST	Q9ET43	S4(phospho)
LEVTsDSEDASEVPEWLR	Q6A029	S5(phospho)
NEGITQPLPDSPKPMGTDQAIDALSSDFtcSSPTGK	Q921U7	T29(phospho); C30(Carbamidomethyl)
IsSKsPGHMVILNQTK	Q8CH25	S2(phospho); S5(phospho)
DSsPGSLPK	Q8R4Z6	S3(phospho)
LTsVSSSVDFDQR	D3YYJ8	S3(phospho)
STsTPNVHMVSTTLHVDSR	Q99N57	S3(phospho)
sADAAAGEPLPR	P70441	N-Term(Acetyl); S1(phospho)
SLsADNFIGIQR	E9Q226	S3(phospho)
FQsVPAQPGQTSPLLQYFGILLDQGQLNK	Q68FD5	S3(phospho)
SPtAQSPTSSVEAESPDQK	Q8CAP5	T3(phospho)
RNsPMAQTPPcHLPNIPGVTSPGALIEDSK	P70445	S3(phospho); C11(Carbamidomethyl)
SHETDGGsAHGDEEDDGPHFEPVVPLPDKIEVK	Q9ERU9	S8(phospho)
SLSPQGRDsPPPEGLGTHQLPYSEPK	Q148V8	S9(phospho)
KLDPAQsASRENLLEEQGSIALR	A3KGU5	S7(phospho)
RGsGSVDETLFALPAASEPVIPSSAVVDLLYWR	Q8BHF5	S3(phospho)
FQsLGVAFYR	P51150	S3(phospho)
SRDESASETSTPSEHSAAPsPQVEVR	Q9JMH9	S20(phospho)
NDsWGSFDLR	Q5F2E7	S3(phospho)
EYVNSTSEEsHDEDEIRPVQQQDLHR	Q9D9C1	S10(phospho)
HDtPDPsPPR	Q8R149	T3(phospho); S7(phospho)
AFsEQGPLR	F6RJ64	S3(phospho)
SsADSLPGPISR	B7ZC23	S2(phospho)
GsPPVPSGPPMEEDGLR	Q9EP97	S2(phospho)
EDSVVAETQLASHsPEEQR	F6TFN2	S14(phospho)
sSSVPYPFQVNLLHNSEGR	Q3U5C8	S1(phospho)
QMNMsPPPGNAGPVIMSLEEK	D3YUB9	S5(phospho)
ILLVDsPGMGDGEDEQQEEGTSK	E9Q2B0	S6(phospho)
SQHSsGNGNDFEMITK	Q8CIK3	S5(phospho)
APsPAPAVsPK	Q5U4C3	S3(phospho); S9(phospho)
SSsSDSIHSVR	F8WHT2	S3(phospho)
SSsLGDLLR	Q8K124	S3(phospho)
ESGsPAQEFSK	F7AYW2	S4(phospho)
sPYQEFTDHLVK	Q3TXR5	S1(phospho)
SLDDsEEEDDEDSGHSSR	O35245	S5(phospho)
RRsPAAFTSPPIGTVTPALK	Q8C713	S3(phospho)
RAGDVLEDsPKRPK	E0CXA0	S9(phospho)
TEDEEFLIQHLLQAPsPPR	Q6PDJ2	S16(phospho)
FSGEEGEIEDDEsGTENREEK	Q569Z6	S13(phospho)
GSAEGSsDEEGKLVIDEPAK	E0CXA0	S7(phospho)
ELEEEEENsDEDELDSHTmVK	Q9CW82	S9(phospho); M19(Oxidation)
MADGGGsPFLGR	Q8K0M3	S7(phospho)
KGsPTSGFPNR	Q148V8	S3(phospho)
NLPDsDSEEcLVHGDFK	Q80XL6	S5(phospho); C10(Carbamidomethyl)
NLsLPFILHEK	P18581	S3(phospho)
NSPTFKsFEEK	D3Z637	S7(phospho)
LTSQDsYNNFTNNNPGNPR	F7C0F2	S6(phospho)
VGDTEKPEPERsPPNR	Q3TQI7	S12(phospho)
AAsGAPLRPATVLGTMEMGR	Q8CG76	S3(phospho)
tRSFDNLTTTcENMVPLASR	M0QW74	T1(phospho); C11(Carbamidomethyl)
sSSELGMIFNER	D3YUC2	S1(phospho)
sLDSAETYSQHAQSLDGTMGSSIPLYR	D3Z080;Q3UTJ2	S1(phospho)
LsPDFVEELR	Q80U72	S2(phospho)
RDsETEVEELRK	E9Q0A7	S3(phospho)
APLDVPEsPKPFSQIQAVFAGSDDPFATALSMSEMDR	Q3TB00	S8(phospho)
HHsEEEGEAESGFSAVcEEEIPSAPPSTSVSLETLR	Q3UGS6	S3(phospho); C17(Carbamidomethyl)
SVNEILGLAESsPK	Q3TUU0	S12(phospho)
GRscTQVDPEMEEKDEETK	E0CXY0	S3(phospho); C4(Carbamidomethyl)
SRtsVQTEDDQLIAGQSAR	P26231	T3(phospho); S4(phospho)
MsFSGIFR	Q3U4D5	S2(phospho)
DQDMSsPTTMK	Q6GSP7	S6(phospho)
GVAPADsPDAPRR	Q6ZPS6	S7(phospho)
FDPLKPcEcRsDDDYAcGDSPEVLELK	Q5HZI1	C7(Carbamidomethyl); C9(Carbamidomethyl); S11(phospho); C17(Carbamidomethyl)
SEsSDFEVVPK	S4R294	S3(phospho)
QGsPTKDIEIQFQR	Q6ZPF3	S3(phospho)
LKFsDEEDGRDsDEEGAEGHK	Q5DTJ4	S4(phospho); S12(phospho)
FSEMMDHMGGDEDVDLPEVDGADDDsQDsDDEK	Q3TJG6	S26(phospho); S29(phospho)
QPtPPFFGR	Q62019	T3(phospho)
DsPGIPPSAGAHQLFR	G3UZI3	S2(phospho)
REEQTDtsDGESVTHHIR	P36916	T7(phospho); S8(phospho)
TDGKEEEEQPSTSATQSsPAPGQSK	B2RWS6	S18(phospho)
EEPLsEEEPcTSTAVPsPEKK	Q6DFW4	S5(phospho); C10(Carbamidomethyl); S17(phospho)
TTATLDPtSPAPGEGPSGR	Q3U1J1	T8(phospho)
SGsLLSLQTELLLDLVAEAQSR	Q3U1Z5	S3(phospho)
TESILDKEDKVPMAGVGGTEGPEQLPAPcPsQTGSPPVGLIK	Q3TGG2	C29(Carbamidomethyl); S31(phospho)
RAsDGGANIQLHAQQLLK	F6U6U5	S3(phospho)
GIPLPTGDtSPEPELLPGDPLPPPK	Q3THA0	T9(phospho)
EGEEPTVYsDDEEPK	Q3TFP8	S9(phospho)
TPISKPGVGEAsPPSTPEHSPETMGK	E9PVP1	S12(phospho)
TLSAHsVPNISGAAcSAFSPFGcPYSHR	A2AQD6	S6(phospho); C15(Carbamidomethyl); C23(Carbamidomethyl)
MSFASNLNHYGMTHVAsVSDVLLDNAFTPPcQR	Q5SWU9	S17(phospho); C31(Carbamidomethyl)
sPGNTSQPPAFFSK	E9PY55	S1(phospho)
GGESEDFSsVRR	Q5XG73	S9(phospho)
LAAsVLDALDSPGPTLDPLDLLPYSEAR	Q3TAC6	S4(phospho)
sPGLGGGEGGSHGVIQDLSLLHQHAQQQPAQHHR	Q99LI5	S1(phospho)
KAAsLTEDR	E9PVC6	S4(phospho)
AsPAGTAGGPVAGVATAGTGPVAAR	Q8K0H5	S2(phospho)
sLQSVAEER	B8JKK2	S1(phospho)
DAsPPPAFKPEPPK	Q9Z0U1	S3(phospho)
EADMSSIQIPSsPPAHGSPQLR	B2RUA5	S12(phospho)
sAIQNLHsFDPFADASK	P48024	N-Term(Acetyl); S8(phospho)
VQEAQDsDSDtEGGATGGEAEMDFLR	Q8VDQ8	S7(phospho); T11(phospho)
QVsAGDLFR	Q8R0W0	S3(phospho)
HIKEEPLsEEEPcTSTAVPsPEK	Q6DFW4	S8(phospho); C13(Carbamidomethyl); S20(phospho)
FEGMsPLQR	Q9D8S9	S5(phospho)
SSsPEPVTHLK	Q5FWK3	S3(phospho)
KVMsPLQsPTK	Q3UIL6	S4(phospho); S8(phospho)
HSSsSPVSGTmDKPVDLSTR	Q9ERU9	S4(phospho); M11(Oxidation)
EFGDGsDENEVEDQEPR	Q3URP7	S6(phospho)
GSYQDsLR	J3QNY6	S6(phospho)
STsPIIGSPPVR	Q3TC46	S3(phospho)
SIsFPEVPR	E3VVQ8	S3(phospho)
RsEtPPHWR	Q504N1	S2(phospho); T4(phospho)
SKPIPImPAsPQK	E9PUD2	M7(Oxidation); S10(phospho)
VIENtDGsEEEMDAR	O08638	T5(phospho); S8(phospho)
sPPLPAVIK	Q6PCN6	S1(phospho)
LTVENsPKQETGITEGQGPVGEEEEK	E9Q0G1	S6(phospho)
LLDHMAPPPVAEQAsPR	Q9WTP2	S15(phospho)
TGsYGALAEISASK	Q9DBR7	S3(phospho)
ADHSsENAFVFGGPFLTDESSLLAFPEATEEEK	Q63880	S5(phospho)
RPDAPAAsLsPPAAEPGHSGHR	Q8BIZ6	S8(phospho); S10(phospho)
NLNNSNLFSPVNHDSEDLAsPSEYPENGER	Q3TPG3	S20(phospho)
DRGGDTsDTESSIIIR	Q8BNW8	S7(phospho)
HsGQDVHVVLK	Q3KQQ1	S2(phospho)
GILSLPHQAsPVSR	Q3U556	S10(phospho)
ESLPLDLsDDQSNSK	Q9CRW9	S8(phospho)
RNEAFVcKPDPSPPsPSEEEK	Q80U72	C7(Carbamidomethyl); S15(phospho)
tPPKDLPAIPGVTSPTSDEPPmQASQSQLPSSPEDKR	Q3TII9	T1(phospho); M22(Oxidation)
VIENTDGsEEEmDAR	O08638	S8(phospho); M12(Oxidation)
NLsLTSSAPPLPSPGR	Q3THY1	S3(phospho)
RPDYAPmEssDEEDEEFQFIK	Q9CQU1	M7(Oxidation); S9(phospho); S10(phospho)
RsPTSSAIPFQSPR	Q5HZI1	S2(phospho)
RGsFPLAASGPAQAAPAPPPEDAR	Q9D4F2	S3(phospho)
LRPYFEGLSHSsSQTEIGSIHSAR	Q3V3Q7	S12(phospho)
EDALDDSVSSSSVHASPLAsSPVR	Q9ERU9	S20(phospho)
LHSDSGISVDsQSLHDQQTHTQTASGQALK	Q8BYY1	S11(phospho)
AASADSTTEGtPTDGFTVLSTK	Q8CA90	T11(phospho)
mEKPPsPPPPPR	Q99MD6	N-Term(Acetyl); S6(phospho)
ISYtPPEsPVASHR	P97360	T4(phospho); S8(phospho)
QQSFSGsLEGLAGHDGSEK	Q4VAC9	S7(phospho)
DEEALEDsAEEK	Q63918	S8(phospho)
GtPSQsPVVGR	A0A087WRL1	T2(phospho); S6(phospho)
NRPGYVsEEEEDDEDYEMAVK	Q9ERU9	S7(phospho)
LRPQSVQSSFPSPPsPSSDVQLTTLAHR	I6L970	S15(phospho)
VNSSGESGGEsDEFLQSR	Q05D44	S11(phospho)
INSSGKEsPGSSEFFQEAVSHGK	Q8C929	S8(phospho)
LEGLKPLsPENLPVPEVSR	Q9JJ89	S8(phospho)
HELsPPQKR	Q99MR6	S4(phospho)
GRLDSsEMDHsENEDYTMSSPLPGK	Q4VA53	S6(phospho); S11(phospho)
HGLLLPAsPVR	Q9DB52	S8(phospho)
cDGsPRtPPSTPPATANLSADDDFQNTDLR	E0CXZ5	C1(Carbamidomethyl); S4(phospho); T7(phospho)
EVDGLLTSDPMGsPVSSK	Q3TGG2	S13(phospho)
NMPNVsDSETYNSDFDDSSPR	Q8R2M2	S6(phospho)
GNVVPsPLPTR	Q3U434	S6(phospho)
SHHAPMsPGSSGGGGQPLAR	A2BH40	S7(phospho)
AAsPsPQSVR	A2A8V8	S3(phospho); S5(phospho)
sSPPATDPGPVPSSPSQEPPTK	Q922Y1	S1(phospho)
HELsPPQK	Q99MR6	S4(phospho)
YEPAAVsEHGDKK	Q3TXF9	S7(phospho)
ISLPLPTFsSLNLR	Q3UD36	S9(phospho)
GPsPAPVDTESPVEMPEK	Q9DC40	S3(phospho)
RDsFDDRGPSLNPVLDYDHGSR	Q3TTX0	S3(phospho)
GEKtPPDTELHQEPVPADLVLK	Q8VDC1	T4(phospho)
sDEQLSSLDR	E0CXV1	S1(phospho)
TREEEPcQQSSSsPPLVTDK	Q6A036	C7(Carbamidomethyl); S13(phospho)
RSSsSLGVPLTEVIEPLDFEDVLLSRPPEVEPGPLR	Q8VDR9	S4(phospho)
IsGSPAQSScQVEHSSALAVEELGFER	Q9CV28	S2(phospho); C10(Carbamidomethyl)
TLTDEVNsPDSDRR	Q3UID0	S8(phospho)
GVTIPYRPKPsSSPVIFAGGQDR	Q3TF69	S11(phospho)
NLtSsSLNDISDKPEK	O88343	T3(phospho); S5(phospho)
TTsAGTGGMWR	Q9CQS8	S3(phospho)
tSLHALTVDLPK	D3Z4C0;Q91VS8	T1(phospho)
FEDEDsDDVPR	Q8BU35	S6(phospho)
ASLGsLEGEVEAEASSPK	E9Q616	S5(phospho)
NTcNsTEKPEELVR	Q3UZA1	C3(Carbamidomethyl); S5(phospho)
SIFREEsPLR	A0A087WQA0	S7(phospho)
SsPEIAPSDVTDESEAVTVAGNEK	F6W2Q5	S2(phospho)
EATLPPVsPPK	E9PVC6	S8(phospho)
HKEELLENEDEQNsPPK	Q4VA53	S14(phospho)
AVtPVPTK	Q6ZQ58	T3(phospho)
YSDtTDSDPENEPFDEDQHSQITK	Q3UUT8	T4(phospho)
LDSMSsVEEDDYDTLTDIDSDKNVIR	F7DFH5	S6(phospho)
ELVSSSSSGSDSDsEVEK	P11031	S14(phospho)
KGsATDYQESMDTDKDDPHGR	Q6F6D5	S3(phospho)
KVsLLQIAENPELQLQPEGFR	Q8C7K3	S3(phospho)
sSQIGAVVSR	Q91XF0	S1(phospho)
GGDYALAPGSQSSEMsLR	G3UX20	S16(phospho)
AGIPQHHPPMAQNLQYPDDsDDEKK	Q9JKF6	S20(phospho)
sDNEETLGRPAQPPNAGESPHSPGVEDAPIAK	Q8BT15	S1(phospho)
TISSSPsIESLPGGR	Q4KMV6	S7(phospho)
YsPSQNsPIHHIPSR	A0A087WQA0	S2(phospho); S7(phospho)
DLDKsQEEIKK	Q3UH12	S5(phospho)
aEsQLScLDEAHVNER	Q3UKU4	N-Term(Acetyl); S3(phospho); C7(Carbamidomethyl)
KLsNPDIFAPTGK	B1AST8	S3(phospho)
KVsVEPQDsHQDAQPR	Q4VA99	S3(phospho); S9(phospho)
SPTSDDIsLLHESQSDR	Z4YLT8	S8(phospho)
sWESSSPVDRPELEAASPTTR	H3BKM2	S1(phospho)
LSsTGGQTPR	Q8C1D8	S3(phospho)
APKEELAsDLEEMATSSAK	A2APD7	S8(phospho)
TSEAGPDKETASTLVQEAsPELSPEER	Q9CXL3	S19(phospho)
SLsPQGRDsPPPEGLGTHQLPYSEPK	Q148V8	S3(phospho); S9(phospho)
ASMSEFLEsEDGEVEQQR	E9PW15	S9(phospho)
tVSIsESEEPPLAEPEDEPSKEPSKR	Q640L3	T1(phospho); S5(phospho)
sPDIFSEQR	Z4YJJ0	S1(phospho)
ETsMVHELNR	P61620	S3(phospho)
SVsEAALAQPEGLLGTDTLK	P54310	S3(phospho)
ISDPLtSSPGR	P97310	T6(phospho)
VSsPVLETVQQR	Q8BTI8	S3(phospho)
TDGFAEAIHsPQVAGVPR	Q7M739	S10(phospho)
SPsFASEWDEIEK	P59672	S3(phospho)
ERDHsPTPSVFNSDEER	Q9D824	S5(phospho)
YEVAAQHEADDGsALGDGASPVAEQVK	Q9Z1K8	S13(phospho)
AELGmNDsPSQSPPVK	Q8C141	M5(Oxidation); S8(phospho)
sLVGTPYWMAPELISR	Q8K0U2	S1(phospho)
RDsSDDWEIPDGQITVGQR	F6SZ47	S3(phospho)
EGLRPGDTTStFcGTPNYIAPEILR	Q3TJJ5	T11(phospho); C13(Carbamidomethyl)
SDsELEVKPSESLLR	Q3UWC4	S3(phospho)
HSLSSESQAPEDIAPPGsSPHANR	Q99K30	S18(phospho)
IQQQAGTVPHSQEEDsQEEEEDVSSR	Q99LG1	S16(phospho)
APTPTQSVADHLEEELDMLLHLDAPVQEEGNIsPDQTSR	A2AGL5	S33(phospho)
QGAIYHGLATLLNQPsPMMQR	E9PYX7	S16(phospho)
sSPINLAQSGSPNHVDSAYFPGSSTSSSSDNDEGGGGATNHISGNK	Q6A0A9	S1(phospho)
KPEKPLFSSTSPQDsSPR	Q6GSP7	S15(phospho)
YFDSFGDLSsASAImGNAK	A8DUK4	S10(phospho); M15(Oxidation)
EMEKsFDEHTVPK	E3VVQ8	S5(phospho)
DPQcSASSELSGPSTPLHtSSPVQGK	Q8CGB6	C4(Carbamidomethyl); T19(phospho)
sGSLESQSHLLSEMDSDKPFFTLSK	Q8K0I1	S1(phospho)
VGVAEGsPVSR	Q80UG7	S7(phospho)
KPPAPPsPVQsQSPSTNWsPAVPAK	A2A8V8	S7(phospho); S11(phospho); S19(phospho)
ALEKPVLAEPQEPAASVDTAGPEPscSPAAGAAVLSQR	Q3TKH5	S25(phospho); C26(Carbamidomethyl)
LMKPPsPEHQSPDTQQEGGEEEEAMVAR	Q6PCN6	S6(phospho)
TGEPDEEEGTFRsSIR	Q9Z239	S13(phospho)
SEAAAPHAAGGGLSsDEEEGTSSQAEAAR	P51612	S15(phospho)
PsKGPLQSVQVFGR	P14131	S2(phospho)
sLEIIGAPFSK	Q61176	S1(phospho)
GNSELSEAENMDtPPDDESK	Q3UD30	T13(phospho)
SEPPGSGsPAPPR	A2A6A1	S8(phospho)
GEsIEPLDPSEK	Q61526	S3(phospho)
LVHSGPGKGsPQAGMDLSFATR	Q99L88	S10(phospho)
AsPITNDGEDEFVPsDGLDKDEYAFSSGK	Q64511	S2(phospho); S15(phospho)
GPPDFssDEEREPTPVLGSGASVGR	Q61033	S6(phospho); S7(phospho)
EsPEGSYTDDANQEVR	E9PUK3	S2(phospho)
SIsTVDLTEK	Q9DBJ3	S3(phospho)
TGPEDVDDPQHcSGsPEDTPR	Q8VDR9	C12(Carbamidomethyl); S15(phospho)
AsSLGETDESSELR	G3UXH4	S2(phospho)
IsDsESEELPKPR	Q8C1D8	S2(phospho); S4(phospho)
AAAAALSGsPPQTEKPTHYR	Q5FWH2	S9(phospho)
TEESAPGPGGADAAsER	D6RGQ3	S15(phospho)
[truncated: 3,362 more rows]
